# Supplementary material for: Rejection of immunogenic tumor clones is limited by clonal fraction
Source: eLife. 2018 Nov 30;7:e41090. doi: 10.7554/eLife.41090 (PMC6269121; doi:10.7554/eLife.41090)
Supplement: Figure 3—source data 1. [file elife-41090-fig3-data1.xlsx]

## Sheet: RS20_counts_and_frequencies.csv
peptide	DNA	pool	WT_PreTumor_1	WT_PreTumor_1_pseudocount	WT_PreTumor_1_freq	WT_PreTumor_2	WT_PreTumor_2_pseudocount	WT_PreTumor_2_freq	WT_PreTumor_3	WT_PreTumor_3_pseudocount	WT_PreTumor_3_freq	MUT_PreTumor_1	MUT_PreTumor_1_pseudocount	MUT_PreTumor_1_freq	MUT_PreTumor_2	MUT_PreTumor_2_pseudocount	MUT_PreTumor_2_freq	MUT_PreTumor_3	MUT_PreTumor_3_pseudocount	MUT_PreTumor_3_freq	WTandMUT_Mix_PreTumor_1	WTandMUT_Mix_PreTumor_1_pseudocount	WTandMUT_Mix_PreTumor_1_freq	WTandMUT_Mix_PreTumor_2	WTandMUT_Mix_PreTumor_2_pseudocount	WTandMUT_Mix_PreTumor_2_freq	WTandMUT_Mix_PreTumor_3	WTandMUT_Mix_PreTumor_3_pseudocount	WTandMUT_Mix_PreTumor_3_freq	WT_tumor_1	WT_tumor_1_pseudocount	WT_tumor_1_freq	WT_tumor_2	WT_tumor_2_pseudocount	WT_tumor_2_freq	WT_tumor_3	WT_tumor_3_pseudocount	WT_tumor_3_freq	WT_tumor_4	WT_tumor_4_pseudocount	WT_tumor_4_freq	WT_tumor_5	WT_tumor_5_pseudocount	WT_tumor_5_freq	MUT_tumor_1	MUT_tumor_1_pseudocount	MUT_tumor_1_freq	MUT_tumor_2	MUT_tumor_2_pseudocount
AAEEFAFL	GCCGCGGAGGAATTCGCCTTCCTC	WT	795	796	0.000213925	274	275	0.000203295	1202	1203	0.000192356	NA	NA	NA	NA	NA	NA	NA	NA	NA	427	428	9.09801e-05	194	195	9.02803e-05	74	75	9.38559e-05	25	26	1.3992e-05	73	74	3.68884e-05	12	13	1.79901e-05	180	181	5.12746e-05	186	187	4.04087e-05	NA	NA	NA	NA	NA
AAEFHPGL	GCAGCTGAGTTTCACCCTGGGCTT	WT	571	572	0.000153725	227	228	0.00016855	1144	1145	0.000183082	NA	NA	NA	NA	NA	NA	NA	NA	NA	397	398	8.4603e-05	152	153	7.08353e-05	62	63	7.8839e-05	56	57	3.06748e-05	20258	20259	0.0100989	28	29	4.01318e-05	92	93	2.63455e-05	91	92	1.98802e-05	NA	NA	NA	NA	NA
AAELYLNL	GCGGCCGAGTTGTACCTTAATCTC	WT	3205	3206	0.000861612	1280	1281	0.000946986	5802	5803	0.000927883	NA	NA	NA	NA	NA	NA	NA	NA	NA	2110	2111	0.000448736	862	863	0.000399548	326	327	0.000409212	2293	2294	0.00123453	927	928	0.0004626	72	73	0.000101021	9594	9595	0.00271812	1997	1998	0.000431747	NA	NA	NA	NA	NA
AAEYLAML	GCTGCAGAATACTTGGCGATGCTA	WT	350	351	9.43312e-05	117	118	8.72322e-05	690	691	0.000110489	NA	NA	NA	NA	NA	NA	NA	NA	NA	229	230	4.88912e-05	90	91	4.21308e-05	29	30	3.75424e-05	668	669	0.000360025	3	4	1.99397e-06	1	2	2.76771e-06	1	2	5.6657e-07	2	3	6.48269e-07	NA	NA	NA	NA	NA
AAFALFSL	GCCGCATTTGCATTGTTCTCTCTT	WT	1683	1684	0.000452575	605	606	0.000447989	2600	2601	0.000415892	NA	NA	NA	NA	NA	NA	NA	NA	NA	954	955	0.000203005	471	472	0.000218525	154	155	0.000193969	755	756	0.000406845	339	340	0.000169487	239	240	0.000332125	658	659	0.000186685	2361	2362	0.000510403	NA	NA	NA	NA	NA
AAFMLFCI	GCTGCCTTCATGTTATTCTGTATC	WT	5743	5744	0.0015437	2062	2063	0.00152508	9757	9758	0.00156028	NA	NA	NA	NA	NA	NA	NA	NA	NA	3440	3441	0.000731455	1674	1675	0.000775485	648	649	0.000812167	1125	1126	0.000605962	3206	3207	0.00159866	982	983	0.00136033	4592	4593	0.00130113	8039	8040	0.00173736	NA	NA	NA	NA	NA
AAFQALGL	GCGGCGTTTCAGGCGTTGGGTCTG	WT	960	961	0.000258269	332	333	0.000246172	1755	1756	0.000280779	NA	NA	NA	NA	NA	NA	NA	NA	NA	655	656	0.000139446	267	268	0.000124078	88	89	0.000111376	174	175	9.4177e-05	398	399	0.000198898	40	41	5.67381e-05	5442	5443	0.00154192	1128	1129	0.000243965	NA	NA	NA	NA	NA
AAFQGLFL	GCTGCCTTCCAGGGGCTGTTTCTT	WT	485	486	0.000130612	146	147	0.000108671	643	644	0.000102974	NA	NA	NA	NA	NA	NA	NA	NA	NA	272	273	5.80317e-05	127	128	5.92609e-05	51	52	6.50735e-05	220	221	0.000118932	2	3	1.49547e-06	12	13	1.79901e-05	83	84	2.37959e-05	35	36	7.77922e-06	NA	NA	NA	NA	NA
AAFTLAHI	GCGGCGTTCACACTCGCGCATATT	WT	637	638	0.000171462	254	255	0.00018851	973	974	0.00015574	NA	NA	NA	NA	NA	NA	NA	NA	NA	359	360	7.65253e-05	183	184	8.51876e-05	83	84	0.000105119	511	512	0.000275535	11	12	5.9819e-06	17	18	2.49094e-05	3632	3633	0.00102917	94	95	2.05285e-05	NA	NA	NA	NA	NA
AAFTYAII	GCGGCGTTTACCTACGCGATCATC	WT	289	290	7.79375e-05	89	90	6.6533e-05	508	509	8.13876e-05	NA	NA	NA	NA	NA	NA	NA	NA	NA	191	192	4.08135e-05	87	88	4.07419e-05	33	34	4.2548e-05	8	9	4.84339e-06	2	3	1.49547e-06	13	14	1.9374e-05	7981	7982	0.00226118	265	266	5.74798e-05	NA	NA	NA	NA	NA
AAFVVVLL	GCCGCATTTGTCGTTGTACTTCTG	WT	2775	2776	0.00074605	1086	1087	0.000803571	4759	4760	0.00076111	NA	NA	NA	NA	NA	NA	NA	NA	NA	1870	1871	0.000397719	745	746	0.00034538	279	280	0.000350396	721	722	0.000388547	450	451	0.00022482	1561	1562	0.00216158	3170	3171	0.000898296	5231	5232	0.00113058	NA	NA	NA	NA	NA
AAHGYLNL	GCCGCACATGGGTACTTAAACCTA	WT	2075	2076	0.000557925	690	691	0.000510826	3813	3814	0.000609848	NA	NA	NA	NA	NA	NA	NA	NA	NA	1301	1302	0.000276767	523	524	0.000242599	203	204	0.000255288	1961	1962	0.00105586	1460	1461	0.000728296	280	281	0.000388863	1942	1943	0.000550423	1487	1488	0.000321541	NA	NA	NA	NA	NA
AAIFKLSL	GCGGCCATATTCAAACTGAGTCTT	WT	NA	1	2.6875e-07	NA	1	7.39256e-07	NA	1	1.59897e-07	NA	NA	NA	NA	NA	NA	NA	NA	NA	NA	1	2.1257e-07	NA	1	4.62976e-07	NA	1	1.25141e-06	NA	1	5.38154e-07	NA	1	4.98492e-07	NA	1	1.38386e-06	NA	1	2.83285e-07	NA	1	2.1609e-07	NA	NA	NA	NA	NA
AAKLYATV	GCTGCCAAACTGTATGCCACTGTC	WT	498	499	0.000134106	222	223	0.000164854	954	955	0.000152702	NA	NA	NA	NA	NA	NA	NA	NA	NA	304	305	6.4834e-05	141	142	6.57426e-05	59	60	7.50848e-05	137	138	7.42653e-05	8	9	4.48642e-06	3	4	5.53542e-06	1943	1944	0.000550706	52	53	1.14527e-05	NA	NA	NA	NA	NA
AALFFVSL	GCTGCGTTGTTCTTCGTATCTTTA	WT	2520	2521	0.000677519	843	844	0.000623932	4090	4091	0.000654139	NA	NA	NA	NA	NA	NA	NA	NA	NA	1600	1601	0.000340325	750	751	0.000347695	231	232	0.000290328	647	648	0.000348724	163	164	8.17526e-05	224	225	0.000311367	8633	8634	0.00244588	2564	2565	0.00055427	NA	NA	NA	NA	NA
AALFVLTL	GCCGCCCTGTTCGTCCTTACGCTC	WT	44	45	1.20937e-05	19	20	1.47851e-05	92	93	1.48704e-05	NA	NA	NA	NA	NA	NA	NA	NA	NA	33	34	7.22739e-06	17	18	8.33357e-06	7	8	1.00113e-05	NA	1	5.38154e-07	NA	1	4.98492e-07	10	11	1.52224e-05	NA	1	2.83285e-07	NA	1	2.1609e-07	NA	NA	NA	NA	NA
AALFWWNL	GCGGCGTTGTTTTGGTGGAATCTA	WT	4977	4978	0.00133784	1879	1880	0.0013898	9694	9695	0.0015502	NA	NA	NA	NA	NA	NA	NA	NA	NA	3431	3432	0.000729542	1386	1387	0.000642148	565	566	0.000708299	2543	2544	0.00136906	1718	1719	0.000856907	2096	2097	0.00290194	6380	6381	0.00180764	3228	3229	0.000697753	NA	NA	NA	NA	NA
AALGLALL	GCGGCTCTAGGACTAGCCCTACTA	WT	1671	1672	0.00044935	610	611	0.000451685	2796	2797	0.000447232	NA	NA	NA	NA	NA	NA	NA	NA	NA	970	971	0.000206406	408	409	0.000189357	170	171	0.000213992	240	241	0.000129695	438	439	0.000218838	55	56	7.74959e-05	57	58	1.64305e-05	548	549	0.000118633	NA	NA	NA	NA	NA
AALLLASL	GCCGCACTCCTCCTCGCGTCCCTA	WT	120	121	3.25187e-05	35	36	2.66132e-05	193	194	3.102e-05	NA	NA	NA	NA	NA	NA	NA	NA	NA	90	91	1.93439e-05	35	36	1.66671e-05	12	13	1.62684e-05	2	3	1.61446e-06	2	3	1.49547e-06	NA	1	1.38386e-06	22	23	6.51555e-06	NA	1	2.1609e-07	NA	NA	NA	NA	NA
AALLYRPV	GCAGCTCTGCTATATAGGCCCGTG	WT	684	685	0.000184094	246	247	0.000182596	1187	1188	0.000189958	NA	NA	NA	NA	NA	NA	NA	NA	NA	466	467	9.92704e-05	166	167	7.7317e-05	58	59	7.38333e-05	168	169	9.09481e-05	37	38	1.89427e-05	410	411	0.000568764	207	208	5.89233e-05	59	60	1.29654e-05	NA	NA	NA	NA	NA
AALRFSQL	GCCGCCCTCAGGTTCTCTCAACTG	WT	41	42	1.12875e-05	18	19	1.40459e-05	40	41	6.55578e-06	NA	NA	NA	NA	NA	NA	NA	NA	NA	19	20	4.25141e-06	14	15	6.94464e-06	4	5	6.25706e-06	1	2	1.07631e-06	NA	1	4.98492e-07	8	9	1.24547e-05	NA	1	2.83285e-07	7	8	1.72872e-06	NA	NA	NA	NA	NA
AALSRLAL	GCCGCGCTCTCGCGTCTGGCACTC	WT	403	404	0.000108575	142	143	0.000105714	647	648	0.000103613	NA	NA	NA	NA	NA	NA	NA	NA	NA	204	205	4.35769e-05	89	90	4.16678e-05	32	33	4.12966e-05	271	272	0.000146378	26	27	1.34593e-05	114	115	0.000159143	3	4	1.13314e-06	473	474	0.000102426	NA	NA	NA	NA	NA
AAMAFCFL	GCGGCAATGGCGTTTTGCTTTCTG	WT	1352	1353	0.000363619	447	448	0.000331187	2407	2408	0.000385032	NA	NA	NA	NA	NA	NA	NA	NA	NA	747	748	0.000159003	331	332	0.000153708	114	115	0.000143912	660	661	0.00035572	110	111	5.53326e-05	416	417	0.000577068	272	273	7.73368e-05	456	457	9.87529e-05	NA	NA	NA	NA	NA
AAMFSVSL	GCTGCTATGTTCTCCGTCTCTTTA	WT	1696	1697	0.000456069	707	708	0.000523393	2852	2853	0.000456186	NA	NA	NA	NA	NA	NA	NA	NA	NA	1102	1103	0.000234465	537	538	0.000249081	185	186	0.000232763	724	725	0.000390162	4237	4238	0.00211261	66	67	9.27183e-05	103	104	2.94616e-05	2228	2229	0.000481664	NA	NA	NA	NA	NA
AAMQHGPL	GCCGCTATGCAGCATGGTCCCCTA	WT	534	535	0.000143781	243	244	0.000180378	1021	1022	0.000163415	NA	NA	NA	NA	NA	NA	NA	NA	NA	389	390	8.29025e-05	167	168	7.778e-05	73	74	9.26045e-05	86	87	4.68194e-05	3045	3046	0.00151841	37	38	5.25865e-05	95	96	2.71954e-05	484	485	0.000104803	NA	NA	NA	NA	NA
AAMTVMHL	GCCGCCATGACCGTTATGCACTTA	WT	507	508	0.000136525	219	220	0.000162636	1156	1157	0.000185001	NA	NA	NA	NA	NA	NA	NA	NA	NA	310	311	6.61094e-05	167	168	7.778e-05	41	42	5.25593e-05	55	56	3.01366e-05	42	43	2.14351e-05	5	6	8.30313e-06	16	17	4.81584e-06	7	8	1.72872e-06	NA	NA	NA	NA	NA
AANPFFKL	GCCGCCAACCCATTCTTTAAGCTC	WT	920	921	0.000247519	360	361	0.000266871	1565	1566	0.000250399	NA	NA	NA	NA	NA	NA	NA	NA	NA	610	611	0.000129881	269	270	0.000125004	80	81	0.000101364	528	529	0.000284684	572	573	0.000285636	52	53	7.33443e-05	843	844	0.000239092	1090	1091	0.000235754	NA	NA	NA	NA	NA
AAPFSAFL	GCCGCACCATTCTCTGCATTTCTA	WT	2711	2712	0.00072885	979	980	0.000724471	4603	4604	0.000736166	NA	NA	NA	NA	NA	NA	NA	NA	NA	1729	1730	0.000367747	804	805	0.000372696	309	310	0.000387938	642	643	0.000346033	1621	1622	0.000808553	91	92	0.000127315	12414	12415	0.00351698	3126	3127	0.000675712	NA	NA	NA	NA	NA
AAPWYFPI	GCGGCTCCCTGGTATTTTCCAATC	WT	1497	1498	0.000402587	484	485	0.000358539	2582	2583	0.000413014	NA	NA	NA	NA	NA	NA	NA	NA	NA	911	912	0.000193864	423	424	0.000196302	153	154	0.000192718	292	293	0.000157679	175	176	8.77345e-05	242	243	0.000336277	499	500	0.000141642	13305	13306	0.00287529	NA	NA	NA	NA	NA
AAQDFCQL	GCTGCGCAGGACTTCTGTCAGTTA	WT	356	357	9.59437e-05	198	199	0.000147112	895	896	0.000143268	NA	NA	NA	NA	NA	NA	NA	NA	NA	288	289	6.14328e-05	113	114	5.27793e-05	62	63	7.8839e-05	643	644	0.000346571	7	8	3.98793e-06	1	2	2.76771e-06	85	86	2.43625e-05	189	190	4.1057e-05	NA	NA	NA	NA	NA
AAQKYEAL	GCTGCACAGAAATATGAGGCGCTA	WT	431	432	0.0001161	163	164	0.000121238	886	887	0.000141829	NA	NA	NA	NA	NA	NA	NA	NA	NA	237	238	5.05918e-05	119	120	5.55571e-05	57	58	7.25819e-05	3	4	2.15262e-06	5	6	2.99095e-06	4	5	6.91928e-06	14	15	4.24927e-06	481	482	0.000104155	NA	NA	NA	NA	NA
AAQMFFFV	GCCGCTCAGATGTTCTTCTTCGTG	WT	1849	1850	0.000497187	668	669	0.000494562	3063	3064	0.000489925	NA	NA	NA	NA	NA	NA	NA	NA	NA	1208	1209	0.000256998	532	533	0.000246766	191	192	0.000240271	2136	2137	0.00115004	858	859	0.000428204	242	243	0.000336277	654	655	0.000185552	1160	1161	0.00025088	NA	NA	NA	NA	NA
AARFVLSL	GCTGCCCGATTTGTACTCAGCCTA	WT	1086	1087	0.000292131	417	418	0.000309009	1974	1975	0.000315797	NA	NA	NA	NA	NA	NA	NA	NA	NA	786	787	0.000167293	302	303	0.000140282	126	127	0.000158929	443	444	0.000238941	165	166	8.27496e-05	88	89	0.000123163	170	171	4.84417e-05	705	706	0.000152559	NA	NA	NA	NA	NA
AARVFQSV	GCGGCTCGAGTATTTCAAAGTGTA	WT	1106	1107	0.000297506	409	410	0.000303095	2252	2253	0.000360248	NA	NA	NA	NA	NA	NA	NA	NA	NA	817	818	0.000173883	299	300	0.000138893	129	130	0.000162684	1275	1276	0.000686685	146	147	7.32783e-05	43	44	6.08896e-05	668	669	0.000189518	1122	1123	0.000242669	NA	NA	NA	NA	NA
AAVLSFSL	GCTGCTGTTCTGAGTTTCTCGCTC	WT	3506	3507	0.000942506	1348	1349	0.000997256	6249	6250	0.000999357	NA	NA	NA	NA	NA	NA	NA	NA	NA	2176	2177	0.000462766	1012	1013	0.000468995	399	400	0.000500565	1210	1211	0.000651705	491	492	0.000245258	194	195	0.000269852	3736	3737	0.00105864	3612	3613	0.000780731	NA	NA	NA	NA	NA
AAWCLHHI	GCAGCGTGGTGCTTACATCACATC	WT	306	307	8.25062e-05	139	140	0.000103496	712	713	0.000114007	NA	NA	NA	NA	NA	NA	NA	NA	NA	259	260	5.52683e-05	100	101	4.67606e-05	36	37	4.63023e-05	54	55	2.95985e-05	1	2	9.96983e-07	6	7	9.68699e-06	1	2	5.6657e-07	97	98	2.11768e-05	NA	NA	NA	NA	NA
AAWPFPVL	GCCGCCTGGCCTTTCCCTGTACTA	WT	41	42	1.12875e-05	13	14	1.03496e-05	93	94	1.50303e-05	NA	NA	NA	NA	NA	NA	NA	NA	NA	14	15	3.18856e-06	9	10	4.62976e-06	5	6	7.50848e-06	NA	1	5.38154e-07	NA	1	4.98492e-07	NA	1	1.38386e-06	NA	1	2.83285e-07	NA	1	2.1609e-07	NA	NA	NA	NA	NA
AAWTVRAL	GCCGCATGGACGGTTAGGGCCCTA	WT	213	214	5.75125e-05	66	67	4.95301e-05	238	239	3.82154e-05	NA	NA	NA	NA	NA	NA	NA	NA	NA	130	131	2.78467e-05	37	38	1.75931e-05	12	13	1.62684e-05	1	2	1.07631e-06	1134	1135	0.000565788	4	5	6.91928e-06	23	24	6.79884e-06	41	42	9.07576e-06	NA	NA	NA	NA	NA
AAYEFRVI	GCTGCATATGAGTTTCGGGTTATC	WT	2078	2079	0.000558731	731	732	0.000541135	3533	3534	0.000565076	NA	NA	NA	NA	NA	NA	NA	NA	NA	1274	1275	0.000271027	599	600	0.000277786	211	212	0.000265299	364	365	0.000196426	709	710	0.000353929	22	23	3.18287e-05	1099	1100	0.000311613	618	619	0.000133759	NA	NA	NA	NA	NA
AAYFGFSV	GCGGCCTATTTTGGATTTAGCGTG	WT	691	692	0.000185975	271	272	0.000201078	1134	1135	0.000181483	NA	NA	NA	NA	NA	NA	NA	NA	NA	388	389	8.26899e-05	188	189	8.75025e-05	69	70	8.75989e-05	103	104	5.59681e-05	476	477	0.00023778	NA	1	1.38386e-06	224	225	6.37391e-05	508	509	0.00010999	NA	NA	NA	NA	NA
AAYFLAAC	GCGGCCTATTTTCTCGCAGCCTGT	WT	582	583	0.000156681	220	221	0.000163376	1085	1086	0.000173648	NA	NA	NA	NA	NA	NA	NA	NA	NA	388	389	8.26899e-05	192	193	8.93544e-05	76	77	9.63588e-05	41	42	2.26025e-05	24	25	1.24623e-05	408	409	0.000565997	91	92	2.60622e-05	75	76	1.64228e-05	NA	NA	NA	NA	NA
AAYLSKSL	GCAGCTTACCTAAGTAAAAGCTTG	WT	585	586	0.000157487	239	240	0.000177421	974	975	0.0001559	NA	NA	NA	NA	NA	NA	NA	NA	NA	365	366	7.78008e-05	146	147	6.80575e-05	64	65	8.13418e-05	77	78	4.1976e-05	77	78	3.88823e-05	4	5	6.91928e-06	22	23	6.51555e-06	452	453	9.78885e-05	NA	NA	NA	NA	NA
ACLNFLKL	GCTTGCCTGAACTTTCTCAAACTT	WT	2174	2175	0.000584531	722	723	0.000534482	3844	3845	0.000614804	NA	NA	NA	NA	NA	NA	NA	NA	NA	1235	1236	0.000262737	644	645	0.00029862	222	223	0.000279065	82	83	4.46668e-05	2403	2404	0.00119837	1260	1261	0.00174504	1702	1703	0.000482434	930	931	0.000201179	NA	NA	NA	NA	NA
ACTFFFHL	GCTTGTACATTCTTCTTTCATCTC	WT	10892	10893	0.00292749	3566	3567	0.00263692	15827	15828	0.00253085	NA	NA	NA	NA	NA	NA	NA	NA	NA	6005	6006	0.0012767	3029	3030	0.00140282	1055	1056	0.00132149	4220	4221	0.00227155	5971	5972	0.00297699	1417	1418	0.00196231	22558	22559	0.00639062	22878	22879	0.00494391	NA	NA	NA	NA	NA
ADYVFTSI	GCAGACTATGTCTTTACCAGCATC	WT	759	760	0.00020425	260	261	0.000192946	1215	1216	0.000194435	NA	NA	NA	NA	NA	NA	NA	NA	NA	427	428	9.09801e-05	253	254	0.000117596	72	73	9.13531e-05	123	124	6.67311e-05	1221	1222	0.000609157	49	50	6.91928e-05	676	677	0.000191784	409	410	8.85967e-05	NA	NA	NA	NA	NA
AEYVFADL	GCTGAATATGTGTTCGCAGATCTA	WT	666	667	0.000179256	293	294	0.000217341	1480	1481	0.000236808	NA	NA	NA	NA	NA	NA	NA	NA	NA	469	470	9.99081e-05	183	184	8.51876e-05	74	75	9.38559e-05	125	126	6.78074e-05	189	190	9.47134e-05	72	73	0.000101021	6	7	1.98299e-06	5093	5094	0.00110076	NA	NA	NA	NA	NA
AFAFHSYL	GCTTTTGCATTTCATAGCTATTTG	WT	1880	1881	0.000505519	583	584	0.000431725	2769	2770	0.000442915	NA	NA	NA	NA	NA	NA	NA	NA	NA	1051	1052	0.000223624	515	516	0.000238896	178	179	0.000224003	311	312	0.000167904	1005	1006	0.000501483	104	105	0.000145305	3021	3022	0.000856087	2171	2172	0.000469346	NA	NA	NA	NA	NA
AFAFSALF	GCATTTGCCTTCAGCGCTCTATTT	WT	325	326	8.76125e-05	118	119	8.79714e-05	550	551	8.81033e-05	NA	NA	NA	NA	NA	NA	NA	NA	NA	228	229	4.86786e-05	122	123	5.69461e-05	42	43	5.38107e-05	242	243	0.000130772	6	7	3.48944e-06	47	48	6.6425e-05	174	175	4.95749e-05	309	310	6.69877e-05	NA	NA	NA	NA	NA
AFCTFLAL	GCCTTCTGCACGTTTCTAGCTTTA	WT	1680	1681	0.000451769	578	579	0.000428029	2442	2443	0.000390629	NA	NA	NA	NA	NA	NA	NA	NA	NA	1032	1033	0.000219585	457	458	0.000212043	167	168	0.000210237	717	718	0.000386395	254	255	0.000127115	353	354	0.000489885	918	919	0.000260339	868	869	0.000187782	NA	NA	NA	NA	NA
AFFFAGTV	GCTTTCTTCTTTGCCGGTACGGTT	WT	951	952	0.00025585	279	280	0.000206992	1381	1382	0.000220978	NA	NA	NA	NA	NA	NA	NA	NA	NA	581	582	0.000123716	258	259	0.000119911	98	99	0.00012389	10006	10007	0.00538531	84	85	4.23718e-05	219	220	0.000304448	27	28	7.93198e-06	2118	2119	0.000457894	NA	NA	NA	NA	NA
AFFSFAPL	GCTTTCTTTAGTTTTGCACCGCTG	WT	600	601	0.000161519	188	189	0.000139719	956	957	0.000153022	NA	NA	NA	NA	NA	NA	NA	NA	NA	415	416	8.84293e-05	182	183	8.47246e-05	55	56	7.00791e-05	572	573	0.000308362	57	58	2.89125e-05	118	119	0.000164679	223	224	6.34558e-05	133	134	2.8956e-05	NA	NA	NA	NA	NA
AFFSHPFL	GCGTTCTTTTCCCACCCGTTCTTG	WT	658	659	0.000177106	235	236	0.000174464	1064	1065	0.00017029	NA	NA	NA	NA	NA	NA	NA	NA	NA	379	380	8.07767e-05	188	189	8.75025e-05	52	53	6.63249e-05	71	72	3.87471e-05	839	840	0.000418733	12	13	1.79901e-05	803	804	0.000227761	836	837	0.000180867	NA	NA	NA	NA	NA
AFFSWNRI	GCTTTCTTCTCATGGAACCGGATA	WT	947	948	0.000254775	272	273	0.000201817	1535	1536	0.000245602	NA	NA	NA	NA	NA	NA	NA	NA	NA	571	572	0.00012159	301	302	0.000139819	98	99	0.00012389	346	347	0.00018674	425	426	0.000212357	1	2	2.76771e-06	421	422	0.000119546	180	181	3.91122e-05	NA	NA	NA	NA	NA
AFFVLVPL	GCCTTCTTTGTATTAGTCCCTTTA	WT	1963	1964	0.000527825	663	664	0.000490866	2848	2849	0.000455547	NA	NA	NA	NA	NA	NA	NA	NA	NA	1184	1185	0.000251896	568	569	0.000263433	178	179	0.000224003	286	287	0.00015445	711	712	0.000354926	916	917	0.001269	2863	2864	0.000811328	938	939	0.000202908	NA	NA	NA	NA	NA
AFGYLLPI	GCGTTTGGTTATCTCCTCCCCATA	WT	2336	2337	0.000628069	857	858	0.000634281	3738	3739	0.000597855	NA	NA	NA	NA	NA	NA	NA	NA	NA	1545	1546	0.000328634	651	652	0.00030186	235	236	0.000295333	421	422	0.000227101	358	359	0.000178958	4798	4799	0.00664112	983	984	0.000278752	761	762	0.00016466	NA	NA	NA	NA	NA
AFIAFANL	GCGTTCATAGCATTCGCTAACTTA	WT	3398	3399	0.000913481	1145	1146	0.000847187	5555	5556	0.000888388	NA	NA	NA	NA	NA	NA	NA	NA	NA	2105	2106	0.000447673	929	930	0.000430568	329	330	0.000412966	2030	2031	0.00109299	1292	1293	0.00064455	341	342	0.000473278	2406	2407	0.000681867	8758	8759	0.00189273	NA	NA	NA	NA	NA
AFKALAPL	GCCTTCAAGGCTCTAGCGCCCTTG	WT	290	291	7.82062e-05	102	103	7.61433e-05	627	628	0.000100415	NA	NA	NA	NA	NA	NA	NA	NA	NA	195	196	4.16638e-05	115	116	5.37052e-05	25	26	3.25367e-05	25	26	1.3992e-05	6	7	3.48944e-06	NA	1	1.38386e-06	4	5	1.41642e-06	146	147	3.17652e-05	NA	NA	NA	NA	NA
AFLFYGLL	GCATTCCTGTTTTACGGATTGCTA	WT	1039	1040	0.0002795	360	361	0.000266871	1757	1758	0.000281099	NA	NA	NA	NA	NA	NA	NA	NA	NA	665	666	0.000141572	320	321	0.000148615	94	95	0.000118884	269	270	0.000145302	446	447	0.000222826	30	31	4.28995e-05	1514	1515	0.000429177	1650	1651	0.000356764	NA	NA	NA	NA	NA
AFLYLALM	GCATTCTTGTATCTTGCGTTAATG	WT	5989	5990	0.00160981	2189	2190	0.00161897	10184	10185	0.00162855	NA	NA	NA	NA	NA	NA	NA	NA	NA	3562	3563	0.000757388	1623	1624	0.000751873	597	598	0.000748345	2326	2327	0.00125229	5983	5984	0.00298297	484	485	0.00067117	2815	2816	0.00079773	5721	5722	0.00123646	NA	NA	NA	NA	NA
AFQFWIHL	GCGTTCCAATTTTGGATCCATTTG	WT	923	924	0.000248325	353	354	0.000261697	1745	1746	0.00027918	NA	NA	NA	NA	NA	NA	NA	NA	NA	691	692	0.000147099	298	299	0.00013843	103	104	0.000130147	652	653	0.000351415	9	10	4.98492e-06	512	513	0.000709918	233	234	6.62887e-05	1183	1184	0.00025585	NA	NA	NA	NA	NA
AFQMFLAL	GCGTTTCAGATGTTTCTAGCCCTG	WT	990	991	0.000266331	363	364	0.000269089	1860	1861	0.000297569	NA	NA	NA	NA	NA	NA	NA	NA	NA	617	618	0.000131369	293	294	0.000136115	114	115	0.000143912	77	78	4.1976e-05	26	27	1.34593e-05	239	240	0.000332125	1058	1059	0.000299999	1119	1120	0.00024202	NA	NA	NA	NA	NA
AFRFLSPL	GCATTCAGGTTCCTGTCCCCGTTA	WT	285	286	7.68625e-05	129	130	9.61032e-05	634	635	0.000101535	NA	NA	NA	NA	NA	NA	NA	NA	NA	274	275	5.84569e-05	108	109	5.04644e-05	23	24	3.00339e-05	5	6	3.22893e-06	5	6	2.99095e-06	55	56	7.74959e-05	44	45	1.27478e-05	97	98	2.11768e-05	NA	NA	NA	NA	NA
AFRHHSYL	GCCTTCCGGCATCACTCTTACTTA	WT	2007	2008	0.00053965	713	714	0.000527829	3358	3359	0.000537094	NA	NA	NA	NA	NA	NA	NA	NA	NA	1214	1215	0.000258273	596	597	0.000276397	237	238	0.000297836	553	554	0.000298138	1062	1063	0.000529897	43	44	6.08896e-05	1853	1854	0.00052521	838	839	0.000181299	NA	NA	NA	NA	NA
AFRHSSSL	GCTTTTAGGCACTCGTCCAGTCTG	WT	351	352	9.46e-05	100	101	7.46648e-05	641	642	0.000102654	NA	NA	NA	NA	NA	NA	NA	NA	NA	206	207	4.40021e-05	68	69	3.19453e-05	32	33	4.12966e-05	96	97	5.2201e-05	72	73	3.63899e-05	23	24	3.32125e-05	115	116	3.28611e-05	24	25	5.40224e-06	NA	NA	NA	NA	NA
AFSQHSNL	GCGTTCTCACAGCACAGTAACCTC	WT	1226	1227	0.000329756	524	525	0.000388109	2175	2176	0.000347936	NA	NA	NA	NA	NA	NA	NA	NA	NA	746	747	0.00015879	294	295	0.000136578	122	123	0.000153924	256	257	0.000138306	355	356	0.000177463	107	108	0.000149456	177	178	5.04247e-05	1882	1883	0.000406897	NA	NA	NA	NA	NA
AFSQYSVL	GCTTTCTCTCAATATTCAGTGTTG	WT	2005	2006	0.000539112	666	667	0.000493084	3332	3333	0.000532937	NA	NA	NA	NA	NA	NA	NA	NA	NA	1186	1187	0.000252321	552	553	0.000256026	214	215	0.000269054	2458	2459	0.00132332	917	918	0.000457615	172	173	0.000239407	997	998	0.000282718	1612	1613	0.000348552	NA	NA	NA	NA	NA
AFTNYSTL	GCCTTCACCAATTACTCAACACTC	WT	2279	2280	0.00061275	793	794	0.000586969	3808	3809	0.000609048	NA	NA	NA	NA	NA	NA	NA	NA	NA	1598	1599	0.0003399	707	708	0.000327787	238	239	0.000299088	665	666	0.000358411	688	689	0.000343461	26	27	3.73641e-05	1809	1810	0.000512746	1113	1114	0.000240724	NA	NA	NA	NA	NA
AFTWQSQL	GCTTTCACGTGGCAGTCTCAGCTC	WT	701	702	0.000188662	249	250	0.000184814	1231	1232	0.000196993	NA	NA	NA	NA	NA	NA	NA	NA	NA	441	442	9.39561e-05	203	204	9.44471e-05	81	82	0.000102616	47	48	2.58314e-05	35	36	1.79457e-05	1	2	2.76771e-06	91	92	2.60622e-05	183	184	3.97605e-05	NA	NA	NA	NA	NA
AFTYLSAL	GCGTTTACATATCTCAGTGCACTA	WT	1775	1776	0.0004773	641	642	0.000474602	3189	3190	0.000510072	NA	NA	NA	NA	NA	NA	NA	NA	NA	1189	1190	0.000252959	492	493	0.000228247	204	205	0.00025654	144	145	7.80324e-05	241	242	0.000120635	45	46	6.36573e-05	1470	1471	0.000416712	366	367	7.93048e-05	NA	NA	NA	NA	NA
AFTYPASL	GCCTTTACGTATCCAGCATCTCTC	WT	1863	1864	0.00050095	629	630	0.000465731	2953	2954	0.000472336	NA	NA	NA	NA	NA	NA	NA	NA	NA	1207	1208	0.000256785	487	488	0.000225932	189	190	0.000237768	952	953	0.000512861	39	40	1.99397e-05	444	445	0.000615816	135	136	3.85267e-05	1223	1224	0.000264494	NA	NA	NA	NA	NA
AFVHFLGI	GCTTTTGTACACTTTCTTGGTATC	WT	3685	3686	0.000990612	1229	1230	0.000909284	5804	5805	0.000928203	NA	NA	NA	NA	NA	NA	NA	NA	NA	2064	2065	0.000438958	1043	1044	0.000483347	326	327	0.000409212	2073	2074	0.00111613	3953	3954	0.00197104	222	223	0.0003086	4432	4433	0.0012558	2694	2695	0.000582361	NA	NA	NA	NA	NA
AFVYLSKL	GCTTTCGTTTATCTCTCTAAGTTG	WT	1165	1166	0.000313362	347	348	0.000257261	1913	1914	0.000306043	NA	NA	NA	NA	NA	NA	NA	NA	NA	754	755	0.000160491	350	351	0.000162505	110	111	0.000138907	540	541	0.000291141	739	740	0.000368884	111	112	0.000154992	319	320	9.06512e-05	2047	2048	0.000442551	NA	NA	NA	NA	NA
AFYFSATV	GCGTTTTATTTCTCTGCAACTGTC	WT	894	895	0.000240531	311	312	0.000230648	1513	1514	0.000242084	NA	NA	NA	NA	NA	NA	NA	NA	NA	556	557	0.000118402	256	257	0.000118985	69	70	8.75989e-05	152	153	8.23376e-05	124	125	6.23114e-05	27	28	3.87479e-05	165	166	4.70253e-05	216	217	4.68914e-05	NA	NA	NA	NA	NA
AGALFVHI	GCGGGAGCCCTCTTTGTACATATT	WT	2168	2169	0.000582919	732	733	0.000541874	3568	3569	0.000570673	NA	NA	NA	NA	NA	NA	NA	NA	NA	1356	1357	0.000288458	626	627	0.000290286	255	256	0.000320362	200	201	0.000108169	287	288	0.000143566	94	95	0.000131466	656	657	0.000186118	2324	2325	0.000502408	NA	NA	NA	NA	NA
AGFALQNI	GCCGGGTTTGCCCTTCAAAACATA	WT	246	247	6.63812e-05	69	70	5.17479e-05	400	401	6.41187e-05	NA	NA	NA	NA	NA	NA	NA	NA	NA	156	157	3.33736e-05	63	64	2.96305e-05	17	18	2.25254e-05	41	42	2.26025e-05	24	25	1.24623e-05	638	639	0.000884283	4	5	1.41642e-06	42	43	9.29185e-06	NA	NA	NA	NA	NA
AGFFRFFA	GCAGGATTCTTTCGTTTCTTTGCG	WT	2369	2370	0.000636937	766	767	0.000567009	3540	3541	0.000566196	NA	NA	NA	NA	NA	NA	NA	NA	NA	1372	1373	0.000291859	657	658	0.000304638	253	254	0.000317859	713	714	0.000384242	225	226	0.000112659	155	156	0.000215881	1487	1488	0.000421528	2068	2069	0.000447089	NA	NA	NA	NA	NA
AGFLYTIL	GCAGGTTTTCTCTACACGATCCTT	WT	978	979	0.000263106	281	282	0.00020847	1398	1399	0.000223696	NA	NA	NA	NA	NA	NA	NA	NA	NA	582	583	0.000123929	229	230	0.000106484	83	84	0.000105119	412	413	0.000222258	87	88	4.38673e-05	374	375	0.000518946	70	71	2.01132e-05	76	77	1.66389e-05	NA	NA	NA	NA	NA
AGFQFPFT	GCTGGTTTCCAGTTCCCCTTTACT	WT	861	862	0.000231662	275	276	0.000204035	1373	1374	0.000219699	NA	NA	NA	NA	NA	NA	NA	NA	NA	475	476	0.000101184	219	220	0.000101855	94	95	0.000118884	206	207	0.000111398	33	34	1.69487e-05	33	34	4.70511e-05	157	158	4.4759e-05	1517	1518	0.000328024	NA	NA	NA	NA	NA
AGFRALGL	GCGGGTTTCAGGGCTCTAGGTTTG	WT	557	558	0.000149962	204	205	0.000151547	921	922	0.000147425	NA	NA	NA	NA	NA	NA	NA	NA	NA	315	316	6.71722e-05	155	156	7.22243e-05	57	58	7.25819e-05	45	46	2.47551e-05	32	33	1.64502e-05	44	45	6.22735e-05	14658	14659	0.00415267	69	70	1.51263e-05	NA	NA	NA	NA	NA
AGHRFPEL	GCTGGGCATAGGTTTCCAGAATTG	WT	1821	1822	0.000489662	763	764	0.000564791	3511	3512	0.000561559	NA	NA	NA	NA	NA	NA	NA	NA	NA	1232	1233	0.000262099	532	533	0.000246766	204	205	0.00025654	513	514	0.000276611	1631	1632	0.000813538	87	88	0.000121779	1933	1934	0.000547873	355	356	7.69279e-05	NA	NA	NA	NA	NA
AGHVLAAL	GCGGGGCACGTTCTTGCGGCTCTC	WT	385	386	0.000103737	122	123	9.09284e-05	617	618	9.88164e-05	NA	NA	NA	NA	NA	NA	NA	NA	NA	206	207	4.40021e-05	91	92	4.25938e-05	35	36	4.50509e-05	112	113	6.08114e-05	44	45	2.24321e-05	14	15	2.07578e-05	20	21	5.94898e-06	341	342	7.39026e-05	NA	NA	NA	NA	NA
AGIFYFIL	GCGGGAATATTCTATTTCATTCTG	WT	1133	1134	0.000304762	347	348	0.000257261	2007	2008	0.000321073	NA	NA	NA	NA	NA	NA	NA	NA	NA	653	654	0.000139021	316	317	0.000146763	100	101	0.000126393	237	238	0.000128081	178	179	8.923e-05	1209	1210	0.00167446	3334	3335	0.000944755	2265	2266	0.000489659	NA	NA	NA	NA	NA
AGLIYASI	GCTGGACTCATATATGCTTCGATC	WT	1217	1218	0.000327337	524	525	0.000388109	2124	2125	0.000339781	NA	NA	NA	NA	NA	NA	NA	NA	NA	739	740	0.000157302	326	327	0.000151393	124	125	0.000156427	661	662	0.000356258	781	782	0.00038982	38	39	5.39703e-05	122	123	3.4844e-05	3369	3370	0.000728222	NA	NA	NA	NA	NA
AGMTFTTF	GCAGGTATGACCTTTACCACTTTC	WT	505	506	0.000135987	206	207	0.000153026	828	829	0.000132555	NA	NA	NA	NA	NA	NA	NA	NA	NA	320	321	6.82351e-05	133	134	6.20388e-05	41	42	5.25593e-05	578	579	0.000311591	27	28	1.39578e-05	46	47	6.50412e-05	62	63	1.78469e-05	79	80	1.72872e-05	NA	NA	NA	NA	NA
AGPHFVAV	GCGGGTCCTCACTTTGTCGCGGTG	WT	88	89	2.39187e-05	38	39	2.8831e-05	240	241	3.85352e-05	NA	NA	NA	NA	NA	NA	NA	NA	NA	65	66	1.40296e-05	29	30	1.38893e-05	17	18	2.25254e-05	1	2	1.07631e-06	112	113	5.63295e-05	22	23	3.18287e-05	NA	1	2.83285e-07	NA	1	2.1609e-07	NA	NA	NA	NA	NA
AGRLFVSV	GCAGGTCGCTTATTTGTAAGCGTC	WT	428	429	0.000115294	150	151	0.000111628	762	763	0.000122001	NA	NA	NA	NA	NA	NA	NA	NA	NA	298	299	6.35585e-05	106	107	4.95384e-05	36	37	4.63023e-05	388	389	0.000209342	458	459	0.000228808	597	598	0.000827545	3	4	1.13314e-06	58	59	1.27493e-05	NA	NA	NA	NA	NA
AGRPWALL	GCGGGACGGCCTTGGGCGCTGCTC	WT	62	63	1.69312e-05	32	33	2.43954e-05	139	140	2.23856e-05	NA	NA	NA	NA	NA	NA	NA	NA	NA	96	97	2.06193e-05	18	19	8.79654e-06	9	10	1.25141e-05	NA	1	5.38154e-07	3	4	1.99397e-06	NA	1	1.38386e-06	1	2	5.6657e-07	296	297	6.41786e-05	NA	NA	NA	NA	NA
AGRRYLGI	GCAGGTCGTCGATATCTTGGTATA	WT	1095	1096	0.00029455	438	439	0.000324533	2177	2178	0.000348256	NA	NA	NA	NA	NA	NA	NA	NA	NA	730	731	0.000155389	323	324	0.000150004	152	153	0.000191466	95	96	5.16628e-05	51	52	2.59216e-05	398	399	0.000552158	792	793	0.000224645	8927	8928	0.00192925	NA	NA	NA	NA	NA
AGSLFPLL	GCTGGGTCCCTGTTCCCGCTATTA	WT	82	83	2.23062e-05	26	27	1.99599e-05	152	153	2.44643e-05	NA	NA	NA	NA	NA	NA	NA	NA	NA	52	53	1.12662e-05	17	18	8.33357e-06	5	6	7.50848e-06	NA	1	5.38154e-07	1	2	9.96983e-07	NA	1	1.38386e-06	NA	1	2.83285e-07	339	340	7.34704e-05	NA	NA	NA	NA	NA
AGVLLATL	GCAGGTGTGCTGCTAGCAACGCTC	WT	247	248	6.665e-05	91	92	6.80115e-05	375	376	6.01213e-05	NA	NA	NA	NA	NA	NA	NA	NA	NA	154	155	3.29484e-05	47	48	2.22228e-05	31	32	4.00452e-05	325	326	0.000175438	NA	1	4.98492e-07	1	2	2.76771e-06	3971	3972	0.00112521	358	359	7.75761e-05	NA	NA	NA	NA	NA
AGVRYLDL	GCCGGTGTCCGTTATCTTGATTTA	WT	1122	1123	0.000301806	359	360	0.000266132	1729	1730	0.000276622	NA	NA	NA	NA	NA	NA	NA	NA	NA	681	682	0.000144973	307	308	0.000142597	108	109	0.000136404	87	88	4.73576e-05	552	553	0.000275666	18	19	2.62932e-05	423	424	0.000120113	562	563	0.000121658	NA	NA	NA	NA	NA
AGWAQAVL	GCGGGCTGGGCGCAAGCTGTTTTG	WT	145	146	3.92375e-05	82	83	6.13582e-05	236	237	3.78956e-05	NA	NA	NA	NA	NA	NA	NA	NA	NA	113	114	2.4233e-05	59	60	2.77786e-05	11	12	1.5017e-05	NA	1	5.38154e-07	2	3	1.49547e-06	47	48	6.6425e-05	8	9	2.54956e-06	7	8	1.72872e-06	NA	NA	NA	NA	NA
AGWQFKPM	GCAGGATGGCAGTTTAAACCAATG	WT	268	269	7.22937e-05	158	159	0.000117542	755	756	0.000120882	NA	NA	NA	NA	NA	NA	NA	NA	NA	200	201	4.27266e-05	95	96	4.44457e-05	27	28	3.50396e-05	9	10	5.38154e-06	8	9	4.48642e-06	1	2	2.76771e-06	11	12	3.39942e-06	1251	1252	0.000270544	NA	NA	NA	NA	NA
AGWVVGSL	GCGGGATGGGTTGTTGGGTCTTTA	WT	670	671	0.000180331	258	259	0.000191467	1293	1294	0.000206907	NA	NA	NA	NA	NA	NA	NA	NA	NA	411	412	8.7579e-05	208	209	9.6762e-05	74	75	9.38559e-05	386	387	0.000208266	240	241	0.000120136	47	48	6.6425e-05	34	35	9.91497e-06	1229	1230	0.00026579	NA	NA	NA	NA	NA
AGYFHKAV	GCCGGGTATTTTCATAAAGCGGTC	WT	1698	1699	0.000456606	604	605	0.00044725	3379	3380	0.000540452	NA	NA	NA	NA	NA	NA	NA	NA	NA	1218	1219	0.000259123	512	513	0.000237507	166	167	0.000208986	564	565	0.000304057	46	47	2.34291e-05	74	75	0.000103789	3219	3220	0.000912177	616	617	0.000133327	NA	NA	NA	NA	NA
AGYFYNGT	GCGGGTTATTTCTATAATGGTACG	WT	663	664	0.00017845	223	224	0.000165593	1164	1165	0.00018628	NA	NA	NA	NA	NA	NA	NA	NA	NA	404	405	8.6091e-05	194	195	9.02803e-05	94	95	0.000118884	157	158	8.50284e-05	5	6	2.99095e-06	8	9	1.24547e-05	418	419	0.000118696	370	371	8.01692e-05	NA	NA	NA	NA	NA
AGYHMECL	GCCGGATATCATATGGAATGCCTG	WT	783	784	0.0002107	295	296	0.00021882	1441	1442	0.000230572	NA	NA	NA	NA	NA	NA	NA	NA	NA	561	562	0.000119465	198	199	9.21322e-05	76	77	9.63588e-05	49	50	2.69077e-05	573	574	0.000286134	3	4	5.53542e-06	3382	3383	0.000958353	110	111	2.39859e-05	NA	NA	NA	NA	NA
AGYIPLNL	GCAGGGTACATCCCGTTAAACCTC	WT	812	813	0.000218494	308	309	0.00022843	1379	1380	0.000220658	NA	NA	NA	NA	NA	NA	NA	NA	NA	442	443	9.41687e-05	177	178	8.24097e-05	68	69	8.63475e-05	545	546	0.000293832	19	20	9.96983e-06	3	4	5.53542e-06	533	534	0.000151274	2000	2001	0.000432395	NA	NA	NA	NA	NA
AGYPMGPF	GCAGGTTACCCAATGGGCCCTTTT	WT	395	396	0.000106425	137	138	0.000102017	481	482	7.70704e-05	NA	NA	NA	NA	NA	NA	NA	NA	NA	204	205	4.35769e-05	100	101	4.67606e-05	23	24	3.00339e-05	40	41	2.20643e-05	9	10	4.98492e-06	24	25	3.45964e-05	478	479	0.000135693	1	2	4.32179e-07	NA	NA	NA	NA	NA
AGYRKCSV	GCTGGTTATCGTAAATGCTCCGTC	WT	2900	2901	0.000779644	1016	1017	0.000751823	5419	5420	0.000866642	NA	NA	NA	NA	NA	NA	NA	NA	NA	1822	1823	0.000387516	796	797	0.000368992	330	331	0.000414218	225	226	0.000121623	576	577	0.00028763	247	248	0.000343196	377	378	0.000107082	4940	4941	0.0010677	NA	NA	NA	NA	NA
AGYTYCGS	GCTGGCTATACATATTGCGGTTCG	WT	3315	3316	0.000891175	1310	1311	0.000969164	6036	6037	0.000965299	NA	NA	NA	NA	NA	NA	NA	NA	NA	2060	2061	0.000438108	846	847	0.000392141	288	289	0.000361658	1451	1452	0.0007814	1293	1294	0.000645048	156	157	0.000217265	9411	9412	0.00266628	11386	11387	0.00246061	NA	NA	NA	NA	NA
AHFLAKSL	GCACACTTCCTCGCCAAGAGCCTC	WT	52	53	1.42437e-05	11	12	8.87107e-06	56	57	9.11413e-06	NA	NA	NA	NA	NA	NA	NA	NA	NA	28	29	6.16454e-06	17	18	8.33357e-06	6	7	8.75989e-06	479	480	0.000258314	NA	1	4.98492e-07	NA	1	1.38386e-06	NA	1	2.83285e-07	12	13	2.80916e-06	NA	NA	NA	NA	NA
AHITFAIL	GCCCACATTACCTTCGCTATTCTA	WT	898	899	0.000241606	322	323	0.00023878	1318	1319	0.000210904	NA	NA	NA	NA	NA	NA	NA	NA	NA	563	564	0.00011989	265	266	0.000123152	77	78	9.76102e-05	76	77	4.14379e-05	135	136	6.77949e-05	14	15	2.07578e-05	232	233	6.60054e-05	483	484	0.000104587	NA	NA	NA	NA	NA
AHKFFLFL	GCGCACAAATTCTTTCTCTTTCTC	WT	4801	4802	0.00129054	1603	1604	0.00118577	7414	7415	0.00118564	NA	NA	NA	NA	NA	NA	NA	NA	NA	2733	2734	0.000581167	1317	1318	0.000610202	443	444	0.000555627	1380	1381	0.000743191	2738	2739	0.00136537	1709	1710	0.00236639	7957	7958	0.00225438	4162	4163	0.000899581	NA	NA	NA	NA	NA
AHPLYLLL	GCTCACCCTCTGTACTTGCTACTA	WT	241	242	6.50375e-05	89	90	6.6533e-05	387	388	6.20401e-05	NA	NA	NA	NA	NA	NA	NA	NA	NA	101	102	2.16822e-05	62	63	2.91675e-05	18	19	2.37768e-05	6	7	3.76708e-06	121	122	6.0816e-05	NA	1	1.38386e-06	9	10	2.83285e-06	70	71	1.53424e-05	NA	NA	NA	NA	NA
AIATYWAL	GCCATAGCTACCTATTGGGCTCTA	WT	545	546	0.000146737	213	214	0.000158201	932	933	0.000149184	NA	NA	NA	NA	NA	NA	NA	NA	NA	276	277	5.8882e-05	145	146	6.75945e-05	55	56	7.00791e-05	233	234	0.000125928	243	244	0.000121632	9	10	1.38386e-05	3	4	1.13314e-06	44	45	9.72403e-06	NA	NA	NA	NA	NA
AICYISYL	GCAATTTGCTATATATCATACTTA	WT	1074	1075	0.000288906	469	470	0.00034745	2023	2024	0.000323632	NA	NA	NA	NA	NA	NA	NA	NA	NA	696	697	0.000148162	302	303	0.000140282	135	136	0.000170192	358	359	0.000193197	134	135	6.72964e-05	198	199	0.000275387	314	315	8.92347e-05	1359	1360	0.000293882	NA	NA	NA	NA	NA
AIESFALM	GCAATTGAGTCCTTCGCATTGATG	WT	1677	1678	0.000450962	571	572	0.000422854	3130	3131	0.000500638	NA	NA	NA	NA	NA	NA	NA	NA	NA	989	990	0.000210445	403	404	0.000187042	190	191	0.00023902	646	647	0.000348186	36	37	1.84442e-05	91	92	0.000127315	1031	1032	0.00029235	206	207	4.47305e-05	NA	NA	NA	NA	NA
AIFFGKFL	GCGATCTTCTTTGGCAAGTTCCTT	WT	1412	1413	0.000379744	562	563	0.000416201	2352	2353	0.000376238	NA	NA	NA	NA	NA	NA	NA	NA	NA	779	780	0.000165805	399	400	0.00018519	159	160	0.000200226	151	152	8.17995e-05	1038	1039	0.000517933	72	73	0.000101021	733	734	0.000207931	3230	3231	0.000698185	NA	NA	NA	NA	NA
AIFGYLTF	GCAATATTCGGGTATCTTACATTT	WT	8234	8235	0.00221316	2841	2842	0.00210096	13397	13398	0.0021423	NA	NA	NA	NA	NA	NA	NA	NA	NA	4928	4929	0.00104776	2330	2331	0.0010792	882	883	0.001105	2833	2834	0.00152513	2247	2248	0.00112061	2185	2186	0.00302511	3943	3944	0.00111728	6229	6230	0.00134624	NA	NA	NA	NA	NA
AIFLPPNL	GCCATCTTCTTGCCACCGAATCTC	WT	827	828	0.000222525	315	316	0.000233605	1365	1366	0.000218419	NA	NA	NA	NA	NA	NA	NA	NA	NA	497	498	0.00010586	265	266	0.000123152	96	97	0.000121387	354	355	0.000191045	51	52	2.59216e-05	164	165	0.000228336	297	298	8.44189e-05	98	99	2.13929e-05	NA	NA	NA	NA	NA
AIFLRNLM	GCTATCTTCCTGAGGAATCTCATG	WT	2271	2272	0.0006106	791	792	0.00058549	4000	4001	0.000639748	NA	NA	NA	NA	NA	NA	NA	NA	NA	1363	1364	0.000289946	706	707	0.000327324	262	263	0.000329121	315	316	0.000170057	1320	1321	0.000658507	851	852	0.00117904	835	836	0.000236826	7084	7085	0.00153099	NA	NA	NA	NA	NA
AIFQHWVL	GCGATCTTCCAGCATTGGGTACTA	WT	796	797	0.000214194	328	329	0.000243215	1532	1533	0.000245122	NA	NA	NA	NA	NA	NA	NA	NA	NA	455	456	9.69321e-05	224	225	0.00010417	86	87	0.000108873	404	405	0.000217953	103	104	5.18431e-05	23	24	3.32125e-05	460	461	0.000130594	893	894	0.000193184	NA	NA	NA	NA	NA
AIFRKFDV	GCGATTTTCCGCAAGTTTGACGTC	WT	708	709	0.000190544	335	336	0.00024839	1571	1572	0.000251358	NA	NA	NA	NA	NA	NA	NA	NA	NA	526	527	0.000112025	234	235	0.000108799	104	105	0.000131398	269	270	0.000145302	103	104	5.18431e-05	180	181	0.000250478	210	211	5.97731e-05	97	98	2.11768e-05	NA	NA	NA	NA	NA
AIFVFLHI	GCCATCTTTGTATTTCTCCATATC	WT	2592	2593	0.000696869	803	804	0.000594362	3774	3775	0.000603612	NA	NA	NA	NA	NA	NA	NA	NA	NA	1490	1491	0.000316942	681	682	0.00031575	226	227	0.000284071	424	425	0.000228716	462	463	0.000230802	464	465	0.000643493	693	694	0.0001966	1690	1691	0.000365407	NA	NA	NA	NA	NA
AIHRLLAL	GCTATTCATAGACTCCTCGCACTA	WT	1732	1733	0.000465744	550	551	0.00040733	3038	3039	0.000485927	NA	NA	NA	NA	NA	NA	NA	NA	NA	1114	1115	0.000237016	515	516	0.000238896	208	209	0.000261545	1861	1862	0.00100204	51	52	2.59216e-05	146	147	0.000203427	415	416	0.000117847	900	901	0.000194697	NA	NA	NA	NA	NA
AIIAFKTL	GCGATTATTGCATTTAAAACCCTC	WT	552	553	0.000148619	183	184	0.000136023	924	925	0.000147905	NA	NA	NA	NA	NA	NA	NA	NA	NA	349	350	7.43996e-05	155	156	7.22243e-05	50	51	6.3822e-05	4832	4833	0.0026009	5	6	2.99095e-06	4	5	6.91928e-06	238	239	6.77051e-05	50	51	1.10206e-05	NA	NA	NA	NA	NA
AIKVYCNM	GCAATCAAAGTCTATTGTAACATG	WT	1152	1153	0.000309869	584	585	0.000432465	2387	2388	0.000381834	NA	NA	NA	NA	NA	NA	NA	NA	NA	811	812	0.000172607	361	362	0.000167597	157	158	0.000197723	714	715	0.00038478	224	225	0.000112161	149	150	0.000207578	83	84	2.37959e-05	428	429	9.27024e-05	NA	NA	NA	NA	NA
AILALSLL	GCTATACTTGCTCTCTCTCTGTTG	WT	3495	3496	0.00093955	1364	1365	0.00100908	5677	5678	0.000907896	NA	NA	NA	NA	NA	NA	NA	NA	NA	1944	1945	0.000413449	993	994	0.000460198	370	371	0.000464274	1321	1322	0.00071144	634	635	0.000316542	293	294	0.000406853	2924	2925	0.000828608	5990	5991	0.00129459	NA	NA	NA	NA	NA
AILLPAYL	GCCATATTGTTGCCCGCGTATCTA	WT	1064	1065	0.000286219	435	436	0.000322315	2074	2075	0.000331786	NA	NA	NA	NA	NA	NA	NA	NA	NA	711	712	0.00015135	302	303	0.000140282	102	103	0.000128895	642	643	0.000346033	788	789	0.00039331	10	11	1.52224e-05	287	288	8.15861e-05	79	80	1.72872e-05	NA	NA	NA	NA	NA
AILLRAFL	GCGATACTCCTTAGAGCCTTCCTT	WT	1303	1304	0.00035045	483	484	0.0003578	1963	1964	0.000314038	NA	NA	NA	NA	NA	NA	NA	NA	NA	855	856	0.00018196	398	399	0.000184727	141	142	0.000177701	75	76	4.08997e-05	513	514	0.000256225	186	187	0.000258781	35289	35290	0.00999712	662	663	0.000143267	NA	NA	NA	NA	NA
AILYFIPL	GCCATACTGTATTTTATACCCCTT	WT	1808	1809	0.000486169	688	689	0.000509347	3097	3098	0.000495361	NA	NA	NA	NA	NA	NA	NA	NA	NA	1166	1167	0.00024807	561	562	0.000260193	198	199	0.000249031	559	560	0.000301366	262	263	0.000131103	82	83	0.00011486	1229	1230	0.00034844	349	350	7.56313e-05	NA	NA	NA	NA	NA
AILYYVNL	GCGATCCTTTATTACGTAAACTTG	WT	1139	1140	0.000306375	389	390	0.00028831	1967	1968	0.000314677	NA	NA	NA	NA	NA	NA	NA	NA	NA	761	762	0.000161979	323	324	0.000150004	126	127	0.000158929	70	71	3.8209e-05	957	958	0.000477555	561	562	0.000777727	2182	2183	0.000618411	2917	2918	0.000630549	NA	NA	NA	NA	NA
AIPKLYSL	GCGATTCCAAAACTTTATTCGCTG	WT	219	220	5.9125e-05	118	119	8.79714e-05	587	588	9.40195e-05	NA	NA	NA	NA	NA	NA	NA	NA	NA	201	202	4.29392e-05	93	94	4.35197e-05	31	32	4.00452e-05	228	229	0.000123237	12	13	6.48039e-06	NA	1	1.38386e-06	442	443	0.000125495	390	391	8.4491e-05	NA	NA	NA	NA	NA
AIRTYLNL	GCAATTCGAACCTACTTGAATTTA	WT	442	443	0.000119056	145	146	0.000107931	901	902	0.000144227	NA	NA	NA	NA	NA	NA	NA	NA	NA	341	342	7.26991e-05	132	133	6.15758e-05	67	68	8.50961e-05	2	3	1.61446e-06	131	132	6.58009e-05	219	220	0.000304448	12	13	3.6827e-06	230	231	4.99167e-05	NA	NA	NA	NA	NA
AISFFILM	GCAATATCGTTCTTCATACTAATG	WT	1231	1232	0.0003311	505	506	0.000374063	2360	2361	0.000377517	NA	NA	NA	NA	NA	NA	NA	NA	NA	814	815	0.000173245	424	425	0.000196765	139	140	0.000175198	2395	2396	0.00128942	1701	1702	0.000848433	131	132	0.000182669	327	328	9.29175e-05	481	482	0.000104155	NA	NA	NA	NA	NA
AITLFGNL	GCAATTACCTTATTTGGGAACTTA	WT	681	682	0.000183287	270	271	0.000200338	1102	1103	0.000176367	NA	NA	NA	NA	NA	NA	NA	NA	NA	376	377	8.0139e-05	158	159	7.36132e-05	70	71	8.88503e-05	22	23	1.23775e-05	14	15	7.47737e-06	372	373	0.000516178	508	509	0.000144192	1860	1861	0.000402143	NA	NA	NA	NA	NA
AIWRYLYL	GCCATTTGGCGTTACCTCTATTTG	WT	409	410	0.000110187	160	161	0.00011902	850	851	0.000136072	NA	NA	NA	NA	NA	NA	NA	NA	NA	320	321	6.82351e-05	149	150	6.94464e-05	61	62	7.75876e-05	973	974	0.000524162	12	13	6.48039e-06	25	26	3.59802e-05	180	181	5.12746e-05	13559	13560	0.00293017	NA	NA	NA	NA	NA
AIWVLPLL	GCAATTTGGGTGTTACCGCTGCTC	WT	1218	1219	0.000327606	491	492	0.000363714	2114	2115	0.000338182	NA	NA	NA	NA	NA	NA	NA	NA	NA	811	812	0.000172607	359	360	0.000166671	120	121	0.000151421	189	190	0.000102249	909	910	0.000453627	186	187	0.000258781	212	213	6.03397e-05	846	847	0.000183028	NA	NA	NA	NA	NA
AIYHGIPI	GCCATATACCATGGGATCCCTATA	WT	1018	1019	0.000273856	402	403	0.00029792	1860	1861	0.000297569	NA	NA	NA	NA	NA	NA	NA	NA	NA	665	666	0.000141572	316	317	0.000146763	90	91	0.000113879	300	301	0.000161984	564	565	0.000281648	5	6	8.30313e-06	56	57	1.61472e-05	999	1000	0.00021609	NA	NA	NA	NA	NA
AIYNMASV	GCGATTTACAATATGGCGTCAGTG	WT	635	636	0.000170925	229	230	0.000170029	1205	1206	0.000192836	NA	NA	NA	NA	NA	NA	NA	NA	NA	328	329	6.99357e-05	166	167	7.7317e-05	70	71	8.88503e-05	248	249	0.000134	73	74	3.68884e-05	31	32	4.42834e-05	963	964	0.000273087	1232	1233	0.000266438	NA	NA	NA	NA	NA
AIYYFKIA	GCCATTTACTATTTTAAGATAGCT	WT	2978	2979	0.000800606	1006	1007	0.00074443	4892	4893	0.000782377	NA	NA	NA	NA	NA	NA	NA	NA	NA	1758	1759	0.000373911	880	881	0.000407882	286	287	0.000359155	668	669	0.000360025	1063	1064	0.000530395	1096	1097	0.00151809	2389	2390	0.000677051	1274	1275	0.000275514	NA	NA	NA	NA	NA
AKYIFLSL	GCTAAATATATCTTCTTGTCACTG	WT	1538	1539	0.000413606	592	593	0.000438379	2675	2676	0.000427885	NA	NA	NA	NA	NA	NA	NA	NA	NA	947	948	0.000201517	439	440	0.000203709	161	162	0.000202729	1696	1697	0.000913248	47	48	2.39276e-05	202	203	0.000280923	370	371	0.000105099	627	628	0.000135704	NA	NA	NA	NA	NA
ALFAMAKL	GCGTTATTTGCGATGGCTAAGCTA	WT	1456	1457	0.000391569	544	545	0.000402894	2588	2589	0.000413974	NA	NA	NA	NA	NA	NA	NA	NA	NA	898	899	0.000191101	390	391	0.000181024	158	159	0.000198975	474	475	0.000255623	74	75	3.73869e-05	46	47	6.50412e-05	332	333	9.43339e-05	545	546	0.000117985	NA	NA	NA	NA	NA
ALFAYSSF	GCCCTGTTTGCTTATTCTTCTTTT	WT	6557	6558	0.00176246	2181	2182	0.00161306	10324	10325	0.00165094	NA	NA	NA	NA	NA	NA	NA	NA	NA	4171	4172	0.000886844	2131	2132	0.000987065	637	638	0.000798401	5840	5841	0.00314336	1758	1759	0.000876847	1613	1614	0.00223354	3396	3397	0.000962319	12715	12716	0.00274779	NA	NA	NA	NA	NA
ALFIMFAL	GCACTATTTATCATGTTTGCGTTA	WT	1793	1794	0.000482137	622	623	0.000460556	3152	3153	0.000504156	NA	NA	NA	NA	NA	NA	NA	NA	NA	1217	1218	0.000258911	519	520	0.000240748	180	181	0.000226506	479	480	0.000258314	1063	1064	0.000530395	65	66	9.13344e-05	4064	4065	0.00115155	1936	1937	0.000418565	NA	NA	NA	NA	NA
ALFLEFNM	GCATTATTTCTGGAATTCAATATG	WT	1000	1001	0.000269019	383	384	0.000283874	1821	1822	0.000291333	NA	NA	NA	NA	NA	NA	NA	NA	NA	662	663	0.000140934	281	282	0.000130559	136	137	0.000171444	24	25	1.34539e-05	431	432	0.000215348	40	41	5.67381e-05	1501	1502	0.000425494	1088	1089	0.000235321	NA	NA	NA	NA	NA
ALFLSLQL	GCCTTATTCCTGTCTCTGCAGCTT	WT	1015	1016	0.00027305	347	348	0.000257261	1654	1655	0.00026463	NA	NA	NA	NA	NA	NA	NA	NA	NA	650	651	0.000138383	292	293	0.000135652	104	105	0.000131398	95	96	5.16628e-05	248	249	0.000124124	290	291	0.000402702	1005	1006	0.000284985	261	262	5.66155e-05	NA	NA	NA	NA	NA
ALFYRHYL	GCACTTTTCTACCGACACTATCTG	WT	1148	1149	0.000308794	391	392	0.000289788	2024	2025	0.000323792	NA	NA	NA	NA	NA	NA	NA	NA	NA	759	760	0.000161553	301	302	0.000139819	137	138	0.000172695	122	123	6.6193e-05	177	178	8.87315e-05	39	40	5.53542e-05	599	600	0.000169971	146	147	3.17652e-05	NA	NA	NA	NA	NA
ALGSYATL	GCTCTCGGCTCATATGCCACTCTC	WT	96	97	2.60687e-05	27	28	2.06992e-05	153	154	2.46242e-05	NA	NA	NA	NA	NA	NA	NA	NA	NA	64	65	1.38171e-05	24	25	1.15744e-05	5	6	7.50848e-06	33	34	1.82972e-05	1	2	9.96983e-07	1	2	2.76771e-06	2	3	8.49855e-07	NA	1	2.1609e-07	NA	NA	NA	NA	NA
ALIELANL	GCCCTAATCGAACTGGCCAATCTT	WT	422	423	0.000113681	165	166	0.000122716	721	722	0.000115446	NA	NA	NA	NA	NA	NA	NA	NA	NA	324	325	6.90854e-05	145	146	6.75945e-05	42	43	5.38107e-05	18	19	1.02249e-05	39	40	1.99397e-05	5	6	8.30313e-06	8	9	2.54956e-06	530	531	0.000114744	NA	NA	NA	NA	NA
ALIKYHTL	GCACTTATAAAGTATCATACCCTG	WT	1185	1186	0.000318737	405	406	0.000300138	2021	2022	0.000323312	NA	NA	NA	NA	NA	NA	NA	NA	NA	731	732	0.000155602	310	311	0.000143986	137	138	0.000172695	975	976	0.000525239	3274	3275	0.00163256	49	50	6.91928e-05	10	11	3.11613e-06	138	139	3.00364e-05	NA	NA	NA	NA	NA
ALLLFRHL	GCTTTACTGTTATTCCGTCATCTT	WT	2314	2315	0.000622156	868	869	0.000642413	3785	3786	0.00060537	NA	NA	NA	NA	NA	NA	NA	NA	NA	1420	1421	0.000302063	677	678	0.000313898	232	233	0.000291579	636	637	0.000342804	272	273	0.000136088	209	210	0.00029061	211	212	6.00564e-05	6217	6218	0.00134364	NA	NA	NA	NA	NA
ALQYVAPL	GCTCTGCAATATGTAGCGCCTCTC	WT	365	366	9.83625e-05	168	169	0.000124934	665	666	0.000106491	NA	NA	NA	NA	NA	NA	NA	NA	NA	237	238	5.05918e-05	123	124	5.7409e-05	42	43	5.38107e-05	3	4	2.15262e-06	71	72	3.58914e-05	189	190	0.000262932	34	35	9.91497e-06	296	297	6.41786e-05	NA	NA	NA	NA	NA
ALTRFSHL	GCACTGACGCGGTTCTCCCATCTT	WT	297	298	8.00875e-05	92	93	6.87508e-05	472	473	7.56313e-05	NA	NA	NA	NA	NA	NA	NA	NA	NA	241	242	5.1442e-05	79	80	3.70381e-05	32	33	4.12966e-05	632	633	0.000340652	108	109	5.43356e-05	1	2	2.76771e-06	172	173	4.90083e-05	1575	1576	0.000340557	NA	NA	NA	NA	NA
ALVVFAYI	GCCTTAGTCGTATTTGCTTATATA	WT	2031	2032	0.0005461	731	732	0.000541135	3451	3452	0.000551965	NA	NA	NA	NA	NA	NA	NA	NA	NA	1338	1339	0.000284632	586	587	0.000271767	201	202	0.000252785	126	127	6.83456e-05	545	546	0.000272176	417	418	0.000578451	502	503	0.000142492	1260	1261	0.000272489	NA	NA	NA	NA	NA
ALYDYMPM	GCATTGTATGACTATATGCCCATG	WT	778	779	0.000209356	287	288	0.000212906	1514	1515	0.000242244	NA	NA	NA	NA	NA	NA	NA	NA	NA	414	415	8.82167e-05	216	217	0.000100466	62	63	7.8839e-05	792	793	0.000426756	1247	1248	0.000622117	8	9	1.24547e-05	1950	1951	0.000552689	807	808	0.0001746	NA	NA	NA	NA	NA
ALYFVALM	GCTTTGTACTTTGTGGCACTGATG	WT	1140	1141	0.000306644	428	429	0.000317141	1885	1886	0.000301566	NA	NA	NA	NA	NA	NA	NA	NA	NA	763	764	0.000162404	332	333	0.000154171	116	117	0.000146415	151	152	8.17995e-05	108	109	5.43356e-05	100	101	0.000139769	439	440	0.000124645	370	371	8.01692e-05	NA	NA	NA	NA	NA
ALYNLLAL	GCTCTTTACAACCTACTTGCCCTG	WT	364	365	9.80937e-05	155	156	0.000115324	596	597	9.54586e-05	NA	NA	NA	NA	NA	NA	NA	NA	NA	199	200	4.25141e-05	93	94	4.35197e-05	32	33	4.12966e-05	602	603	0.000324507	279	280	0.000139578	3	4	5.53542e-06	839	840	0.000237959	1310	1311	0.000283293	NA	NA	NA	NA	NA
ALYRGVSL	GCGCTTTACAGGGGCGTCTCATTA	WT	918	919	0.000246981	293	294	0.000217341	1312	1313	0.000209945	NA	NA	NA	NA	NA	NA	NA	NA	NA	503	504	0.000107135	221	222	0.000102781	72	73	9.13531e-05	230	231	0.000124314	129	130	6.48039e-05	19	20	2.76771e-05	55	56	1.5864e-05	1603	1604	0.000346608	NA	NA	NA	NA	NA
ALYRKMRL	GCTCTGTATAGAAAGATGAGGTTA	WT	1127	1128	0.00030315	417	418	0.000309009	1825	1826	0.000291972	NA	NA	NA	NA	NA	NA	NA	NA	NA	632	633	0.000134557	300	301	0.000139356	123	124	0.000155175	62	63	3.39037e-05	509	510	0.000254231	20	21	2.9061e-05	275	276	7.81866e-05	477	478	0.000103291	NA	NA	NA	NA	NA
ALYRYFSR	GCCCTTTATCGCTACTTTTCCCGG	WT	1387	1388	0.000373025	424	425	0.000314184	2284	2285	0.000365365	NA	NA	NA	NA	NA	NA	NA	NA	NA	959	960	0.000204068	432	433	0.000200469	160	161	0.000201477	53	54	2.90603e-05	694	695	0.000346452	13	14	1.9374e-05	227	228	6.4589e-05	518	519	0.00011215	NA	NA	NA	NA	NA
ALYTHCLF	GCGCTCTATACGCATTGTCTCTTC	WT	5389	5390	0.00144856	1927	1928	0.00142528	8715	8716	0.00139366	NA	NA	NA	NA	NA	NA	NA	NA	NA	2957	2958	0.000628783	1430	1431	0.000662519	572	573	0.000717059	1436	1437	0.000773328	4229	4230	0.00210862	30	31	4.28995e-05	1837	1838	0.000520678	3737	3738	0.000807743	NA	NA	NA	NA	NA
AMFFAPTM	GCAATGTTCTTTGCACCCACTATG	WT	1702	1703	0.000457681	710	711	0.000525611	3138	3139	0.000501917	NA	NA	NA	NA	NA	NA	NA	NA	NA	1054	1055	0.000224262	500	501	0.000231951	199	200	0.000250283	1029	1030	0.000554299	2871	2872	0.00143167	171	172	0.000238023	1521	1522	0.00043116	4094	4095	0.000884887	NA	NA	NA	NA	NA
AMFLHFSL	GCTATGTTCTTACACTTTTCCTTA	WT	2902	2903	0.000780181	1020	1021	0.00075478	4544	4545	0.000726732	NA	NA	NA	NA	NA	NA	NA	NA	NA	1691	1692	0.000359669	853	854	0.000395382	311	312	0.000390441	637	638	0.000343342	906	907	0.000452132	105	106	0.000146689	542	543	0.000153824	2147	2148	0.00046416	NA	NA	NA	NA	NA
AMFVLLGL	GCGATGTTTGTCCTTCTGGGTCTG	WT	583	584	0.00015695	209	210	0.000155244	1035	1036	0.000165653	NA	NA	NA	NA	NA	NA	NA	NA	NA	350	351	7.46122e-05	185	186	8.61135e-05	67	68	8.50961e-05	125	126	6.78074e-05	18	19	9.47134e-06	245	246	0.000340428	533	534	0.000151274	948	949	0.000205069	NA	NA	NA	NA	NA
AMHVHGSL	GCCATGCATGTGCACGGCAGTCTC	WT	1551	1552	0.0004171	585	586	0.000433204	2435	2436	0.000389509	NA	NA	NA	NA	NA	NA	NA	NA	NA	915	916	0.000194714	389	390	0.000180561	132	133	0.000166438	176	177	9.52533e-05	933	934	0.000465591	35	36	4.98188e-05	1084	1085	0.000307364	493	494	0.000106748	NA	NA	NA	NA	NA
AMLFALNI	GCCATGTTATTTGCGCTGAACATA	WT	4737	4738	0.00127334	1956	1957	0.00144672	8814	8815	0.00140949	NA	NA	NA	NA	NA	NA	NA	NA	NA	3290	3291	0.000699569	1301	1302	0.000602795	495	496	0.000620701	96532	96533	0.0519497	657	658	0.000328007	663	664	0.00091888	6145	6146	0.00174107	1782	1783	0.000385288	NA	NA	NA	NA	NA
AMLMRVGL	GCTATGTTAATGAGGGTGGGCCTT	WT	124	125	3.35937e-05	51	52	3.84413e-05	203	204	3.2619e-05	NA	NA	NA	NA	NA	NA	NA	NA	NA	67	68	1.44548e-05	43	44	2.03709e-05	15	16	2.00226e-05	16	17	9.14862e-06	91	92	4.58612e-05	50	51	7.05766e-05	51	52	1.47308e-05	4	5	1.08045e-06	NA	NA	NA	NA	NA
AMRSLASL	GCTATGAGGTCGCTGGCTAGCCTT	WT	647	648	0.00017415	271	272	0.000201078	1080	1081	0.000172849	NA	NA	NA	NA	NA	NA	NA	NA	NA	391	392	8.33276e-05	183	184	8.51876e-05	83	84	0.000105119	260	261	0.000140458	48	49	2.44261e-05	294	295	0.000408237	10	11	3.11613e-06	344	345	7.45509e-05	NA	NA	NA	NA	NA
AMVFFVVL	GCAATGGTGTTCTTCGTCGTCTTG	WT	2659	2660	0.000714875	1048	1049	0.000775479	4764	4765	0.00076191	NA	NA	NA	NA	NA	NA	NA	NA	NA	1850	1851	0.000393468	729	730	0.000337973	339	340	0.00042548	515	516	0.000277688	1444	1445	0.00072032	307	308	0.000426227	2680	2681	0.000759487	5348	5349	0.00115586	NA	NA	NA	NA	NA
AMVRCLPL	GCGATGGTTAGGTGCCTACCCCTA	WT	68	69	1.85437e-05	22	23	1.70029e-05	158	159	2.54236e-05	NA	NA	NA	NA	NA	NA	NA	NA	NA	55	56	1.19039e-05	33	34	1.57412e-05	7	8	1.00113e-05	1	2	1.07631e-06	NA	1	4.98492e-07	NA	1	1.38386e-06	NA	1	2.83285e-07	NA	1	2.1609e-07	NA	NA	NA	NA	NA
AMVVYLNI	GCTATGGTCGTGTACCTTAATATC	WT	1327	1328	0.0003569	442	443	0.00032749	2262	2263	0.000361847	NA	NA	NA	NA	NA	NA	NA	NA	NA	798	799	0.000169844	385	386	0.000178709	140	141	0.000176449	569	570	0.000306748	496	497	0.00024775	77	78	0.000107941	208	209	5.92065e-05	390	391	8.4491e-05	NA	NA	NA	NA	NA
ANAWHHGL	GCCAATGCATGGCACCACGGTTTA	WT	1951	1952	0.0005246	740	741	0.000547788	3788	3789	0.00060585	NA	NA	NA	NA	NA	NA	NA	NA	NA	1263	1264	0.000268689	554	555	0.000256952	182	183	0.000229008	6017	6018	0.00323861	1324	1325	0.000660501	829	830	0.0011486	1180	1181	0.000334559	1600	1601	0.000345959	NA	NA	NA	NA	NA
ANCIFLNI	GCGAACTGCATTTTCTTAAATATC	WT	1562	1563	0.000420056	609	610	0.000450946	2842	2843	0.000454587	NA	NA	NA	NA	NA	NA	NA	NA	NA	1073	1074	0.000228301	442	443	0.000205098	181	182	0.000227757	2269	2270	0.00122161	311	312	0.000155529	174	175	0.000242175	1081	1082	0.000306514	2942	2943	0.000635951	NA	NA	NA	NA	NA
ANFDKSRL	GCGAATTTCGACAAATCACGCCTT	WT	237	238	6.39625e-05	102	103	7.61433e-05	516	517	8.26668e-05	NA	NA	NA	NA	NA	NA	NA	NA	NA	145	146	3.10353e-05	85	86	3.98159e-05	26	27	3.37881e-05	5	6	3.22893e-06	128	129	6.43054e-05	1	2	2.76771e-06	1346	1347	0.000381585	725	726	0.000156881	NA	NA	NA	NA	NA
ANFFLRLI	GCTAATTTCTTTCTCCGCCTAATA	WT	1276	1277	0.000343194	418	419	0.000309748	2005	2006	0.000320754	NA	NA	NA	NA	NA	NA	NA	NA	NA	755	756	0.000160703	341	342	0.000158338	109	110	0.000137655	446	447	0.000240555	82	83	4.13748e-05	62	63	8.71829e-05	2146	2147	0.000608213	374	375	8.10336e-05	NA	NA	NA	NA	NA
ANFLEEPL	GCAAACTTTCTCGAGGAGCCACTG	WT	694	695	0.000186781	230	231	0.000170768	1254	1255	0.000200671	NA	NA	NA	NA	NA	NA	NA	NA	NA	438	439	9.33184e-05	194	195	9.02803e-05	83	84	0.000105119	102	103	5.54299e-05	17	18	8.97285e-06	1	2	2.76771e-06	36	37	1.04815e-05	645	646	0.000139594	NA	NA	NA	NA	NA
ANFQFFSC	GCAAACTTCCAGTTCTTTAGCTGT	WT	680	681	0.000183019	219	220	0.000162636	1059	1060	0.000169491	NA	NA	NA	NA	NA	NA	NA	NA	NA	416	417	8.86419e-05	192	193	8.93544e-05	65	66	8.25932e-05	436	437	0.000235173	145	146	7.27798e-05	9	10	1.38386e-05	1158	1159	0.000328327	541	542	0.000117121	NA	NA	NA	NA	NA
ANISYLTV	GCCAACATCAGTTACTTAACAGTC	WT	697	698	0.000187587	261	262	0.000193685	1187	1188	0.000189958	NA	NA	NA	NA	NA	NA	NA	NA	NA	395	396	8.41779e-05	186	187	8.65765e-05	77	78	9.76102e-05	54	55	2.95985e-05	23	24	1.19638e-05	19	20	2.76771e-05	726	727	0.000205948	1225	1226	0.000264926	NA	NA	NA	NA	NA
ANKTFIYL	GCCAATAAAACTTTCATTTACTTG	WT	677	678	0.000182212	231	232	0.000171507	1162	1163	0.00018596	NA	NA	NA	NA	NA	NA	NA	NA	NA	439	440	9.3531e-05	173	174	8.05578e-05	65	66	8.25932e-05	351	352	0.00018943	343	344	0.000171481	10	11	1.52224e-05	89	90	2.54956e-05	965	966	0.000208742	NA	NA	NA	NA	NA
ANLSFADI	GCGAACCTGAGCTTCGCGGATATC	WT	566	567	0.000152381	175	176	0.000130109	1097	1098	0.000175567	NA	NA	NA	NA	NA	NA	NA	NA	NA	401	402	8.54533e-05	147	148	6.85205e-05	61	62	7.75876e-05	111	112	6.02733e-05	14	15	7.47737e-06	2	3	4.15157e-06	NA	1	2.83285e-07	1055	1056	0.000228191	NA	NA	NA	NA	NA
ANLSFAVL	GCTAACTTATCTTTTGCTGTCTTA	WT	3664	3665	0.000984969	1252	1253	0.000926287	5848	5849	0.000935238	NA	NA	NA	NA	NA	NA	NA	NA	NA	2290	2291	0.000486999	1004	1005	0.000465291	357	358	0.000448006	3284	3285	0.00176784	1566	1567	0.000781136	1308	1309	0.00181147	2386	2387	0.000676201	1538	1539	0.000332562	NA	NA	NA	NA	NA
ANLSFTDI	GCGAACCTCTCTTTCACAGACATT	WT	1168	1169	0.000314169	435	436	0.000322315	2023	2024	0.000323632	NA	NA	NA	NA	NA	NA	NA	NA	NA	732	733	0.000155814	342	343	0.000158801	136	137	0.000171444	357	358	0.000192659	145	146	7.27798e-05	836	837	0.00115829	176	177	5.01414e-05	2704	2705	0.000584522	NA	NA	NA	NA	NA
ANLYFLDV	GCGAATCTCTACTTCTTGGACGTT	WT	1075	1076	0.000289175	371	372	0.000275003	1837	1838	0.000293891	NA	NA	NA	NA	NA	NA	NA	NA	NA	657	658	0.000139871	288	289	0.0001338	110	111	0.000138907	136	137	7.37271e-05	127	128	6.38069e-05	179	180	0.000249094	966	967	0.000273937	1469	1470	0.000317652	NA	NA	NA	NA	NA
ANNFTTPL	GCAAATAATTTCACTACGCCGTTG	WT	367	368	9.89e-05	81	82	6.0619e-05	731	732	0.000117045	NA	NA	NA	NA	NA	NA	NA	NA	NA	226	227	4.82535e-05	90	91	4.21308e-05	43	44	5.50622e-05	779	780	0.00041976	6	7	3.48944e-06	119	120	0.000166063	NA	1	2.83285e-07	486	487	0.000105236	NA	NA	NA	NA	NA
ANSPYATL	GCTAACAGCCCGTACGCCACATTG	WT	324	325	8.73437e-05	118	119	8.79714e-05	590	591	9.44992e-05	NA	NA	NA	NA	NA	NA	NA	NA	NA	211	212	4.50649e-05	84	85	3.9353e-05	29	30	3.75424e-05	NA	1	5.38154e-07	13	14	6.97888e-06	21	22	3.04448e-05	162	163	4.61754e-05	1	2	4.32179e-07	NA	NA	NA	NA	NA
ANYDFYQL	GCGAACTACGATTTCTATCAACTT	WT	1271	1272	0.00034185	346	347	0.000256522	1957	1958	0.000313079	NA	NA	NA	NA	NA	NA	NA	NA	NA	687	688	0.000146248	312	313	0.000144911	144	145	0.000181455	169	170	9.14862e-05	356	357	0.000177961	44	45	6.22735e-05	381	382	0.000108215	258	259	5.59672e-05	NA	NA	NA	NA	NA
ANYILLAF	GCTAACTATATCCTGCTCGCTTTC	WT	810	811	0.000217956	231	232	0.000171507	1266	1267	0.00020259	NA	NA	NA	NA	NA	NA	NA	NA	NA	425	426	9.0555e-05	246	247	0.000114355	66	67	8.38446e-05	252	253	0.000136153	46	47	2.34291e-05	5	6	8.30313e-06	585	586	0.000166005	261	262	5.66155e-05	NA	NA	NA	NA	NA
ANYKTIGL	GCAAACTATAAAACGATTGGTCTG	WT	203	204	5.4825e-05	104	105	7.76218e-05	431	432	6.90755e-05	NA	NA	NA	NA	NA	NA	NA	NA	NA	168	169	3.59244e-05	55	56	2.59267e-05	18	19	2.37768e-05	2	3	1.61446e-06	NA	1	4.98492e-07	2	3	4.15157e-06	53	54	1.52974e-05	7	8	1.72872e-06	NA	NA	NA	NA	NA
ANYSDCFL	GCTAACTACTCCGATTGTTTCCTC	WT	1298	1299	0.000349106	429	430	0.00031788	1920	1921	0.000307162	NA	NA	NA	NA	NA	NA	NA	NA	NA	675	676	0.000143698	351	352	0.000162968	136	137	0.000171444	194	195	0.00010494	46	47	2.34291e-05	133	134	0.000185437	6100	6101	0.00172832	279	280	6.05051e-05	NA	NA	NA	NA	NA
APFFATFL	GCACCGTTCTTTGCTACATTCCTT	WT	1248	1249	0.000335669	447	448	0.000331187	2072	2073	0.000331467	NA	NA	NA	NA	NA	NA	NA	NA	NA	694	695	0.000147736	357	358	0.000165745	126	127	0.000158929	230	231	0.000124314	109	110	5.48341e-05	220	221	0.000305832	606	607	0.000171954	385	386	8.34105e-05	NA	NA	NA	NA	NA
APFVYTYL	GCTCCCTTCGTTTATACCTACTTA	WT	862	863	0.000231931	373	374	0.000276482	1491	1492	0.000238566	NA	NA	NA	NA	NA	NA	NA	NA	NA	534	535	0.000113725	274	275	0.000127318	105	106	0.00013265	128	129	6.94219e-05	46	47	2.34291e-05	590	591	0.000817858	260	261	7.39374e-05	1101	1102	0.000238131	NA	NA	NA	NA	NA
APRLYYPL	GCTCCTCGTCTCTACTATCCCCTA	WT	1575	1576	0.00042355	623	624	0.000461296	2515	2516	0.000402301	NA	NA	NA	NA	NA	NA	NA	NA	NA	949	950	0.000201942	434	435	0.000201395	161	162	0.000202729	756	757	0.000407383	276	277	0.000138082	445	446	0.000617199	1723	1724	0.000488383	1230	1231	0.000266006	NA	NA	NA	NA	NA
AQATYSGL	GCCCAGGCAACCTATTCGGGGCTT	WT	301	302	8.11625e-05	78	79	5.84012e-05	414	415	6.63573e-05	NA	NA	NA	NA	NA	NA	NA	NA	NA	202	203	4.31518e-05	58	59	2.73156e-05	18	19	2.37768e-05	1	2	1.07631e-06	66	67	3.33989e-05	5	6	8.30313e-06	1	2	5.6657e-07	6	7	1.51263e-06	NA	NA	NA	NA	NA
AQFFQAGV	GCTCAATTCTTTCAAGCTGGGGTG	WT	922	923	0.000248056	362	363	0.00026835	1676	1677	0.000268147	NA	NA	NA	NA	NA	NA	NA	NA	NA	639	640	0.000136045	276	277	0.000128244	105	106	0.00013265	179	180	9.68678e-05	112	113	5.63295e-05	113	114	0.000157759	284	285	8.07362e-05	273	274	5.92085e-05	NA	NA	NA	NA	NA
AQFYFLCL	GCTCAATTTTATTTCCTTTGTTTG	WT	2996	2997	0.000805444	985	986	0.000728906	4617	4618	0.000738405	NA	NA	NA	NA	NA	NA	NA	NA	NA	1797	1798	0.000382202	960	961	0.00044492	320	321	0.000401703	769	770	0.000414379	368	369	0.000183943	1645	1646	0.00227783	1150	1151	0.000326061	4329	4330	0.000935668	NA	NA	NA	NA	NA
AQIFFVYI	GCGCAAATATTCTTCGTCTATATA	WT	4019	4020	0.00108037	1405	1406	0.00103939	6473	6474	0.00103517	NA	NA	NA	NA	NA	NA	NA	NA	NA	2277	2278	0.000484235	1028	1029	0.000476402	387	388	0.000485548	1196	1197	0.000644171	2383	2384	0.0011884	175	176	0.000243559	1346	1347	0.000381585	1225	1226	0.000264926	NA	NA	NA	NA	NA
AQLHFLCL	GCGCAGTTACATTTCCTCTGCCTT	WT	1168	1169	0.000314169	434	435	0.000321576	1847	1848	0.00029549	NA	NA	NA	NA	NA	NA	NA	NA	NA	687	688	0.000146248	291	292	0.000135189	140	141	0.000176449	2901	2902	0.00156172	75	76	3.78854e-05	74	75	0.000103789	2675	2676	0.00075807	3974	3975	0.000858956	NA	NA	NA	NA	NA
AQRAFVAL	GCCCAGCGCGCGTTCGTGGCATTA	WT	494	495	0.000133031	194	195	0.000144155	795	796	0.000127278	NA	NA	NA	NA	NA	NA	NA	NA	NA	338	339	7.20614e-05	124	125	5.7872e-05	51	52	6.50735e-05	98	99	5.32773e-05	28	29	1.44563e-05	380	381	0.000527249	892	893	0.000252973	38	39	8.42749e-06	NA	NA	NA	NA	NA
AQRTYGPL	GCTCAACGGACCTATGGTCCATTG	WT	254	255	6.85312e-05	67	68	5.02694e-05	316	317	5.06874e-05	NA	NA	NA	NA	NA	NA	NA	NA	NA	116	117	2.48707e-05	58	59	2.73156e-05	16	17	2.1274e-05	23	24	1.29157e-05	NA	1	4.98492e-07	153	154	0.000213114	3	4	1.13314e-06	296	297	6.41786e-05	NA	NA	NA	NA	NA
AQSNYVRL	GCCCAATCGAACTATGTTCGACTC	WT	1567	1568	0.0004214	546	547	0.000404373	2683	2684	0.000429164	NA	NA	NA	NA	NA	NA	NA	NA	NA	913	914	0.000194289	395	396	0.000183339	158	159	0.000198975	1005	1006	0.000541383	138	139	6.92903e-05	4335	4336	0.0060004	311	312	8.83849e-05	6544	6545	0.00141431	NA	NA	NA	NA	NA
AQTSFFRL	GCGCAAACCAGTTTCTTTAGATTG	WT	980	981	0.000263644	297	298	0.000220298	1566	1567	0.000250559	NA	NA	NA	NA	NA	NA	NA	NA	NA	475	476	0.000101184	237	238	0.000110188	81	82	0.000102616	342	343	0.000184587	222	223	0.000111164	10	11	1.52224e-05	1782	1783	0.000505097	1052	1053	0.000227542	NA	NA	NA	NA	NA
AQVPFIAL	GCCCAGGTTCCCTTTATAGCATTA	WT	1026	1027	0.000276006	412	413	0.000305313	1681	1682	0.000268947	NA	NA	NA	NA	NA	NA	NA	NA	NA	594	595	0.000126479	253	254	0.000117596	109	110	0.000137655	417	418	0.000224949	185	186	9.27194e-05	220	221	0.000305832	1107	1108	0.00031388	247	248	5.35902e-05	NA	NA	NA	NA	NA
AQYRFNLS	GCGCAGTACCGATTCAATTTGTCC	WT	434	435	0.000116906	126	127	9.38855e-05	845	846	0.000135273	NA	NA	NA	NA	NA	NA	NA	NA	NA	269	270	5.7394e-05	106	107	4.95384e-05	32	33	4.12966e-05	213	214	0.000115165	1	2	9.96983e-07	297	298	0.000412389	59	60	1.69971e-05	118	119	2.57147e-05	NA	NA	NA	NA	NA
ARRFFAPL	GCGCGCCGTTTCTTCGCTCCGTTA	WT	423	424	0.00011395	159	160	0.000118281	738	739	0.000118164	NA	NA	NA	NA	NA	NA	NA	NA	NA	183	184	3.9113e-05	97	98	4.53717e-05	37	38	4.75537e-05	14	15	8.07232e-06	119	120	5.9819e-05	7	8	1.10708e-05	17	18	5.09913e-06	577	578	0.0001249	NA	NA	NA	NA	NA
ASAAYLSL	GCCTCTGCGGCATACTTGTCCTTA	WT	1106	1107	0.000297506	382	383	0.000283135	2017	2018	0.000322672	NA	NA	NA	NA	NA	NA	NA	NA	NA	665	666	0.000141572	323	324	0.000150004	114	115	0.000143912	2659	2660	0.00143149	74	75	3.73869e-05	329	330	0.000456672	116	117	3.31443e-05	3090	3091	0.000667933	NA	NA	NA	NA	NA
ASAEFCNI	GCTTCCGCTGAATTCTGCAATATA	WT	1326	1327	0.000356631	515	516	0.000381456	2159	2160	0.000345378	NA	NA	NA	NA	NA	NA	NA	NA	NA	921	922	0.00019599	375	376	0.000174079	179	180	0.000225254	243	244	0.00013131	99	100	4.98492e-05	63	64	8.85667e-05	443	444	0.000125779	864	865	0.000186917	NA	NA	NA	NA	NA
ASASFQEL	GCCAGCGCCAGCTTTCAGGAGTTG	WT	709	710	0.000190812	248	249	0.000184075	1185	1186	0.000189638	NA	NA	NA	NA	NA	NA	NA	NA	NA	408	409	8.69413e-05	207	208	9.6299e-05	49	50	6.25706e-05	210	211	0.000113551	250	251	0.000125121	124	125	0.000172982	35	36	1.01983e-05	462	463	0.000100049	NA	NA	NA	NA	NA
ASASHSRL	GCCTCCGCCAGTCATTCCAGACTA	WT	1250	1251	0.000336206	514	515	0.000380717	1952	1953	0.000312279	NA	NA	NA	NA	NA	NA	NA	NA	NA	846	847	0.000180047	342	343	0.000158801	117	118	0.000147667	319	320	0.000172209	169	170	8.47436e-05	880	881	0.00121918	2148	2149	0.000608779	745	746	0.000161203	NA	NA	NA	NA	NA
ASAVFRLL	GCATCGGCCGTGTTTCGGCTACTA	WT	530	531	0.000142706	209	210	0.000155244	845	846	0.000135273	NA	NA	NA	NA	NA	NA	NA	NA	NA	326	327	6.95105e-05	158	159	7.36132e-05	42	43	5.38107e-05	41	42	2.26025e-05	526	527	0.000262705	86	87	0.000120395	256	257	7.28042e-05	77	78	1.6855e-05	NA	NA	NA	NA	NA
ASCLYYLL	GCAAGTTGCCTTTATTATCTTCTC	WT	1165	1166	0.000313362	408	409	0.000302356	1823	1824	0.000291652	NA	NA	NA	NA	NA	NA	NA	NA	NA	640	641	0.000136258	337	338	0.000156486	117	118	0.000147667	237	238	0.000128081	48	49	2.44261e-05	14	15	2.07578e-05	1103	1104	0.000312747	613	614	0.000132679	NA	NA	NA	NA	NA
ASFDKAKL	GCGTCCTTTGATAAGGCCAAACTT	WT	508	509	0.000136794	166	167	0.000123456	692	693	0.000110809	NA	NA	NA	NA	NA	NA	NA	NA	NA	294	295	6.27083e-05	144	145	6.71315e-05	60	61	7.63362e-05	105	106	5.70444e-05	118	119	5.93205e-05	84	85	0.000117628	230	231	6.54388e-05	128	129	2.78755e-05	NA	NA	NA	NA	NA
ASFEQAAF	GCGTCTTTTGAACAGGCCGCTTTT	WT	2498	2499	0.000671606	789	790	0.000584012	3890	3891	0.00062216	NA	NA	NA	NA	NA	NA	NA	NA	NA	1517	1518	0.000322682	669	670	0.000310194	227	228	0.000285322	401	402	0.000216338	416	417	0.000207871	2424	2425	0.00335585	2576	2577	0.000730025	1220	1221	0.000263845	NA	NA	NA	NA	NA
ASFHRFNL	GCCAGTTTCCATCGATTTAACCTC	WT	3251	3252	0.000873975	1231	1232	0.000910763	5622	5623	0.000899101	NA	NA	NA	NA	NA	NA	NA	NA	NA	2152	2153	0.000457664	1053	1054	0.000487977	347	348	0.000435492	1127	1128	0.000607038	197	198	9.87013e-05	913	914	0.00126484	1080	1081	0.000306231	2457	2458	0.000531148	NA	NA	NA	NA	NA
ASFLPLLL	GCCTCATTCCTGCCTCTCCTTCTA	WT	133	134	3.60125e-05	50	51	3.7702e-05	249	250	3.99743e-05	NA	NA	NA	NA	NA	NA	NA	NA	NA	75	76	1.61553e-05	36	37	1.71301e-05	13	14	1.75198e-05	16	17	9.14862e-06	15	16	7.97587e-06	25	26	3.59802e-05	10	11	3.11613e-06	216	217	4.68914e-05	NA	NA	NA	NA	NA
ASFNSGEL	GCAAGCTTCAATTCTGGGGAACTT	WT	402	403	0.000108306	144	145	0.000107192	745	746	0.000119283	NA	NA	NA	NA	NA	NA	NA	NA	NA	282	283	6.01574e-05	131	132	6.11128e-05	60	61	7.63362e-05	31	32	1.72209e-05	10	11	5.48341e-06	1178	1179	0.00163157	139	140	3.96599e-05	1176	1177	0.000254337	NA	NA	NA	NA	NA
ASFPFPGS	GCCAGCTTTCCATTTCCCGGATCT	WT	1884	1885	0.000506594	706	707	0.000522654	3158	3159	0.000505115	NA	NA	NA	NA	NA	NA	NA	NA	NA	1175	1176	0.000249983	563	564	0.000261118	175	176	0.000220249	409	410	0.000220643	1633	1634	0.000814535	110	111	0.000153608	916	917	0.000259772	18063	18064	0.00390344	NA	NA	NA	NA	NA
ASFPKLEL	GCTAGCTTCCCTAAACTCGAATTG	WT	820	821	0.000220644	270	271	0.000200338	1452	1453	0.00023233	NA	NA	NA	NA	NA	NA	NA	NA	NA	563	564	0.00011989	258	259	0.000119911	97	98	0.000122638	152	153	8.23376e-05	233	234	0.000116647	121	122	0.00016883	236	237	6.71385e-05	715	716	0.00015472	NA	NA	NA	NA	NA
ASFSNNNL	GCCTCATTTAGTAACAATAATCTA	WT	818	819	0.000220106	377	378	0.000279439	1280	1281	0.000204828	NA	NA	NA	NA	NA	NA	NA	NA	NA	575	576	0.000122441	294	295	0.000136578	88	89	0.000111376	192	193	0.000103864	227	228	0.000113656	38	39	5.39703e-05	2213	2214	0.000627193	126	127	2.74434e-05	NA	NA	NA	NA	NA
ASFTHSFV	GCTAGTTTTACCCACAGCTTTGTA	WT	1074	1075	0.000288906	411	412	0.000304573	1845	1846	0.00029517	NA	NA	NA	NA	NA	NA	NA	NA	NA	738	739	0.00015709	309	310	0.000143523	109	110	0.000137655	117	118	6.35022e-05	561	562	0.000280152	132	133	0.000184053	2365	2366	0.000670252	240	241	5.20776e-05	NA	NA	NA	NA	NA
ASFTVSVF	GCGTCGTTTACGGTATCAGTTTTC	WT	579	580	0.000155875	178	179	0.000132327	828	829	0.000132555	NA	NA	NA	NA	NA	NA	NA	NA	NA	381	382	8.12019e-05	158	159	7.36132e-05	61	62	7.75876e-05	56	57	3.06748e-05	18	19	9.47134e-06	163	164	0.000226952	197	198	5.60904e-05	284	285	6.15855e-05	NA	NA	NA	NA	NA
ASFYISLV	GCATCCTTCTACATATCTTTGGTC	WT	1330	1331	0.000357706	462	463	0.000342275	1978	1979	0.000316436	NA	NA	NA	NA	NA	NA	NA	NA	NA	773	774	0.000164529	323	324	0.000150004	125	126	0.000157678	189	190	0.000102249	128	129	6.43054e-05	2	3	4.15157e-06	1241	1242	0.00035184	628	629	0.00013592	NA	NA	NA	NA	NA
ASGAFLPL	GCCAGCGGAGCCTTCCTGCCTTTA	WT	123	124	3.3325e-05	65	66	4.87909e-05	307	308	4.92483e-05	NA	NA	NA	NA	NA	NA	NA	NA	NA	100	101	2.14696e-05	45	46	2.12969e-05	16	17	2.1274e-05	10	11	5.9197e-06	121	122	6.0816e-05	103	104	0.000143921	2	3	8.49855e-07	3	4	8.64358e-07	NA	NA	NA	NA	NA
ASGFFSVF	GCATCAGGCTTCTTCTCTGTGTTC	WT	2210	2211	0.000594206	890	891	0.000658677	3321	3322	0.000531178	NA	NA	NA	NA	NA	NA	NA	NA	NA	1395	1396	0.000296748	643	644	0.000298157	257	258	0.000322864	834	835	0.000449359	645	646	0.000322026	1852	1853	0.00256428	2743	2744	0.000777334	998	999	0.000215873	NA	NA	NA	NA	NA
ASHGFYEF	GCGTCACATGGATTCTACGAATTT	WT	3904	3905	0.00104947	1454	1455	0.00107562	7142	7143	0.00114215	NA	NA	NA	NA	NA	NA	NA	NA	NA	2522	2523	0.000536315	993	994	0.000460198	440	441	0.000551873	1806	1807	0.000972445	4966	4967	0.00247601	320	321	0.000444217	2394	2395	0.000678467	3857	3858	0.000833673	NA	NA	NA	NA	NA
ASHQFSPA	GCATCACACCAATTTTCTCCTGCT	WT	729	730	0.000196187	291	292	0.000215863	1322	1323	0.000211544	NA	NA	NA	NA	NA	NA	NA	NA	NA	415	416	8.84293e-05	197	198	9.16693e-05	77	78	9.76102e-05	52	53	2.85222e-05	176	177	8.8233e-05	36	37	5.12026e-05	445	446	0.000126345	440	441	9.52955e-05	NA	NA	NA	NA	NA
ASIFDSRL	GCGAGCATCTTCGATAGCCGATTG	WT	467	468	0.000125775	135	136	0.000100539	852	853	0.000136392	NA	NA	NA	NA	NA	NA	NA	NA	NA	272	273	5.80317e-05	104	105	4.86125e-05	34	35	4.37994e-05	14	15	8.07232e-06	5	6	2.99095e-06	NA	1	1.38386e-06	126	127	3.59772e-05	129	130	2.80916e-05	NA	NA	NA	NA	NA
ASILWYNM	GCGAGCATCTTATGGTATAATATG	WT	1404	1405	0.000377594	573	574	0.000424333	2662	2663	0.000425806	NA	NA	NA	NA	NA	NA	NA	NA	NA	818	819	0.000174095	411	412	0.000190746	168	169	0.000211489	194	195	0.00010494	39	40	1.99397e-05	132	133	0.000184053	151	152	4.30593e-05	350	351	7.58474e-05	NA	NA	NA	NA	NA
ASITFFSP	GCATCTATCACTTTCTTCTCTCCT	WT	6194	6195	0.00166491	2035	2036	0.00150512	9237	9238	0.00147713	NA	NA	NA	NA	NA	NA	NA	NA	NA	3736	3737	0.000794376	1811	1812	0.000838913	621	622	0.000778379	4427	4428	0.00238295	1681	1682	0.000838463	332	333	0.000460824	9934	9935	0.00281444	9894	9895	0.00213821	NA	NA	NA	NA	NA
ASKHFMLF	GCCTCCAAACACTTCATGCTCTTT	WT	1247	1248	0.0003354	374	375	0.000277221	1807	1808	0.000289094	NA	NA	NA	NA	NA	NA	NA	NA	NA	749	750	0.000159428	378	379	0.000175468	103	104	0.000130147	486	487	0.000262081	194	195	9.72059e-05	8	9	1.24547e-05	1450	1451	0.000411046	200	201	4.3434e-05	NA	NA	NA	NA	NA
ASLCIAIL	GCCAGTTTGTGCATTGCCATTCTA	WT	774	775	0.000208281	256	257	0.000189989	1278	1279	0.000204508	NA	NA	NA	NA	NA	NA	NA	NA	NA	502	503	0.000106923	202	203	9.39841e-05	76	77	9.63588e-05	381	382	0.000205575	60	61	3.0408e-05	327	328	0.000453904	79	80	2.26628e-05	27	28	6.05051e-06	NA	NA	NA	NA	NA
ASLELGKL	GCCTCACTAGAGCTCGGTAAATTG	WT	1433	1434	0.000385387	534	535	0.000395502	2686	2687	0.000429644	NA	NA	NA	NA	NA	NA	NA	NA	NA	931	932	0.000198116	408	409	0.000189357	134	135	0.000168941	127	128	6.88838e-05	1795	1796	0.000895291	65	66	9.13344e-05	67	68	1.92634e-05	686	687	0.000148453	NA	NA	NA	NA	NA
ASLFLTGI	GCCTCTCTGTTCCTGACGGGCATT	WT	396	397	0.000106694	152	153	0.000113106	681	682	0.00010905	NA	NA	NA	NA	NA	NA	NA	NA	NA	277	278	5.90946e-05	119	120	5.55571e-05	43	44	5.50622e-05	58	59	3.17511e-05	43	44	2.19336e-05	2	3	4.15157e-06	147	148	4.19262e-05	5100	5101	0.00110227	NA	NA	NA	NA	NA
ASLLMERL	GCGAGCCTTCTGATGGAGAGACTT	WT	1222	1223	0.000328681	369	370	0.000273525	2162	2163	0.000345857	NA	NA	NA	NA	NA	NA	NA	NA	NA	725	726	0.000154326	336	337	0.000156023	115	116	0.000145164	156	157	8.44902e-05	1291	1292	0.000644051	385	386	0.000534168	91	92	2.60622e-05	653	654	0.000141323	NA	NA	NA	NA	NA
ASLPLPSL	GCTAGCTTACCCCTGCCGTCTCTG	WT	220	221	5.93937e-05	111	112	8.27966e-05	416	417	6.66771e-05	NA	NA	NA	NA	NA	NA	NA	NA	NA	149	150	3.18856e-05	69	70	3.24083e-05	32	33	4.12966e-05	194	195	0.00010494	NA	1	4.98492e-07	42	43	5.95058e-05	128	129	3.65438e-05	16	17	3.67352e-06	NA	NA	NA	NA	NA
ASLRYSGV	GCAAGTCTTAGATATTCAGGTGTG	WT	595	596	0.000160175	168	169	0.000124934	802	803	0.000128397	NA	NA	NA	NA	NA	NA	NA	NA	NA	364	365	7.75882e-05	167	168	7.778e-05	61	62	7.75876e-05	93	94	5.05865e-05	7	8	3.98793e-06	3	4	5.53542e-06	39	40	1.13314e-05	21	22	4.75397e-06	NA	NA	NA	NA	NA
ASLSFVDI	GCCAGTTTGTCTTTTGTTGATATC	WT	3498	3499	0.000940356	1254	1255	0.000927766	6178	6179	0.000988004	NA	NA	NA	NA	NA	NA	NA	NA	NA	2166	2167	0.00046064	1022	1023	0.000473624	347	348	0.000435492	4797	4798	0.00258206	492	493	0.000245756	234	235	0.000325206	2350	2351	0.000666003	6422	6423	0.00138794	NA	NA	NA	NA	NA
ASLSLVTL	GCGTCTCTTTCCTTGGTCACCCTG	WT	NA	1	2.6875e-07	NA	1	7.39256e-07	NA	1	1.59897e-07	NA	NA	NA	NA	NA	NA	NA	NA	NA	NA	1	2.1257e-07	NA	1	4.62976e-07	NA	1	1.25141e-06	NA	1	5.38154e-07	NA	1	4.98492e-07	NA	1	1.38386e-06	NA	1	2.83285e-07	NA	1	2.1609e-07	NA	NA	NA	NA	NA
ASLTLTLL	GCCTCGTTGACACTTACGCTTCTT	WT	1876	1877	0.000504444	725	726	0.0005367	3135	3136	0.000501437	NA	NA	NA	NA	NA	NA	NA	NA	NA	1187	1188	0.000252534	570	571	0.000264359	181	182	0.000227757	2722	2723	0.00146539	1867	1868	0.000931182	822	823	0.00113891	854	855	0.000242209	401	402	8.6868e-05	NA	NA	NA	NA	NA
ASLTMSGM	GCTAGTTTAACAATGTCAGGCATG	WT	610	611	0.000164206	269	270	0.000199599	1352	1353	0.000216341	NA	NA	NA	NA	NA	NA	NA	NA	NA	438	439	9.33184e-05	197	198	9.16693e-05	80	81	0.000101364	22	23	1.23775e-05	1266	1267	0.000631589	8	9	1.24547e-05	273	274	7.76201e-05	178	179	3.868e-05	NA	NA	NA	NA	NA
ASMSTYCL	GCTTCAATGTCAACATATTGCCTG	WT	482	483	0.000129806	188	189	0.000139719	1024	1025	0.000163895	NA	NA	NA	NA	NA	NA	NA	NA	NA	325	326	6.92979e-05	173	174	8.05578e-05	69	70	8.75989e-05	4277	4278	0.00230222	19	20	9.96983e-06	8	9	1.24547e-05	16	17	4.81584e-06	858	859	0.000185621	NA	NA	NA	NA	NA
ASNHHYAL	GCATCGAATCACCACTACGCGCTT	WT	163	164	4.4075e-05	76	77	5.69227e-05	213	214	3.4218e-05	NA	NA	NA	NA	NA	NA	NA	NA	NA	94	95	2.01942e-05	48	49	2.26858e-05	17	18	2.25254e-05	23	24	1.29157e-05	109	110	5.48341e-05	NA	1	1.38386e-06	1	2	5.6657e-07	14	15	3.24134e-06	NA	NA	NA	NA	NA
ASNVYGNM	GCGTCAAATGTCTATGGAAACATG	WT	414	415	0.000111531	148	149	0.000110149	557	558	8.92226e-05	NA	NA	NA	NA	NA	NA	NA	NA	NA	248	249	5.293e-05	94	95	4.39827e-05	38	39	4.88051e-05	136	137	7.37271e-05	69	70	3.48944e-05	3	4	5.53542e-06	22	23	6.51555e-06	1437	1438	0.000310737	NA	NA	NA	NA	NA
ASNYFRAM	GCATCCAATTACTTCCGCGCGATG	WT	270	271	7.28312e-05	107	108	7.98396e-05	421	422	6.74766e-05	NA	NA	NA	NA	NA	NA	NA	NA	NA	164	165	3.50741e-05	66	67	3.10194e-05	18	19	2.37768e-05	94	95	5.11247e-05	1493	1494	0.000744746	1	2	2.76771e-06	6	7	1.98299e-06	15	16	3.45743e-06	NA	NA	NA	NA	NA
ASPSHWPL	GCTTCTCCTAGTCACTGGCCACTA	WT	1015	1016	0.00027305	352	353	0.000260957	1449	1450	0.000231851	NA	NA	NA	NA	NA	NA	NA	NA	NA	553	554	0.000117764	267	268	0.000124078	99	100	0.000125141	1101	1102	0.000593046	230	231	0.000115152	214	215	0.000297529	2055	2056	0.000582434	309	310	6.69877e-05	NA	NA	NA	NA	NA
ASPTFRRL	GCATCTCCGACATTCCGGCGTCTC	WT	1703	1704	0.00045795	511	512	0.000378499	2700	2701	0.000431882	NA	NA	NA	NA	NA	NA	NA	NA	NA	1004	1005	0.000213633	435	436	0.000201858	185	186	0.000232763	243	244	0.00013131	231	232	0.00011565	9	10	1.38386e-05	815	816	0.00023116	2233	2234	0.000482744	NA	NA	NA	NA	NA
ASQYSPML	GCGTCTCAGTACAGTCCGATGCTT	WT	524	525	0.000141094	205	206	0.000152287	932	933	0.000149184	NA	NA	NA	NA	NA	NA	NA	NA	NA	338	339	7.20614e-05	151	152	7.03724e-05	46	47	5.88164e-05	66	67	3.60563e-05	40	41	2.04382e-05	2	3	4.15157e-06	NA	1	2.83285e-07	197	198	4.27857e-05	NA	NA	NA	NA	NA
ASRQFHAI	GCAAGCAGGCAGTTCCATGCGATA	WT	452	453	0.000121744	133	134	9.90603e-05	657	658	0.000105212	NA	NA	NA	NA	NA	NA	NA	NA	NA	267	268	5.69689e-05	97	98	4.53717e-05	46	47	5.88164e-05	36	37	1.99117e-05	19	20	9.96983e-06	17	18	2.49094e-05	378	379	0.000107365	44	45	9.72403e-06	NA	NA	NA	NA	NA
ASRVYYIM	GCCAGTCGGGTATATTACATCATG	WT	535	536	0.00014405	197	198	0.000146373	888	889	0.000142149	NA	NA	NA	NA	NA	NA	NA	NA	NA	309	310	6.58968e-05	142	143	6.62056e-05	56	57	7.13305e-05	11	12	6.45785e-06	277	278	0.000138581	3	4	5.53542e-06	76	77	2.18129e-05	72	73	1.57745e-05	NA	NA	NA	NA	NA
ASSAYHQL	GCCAGTTCTGCATACCATCAGCTC	WT	2798	2799	0.000752231	965	966	0.000714121	4629	4630	0.000740324	NA	NA	NA	NA	NA	NA	NA	NA	NA	1570	1571	0.000333948	688	689	0.00031899	258	259	0.000324116	901	902	0.000485415	217	218	0.000108671	48	49	6.78089e-05	813	814	0.000230594	670	671	0.000144996	NA	NA	NA	NA	NA
ASSFFAFL	GCCTCCAGTTTCTTTGCGTTCCTC	WT	1592	1593	0.000428119	493	494	0.000365192	2483	2484	0.000397184	NA	NA	NA	NA	NA	NA	NA	NA	NA	976	977	0.000207681	444	445	0.000206024	147	148	0.000185209	343	344	0.000185125	2516	2517	0.0012547	438	439	0.000607512	2943	2944	0.000833991	529	530	0.000114527	NA	NA	NA	NA	NA
ASSGYGSL	GCTTCATCCGGATACGGTTCGTTA	WT	1622	1623	0.000436181	589	590	0.000436161	2779	2780	0.000444514	NA	NA	NA	NA	NA	NA	NA	NA	NA	1028	1029	0.000218735	421	422	0.000195376	159	160	0.000200226	330	331	0.000178129	3743	3744	0.00186635	46	47	6.50412e-05	231	232	6.57221e-05	756	757	0.00016358	NA	NA	NA	NA	NA
ASSLFLMI	GCCTCGAGCTTATTCCTGATGATC	WT	1622	1623	0.000436181	676	677	0.000500476	2885	2886	0.000461463	NA	NA	NA	NA	NA	NA	NA	NA	NA	946	947	0.000201304	495	496	0.000229636	148	149	0.00018646	580	581	0.000312668	389	390	0.000194412	38	39	5.39703e-05	930	931	0.000263738	1389	1390	0.000300364	NA	NA	NA	NA	NA
ASSPFSTL	GCAAGTTCCCCGTTTTCCACGTTA	WT	3319	3320	0.00089225	1252	1253	0.000926287	5859	5860	0.000936997	NA	NA	NA	NA	NA	NA	NA	NA	NA	2059	2060	0.000437895	946	947	0.000438438	323	324	0.000405458	163	164	8.82573e-05	94	95	4.73567e-05	382	383	0.000530017	2319	2320	0.000657221	2958	2959	0.000639409	NA	NA	NA	NA	NA
ASSWLLHL	GCCTCTTCGTGGCTGCTGCATCTT	WT	694	695	0.000186781	244	245	0.000181118	1256	1257	0.000200991	NA	NA	NA	NA	NA	NA	NA	NA	NA	491	492	0.000104585	226	227	0.000105096	71	72	9.01017e-05	223	224	0.000120547	41	42	2.09366e-05	81	82	0.000113476	479	480	0.000135977	469	470	0.000101562	NA	NA	NA	NA	NA
ASTLLASL	GCCTCCACATTGTTGGCATCTCTC	WT	524	525	0.000141094	185	186	0.000137502	875	876	0.00014007	NA	NA	NA	NA	NA	NA	NA	NA	NA	282	283	6.01574e-05	164	165	7.6391e-05	44	45	5.63136e-05	37	38	2.04499e-05	42	43	2.14351e-05	5	6	8.30313e-06	615	616	0.000174504	1786	1787	0.000386152	NA	NA	NA	NA	NA
ASVVFEGV	GCTTCAGTTGTATTTGAGGGCGTC	WT	359	360	9.675e-05	134	135	9.97995e-05	487	488	7.80298e-05	NA	NA	NA	NA	NA	NA	NA	NA	NA	250	251	5.33552e-05	103	104	4.81495e-05	32	33	4.12966e-05	25	26	1.3992e-05	45	46	2.29306e-05	54	55	7.6112e-05	13	14	3.96599e-06	80	81	1.75032e-05	NA	NA	NA	NA	NA
ASWACGSL	GCAAGCTGGGCCTGCGGCAGCTTG	WT	72	73	1.96187e-05	42	43	3.1788e-05	108	109	1.74288e-05	NA	NA	NA	NA	NA	NA	NA	NA	NA	65	66	1.40296e-05	21	22	1.01855e-05	6	7	8.75989e-06	NA	1	5.38154e-07	3	4	1.99397e-06	NA	1	1.38386e-06	1	2	5.6657e-07	1	2	4.32179e-07	NA	NA	NA	NA	NA
ASWFSGAL	GCCTCCTGGTTCTCAGGTGCATTA	WT	433	434	0.000116637	167	168	0.000124195	669	670	0.000107131	NA	NA	NA	NA	NA	NA	NA	NA	NA	266	267	5.67563e-05	116	117	5.41682e-05	24	25	3.12853e-05	1	2	1.07631e-06	22	23	1.14653e-05	169	170	0.000235255	923	924	0.000261755	30	31	6.69877e-06	NA	NA	NA	NA	NA
ASWHKLGL	GCATCTTGGCACAAGCTTGGGTTG	WT	1141	1142	0.000306912	425	426	0.000314923	1979	1980	0.000316596	NA	NA	NA	NA	NA	NA	NA	NA	NA	720	721	0.000153263	305	306	0.000141671	117	118	0.000147667	559	560	0.000301366	132	133	6.62994e-05	50	51	7.05766e-05	266	267	7.56371e-05	394	395	8.53554e-05	NA	NA	NA	NA	NA
ASWLFKNA	GCCTCCTGGCTCTTTAAGAATGCA	WT	711	712	0.00019135	224	225	0.000166333	941	942	0.000150623	NA	NA	NA	NA	NA	NA	NA	NA	NA	380	381	8.09893e-05	196	197	9.12063e-05	73	74	9.26045e-05	32	33	1.77591e-05	224	225	0.000112161	138	139	0.000192356	25	26	7.36541e-06	36	37	7.99531e-06	NA	NA	NA	NA	NA
ASWTCASV	GCGTCCTGGACCTGTGCCTCAGTC	WT	NA	1	2.6875e-07	NA	1	7.39256e-07	NA	1	1.59897e-07	NA	NA	NA	NA	NA	NA	NA	NA	NA	NA	1	2.1257e-07	NA	1	4.62976e-07	NA	1	1.25141e-06	NA	1	5.38154e-07	NA	1	4.98492e-07	NA	1	1.38386e-06	NA	1	2.83285e-07	NA	1	2.1609e-07	NA	NA	NA	NA	NA
ASWTLEEL	GCCAGTTGGACTCTAGAAGAATTA	WT	282	283	7.60562e-05	115	116	8.57537e-05	535	536	8.57048e-05	NA	NA	NA	NA	NA	NA	NA	NA	NA	179	180	3.82627e-05	69	70	3.24083e-05	18	19	2.37768e-05	456	457	0.000245937	2	3	1.49547e-06	740	741	0.00102544	3	4	1.13314e-06	79	80	1.72872e-05	NA	NA	NA	NA	NA
ASWVLRSL	GCAAGCTGGGTCCTACGCTCCTTG	WT	227	228	6.1275e-05	57	58	4.28768e-05	377	378	6.04411e-05	NA	NA	NA	NA	NA	NA	NA	NA	NA	131	132	2.80593e-05	47	48	2.22228e-05	20	21	2.62797e-05	20	21	1.13012e-05	581	582	0.000290122	2	3	4.15157e-06	1071	1072	0.000303681	29	30	6.48269e-06	NA	NA	NA	NA	NA
ASYFIRNM	GCTAGTTATTTTATTCGAAATATG	WT	2136	2137	0.000574319	742	743	0.000549267	3748	3749	0.000599454	NA	NA	NA	NA	NA	NA	NA	NA	NA	1418	1419	0.000301637	538	539	0.000249544	199	200	0.000250283	482	483	0.000259929	1797	1798	0.000896288	325	326	0.000451137	368	369	0.000104532	502	503	0.000108693	NA	NA	NA	NA	NA
ASYGHVDV	GCGTCGTATGGTCATGTCGATGTT	WT	725	726	0.000195112	270	271	0.000200338	1203	1204	0.000192516	NA	NA	NA	NA	NA	NA	NA	NA	NA	435	436	9.26807e-05	189	190	8.79654e-05	80	81	0.000101364	675	676	0.000363792	130	131	6.53024e-05	17	18	2.49094e-05	1616	1617	0.000458072	70	71	1.53424e-05	NA	NA	NA	NA	NA
ASYGQSGL	GCGTCCTACGGACAGAGTGGCCTC	WT	NA	1	2.6875e-07	3	4	2.95702e-06	NA	1	1.59897e-07	NA	NA	NA	NA	NA	NA	NA	NA	NA	2	3	6.37711e-07	2	3	1.38893e-06	NA	1	1.25141e-06	NA	1	5.38154e-07	NA	1	4.98492e-07	NA	1	1.38386e-06	NA	1	2.83285e-07	NA	1	2.1609e-07	NA	NA	NA	NA	NA
ASYIRIAM	GCAAGTTATATTAGAATTGCAATG	WT	710	711	0.000191081	250	251	0.000185553	1336	1337	0.000213782	NA	NA	NA	NA	NA	NA	NA	NA	NA	476	477	0.000101396	192	193	8.93544e-05	60	61	7.63362e-05	763	764	0.00041115	37	38	1.89427e-05	3	4	5.53542e-06	1246	1247	0.000353256	220	221	4.77558e-05	NA	NA	NA	NA	NA
ASYIRIVM	GCCAGCTACATCCGTATTGTAATG	WT	470	471	0.000126581	172	173	0.000127891	807	808	0.000129197	NA	NA	NA	NA	NA	NA	NA	NA	NA	279	280	5.95197e-05	145	146	6.75945e-05	47	48	6.00678e-05	NA	1	5.38154e-07	96	97	4.83537e-05	70	71	9.82537e-05	63	64	1.81302e-05	1031	1032	0.000223004	NA	NA	NA	NA	NA
ASYKDVLL	GCTAGCTATAAAGATGTTCTTTTA	WT	837	838	0.000225212	312	313	0.000231387	1362	1363	0.00021794	NA	NA	NA	NA	NA	NA	NA	NA	NA	522	523	0.000111174	233	234	0.000108336	83	84	0.000105119	112	113	6.08114e-05	499	500	0.000249246	156	157	0.000217265	1530	1531	0.000433709	711	712	0.000153856	NA	NA	NA	NA	NA
ASYLLKPI	GCTAGTTACTTGCTAAAACCGATC	WT	815	816	0.0002193	330	331	0.000244694	1276	1277	0.000204189	NA	NA	NA	NA	NA	NA	NA	NA	NA	502	503	0.000106923	195	196	9.07433e-05	68	69	8.63475e-05	24	25	1.34539e-05	168	169	8.42451e-05	2	3	4.15157e-06	330	331	9.37673e-05	308	309	6.67717e-05	NA	NA	NA	NA	NA
ASYLQNLL	GCATCCTACCTTCAAAACCTGTTA	WT	1746	1747	0.000469506	561	562	0.000415462	3085	3086	0.000493442	NA	NA	NA	NA	NA	NA	NA	NA	NA	1182	1183	0.000251471	496	497	0.000230099	201	202	0.000252785	483	484	0.000260467	1369	1370	0.000682933	1210	1211	0.00167585	1293	1294	0.000366571	903	904	0.000195345	NA	NA	NA	NA	NA
ASYLSWRL	GCAAGTTATTTATCATGGCGGCTA	WT	1787	1788	0.000480525	642	643	0.000475341	3124	3125	0.000499678	NA	NA	NA	NA	NA	NA	NA	NA	NA	1045	1046	0.000222349	447	448	0.000207413	188	189	0.000236517	335	336	0.00018082	263	264	0.000131602	11	12	1.66063e-05	5846	5847	0.00165637	844	845	0.000182596	NA	NA	NA	NA	NA
ATAIFLIL	GCCACGGCGATCTTCTTAATCCTA	WT	7930	7931	0.00213146	2807	2808	0.00207583	13721	13722	0.00219411	NA	NA	NA	NA	NA	NA	NA	NA	NA	5116	5117	0.00108772	2365	2366	0.0010954	757	758	0.000948571	3558	3559	0.00191529	2319	2320	0.0011565	399	400	0.000553542	6037	6038	0.00171047	3791	3792	0.000819411	NA	NA	NA	NA	NA
ATFELIEL	GCAACATTTGAGCTAATCGAACTA	WT	161	162	4.35375e-05	68	69	5.10086e-05	217	218	3.48576e-05	NA	NA	NA	NA	NA	NA	NA	NA	NA	103	104	2.21073e-05	43	44	2.03709e-05	17	18	2.25254e-05	NA	1	5.38154e-07	NA	1	4.98492e-07	NA	1	1.38386e-06	1	2	5.6657e-07	NA	1	2.1609e-07	NA	NA	NA	NA	NA
ATFFLTCI	GCGACGTTCTTCTTGACATGTATT	WT	1886	1887	0.000507131	622	623	0.000460556	2989	2990	0.000478092	NA	NA	NA	NA	NA	NA	NA	NA	NA	1080	1081	0.000229789	484	485	0.000224543	185	186	0.000232763	469	470	0.000252933	449	450	0.000224321	84	85	0.000117628	1378	1379	0.00039065	6186	6187	0.00133695	NA	NA	NA	NA	NA
ATFIREVL	GCAACGTTTATCCGTGAGGTCCTT	WT	583	584	0.00015695	177	178	0.000131588	928	929	0.000148544	NA	NA	NA	NA	NA	NA	NA	NA	NA	302	303	6.44088e-05	138	139	6.43537e-05	67	68	8.50961e-05	24	25	1.34539e-05	212	213	0.000106179	6	7	9.68699e-06	501	502	0.000142209	64	65	1.40458e-05	NA	NA	NA	NA	NA
ATFQFTFC	GCTACATTTCAGTTTACATTTTGT	WT	3385	3386	0.000909987	1085	1086	0.000802832	5387	5388	0.000861526	NA	NA	NA	NA	NA	NA	NA	NA	NA	1962	1963	0.000417276	963	964	0.000446309	354	355	0.000444251	2292	2293	0.00123399	145	146	7.27798e-05	157	158	0.000218649	1050	1051	0.000297732	3393	3394	0.000733408	NA	NA	NA	NA	NA
ATFQINPF	GCGACATTCCAGATTAACCCATTC	WT	1454	1455	0.000391031	527	528	0.000390327	2593	2594	0.000414773	NA	NA	NA	NA	NA	NA	NA	NA	NA	874	875	0.000185999	436	437	0.000202321	172	173	0.000216494	975	976	0.000525239	805	806	0.000401784	56	57	7.88797e-05	92	93	2.63455e-05	3797	3798	0.000820708	NA	NA	NA	NA	NA
ATFWFCTW	GCGACGTTTTGGTTCTGTACCTGG	WT	378	379	0.000101856	175	176	0.000130109	746	747	0.000119443	NA	NA	NA	NA	NA	NA	NA	NA	NA	282	283	6.01574e-05	104	105	4.86125e-05	68	69	8.63475e-05	157	158	8.50284e-05	7	8	3.98793e-06	5	6	8.30313e-06	2	3	8.49855e-07	233	234	5.05649e-05	NA	NA	NA	NA	NA
ATHEYRTL	GCGACACACGAGTACAGAACCTTG	WT	335	336	9.03e-05	115	116	8.57537e-05	657	658	0.000105212	NA	NA	NA	NA	NA	NA	NA	NA	NA	203	204	4.33644e-05	84	85	3.9353e-05	30	31	3.87938e-05	57	58	3.1213e-05	432	433	0.000215847	1	2	2.76771e-06	32	33	9.3484e-06	294	295	6.37464e-05	NA	NA	NA	NA	NA
ATHPLFSL	GCCACACACCCTCTCTTTAGCCTC	WT	50	51	1.37062e-05	23	24	1.77421e-05	39	40	6.39588e-06	NA	NA	NA	NA	NA	NA	NA	NA	NA	31	32	6.80225e-06	12	13	6.01869e-06	3	4	5.00565e-06	1500	1501	0.00080777	1	2	9.96983e-07	NA	1	1.38386e-06	3	4	1.13314e-06	2030	2031	0.000438878	NA	NA	NA	NA	NA
ATIAFHQM	GCCACGATTGCATTTCATCAGATG	WT	1262	1263	0.000339431	461	462	0.000341536	2303	2304	0.000368403	NA	NA	NA	NA	NA	NA	NA	NA	NA	826	827	0.000175796	336	337	0.000156023	151	152	0.000190215	907	908	0.000488644	600	601	0.000299593	141	142	0.000196507	683	684	0.000193767	2310	2311	0.000499383	NA	NA	NA	NA	NA
ATIFFTRL	GCGACTATATTCTTTACTCGGTTA	WT	661	662	0.000177912	268	269	0.00019886	1160	1161	0.000185641	NA	NA	NA	NA	NA	NA	NA	NA	NA	399	400	8.50282e-05	202	203	9.39841e-05	70	71	8.88503e-05	250	251	0.000135077	64	65	3.2402e-05	63	64	8.85667e-05	2299	2300	0.000651555	166	167	3.60869e-05	NA	NA	NA	NA	NA
ATKAFHTL	GCCACTAAGGCCTTCCATACTCTT	WT	198	199	5.34812e-05	57	58	4.28768e-05	243	244	3.90149e-05	NA	NA	NA	NA	NA	NA	NA	NA	NA	91	92	1.95565e-05	32	33	1.52782e-05	18	19	2.37768e-05	11	12	6.45785e-06	5	6	2.99095e-06	1050	1051	0.00145443	1	2	5.6657e-07	2	3	6.48269e-07	NA	NA	NA	NA	NA
ATLDYMHL	GCTACATTGGACTACATGCACCTG	WT	1464	1465	0.000393719	420	421	0.000311227	2576	2577	0.000412055	NA	NA	NA	NA	NA	NA	NA	NA	NA	905	906	0.000192589	403	404	0.000187042	152	153	0.000191466	518	519	0.000279302	546	547	0.000272675	9	10	1.38386e-05	36	37	1.04815e-05	10260	10261	0.00221729	NA	NA	NA	NA	NA
ATMLHVEL	GCTACAATGCTCCATGTAGAGTTA	WT	1611	1612	0.000433225	598	599	0.000442814	2898	2899	0.000463542	NA	NA	NA	NA	NA	NA	NA	NA	NA	1014	1015	0.000215759	400	401	0.000185653	176	177	0.0002215	813	814	0.000438058	397	398	0.0001984	76	77	0.000106557	374	375	0.000106232	3094	3095	0.000668797	NA	NA	NA	NA	NA
ATPEWAAL	GCAACTCCAGAGTGGGCCGCGTTA	WT	241	242	6.50375e-05	109	110	8.13181e-05	512	513	8.20272e-05	NA	NA	NA	NA	NA	NA	NA	NA	NA	168	169	3.59244e-05	55	56	2.59267e-05	31	32	4.00452e-05	4	5	2.69077e-06	63	64	3.19035e-05	262	263	0.000363954	2	3	8.49855e-07	560	561	0.000121226	NA	NA	NA	NA	NA
ATPRMIGL	GCTACACCACGTATGATCGGTTTG	WT	868	869	0.000233544	334	335	0.000247651	1512	1513	0.000241924	NA	NA	NA	NA	NA	NA	NA	NA	NA	556	557	0.000118402	195	196	9.07433e-05	98	99	0.00012389	78	79	4.25142e-05	83	84	4.18733e-05	491	492	0.000680857	46	47	1.33144e-05	773	774	0.000167253	NA	NA	NA	NA	NA
ATPWFVTI	GCGACCCCGTGGTTTGTGACCATT	WT	611	612	0.000164475	222	223	0.000164854	1089	1090	0.000174288	NA	NA	NA	NA	NA	NA	NA	NA	NA	416	417	8.86419e-05	153	154	7.12983e-05	61	62	7.75876e-05	116	117	6.29641e-05	161	162	8.07556e-05	362	363	0.000502339	124	125	3.54106e-05	1675	1676	0.000362166	NA	NA	NA	NA	NA
ATTYFTRL	GCGACCACTTATTTTACACGGCTG	WT	80	81	2.17687e-05	21	22	1.62636e-05	152	153	2.44643e-05	NA	NA	NA	NA	NA	NA	NA	NA	NA	55	56	1.19039e-05	30	31	1.43523e-05	19	20	2.50283e-05	NA	1	5.38154e-07	65	66	3.29004e-05	NA	1	1.38386e-06	NA	1	2.83285e-07	1	2	4.32179e-07	NA	NA	NA	NA	NA
ATVIRSPL	GCAACGGTCATACGGAGCCCGCTA	WT	776	777	0.000208819	251	252	0.000186292	1590	1591	0.000254396	NA	NA	NA	NA	NA	NA	NA	NA	NA	438	439	9.33184e-05	187	188	8.70395e-05	59	60	7.50848e-05	140	141	7.58798e-05	479	480	0.000239276	12	13	1.79901e-05	44	45	1.27478e-05	2829	2830	0.000611533	NA	NA	NA	NA	NA
ATWRQIML	GCTACCTGGCGTCAGATAATGCTT	WT	827	828	0.000222525	252	253	0.000187032	1335	1336	0.000213623	NA	NA	NA	NA	NA	NA	NA	NA	NA	436	437	9.28933e-05	193	194	8.98174e-05	90	91	0.000113879	77	78	4.1976e-05	7909	7910	0.00394307	204	205	0.00028369	88	89	2.52124e-05	136	137	2.96043e-05	NA	NA	NA	NA	NA
ATWSQTSL	GCGACATGGTCTCAAACAAGCCTC	WT	58	59	1.58562e-05	20	21	1.55244e-05	130	131	2.09465e-05	NA	NA	NA	NA	NA	NA	NA	NA	NA	61	62	1.31794e-05	16	17	7.87059e-06	6	7	8.75989e-06	7	8	4.30523e-06	NA	1	4.98492e-07	1	2	2.76771e-06	14	15	4.24927e-06	NA	1	2.1609e-07	NA	NA	NA	NA	NA
ATYRRLCL	GCCACCTATAGGAGGCTCTGCTTG	WT	1343	1344	0.0003612	548	549	0.000405851	2381	2382	0.000380875	NA	NA	NA	NA	NA	NA	NA	NA	NA	863	864	0.000183661	342	343	0.000158801	155	156	0.00019522	274	275	0.000147992	237	238	0.000118641	497	498	0.00068916	233	234	6.62887e-05	923	924	0.000199667	NA	NA	NA	NA	NA
ATYSFCAF	GCAACATATTCCTTCTGCGCATTT	WT	393	394	0.000105887	92	93	6.87508e-05	522	523	8.36262e-05	NA	NA	NA	NA	NA	NA	NA	NA	NA	211	212	4.50649e-05	81	82	3.7964e-05	41	42	5.25593e-05	32	33	1.77591e-05	105	106	5.28401e-05	1	2	2.76771e-06	129	130	3.6827e-05	128	129	2.78755e-05	NA	NA	NA	NA	NA
ATYTERAL	GCTACCTATACGGAGCGTGCACTG	WT	783	784	0.0002107	373	374	0.000276482	1428	1429	0.000228493	NA	NA	NA	NA	NA	NA	NA	NA	NA	519	520	0.000110537	272	273	0.000126392	95	96	0.000120136	602	603	0.000324507	325	326	0.000162508	301	302	0.000417924	377	378	0.000107082	407	408	8.81645e-05	NA	NA	NA	NA	NA
ATYYFTTF	GCCACATATTATTTTACGACTTTT	WT	1367	1368	0.00036765	417	418	0.000309009	2003	2004	0.000320434	NA	NA	NA	NA	NA	NA	NA	NA	NA	941	942	0.000200241	420	421	0.000194913	128	129	0.000161432	20286	20287	0.0109175	152	153	7.62692e-05	583	584	0.000808171	76	77	2.18129e-05	20771	20772	0.00448861	NA	NA	NA	NA	NA
ATYYGAFI	GCGACGTATTACGGGGCGTTTATT	WT	161	162	4.35375e-05	63	64	4.73124e-05	338	339	5.42051e-05	NA	NA	NA	NA	NA	NA	NA	NA	NA	117	118	2.50833e-05	45	46	2.12969e-05	21	22	2.75311e-05	33	34	1.82972e-05	NA	1	4.98492e-07	NA	1	1.38386e-06	17	18	5.09913e-06	96	97	2.09607e-05	NA	NA	NA	NA	NA
AVDLYSML	GCTGTAGACCTTTATTCGATGTTG	WT	573	574	0.000154262	220	221	0.000163376	1216	1217	0.000194595	NA	NA	NA	NA	NA	NA	NA	NA	NA	420	421	8.94921e-05	198	199	9.21322e-05	76	77	9.63588e-05	5804	5805	0.00312399	238	239	0.000119139	17	18	2.49094e-05	5942	5943	0.00168356	258	259	5.59672e-05	NA	NA	NA	NA	NA
AVEEFHNL	GCGGTGGAGGAATTTCACAACCTC	WT	666	667	0.000179256	234	235	0.000173725	1187	1188	0.000189958	NA	NA	NA	NA	NA	NA	NA	NA	NA	414	415	8.82167e-05	183	184	8.51876e-05	70	71	8.88503e-05	51	52	2.7984e-05	58	59	2.9411e-05	1	2	2.76771e-06	258	259	7.33708e-05	314	315	6.80682e-05	NA	NA	NA	NA	NA
AVFAATGI	GCTGTATTCGCCGCTACTGGTATT	WT	955	956	0.000256925	290	291	0.000215123	1608	1609	0.000257274	NA	NA	NA	NA	NA	NA	NA	NA	NA	599	600	0.000127542	254	255	0.000118059	95	96	0.000120136	332	333	0.000179205	12	13	6.48039e-06	85	86	0.000119012	852	853	0.000241642	547	548	0.000118417	NA	NA	NA	NA	NA
AVFFFIYL	GCTGTTTTCTTCTTTATCTATTTA	WT	3254	3255	0.000874781	1061	1062	0.00078509	4699	4700	0.000751516	NA	NA	NA	NA	NA	NA	NA	NA	NA	1977	1978	0.000420464	971	972	0.000450013	329	330	0.000412966	673	674	0.000362716	984	985	0.000491014	2622	2623	0.00362985	1773	1774	0.000502547	2832	2833	0.000612182	NA	NA	NA	NA	NA
AVFIRASV	GCTGTTTTCATACGAGCCTCGGTT	WT	189	190	5.10625e-05	80	81	5.98797e-05	358	359	5.74031e-05	NA	NA	NA	NA	NA	NA	NA	NA	NA	126	127	2.69964e-05	73	74	3.42602e-05	36	37	4.63023e-05	7	8	4.30523e-06	41	42	2.09366e-05	5	6	8.30313e-06	5	6	1.69971e-06	519	520	0.000112367	NA	NA	NA	NA	NA
AVFLGAEI	GCGGTGTTCCTTGGCGCGGAAATC	WT	2098	2099	0.000564106	642	643	0.000475341	3184	3185	0.000509272	NA	NA	NA	NA	NA	NA	NA	NA	NA	1097	1098	0.000233402	509	510	0.000236118	171	172	0.000215243	737	738	0.000397158	164	165	8.22511e-05	315	316	0.000437298	772	773	0.000218979	841	842	0.000181947	NA	NA	NA	NA	NA
AVFLIALV	GCCGTATTTCTTATAGCTTTAGTC	WT	1791	1792	0.0004816	632	633	0.000467949	3097	3098	0.000495361	NA	NA	NA	NA	NA	NA	NA	NA	NA	1101	1102	0.000234253	501	502	0.000232414	186	187	0.000234014	541	542	0.00029168	125	126	6.28099e-05	5134	5135	0.0071061	2993	2994	0.000848155	898	899	0.000194264	NA	NA	NA	NA	NA
AVFLLRLM	GCTGTCTTTCTATTAAGGCTGATG	WT	2170	2171	0.000583456	747	748	0.000552963	3497	3498	0.00055932	NA	NA	NA	NA	NA	NA	NA	NA	NA	1319	1320	0.000280593	616	617	0.000285656	247	248	0.00031035	397	398	0.000214185	71	72	3.58914e-05	413	414	0.000572916	2485	2486	0.000704246	2402	2403	0.000519263	NA	NA	NA	NA	NA
AVFLVGVL	GCAGTGTTCCTTGTAGGGGTCTTA	WT	1036	1037	0.000278694	384	385	0.000284613	1811	1812	0.000289734	NA	NA	NA	NA	NA	NA	NA	NA	NA	629	630	0.000133919	233	234	0.000108336	100	101	0.000126393	102	103	5.54299e-05	787	788	0.000392811	257	258	0.000357035	68	69	1.95467e-05	230	231	4.99167e-05	NA	NA	NA	NA	NA
AVFRVGSV	GCAGTGTTTAGGGTGGGGTCAGTC	WT	392	393	0.000105619	131	132	9.75817e-05	778	779	0.00012456	NA	NA	NA	NA	NA	NA	NA	NA	NA	252	253	5.37803e-05	114	115	5.32422e-05	38	39	4.88051e-05	24	25	1.34539e-05	77	78	3.88823e-05	7	8	1.10708e-05	13	14	3.96599e-06	589	590	0.000127493	NA	NA	NA	NA	NA
AVFVKNEL	GCCGTCTTCGTAAAGAACGAATTA	WT	555	556	0.000149425	157	158	0.000116802	896	897	0.000143428	NA	NA	NA	NA	NA	NA	NA	NA	NA	283	284	6.037e-05	129	130	6.01869e-05	59	60	7.50848e-05	15	16	8.61047e-06	8	9	4.48642e-06	33	34	4.70511e-05	137	138	3.90933e-05	65	66	1.42619e-05	NA	NA	NA	NA	NA
AVFVLTGL	GCGGTTTTCGTACTGACGGGATTG	WT	551	552	0.00014835	215	216	0.000159679	1220	1221	0.000195234	NA	NA	NA	NA	NA	NA	NA	NA	NA	396	397	8.43904e-05	160	161	7.45391e-05	68	69	8.63475e-05	184	185	9.95586e-05	2	3	1.49547e-06	6	7	9.68699e-06	83	84	2.37959e-05	456	457	9.87529e-05	NA	NA	NA	NA	NA
AVFWHSSA	GCGGTCTTCTGGCACTCTTCTGCT	WT	4072	4073	0.00109462	1440	1441	0.00106527	6614	6615	0.00105772	NA	NA	NA	NA	NA	NA	NA	NA	NA	2454	2455	0.00052186	1142	1143	0.000529182	407	408	0.000510576	2151	2152	0.00115811	4729	4730	0.00235787	5043	5044	0.00698017	2819	2820	0.000798863	10121	10122	0.00218726	NA	NA	NA	NA	NA
AVFYAACV	GCTGTGTTCTATGCAGCATGCGTG	WT	362	363	9.75562e-05	186	187	0.000138241	631	632	0.000101055	NA	NA	NA	NA	NA	NA	NA	NA	NA	264	265	5.63312e-05	109	110	5.09274e-05	40	41	5.13079e-05	352	353	0.000189968	8	9	4.48642e-06	36	37	5.12026e-05	6	7	1.98299e-06	332	333	7.19578e-05	NA	NA	NA	NA	NA
AVFYICIL	GCCGTGTTCTACATTTGTATCCTC	WT	1448	1449	0.000389419	542	543	0.000401416	2313	2314	0.000370002	NA	NA	NA	NA	NA	NA	NA	NA	NA	830	831	0.000176646	441	442	0.000204635	125	126	0.000157678	1193	1194	0.000642556	1703	1704	0.00084943	484	485	0.00067117	668	669	0.000189518	105	106	2.29055e-05	NA	NA	NA	NA	NA
AVFYIPMF	GCTGTTTTCTACATTCCGATGTTT	WT	3168	3169	0.000851669	1096	1097	0.000810963	5799	5800	0.000927403	NA	NA	NA	NA	NA	NA	NA	NA	NA	2079	2080	0.000442146	993	994	0.000460198	301	302	0.000377927	1887	1888	0.00101604	864	865	0.000431195	217	218	0.00030168	797	798	0.000226061	4185	4186	0.000904551	NA	NA	NA	NA	NA
AVGFFISL	GCGGTAGGTTTCTTCATATCGCTT	WT	1446	1447	0.000388881	546	547	0.000404373	2536	2537	0.000405659	NA	NA	NA	NA	NA	NA	NA	NA	NA	802	803	0.000170694	427	428	0.000198154	134	135	0.000168941	225	226	0.000121623	1698	1699	0.000846937	9	10	1.38386e-05	370	371	0.000105099	707	708	0.000152991	NA	NA	NA	NA	NA
AVGWFHSL	GCCGTCGGATGGTTCCACTCTTTG	WT	1404	1405	0.000377594	450	451	0.000333404	2226	2227	0.000356091	NA	NA	NA	NA	NA	NA	NA	NA	NA	765	766	0.000162829	341	342	0.000158338	147	148	0.000185209	1514	1515	0.000815304	8118	8119	0.00404725	31	32	4.42834e-05	806	807	0.000228611	2407	2408	0.000520344	NA	NA	NA	NA	NA
AVHFFTGM	GCTGTACACTTCTTTACAGGTATG	WT	3971	3972	0.00106747	1315	1316	0.00097286	6720	6721	0.00107467	NA	NA	NA	NA	NA	NA	NA	NA	NA	2363	2364	0.000502516	1073	1074	0.000497236	420	421	0.000526845	723	724	0.000389624	541	542	0.000270182	364	365	0.000505107	741	742	0.000210197	2223	2224	0.000480583	NA	NA	NA	NA	NA
AVHLFALL	GCCGTCCATTTGTTCGCTCTACTC	WT	1372	1373	0.000368994	497	498	0.000368149	2355	2356	0.000376718	NA	NA	NA	NA	NA	NA	NA	NA	NA	913	914	0.000194289	307	308	0.000142597	141	142	0.000177701	665	666	0.000358411	329	330	0.000164502	8	9	1.24547e-05	19312	19313	0.00547108	231	232	5.01328e-05	NA	NA	NA	NA	NA
AVHLFVLV	GCAGTGCATTTGTTTGTGCTGGTA	WT	690	691	0.000185706	257	258	0.000190728	1323	1324	0.000211704	NA	NA	NA	NA	NA	NA	NA	NA	NA	477	478	0.000101609	220	221	0.000102318	63	64	8.00904e-05	25	26	1.3992e-05	69	70	3.48944e-05	34	35	4.84349e-05	302	303	8.58353e-05	30	31	6.69877e-06	NA	NA	NA	NA	NA
AVHWVATL	GCAGTTCATTGGGTAGCTACCCTT	WT	419	420	0.000112875	177	178	0.000131588	809	810	0.000129517	NA	NA	NA	NA	NA	NA	NA	NA	NA	307	308	6.54717e-05	159	160	7.40762e-05	57	58	7.25819e-05	6	7	3.76708e-06	545	546	0.000272176	16	17	2.35255e-05	36	37	1.04815e-05	94	95	2.05285e-05	NA	NA	NA	NA	NA
AVHYVSGL	GCGGTGCACTACGTGTCGGGACTA	WT	321	322	8.65375e-05	134	135	9.97995e-05	701	702	0.000112248	NA	NA	NA	NA	NA	NA	NA	NA	NA	233	234	4.97415e-05	97	98	4.53717e-05	32	33	4.12966e-05	18	19	1.02249e-05	8	9	4.48642e-06	2	3	4.15157e-06	2210	2211	0.000626343	157	158	3.41421e-05	NA	NA	NA	NA	NA
AVICFFSV	GCCGTAATCTGCTTCTTTTCAGTT	WT	1744	1745	0.000468969	617	618	0.00045686	2715	2716	0.000434281	NA	NA	NA	NA	NA	NA	NA	NA	NA	1130	1131	0.000240417	487	488	0.000225932	157	158	0.000197723	655	656	0.000353029	890	891	0.000444156	5	6	8.30313e-06	370	371	0.000105099	782	783	0.000169198	NA	NA	NA	NA	NA
AVIGFGVL	GCCGTGATCGGGTTTGGGGTCCTT	WT	1026	1027	0.000276006	307	308	0.000227691	1632	1633	0.000261112	NA	NA	NA	NA	NA	NA	NA	NA	NA	590	591	0.000125629	249	250	0.000115744	98	99	0.00012389	123	124	6.67311e-05	675	676	0.00033698	12	13	1.79901e-05	389	390	0.000110481	941	942	0.000203556	NA	NA	NA	NA	NA
AVILLPRL	GCCGTAATCCTTTTGCCAAGACTG	WT	1411	1412	0.000379475	536	537	0.00039698	2699	2700	0.000431722	NA	NA	NA	NA	NA	NA	NA	NA	NA	960	961	0.00020428	420	421	0.000194913	162	163	0.00020398	200	201	0.000108169	153	154	7.67677e-05	3	4	5.53542e-06	1027	1028	0.000291217	966	967	0.000208959	NA	NA	NA	NA	NA
AVLLYEYV	GCGGTATTATTATATGAATACGTT	WT	1160	1161	0.000312019	461	462	0.000341536	2011	2012	0.000321713	NA	NA	NA	NA	NA	NA	NA	NA	NA	738	739	0.00015709	296	297	0.000137504	142	143	0.000178952	554	555	0.000298676	51	52	2.59216e-05	221	222	0.000307216	106	107	3.03115e-05	202	203	4.38662e-05	NA	NA	NA	NA	NA
AVLRYTKL	GCCGTCTTACGTTATACGAAATTA	WT	727	728	0.00019565	224	225	0.000166333	1132	1133	0.000181163	NA	NA	NA	NA	NA	NA	NA	NA	NA	456	457	9.71447e-05	151	152	7.03724e-05	67	68	8.50961e-05	97	98	5.27391e-05	255	256	0.000127614	NA	1	1.38386e-06	1039	1040	0.000294616	114	115	2.48503e-05	NA	NA	NA	NA	NA
AVLTCVPL	GCTGTCCTTACGTGTGTTCCTCTG	WT	357	358	9.62125e-05	137	138	0.000102017	396	397	6.34791e-05	NA	NA	NA	NA	NA	NA	NA	NA	NA	152	153	3.25233e-05	70	71	3.28713e-05	32	33	4.12966e-05	38	39	2.0988e-05	4054	4055	0.00202138	5	6	8.30313e-06	2	3	8.49855e-07	165	166	3.58709e-05	NA	NA	NA	NA	NA
AVLTFRRL	GCCGTTCTAACGTTCAGACGGCTG	WT	188	189	5.07937e-05	81	82	6.0619e-05	362	363	5.80426e-05	NA	NA	NA	NA	NA	NA	NA	NA	NA	102	103	2.18948e-05	40	41	1.8982e-05	20	21	2.62797e-05	NA	1	5.38154e-07	8	9	4.48642e-06	NA	1	1.38386e-06	NA	1	2.83285e-07	9	10	2.1609e-06	NA	NA	NA	NA	NA
AVMMWASL	GCGGTAATGATGTGGGCGTCGCTT	WT	734	735	0.000197531	241	242	0.0001789	1137	1138	0.000181963	NA	NA	NA	NA	NA	NA	NA	NA	NA	415	416	8.84293e-05	198	199	9.21322e-05	87	88	0.000110124	174	175	9.4177e-05	22	23	1.14653e-05	73	74	0.000102405	17	18	5.09913e-06	7898	7899	0.00170689	NA	NA	NA	NA	NA
AVMVFALV	GCTGTGATGGTATTCGCTTTGGTG	WT	810	811	0.000217956	280	281	0.000207731	1468	1469	0.000234889	NA	NA	NA	NA	NA	NA	NA	NA	NA	451	452	9.60818e-05	201	202	9.35212e-05	75	76	9.51074e-05	597	598	0.000321816	77	78	3.88823e-05	115	116	0.000160527	127	128	3.62605e-05	562	563	0.000121658	NA	NA	NA	NA	NA
AVMWSHLL	GCAGTCATGTGGTCTCACTTACTA	WT	1071	1072	0.0002881	440	441	0.000326012	1722	1723	0.000275503	NA	NA	NA	NA	NA	NA	NA	NA	NA	651	652	0.000138596	271	272	0.000125929	94	95	0.000118884	178	179	9.63296e-05	415	416	0.000207372	1039	1040	0.00143921	1512	1513	0.00042861	906	907	0.000195993	NA	NA	NA	NA	NA
AVNFFGTV	GCTGTTAACTTCTTTGGGACAGTT	WT	876	877	0.000235694	255	256	0.000189249	1409	1410	0.000225455	NA	NA	NA	NA	NA	NA	NA	NA	NA	520	521	0.000110749	273	274	0.000126855	90	91	0.000113879	635	636	0.000342266	99	100	4.98492e-05	113	114	0.000157759	173	174	4.92916e-05	2411	2412	0.000521208	NA	NA	NA	NA	NA
AVNMFRTL	GCGGTAAATATGTTTCGTACACTA	WT	639	640	0.000172	271	272	0.000201078	1336	1337	0.000213782	NA	NA	NA	NA	NA	NA	NA	NA	NA	425	426	9.0555e-05	203	204	9.44471e-05	84	85	0.00010637	18	19	1.02249e-05	145	146	7.27798e-05	5	6	8.30313e-06	207	208	5.89233e-05	1989	1990	0.000430018	NA	NA	NA	NA	NA
AVNYFTNI	GCGGTTAACTATTTTACAAATATT	WT	1207	1208	0.00032465	430	431	0.000318619	1974	1975	0.000315797	NA	NA	NA	NA	NA	NA	NA	NA	NA	704	705	0.000149862	326	327	0.000151393	89	90	0.000112627	407	408	0.000219567	173	174	8.67375e-05	74	75	0.000103789	1461	1462	0.000414163	346	347	7.49831e-05	NA	NA	NA	NA	NA
AVPGYLSL	GCCGTACCAGGATACCTTTCGTTA	WT	786	787	0.000211506	269	270	0.000199599	1420	1421	0.000227214	NA	NA	NA	NA	NA	NA	NA	NA	NA	518	519	0.000110324	243	244	0.000112966	65	66	8.25932e-05	165	166	8.93336e-05	58	59	2.9411e-05	457	458	0.000633806	2520	2521	0.000714161	1361	1362	0.000294314	NA	NA	NA	NA	NA
AVPVFDLL	GCGGTGCCTGTATTTGACTTATTG	WT	921	922	0.000247787	313	314	0.000232126	1515	1516	0.000242404	NA	NA	NA	NA	NA	NA	NA	NA	NA	553	554	0.000117764	244	245	0.000113429	81	82	0.000102616	170	171	9.20244e-05	104	105	5.23416e-05	90	91	0.000125931	555	556	0.000157506	1781	1782	0.000385071	NA	NA	NA	NA	NA
AVQAFVFL	GCCGTCCAAGCCTTTGTCTTTCTG	WT	2261	2262	0.000607912	742	743	0.000549267	3532	3533	0.000564916	NA	NA	NA	NA	NA	NA	NA	NA	NA	1326	1327	0.000282081	672	673	0.000311583	180	181	0.000226506	318	319	0.000171671	1609	1610	0.000802571	679	680	0.000941021	2945	2946	0.000834557	19195	19196	0.00414805	NA	NA	NA	NA	NA
AVQFVSSL	GCTGTTCAGTTTGTTTCTAGCCTG	WT	866	867	0.000233006	304	305	0.000225473	1559	1560	0.000249439	NA	NA	NA	NA	NA	NA	NA	NA	NA	532	533	0.0001133	259	260	0.000120374	98	99	0.00012389	90	91	4.8972e-05	32	33	1.64502e-05	107	108	0.000149456	1249	1250	0.000354106	2160	2161	0.000466969	NA	NA	NA	NA	NA
AVQLFMFL	GCTGTTCAGCTCTTTATGTTCCTG	WT	6115	6116	0.00164367	2191	2192	0.00162045	10264	10265	0.00164134	NA	NA	NA	NA	NA	NA	NA	NA	NA	3717	3718	0.000790337	1683	1684	0.000779652	667	668	0.000835944	1751	1752	0.000942846	823	824	0.000410757	158	159	0.000220033	5113	5114	0.00144872	9768	9769	0.00211098	NA	NA	NA	NA	NA
AVRCFALF	GCAGTACGTTGTTTTGCGCTATTT	WT	2666	2667	0.000716756	1019	1020	0.000754041	5335	5336	0.000853211	NA	NA	NA	NA	NA	NA	NA	NA	NA	1718	1719	0.000365409	785	786	0.000363899	304	305	0.000381681	246	247	0.000132924	723	724	0.000360908	117	118	0.000163295	2973	2974	0.000842489	975	976	0.000210903	NA	NA	NA	NA	NA
AVRPYAGM	GCCGTGCGCCCCTATGCTGGCATG	WT	38	39	1.04812e-05	13	14	1.03496e-05	64	65	1.03933e-05	NA	NA	NA	NA	NA	NA	NA	NA	NA	31	32	6.80225e-06	7	8	3.70381e-06	4	5	6.25706e-06	NA	1	5.38154e-07	NA	1	4.98492e-07	NA	1	1.38386e-06	1	2	5.6657e-07	NA	1	2.1609e-07	NA	NA	NA	NA	NA
AVTFVCSL	GCGGTTACCTTTGTGTGTAGCTTG	WT	389	390	0.000104812	148	149	0.000110149	777	778	0.0001244	NA	NA	NA	NA	NA	NA	NA	NA	NA	277	278	5.90946e-05	122	123	5.69461e-05	43	44	5.50622e-05	186	187	0.000100635	139	140	6.97888e-05	14	15	2.07578e-05	25	26	7.36541e-06	25	26	5.61833e-06	NA	NA	NA	NA	NA
AVVRIVNL	GCAGTCGTACGAATTGTCAATTTG	WT	1523	1524	0.000409575	611	612	0.000452424	3107	3108	0.00049696	NA	NA	NA	NA	NA	NA	NA	NA	NA	1073	1074	0.000228301	442	443	0.000205098	177	178	0.000222751	322	323	0.000173824	1308	1309	0.000652525	4144	4145	0.00573608	4715	4716	0.00133597	310	311	6.72038e-05	NA	NA	NA	NA	NA
AVVTFLFL	GCAGTAGTCACGTTCCTCTTTCTT	WT	1988	1989	0.000534544	721	722	0.000533743	3177	3178	0.000508153	NA	NA	NA	NA	NA	NA	NA	NA	NA	1150	1151	0.000244669	614	615	0.00028473	199	200	0.000250283	211	212	0.000114089	874	875	0.00043618	325	326	0.000451137	1501	1502	0.000425494	1275	1276	0.00027573	NA	NA	NA	NA	NA
AVWFLSNI	GCAGTGTGGTTCCTTAGTAACATC	WT	1943	1944	0.00052245	652	653	0.000482734	3311	3312	0.000529579	NA	NA	NA	NA	NA	NA	NA	NA	NA	1151	1152	0.000244881	520	521	0.000241211	194	195	0.000244025	370	371	0.000199655	552	553	0.000275666	80	81	0.000112092	320	321	9.09345e-05	1999	2000	0.000432179	NA	NA	NA	NA	NA
AVYAALGL	GCGGTATATGCCGCACTTGGTTTG	WT	720	721	0.000193769	273	274	0.000202556	1626	1627	0.000260153	NA	NA	NA	NA	NA	NA	NA	NA	NA	468	469	9.96955e-05	198	199	9.21322e-05	89	90	0.000112627	54	55	2.95985e-05	883	884	0.000440667	529	530	0.000733443	1146	1147	0.000324928	876	877	0.00018951	NA	NA	NA	NA	NA
AVYEYFRA	GCTGTATACGAGTACTTTAGAGCG	WT	576	577	0.000155069	272	273	0.000201817	1122	1123	0.000179564	NA	NA	NA	NA	NA	NA	NA	NA	NA	388	389	8.26899e-05	158	159	7.36132e-05	56	57	7.13305e-05	81	82	4.41287e-05	9	10	4.98492e-06	14	15	2.07578e-05	58	59	1.67138e-05	201	202	4.36501e-05	NA	NA	NA	NA	NA
AVYKMADV	GCAGTGTATAAAATGGCCGATGTT	WT	728	729	0.000195919	295	296	0.00021882	1412	1413	0.000225935	NA	NA	NA	NA	NA	NA	NA	NA	NA	483	484	0.000102884	200	201	9.30582e-05	76	77	9.63588e-05	3469	3470	0.0018674	17	18	8.97285e-06	332	333	0.000460824	9	10	2.83285e-06	264	265	5.72637e-05	NA	NA	NA	NA	NA
AVYLLAHA	GCCGTATACCTCTTAGCCCACGCC	WT	24	25	6.71875e-06	22	23	1.70029e-05	93	94	1.50303e-05	NA	NA	NA	NA	NA	NA	NA	NA	NA	25	26	5.52683e-06	11	12	5.55571e-06	8	9	1.12627e-05	15	16	8.61047e-06	1	2	9.96983e-07	NA	1	1.38386e-06	NA	1	2.83285e-07	NA	1	2.1609e-07	NA	NA	NA	NA	NA
AVYMAIGF	GCAGTATACATGGCTATAGGTTTT	WT	2465	2466	0.000662737	912	913	0.00067494	4643	4644	0.000742562	NA	NA	NA	NA	NA	NA	NA	NA	NA	1536	1537	0.000326721	755	756	0.00035001	261	262	0.00032787	950	951	0.000511785	379	380	0.000189427	256	257	0.000355651	1203	1204	0.000341075	779	780	0.00016855	NA	NA	NA	NA	NA
AVYQLLGL	GCTGTGTATCAGTTGTTGGGACTG	WT	777	778	0.000209087	287	288	0.000212906	1368	1369	0.000218899	NA	NA	NA	NA	NA	NA	NA	NA	NA	436	437	9.28933e-05	181	182	8.42616e-05	71	72	9.01017e-05	49	50	2.69077e-05	8	9	4.48642e-06	118	119	0.000164679	109	110	3.11613e-05	101	102	2.20411e-05	NA	NA	NA	NA	NA
AVYRKLGV	GCCGTCTATAGAAAACTAGGGGTG	WT	286	287	7.71312e-05	89	90	6.6533e-05	412	413	6.60375e-05	NA	NA	NA	NA	NA	NA	NA	NA	NA	164	165	3.50741e-05	81	82	3.7964e-05	24	25	3.12853e-05	192	193	0.000103864	133	134	6.67979e-05	20	21	2.9061e-05	10	11	3.11613e-06	131	132	2.85238e-05	NA	NA	NA	NA	NA
AVYRMTYV	GCTGTCTATCGTATGACGTACGTT	WT	1834	1835	0.000493156	686	687	0.000507869	2956	2957	0.000472816	NA	NA	NA	NA	NA	NA	NA	NA	NA	1184	1185	0.000251896	492	493	0.000228247	186	187	0.000234014	125	126	6.78074e-05	250	251	0.000125121	328	329	0.000455288	218	219	6.20394e-05	316	317	6.85004e-05	NA	NA	NA	NA	NA
AVYRYMDT	GCCGTGTACCGGTATATGGATACG	WT	1247	1248	0.0003354	469	470	0.00034745	2223	2224	0.000355611	NA	NA	NA	NA	NA	NA	NA	NA	NA	732	733	0.000155814	302	303	0.000140282	116	117	0.000146415	353	354	0.000190507	472	473	0.000235787	2857	2858	0.00395506	1244	1245	0.00035269	89	90	1.94481e-05	NA	NA	NA	NA	NA
AVYSHFYV	GCAGTCTACTCCCACTTCTACGTA	WT	535	536	0.00014405	253	254	0.000187771	1218	1219	0.000194915	NA	NA	NA	NA	NA	NA	NA	NA	NA	469	470	9.99081e-05	169	170	7.87059e-05	82	83	0.000103867	169	170	9.14862e-05	14	15	7.47737e-06	14	15	2.07578e-05	297	298	8.44189e-05	762	763	0.000164876	NA	NA	NA	NA	NA
AWFEQFVL	GCATGGTTTGAACAATTTGTGCTC	WT	866	867	0.000233006	304	305	0.000225473	1763	1764	0.000282058	NA	NA	NA	NA	NA	NA	NA	NA	NA	540	541	0.000115001	241	242	0.00011204	79	80	0.000100113	51	52	2.7984e-05	8428	8429	0.00420179	4	5	6.91928e-06	1115	1116	0.000316146	270	271	5.85603e-05	NA	NA	NA	NA	NA
AWFFCLLL	GCGTGGTTCTTTTGCCTCTTGCTA	WT	482	483	0.000129806	212	213	0.000157461	1081	1082	0.000173009	NA	NA	NA	NA	NA	NA	NA	NA	NA	386	387	8.22647e-05	177	178	8.24097e-05	63	64	8.00904e-05	14	15	8.07232e-06	110	111	5.53326e-05	31	32	4.42834e-05	995	996	0.000282152	122	123	2.6579e-05	NA	NA	NA	NA	NA
AWYFNGAL	GCTTGGTATTTCAACGGAGCTCTC	WT	798	799	0.000214731	356	357	0.000263914	1595	1596	0.000255196	NA	NA	NA	NA	NA	NA	NA	NA	NA	576	577	0.000122653	255	256	0.000118522	103	104	0.000130147	423	424	0.000228177	1972	1973	0.000983524	137	138	0.000190972	2659	2660	0.000753538	1759	1760	0.000380318	NA	NA	NA	NA	NA
AYDIYSRL	GCTTACGACATATATTCGCGTCTT	WT	7083	7084	0.00190382	2290	2291	0.00169363	11600	11601	0.00185497	NA	NA	NA	NA	NA	NA	NA	NA	NA	4288	4289	0.000911714	2005	2006	0.00092873	690	691	0.000864726	4339	4340	0.00233559	2029	2030	0.00101194	435	436	0.000603361	5347	5348	0.00151501	3134	3135	0.000677441	NA	NA	NA	NA	NA
AYFESPNL	GCGTACTTTGAGTCTCCTAATCTC	WT	1462	1463	0.000393181	549	550	0.000406591	2578	2579	0.000412375	NA	NA	NA	NA	NA	NA	NA	NA	NA	889	890	0.000189188	428	429	0.000198617	135	136	0.000170192	641	642	0.000345495	629	630	0.00031405	61	62	8.5799e-05	311	312	8.83849e-05	770	771	0.000166605	NA	NA	NA	NA	NA
AYFRIKLM	GCTTATTTTCGCATTAAACTCATG	WT	3	4	1.075e-06	NA	1	7.39256e-07	13	14	2.23856e-06	NA	NA	NA	NA	NA	NA	NA	NA	NA	7	8	1.70056e-06	1	2	9.25952e-07	NA	1	1.25141e-06	NA	1	5.38154e-07	NA	1	4.98492e-07	NA	1	1.38386e-06	NA	1	2.83285e-07	NA	1	2.1609e-07	NA	NA	NA	NA	NA
AYGRHAGL	GCGTACGGCCGTCATGCGGGTCTG	WT	1594	1595	0.000428656	616	617	0.000456121	3049	3050	0.000487686	NA	NA	NA	NA	NA	NA	NA	NA	NA	1003	1004	0.000213421	410	411	0.000190283	166	167	0.000208986	249	250	0.000134539	21	22	1.09668e-05	76	77	0.000106557	186	187	5.29743e-05	1661	1662	0.000359141	NA	NA	NA	NA	NA
AYINMVPL	GCTTACATTAATATGGTGCCACTG	WT	513	514	0.000138137	214	215	0.00015894	1158	1159	0.000185321	NA	NA	NA	NA	NA	NA	NA	NA	NA	362	363	7.71631e-05	187	188	8.70395e-05	70	71	8.88503e-05	18	19	1.02249e-05	380	381	0.000189925	209	210	0.00029061	490	491	0.000139093	587	588	0.000127061	NA	NA	NA	NA	NA
AYIYFTDF	GCATACATTTATTTCACAGATTTT	WT	1959	1960	0.00052675	685	686	0.000507129	3102	3103	0.000496161	NA	NA	NA	NA	NA	NA	NA	NA	NA	1279	1280	0.00027209	645	646	0.000299083	198	199	0.000249031	1181	1182	0.000636098	260	261	0.000130106	189	190	0.000262932	542	543	0.000153824	2039	2040	0.000440823	NA	NA	NA	NA	NA
AYKYLAAL	GCGTACAAATATCTAGCGGCTTTG	WT	1374	1375	0.000369531	558	559	0.000413244	2434	2435	0.000389349	NA	NA	NA	NA	NA	NA	NA	NA	NA	877	878	0.000186637	382	383	0.00017732	157	158	0.000197723	1645	1646	0.000885802	1041	1042	0.000519428	48	49	6.78089e-05	1222	1223	0.000346457	2163	2164	0.000467618	NA	NA	NA	NA	NA
AYLMSQPL	GCCTATCTAATGTCCCAGCCCTTG	WT	732	733	0.000196994	276	277	0.000204774	1479	1480	0.000236648	NA	NA	NA	NA	NA	NA	NA	NA	NA	562	563	0.000119677	184	185	8.56506e-05	71	72	9.01017e-05	286	287	0.00015445	50	51	2.54231e-05	17	18	2.49094e-05	204	205	5.80734e-05	33	34	7.34704e-06	NA	NA	NA	NA	NA
AYWMKTPL	GCATATTGGATGAAGACGCCGTTG	WT	380	381	0.000102394	163	164	0.000121238	838	839	0.000134154	NA	NA	NA	NA	NA	NA	NA	NA	NA	228	229	4.86786e-05	105	106	4.90755e-05	46	47	5.88164e-05	16	17	9.14862e-06	82	83	4.13748e-05	NA	1	1.38386e-06	2	3	8.49855e-07	1184	1185	0.000256066	NA	NA	NA	NA	NA
AYYFIGFL	GCCTATTATTTCATCGGCTTTCTC	WT	1012	1013	0.000272244	347	348	0.000257261	1581	1582	0.000252957	NA	NA	NA	NA	NA	NA	NA	NA	NA	582	583	0.000123929	324	325	0.000150467	90	91	0.000113879	880	881	0.000474114	24	25	1.24623e-05	14	15	2.07578e-05	169	170	4.81584e-05	1890	1891	0.000408625	NA	NA	NA	NA	NA
AYYLTYIL	GCGTACTATCTGACCTATATCCTG	WT	961	962	0.000258537	311	312	0.000230648	1472	1473	0.000235528	NA	NA	NA	NA	NA	NA	NA	NA	NA	563	564	0.00011989	262	263	0.000121763	110	111	0.000138907	153	154	8.28758e-05	83	84	4.18733e-05	196	197	0.000272619	436	437	0.000123796	2685	2686	0.000580416	NA	NA	NA	NA	NA
AYYLYIPL	GCCTATTATTTGTATATCCCGCTC	WT	2025	2026	0.000544487	644	645	0.00047682	3026	3027	0.000484009	NA	NA	NA	NA	NA	NA	NA	NA	NA	1178	1179	0.00025062	544	545	0.000252322	191	192	0.000240271	478	479	0.000257776	351	352	0.000175469	174	175	0.000242175	294	295	8.3569e-05	153	154	3.32778e-05	NA	NA	NA	NA	NA
AYYSLQCL	GCGTACTACTCACTTCAATGCTTG	WT	1152	1153	0.000309869	415	416	0.00030753	1834	1835	0.000293411	NA	NA	NA	NA	NA	NA	NA	NA	NA	701	702	0.000149224	317	318	0.000147226	127	128	0.000160181	350	351	0.000188892	281	282	0.000140575	2	3	4.15157e-06	231	232	6.57221e-05	1742	1743	0.000376644	NA	NA	NA	NA	NA
AYYVSGVL	GCTTACTACGTTTCAGGCGTATTG	WT	1110	1111	0.000298581	402	403	0.00029792	2127	2128	0.000340261	NA	NA	NA	NA	NA	NA	NA	NA	NA	799	800	0.000170056	364	365	0.000168986	133	134	0.000167689	160	161	8.66428e-05	567	568	0.000283143	117	118	0.000163295	20	21	5.94898e-06	935	936	0.00020226	NA	NA	NA	NA	NA
CAHIYSAL	TGTGCACACATTTATAGCGCCCTT	WT	299	300	8.0625e-05	116	117	8.64929e-05	472	473	7.56313e-05	NA	NA	NA	NA	NA	NA	NA	NA	NA	167	168	3.57118e-05	63	64	2.96305e-05	22	23	2.87825e-05	NA	1	5.38154e-07	47	48	2.39276e-05	1	2	2.76771e-06	19	20	5.6657e-06	815	816	0.000176329	NA	NA	NA	NA	NA
CALALAYL	TGCGCCCTTGCCCTCGCATATCTC	WT	126	127	3.41312e-05	78	79	5.84012e-05	245	246	3.93347e-05	NA	NA	NA	NA	NA	NA	NA	NA	NA	111	112	2.38079e-05	29	30	1.38893e-05	3	4	5.00565e-06	8	9	4.84339e-06	1	2	9.96983e-07	NA	1	1.38386e-06	13	14	3.96599e-06	1	2	4.32179e-07	NA	NA	NA	NA	NA
CAYSRVHL	TGTGCGTACAGTCGAGTGCACCTG	WT	231	232	6.235e-05	89	90	6.6533e-05	431	432	6.90755e-05	NA	NA	NA	NA	NA	NA	NA	NA	NA	143	144	3.06101e-05	42	43	1.9908e-05	18	19	2.37768e-05	4	5	2.69077e-06	13	14	6.97888e-06	NA	1	1.38386e-06	23	24	6.79884e-06	454	455	9.83207e-05	NA	NA	NA	NA	NA
CGAFYLPL	TGCGGCGCCTTTTATCTCCCATTG	WT	764	765	0.000205594	325	326	0.000240997	1363	1364	0.0002181	NA	NA	NA	NA	NA	NA	NA	NA	NA	485	486	0.000103309	231	232	0.00010741	75	76	9.51074e-05	61	62	3.33656e-05	865	866	0.000431694	55	56	7.74959e-05	89	90	2.54956e-05	2481	2482	0.000536334	NA	NA	NA	NA	NA
CGFPFLLL	TGTGGATTTCCGTTCCTCCTACTT	WT	459	460	0.000123625	165	166	0.000122716	738	739	0.000118164	NA	NA	NA	NA	NA	NA	NA	NA	NA	281	282	5.99449e-05	128	129	5.97239e-05	38	39	4.88051e-05	4	5	2.69077e-06	70	71	3.53929e-05	65	66	9.13344e-05	1148	1149	0.000325494	91	92	1.98802e-05	NA	NA	NA	NA	NA
CGFVIAHL	TGTGGATTTGTTATAGCTCATTTA	WT	2654	2655	0.000713531	988	989	0.000731124	4447	4448	0.000711222	NA	NA	NA	NA	NA	NA	NA	NA	NA	1655	1656	0.000352017	766	767	0.000355103	286	287	0.000359155	2088	2089	0.0011242	727	728	0.000362902	186	187	0.000258781	455	456	0.000129178	2003	2004	0.000433043	NA	NA	NA	NA	NA
CGFVKGAL	TGCGGTTTTGTGAAAGGCGCCTTG	WT	196	197	5.29437e-05	51	52	3.84413e-05	302	303	4.84488e-05	NA	NA	NA	NA	NA	NA	NA	NA	NA	122	123	2.61462e-05	51	52	2.40748e-05	20	21	2.62797e-05	25	26	1.3992e-05	NA	1	4.98492e-07	1	2	2.76771e-06	1	2	5.6657e-07	127	128	2.76595e-05	NA	NA	NA	NA	NA
CGKAFSQL	TGCGGTAAGGCATTCTCCCAACTA	WT	485	486	0.000130612	201	202	0.00014933	966	967	0.00015462	NA	NA	NA	NA	NA	NA	NA	NA	NA	321	322	6.84477e-05	139	140	6.48166e-05	56	57	7.13305e-05	86	87	4.68194e-05	907	908	0.00045263	27	28	3.87479e-05	1385	1386	0.000392633	641	642	0.000138729	NA	NA	NA	NA	NA
CGKRFAEL	TGTGGTAAACGATTCGCCGAGTTG	WT	160	161	4.32687e-05	45	46	3.40058e-05	341	342	5.46848e-05	NA	NA	NA	NA	NA	NA	NA	NA	NA	113	114	2.4233e-05	52	53	2.45377e-05	13	14	1.75198e-05	83	84	4.5205e-05	473	474	0.000236285	NA	1	1.38386e-06	172	173	4.90083e-05	271	272	5.87763e-05	NA	NA	NA	NA	NA
CGLGYRTL	TGTGGACTGGGGTATCGAACGCTG	WT	207	208	5.59e-05	58	59	4.36161e-05	355	356	5.69234e-05	NA	NA	NA	NA	NA	NA	NA	NA	NA	123	124	2.63587e-05	46	47	2.17599e-05	19	20	2.50283e-05	5	6	3.22893e-06	5	6	2.99095e-06	41	42	5.81219e-05	NA	1	2.83285e-07	1	2	4.32179e-07	NA	NA	NA	NA	NA
CGRRFGRL	TGTGGGCGACGGTTCGGGAGGTTG	WT	57	58	1.55875e-05	23	24	1.77421e-05	99	100	1.59897e-05	NA	NA	NA	NA	NA	NA	NA	NA	NA	23	24	5.10169e-06	9	10	4.62976e-06	6	7	8.75989e-06	6	7	3.76708e-06	NA	1	4.98492e-07	5	6	8.30313e-06	NA	1	2.83285e-07	NA	1	2.1609e-07	NA	NA	NA	NA	NA
CGTVFPLL	TGCGGTACAGTATTCCCTCTATTG	WT	531	532	0.000142975	222	223	0.000164854	1095	1096	0.000175247	NA	NA	NA	NA	NA	NA	NA	NA	NA	398	399	8.48156e-05	161	162	7.50021e-05	56	57	7.13305e-05	80	81	4.35905e-05	25	26	1.29608e-05	16	17	2.35255e-05	1718	1719	0.000486967	638	639	0.000138081	NA	NA	NA	NA	NA
CGWTFTSM	TGCGGCTGGACCTTCACGTCCATG	WT	357	358	9.62125e-05	112	113	8.35359e-05	589	590	9.43393e-05	NA	NA	NA	NA	NA	NA	NA	NA	NA	208	209	4.44272e-05	100	101	4.67606e-05	34	35	4.37994e-05	105	106	5.70444e-05	22	23	1.14653e-05	122	123	0.000170214	NA	1	2.83285e-07	193	194	4.19214e-05	NA	NA	NA	NA	NA
CGYQSTML	TGTGGTTACCAGAGCACGATGCTG	WT	48	49	1.31687e-05	11	12	8.87107e-06	98	99	1.58298e-05	NA	NA	NA	NA	NA	NA	NA	NA	NA	29	30	6.37711e-06	11	12	5.55571e-06	13	14	1.75198e-05	NA	1	5.38154e-07	NA	1	4.98492e-07	NA	1	1.38386e-06	NA	1	2.83285e-07	1	2	4.32179e-07	NA	NA	NA	NA	NA
CGYSRAEV	TGTGGATACAGCCGGGCTGAGGTT	WT	161	162	4.35375e-05	65	66	4.87909e-05	330	331	5.29259e-05	NA	NA	NA	NA	NA	NA	NA	NA	NA	88	89	1.89188e-05	46	47	2.17599e-05	22	23	2.87825e-05	12	13	6.99601e-06	460	461	0.000229805	1	2	2.76771e-06	7	8	2.26628e-06	6	7	1.51263e-06	NA	NA	NA	NA	NA
CGYTCSPL	TGCGGGTACACGTGTTCACCATTA	WT	361	362	9.72875e-05	125	126	9.31462e-05	636	637	0.000101854	NA	NA	NA	NA	NA	NA	NA	NA	NA	207	208	4.42146e-05	94	95	4.39827e-05	43	44	5.50622e-05	366	367	0.000197503	NA	1	4.98492e-07	1	2	2.76771e-06	69	70	1.98299e-05	97	98	2.11768e-05	NA	NA	NA	NA	NA
CGYTSVLL	TGTGGCTACACATCTGTCTTGCTT	WT	367	368	9.89e-05	143	144	0.000106453	658	659	0.000105372	NA	NA	NA	NA	NA	NA	NA	NA	NA	265	266	5.65437e-05	116	117	5.41682e-05	33	34	4.2548e-05	44	45	2.42169e-05	1304	1305	0.000650531	3	4	5.53542e-06	326	327	9.26342e-05	328	329	7.10934e-05	NA	NA	NA	NA	NA
CIAEFLSL	TGCATCGCAGAATTTCTCAGCTTA	WT	294	295	7.92812e-05	108	109	8.05789e-05	475	476	7.6111e-05	NA	NA	NA	NA	NA	NA	NA	NA	NA	179	180	3.82627e-05	73	74	3.42602e-05	30	31	3.87938e-05	19	20	1.07631e-05	1	2	9.96983e-07	18	19	2.62932e-05	3	4	1.13314e-06	136	137	2.96043e-05	NA	NA	NA	NA	NA
CIFLFSFI	TGTATATTCCTGTTCAGTTTTATC	WT	2577	2578	0.000692837	842	843	0.000623193	4002	4003	0.000640068	NA	NA	NA	NA	NA	NA	NA	NA	NA	1558	1559	0.000331397	760	761	0.000352325	231	232	0.000290328	774	775	0.00041707	102	103	5.13446e-05	191	192	0.0002657	3108	3109	0.000880733	1901	1902	0.000411002	NA	NA	NA	NA	NA
CIFLGTLL	TGCATTTTCTTAGGGACCCTGTTA	WT	2184	2185	0.000587219	769	770	0.000569227	3772	3773	0.000603292	NA	NA	NA	NA	NA	NA	NA	NA	NA	1383	1384	0.000294197	670	671	0.000310657	247	248	0.00031035	8196	8197	0.00441125	3961	3962	0.00197502	827	828	0.00114583	334	335	9.49004e-05	3744	3745	0.000809255	NA	NA	NA	NA	NA
CLFNFLLL	TGTTTGTTTAACTTCCTCTTATTG	WT	1104	1105	0.000296969	315	316	0.000233605	1448	1449	0.000231691	NA	NA	NA	NA	NA	NA	NA	NA	NA	682	683	0.000145186	308	309	0.00014306	115	116	0.000145164	760	761	0.000409535	11653	11654	0.00580942	266	267	0.000369489	503	504	0.000142776	3342	3343	0.000722387	NA	NA	NA	NA	NA
CLLAYSGL	TGCCTCTTGGCATATTCAGGACTG	WT	43	44	1.1825e-05	11	12	8.87107e-06	68	69	1.10329e-05	NA	NA	NA	NA	NA	NA	NA	NA	NA	26	27	5.7394e-06	9	10	4.62976e-06	6	7	8.75989e-06	NA	1	5.38154e-07	NA	1	4.98492e-07	NA	1	1.38386e-06	NA	1	2.83285e-07	NA	1	2.1609e-07	NA	NA	NA	NA	NA
CLRVYAGL	TGTCTTCGAGTCTACGCCGGACTC	WT	126	127	3.41312e-05	70	71	5.24872e-05	231	232	3.70961e-05	NA	NA	NA	NA	NA	NA	NA	NA	NA	98	99	2.10445e-05	35	36	1.66671e-05	17	18	2.25254e-05	6	7	3.76708e-06	339	340	0.000169487	2	3	4.15157e-06	4	5	1.41642e-06	207	208	4.49466e-05	NA	NA	NA	NA	NA
CLYIHMFL	TGCCTGTATATTCACATGTTTCTT	WT	857	858	0.000230587	294	295	0.00021808	1349	1350	0.000215861	NA	NA	NA	NA	NA	NA	NA	NA	NA	562	563	0.000119677	261	262	0.0001213	103	104	0.000130147	1024	1025	0.000551608	1722	1723	0.000858901	140	141	0.000195124	147	148	4.19262e-05	32	33	7.13095e-06	NA	NA	NA	NA	NA
CMITFQFI	TGCATGATTACCTTTCAGTTTATA	WT	1876	1877	0.000504444	653	654	0.000483473	2971	2972	0.000475214	NA	NA	NA	NA	NA	NA	NA	NA	NA	1145	1146	0.000243606	518	519	0.000240285	199	200	0.000250283	1878	1879	0.00101119	561	562	0.000280152	29	30	4.15157e-05	906	907	0.000256939	365	366	7.90888e-05	NA	NA	NA	NA	NA
CMLAFADM	TGCATGTTGGCGTTTGCTGACATG	WT	268	269	7.22937e-05	95	96	7.09685e-05	529	530	8.47455e-05	NA	NA	NA	NA	NA	NA	NA	NA	NA	212	213	4.52775e-05	79	80	3.70381e-05	31	32	4.00452e-05	19	20	1.07631e-05	NA	1	4.98492e-07	5	6	8.30313e-06	7	8	2.26628e-06	80	81	1.75032e-05	NA	NA	NA	NA	NA
CMLLASHL	TGCATGCTACTAGCTTCCCATTTG	WT	1873	1874	0.000503637	654	655	0.000484212	3050	3051	0.000487846	NA	NA	NA	NA	NA	NA	NA	NA	NA	1101	1102	0.000234253	488	489	0.000226395	156	157	0.000196472	244	245	0.000131848	285	286	0.000142569	744	745	0.00103097	297	298	8.44189e-05	651	652	0.00014089	NA	NA	NA	NA	NA
CMWLSSPL	TGCATGTGGCTATCATCCCCACTG	WT	169	170	4.56875e-05	72	73	5.39657e-05	360	361	5.77229e-05	NA	NA	NA	NA	NA	NA	NA	NA	NA	149	150	3.18856e-05	58	59	2.73156e-05	22	23	2.87825e-05	NA	1	5.38154e-07	7	8	3.98793e-06	1	2	2.76771e-06	18	19	5.38241e-06	3	4	8.64358e-07	NA	NA	NA	NA	NA
CNFLFVNL	TGTAATTTTCTTTTCGTTAACCTC	WT	742	743	0.000199681	230	231	0.000170768	1074	1075	0.000171889	NA	NA	NA	NA	NA	NA	NA	NA	NA	417	418	8.88544e-05	188	189	8.75025e-05	82	83	0.000103867	190	191	0.000102787	30	31	1.54532e-05	24	25	3.45964e-05	79	80	2.26628e-05	1166	1167	0.000252176	NA	NA	NA	NA	NA
CNKSFVFL	TGCAACAAATCGTTTGTCTTCTTA	WT	1742	1743	0.000468431	666	667	0.000493084	3141	3142	0.000502397	NA	NA	NA	NA	NA	NA	NA	NA	NA	1126	1127	0.000239567	500	501	0.000231951	169	170	0.00021274	2127	2128	0.00114519	354	355	0.000176965	205	206	0.000285074	1202	1203	0.000340792	3009	3010	0.000650429	NA	NA	NA	NA	NA
CNMVFSSL	TGTAATATGGTATTCTCGTCCCTC	WT	630	631	0.000169581	260	261	0.000192946	1118	1119	0.000178925	NA	NA	NA	NA	NA	NA	NA	NA	NA	375	376	7.99265e-05	189	190	8.79654e-05	55	56	7.00791e-05	381	382	0.000205575	26	27	1.34593e-05	60	61	8.44152e-05	78	79	2.23795e-05	1285	1286	0.000277891	NA	NA	NA	NA	NA
CNPLFAAL	TGTAATCCGCTATTTGCCGCCTTG	WT	524	525	0.000141094	205	206	0.000152287	787	788	0.000125999	NA	NA	NA	NA	NA	NA	NA	NA	NA	252	253	5.37803e-05	130	131	6.06499e-05	44	45	5.63136e-05	36	37	1.99117e-05	61	62	3.09065e-05	390	391	0.000541087	69	70	1.98299e-05	546	547	0.000118201	NA	NA	NA	NA	NA
CNYIFTVI	TGCAATTACATCTTCACTGTTATA	WT	561	562	0.000151037	200	201	0.00014859	859	860	0.000137512	NA	NA	NA	NA	NA	NA	NA	NA	NA	375	376	7.99265e-05	193	194	8.98174e-05	58	59	7.38333e-05	114	115	6.18877e-05	97	98	4.88522e-05	2	3	4.15157e-06	55	56	1.5864e-05	1002	1003	0.000216738	NA	NA	NA	NA	NA
CQFYVDNL	TGCCAATTTTACGTTGACAACCTG	WT	350	351	9.43312e-05	145	146	0.000107931	687	688	0.000110009	NA	NA	NA	NA	NA	NA	NA	NA	NA	215	216	4.59152e-05	97	98	4.53717e-05	35	36	4.50509e-05	1	2	1.07631e-06	64	65	3.2402e-05	1	2	2.76771e-06	4	5	1.41642e-06	112	113	2.44181e-05	NA	NA	NA	NA	NA
CQSIYAYL	TGTCAGTCGATTTACGCGTATCTT	WT	480	481	0.000129269	144	145	0.000107192	625	626	0.000100096	NA	NA	NA	NA	NA	NA	NA	NA	NA	238	239	5.08043e-05	113	114	5.27793e-05	37	38	4.75537e-05	12	13	6.99601e-06	48	49	2.44261e-05	10	11	1.52224e-05	42	43	1.21813e-05	3434	3435	0.000742267	NA	NA	NA	NA	NA
CRYYYPNV	TGTAGGTACTACTATCCGAATGTC	WT	482	483	0.000129806	175	176	0.000130109	720	721	0.000115286	NA	NA	NA	NA	NA	NA	NA	NA	NA	228	229	4.86786e-05	85	86	3.98159e-05	46	47	5.88164e-05	7	8	4.30523e-06	825	826	0.000411754	2	3	4.15157e-06	10	11	3.11613e-06	4874	4875	0.00105344	NA	NA	NA	NA	NA
CSFFIQAV	TGTTCCTTCTTCATTCAAGCTGTC	WT	629	630	0.000169312	218	219	0.000161897	1076	1077	0.000172209	NA	NA	NA	NA	NA	NA	NA	NA	NA	442	443	9.41687e-05	175	176	8.14838e-05	91	92	0.00011513	95	96	5.16628e-05	103	104	5.18431e-05	1620	1621	0.00224323	51	52	1.47308e-05	16318	16319	0.00352636	NA	NA	NA	NA	NA
CSFQIYSV	TGTAGTTTCCAAATTTACTCGGTA	WT	2327	2328	0.00062565	906	907	0.000670505	3703	3704	0.000592259	NA	NA	NA	NA	NA	NA	NA	NA	NA	1353	1354	0.00028782	673	674	0.000312046	238	239	0.000299088	706	707	0.000380475	178	179	8.923e-05	1662	1663	0.00230135	365	366	0.000103682	2877	2878	0.000621906	NA	NA	NA	NA	NA
CSHAFHLL	TGTTCGCATGCCTTTCATCTGTTG	WT	850	851	0.000228706	278	279	0.000206252	1424	1425	0.000227853	NA	NA	NA	NA	NA	NA	NA	NA	NA	540	541	0.000115001	219	220	0.000101855	98	99	0.00012389	191	192	0.000103326	704	705	0.000351437	54	55	7.6112e-05	147	148	4.19262e-05	581	582	0.000125764	NA	NA	NA	NA	NA
CSILFPLI	TGCAGTATATTATTCCCTTTAATC	WT	754	755	0.000202906	268	269	0.00019886	1206	1207	0.000192996	NA	NA	NA	NA	NA	NA	NA	NA	NA	446	447	9.5019e-05	220	221	0.000102318	77	78	9.76102e-05	87	88	4.73576e-05	66	67	3.33989e-05	444	445	0.000615816	1130	1131	0.000320395	3373	3374	0.000729086	NA	NA	NA	NA	NA
CSITFTSL	TGCTCGATAACATTCACATCCCTT	WT	455	456	0.00012255	205	206	0.000152287	788	789	0.000126159	NA	NA	NA	NA	NA	NA	NA	NA	NA	293	294	6.24957e-05	141	142	6.57426e-05	57	58	7.25819e-05	146	147	7.91087e-05	3081	3082	0.00153635	2	3	4.15157e-06	32	33	9.3484e-06	1125	1126	0.000243317	NA	NA	NA	NA	NA
CSLAVTNL	TGTTCACTGGCAGTAACTAACCTT	WT	255	256	6.88e-05	94	95	7.02293e-05	406	407	6.50781e-05	NA	NA	NA	NA	NA	NA	NA	NA	NA	166	167	3.54993e-05	75	76	3.51862e-05	36	37	4.63023e-05	16	17	9.14862e-06	58	59	2.9411e-05	2	3	4.15157e-06	279	280	7.93198e-05	62	63	1.36136e-05	NA	NA	NA	NA	NA
CSLFASAL	TGCTCTTTATTCGCGTCGGCCTTG	WT	161	162	4.35375e-05	75	76	5.61834e-05	315	316	5.05275e-05	NA	NA	NA	NA	NA	NA	NA	NA	NA	79	80	1.70056e-05	44	45	2.08339e-05	19	20	2.50283e-05	24	25	1.34539e-05	NA	1	4.98492e-07	1	2	2.76771e-06	495	496	0.000140509	77	78	1.6855e-05	NA	NA	NA	NA	NA
CSLFMRNI	TGCTCGCTGTTTATGCGCAACATA	WT	1627	1628	0.000437525	626	627	0.000463513	2936	2937	0.000469618	NA	NA	NA	NA	NA	NA	NA	NA	NA	946	947	0.000201304	475	476	0.000220377	155	156	0.00019522	139	140	7.53416e-05	109	110	5.48341e-05	82	83	0.00011486	214	215	6.09063e-05	2495	2496	0.000539359	NA	NA	NA	NA	NA
CSLLFAVL	TGCTCTTTATTGTTTGCGGTCTTG	WT	1372	1373	0.000368994	471	472	0.000348929	2174	2175	0.000347776	NA	NA	NA	NA	NA	NA	NA	NA	NA	787	788	0.000167505	406	407	0.000188431	125	126	0.000157678	514	515	0.000277149	839	840	0.000418733	501	502	0.000694695	1565	1566	0.000443624	1488	1489	0.000321757	NA	NA	NA	NA	NA
CSMTFEQL	TGCTCCATGACCTTTGAGCAGTTA	WT	735	736	0.0001978	318	319	0.000235823	1274	1275	0.000203869	NA	NA	NA	NA	NA	NA	NA	NA	NA	489	490	0.000104159	170	171	7.91689e-05	70	71	8.88503e-05	15	16	8.61047e-06	564	565	0.000281648	3	4	5.53542e-06	331	332	9.40506e-05	1795	1796	0.000388097	NA	NA	NA	NA	NA
CSNFFGSF	TGCTCCAATTTCTTTGGCTCATTT	WT	1055	1056	0.0002838	313	314	0.000232126	1563	1564	0.000250079	NA	NA	NA	NA	NA	NA	NA	NA	NA	538	539	0.000114575	322	323	0.000149541	97	98	0.000122638	311	312	0.000167904	320	321	0.000160016	4	5	6.91928e-06	2571	2572	0.000728609	1122	1123	0.000242669	NA	NA	NA	NA	NA
CSPMYYFL	TGTTCCCCAATGTATTACTTCCTT	WT	795	796	0.000213925	276	277	0.000204774	1117	1118	0.000178765	NA	NA	NA	NA	NA	NA	NA	NA	NA	441	442	9.39561e-05	197	198	9.16693e-05	94	95	0.000118884	74	75	4.03616e-05	193	194	9.67074e-05	14	15	2.07578e-05	18	19	5.38241e-06	477	478	0.000103291	NA	NA	NA	NA	NA
CSPRWSAL	TGTTCCCCGAGATGGTCCGCATTA	WT	307	308	8.2775e-05	107	108	7.98396e-05	494	495	7.91491e-05	NA	NA	NA	NA	NA	NA	NA	NA	NA	213	214	4.54901e-05	99	100	4.62976e-05	27	28	3.50396e-05	96	97	5.2201e-05	1	2	9.96983e-07	3	4	5.53542e-06	43	44	1.24645e-05	200	201	4.3434e-05	NA	NA	NA	NA	NA
CSRSFHNL	TGTTCTCGTTCGTTCCATAACCTA	WT	346	347	9.32562e-05	127	128	9.46247e-05	581	582	9.30601e-05	NA	NA	NA	NA	NA	NA	NA	NA	NA	247	248	5.27175e-05	102	103	4.76865e-05	46	47	5.88164e-05	245	246	0.000132386	513	514	0.000256225	NA	1	1.38386e-06	83	84	2.37959e-05	2480	2481	0.000536118	NA	NA	NA	NA	NA
CSTFRLSL	TGTTCCACGTTCAGGTTGTCACTC	WT	189	190	5.10625e-05	54	55	4.06591e-05	397	398	6.3639e-05	NA	NA	NA	NA	NA	NA	NA	NA	NA	84	85	1.80685e-05	35	36	1.66671e-05	18	19	2.37768e-05	39	40	2.15262e-05	1	2	9.96983e-07	NA	1	1.38386e-06	116	117	3.31443e-05	4	5	1.08045e-06	NA	NA	NA	NA	NA
CSWTLATV	TGTAGTTGGACGCTCGCAACTGTC	WT	198	199	5.34812e-05	81	82	6.0619e-05	296	297	4.74894e-05	NA	NA	NA	NA	NA	NA	NA	NA	NA	90	91	1.93439e-05	67	68	3.14824e-05	27	28	3.50396e-05	40	41	2.20643e-05	8	9	4.48642e-06	NA	1	1.38386e-06	7	8	2.26628e-06	245	246	5.3158e-05	NA	NA	NA	NA	NA
CSYFLGLL	TGCAGTTATTTTCTTGGCCTATTA	WT	1434	1435	0.000385656	515	516	0.000381456	2406	2407	0.000384872	NA	NA	NA	NA	NA	NA	NA	NA	NA	941	942	0.000200241	420	421	0.000194913	167	168	0.000210237	398	399	0.000214724	2377	2378	0.00118541	672	673	0.000931334	485	486	0.000137676	637	638	0.000137865	NA	NA	NA	NA	NA
CSYKLVTV	TGTTCCTATAAACTCGTCACGGTA	WT	5	6	1.6125e-06	3	4	2.95702e-06	7	8	1.27918e-06	NA	NA	NA	NA	NA	NA	NA	NA	NA	13	14	2.97599e-06	3	4	1.8519e-06	4	5	6.25706e-06	85	86	4.62813e-05	NA	1	4.98492e-07	NA	1	1.38386e-06	NA	1	2.83285e-07	NA	1	2.1609e-07	NA	NA	NA	NA	NA
CSYKNGVL	TGTTCATACAAGAACGGCGTTCTG	WT	161	162	4.35375e-05	66	67	4.95301e-05	168	169	2.70226e-05	NA	NA	NA	NA	NA	NA	NA	NA	NA	85	86	1.82811e-05	38	39	1.80561e-05	13	14	1.75198e-05	NA	1	5.38154e-07	NA	1	4.98492e-07	13	14	1.9374e-05	1	2	5.6657e-07	215	216	4.66753e-05	NA	NA	NA	NA	NA
CSYLGKEL	TGTTCCTACCTGGGCAAAGAGCTC	WT	129	130	3.49375e-05	49	50	3.69628e-05	277	278	4.44514e-05	NA	NA	NA	NA	NA	NA	NA	NA	NA	88	89	1.89188e-05	31	32	1.48152e-05	14	15	1.87712e-05	21	22	1.18394e-05	29	30	1.49547e-05	11	12	1.66063e-05	2	3	8.49855e-07	4	5	1.08045e-06	NA	NA	NA	NA	NA
CSYRLLSV	TGCAGTTATAGGCTTCTGTCCGTC	WT	1539	1540	0.000413875	576	577	0.000426551	2565	2566	0.000410296	NA	NA	NA	NA	NA	NA	NA	NA	NA	1060	1061	0.000225537	427	428	0.000198154	178	179	0.000224003	4019	4020	0.00216338	71	72	3.58914e-05	10	11	1.52224e-05	316	317	8.98013e-05	3616	3617	0.000781596	NA	NA	NA	NA	NA
CSYVRMVF	TGCTCTTATGTCCGTATGGTATTC	WT	648	649	0.000174419	236	237	0.000175204	1103	1104	0.000176526	NA	NA	NA	NA	NA	NA	NA	NA	NA	432	433	9.2043e-05	185	186	8.61135e-05	94	95	0.000118884	1501	1502	0.000808308	350	351	0.000174971	3	4	5.53542e-06	124	125	3.54106e-05	775	776	0.000167685	NA	NA	NA	NA	NA
CTAIFYTL	TGTACCGCGATCTTCTATACGCTC	WT	802	803	0.000215806	293	294	0.000217341	1484	1485	0.000237447	NA	NA	NA	NA	NA	NA	NA	NA	NA	505	506	0.000107561	255	256	0.000118522	96	97	0.000121387	695	696	0.000374555	185	186	9.27194e-05	53	54	7.47282e-05	220	221	6.2606e-05	7565	7566	0.00163493	NA	NA	NA	NA	NA
CTFMLTQM	TGTACATTTATGCTCACTCAAATG	WT	319	320	8.6e-05	126	127	9.38855e-05	497	498	7.96288e-05	NA	NA	NA	NA	NA	NA	NA	NA	NA	206	207	4.40021e-05	86	87	4.02789e-05	37	38	4.75537e-05	229	230	0.000123775	616	617	0.000307569	26	27	3.73641e-05	149	150	4.24927e-05	1	2	4.32179e-07	NA	NA	NA	NA	NA
CTFVLSYL	TGTACGTTTGTTCTTTCCTATTTA	WT	1782	1783	0.000479181	573	574	0.000424333	2833	2834	0.000453148	NA	NA	NA	NA	NA	NA	NA	NA	NA	1025	1026	0.000218097	515	516	0.000238896	209	210	0.000262797	314	315	0.000169519	580	581	0.000289624	31	32	4.42834e-05	11250	11251	0.00318724	1563	1564	0.000337964	NA	NA	NA	NA	NA
CTLKYSIL	TGTACCCTAAAATACAGTATCTTA	WT	641	642	0.000172537	208	209	0.000154504	1022	1023	0.000163575	NA	NA	NA	NA	NA	NA	NA	NA	NA	369	370	7.8651e-05	165	166	7.6854e-05	54	55	6.88277e-05	236	237	0.000127543	114	115	5.73265e-05	1166	1167	0.00161496	536	537	0.000152124	1231	1232	0.000266222	NA	NA	NA	NA	NA
CTMYIISL	TGTACCATGTATATAATCTCCCTC	WT	455	456	0.00012255	159	160	0.000118281	629	630	0.000100735	NA	NA	NA	NA	NA	NA	NA	NA	NA	261	262	5.56934e-05	126	127	5.8798e-05	62	63	7.8839e-05	4	5	2.69077e-06	3	4	1.99397e-06	14	15	2.07578e-05	9	10	2.83285e-06	798	799	0.000172656	NA	NA	NA	NA	NA
CTRIFAGI	TGTACGCGGATATTCGCTGGGATC	WT	214	215	5.77812e-05	70	71	5.24872e-05	450	451	7.21136e-05	NA	NA	NA	NA	NA	NA	NA	NA	NA	129	130	2.76342e-05	69	70	3.24083e-05	28	29	3.6291e-05	15	16	8.61047e-06	138	139	6.92903e-05	48	49	6.78089e-05	2	3	8.49855e-07	11	12	2.59307e-06	NA	NA	NA	NA	NA
CTWFQADL	TGCACTTGGTTCCAAGCCGATCTC	WT	377	378	0.000101587	152	153	0.000113106	610	611	9.76971e-05	NA	NA	NA	NA	NA	NA	NA	NA	NA	225	226	4.80409e-05	114	115	5.32422e-05	41	42	5.25593e-05	42	43	2.31406e-05	25	26	1.29608e-05	21	22	3.04448e-05	10	11	3.11613e-06	91	92	1.98802e-05	NA	NA	NA	NA	NA
CTYCRRHF	TGTACTTATTGCAGGAGACACTTC	WT	1142	1143	0.000307181	438	439	0.000324533	1883	1884	0.000301246	NA	NA	NA	NA	NA	NA	NA	NA	NA	701	702	0.000149224	295	296	0.000137041	112	113	0.00014141	1339	1340	0.000721127	81	82	4.08763e-05	173	174	0.000240791	389	390	0.000110481	1740	1741	0.000376212	NA	NA	NA	NA	NA
CTYDYLFV	TGTACATATGATTATTTGTTTGTA	WT	653	654	0.000175762	223	224	0.000165593	1053	1054	0.000168532	NA	NA	NA	NA	NA	NA	NA	NA	NA	380	381	8.09893e-05	154	155	7.17613e-05	57	58	7.25819e-05	102	103	5.54299e-05	404	405	0.000201889	8	9	1.24547e-05	121	122	3.45608e-05	540	541	0.000116904	NA	NA	NA	NA	NA
CTYKVTGL	TGTACTTATAAAGTCACAGGTCTC	WT	1200	1201	0.000322769	441	442	0.000326751	1959	1960	0.000313398	NA	NA	NA	NA	NA	NA	NA	NA	NA	768	769	0.000163467	337	338	0.000156486	131	132	0.000165186	1170	1171	0.000630179	23	24	1.19638e-05	279	280	0.000387479	538	539	0.000152691	806	807	0.000174384	NA	NA	NA	NA	NA
CVFFYGLV	TGTGTATTCTTCTATGGGCTGGTG	WT	257	258	6.93375e-05	126	127	9.38855e-05	553	554	8.8583e-05	NA	NA	NA	NA	NA	NA	NA	NA	NA	207	208	4.42146e-05	99	100	4.62976e-05	34	35	4.37994e-05	5	6	3.22893e-06	4	5	2.49246e-06	5	6	8.30313e-06	19	20	5.6657e-06	4113	4114	0.000888992	NA	NA	NA	NA	NA
CVLAFTGV	TGCGTGCTAGCATTTACGGGCGTG	WT	199	200	5.375e-05	64	65	4.80516e-05	320	321	5.1327e-05	NA	NA	NA	NA	NA	NA	NA	NA	NA	102	103	2.18948e-05	33	34	1.57412e-05	30	31	3.87938e-05	129	130	6.99601e-05	327	328	0.000163505	3	4	5.53542e-06	100	101	2.86118e-05	203	204	4.40823e-05	NA	NA	NA	NA	NA
CVLTFLGL	TGTGTTTTGACATTCTTAGGTCTT	WT	882	883	0.000237306	284	285	0.000210688	1456	1457	0.00023297	NA	NA	NA	NA	NA	NA	NA	NA	NA	532	533	0.0001133	243	244	0.000112966	91	92	0.00011513	31	32	1.72209e-05	197	198	9.87013e-05	9	10	1.38386e-05	3085	3086	0.000874217	4426	4427	0.000956628	NA	NA	NA	NA	NA
CVPPYISM	TGCGTCCCACCGTATATAAGCATG	WT	164	165	4.43437e-05	50	51	3.7702e-05	414	415	6.63573e-05	NA	NA	NA	NA	NA	NA	NA	NA	NA	112	113	2.40205e-05	38	39	1.80561e-05	20	21	2.62797e-05	NA	1	5.38154e-07	7	8	3.98793e-06	209	210	0.00029061	1	2	5.6657e-07	608	609	0.000131599	NA	NA	NA	NA	NA
CVTPFLTL	TGCGTAACTCCCTTTCTTACACTA	WT	1950	1951	0.000524331	700	701	0.000518218	3380	3381	0.000540612	NA	NA	NA	NA	NA	NA	NA	NA	NA	1114	1115	0.000237016	580	581	0.000268989	211	212	0.000265299	187	188	0.000101173	870	871	0.000434186	639	640	0.000885667	401	402	0.000113881	483	484	0.000104587	NA	NA	NA	NA	NA
CVYAYLIL	TGTGTGTACGCATATCTCATCCTC	WT	395	396	0.000106425	120	121	8.94499e-05	769	770	0.000123121	NA	NA	NA	NA	NA	NA	NA	NA	NA	243	244	5.18672e-05	104	105	4.86125e-05	48	49	6.13192e-05	31	32	1.72209e-05	1	2	9.96983e-07	51	52	7.19605e-05	28	29	8.21526e-06	261	262	5.66155e-05	NA	NA	NA	NA	NA
CVYCLAEV	TGTGTTTACTGCCTTGCAGAAGTT	WT	447	448	0.0001204	157	158	0.000116802	972	973	0.00015558	NA	NA	NA	NA	NA	NA	NA	NA	NA	326	327	6.95105e-05	136	137	6.34277e-05	59	60	7.50848e-05	57	58	3.1213e-05	61	62	3.09065e-05	121	122	0.00016883	9	10	2.83285e-06	1496	1497	0.000323486	NA	NA	NA	NA	NA
CVYDLCLL	TGCGTCTATGACCTCTGCCTCTTG	WT	133	134	3.60125e-05	43	44	3.25272e-05	209	210	3.35784e-05	NA	NA	NA	NA	NA	NA	NA	NA	NA	80	81	1.72182e-05	44	45	2.08339e-05	15	16	2.00226e-05	NA	1	5.38154e-07	NA	1	4.98492e-07	1	2	2.76771e-06	25	26	7.36541e-06	NA	1	2.1609e-07	NA	NA	NA	NA	NA
CVYFFKNL	TGTGTATATTTCTTTAAGAATTTA	WT	733	734	0.000197262	289	290	0.000214384	1259	1260	0.00020147	NA	NA	NA	NA	NA	NA	NA	NA	NA	519	520	0.000110537	229	230	0.000106484	58	59	7.38333e-05	71	72	3.87471e-05	206	207	0.000103188	30	31	4.28995e-05	24	25	7.08212e-06	121	122	2.63629e-05	NA	NA	NA	NA	NA
CVYSLLYL	TGCGTGTACTCCCTACTGTATTTA	WT	458	459	0.000123356	176	177	0.000130848	815	816	0.000130476	NA	NA	NA	NA	NA	NA	NA	NA	NA	251	252	5.35677e-05	142	143	6.62056e-05	33	34	4.2548e-05	12	13	6.99601e-06	36	37	1.84442e-05	4	5	6.91928e-06	128	129	3.65438e-05	55	56	1.2101e-05	NA	NA	NA	NA	NA
CWLAWSPL	TGTTGGTTAGCTTGGTCACCCCTA	WT	465	466	0.000125237	149	150	0.000110888	861	862	0.000137831	NA	NA	NA	NA	NA	NA	NA	NA	NA	295	296	6.29208e-05	128	129	5.97239e-05	63	64	8.00904e-05	61	62	3.33656e-05	43	44	2.19336e-05	2	3	4.15157e-06	1976	1977	0.000560054	233	234	5.05649e-05	NA	NA	NA	NA	NA
CYDAFAPL	TGTTATGACGCCTTTGCCCCTTTA	WT	1649	1650	0.000443437	555	556	0.000411026	2762	2763	0.000441796	NA	NA	NA	NA	NA	NA	NA	NA	NA	1169	1170	0.000248707	474	475	0.000219914	168	169	0.000211489	636	637	0.000342804	851	852	0.000424715	194	195	0.000269852	793	794	0.000224928	3114	3115	0.000673119	NA	NA	NA	NA	NA
CYGYFRKL	TGTTATGGTTATTTCAGAAAGTTG	WT	571	572	0.000153725	202	203	0.000150069	921	922	0.000147425	NA	NA	NA	NA	NA	NA	NA	NA	NA	395	396	8.41779e-05	187	188	8.70395e-05	69	70	8.75989e-05	223	224	0.000120547	27	28	1.39578e-05	14	15	2.07578e-05	872	873	0.000247308	1755	1756	0.000379453	NA	NA	NA	NA	NA
CYYLAHPL	TGTTATTATCTCGCGCACCCTCTT	WT	1074	1075	0.000288906	367	368	0.000272046	1794	1795	0.000287015	NA	NA	NA	NA	NA	NA	NA	NA	NA	658	659	0.000140084	280	281	0.000130096	120	121	0.000151421	101	102	5.48917e-05	3044	3045	0.00151791	289	290	0.000401318	2009	2010	0.000569403	409	410	8.85967e-05	NA	NA	NA	NA	NA
DFYMFSEL	GACTTTTACATGTTCTCCGAGTTG	WT	927	928	0.0002494	352	353	0.000260957	1699	1700	0.000271825	NA	NA	NA	NA	NA	NA	NA	NA	NA	676	677	0.00014391	285	286	0.000132411	89	90	0.000112627	148	149	8.0185e-05	114	115	5.73265e-05	11	12	1.66063e-05	676	677	0.000191784	5485	5486	0.00118547	NA	NA	NA	NA	NA
DIFNYQSL	GACATATTTAACTATCAGTCACTG	WT	637	638	0.000171462	256	257	0.000189989	1064	1065	0.00017029	NA	NA	NA	NA	NA	NA	NA	NA	NA	398	399	8.48156e-05	187	188	8.70395e-05	77	78	9.76102e-05	11	12	6.45785e-06	16	17	8.47436e-06	2	3	4.15157e-06	5	6	1.69971e-06	15	16	3.45743e-06	NA	NA	NA	NA	NA
DIYFTSPL	GATATTTATTTTACTTCTCCTCTC	WT	3780	3781	0.00101614	1224	1225	0.000905588	5043	5044	0.000806521	NA	NA	NA	NA	NA	NA	NA	NA	NA	2126	2127	0.000452137	1192	1193	0.00055233	382	383	0.000479291	471	472	0.000254009	297	298	0.00014855	338	339	0.000469127	2178	2179	0.000617278	4019	4020	0.00086868	NA	NA	NA	NA	NA
DIYSFSEL	GATATCTACTCTTTCAGTGAGTTA	WT	4177	4178	0.00112284	1500	1501	0.00110962	6526	6527	0.00104365	NA	NA	NA	NA	NA	NA	NA	NA	NA	2552	2553	0.000542692	1130	1131	0.000523626	456	457	0.000571896	1352	1353	0.000728123	2875	2876	0.00143366	200	201	0.000278155	1440	1441	0.000408214	2002	2003	0.000432827	NA	NA	NA	NA	NA
DNYCYFIL	GATAATTACTGCTACTTCATCCTC	WT	978	979	0.000263106	329	330	0.000243954	1531	1532	0.000244962	NA	NA	NA	NA	NA	NA	NA	NA	NA	553	554	0.000117764	191	192	8.88914e-05	82	83	0.000103867	3675	3676	0.00197826	210	211	0.000105182	7	8	1.10708e-05	570	571	0.000161756	188	189	4.08409e-05	NA	NA	NA	NA	NA
DNYMYLII	GATAATTACATGTATCTTATAATC	WT	1484	1485	0.000399094	548	549	0.000405851	2434	2435	0.000389349	NA	NA	NA	NA	NA	NA	NA	NA	NA	922	923	0.000196202	431	432	0.000200006	162	163	0.00020398	423	424	0.000228177	138	139	6.92903e-05	30	31	4.28995e-05	1150	1151	0.000326061	1468	1469	0.000317435	NA	NA	NA	NA	NA
DSFFFSLV	GATTCCTTCTTCTTCAGCCTGGTG	WT	259	260	6.9875e-05	103	104	7.68826e-05	329	330	5.2766e-05	NA	NA	NA	NA	NA	NA	NA	NA	NA	155	156	3.3161e-05	61	62	2.87045e-05	23	24	3.00339e-05	1	2	1.07631e-06	3	4	1.99397e-06	209	210	0.00029061	109	110	3.11613e-05	339	340	7.34704e-05	NA	NA	NA	NA	NA
DSLLYPSL	GACTCCTTGTTGTACCCAAGTCTG	WT	594	595	0.000159906	231	232	0.000171507	1041	1042	0.000166613	NA	NA	NA	NA	NA	NA	NA	NA	NA	387	388	8.24773e-05	202	203	9.39841e-05	76	77	9.63588e-05	198	199	0.000107093	1456	1457	0.000726302	11	12	1.66063e-05	117	118	3.34276e-05	414	415	8.96771e-05	NA	NA	NA	NA	NA
DSLYFMYL	GATTCTTTATACTTCATGTATCTG	WT	672	673	0.000180869	250	251	0.000185553	1014	1015	0.000162296	NA	NA	NA	NA	NA	NA	NA	NA	NA	465	466	9.90578e-05	212	213	9.86139e-05	74	75	9.38559e-05	1303	1304	0.000701753	472	473	0.000235787	20	21	2.9061e-05	51	52	1.47308e-05	94	95	2.05285e-05	NA	NA	NA	NA	NA
DSSFFAAL	GACAGCTCGTTCTTCGCCGCGCTG	WT	33	34	9.1375e-06	14	15	1.10888e-05	97	98	1.56699e-05	NA	NA	NA	NA	NA	NA	NA	NA	NA	25	26	5.52683e-06	9	10	4.62976e-06	NA	1	1.25141e-06	5	6	3.22893e-06	NA	1	4.98492e-07	NA	1	1.38386e-06	NA	1	2.83285e-07	NA	1	2.1609e-07	NA	NA	NA	NA	NA
DTFTYAKV	GATACGTTCACATACGCTAAAGTA	WT	245	246	6.61125e-05	88	89	6.57938e-05	424	425	6.79563e-05	NA	NA	NA	NA	NA	NA	NA	NA	NA	151	152	3.23107e-05	66	67	3.10194e-05	14	15	1.87712e-05	150	151	8.12613e-05	2	3	1.49547e-06	NA	1	1.38386e-06	2	3	8.49855e-07	3	4	8.64358e-07	NA	NA	NA	NA	NA
DVFAFQVL	GATGTTTTCGCTTTCCAAGTTCTT	WT	795	796	0.000213925	265	266	0.000196642	1231	1232	0.000196993	NA	NA	NA	NA	NA	NA	NA	NA	NA	542	543	0.000115426	284	285	0.000131948	78	79	9.88616e-05	102	103	5.54299e-05	524	525	0.000261708	366	367	0.000507875	1253	1254	0.000355239	956	957	0.000206798	NA	NA	NA	NA	NA
DVWLFAPL	GACGTGTGGCTCTTTGCTCCTTTG	WT	393	394	0.000105887	159	160	0.000118281	730	731	0.000116885	NA	NA	NA	NA	NA	NA	NA	NA	NA	243	244	5.18672e-05	130	131	6.06499e-05	34	35	4.37994e-05	5836	5837	0.00314121	164	165	8.22511e-05	76	77	0.000106557	40	41	1.16147e-05	215	216	4.66753e-05	NA	NA	NA	NA	NA
EAFDYLHL	GAGGCGTTCGACTATCTCCATCTA	WT	620	621	0.000166894	258	259	0.000191467	1190	1191	0.000190437	NA	NA	NA	NA	NA	NA	NA	NA	NA	423	424	9.01298e-05	208	209	9.6762e-05	73	74	9.26045e-05	123	124	6.67311e-05	17	18	8.97285e-06	21	22	3.04448e-05	483	484	0.00013711	1622	1623	0.000350713	NA	NA	NA	NA	NA
EAFHLALL	GAAGCCTTCCACCTGGCTCTACTA	WT	762	763	0.000205056	350	351	0.000259479	1509	1510	0.000241445	NA	NA	NA	NA	NA	NA	NA	NA	NA	501	502	0.00010671	213	214	9.90769e-05	83	84	0.000105119	531	532	0.000286298	437	438	0.000218339	76	77	0.000106557	828	829	0.000234843	246	247	5.33741e-05	NA	NA	NA	NA	NA
EAYKWYEL	GAGGCTTATAAGTGGTATGAATTG	WT	871	872	0.00023435	313	314	0.000232126	1515	1516	0.000242404	NA	NA	NA	NA	NA	NA	NA	NA	NA	461	462	9.82075e-05	221	222	0.000102781	67	68	8.50961e-05	309	310	0.000166828	1011	1012	0.000504473	63	64	8.85667e-05	495	496	0.000140509	2238	2239	0.000483824	NA	NA	NA	NA	NA
EIFMLSAL	GAAATCTTCATGCTGTCCGCGTTG	WT	111	112	3.01e-05	61	62	4.58339e-05	248	249	3.98144e-05	NA	NA	NA	NA	NA	NA	NA	NA	NA	89	90	1.91313e-05	61	62	2.87045e-05	10	11	1.37655e-05	1	2	1.07631e-06	12	13	6.48039e-06	57	58	8.02636e-05	168	169	4.78752e-05	2913	2914	0.000629685	NA	NA	NA	NA	NA
EIISFQHL	GAGATAATTAGCTTTCAACACTTG	WT	385	386	0.000103737	155	156	0.000115324	718	719	0.000114966	NA	NA	NA	NA	NA	NA	NA	NA	NA	272	273	5.80317e-05	113	114	5.27793e-05	37	38	4.75537e-05	14	15	8.07232e-06	879	880	0.000438673	324	325	0.000449753	130	131	3.71103e-05	115	116	2.50664e-05	NA	NA	NA	NA	NA
EIMRFLSL	GAGATAATGCGGTTCTTAAGTCTA	WT	678	679	0.000182481	210	211	0.000155983	1214	1215	0.000194275	NA	NA	NA	NA	NA	NA	NA	NA	NA	396	397	8.43904e-05	134	135	6.25018e-05	58	59	7.38333e-05	360	361	0.000194274	568	569	0.000283642	1	2	2.76771e-06	90	91	2.57789e-05	301	302	6.5259e-05	NA	NA	NA	NA	NA
EIMSYVPL	GAAATCATGAGCTATGTTCCGTTG	WT	309	310	8.33125e-05	108	109	8.05789e-05	466	467	7.46719e-05	NA	NA	NA	NA	NA	NA	NA	NA	NA	203	204	4.33644e-05	92	93	4.30568e-05	27	28	3.50396e-05	56	57	3.06748e-05	NA	1	4.98492e-07	11	12	1.66063e-05	349	350	9.91497e-05	928	929	0.000200747	NA	NA	NA	NA	NA
EIYSFGRV	GAGATATACAGTTTTGGCCGTGTT	WT	754	755	0.000202906	253	254	0.000187771	1335	1336	0.000213623	NA	NA	NA	NA	NA	NA	NA	NA	NA	453	454	9.6507e-05	178	179	8.28727e-05	73	74	9.26045e-05	72	73	3.92853e-05	175	176	8.77345e-05	349	350	0.000484349	1873	1874	0.000530876	1594	1595	0.000344663	NA	NA	NA	NA	NA
EMLKFLSL	GAGATGTTAAAGTTTCTGAGCCTA	WT	223	224	6.02e-05	115	116	8.57537e-05	562	563	9.00221e-05	NA	NA	NA	NA	NA	NA	NA	NA	NA	176	177	3.7625e-05	74	75	3.47232e-05	23	24	3.00339e-05	20	21	1.13012e-05	1	2	9.96983e-07	1	2	2.76771e-06	NA	1	2.83285e-07	728	729	0.000157529	NA	NA	NA	NA	NA
ENLCFAGL	GAAAACCTATGCTTTGCAGGACTT	WT	324	325	8.73437e-05	118	119	8.79714e-05	602	603	9.6418e-05	NA	NA	NA	NA	NA	NA	NA	NA	NA	244	245	5.20797e-05	131	132	6.11128e-05	39	40	5.00565e-05	94	95	5.11247e-05	15	16	7.97587e-06	14	15	2.07578e-05	20	21	5.94898e-06	18	19	4.1057e-06	NA	NA	NA	NA	NA
EQFLYHLL	GAGCAATTCCTGTACCATTTACTC	WT	1204	1205	0.000323844	420	421	0.000311227	1796	1797	0.000287335	NA	NA	NA	NA	NA	NA	NA	NA	NA	773	774	0.000164529	306	307	0.000142134	116	117	0.000146415	260	261	0.000140458	127	128	6.38069e-05	18	19	2.62932e-05	330	331	9.37673e-05	1244	1245	0.000269031	NA	NA	NA	NA	NA
ESFMLASM	GAGTCGTTCATGCTGGCCTCAATG	WT	60	61	1.63937e-05	26	27	1.99599e-05	132	133	2.12663e-05	NA	NA	NA	NA	NA	NA	NA	NA	NA	42	43	9.14053e-06	7	8	3.70381e-06	10	11	1.37655e-05	NA	1	5.38154e-07	1	2	9.96983e-07	NA	1	1.38386e-06	NA	1	2.83285e-07	97	98	2.11768e-05	NA	NA	NA	NA	NA
ESLRFLHV	GAGAGCTTGCGCTTTCTCCATGTG	WT	157	158	4.24625e-05	77	78	5.76619e-05	411	412	6.58776e-05	NA	NA	NA	NA	NA	NA	NA	NA	NA	92	93	1.9769e-05	55	56	2.59267e-05	24	25	3.12853e-05	82	83	4.46668e-05	1	2	9.96983e-07	4	5	6.91928e-06	1	2	5.6657e-07	47	48	1.03723e-05	NA	NA	NA	NA	NA
ESMSYQKL	GAGAGCATGAGCTATCAGAAACTT	WT	164	165	4.43437e-05	64	65	4.80516e-05	309	310	4.95681e-05	NA	NA	NA	NA	NA	NA	NA	NA	NA	115	116	2.46582e-05	39	40	1.8519e-05	20	21	2.62797e-05	1	2	1.07631e-06	NA	1	4.98492e-07	8	9	1.24547e-05	9	10	2.83285e-06	5	6	1.29654e-06	NA	NA	NA	NA	NA
ESRIFTFL	GAGTCTCGGATCTTTACCTTTCTT	WT	1465	1466	0.000393987	510	511	0.00037776	2441	2442	0.000390469	NA	NA	NA	NA	NA	NA	NA	NA	NA	906	907	0.000192801	447	448	0.000207413	161	162	0.000202729	1164	1165	0.00062695	126	127	6.33084e-05	58	59	8.16475e-05	320	321	9.09345e-05	4566	4567	0.000986881	NA	NA	NA	NA	NA
ESYFNSSL	GAGTCCTACTTTAATTCGAGCTTA	WT	428	429	0.000115294	154	155	0.000114585	796	797	0.000127438	NA	NA	NA	NA	NA	NA	NA	NA	NA	230	231	4.91038e-05	130	131	6.06499e-05	42	43	5.38107e-05	11	12	6.45785e-06	90	91	4.53627e-05	22	23	3.18287e-05	221	222	6.28893e-05	1217	1218	0.000263197	NA	NA	NA	NA	NA
ETFDYSQL	GAAACCTTTGACTATTCACAACTT	WT	317	318	8.54625e-05	158	159	0.000117542	651	652	0.000104253	NA	NA	NA	NA	NA	NA	NA	NA	NA	213	214	4.54901e-05	112	113	5.23163e-05	30	31	3.87938e-05	14	15	8.07232e-06	26	27	1.34593e-05	2	3	4.15157e-06	171	172	4.8725e-05	68	69	1.49102e-05	NA	NA	NA	NA	NA
ETFEHMPL	GAAACATTCGAGCACATGCCACTC	WT	145	146	3.92375e-05	44	45	3.32665e-05	290	291	4.65301e-05	NA	NA	NA	NA	NA	NA	NA	NA	NA	89	90	1.91313e-05	26	27	1.25004e-05	19	20	2.50283e-05	22	23	1.23775e-05	NA	1	4.98492e-07	83	84	0.000116244	NA	1	2.83285e-07	NA	1	2.1609e-07	NA	NA	NA	NA	NA
ETFNFCHL	GAGACGTTCAACTTCTGTCATTTG	WT	375	376	0.00010105	116	117	8.64929e-05	523	524	8.37861e-05	NA	NA	NA	NA	NA	NA	NA	NA	NA	232	233	4.95289e-05	107	108	5.00014e-05	37	38	4.75537e-05	39	40	2.15262e-05	154	155	7.72662e-05	1	2	2.76771e-06	1	2	5.6657e-07	126	127	2.74434e-05	NA	NA	NA	NA	NA
ETFNLHYL	GAAACATTTAATCTGCATTACCTG	WT	1119	1120	0.000301	459	460	0.000340058	1842	1843	0.00029469	NA	NA	NA	NA	NA	NA	NA	NA	NA	746	747	0.00015879	313	314	0.000145374	138	139	0.000173946	865	866	0.000466042	20	21	1.04683e-05	96	97	0.000134234	286	287	8.13028e-05	1048	1049	0.000226678	NA	NA	NA	NA	NA
EVFNFLLV	GAGGTTTTCAATTTCCTCCTAGTC	WT	1784	1785	0.000479719	579	580	0.000428768	2779	2780	0.000444514	NA	NA	NA	NA	NA	NA	NA	NA	NA	1087	1088	0.000231277	496	497	0.000230099	174	175	0.000218997	2409	2410	0.00129695	1296	1297	0.000646544	229	230	0.000318287	2997	2998	0.000849288	2552	2553	0.000551677	NA	NA	NA	NA	NA
EVFPFSSV	GAAGTCTTTCCGTTCAGTTCTGTC	WT	1031	1032	0.00027735	381	382	0.000282396	1736	1737	0.000277741	NA	NA	NA	NA	NA	NA	NA	NA	NA	621	622	0.000132219	278	279	0.00012917	103	104	0.000130147	149	150	8.07232e-05	967	968	0.00048254	24	25	3.45964e-05	506	507	0.000143625	2115	2116	0.000457245	NA	NA	NA	NA	NA
EVYLFSHI	GAGGTGTACCTGTTTTCCCATATT	WT	533	534	0.000143512	170	171	0.000126413	862	863	0.000137991	NA	NA	NA	NA	NA	NA	NA	NA	NA	313	314	6.67471e-05	136	137	6.34277e-05	48	49	6.13192e-05	164	165	8.87955e-05	40	41	2.04382e-05	4	5	6.91928e-06	74	75	2.12464e-05	16	17	3.67352e-06	NA	NA	NA	NA	NA
FAAAHSNL	TTCGCCGCTGCTCACAGTAATCTC	WT	260	261	7.01437e-05	93	94	6.949e-05	575	576	9.21007e-05	NA	NA	NA	NA	NA	NA	NA	NA	NA	155	156	3.3161e-05	99	100	4.62976e-05	20	21	2.62797e-05	11	12	6.45785e-06	60	61	3.0408e-05	NA	1	1.38386e-06	35	36	1.01983e-05	79	80	1.72872e-05	NA	NA	NA	NA	NA
FAFCASHV	TTCGCCTTTTGTGCGAGCCATGTT	WT	217	218	5.85875e-05	72	73	5.39657e-05	242	243	3.8855e-05	NA	NA	NA	NA	NA	NA	NA	NA	NA	122	123	2.61462e-05	44	45	2.08339e-05	22	23	2.87825e-05	53	54	2.90603e-05	10	11	5.48341e-06	1	2	2.76771e-06	38	39	1.10481e-05	NA	1	2.1609e-07	NA	NA	NA	NA	NA
FAFLVSSL	TTCGCCTTCTTAGTGAGCTCGCTA	WT	317	318	8.54625e-05	106	107	7.91004e-05	478	479	7.65907e-05	NA	NA	NA	NA	NA	NA	NA	NA	NA	216	217	4.61278e-05	98	99	4.58346e-05	28	29	3.6291e-05	70	71	3.8209e-05	2210	2211	0.00110216	44	45	6.22735e-05	1	2	5.6657e-07	96	97	2.09607e-05	NA	NA	NA	NA	NA
FAFNVTHL	TTCGCTTTTAATGTCACTCATTTA	WT	1300	1301	0.000349644	460	461	0.000340797	2002	2003	0.000320274	NA	NA	NA	NA	NA	NA	NA	NA	NA	774	775	0.000164742	406	407	0.000188431	119	120	0.00015017	698	699	0.00037617	52	53	2.64201e-05	36	37	5.12026e-05	5015	5016	0.00142096	1356	1357	0.000293233	NA	NA	NA	NA	NA
FAFQYNPS	TTCGCTTTTCAGTACAATCCTAGC	WT	784	785	0.000210969	257	258	0.000190728	1152	1153	0.000184361	NA	NA	NA	NA	NA	NA	NA	NA	NA	390	391	8.3115e-05	201	202	9.35212e-05	80	81	0.000101364	141	142	7.64179e-05	428	429	0.000213853	229	230	0.000318287	156	157	4.44757e-05	3351	3352	0.000724332	NA	NA	NA	NA	NA
FAFVEFEL	TTCGCATTCGTCGAATTTGAGTTG	WT	375	376	0.00010105	106	107	7.91004e-05	706	707	0.000113047	NA	NA	NA	NA	NA	NA	NA	NA	NA	282	283	6.01574e-05	130	131	6.06499e-05	34	35	4.37994e-05	304	305	0.000164137	198	199	9.91998e-05	NA	1	1.38386e-06	492	493	0.000139659	380	381	8.23301e-05	NA	NA	NA	NA	NA
FAFVHVSF	TTTGCCTTTGTTCATGTCTCTTTT	WT	2354	2355	0.000632906	741	742	0.000548528	3513	3514	0.000561878	NA	NA	NA	NA	NA	NA	NA	NA	NA	1460	1461	0.000310565	736	737	0.000341213	257	258	0.000322864	1286	1287	0.000692605	362	363	0.000180952	302	303	0.000419308	2363	2364	0.000669686	3096	3097	0.000669229	NA	NA	NA	NA	NA
FAFVTGNL	TTTGCATTTGTAACAGGTAATCTA	WT	1163	1164	0.000312825	528	529	0.000391066	1831	1832	0.000292931	NA	NA	NA	NA	NA	NA	NA	NA	NA	669	670	0.000142422	369	370	0.000171301	109	110	0.000137655	77	78	4.1976e-05	155	156	7.77647e-05	15	16	2.21417e-05	461	462	0.000130878	1087	1088	0.000235105	NA	NA	NA	NA	NA
FAIIFFLM	TTTGCTATAATTTTCTTTCTAATG	WT	1440	1441	0.000387269	511	512	0.000378499	2315	2316	0.000370322	NA	NA	NA	NA	NA	NA	NA	NA	NA	918	919	0.000195352	441	442	0.000204635	168	169	0.000211489	185	186	0.000100097	226	227	0.000113158	274	275	0.00038056	303	304	8.61186e-05	3533	3534	0.00076366	NA	NA	NA	NA	NA
FALFLGNL	TTTGCACTTTTCCTTGGGAATCTG	WT	959	960	0.000258	342	343	0.000253565	1783	1784	0.000285256	NA	NA	NA	NA	NA	NA	NA	NA	NA	620	621	0.000132006	317	318	0.000147226	103	104	0.000130147	951	952	0.000512323	44037	44038	0.0219526	26	27	3.73641e-05	433	434	0.000122946	882	883	0.000190807	NA	NA	NA	NA	NA
FALRVFSL	TTCGCCTTACGCGTCTTTTCGCTG	WT	51	52	1.3975e-05	13	14	1.03496e-05	27	28	4.47712e-06	NA	NA	NA	NA	NA	NA	NA	NA	NA	19	20	4.25141e-06	4	5	2.31488e-06	5	6	7.50848e-06	8	9	4.84339e-06	NA	1	4.98492e-07	NA	1	1.38386e-06	NA	1	2.83285e-07	NA	1	2.1609e-07	NA	NA	NA	NA	NA
FALVRTAL	TTCGCCTTAGTCCGCACTGCACTG	WT	66	67	1.80062e-05	33	34	2.51347e-05	149	150	2.39846e-05	NA	NA	NA	NA	NA	NA	NA	NA	NA	62	63	1.33919e-05	37	38	1.75931e-05	15	16	2.00226e-05	14	15	8.07232e-06	11	12	5.9819e-06	NA	1	1.38386e-06	NA	1	2.83285e-07	45	46	9.94012e-06	NA	NA	NA	NA	NA
FAMLATLL	TTCGCTATGTTAGCAACGCTTCTT	WT	712	713	0.000191619	248	249	0.000184075	1112	1113	0.000177965	NA	NA	NA	NA	NA	NA	NA	NA	NA	416	417	8.86419e-05	200	201	9.30582e-05	62	63	7.8839e-05	4	5	2.69077e-06	101	102	5.08461e-05	8	9	1.24547e-05	2151	2152	0.000609629	88	89	1.9232e-05	NA	NA	NA	NA	NA
FAMYCLLL	TTTGCCATGTATTGCCTTCTATTG	WT	1788	1789	0.000480794	608	609	0.000450207	3039	3040	0.000486087	NA	NA	NA	NA	NA	NA	NA	NA	NA	1127	1128	0.000239779	524	525	0.000243062	202	203	0.000254037	336	337	0.000181358	1607	1608	0.000801574	221	222	0.000307216	2731	2732	0.000773934	3631	3632	0.000784837	NA	NA	NA	NA	NA
FAPYFGHM	TTCGCGCCCTACTTCGGGCATATG	WT	111	112	3.01e-05	42	43	3.1788e-05	233	234	3.74159e-05	NA	NA	NA	NA	NA	NA	NA	NA	NA	76	77	1.63679e-05	42	43	1.9908e-05	20	21	2.62797e-05	NA	1	5.38154e-07	NA	1	4.98492e-07	NA	1	1.38386e-06	NA	1	2.83285e-07	26	27	5.83442e-06	NA	NA	NA	NA	NA
FAQIFEPL	TTTGCGCAGATCTTTGAACCACTG	WT	190	191	5.13312e-05	74	75	5.54442e-05	380	381	6.09208e-05	NA	NA	NA	NA	NA	NA	NA	NA	NA	169	170	3.6137e-05	59	60	2.77786e-05	21	22	2.75311e-05	66	67	3.60563e-05	1	2	9.96983e-07	120	121	0.000167446	195	196	5.55238e-05	3691	3692	0.000797802	NA	NA	NA	NA	NA
FARSFHPM	TTTGCTCGAAGCTTCCACCCAATG	WT	511	512	0.0001376	195	196	0.000144894	1066	1067	0.00017061	NA	NA	NA	NA	NA	NA	NA	NA	NA	348	349	7.41871e-05	165	166	7.6854e-05	57	58	7.25819e-05	283	284	0.000152836	386	387	0.000192916	30	31	4.28995e-05	18	19	5.38241e-06	20	21	4.53788e-06	NA	NA	NA	NA	NA
FASLFFIL	TTTGCATCCCTCTTCTTCATCTTA	WT	3647	3648	0.0009804	1311	1312	0.000969903	5443	5444	0.00087048	NA	NA	NA	NA	NA	NA	NA	NA	NA	2259	2260	0.000480409	1108	1109	0.00051344	387	388	0.000485548	3098	3099	0.00166774	1822	1823	0.00090875	662	663	0.000917496	1659	1660	0.000470253	4179	4180	0.000903254	NA	NA	NA	NA	NA
FATFFPEI	TTTGCAACGTTCTTCCCAGAGATA	WT	323	324	8.7075e-05	91	92	6.80115e-05	560	561	8.97023e-05	NA	NA	NA	NA	NA	NA	NA	NA	NA	229	230	4.88912e-05	104	105	4.86125e-05	27	28	3.50396e-05	633	634	0.00034119	34	35	1.74472e-05	6	7	9.68699e-06	38	39	1.10481e-05	4062	4063	0.000877972	NA	NA	NA	NA	NA
FAVLWLPL	TTTGCGGTCCTCTGGCTACCTCTG	WT	160	161	4.32687e-05	101	102	7.54041e-05	374	375	5.99614e-05	NA	NA	NA	NA	NA	NA	NA	NA	NA	136	137	2.91221e-05	66	67	3.10194e-05	27	28	3.50396e-05	25	26	1.3992e-05	1061	1062	0.000529398	1	2	2.76771e-06	161	162	4.58922e-05	169	170	3.67352e-05	NA	NA	NA	NA	NA
FAVLYTAI	TTCGCTGTCCTGTATACAGCTATC	WT	974	975	0.000262031	408	409	0.000302356	1827	1828	0.000292292	NA	NA	NA	NA	NA	NA	NA	NA	NA	624	625	0.000132856	283	284	0.000131485	108	109	0.000136404	508	509	0.000273921	222	223	0.000111164	18	19	2.62932e-05	690	691	0.00019575	305	306	6.61234e-05	NA	NA	NA	NA	NA
FAVNHFTL	TTTGCCGTGAATCATTTTACTTTG	WT	773	774	0.000208012	253	254	0.000187771	1433	1434	0.000229292	NA	NA	NA	NA	NA	NA	NA	NA	NA	534	535	0.000113725	236	237	0.000109725	92	93	0.000116381	632	633	0.000340652	253	254	0.000126617	90	91	0.000125931	399	400	0.000113314	387	388	8.38427e-05	NA	NA	NA	NA	NA
FAWFEYAL	TTCGCGTGGTTCGAATACGCTCTA	WT	210	211	5.67062e-05	109	110	8.13181e-05	496	497	7.94689e-05	NA	NA	NA	NA	NA	NA	NA	NA	NA	186	187	3.97507e-05	76	77	3.56492e-05	34	35	4.37994e-05	46	47	2.52933e-05	138	139	6.92903e-05	57	58	8.02636e-05	759	760	0.000215297	49	50	1.08045e-05	NA	NA	NA	NA	NA
FAYIYFST	TTTGCTTACATATACTTTTCAACA	WT	1101	1102	0.000296162	367	368	0.000272046	1758	1759	0.000281259	NA	NA	NA	NA	NA	NA	NA	NA	NA	727	728	0.000154751	349	350	0.000162042	121	122	0.000152672	867	868	0.000467118	365	366	0.000182448	21	22	3.04448e-05	956	957	0.000271104	1409	1410	0.000304686	NA	NA	NA	NA	NA
FAYLREHF	TTTGCCTATCTCAGGGAACATTTC	WT	274	275	7.39062e-05	90	91	6.72723e-05	468	469	7.49917e-05	NA	NA	NA	NA	NA	NA	NA	NA	NA	176	177	3.7625e-05	45	46	2.12969e-05	32	33	4.12966e-05	231	232	0.000124852	187	188	9.37164e-05	2	3	4.15157e-06	4	5	1.41642e-06	483	484	0.000104587	NA	NA	NA	NA	NA
FCMMFANM	TTCTGTATGATGTTTGCGAACATG	WT	503	504	0.00013545	166	167	0.000123456	919	920	0.000147105	NA	NA	NA	NA	NA	NA	NA	NA	NA	338	339	7.20614e-05	149	150	6.94464e-05	56	57	7.13305e-05	42	43	2.31406e-05	525	526	0.000262207	21	22	3.04448e-05	3	4	1.13314e-06	162	163	3.52226e-05	NA	NA	NA	NA	NA
FEKIILSN	TTCGAGAAAATAATACTCAGCAAC	WT	1480	1481	0.000398019	564	565	0.000417679	2398	2399	0.000383593	NA	NA	NA	NA	NA	NA	NA	NA	NA	905	906	0.000192589	353	354	0.000163894	174	175	0.000218997	203	204	0.000109783	159	160	7.97587e-05	183	184	0.000254629	1471	1472	0.000416995	9185	9186	0.001985	NA	NA	NA	NA	NA
FFCLFSRL	TTCTTCTGTCTTTTCAGCCGGTTA	WT	478	479	0.000128731	187	188	0.00013898	810	811	0.000129677	NA	NA	NA	NA	NA	NA	NA	NA	NA	333	334	7.09985e-05	196	197	9.12063e-05	48	49	6.13192e-05	207	208	0.000111936	387	388	0.000193415	37	38	5.25865e-05	259	260	7.36541e-05	1211	1212	0.0002619	NA	NA	NA	NA	NA
FFFRVAAL	TTCTTCTTTCGGGTTGCTGCTTTA	WT	854	855	0.000229781	341	342	0.000252825	1404	1405	0.000224655	NA	NA	NA	NA	NA	NA	NA	NA	NA	536	537	0.00011415	260	261	0.000120837	91	92	0.00011513	183	184	9.90204e-05	80	81	4.03778e-05	4	5	6.91928e-06	84	85	2.40792e-05	185	186	4.01926e-05	NA	NA	NA	NA	NA
FFLYFGDL	TTCTTTCTTTACTTCGGTGACTTG	WT	743	744	0.00019995	243	244	0.000180378	1155	1156	0.000184841	NA	NA	NA	NA	NA	NA	NA	NA	NA	432	433	9.2043e-05	258	259	0.000119911	67	68	8.50961e-05	854	855	0.000460122	1742	1743	0.000868871	157	158	0.000218649	48	49	1.3881e-05	255	256	5.53189e-05	NA	NA	NA	NA	NA
FFLYHIHL	TTCTTTCTGTACCATATTCATCTC	WT	1961	1962	0.000527287	630	631	0.00046647	2858	2859	0.000457146	NA	NA	NA	NA	NA	NA	NA	NA	NA	1119	1120	0.000238079	532	533	0.000246766	219	220	0.000275311	187	188	0.000101173	3576	3577	0.0017831	156	157	0.000217265	631	632	0.000179036	1703	1704	0.000368217	NA	NA	NA	NA	NA
FFPSFCML	TTCTTTCCCTCGTTTTGTATGCTA	WT	2216	2217	0.000595819	826	827	0.000611364	3433	3434	0.000549087	NA	NA	NA	NA	NA	NA	NA	NA	NA	1416	1417	0.000301212	630	631	0.000292138	240	241	0.00030159	113	114	6.13496e-05	630	631	0.000314548	9	10	1.38386e-05	1687	1688	0.000478185	2687	2688	0.000580849	NA	NA	NA	NA	NA
FFRFMNVL	TTCTTTCGCTTCATGAACGTACTA	WT	212	213	5.72437e-05	71	72	5.32264e-05	430	431	6.89157e-05	NA	NA	NA	NA	NA	NA	NA	NA	NA	153	154	3.27358e-05	57	58	2.68526e-05	19	20	2.50283e-05	59	60	3.22893e-05	NA	1	4.98492e-07	197	198	0.000274003	165	166	4.70253e-05	598	599	0.000129438	NA	NA	NA	NA	NA
FFSFLGLL	TTCTTTAGCTTTCTGGGGCTATTA	WT	572	573	0.000153994	200	201	0.00014859	948	949	0.000151742	NA	NA	NA	NA	NA	NA	NA	NA	NA	319	320	6.80225e-05	151	152	7.03724e-05	50	51	6.3822e-05	78	79	4.25142e-05	238	239	0.000119139	NA	1	1.38386e-06	333	334	9.46172e-05	59	60	1.29654e-05	NA	NA	NA	NA	NA
FGAKYVSL	TTCGGGGCAAAGTACGTTTCACTG	WT	256	257	6.90687e-05	68	69	5.10086e-05	514	515	8.2347e-05	NA	NA	NA	NA	NA	NA	NA	NA	NA	175	176	3.74124e-05	69	70	3.24083e-05	29	30	3.75424e-05	27	28	1.50683e-05	3	4	1.99397e-06	3	4	5.53542e-06	161	162	4.58922e-05	13	14	3.02525e-06	NA	NA	NA	NA	NA
FGFFGTTV	TTTGGTTTCTTTGGTACTACAGTC	WT	980	981	0.000263644	359	360	0.000266132	1633	1634	0.000261272	NA	NA	NA	NA	NA	NA	NA	NA	NA	635	636	0.000135195	320	321	0.000148615	106	107	0.000133901	59	60	3.22893e-05	20	21	1.04683e-05	6	7	9.68699e-06	201	202	5.72236e-05	2374	2375	0.000513213	NA	NA	NA	NA	NA
FGFFTPLL	TTTGGGTTCTTTACCCCTCTTCTG	WT	618	619	0.000166356	180	181	0.000133805	1038	1039	0.000166133	NA	NA	NA	NA	NA	NA	NA	NA	NA	395	396	8.41779e-05	185	186	8.61135e-05	46	47	5.88164e-05	105	106	5.70444e-05	85	86	4.28703e-05	40	41	5.67381e-05	301	302	8.5552e-05	194	195	4.21375e-05	NA	NA	NA	NA	NA
FGFLSGML	TTCGGTTTCCTTAGTGGTATGTTG	WT	2857	2858	0.000768087	941	942	0.000696379	4788	4789	0.000765747	NA	NA	NA	NA	NA	NA	NA	NA	NA	1739	1740	0.000369872	829	830	0.00038427	331	332	0.000415469	1814	1815	0.00097675	679	680	0.000338974	943	944	0.00130636	3977	3978	0.00112691	2295	2296	0.000496142	NA	NA	NA	NA	NA
FGGCFAQM	TTCGGAGGGTGCTTTGCCCAAATG	WT	152	153	4.11187e-05	63	64	4.73124e-05	189	190	3.03804e-05	NA	NA	NA	NA	NA	NA	NA	NA	NA	82	83	1.76433e-05	25	26	1.20374e-05	12	13	1.62684e-05	1	2	1.07631e-06	4	5	2.49246e-06	NA	1	1.38386e-06	733	734	0.000207931	3368	3369	0.000728006	NA	NA	NA	NA	NA
FGIYSSFL	TTTGGCATATACTCTAGTTTCTTA	WT	1247	1248	0.0003354	432	433	0.000320098	2054	2055	0.000328589	NA	NA	NA	NA	NA	NA	NA	NA	NA	829	830	0.000176433	384	385	0.000178246	163	164	0.000205232	519	520	0.00027984	746	747	0.000372373	2914	2915	0.00403394	279	280	7.93198e-05	4474	4475	0.000967001	NA	NA	NA	NA	NA
FGLIWGLM	TTTGGCCTAATTTGGGGTCTTATG	WT	346	347	9.32562e-05	110	111	8.20574e-05	622	623	9.96159e-05	NA	NA	NA	NA	NA	NA	NA	NA	NA	150	151	3.20981e-05	74	75	3.47232e-05	27	28	3.50396e-05	1336	1337	0.000719512	41	42	2.09366e-05	21	22	3.04448e-05	196	197	5.58071e-05	184	185	3.99766e-05	NA	NA	NA	NA	NA
FGLVFDHV	TTCGGACTAGTCTTTGATCACGTC	WT	371	372	9.9975e-05	119	120	8.87107e-05	544	545	8.71439e-05	NA	NA	NA	NA	NA	NA	NA	NA	NA	195	196	4.16638e-05	106	107	4.95384e-05	31	32	4.00452e-05	7	8	4.30523e-06	1	2	9.96983e-07	1	2	2.76771e-06	10	11	3.11613e-06	63	64	1.38297e-05	NA	NA	NA	NA	NA
FGMSVFNL	TTCGGTATGTCTGTGTTCAACCTA	WT	3279	3280	0.0008815	1314	1315	0.000972121	6237	6238	0.000997438	NA	NA	NA	NA	NA	NA	NA	NA	NA	2151	2152	0.000457451	919	920	0.000425938	401	402	0.000503068	166	167	8.98718e-05	641	642	0.000320032	180	181	0.000250478	657	658	0.000186401	1640	1641	0.000354603	NA	NA	NA	NA	NA
FGPFFCIL	TTCGGACCCTTCTTTTGCATATTG	WT	NA	1	2.6875e-07	NA	1	7.39256e-07	NA	1	1.59897e-07	NA	NA	NA	NA	NA	NA	NA	NA	NA	NA	1	2.1257e-07	NA	1	4.62976e-07	NA	1	1.25141e-06	NA	1	5.38154e-07	NA	1	4.98492e-07	NA	1	1.38386e-06	NA	1	2.83285e-07	NA	1	2.1609e-07	NA	NA	NA	NA	NA
FGPYHIGL	TTTGGACCTTACCACATAGGACTG	WT	135	136	3.655e-05	33	34	2.51347e-05	214	215	3.43779e-05	NA	NA	NA	NA	NA	NA	NA	NA	NA	65	66	1.40296e-05	37	38	1.75931e-05	17	18	2.25254e-05	11	12	6.45785e-06	NA	1	4.98492e-07	282	283	0.000391631	92	93	2.63455e-05	9	10	2.1609e-06	NA	NA	NA	NA	NA
FGQRYIHI	TTCGGACAGCGATACATACATATT	WT	1215	1216	0.0003268	418	419	0.000309748	2078	2079	0.000332426	NA	NA	NA	NA	NA	NA	NA	NA	NA	702	703	0.000149437	309	310	0.000143523	120	121	0.000151421	69	70	3.76708e-05	65	66	3.29004e-05	2	3	4.15157e-06	3903	3904	0.00110594	230	231	4.99167e-05	NA	NA	NA	NA	NA
FGTVYTML	TTCGGTACGGTATACACTATGTTG	WT	479	480	0.000129	146	147	0.000108671	725	726	0.000116085	NA	NA	NA	NA	NA	NA	NA	NA	NA	284	285	6.05826e-05	128	129	5.97239e-05	42	43	5.38107e-05	31	32	1.72209e-05	408	409	0.000203883	28	29	4.01318e-05	1723	1724	0.000488383	53	54	1.16688e-05	NA	NA	NA	NA	NA
FGYELAVI	TTTGGTTATGAGTTAGCAGTAATA	WT	1502	1503	0.000403931	645	646	0.000477559	2436	2437	0.000389669	NA	NA	NA	NA	NA	NA	NA	NA	NA	954	955	0.000203005	397	398	0.000184264	142	143	0.000178952	165	166	8.93336e-05	17	18	8.97285e-06	682	683	0.000945173	335	336	9.51837e-05	5914	5915	0.00127817	NA	NA	NA	NA	NA
FGYKEIPM	TTCGGGTATAAAGAGATTCCGATG	WT	183	184	4.945e-05	59	60	4.43553e-05	299	300	4.79691e-05	NA	NA	NA	NA	NA	NA	NA	NA	NA	94	95	2.01942e-05	43	44	2.03709e-05	23	24	3.00339e-05	48	49	2.63696e-05	3	4	1.99397e-06	1	2	2.76771e-06	28	29	8.21526e-06	29	30	6.48269e-06	NA	NA	NA	NA	NA
FGYMVSSI	TTTGGCTATATGGTTTCCTCCATA	WT	2438	2439	0.000655481	864	865	0.000639456	4017	4018	0.000642467	NA	NA	NA	NA	NA	NA	NA	NA	NA	1500	1501	0.000319068	638	639	0.000295842	221	222	0.000277814	1109	1110	0.000597351	297	298	0.00014855	141	142	0.000196507	431	432	0.000122379	11110	11111	0.00240097	NA	NA	NA	NA	NA
FGYRKTPI	TTCGGGTACAGGAAAACGCCTATC	WT	84	85	2.28437e-05	40	41	3.03095e-05	236	237	3.78956e-05	NA	NA	NA	NA	NA	NA	NA	NA	NA	91	92	1.95565e-05	29	30	1.38893e-05	10	11	1.37655e-05	NA	1	5.38154e-07	NA	1	4.98492e-07	NA	1	1.38386e-06	23	24	6.79884e-06	NA	1	2.1609e-07	NA	NA	NA	NA	NA
FGYTSYSV	TTTGGTTACACATCCTATAGTGTT	WT	1134	1135	0.000305031	434	435	0.000321576	1810	1811	0.000289574	NA	NA	NA	NA	NA	NA	NA	NA	NA	736	737	0.000156664	314	315	0.000145837	109	110	0.000137655	1106	1107	0.000595737	36	37	1.84442e-05	319	320	0.000442834	10728	10729	0.00303936	453	454	9.81046e-05	NA	NA	NA	NA	NA
FHFPIYYL	TTTCACTTCCCTATCTATTACCTC	WT	2498	2499	0.000671606	1009	1010	0.000746648	3870	3871	0.000618962	NA	NA	NA	NA	NA	NA	NA	NA	NA	1561	1562	0.000332035	713	714	0.000330565	257	258	0.000322864	654	655	0.000352491	378	379	0.000188928	60	61	8.44152e-05	1058	1059	0.000299999	2203	2204	0.000476261	NA	NA	NA	NA	NA
FHFRFWHF	TTTCATTTCCGCTTTTGGCATTTC	WT	929	930	0.000249937	386	387	0.000286092	1758	1759	0.000281259	NA	NA	NA	NA	NA	NA	NA	NA	NA	504	505	0.000107348	321	322	0.000149078	106	107	0.000133901	187	188	0.000101173	148	149	7.42752e-05	490	491	0.000679473	1851	1852	0.000524644	261	262	5.66155e-05	NA	NA	NA	NA	NA
FHVLYSSL	TTTCACGTCTTATACTCTTCACTG	WT	599	600	0.00016125	251	252	0.000186292	857	858	0.000137192	NA	NA	NA	NA	NA	NA	NA	NA	NA	362	363	7.71631e-05	187	188	8.70395e-05	54	55	6.88277e-05	298	299	0.000160908	4	5	2.49246e-06	53	54	7.47282e-05	599	600	0.000169971	774	775	0.000167469	NA	NA	NA	NA	NA
FIFFTALV	TTTATTTTCTTCACAGCGCTAGTA	WT	281	282	7.57875e-05	92	93	6.87508e-05	458	459	7.33928e-05	NA	NA	NA	NA	NA	NA	NA	NA	NA	174	175	3.71998e-05	80	81	3.75011e-05	18	19	2.37768e-05	99	100	5.38154e-05	21	22	1.09668e-05	1	2	2.76771e-06	14	15	4.24927e-06	95	96	2.07446e-05	NA	NA	NA	NA	NA
FIFGFNVI	TTTATCTTTGGTTTCAATGTTATA	WT	1088	1089	0.000292669	325	326	0.000240997	1868	1869	0.000298848	NA	NA	NA	NA	NA	NA	NA	NA	NA	683	684	0.000145398	352	353	0.000163431	105	106	0.00013265	4525	4526	0.00243569	625	626	0.000312056	258	259	0.000358418	305	306	8.66852e-05	2767	2768	0.000598136	NA	NA	NA	NA	NA
FIFGYTKI	TTTATCTTTGGCTATACTAAAATA	WT	964	965	0.000259344	365	366	0.000270568	1436	1437	0.000229772	NA	NA	NA	NA	NA	NA	NA	NA	NA	603	604	0.000128393	278	279	0.00012917	107	108	0.000135153	698	699	0.00037617	107	108	5.38371e-05	282	283	0.000391631	55	56	1.5864e-05	191	192	4.14892e-05	NA	NA	NA	NA	NA
FIFRGAQI	TTCATATTCCGCGGAGCACAAATC	WT	381	382	0.000102662	127	128	9.46247e-05	559	560	8.95424e-05	NA	NA	NA	NA	NA	NA	NA	NA	NA	241	242	5.1442e-05	77	78	3.61121e-05	32	33	4.12966e-05	345	346	0.000186201	4	5	2.49246e-06	4	5	6.91928e-06	13	14	3.96599e-06	58	59	1.27493e-05	NA	NA	NA	NA	NA
FIFSFHNA	TTCATATTCTCATTTCACAACGCT	WT	421	422	0.000113412	137	138	0.000102017	608	609	9.73773e-05	NA	NA	NA	NA	NA	NA	NA	NA	NA	226	227	4.82535e-05	125	126	5.8335e-05	29	30	3.75424e-05	48	49	2.63696e-05	129	130	6.48039e-05	1	2	2.76771e-06	56	57	1.61472e-05	46	47	1.01562e-05	NA	NA	NA	NA	NA
FIHNWPQL	TTTATCCATAACTGGCCCCAGCTT	WT	276	277	7.44437e-05	119	120	8.87107e-05	462	463	7.40324e-05	NA	NA	NA	NA	NA	NA	NA	NA	NA	183	184	3.9113e-05	80	81	3.75011e-05	30	31	3.87938e-05	14	15	8.07232e-06	11	12	5.9819e-06	88	89	0.000123163	4	5	1.41642e-06	94	95	2.05285e-05	NA	NA	NA	NA	NA
FIHTFTAM	TTTATACATACATTCACCGCTATG	WT	165	166	4.46125e-05	61	62	4.58339e-05	321	322	5.14869e-05	NA	NA	NA	NA	NA	NA	NA	NA	NA	103	104	2.21073e-05	57	58	2.68526e-05	16	17	2.1274e-05	91	92	4.95102e-05	14	15	7.47737e-06	1	2	2.76771e-06	295	296	8.38523e-05	25	26	5.61833e-06	NA	NA	NA	NA	NA
FIKSFQAL	TTCATCAAATCGTTTCAGGCTCTT	WT	375	376	0.00010105	155	156	0.000115324	560	561	8.97023e-05	NA	NA	NA	NA	NA	NA	NA	NA	NA	248	249	5.293e-05	97	98	4.53717e-05	43	44	5.50622e-05	49	50	2.69077e-05	39	40	1.99397e-05	4	5	6.91928e-06	2	3	8.49855e-07	378	379	8.18979e-05	NA	NA	NA	NA	NA
FILLFSKV	TTCATCTTATTGTTTTCAAAGGTT	WT	2138	2139	0.000574856	671	672	0.00049678	3225	3226	0.000515828	NA	NA	NA	NA	NA	NA	NA	NA	NA	1230	1231	0.000261674	554	555	0.000256952	187	188	0.000235266	493	494	0.000265848	386	387	0.000192916	86	87	0.000120395	2781	2782	0.000788099	1700	1701	0.000367568	NA	NA	NA	NA	NA
FILYSYYL	TTCATCTTGTACAGCTACTATCTA	WT	1075	1076	0.000289175	406	407	0.000300877	1726	1727	0.000276142	NA	NA	NA	NA	NA	NA	NA	NA	NA	754	755	0.000160491	260	261	0.000120837	116	117	0.000146415	1301	1302	0.000700677	249	250	0.000124623	59	60	8.30313e-05	3207	3208	0.000908778	2069	2070	0.000447305	NA	NA	NA	NA	NA
FIMIFVTL	TTTATTATGATCTTCGTAACTCTC	WT	1087	1088	0.0002924	351	352	0.000260218	1620	1621	0.000259193	NA	NA	NA	NA	NA	NA	NA	NA	NA	642	643	0.000136683	307	308	0.000142597	99	100	0.000125141	213	214	0.000115165	485	486	0.000242267	1	2	2.76771e-06	85	86	2.43625e-05	978	979	0.000211552	NA	NA	NA	NA	NA
FIQFFQDL	TTTATTCAATTCTTTCAAGACTTG	WT	791	792	0.00021285	266	267	0.000197381	1293	1294	0.000206907	NA	NA	NA	NA	NA	NA	NA	NA	NA	440	441	9.37435e-05	257	258	0.000119448	117	118	0.000147667	119	120	6.45785e-05	64	65	3.2402e-05	118	119	0.000164679	708	709	0.000200849	927	928	0.000200531	NA	NA	NA	NA	NA
FISHYTLL	TTCATCTCACATTATACTCTGTTA	WT	2832	2833	0.000761369	946	947	0.000700075	4419	4420	0.000706745	NA	NA	NA	NA	NA	NA	NA	NA	NA	1792	1793	0.000381139	782	783	0.00036251	302	303	0.000379178	2297	2298	0.00123668	469	470	0.000234291	254	255	0.000352883	4140	4141	0.00117308	4000	4001	0.000864574	NA	NA	NA	NA	NA
FISMFYIL	TTTATTTCAATGTTTTATATCCTG	WT	692	693	0.000186244	237	238	0.000175943	1055	1056	0.000168851	NA	NA	NA	NA	NA	NA	NA	NA	NA	414	415	8.82167e-05	205	206	9.53731e-05	66	67	8.38446e-05	105	106	5.70444e-05	86	87	4.33688e-05	162	163	0.000225568	1633	1634	0.000462888	98	99	2.13929e-05	NA	NA	NA	NA	NA
FIYAWSGF	TTTATATATGCGTGGAGCGGCTTT	WT	223	224	6.02e-05	66	67	4.95301e-05	444	445	7.11542e-05	NA	NA	NA	NA	NA	NA	NA	NA	NA	106	107	2.2745e-05	55	56	2.59267e-05	22	23	2.87825e-05	27	28	1.50683e-05	2	3	1.49547e-06	233	234	0.000323822	947	948	0.000268554	142	143	3.09008e-05	NA	NA	NA	NA	NA
FIYQYWKL	TTTATCTACCAGTACTGGAAACTT	WT	694	695	0.000186781	233	234	0.000172986	1200	1201	0.000192036	NA	NA	NA	NA	NA	NA	NA	NA	NA	409	410	8.71539e-05	178	179	8.28727e-05	55	56	7.00791e-05	107	108	5.81207e-05	15	16	7.97587e-06	4	5	6.91928e-06	259	260	7.36541e-05	565	566	0.000122307	NA	NA	NA	NA	NA
FIYTSKLL	TTTATCTATACTAGTAAGCTATTG	WT	1959	1960	0.00052675	751	752	0.00055592	3365	3366	0.000538214	NA	NA	NA	NA	NA	NA	NA	NA	NA	1278	1279	0.000271878	561	562	0.000260193	212	213	0.000266551	2017	2018	0.001086	206	207	0.000103188	35	36	4.98188e-05	194	195	5.52406e-05	1138	1139	0.000246126	NA	NA	NA	NA	NA
FKYTFHQV	TTCAAGTATACGTTCCACCAAGTC	WT	237	238	6.39625e-05	94	95	7.02293e-05	405	406	6.49182e-05	NA	NA	NA	NA	NA	NA	NA	NA	NA	154	155	3.29484e-05	58	59	2.73156e-05	31	32	4.00452e-05	4	5	2.69077e-06	1	2	9.96983e-07	NA	1	1.38386e-06	1	2	5.6657e-07	292	293	6.33142e-05	NA	NA	NA	NA	NA
FLALFRLL	TTTCTGGCCCTTTTCCGACTGCTT	WT	966	967	0.000259881	353	354	0.000261697	1570	1571	0.000251198	NA	NA	NA	NA	NA	NA	NA	NA	NA	611	612	0.000130093	311	312	0.000144449	87	88	0.000110124	431	432	0.000232483	1462	1463	0.000729293	48	49	6.78089e-05	646	647	0.000183285	720	721	0.000155801	NA	NA	NA	NA	NA
FLALYAFL	TTCCTGGCCCTCTACGCGTTCCTA	WT	469	470	0.000126312	217	218	0.000161158	867	868	0.000138791	NA	NA	NA	NA	NA	NA	NA	NA	NA	292	293	6.22831e-05	135	136	6.29647e-05	48	49	6.13192e-05	401	402	0.000216338	38	39	1.94412e-05	42	43	5.95058e-05	386	387	0.000109631	906	907	0.000195993	NA	NA	NA	NA	NA
FLFKVLNL	TTCCTGTTTAAAGTCCTGAATCTA	WT	1736	1737	0.000466819	707	708	0.000523393	2872	2873	0.000459384	NA	NA	NA	NA	NA	NA	NA	NA	NA	1097	1098	0.000233402	520	521	0.000241211	180	181	0.000226506	931	932	0.00050156	358	359	0.000178958	745	746	0.00103236	244	245	6.94048e-05	2036	2037	0.000440174	NA	NA	NA	NA	NA
FLFLTYLL	TTCTTATTCCTAACATATCTGCTT	WT	1425	1426	0.000383237	463	464	0.000343015	1936	1937	0.000309721	NA	NA	NA	NA	NA	NA	NA	NA	NA	813	814	0.000173032	347	348	0.000161116	133	134	0.000167689	347	348	0.000187278	169	170	8.47436e-05	164	165	0.000228336	1037	1038	0.00029405	165	166	3.58709e-05	NA	NA	NA	NA	NA
FLFSFKDI	TTCTTATTTAGCTTTAAAGATATT	WT	1426	1427	0.000383506	530	531	0.000392545	2091	2092	0.000334505	NA	NA	NA	NA	NA	NA	NA	NA	NA	925	926	0.00019684	464	465	0.000215284	141	142	0.000177701	197	198	0.000106555	131	132	6.58009e-05	12	13	1.79901e-05	3414	3415	0.000967418	210	211	4.55949e-05	NA	NA	NA	NA	NA
FLFTPFKL	TTCTTATTCACTCCATTTAAGCTC	WT	1721	1722	0.000462787	532	533	0.000394023	2554	2555	0.000408537	NA	NA	NA	NA	NA	NA	NA	NA	NA	1051	1052	0.000223624	490	491	0.000227321	161	162	0.000202729	995	996	0.000536002	547	548	0.000273173	324	325	0.000449753	1517	1518	0.000430027	1393	1394	0.000301229	NA	NA	NA	NA	NA
FLSNFSFL	TTTCTATCCAACTTCTCCTTCTTA	WT	1085	1086	0.000291862	327	328	0.000242476	1703	1704	0.000272465	NA	NA	NA	NA	NA	NA	NA	NA	NA	697	698	0.000148374	314	315	0.000145837	112	113	0.00014141	205	206	0.00011086	80	81	4.03778e-05	37	38	5.25865e-05	646	647	0.000183285	2452	2453	0.000530068	NA	NA	NA	NA	NA
FLTIFPPL	TTCTTGACTATCTTCCCACCTCTG	WT	870	871	0.000234081	326	327	0.000241737	1567	1568	0.000250719	NA	NA	NA	NA	NA	NA	NA	NA	NA	568	569	0.000120953	290	291	0.000134726	102	103	0.000128895	488	489	0.000263157	747	748	0.000372872	213	214	0.000296145	158	159	4.50423e-05	350	351	7.58474e-05	NA	NA	NA	NA	NA
FLYPAAQL	TTTCTTTACCCGGCGGCTCAACTA	WT	151	152	4.085e-05	50	51	3.7702e-05	220	221	3.53373e-05	NA	NA	NA	NA	NA	NA	NA	NA	NA	98	99	2.10445e-05	48	49	2.26858e-05	11	12	1.5017e-05	3	4	2.15262e-06	NA	1	4.98492e-07	NA	1	1.38386e-06	NA	1	2.83285e-07	NA	1	2.1609e-07	NA	NA	NA	NA	NA
FLYPWQPL	TTCCTATATCCGTGGCAACCTCTT	WT	469	470	0.000126312	230	231	0.000170768	882	883	0.000141189	NA	NA	NA	NA	NA	NA	NA	NA	NA	265	266	5.65437e-05	149	150	6.94464e-05	45	46	5.7565e-05	16	17	9.14862e-06	387	388	0.000193415	2	3	4.15157e-06	2796	2797	0.000792348	72	73	1.57745e-05	NA	NA	NA	NA	NA
FLYRKFLF	TTCCTTTATAGGAAGTTCCTTTTC	WT	541	542	0.000145662	195	196	0.000144894	826	827	0.000132235	NA	NA	NA	NA	NA	NA	NA	NA	NA	383	384	8.1627e-05	164	165	7.6391e-05	61	62	7.75876e-05	119	120	6.45785e-05	196	197	9.82028e-05	32	33	4.56672e-05	177	178	5.04247e-05	1109	1110	0.000239859	NA	NA	NA	NA	NA
FMALWAVL	TTTATGGCATTATGGGCGGTGCTT	WT	877	878	0.000235962	308	309	0.00022843	1750	1751	0.00027998	NA	NA	NA	NA	NA	NA	NA	NA	NA	556	557	0.000118402	304	305	0.000141208	70	71	8.88503e-05	144	145	7.80324e-05	54	55	2.7417e-05	145	146	0.000202043	262	263	7.45039e-05	514	515	0.000111286	NA	NA	NA	NA	NA
FMDLYSHL	TTCATGGATTTGTACTCGCACCTG	WT	597	598	0.000160712	229	230	0.000170029	1079	1080	0.000172689	NA	NA	NA	NA	NA	NA	NA	NA	NA	411	412	8.7579e-05	180	181	8.37987e-05	63	64	8.00904e-05	96	97	5.2201e-05	1641	1642	0.000818523	352	353	0.000488501	351	352	9.97163e-05	96	97	2.09607e-05	NA	NA	NA	NA	NA
FMDSYRYL	TTCATGGATTCATACAGGTATTTA	WT	8347	8348	0.00224352	3112	3113	0.0023013	13799	13800	0.00220658	NA	NA	NA	NA	NA	NA	NA	NA	NA	5419	5420	0.00115213	2498	2499	0.00115698	928	929	0.00116256	3747	3748	0.002017	4198	4199	0.00209317	7359	7360	0.0101852	30548	30549	0.00865407	12012	12013	0.00259588	NA	NA	NA	NA	NA
FMITRFFL	TTTATGATAACTCGCTTCTTTCTG	WT	1756	1757	0.000472194	557	558	0.000412505	2388	2389	0.000381994	NA	NA	NA	NA	NA	NA	NA	NA	NA	1035	1036	0.000220223	469	470	0.000217599	197	198	0.00024778	379	380	0.000204499	180	181	9.0227e-05	318	319	0.00044145	555	556	0.000157506	1094	1095	0.000236618	NA	NA	NA	NA	NA
FMLFLASL	TTCATGTTGTTTCTCGCGAGTCTA	WT	802	803	0.000215806	288	289	0.000213645	1337	1338	0.000213942	NA	NA	NA	NA	NA	NA	NA	NA	NA	555	556	0.000118189	243	244	0.000112966	99	100	0.000125141	241	242	0.000130233	127	128	6.38069e-05	223	224	0.000309984	1271	1272	0.000360338	1131	1132	0.000244613	NA	NA	NA	NA	NA
FMYAPAIL	TTTATGTACGCTCCAGCGATTCTC	WT	435	436	0.000117175	174	175	0.00012937	729	730	0.000116725	NA	NA	NA	NA	NA	NA	NA	NA	NA	317	318	6.75974e-05	124	125	5.7872e-05	54	55	6.88277e-05	529	530	0.000285222	29	30	1.49547e-05	176	177	0.000244942	43	44	1.24645e-05	279	280	6.05051e-05	NA	NA	NA	NA	NA
FMYVFYLL	TTCATGTATGTCTTCTACCTTCTG	WT	897	898	0.000241337	345	346	0.000255782	1417	1418	0.000226734	NA	NA	NA	NA	NA	NA	NA	NA	NA	531	532	0.000113087	260	261	0.000120837	109	110	0.000137655	166	167	8.98718e-05	42	43	2.14351e-05	45	46	6.36573e-05	113	114	3.22945e-05	182	183	3.95444e-05	NA	NA	NA	NA	NA
FNFGYAKA	TTTAACTTCGGGTACGCTAAGGCG	WT	48	49	1.31687e-05	17	18	1.33066e-05	147	148	2.36648e-05	NA	NA	NA	NA	NA	NA	NA	NA	NA	29	30	6.37711e-06	17	18	8.33357e-06	9	10	1.25141e-05	2	3	1.61446e-06	NA	1	4.98492e-07	NA	1	1.38386e-06	NA	1	2.83285e-07	NA	1	2.1609e-07	NA	NA	NA	NA	NA
FNISYIVV	TTTAACATCTCTTACATAGTCGTA	WT	1586	1587	0.000426506	653	654	0.000483473	2563	2564	0.000409976	NA	NA	NA	NA	NA	NA	NA	NA	NA	1057	1058	0.000224899	449	450	0.000208339	186	187	0.000234014	364	365	0.000196426	998	999	0.000497993	77	78	0.000107941	763	764	0.00021643	513	514	0.00011107	NA	NA	NA	NA	NA
FNITKAPL	TTTAATATAACAAAGGCGCCGCTC	WT	165	166	4.46125e-05	56	57	4.21376e-05	266	267	4.26925e-05	NA	NA	NA	NA	NA	NA	NA	NA	NA	124	125	2.65713e-05	47	48	2.22228e-05	12	13	1.62684e-05	1	2	1.07631e-06	12	13	6.48039e-06	2	3	4.15157e-06	NA	1	2.83285e-07	583	584	0.000126196	NA	NA	NA	NA	NA
FNLVYENL	TTTAACTTAGTATATGAAAACTTG	WT	1040	1041	0.000279769	427	428	0.000316401	1854	1855	0.000296609	NA	NA	NA	NA	NA	NA	NA	NA	NA	691	692	0.000147099	307	308	0.000142597	129	130	0.000162684	40	41	2.20643e-05	59	60	2.99095e-05	600	601	0.000831697	128	129	3.65438e-05	656	657	0.000141971	NA	NA	NA	NA	NA
FNQAFGFM	TTTAACCAAGCATTTGGGTTTATG	WT	513	514	0.000138137	171	172	0.000127152	906	907	0.000145027	NA	NA	NA	NA	NA	NA	NA	NA	NA	315	316	6.71722e-05	127	128	5.92609e-05	56	57	7.13305e-05	436	437	0.000235173	5	6	2.99095e-06	140	141	0.000195124	134	135	3.82435e-05	651	652	0.00014089	NA	NA	NA	NA	NA
FNQFMMLL	TTTAACCAATTTATGATGCTCCTG	WT	687	688	0.0001849	249	250	0.000184814	1226	1227	0.000196194	NA	NA	NA	NA	NA	NA	NA	NA	NA	486	487	0.000103522	234	235	0.000108799	97	98	0.000122638	43	44	2.36788e-05	190	191	9.52119e-05	62	63	8.71829e-05	175	176	4.98581e-05	509	510	0.000110206	NA	NA	NA	NA	NA
FNSIYALI	TTTAATTCAATCTACGCACTGATC	WT	1061	1062	0.000285412	437	438	0.000323794	1798	1799	0.000287655	NA	NA	NA	NA	NA	NA	NA	NA	NA	673	674	0.000143272	320	321	0.000148615	126	127	0.000158929	17	18	9.68678e-06	49	50	2.49246e-05	7	8	1.10708e-05	1078	1079	0.000305664	285	286	6.18016e-05	NA	NA	NA	NA	NA
FNWPYMSI	TTCAACTGGCCGTACATGAGTATC	WT	682	683	0.000183556	279	280	0.000206992	1326	1327	0.000212183	NA	NA	NA	NA	NA	NA	NA	NA	NA	540	541	0.000115001	221	222	0.000102781	74	75	9.38559e-05	660	661	0.00035572	385	386	0.000192418	85	86	0.000119012	55	56	1.5864e-05	1137	1138	0.00024591	NA	NA	NA	NA	NA
FNYGMQPL	TTCAATTACGGGATGCAGCCCCTG	WT	123	124	3.3325e-05	54	55	4.06591e-05	278	279	4.46113e-05	NA	NA	NA	NA	NA	NA	NA	NA	NA	95	96	2.04068e-05	45	46	2.12969e-05	16	17	2.1274e-05	1	2	1.07631e-06	1	2	9.96983e-07	2	3	4.15157e-06	11	12	3.39942e-06	43	44	9.50794e-06	NA	NA	NA	NA	NA
FNYILSMM	TTCAATTATATTCTGTCGATGATG	WT	1731	1732	0.000465475	709	710	0.000524872	2745	2746	0.000439077	NA	NA	NA	NA	NA	NA	NA	NA	NA	1008	1009	0.000214484	457	458	0.000212043	174	175	0.000218997	559	560	0.000301366	295	296	0.000147554	87	88	0.000121779	2332	2333	0.000660904	1100	1101	0.000237915	NA	NA	NA	NA	NA
FNYWQTEL	TTCAATTACTGGCAGACAGAACTT	WT	321	322	8.65375e-05	155	156	0.000115324	598	599	9.57784e-05	NA	NA	NA	NA	NA	NA	NA	NA	NA	193	194	4.12387e-05	108	109	5.04644e-05	31	32	4.00452e-05	17	18	9.68678e-06	2	3	1.49547e-06	3	4	5.53542e-06	3	4	1.13314e-06	5	6	1.29654e-06	NA	NA	NA	NA	NA
FPSYYLYL	TTTCCATCATATTACTTGTACTTA	WT	682	683	0.000183556	259	260	0.000192206	1031	1032	0.000165014	NA	NA	NA	NA	NA	NA	NA	NA	NA	440	441	9.37435e-05	193	194	8.98174e-05	74	75	9.38559e-05	1898	1899	0.00102196	45	46	2.29306e-05	9	10	1.38386e-05	2047	2048	0.000580168	132	133	2.87399e-05	NA	NA	NA	NA	NA
FQFLPAHL	TTTCAATTTCTACCTGCACATCTC	WT	548	549	0.000147544	166	167	0.000123456	889	890	0.000142308	NA	NA	NA	NA	NA	NA	NA	NA	NA	348	349	7.41871e-05	139	140	6.48166e-05	72	73	9.13531e-05	98	99	5.32773e-05	241	242	0.000120635	3	4	5.53542e-06	46	47	1.33144e-05	202	203	4.38662e-05	NA	NA	NA	NA	NA
FQFYSNLL	TTCCAATTCTACTCAAATCTCCTT	WT	2655	2656	0.0007138	838	839	0.000620235	3483	3484	0.000557082	NA	NA	NA	NA	NA	NA	NA	NA	NA	1500	1501	0.000319068	715	716	0.000331491	257	258	0.000322864	2116	2117	0.00113927	572	573	0.000285636	354	355	0.000491269	1882	1883	0.000533425	1435	1436	0.000310305	NA	NA	NA	NA	NA
FQFYYLPA	TTCCAGTTTTACTATCTTCCTGCG	WT	274	275	7.39062e-05	93	94	6.949e-05	510	511	8.17074e-05	NA	NA	NA	NA	NA	NA	NA	NA	NA	159	160	3.40113e-05	83	84	3.889e-05	29	30	3.75424e-05	8	9	4.84339e-06	1	2	9.96983e-07	NA	1	1.38386e-06	7	8	2.26628e-06	11	12	2.59307e-06	NA	NA	NA	NA	NA
FQICFIPI	TTTCAAATTTGTTTTATACCGATA	WT	1214	1215	0.000326531	376	377	0.000278699	1654	1655	0.00026463	NA	NA	NA	NA	NA	NA	NA	NA	NA	698	699	0.000148587	347	348	0.000161116	112	113	0.00014141	218	219	0.000117856	195	196	9.77043e-05	16	17	2.35255e-05	395	396	0.000112181	1616	1617	0.000349417	NA	NA	NA	NA	NA
FQYMQYGF	TTCCAATACATGCAATATGGCTTT	WT	2309	2310	0.000620812	875	876	0.000647588	3766	3767	0.000602332	NA	NA	NA	NA	NA	NA	NA	NA	NA	1472	1473	0.000313116	672	673	0.000311583	219	220	0.000275311	801	802	0.0004316	3889	3890	0.00193913	366	367	0.000507875	8115	8116	0.00229914	1013	1014	0.000219115	NA	NA	NA	NA	NA
FRYYLFSL	TTCAGGTATTACTTATTTAGCTTA	WT	3404	3405	0.000915094	1258	1259	0.000930723	5168	5169	0.000826508	NA	NA	NA	NA	NA	NA	NA	NA	NA	2020	2021	0.000429605	1016	1017	0.000470847	405	406	0.000508073	899	900	0.000484339	440	441	0.000219835	737	738	0.00102129	2103	2104	0.000596031	2935	2936	0.000634439	NA	NA	NA	NA	NA
FSAFCGLL	TTCTCTGCCTTCTGCGGACTACTG	WT	324	325	8.73437e-05	139	140	0.000103496	538	539	8.61845e-05	NA	NA	NA	NA	NA	NA	NA	NA	NA	238	239	5.08043e-05	102	103	4.76865e-05	43	44	5.50622e-05	1	2	1.07631e-06	54	55	2.7417e-05	1	2	2.76771e-06	2	3	8.49855e-07	25	26	5.61833e-06	NA	NA	NA	NA	NA
FSAWWARL	TTCTCGGCCTGGTGGGCACGTTTA	WT	116	117	3.14437e-05	34	35	2.58739e-05	216	217	3.46977e-05	NA	NA	NA	NA	NA	NA	NA	NA	NA	87	88	1.87062e-05	52	53	2.45377e-05	23	24	3.00339e-05	29	30	1.61446e-05	NA	1	4.98492e-07	1	2	2.76771e-06	635	636	0.000180169	9	10	2.1609e-06	NA	NA	NA	NA	NA
FSAYWSGV	TTCTCTGCGTATTGGTCTGGTGTA	WT	1138	1139	0.000306106	408	409	0.000302356	1964	1965	0.000314198	NA	NA	NA	NA	NA	NA	NA	NA	NA	725	726	0.000154326	276	277	0.000128244	128	129	0.000161432	109	110	5.9197e-05	832	833	0.000415243	16	17	2.35255e-05	382	383	0.000108498	380	381	8.23301e-05	NA	NA	NA	NA	NA
FSFDFFGG	TTCAGCTTCGATTTCTTCGGAGGA	WT	474	475	0.000127656	171	172	0.000127152	934	935	0.000149504	NA	NA	NA	NA	NA	NA	NA	NA	NA	303	304	6.46214e-05	150	151	6.99094e-05	52	53	6.63249e-05	11	12	6.45785e-06	16	17	8.47436e-06	52	53	7.33443e-05	162	163	4.61754e-05	389	390	8.42749e-05	NA	NA	NA	NA	NA
FSFHLAAV	TTTTCTTTCCACCTTGCGGCCGTA	WT	210	211	5.67062e-05	49	50	3.69628e-05	355	356	5.69234e-05	NA	NA	NA	NA	NA	NA	NA	NA	NA	127	128	2.7209e-05	45	46	2.12969e-05	20	21	2.62797e-05	425	426	0.000229254	5	6	2.99095e-06	3	4	5.53542e-06	2	3	8.49855e-07	27	28	6.05051e-06	NA	NA	NA	NA	NA
FSFISEPM	TTCTCTTTCATTAGCGAACCCATG	WT	735	736	0.0001978	258	259	0.000191467	1061	1062	0.000169811	NA	NA	NA	NA	NA	NA	NA	NA	NA	468	469	9.96955e-05	187	188	8.70395e-05	75	76	9.51074e-05	55	56	3.01366e-05	1204	1205	0.000600682	142	143	0.000197891	31	32	9.06512e-06	161	162	3.50065e-05	NA	NA	NA	NA	NA
FSFLFNLT	TTTTCTTTCCTGTTCAATCTTACG	WT	1516	1517	0.000407694	477	478	0.000353364	2160	2161	0.000345538	NA	NA	NA	NA	NA	NA	NA	NA	NA	949	950	0.000201942	437	438	0.000202784	175	176	0.000220249	187	188	0.000101173	324	325	0.00016201	887	888	0.00122886	375	376	0.000106515	6028	6029	0.0013028	NA	NA	NA	NA	NA
FSFLPLNL	TTTTCCTTCCTACCTTTAAATTTA	WT	1577	1578	0.000424087	528	529	0.000391066	2321	2322	0.000371281	NA	NA	NA	NA	NA	NA	NA	NA	NA	923	924	0.000196415	506	507	0.000234729	153	154	0.000192718	617	618	0.000332579	258	259	0.000129109	130	131	0.000181285	483	484	0.00013711	241	242	5.22937e-05	NA	NA	NA	NA	NA
FSFLSQSI	TTTTCCTTCTTGTCTCAAAGTATA	WT	927	928	0.0002494	330	331	0.000244694	1315	1316	0.000210425	NA	NA	NA	NA	NA	NA	NA	NA	NA	548	549	0.000116701	242	243	0.000112503	94	95	0.000118884	120	121	6.51167e-05	1774	1775	0.000884823	6	7	9.68699e-06	209	210	5.94898e-05	270	271	5.85603e-05	NA	NA	NA	NA	NA
FSFMVSTL	TTTAGTTTCATGGTATCGACTCTA	WT	795	796	0.000213925	311	312	0.000230648	1395	1396	0.000223216	NA	NA	NA	NA	NA	NA	NA	NA	NA	493	494	0.00010501	261	262	0.0001213	102	103	0.000128895	985	986	0.00053062	471	472	0.000235288	20	21	2.9061e-05	220	221	6.2606e-05	236	237	5.12132e-05	NA	NA	NA	NA	NA
FSFPKASF	TTTTCTTTTCCGAAAGCTAGCTTC	WT	471	472	0.00012685	164	165	0.000121977	777	778	0.0001244	NA	NA	NA	NA	NA	NA	NA	NA	NA	320	321	6.82351e-05	163	164	7.59281e-05	49	50	6.25706e-05	57	58	3.1213e-05	34	35	1.74472e-05	NA	1	1.38386e-06	10986	10987	0.00311245	217	218	4.71075e-05	NA	NA	NA	NA	NA
FSFTWSSS	TTTTCATTCACCTGGTCGTCGTCA	WT	1317	1318	0.000354212	495	496	0.000366671	2061	2062	0.000329708	NA	NA	NA	NA	NA	NA	NA	NA	NA	875	876	0.000186212	433	434	0.000200932	147	148	0.000185209	1237	1238	0.000666235	1469	1470	0.000732783	469	470	0.000650412	517	518	0.000146742	1180	1181	0.000255202	NA	NA	NA	NA	NA
FSFVFGAL	TTCTCGTTTGTATTCGGTGCCTTG	WT	737	738	0.000198337	234	235	0.000173725	1253	1254	0.000200511	NA	NA	NA	NA	NA	NA	NA	NA	NA	437	438	9.31058e-05	194	195	9.02803e-05	76	77	9.63588e-05	94	95	5.11247e-05	285	286	0.000142569	54	55	7.6112e-05	84	85	2.40792e-05	134	135	2.91721e-05	NA	NA	NA	NA	NA
FSFVQSTL	TTCAGCTTCGTCCAATCAACGTTG	WT	385	386	0.000103737	125	126	9.31462e-05	657	658	0.000105212	NA	NA	NA	NA	NA	NA	NA	NA	NA	175	176	3.74124e-05	96	97	4.49087e-05	39	40	5.00565e-05	201	202	0.000108707	4	5	2.49246e-06	1	2	2.76771e-06	821	822	0.00023286	6	7	1.51263e-06	NA	NA	NA	NA	NA
FSGRYFHI	TTCAGTGGGAGGTACTTTCACATA	WT	405	406	0.000109112	142	143	0.000105714	655	656	0.000104892	NA	NA	NA	NA	NA	NA	NA	NA	NA	246	247	5.25049e-05	105	106	4.90755e-05	45	46	5.7565e-05	18	19	1.02249e-05	919	920	0.000458612	3	4	5.53542e-06	5	6	1.69971e-06	53	54	1.16688e-05	NA	NA	NA	NA	NA
FSGVYKKL	TTTTCAGGAGTCTATAAGAAGCTA	WT	378	379	0.000101856	127	128	9.46247e-05	728	729	0.000116565	NA	NA	NA	NA	NA	NA	NA	NA	NA	291	292	6.20706e-05	112	113	5.23163e-05	36	37	4.63023e-05	94	95	5.11247e-05	582	583	0.000290621	3	4	5.53542e-06	492	493	0.000139659	143	144	3.11169e-05	NA	NA	NA	NA	NA
FSIMGVNL	TTCTCTATCATGGGAGTAAACCTG	WT	859	860	0.000231125	375	376	0.00027796	1486	1487	0.000237767	NA	NA	NA	NA	NA	NA	NA	NA	NA	503	504	0.000107135	232	233	0.000107873	94	95	0.000118884	205	206	0.00011086	24	25	1.24623e-05	192	193	0.000267084	11	12	3.39942e-06	325	326	7.04452e-05	NA	NA	NA	NA	NA
FSIPHAFL	TTTTCGATTCCTCACGCGTTTCTG	WT	NA	1	2.6875e-07	NA	1	7.39256e-07	NA	1	1.59897e-07	NA	NA	NA	NA	NA	NA	NA	NA	NA	NA	1	2.1257e-07	NA	1	4.62976e-07	NA	1	1.25141e-06	NA	1	5.38154e-07	NA	1	4.98492e-07	NA	1	1.38386e-06	NA	1	2.83285e-07	NA	1	2.1609e-07	NA	NA	NA	NA	NA
FSIRYHDM	TTTTCAATTCGGTATCACGACATG	WT	481	482	0.000129537	172	173	0.000127891	878	879	0.00014055	NA	NA	NA	NA	NA	NA	NA	NA	NA	313	314	6.67471e-05	160	161	7.45391e-05	69	70	8.75989e-05	236	237	0.000127543	16	17	8.47436e-06	3	4	5.53542e-06	31	32	9.06512e-06	3631	3632	0.000784837	NA	NA	NA	NA	NA
FSLFMAAL	TTTTCATTATTCATGGCCGCCCTG	WT	350	351	9.43312e-05	112	113	8.35359e-05	572	573	9.1621e-05	NA	NA	NA	NA	NA	NA	NA	NA	NA	214	215	4.57026e-05	86	87	4.02789e-05	37	38	4.75537e-05	34	35	1.88354e-05	113	114	5.6828e-05	2	3	4.15157e-06	69	70	1.98299e-05	19	20	4.32179e-06	NA	NA	NA	NA	NA
FSLIFKLI	TTCAGTCTCATTTTCAAGCTTATA	WT	979	980	0.000263375	352	353	0.000260957	1595	1596	0.000255196	NA	NA	NA	NA	NA	NA	NA	NA	NA	604	605	0.000128605	308	309	0.00014306	121	122	0.000152672	130	131	7.04982e-05	1585	1586	0.000790608	25	26	3.59802e-05	721	722	0.000204532	1378	1379	0.000297987	NA	NA	NA	NA	NA
FSLLFPAV	TTCTCCCTTTTGTTCCCAGCGGTG	WT	425	426	0.000114487	215	216	0.000159679	775	776	0.00012408	NA	NA	NA	NA	NA	NA	NA	NA	NA	301	302	6.41963e-05	174	175	8.10208e-05	68	69	8.63475e-05	5	6	3.22893e-06	68	69	3.43959e-05	33	34	4.70511e-05	257	258	7.30875e-05	3079	3080	0.000665556	NA	NA	NA	NA	NA
FSLNMYEM	TTTTCGTTGAATATGTATGAAATG	WT	289	290	7.79375e-05	91	92	6.80115e-05	443	444	7.09943e-05	NA	NA	NA	NA	NA	NA	NA	NA	NA	142	143	3.03976e-05	70	71	3.28713e-05	24	25	3.12853e-05	107	108	5.81207e-05	9	10	4.98492e-06	5	6	8.30313e-06	NA	1	2.83285e-07	16	17	3.67352e-06	NA	NA	NA	NA	NA
FSLVMCLL	TTTTCCCTAGTGATGTGTCTGCTC	WT	542	543	0.000145931	211	212	0.000156722	903	904	0.000144547	NA	NA	NA	NA	NA	NA	NA	NA	NA	331	332	7.05734e-05	157	158	7.31502e-05	63	64	8.00904e-05	83	84	4.5205e-05	866	867	0.000432192	200	201	0.000278155	24	25	7.08212e-06	72	73	1.57745e-05	NA	NA	NA	NA	NA
FSMCFGFV	TTTTCAATGTGTTTCGGTTTTGTT	WT	700	701	0.000188394	201	202	0.00014933	1100	1101	0.000176047	NA	NA	NA	NA	NA	NA	NA	NA	NA	355	356	7.56751e-05	225	226	0.000104633	60	61	7.63362e-05	341	342	0.000184049	699	700	0.000348944	22	23	3.18287e-05	54	55	1.55807e-05	461	462	9.98334e-05	NA	NA	NA	NA	NA
FSMYVAPL	TTTAGTATGTACGTTGCACCATTA	WT	165	166	4.46125e-05	87	88	6.50545e-05	315	316	5.05275e-05	NA	NA	NA	NA	NA	NA	NA	NA	NA	121	122	2.59336e-05	40	41	1.8982e-05	17	18	2.25254e-05	52	53	2.85222e-05	7	8	3.98793e-06	3	4	5.53542e-06	42	43	1.21813e-05	10	11	2.37698e-06	NA	NA	NA	NA	NA
FSPHFHNF	TTCTCACCACATTTTCACAATTTT	WT	723	724	0.000194575	253	254	0.000187771	1255	1256	0.000200831	NA	NA	NA	NA	NA	NA	NA	NA	NA	535	536	0.000113938	244	245	0.000113429	85	86	0.000107621	227	228	0.000122699	59	60	2.99095e-05	21	22	3.04448e-05	200	201	5.69403e-05	1319	1320	0.000285238	NA	NA	NA	NA	NA
FSPKFQAL	TTCTCACCCAAGTTCCAAGCATTA	WT	321	322	8.65375e-05	140	141	0.000104235	490	491	7.85095e-05	NA	NA	NA	NA	NA	NA	NA	NA	NA	260	261	5.54809e-05	88	89	4.12049e-05	51	52	6.50735e-05	4	5	2.69077e-06	7	8	3.98793e-06	NA	1	1.38386e-06	616	617	0.000174787	137	138	2.98204e-05	NA	NA	NA	NA	NA
FSPPFLEL	TTCTCTCCGCCATTCCTAGAACTA	WT	566	567	0.000152381	175	176	0.000130109	886	887	0.000141829	NA	NA	NA	NA	NA	NA	NA	NA	NA	386	387	8.22647e-05	134	135	6.25018e-05	47	48	6.00678e-05	402	403	0.000216876	26	27	1.34593e-05	27	28	3.87479e-05	18	19	5.38241e-06	20	21	4.53788e-06	NA	NA	NA	NA	NA
FSPPHSSL	TTCTCACCGCCCCATTCCAGTTTG	WT	562	563	0.000151306	167	168	0.000124195	931	932	0.000149024	NA	NA	NA	NA	NA	NA	NA	NA	NA	308	309	6.56843e-05	148	149	6.89834e-05	64	65	8.13418e-05	43	44	2.36788e-05	33	34	1.69487e-05	1	2	2.76771e-06	4	5	1.41642e-06	135	136	2.93882e-05	NA	NA	NA	NA	NA
FSPSFPSL	TTTTCTCCGAGTTTCCCTTCCTTG	WT	603	604	0.000162325	220	221	0.000163376	979	980	0.000156699	NA	NA	NA	NA	NA	NA	NA	NA	NA	393	394	8.37527e-05	154	155	7.17613e-05	74	75	9.38559e-05	395	396	0.000213109	51	52	2.59216e-05	67	68	9.41021e-05	1186	1187	0.000336259	2355	2356	0.000509107	NA	NA	NA	NA	NA
FSSLFPYV	TTCTCTTCCCTATTCCCCTATGTA	WT	560	561	0.000150769	195	196	0.000144894	910	911	0.000145666	NA	NA	NA	NA	NA	NA	NA	NA	NA	330	331	7.03608e-05	161	162	7.50021e-05	56	57	7.13305e-05	45	46	2.47551e-05	47	48	2.39276e-05	117	118	0.000163295	636	637	0.000180452	1065	1066	0.000230351	NA	NA	NA	NA	NA
FSSPYEHL	TTCAGTAGCCCCTACGAGCATCTG	WT	117	118	3.17125e-05	51	52	3.84413e-05	180	181	2.89414e-05	NA	NA	NA	NA	NA	NA	NA	NA	NA	84	85	1.80685e-05	25	26	1.20374e-05	7	8	1.00113e-05	114	115	6.18877e-05	2	3	1.49547e-06	7	8	1.10708e-05	4	5	1.41642e-06	10	11	2.37698e-06	NA	NA	NA	NA	NA
FSVFYQYL	TTCTCCGTGTTCTATCAATATTTA	WT	927	928	0.0002494	367	368	0.000272046	1642	1643	0.000262711	NA	NA	NA	NA	NA	NA	NA	NA	NA	592	593	0.000126054	329	330	0.000152782	97	98	0.000122638	706	707	0.000380475	30	31	1.54532e-05	206	207	0.000286458	582	583	0.000165155	874	875	0.000189078	NA	NA	NA	NA	NA
FSVFYTLM	TTTTCCGTGTTTTATACACTTATG	WT	387	388	0.000104275	136	137	0.000101278	712	713	0.000114007	NA	NA	NA	NA	NA	NA	NA	NA	NA	238	239	5.08043e-05	101	102	4.72236e-05	35	36	4.50509e-05	94	95	5.11247e-05	185	186	9.27194e-05	2	3	4.15157e-06	1796	1797	0.000509063	127	128	2.76595e-05	NA	NA	NA	NA	NA
FSVVLAGL	TTTTCGGTGGTGCTAGCTGGACTT	WT	302	303	8.14312e-05	107	108	7.98396e-05	502	503	8.04282e-05	NA	NA	NA	NA	NA	NA	NA	NA	NA	155	156	3.3161e-05	92	93	4.30568e-05	26	27	3.37881e-05	7	8	4.30523e-06	107	108	5.38371e-05	NA	1	1.38386e-06	8	9	2.54956e-06	164	165	3.56548e-05	NA	NA	NA	NA	NA
FSVVYTFV	TTTTCAGTGGTGTACACATTCGTA	WT	315	316	8.4925e-05	85	86	6.3576e-05	605	606	9.68976e-05	NA	NA	NA	NA	NA	NA	NA	NA	NA	212	213	4.52775e-05	92	93	4.30568e-05	33	34	4.2548e-05	79	80	4.30523e-05	2	3	1.49547e-06	2	3	4.15157e-06	NA	1	2.83285e-07	6	7	1.51263e-06	NA	NA	NA	NA	NA
FSYCVGNV	TTTTCCTACTGCGTAGGCAACGTT	WT	503	504	0.00013545	156	157	0.000116063	1070	1071	0.00017125	NA	NA	NA	NA	NA	NA	NA	NA	NA	281	282	5.99449e-05	130	131	6.06499e-05	58	59	7.38333e-05	58	59	3.17511e-05	66	67	3.33989e-05	7	8	1.10708e-05	275	276	7.81866e-05	151	152	3.28456e-05	NA	NA	NA	NA	NA
FSYISFAL	TTTTCCTACATAAGTTTTGCCCTC	WT	235	236	6.3425e-05	94	95	7.02293e-05	406	407	6.50781e-05	NA	NA	NA	NA	NA	NA	NA	NA	NA	140	141	2.99724e-05	70	71	3.28713e-05	19	20	2.50283e-05	113	114	6.13496e-05	403	404	0.000201391	25	26	3.59802e-05	2889	2890	0.000818693	140	141	3.04686e-05	NA	NA	NA	NA	NA
FSYKKMTI	TTCTCATATAAGAAGATGACGATA	WT	197	198	5.32125e-05	71	72	5.32264e-05	297	298	4.76493e-05	NA	NA	NA	NA	NA	NA	NA	NA	NA	119	120	2.55084e-05	53	54	2.50007e-05	19	20	2.50283e-05	NA	1	5.38154e-07	39	40	1.99397e-05	106	107	0.000148072	3	4	1.13314e-06	44	45	9.72403e-06	NA	NA	NA	NA	NA
FSYNNKQL	TTCTCATACAACAACAAACAACTG	WT	504	505	0.000135719	210	211	0.000155983	829	830	0.000132715	NA	NA	NA	NA	NA	NA	NA	NA	NA	301	302	6.41963e-05	144	145	6.71315e-05	48	49	6.13192e-05	47	48	2.58314e-05	89	90	4.48642e-05	17	18	2.49094e-05	110	111	3.14446e-05	608	609	0.000131599	NA	NA	NA	NA	NA
FSYRIPNL	TTCAGCTATCGCATACCCAATCTT	WT	298	299	8.03562e-05	128	129	9.5364e-05	503	504	8.05881e-05	NA	NA	NA	NA	NA	NA	NA	NA	NA	181	182	3.86878e-05	109	110	5.09274e-05	29	30	3.75424e-05	2	3	1.61446e-06	25	26	1.29608e-05	56	57	7.88797e-05	481	482	0.000136543	39	40	8.64358e-06	NA	NA	NA	NA	NA
FSYSLGAI	TTTAGTTATAGTTTAGGGGCCATT	WT	821	822	0.000220912	357	358	0.000264654	1227	1228	0.000196354	NA	NA	NA	NA	NA	NA	NA	NA	NA	509	510	0.000108411	232	233	0.000107873	85	86	0.000107621	65	66	3.55182e-05	937	938	0.000467585	676	677	0.00093687	179	180	5.09913e-05	3770	3771	0.000814874	NA	NA	NA	NA	NA
FSYVGFPV	TTTAGTTATGTGGGATTCCCTGTT	WT	1443	1444	0.000388075	591	592	0.000437639	2519	2520	0.000402941	NA	NA	NA	NA	NA	NA	NA	NA	NA	936	937	0.000199178	406	407	0.000188431	164	165	0.000206483	407	408	0.000219567	1376	1377	0.000686423	20	21	2.9061e-05	354	355	0.000100566	1101	1102	0.000238131	NA	NA	NA	NA	NA
FTATWAAM	TTTACAGCAACTTGGGCCGCTATG	WT	129	130	3.49375e-05	39	40	2.95702e-05	209	210	3.35784e-05	NA	NA	NA	NA	NA	NA	NA	NA	NA	87	88	1.87062e-05	29	30	1.38893e-05	12	13	1.62684e-05	1	2	1.07631e-06	13	14	6.97888e-06	NA	1	1.38386e-06	NA	1	2.83285e-07	152	153	3.30617e-05	NA	NA	NA	NA	NA
FTFFLSLF	TTTACATTCTTCCTCTCACTTTTC	WT	1741	1742	0.000468162	613	614	0.000453903	2534	2535	0.000405339	NA	NA	NA	NA	NA	NA	NA	NA	NA	1095	1096	0.000232977	578	579	0.000268063	174	175	0.000218997	1437	1438	0.000773866	331	332	0.000165499	489	490	0.000678089	5288	5289	0.00149829	4086	4087	0.000883158	NA	NA	NA	NA	NA
FTFMESGV	TTTACTTTTATGGAGAGTGGCGTT	WT	218	219	5.88562e-05	81	82	6.0619e-05	419	420	6.71568e-05	NA	NA	NA	NA	NA	NA	NA	NA	NA	136	137	2.91221e-05	62	63	2.91675e-05	23	24	3.00339e-05	NA	1	5.38154e-07	93	94	4.68582e-05	2	3	4.15157e-06	154	155	4.39092e-05	13	14	3.02525e-06	NA	NA	NA	NA	NA
FTFSLLHL	TTCACCTTCAGCTTGCTACACCTG	WT	66	67	1.80062e-05	25	26	1.92206e-05	121	122	1.95074e-05	NA	NA	NA	NA	NA	NA	NA	NA	NA	60	61	1.29668e-05	20	21	9.7225e-06	12	13	1.62684e-05	6	7	3.76708e-06	1	2	9.96983e-07	NA	1	1.38386e-06	2	3	8.49855e-07	NA	1	2.1609e-07	NA	NA	NA	NA	NA
FTFSLLLL	TTTACGTTCAGCCTACTTCTCTTA	WT	828	829	0.000222794	292	293	0.000216602	1358	1359	0.0002173	NA	NA	NA	NA	NA	NA	NA	NA	NA	475	476	0.000101184	246	247	0.000114355	96	97	0.000121387	187	188	0.000101173	150	151	7.52722e-05	254	255	0.000352883	94	95	2.69121e-05	517	518	0.000111934	NA	NA	NA	NA	NA
FTFSYKKA	TTCACGTTCTCTTACAAGAAGGCT	WT	185	186	4.99875e-05	71	72	5.32264e-05	364	365	5.83624e-05	NA	NA	NA	NA	NA	NA	NA	NA	NA	108	109	2.31702e-05	61	62	2.87045e-05	27	28	3.50396e-05	14	15	8.07232e-06	9	10	4.98492e-06	NA	1	1.38386e-06	NA	1	2.83285e-07	6	7	1.51263e-06	NA	NA	NA	NA	NA
FTFTDYYM	TTCACGTTTACAGACTATTATATG	WT	736	737	0.000198069	323	324	0.000239519	1279	1280	0.000204668	NA	NA	NA	NA	NA	NA	NA	NA	NA	470	471	0.000100121	208	209	9.6762e-05	84	85	0.00010637	272	273	0.000146916	195	196	9.77043e-05	4	5	6.91928e-06	50	51	1.44475e-05	221	222	4.79719e-05	NA	NA	NA	NA	NA
FTFVCMAL	TTTACCTTTGTCTGTATGGCGTTA	WT	616	617	0.000165819	198	199	0.000147112	780	781	0.00012488	NA	NA	NA	NA	NA	NA	NA	NA	NA	366	367	7.80133e-05	142	143	6.62056e-05	74	75	9.38559e-05	210	211	0.000113551	143	144	7.17828e-05	7	8	1.10708e-05	1777	1778	0.000503681	28	29	6.2666e-06	NA	NA	NA	NA	NA
FTFVIPAL	TTCACATTTGTTATTCCCGCGCTC	WT	615	616	0.00016555	219	220	0.000162636	991	992	0.000158618	NA	NA	NA	NA	NA	NA	NA	NA	NA	366	367	7.80133e-05	166	167	7.7317e-05	51	52	6.50735e-05	331	332	0.000178667	181	182	9.07255e-05	12	13	1.79901e-05	34	35	9.91497e-06	490	491	0.0001061	NA	NA	NA	NA	NA
FTIVYAGA	TTCACGATTGTATATGCGGGTGCA	WT	343	344	9.245e-05	119	120	8.87107e-05	686	687	0.000109849	NA	NA	NA	NA	NA	NA	NA	NA	NA	235	236	5.01666e-05	70	71	3.28713e-05	39	40	5.00565e-05	5	6	3.22893e-06	3	4	1.99397e-06	NA	1	1.38386e-06	260	261	7.39374e-05	19	20	4.32179e-06	NA	NA	NA	NA	NA
FTKDFAPV	TTCACAAAGGATTTTGCTCCGGTC	WT	210	211	5.67062e-05	100	101	7.46648e-05	445	446	7.13141e-05	NA	NA	NA	NA	NA	NA	NA	NA	NA	139	140	2.97599e-05	65	66	3.05564e-05	28	29	3.6291e-05	55	56	3.01366e-05	NA	1	4.98492e-07	1	2	2.76771e-06	175	176	4.98581e-05	34	35	7.56313e-06	NA	NA	NA	NA	NA
FTLLLLPL	TTTACCCTGTTGTTACTGCCATTG	WT	898	899	0.000241606	320	321	0.000237301	1880	1881	0.000300766	NA	NA	NA	NA	NA	NA	NA	NA	NA	606	607	0.00012903	305	306	0.000141671	123	124	0.000155175	39	40	2.15262e-05	90	91	4.53627e-05	16	17	2.35255e-05	54	55	1.55807e-05	6312	6313	0.00136417	NA	NA	NA	NA	NA
FTLVFARL	TTCACACTGGTATTTGCCCGTCTT	WT	483	484	0.000130075	176	177	0.000130848	788	789	0.000126159	NA	NA	NA	NA	NA	NA	NA	NA	NA	314	315	6.69597e-05	124	125	5.7872e-05	54	55	6.88277e-05	455	456	0.000245398	12	13	6.48039e-06	424	425	0.000588138	1757	1758	0.000498015	45	46	9.94012e-06	NA	NA	NA	NA	NA
FTMRYSLI	TTCACCATGAGGTACTCGCTGATT	WT	432	433	0.000116369	168	169	0.000124934	904	905	0.000144707	NA	NA	NA	NA	NA	NA	NA	NA	NA	265	266	5.65437e-05	140	141	6.52796e-05	44	45	5.63136e-05	9	10	5.38154e-06	12	13	6.48039e-06	374	375	0.000518946	456	457	0.000129461	155	156	3.371e-05	NA	NA	NA	NA	NA
FTTSYREL	TTCACAACATCTTATAGGGAGCTA	WT	851	852	0.000228975	302	303	0.000223994	1194	1195	0.000191077	NA	NA	NA	NA	NA	NA	NA	NA	NA	513	514	0.000109261	185	186	8.61135e-05	81	82	0.000102616	815	816	0.000439134	216	217	0.000108173	566	567	0.000784646	440	441	0.000124929	449	450	9.72403e-05	NA	NA	NA	NA	NA
FTVLFAIV	TTCACAGTCCTCTTCGCAATTGTG	WT	139	140	3.7625e-05	45	46	3.40058e-05	246	247	3.94946e-05	NA	NA	NA	NA	NA	NA	NA	NA	NA	71	72	1.53051e-05	31	32	1.48152e-05	16	17	2.1274e-05	NA	1	5.38154e-07	NA	1	4.98492e-07	1	2	2.76771e-06	7	8	2.26628e-06	3	4	8.64358e-07	NA	NA	NA	NA	NA
FTYAKYIV	TTTACATATGCAAAGTATATCGTC	WT	344	345	9.27187e-05	143	144	0.000106453	709	710	0.000113527	NA	NA	NA	NA	NA	NA	NA	NA	NA	224	225	4.78283e-05	91	92	4.25938e-05	40	41	5.13079e-05	5	6	3.22893e-06	61	62	3.09065e-05	NA	1	1.38386e-06	25	26	7.36541e-06	2113	2114	0.000456813	NA	NA	NA	NA	NA
FTYLKKSM	TTTACATATCTCAAGAAAAGCATG	WT	1178	1179	0.000316856	477	478	0.000353364	1973	1974	0.000315637	NA	NA	NA	NA	NA	NA	NA	NA	NA	747	748	0.000159003	329	330	0.000152782	140	141	0.000176449	183	184	9.90204e-05	1068	1069	0.000532887	2844	2845	0.00393707	425	426	0.000120679	484	485	0.000104803	NA	NA	NA	NA	NA
FTYRGVDL	TTTACGTACAGAGGAGTCGACCTC	WT	511	512	0.0001376	171	172	0.000127152	815	816	0.000130476	NA	NA	NA	NA	NA	NA	NA	NA	NA	233	234	4.97415e-05	128	129	5.97239e-05	42	43	5.38107e-05	1010	1011	0.000544074	228	229	0.000114155	213	214	0.000296145	79	80	2.26628e-05	289	290	6.2666e-05	NA	NA	NA	NA	NA
FTYVNEKL	TTCACGTATGTGAATGAAAAGTTG	WT	494	495	0.000133031	147	148	0.00010941	803	804	0.000128557	NA	NA	NA	NA	NA	NA	NA	NA	NA	305	306	6.50465e-05	125	126	5.8335e-05	42	43	5.38107e-05	10	11	5.9197e-06	33	34	1.69487e-05	37	38	5.25865e-05	3	4	1.13314e-06	12	13	2.80916e-06	NA	NA	NA	NA	NA
FTYWLTFV	TTTACCTATTGGTTAACCTTCGTT	WT	657	658	0.000176837	270	271	0.000200338	1206	1207	0.000192996	NA	NA	NA	NA	NA	NA	NA	NA	NA	431	432	9.18304e-05	199	200	9.25952e-05	66	67	8.38446e-05	79	80	4.30523e-05	446	447	0.000222826	153	154	0.000213114	18	19	5.38241e-06	47	48	1.03723e-05	NA	NA	NA	NA	NA
FVAEHSNL	TTTGTTGCCGAGCACAGCAATTTA	WT	401	402	0.000108037	133	134	9.90603e-05	596	597	9.54586e-05	NA	NA	NA	NA	NA	NA	NA	NA	NA	225	226	4.80409e-05	87	88	4.07419e-05	46	47	5.88164e-05	8	9	4.84339e-06	11	12	5.9819e-06	6	7	9.68699e-06	4	5	1.41642e-06	1	2	4.32179e-07	NA	NA	NA	NA	NA
FVAFHPPL	TTCGTCGCTTTTCATCCACCTCTG	WT	293	294	7.90125e-05	132	133	9.8321e-05	583	584	9.33799e-05	NA	NA	NA	NA	NA	NA	NA	NA	NA	199	200	4.25141e-05	102	103	4.76865e-05	34	35	4.37994e-05	36	37	1.99117e-05	7	8	3.98793e-06	110	111	0.000153608	287	288	8.15861e-05	10	11	2.37698e-06	NA	NA	NA	NA	NA
FVALFTLL	TTCGTGGCCTTGTTTACCTTGCTG	WT	303	304	8.17e-05	107	108	7.98396e-05	525	526	8.41059e-05	NA	NA	NA	NA	NA	NA	NA	NA	NA	235	236	5.01666e-05	86	87	4.02789e-05	33	34	4.2548e-05	3	4	2.15262e-06	379	380	0.000189427	44	45	6.22735e-05	448	449	0.000127195	229	230	4.97006e-05	NA	NA	NA	NA	NA
FVASYQEL	TTCGTGGCATCCTACCAGGAACTC	WT	933	934	0.000251012	344	345	0.000255043	1515	1516	0.000242404	NA	NA	NA	NA	NA	NA	NA	NA	NA	552	553	0.000117551	235	236	0.000109262	112	113	0.00014141	113	114	6.13496e-05	28	29	1.44563e-05	945	946	0.00130913	1120	1121	0.000317562	9129	9130	0.0019729	NA	NA	NA	NA	NA
FVAYFLPV	TTCGTTGCTTACTTCCTGCCTGTA	WT	581	582	0.000156412	190	191	0.000141198	1067	1068	0.00017077	NA	NA	NA	NA	NA	NA	NA	NA	NA	386	387	8.22647e-05	153	154	7.12983e-05	60	61	7.63362e-05	509	510	0.000274459	143	144	7.17828e-05	85	86	0.000119012	398	399	0.000113031	121	122	2.63629e-05	NA	NA	NA	NA	NA
FVDMFSVL	TTTGTCGACATGTTTTCAGTACTC	WT	1617	1618	0.000434837	532	533	0.000394023	2748	2749	0.000439557	NA	NA	NA	NA	NA	NA	NA	NA	NA	1080	1081	0.000229789	492	493	0.000228247	183	184	0.00023026	796	797	0.000428909	950	951	0.000474065	601	602	0.000833081	599	600	0.000169971	548	549	0.000118633	NA	NA	NA	NA	NA
FVFLRTMV	TTTGTTTTCCTCCGGACCATGGTA	WT	443	444	0.000119325	152	153	0.000113106	675	676	0.00010809	NA	NA	NA	NA	NA	NA	NA	NA	NA	263	264	5.61186e-05	121	122	5.64831e-05	40	41	5.13079e-05	295	296	0.000159294	24	25	1.24623e-05	2	3	4.15157e-06	48	49	1.3881e-05	349	350	7.56313e-05	NA	NA	NA	NA	NA
FVFSHLAL	TTTGTATTCTCGCATCTAGCACTG	WT	612	613	0.000164744	201	202	0.00014933	926	927	0.000148225	NA	NA	NA	NA	NA	NA	NA	NA	NA	360	361	7.67379e-05	197	198	9.16693e-05	79	80	0.000100113	190	191	0.000102787	272	273	0.000136088	491	492	0.000680857	49	50	1.41642e-05	200	201	4.3434e-05	NA	NA	NA	NA	NA
FVFSRRRV	TTTGTATTCAGCCGCAGGCGGGTC	WT	427	428	0.000115025	168	169	0.000124934	824	825	0.000131915	NA	NA	NA	NA	NA	NA	NA	NA	NA	259	260	5.52683e-05	121	122	5.64831e-05	51	52	6.50735e-05	161	162	8.7181e-05	255	256	0.000127614	44	45	6.22735e-05	97	98	2.77619e-05	5	6	1.29654e-06	NA	NA	NA	NA	NA
FVFTYLRS	TTCGTCTTCACCTACCTGAGAAGT	WT	217	218	5.85875e-05	86	87	6.43152e-05	421	422	6.74766e-05	NA	NA	NA	NA	NA	NA	NA	NA	NA	162	163	3.4649e-05	77	78	3.61121e-05	34	35	4.37994e-05	69	70	3.76708e-05	20	21	1.04683e-05	28	29	4.01318e-05	26	27	7.64869e-06	16	17	3.67352e-06	NA	NA	NA	NA	NA
FVFVSINL	TTCGTGTTCGTAAGTATCAATCTA	WT	2807	2808	0.00075465	1097	1098	0.000811703	4821	4822	0.000771024	NA	NA	NA	NA	NA	NA	NA	NA	NA	1709	1710	0.000363495	820	821	0.000380103	339	340	0.00042548	417	418	0.000224949	277	278	0.000138581	287	288	0.00039855	1573	1574	0.00044589	6877	6878	0.00148626	NA	NA	NA	NA	NA
FVFWPFSL	TTTGTATTCTGGCCCTTTTCGCTT	WT	1173	1174	0.000315512	293	294	0.000217341	1506	1507	0.000240965	NA	NA	NA	NA	NA	NA	NA	NA	NA	568	569	0.000120953	321	322	0.000149078	103	104	0.000130147	234	235	0.000126466	307	308	0.000153535	154	155	0.000214498	215	216	6.11895e-05	2111	2112	0.000456381	NA	NA	NA	NA	NA
FVGWYNGL	TTCGTCGGATGGTATAACGGCTTG	WT	217	218	5.85875e-05	49	50	3.69628e-05	320	321	5.1327e-05	NA	NA	NA	NA	NA	NA	NA	NA	NA	144	145	3.08227e-05	62	63	2.91675e-05	21	22	2.75311e-05	143	144	7.74942e-05	1	2	9.96983e-07	NA	1	1.38386e-06	47	48	1.35977e-05	31	32	6.91486e-06	NA	NA	NA	NA	NA
FVHNFSRI	TTTGTCCATAACTTCAGTAGAATA	WT	336	337	9.05687e-05	146	147	0.000108671	675	676	0.00010809	NA	NA	NA	NA	NA	NA	NA	NA	NA	270	271	5.76066e-05	114	115	5.32422e-05	32	33	4.12966e-05	17	18	9.68678e-06	41	42	2.09366e-05	41	42	5.81219e-05	68	69	1.95467e-05	370	371	8.01692e-05	NA	NA	NA	NA	NA
FVHSWTNL	TTTGTCCACTCTTGGACGAACCTA	WT	356	357	9.59437e-05	168	169	0.000124934	657	658	0.000105212	NA	NA	NA	NA	NA	NA	NA	NA	NA	267	268	5.69689e-05	116	117	5.41682e-05	48	49	6.13192e-05	112	113	6.08114e-05	282	283	0.000141073	NA	1	1.38386e-06	20	21	5.94898e-06	697	698	0.00015083	NA	NA	NA	NA	NA
FVIHFFEV	TTTGTAATACACTTCTTTGAGGTG	WT	409	410	0.000110187	142	143	0.000105714	584	585	9.35398e-05	NA	NA	NA	NA	NA	NA	NA	NA	NA	238	239	5.08043e-05	125	126	5.8335e-05	46	47	5.88164e-05	65	66	3.55182e-05	1	2	9.96983e-07	1	2	2.76771e-06	27	28	7.93198e-06	14	15	3.24134e-06	NA	NA	NA	NA	NA
FVIIFQNL	TTTGTAATTATCTTCCAAAACTTA	WT	527	528	0.0001419	207	208	0.000153765	864	865	0.000138311	NA	NA	NA	NA	NA	NA	NA	NA	NA	304	305	6.4834e-05	177	178	8.24097e-05	56	57	7.13305e-05	15	16	8.61047e-06	2	3	1.49547e-06	5	6	8.30313e-06	65	66	1.86968e-05	397	398	8.60036e-05	NA	NA	NA	NA	NA
FVKSYENL	TTTGTAAAGAGCTACGAGAATCTG	WT	382	383	0.000102931	136	137	0.000101278	610	611	9.76971e-05	NA	NA	NA	NA	NA	NA	NA	NA	NA	206	207	4.40021e-05	105	106	4.90755e-05	28	29	3.6291e-05	10	11	5.9197e-06	152	153	7.62692e-05	NA	1	1.38386e-06	105	106	3.00282e-05	168	169	3.65191e-05	NA	NA	NA	NA	NA
FVLCHGLL	TTCGTCCTCTGCCACGGGTTGTTG	WT	394	395	0.000106156	166	167	0.000123456	804	805	0.000128717	NA	NA	NA	NA	NA	NA	NA	NA	NA	313	314	6.67471e-05	131	132	6.11128e-05	59	60	7.50848e-05	371	372	0.000200193	11	12	5.9819e-06	46	47	6.50412e-05	10	11	3.11613e-06	248	249	5.38063e-05	NA	NA	NA	NA	NA
FVMKYNLM	TTTGTCATGAAGTATAACCTTATG	WT	270	271	7.28312e-05	150	151	0.000111628	445	446	7.13141e-05	NA	NA	NA	NA	NA	NA	NA	NA	NA	142	143	3.03976e-05	67	68	3.14824e-05	18	19	2.37768e-05	NA	1	5.38154e-07	542	543	0.000270681	NA	1	1.38386e-06	4	5	1.41642e-06	29	30	6.48269e-06	NA	NA	NA	NA	NA
FVPKFAGL	TTTGTGCCAAAATTCGCGGGCTTA	WT	171	172	4.6225e-05	95	96	7.09685e-05	224	225	3.59768e-05	NA	NA	NA	NA	NA	NA	NA	NA	NA	71	72	1.53051e-05	42	43	1.9908e-05	24	25	3.12853e-05	1	2	1.07631e-06	1	2	9.96983e-07	NA	1	1.38386e-06	227	228	6.4589e-05	654	655	0.000141539	NA	NA	NA	NA	NA
FVQCYHEL	TTTGTCCAGTGCTACCACGAGCTG	WT	153	154	4.13875e-05	56	57	4.21376e-05	296	297	4.74894e-05	NA	NA	NA	NA	NA	NA	NA	NA	NA	124	125	2.65713e-05	42	43	1.9908e-05	9	10	1.25141e-05	3	4	2.15262e-06	4	5	2.49246e-06	NA	1	1.38386e-06	NA	1	2.83285e-07	39	40	8.64358e-06	NA	NA	NA	NA	NA
FVRVWVEL	TTCGTTCGGGTGTGGGTAGAACTA	WT	134	135	3.62812e-05	48	49	3.62235e-05	240	241	3.85352e-05	NA	NA	NA	NA	NA	NA	NA	NA	NA	76	77	1.63679e-05	42	43	1.9908e-05	9	10	1.25141e-05	NA	1	5.38154e-07	1	2	9.96983e-07	1	2	2.76771e-06	516	517	0.000146458	13	14	3.02525e-06	NA	NA	NA	NA	NA
FVTIFGNI	TTTGTTACGATCTTTGGAAATATA	WT	2431	2432	0.0006536	921	922	0.000681594	3951	3952	0.000631913	NA	NA	NA	NA	NA	NA	NA	NA	NA	1628	1629	0.000346277	703	704	0.000325935	240	241	0.00030159	561	562	0.000302443	208	209	0.000104185	50	51	7.05766e-05	453	454	0.000128611	662	663	0.000143267	NA	NA	NA	NA	NA
FVVPRFKL	TTCGTAGTCCCTCGATTTAAGCTT	WT	304	305	8.19687e-05	147	148	0.00010941	573	574	9.17809e-05	NA	NA	NA	NA	NA	NA	NA	NA	NA	251	252	5.35677e-05	102	103	4.76865e-05	32	33	4.12966e-05	85	86	4.62813e-05	9	10	4.98492e-06	3	4	5.53542e-06	113	114	3.22945e-05	843	844	0.00018238	NA	NA	NA	NA	NA
FVVVFAVL	TTTGTGGTAGTGTTCGCCGTTTTA	WT	519	520	0.00013975	201	202	0.00014933	1038	1039	0.000166133	NA	NA	NA	NA	NA	NA	NA	NA	NA	338	339	7.20614e-05	167	168	7.778e-05	55	56	7.00791e-05	486	487	0.000262081	30	31	1.54532e-05	15	16	2.21417e-05	708	709	0.000200849	207	208	4.49466e-05	NA	NA	NA	NA	NA
FWFYNYGL	TTTTGGTTTTATAACTACGGACTT	WT	418	419	0.000112606	186	187	0.000138241	831	832	0.000133034	NA	NA	NA	NA	NA	NA	NA	NA	NA	333	334	7.09985e-05	170	171	7.91689e-05	44	45	5.63136e-05	62	63	3.39037e-05	927	928	0.0004626	16	17	2.35255e-05	47	48	1.35977e-05	3	4	8.64358e-07	NA	NA	NA	NA	NA
FWYDMAAL	TTCTGGTATGATATGGCGGCTTTG	WT	248	249	6.69187e-05	88	89	6.57938e-05	450	451	7.21136e-05	NA	NA	NA	NA	NA	NA	NA	NA	NA	142	143	3.03976e-05	65	66	3.05564e-05	25	26	3.25367e-05	1	2	1.07631e-06	55	56	2.79155e-05	1	2	2.76771e-06	429	430	0.000121813	13	14	3.02525e-06	NA	NA	NA	NA	NA
FYFAFVTL	TTTTACTTCGCTTTCGTAACACTG	WT	1710	1711	0.000459831	498	499	0.000368889	2554	2555	0.000408537	NA	NA	NA	NA	NA	NA	NA	NA	NA	989	990	0.000210445	489	490	0.000226858	163	164	0.000205232	314	315	0.000169519	477	478	0.000238279	107	108	0.000149456	4171	4172	0.00118186	1126	1127	0.000243533	NA	NA	NA	NA	NA
FYFRGYGL	TTCTACTTTCGAGGTTACGGGCTG	WT	626	627	0.000168506	196	197	0.000145633	1115	1116	0.000178445	NA	NA	NA	NA	NA	NA	NA	NA	NA	396	397	8.43904e-05	173	174	8.05578e-05	65	66	8.25932e-05	39	40	2.15262e-05	203	204	0.000101692	4	5	6.91928e-06	234	235	6.6572e-05	408	409	8.83806e-05	NA	NA	NA	NA	NA
FYKFVPLL	TTCTATAAATTCGTGCCTCTTCTC	WT	375	376	0.00010105	127	128	9.46247e-05	653	654	0.000104573	NA	NA	NA	NA	NA	NA	NA	NA	NA	222	223	4.74032e-05	130	131	6.06499e-05	40	41	5.13079e-05	6	7	3.76708e-06	29	30	1.49547e-05	12	13	1.79901e-05	963	964	0.000273087	15	16	3.45743e-06	NA	NA	NA	NA	NA
FYNFRGLL	TTCTACAACTTCAGGGGTCTCCTA	WT	975	976	0.0002623	366	367	0.000271307	1613	1614	0.000258074	NA	NA	NA	NA	NA	NA	NA	NA	NA	628	629	0.000133707	290	291	0.000134726	118	119	0.000148918	144	145	7.80324e-05	4	5	2.49246e-06	248	249	0.00034458	864	865	0.000245041	487	488	0.000105452	NA	NA	NA	NA	NA
FYNTFTAL	TTTTACAACACGTTCACTGCGTTA	WT	481	482	0.000129537	158	159	0.000117542	835	836	0.000133674	NA	NA	NA	NA	NA	NA	NA	NA	NA	315	316	6.71722e-05	151	152	7.03724e-05	48	49	6.13192e-05	5	6	3.22893e-06	4	5	2.49246e-06	1	2	2.76771e-06	143	144	4.0793e-05	39	40	8.64358e-06	NA	NA	NA	NA	NA
FYPQYGAL	TTTTATCCGCAGTATGGGGCACTC	WT	935	936	0.00025155	335	336	0.00024839	1575	1576	0.000251998	NA	NA	NA	NA	NA	NA	NA	NA	NA	453	454	9.6507e-05	253	254	0.000117596	76	77	9.63588e-05	136	137	7.37271e-05	20	21	1.04683e-05	12	13	1.79901e-05	10	11	3.11613e-06	325	326	7.04452e-05	NA	NA	NA	NA	NA
FYRTWTHL	TTTTATCGAACCTGGACCCACTTG	WT	606	607	0.000163131	238	239	0.000176682	1151	1152	0.000184201	NA	NA	NA	NA	NA	NA	NA	NA	NA	425	426	9.0555e-05	186	187	8.65765e-05	74	75	9.38559e-05	77	78	4.1976e-05	31	32	1.59517e-05	14	15	2.07578e-05	55	56	1.5864e-05	346	347	7.49831e-05	NA	NA	NA	NA	NA
FYTLYENL	TTCTACACACTATACGAAAATTTA	WT	157	158	4.24625e-05	82	83	6.13582e-05	292	293	4.68499e-05	NA	NA	NA	NA	NA	NA	NA	NA	NA	113	114	2.4233e-05	47	48	2.22228e-05	28	29	3.6291e-05	1	2	1.07631e-06	9	10	4.98492e-06	NA	1	1.38386e-06	102	103	2.91783e-05	NA	1	2.1609e-07	NA	NA	NA	NA	NA
FYYMAVSL	TTCTATTACATGGCAGTAAGCCTC	WT	513	514	0.000138137	175	176	0.000130109	898	899	0.000143747	NA	NA	NA	NA	NA	NA	NA	NA	NA	308	309	6.56843e-05	154	155	7.17613e-05	65	66	8.25932e-05	265	266	0.000143149	9607	9608	0.00478951	1	2	2.76771e-06	27	28	7.93198e-06	2262	2263	0.000489011	NA	NA	NA	NA	NA
GAIRFFAF	GGGGCCATCCGATTCTTTGCCTTC	WT	219	220	5.9125e-05	78	79	5.84012e-05	519	520	8.31465e-05	NA	NA	NA	NA	NA	NA	NA	NA	NA	169	170	3.6137e-05	94	95	4.39827e-05	34	35	4.37994e-05	NA	1	5.38154e-07	3	4	1.99397e-06	17	18	2.49094e-05	21	22	6.23227e-06	11	12	2.59307e-06	NA	NA	NA	NA	NA
GALLFSKL	GGCGCTCTATTATTTTCGAAGCTA	WT	365	366	9.83625e-05	170	171	0.000126413	722	723	0.000115606	NA	NA	NA	NA	NA	NA	NA	NA	NA	267	268	5.69689e-05	145	146	6.75945e-05	46	47	5.88164e-05	123	124	6.67311e-05	7	8	3.98793e-06	NA	1	1.38386e-06	16	17	4.81584e-06	187	188	4.06248e-05	NA	NA	NA	NA	NA
GALVFQAL	GGTGCTTTGGTCTTCCAAGCGCTC	WT	288	289	7.76687e-05	95	96	7.09685e-05	482	483	7.72303e-05	NA	NA	NA	NA	NA	NA	NA	NA	NA	154	155	3.29484e-05	93	94	4.35197e-05	34	35	4.37994e-05	275	276	0.000148531	13	14	6.97888e-06	3	4	5.53542e-06	93	94	2.66288e-05	37	38	8.2114e-06	NA	NA	NA	NA	NA
GAPGFINL	GGTGCGCCTGGTTTTATTAACCTA	WT	1113	1114	0.000299387	430	431	0.000318619	2156	2157	0.000344898	NA	NA	NA	NA	NA	NA	NA	NA	NA	740	741	0.000157515	324	325	0.000150467	106	107	0.000133901	792	793	0.000426756	156	157	7.82632e-05	30	31	4.28995e-05	179	180	5.09913e-05	553	554	0.000119714	NA	NA	NA	NA	NA
GASSFFPL	GGCGCATCATCATTCTTTCCCTTA	WT	783	784	0.0002107	220	221	0.000163376	1113	1114	0.000178125	NA	NA	NA	NA	NA	NA	NA	NA	NA	488	489	0.000103947	224	225	0.00010417	68	69	8.63475e-05	37	38	2.04499e-05	204	205	0.000102191	78	79	0.000109325	733	734	0.000207931	414	415	8.96771e-05	NA	NA	NA	NA	NA
GAYLYSNS	GGAGCTTATCTTTACTCGAATTCC	WT	560	561	0.000150769	138	139	0.000102757	815	816	0.000130476	NA	NA	NA	NA	NA	NA	NA	NA	NA	301	302	6.41963e-05	164	165	7.6391e-05	48	49	6.13192e-05	263	264	0.000142073	35	36	1.79457e-05	80	81	0.000112092	1337	1338	0.000379035	284	285	6.15855e-05	NA	NA	NA	NA	NA
GFEYINPL	GGCTTTGAGTACATAAACCCACTA	WT	392	393	0.000105619	151	152	0.000112367	729	730	0.000116725	NA	NA	NA	NA	NA	NA	NA	NA	NA	245	246	5.22923e-05	143	144	6.66685e-05	51	52	6.50735e-05	73	74	3.98234e-05	377	378	0.00018843	NA	1	1.38386e-06	41	42	1.1898e-05	203	204	4.40823e-05	NA	NA	NA	NA	NA
GFFRMPQL	GGATTCTTCAGAATGCCGCAACTG	WT	387	388	0.000104275	131	132	9.75817e-05	724	725	0.000115925	NA	NA	NA	NA	NA	NA	NA	NA	NA	247	248	5.27175e-05	118	119	5.50941e-05	42	43	5.38107e-05	477	478	0.000257238	559	560	0.000279155	NA	1	1.38386e-06	717	718	0.000203399	34	35	7.56313e-06	NA	NA	NA	NA	NA
GFLAFTQL	GGATTCTTAGCGTTCACACAGCTA	WT	326	327	8.78812e-05	107	108	7.98396e-05	631	632	0.000101055	NA	NA	NA	NA	NA	NA	NA	NA	NA	186	187	3.97507e-05	88	89	4.12049e-05	22	23	2.87825e-05	124	125	6.72693e-05	7	8	3.98793e-06	4	5	6.91928e-06	2	3	8.49855e-07	90	91	1.96641e-05	NA	NA	NA	NA	NA
GFRNFLLL	GGATTCCGAAATTTCTTGCTTCTC	WT	783	784	0.0002107	307	308	0.000227691	1261	1262	0.00020179	NA	NA	NA	NA	NA	NA	NA	NA	NA	514	515	0.000109474	235	236	0.000109262	76	77	9.63588e-05	62	63	3.39037e-05	215	216	0.000107674	3	4	5.53542e-06	671	672	0.000190367	19	20	4.32179e-06	NA	NA	NA	NA	NA
GFSSYSSL	GGGTTCTCATCTTACAGCTCACTT	WT	723	724	0.000194575	238	239	0.000176682	1021	1022	0.000163415	NA	NA	NA	NA	NA	NA	NA	NA	NA	414	415	8.82167e-05	174	175	8.10208e-05	52	53	6.63249e-05	348	349	0.000187816	90	91	4.53627e-05	60	61	8.44152e-05	370	371	0.000105099	204	205	4.42983e-05	NA	NA	NA	NA	NA
GFVHWFPL	GGATTCGTCCACTGGTTTCCGTTA	WT	291	292	7.8475e-05	114	115	8.50144e-05	461	462	7.38725e-05	NA	NA	NA	NA	NA	NA	NA	NA	NA	214	215	4.57026e-05	70	71	3.28713e-05	33	34	4.2548e-05	89	90	4.84339e-05	4	5	2.49246e-06	5	6	8.30313e-06	234	235	6.6572e-05	759	760	0.000164228	NA	NA	NA	NA	NA
GGFSYADV	GGAGGCTTTAGCTATGCCGATGTC	WT	409	410	0.000110187	100	101	7.46648e-05	585	586	9.36997e-05	NA	NA	NA	NA	NA	NA	NA	NA	NA	224	225	4.78283e-05	84	85	3.9353e-05	39	40	5.00565e-05	230	231	0.000124314	107	108	5.38371e-05	24	25	3.45964e-05	264	265	7.50705e-05	112	113	2.44181e-05	NA	NA	NA	NA	NA
GGFVKFLL	GGTGGCTTCGTAAAATTCCTGCTT	WT	1172	1173	0.000315244	426	427	0.000315662	1794	1795	0.000287015	NA	NA	NA	NA	NA	NA	NA	NA	NA	790	791	0.000168143	319	320	0.000148152	120	121	0.000151421	519	520	0.00027984	21	22	1.09668e-05	272	273	0.000377792	7837	7838	0.00222039	1594	1595	0.000344663	NA	NA	NA	NA	NA
GGFVYRGV	GGCGGGTTTGTCTACCGCGGCGTA	WT	162	163	4.38062e-05	40	41	3.03095e-05	217	218	3.48576e-05	NA	NA	NA	NA	NA	NA	NA	NA	NA	65	66	1.40296e-05	26	27	1.25004e-05	10	11	1.37655e-05	NA	1	5.38154e-07	NA	1	4.98492e-07	NA	1	1.38386e-06	NA	1	2.83285e-07	1	2	4.32179e-07	NA	NA	NA	NA	NA
GGITFFPV	GGAGGAATCACGTTCTTCCCCGTT	WT	835	836	0.000224675	267	268	0.000198121	1480	1481	0.000236808	NA	NA	NA	NA	NA	NA	NA	NA	NA	524	525	0.000111599	222	223	0.000103244	111	112	0.000140158	748	749	0.000403078	222	223	0.000111164	30	31	4.28995e-05	607	608	0.000172237	817	818	0.000176761	NA	NA	NA	NA	NA
GGMAFILL	GGTGGGATGGCGTTCATTCTCCTG	WT	390	391	0.000105081	116	117	8.64929e-05	601	602	9.62581e-05	NA	NA	NA	NA	NA	NA	NA	NA	NA	272	273	5.80317e-05	114	115	5.32422e-05	53	54	6.75763e-05	387	388	0.000208804	98	99	4.93507e-05	130	131	0.000181285	60	61	1.72804e-05	2	3	6.48269e-07	NA	NA	NA	NA	NA
GGPFFFCL	GGCGGCCCGTTCTTCTTCTGTCTG	WT	685	686	0.000184362	210	211	0.000155983	971	972	0.00015542	NA	NA	NA	NA	NA	NA	NA	NA	NA	343	344	7.31242e-05	152	153	7.08353e-05	72	73	9.13531e-05	178	179	9.63296e-05	103	104	5.18431e-05	53	54	7.47282e-05	210	211	5.97731e-05	42	43	9.29185e-06	NA	NA	NA	NA	NA
GGWSFTNF	GGAGGTTGGTCCTTCACGAACTTT	WT	177	178	4.78375e-05	99	100	7.39256e-05	388	389	6.22e-05	NA	NA	NA	NA	NA	NA	NA	NA	NA	134	135	2.8697e-05	59	60	2.77786e-05	25	26	3.25367e-05	NA	1	5.38154e-07	NA	1	4.98492e-07	7	8	1.10708e-05	NA	1	2.83285e-07	21	22	4.75397e-06	NA	NA	NA	NA	NA
GGYFLPRL	GGCGGCTATTTTCTCCCGAGACTT	WT	281	282	7.57875e-05	133	134	9.90603e-05	477	478	7.64308e-05	NA	NA	NA	NA	NA	NA	NA	NA	NA	175	176	3.74124e-05	75	76	3.51862e-05	17	18	2.25254e-05	9	10	5.38154e-06	6	7	3.48944e-06	3	4	5.53542e-06	130	131	3.71103e-05	297	298	6.43947e-05	NA	NA	NA	NA	NA
GHLLFPGL	GGGCATCTGCTCTTCCCTGGGCTC	WT	2008	2009	0.000539919	738	739	0.00054631	3718	3719	0.000594657	NA	NA	NA	NA	NA	NA	NA	NA	NA	1196	1197	0.000254447	585	586	0.000271304	221	222	0.000277814	2045	2046	0.00110106	285	286	0.000142569	184	185	0.000256013	1177	1178	0.00033371	4278	4279	0.000924647	NA	NA	NA	NA	NA
GHMLFFLL	GGCCATATGCTATTCTTCTTGCTT	WT	1383	1384	0.00037195	483	484	0.0003578	2335	2336	0.00037352	NA	NA	NA	NA	NA	NA	NA	NA	NA	757	758	0.000161128	410	411	0.000190283	140	141	0.000176449	730	731	0.000393391	46	47	2.34291e-05	650	651	0.00090089	1511	1512	0.000428327	1855	1856	0.000401062	NA	NA	NA	NA	NA
GHYPFAGI	GGTCACTATCCTTTTGCTGGCATC	WT	407	408	0.00010965	197	198	0.000146373	726	727	0.000116245	NA	NA	NA	NA	NA	NA	NA	NA	NA	308	309	6.56843e-05	148	149	6.89834e-05	39	40	5.00565e-05	106	107	5.75825e-05	25	26	1.29608e-05	88	89	0.000123163	212	213	6.03397e-05	23	24	5.18615e-06	NA	NA	NA	NA	NA
GIFFCMAL	GGAATTTTCTTCTGCATGGCGCTT	WT	1520	1521	0.000408769	527	528	0.000390327	2632	2633	0.000421009	NA	NA	NA	NA	NA	NA	NA	NA	NA	983	984	0.000209169	471	472	0.000218525	164	165	0.000206483	2374	2375	0.00127812	2810	2811	0.00140126	19	20	2.76771e-05	1218	1219	0.000345324	1845	1846	0.000398901	NA	NA	NA	NA	NA
GIFNRYNV	GGCATCTTTAACAGATATAATGTG	WT	168	169	4.54187e-05	57	58	4.28768e-05	314	315	5.03676e-05	NA	NA	NA	NA	NA	NA	NA	NA	NA	100	101	2.14696e-05	54	55	2.54637e-05	16	17	2.1274e-05	5	6	3.22893e-06	166	167	8.32481e-05	NA	1	1.38386e-06	NA	1	2.83285e-07	23	24	5.18615e-06	NA	NA	NA	NA	NA
GIIQFIKL	GGGATAATTCAATTTATCAAACTC	WT	255	256	6.88e-05	85	86	6.3576e-05	359	360	5.7563e-05	NA	NA	NA	NA	NA	NA	NA	NA	NA	173	174	3.69872e-05	59	60	2.77786e-05	27	28	3.50396e-05	NA	1	5.38154e-07	3	4	1.99397e-06	NA	1	1.38386e-06	20	21	5.94898e-06	8	9	1.94481e-06	NA	NA	NA	NA	NA
GLSHFAAL	GGGCTAAGCCATTTTGCAGCATTG	WT	353	354	9.51375e-05	144	145	0.000107192	525	526	8.41059e-05	NA	NA	NA	NA	NA	NA	NA	NA	NA	177	178	3.78375e-05	76	77	3.56492e-05	29	30	3.75424e-05	298	299	0.000160908	8	9	4.48642e-06	5	6	8.30313e-06	2	3	8.49855e-07	11	12	2.59307e-06	NA	NA	NA	NA	NA
GLYYFLKI	GGTCTCTACTATTTCTTGAAAATT	WT	1121	1122	0.000301537	444	445	0.000328969	2109	2110	0.000337383	NA	NA	NA	NA	NA	NA	NA	NA	NA	767	768	0.000163254	382	383	0.00017732	118	119	0.000148918	336	337	0.000181358	781	782	0.00038982	116	117	0.000161911	164	165	4.6742e-05	1546	1547	0.00033429	NA	NA	NA	NA	NA
GMFKYEEI	GGAATGTTCAAATACGAGGAGATT	WT	379	380	0.000102125	169	170	0.000125673	750	751	0.000120083	NA	NA	NA	NA	NA	NA	NA	NA	NA	243	244	5.18672e-05	132	133	6.15758e-05	42	43	5.38107e-05	1	2	1.07631e-06	6	7	3.48944e-06	7	8	1.10708e-05	102	103	2.91783e-05	3805	3806	0.000822437	NA	NA	NA	NA	NA
GMFLQLYL	GGAATGTTTCTGCAACTCTATTTG	WT	452	453	0.000121744	165	166	0.000122716	791	792	0.000126639	NA	NA	NA	NA	NA	NA	NA	NA	NA	272	273	5.80317e-05	126	127	5.8798e-05	42	43	5.38107e-05	62	63	3.39037e-05	66	67	3.33989e-05	21	22	3.04448e-05	422	423	0.00011983	18	19	4.1057e-06	NA	NA	NA	NA	NA
GMFSFTGL	GGCATGTTCTCATTCACCGGATTG	WT	464	465	0.000124969	191	192	0.000141937	764	765	0.000122321	NA	NA	NA	NA	NA	NA	NA	NA	NA	287	288	6.12203e-05	141	142	6.57426e-05	57	58	7.25819e-05	10	11	5.9197e-06	149	150	7.47737e-05	NA	1	1.38386e-06	9	10	2.83285e-06	59	60	1.29654e-05	NA	NA	NA	NA	NA
GMVVFWNL	GGCATGGTGGTCTTTTGGAATTTA	WT	560	561	0.000150769	190	191	0.000141198	1070	1071	0.00017125	NA	NA	NA	NA	NA	NA	NA	NA	NA	411	412	8.7579e-05	189	190	8.79654e-05	59	60	7.50848e-05	507	508	0.000273382	4916	4917	0.00245108	16	17	2.35255e-05	768	769	0.000217846	3140	3141	0.000678737	NA	NA	NA	NA	NA
GNFELVSL	GGGAACTTTGAACTTGTCTCGCTC	WT	193	194	5.21375e-05	98	99	7.31863e-05	332	333	5.32457e-05	NA	NA	NA	NA	NA	NA	NA	NA	NA	95	96	2.04068e-05	35	36	1.66671e-05	11	12	1.5017e-05	2	3	1.61446e-06	NA	1	4.98492e-07	2	3	4.15157e-06	40	41	1.16147e-05	11	12	2.59307e-06	NA	NA	NA	NA	NA
GNIVYTYV	GGAAATATAGTGTATACTTACGTA	WT	554	555	0.000149156	215	216	0.000159679	863	864	0.000138151	NA	NA	NA	NA	NA	NA	NA	NA	NA	331	332	7.05734e-05	152	153	7.08353e-05	61	62	7.75876e-05	68	69	3.71326e-05	11	12	5.9819e-06	48	49	6.78089e-05	51	52	1.47308e-05	126	127	2.74434e-05	NA	NA	NA	NA	NA
GNTYFAFL	GGTAATACTTACTTCGCATTCTTG	WT	713	714	0.000191887	250	251	0.000185553	1188	1189	0.000190118	NA	NA	NA	NA	NA	NA	NA	NA	NA	409	410	8.71539e-05	194	195	9.02803e-05	73	74	9.26045e-05	279	280	0.000150683	975	976	0.000486528	217	218	0.00030168	2555	2556	0.000724076	309	310	6.69877e-05	NA	NA	NA	NA	NA
GNYFWVLL	GGAAACTACTTCTGGGTTCTATTG	WT	280	281	7.55187e-05	68	69	5.10086e-05	384	385	6.15604e-05	NA	NA	NA	NA	NA	NA	NA	NA	NA	181	182	3.86878e-05	78	79	3.65751e-05	40	41	5.13079e-05	33	34	1.82972e-05	4	5	2.49246e-06	NA	1	1.38386e-06	4	5	1.41642e-06	20	21	4.53788e-06	NA	NA	NA	NA	NA
GQFDYALV	GGTCAGTTCGACTACGCACTAGTA	WT	155	156	4.1925e-05	65	66	4.87909e-05	283	284	4.54108e-05	NA	NA	NA	NA	NA	NA	NA	NA	NA	89	90	1.91313e-05	45	46	2.12969e-05	13	14	1.75198e-05	11	12	6.45785e-06	NA	1	4.98492e-07	39	40	5.53542e-05	43	44	1.24645e-05	2	3	6.48269e-07	NA	NA	NA	NA	NA
GQFGFQRL	GGACAGTTTGGTTTCCAAAGACTT	WT	452	453	0.000121744	146	147	0.000108671	744	745	0.000119123	NA	NA	NA	NA	NA	NA	NA	NA	NA	315	316	6.71722e-05	132	133	6.15758e-05	41	42	5.25593e-05	67	68	3.65945e-05	54	55	2.7417e-05	1	2	2.76771e-06	13	14	3.96599e-06	49	50	1.08045e-05	NA	NA	NA	NA	NA
GQFLRVPL	GGACAATTTCTGCGCGTTCCTCTT	WT	767	768	0.0002064	267	268	0.000198121	1362	1363	0.00021794	NA	NA	NA	NA	NA	NA	NA	NA	NA	511	512	0.000108836	245	246	0.000113892	82	83	0.000103867	90	91	4.8972e-05	246	247	0.000123127	178	179	0.00024771	169	170	4.81584e-05	198	199	4.30018e-05	NA	NA	NA	NA	NA
GQFSFAEV	GGCCAATTTTCGTTCGCCGAGGTA	WT	434	435	0.000116906	138	139	0.000102757	808	809	0.000129357	NA	NA	NA	NA	NA	NA	NA	NA	NA	312	313	6.65345e-05	150	151	6.99094e-05	45	46	5.7565e-05	685	686	0.000369174	25	26	1.29608e-05	4	5	6.91928e-06	8	9	2.54956e-06	81	82	1.77193e-05	NA	NA	NA	NA	NA
GQYVCSPL	GGGCAATACGTCTGCAGCCCGTTA	WT	437	438	0.000117712	166	167	0.000123456	786	787	0.000125839	NA	NA	NA	NA	NA	NA	NA	NA	NA	285	286	6.07951e-05	111	112	5.18533e-05	41	42	5.25593e-05	23	24	1.29157e-05	140	141	7.02873e-05	NA	1	1.38386e-06	564	565	0.000160056	789	790	0.000170711	NA	NA	NA	NA	NA
GSAPFLFL	GGTTCGGCACCGTTTCTGTTTCTA	WT	1538	1539	0.000413606	547	548	0.000405112	2616	2617	0.000418451	NA	NA	NA	NA	NA	NA	NA	NA	NA	1028	1029	0.000218735	459	460	0.000212969	157	158	0.000197723	1160	1161	0.000624797	2543	2544	0.00126816	126	127	0.00017575	768	769	0.000217846	2186	2187	0.000472588	NA	NA	NA	NA	NA
GSASFILL	GGGTCGGCGTCTTTCATCCTCTTG	WT	564	565	0.000151844	267	268	0.000198121	1188	1189	0.000190118	NA	NA	NA	NA	NA	NA	NA	NA	NA	491	492	0.000104585	166	167	7.7317e-05	71	72	9.01017e-05	230	231	0.000124314	772	773	0.000385334	55	56	7.74959e-05	674	675	0.000191217	850	851	0.000183892	NA	NA	NA	NA	NA
GSFFSLLL	GGTTCATTCTTCAGCTTGCTATTG	WT	579	580	0.000155875	258	259	0.000191467	933	934	0.000149344	NA	NA	NA	NA	NA	NA	NA	NA	NA	422	423	8.99173e-05	174	175	8.10208e-05	70	71	8.88503e-05	585	586	0.000315358	1598	1599	0.000797088	2	3	4.15157e-06	603	604	0.000171104	43	44	9.50794e-06	NA	NA	NA	NA	NA
GSFFTLNL	GGCTCATTCTTTACATTAAACTTG	WT	327	328	8.815e-05	127	128	9.46247e-05	703	704	0.000112568	NA	NA	NA	NA	NA	NA	NA	NA	NA	217	218	4.63403e-05	90	91	4.21308e-05	43	44	5.50622e-05	16	17	9.14862e-06	80	81	4.03778e-05	2	3	4.15157e-06	73	74	2.09631e-05	18	19	4.1057e-06	NA	NA	NA	NA	NA
GSFHLIRL	GGGAGTTTTCACCTAATTCGTTTA	WT	495	496	0.0001333	174	175	0.00012937	739	740	0.000118324	NA	NA	NA	NA	NA	NA	NA	NA	NA	331	332	7.05734e-05	141	142	6.57426e-05	46	47	5.88164e-05	13	14	7.53416e-06	7	8	3.98793e-06	478	479	0.000662867	197	198	5.60904e-05	1358	1359	0.000293666	NA	NA	NA	NA	NA
GSFLAANM	GGGTCTTTCCTTGCTGCTAATATG	WT	289	290	7.79375e-05	121	122	9.01892e-05	513	514	8.21871e-05	NA	NA	NA	NA	NA	NA	NA	NA	NA	208	209	4.44272e-05	66	67	3.10194e-05	28	29	3.6291e-05	9	10	5.38154e-06	12	13	6.48039e-06	16	17	2.35255e-05	48	49	1.3881e-05	191	192	4.14892e-05	NA	NA	NA	NA	NA
GSFPYDSV	GGTTCGTTTCCGTATGACTCTGTC	WT	661	662	0.000177912	316	317	0.000234344	1300	1301	0.000208026	NA	NA	NA	NA	NA	NA	NA	NA	NA	510	511	0.000108623	230	231	0.000106947	72	73	9.13531e-05	369	370	0.000199117	160	161	8.02571e-05	598	599	0.000828929	2669	2670	0.000756371	2911	2912	0.000629253	NA	NA	NA	NA	NA
GSFSMGML	GGGAGCTTCTCTATGGGTATGTTG	WT	952	953	0.000256119	297	298	0.000220298	1518	1519	0.000242884	NA	NA	NA	NA	NA	NA	NA	NA	NA	522	523	0.000111174	226	227	0.000105096	85	86	0.000107621	67	68	3.65945e-05	522	523	0.000260711	39	40	5.53542e-05	42	43	1.21813e-05	350	351	7.58474e-05	NA	NA	NA	NA	NA
GSFVSGQL	GGTTCCTTTGTGTCGGGGCAACTA	WT	249	250	6.71875e-05	99	100	7.39256e-05	502	503	8.04282e-05	NA	NA	NA	NA	NA	NA	NA	NA	NA	207	208	4.42146e-05	71	72	3.33343e-05	37	38	4.75537e-05	37	38	2.04499e-05	118	119	5.93205e-05	NA	1	1.38386e-06	128	129	3.65438e-05	NA	1	2.1609e-07	NA	NA	NA	NA	NA
GSGAFMYL	GGTTCCGGAGCCTTCATGTATTTG	WT	400	401	0.000107769	172	173	0.000127891	742	743	0.000118804	NA	NA	NA	NA	NA	NA	NA	NA	NA	247	248	5.27175e-05	113	114	5.27793e-05	35	36	4.50509e-05	52	53	2.85222e-05	822	823	0.000410259	63	64	8.85667e-05	58	59	1.67138e-05	152	153	3.30617e-05	NA	NA	NA	NA	NA
GSGMFPPL	GGGAGTGGGATGTTCCCACCCCTT	WT	78	79	2.12312e-05	28	29	2.14384e-05	82	83	1.32715e-05	NA	NA	NA	NA	NA	NA	NA	NA	NA	59	60	1.27542e-05	25	26	1.20374e-05	12	13	1.62684e-05	8	9	4.84339e-06	102	103	5.13446e-05	NA	1	1.38386e-06	NA	1	2.83285e-07	2	3	6.48269e-07	NA	NA	NA	NA	NA
GSIVFTFI	GGATCAATAGTGTTTACCTTTATC	WT	2037	2038	0.000547712	714	715	0.000528568	3362	3363	0.000537734	NA	NA	NA	NA	NA	NA	NA	NA	NA	1187	1188	0.000252534	545	546	0.000252785	213	214	0.000267802	309	310	0.000166828	263	264	0.000131602	1120	1121	0.0015513	2363	2364	0.000669686	2108	2109	0.000455733	NA	NA	NA	NA	NA
GSLPFFLL	GGCAGTCTCCCATTCTTCTTACTA	WT	1062	1063	0.000285681	360	361	0.000266871	1639	1640	0.000262231	NA	NA	NA	NA	NA	NA	NA	NA	NA	547	548	0.000116489	269	270	0.000125004	104	105	0.000131398	2254	2255	0.00121354	23	24	1.19638e-05	35	36	4.98188e-05	1390	1391	0.000394049	1740	1741	0.000376212	NA	NA	NA	NA	NA
GSQYFIFL	GGCTCCCAATATTTCATATTCTTA	WT	942	943	0.000253431	335	336	0.00024839	1487	1488	0.000237927	NA	NA	NA	NA	NA	NA	NA	NA	NA	568	569	0.000120953	278	279	0.00012917	96	97	0.000121387	72	73	3.92853e-05	152	153	7.62692e-05	1	2	2.76771e-06	1703	1704	0.000482717	1050	1051	0.00022711	NA	NA	NA	NA	NA
GSRFFKTL	GGGAGTAGGTTCTTTAAGACCCTA	WT	299	300	8.0625e-05	77	78	5.76619e-05	415	416	6.65172e-05	NA	NA	NA	NA	NA	NA	NA	NA	NA	210	211	4.48524e-05	78	79	3.65751e-05	18	19	2.37768e-05	1	2	1.07631e-06	96	97	4.83537e-05	20	21	2.9061e-05	47	48	1.35977e-05	103	104	2.24733e-05	NA	NA	NA	NA	NA
GSSFFSAL	GGCAGCTCGTTCTTTAGCGCCTTG	WT	518	519	0.000139481	216	217	0.000160418	837	838	0.000133994	NA	NA	NA	NA	NA	NA	NA	NA	NA	308	309	6.56843e-05	137	138	6.38907e-05	55	56	7.00791e-05	33	34	1.82972e-05	401	402	0.000200394	39	40	5.53542e-05	616	617	0.000174787	215	216	4.66753e-05	NA	NA	NA	NA	NA
GSYAMTEL	GGAAGTTATGCTATGACGGAATTG	WT	394	395	0.000106156	161	162	0.000119759	818	819	0.000130956	NA	NA	NA	NA	NA	NA	NA	NA	NA	245	246	5.22923e-05	104	105	4.86125e-05	40	41	5.13079e-05	304	305	0.000164137	1252	1253	0.00062461	10	11	1.52224e-05	24	25	7.08212e-06	985	986	0.000213064	NA	NA	NA	NA	NA
GSYFGYSL	GGGAGCTATTTTGGGTATTCACTC	WT	1081	1082	0.000290787	330	331	0.000244694	1652	1653	0.00026431	NA	NA	NA	NA	NA	NA	NA	NA	NA	555	556	0.000118189	266	267	0.000123615	96	97	0.000121387	141	142	7.64179e-05	247	248	0.000123626	154	155	0.000214498	111	112	3.17279e-05	74	75	1.62067e-05	NA	NA	NA	NA	NA
GSYIMNYI	GGTTCATACATAATGAACTACATC	WT	1337	1338	0.000359587	427	428	0.000316401	2221	2222	0.000355291	NA	NA	NA	NA	NA	NA	NA	NA	NA	817	818	0.000173883	388	389	0.000180098	134	135	0.000168941	83	84	4.5205e-05	75	76	3.78854e-05	1962	1963	0.00271651	63	64	1.81302e-05	796	797	0.000172223	NA	NA	NA	NA	NA
GSYIYLSM	GGCTCTTACATCTACCTATCGATG	WT	72	73	1.96187e-05	43	44	3.25272e-05	147	148	2.36648e-05	NA	NA	NA	NA	NA	NA	NA	NA	NA	38	39	8.29025e-06	29	30	1.38893e-05	11	12	1.5017e-05	251	252	0.000135615	2	3	1.49547e-06	NA	1	1.38386e-06	6	7	1.98299e-06	391	392	8.47071e-05	NA	NA	NA	NA	NA
GSYWYFDV	GGATCGTATTGGTACTTCGATGTG	WT	363	364	9.7825e-05	87	88	6.50545e-05	453	454	7.25933e-05	NA	NA	NA	NA	NA	NA	NA	NA	NA	156	157	3.33736e-05	74	75	3.47232e-05	32	33	4.12966e-05	13	14	7.53416e-06	34	35	1.74472e-05	150	151	0.000208962	2	3	8.49855e-07	541	542	0.000117121	NA	NA	NA	NA	NA
GTALYNNL	GGGACAGCGTTGTACAACAACTTG	WT	447	448	0.0001204	171	172	0.000127152	854	855	0.000136712	NA	NA	NA	NA	NA	NA	NA	NA	NA	276	277	5.8882e-05	109	110	5.09274e-05	53	54	6.75763e-05	152	153	8.23376e-05	6	7	3.48944e-06	58	59	8.16475e-05	1	2	5.6657e-07	69	70	1.51263e-05	NA	NA	NA	NA	NA
GTILFMYL	GGGACGATTTTGTTTATGTATTTG	WT	958	959	0.000257731	354	355	0.000262436	1835	1836	0.000293571	NA	NA	NA	NA	NA	NA	NA	NA	NA	662	663	0.000140934	286	287	0.000132874	112	113	0.00014141	226	227	0.000122161	226	227	0.000113158	57	58	8.02636e-05	1347	1348	0.000381868	299	300	6.48269e-05	NA	NA	NA	NA	NA
GTISFFEI	GGAACGATAAGTTTCTTCGAGATA	WT	243	244	6.5575e-05	74	75	5.54442e-05	351	352	5.62838e-05	NA	NA	NA	NA	NA	NA	NA	NA	NA	136	137	2.91221e-05	66	67	3.10194e-05	23	24	3.00339e-05	3	4	2.15262e-06	3023	3024	0.00150744	7	8	1.10708e-05	44	45	1.27478e-05	34	35	7.56313e-06	NA	NA	NA	NA	NA
GTLEFTLL	GGCACACTTGAATTTACACTCTTA	WT	663	664	0.00017845	259	260	0.000192206	1064	1065	0.00017029	NA	NA	NA	NA	NA	NA	NA	NA	NA	397	398	8.4603e-05	197	198	9.16693e-05	78	79	9.88616e-05	1097	1098	0.000590893	146	147	7.32783e-05	8	9	1.24547e-05	1355	1356	0.000384134	1188	1189	0.00025693	NA	NA	NA	NA	NA
GTLIYMYM	GGAACACTTATATACATGTATATG	WT	407	408	0.00010965	153	154	0.000113845	609	610	9.75372e-05	NA	NA	NA	NA	NA	NA	NA	NA	NA	275	276	5.86694e-05	134	135	6.25018e-05	41	42	5.25593e-05	178	179	9.63296e-05	34	35	1.74472e-05	2	3	4.15157e-06	1110	1111	0.00031473	1094	1095	0.000236618	NA	NA	NA	NA	NA
GTLNFTNV	GGAACTCTCAACTTTACCAATGTC	WT	282	283	7.60562e-05	87	88	6.50545e-05	453	454	7.25933e-05	NA	NA	NA	NA	NA	NA	NA	NA	NA	188	189	4.01758e-05	80	81	3.75011e-05	34	35	4.37994e-05	41	42	2.26025e-05	1	2	9.96983e-07	3	4	5.53542e-06	6	7	1.98299e-06	5	6	1.29654e-06	NA	NA	NA	NA	NA
GTLTFMYI	GGCACCCTGACATTTATGTACATA	WT	863	864	0.0002322	349	350	0.000258739	1844	1845	0.00029501	NA	NA	NA	NA	NA	NA	NA	NA	NA	615	616	0.000130943	232	233	0.000107873	119	120	0.00015017	97	98	5.27391e-05	1604	1605	0.000800079	340	341	0.000471895	1009	1010	0.000286118	497	498	0.000107613	NA	NA	NA	NA	NA
GTPRFFPL	GGGACGCCGCGGTTCTTCCCGCTT	WT	60	61	1.63937e-05	8	9	6.6533e-06	72	73	1.16725e-05	NA	NA	NA	NA	NA	NA	NA	NA	NA	24	25	5.31426e-06	15	16	7.40762e-06	8	9	1.12627e-05	1	2	1.07631e-06	NA	1	4.98492e-07	NA	1	1.38386e-06	99	100	2.83285e-05	NA	1	2.1609e-07	NA	NA	NA	NA	NA
GTYILQTL	GGAACTTACATATTACAAACGCTG	WT	149	150	4.03125e-05	94	95	7.02293e-05	333	334	5.34056e-05	NA	NA	NA	NA	NA	NA	NA	NA	NA	105	106	2.25325e-05	54	55	2.54637e-05	23	24	3.00339e-05	NA	1	5.38154e-07	57	58	2.89125e-05	67	68	9.41021e-05	NA	1	2.83285e-07	44	45	9.72403e-06	NA	NA	NA	NA	NA
GTYKYLEV	GGGACGTACAAATACCTAGAAGTC	WT	328	329	8.84187e-05	158	159	0.000117542	621	622	9.9456e-05	NA	NA	NA	NA	NA	NA	NA	NA	NA	225	226	4.80409e-05	93	94	4.35197e-05	37	38	4.75537e-05	1	2	1.07631e-06	56	57	2.8414e-05	1	2	2.76771e-06	127	128	3.62605e-05	1050	1051	0.00022711	NA	NA	NA	NA	NA
GVFVWTAL	GGGGTTTTCGTTTGGACAGCATTG	WT	79	80	2.15e-05	25	26	1.92206e-05	98	99	1.58298e-05	NA	NA	NA	NA	NA	NA	NA	NA	NA	78	79	1.67931e-05	40	41	1.8982e-05	11	12	1.5017e-05	NA	1	5.38154e-07	15	16	7.97587e-06	NA	1	1.38386e-06	127	128	3.62605e-05	3	4	8.64358e-07	NA	NA	NA	NA	NA
GVIHFLEL	GGTGTAATACATTTTCTGGAACTG	WT	590	591	0.000158831	170	171	0.000126413	956	957	0.000153022	NA	NA	NA	NA	NA	NA	NA	NA	NA	381	382	8.12019e-05	133	134	6.20388e-05	70	71	8.88503e-05	406	407	0.000219029	393	394	0.000196406	78	79	0.000109325	138	139	3.93766e-05	1900	1901	0.000410786	NA	NA	NA	NA	NA
GVILFLRL	GGCGTGATACTATTCCTCAGGTTA	WT	155	156	4.1925e-05	59	60	4.43553e-05	255	256	4.09337e-05	NA	NA	NA	NA	NA	NA	NA	NA	NA	88	89	1.89188e-05	54	55	2.54637e-05	19	20	2.50283e-05	156	157	8.44902e-05	3	4	1.99397e-06	381	382	0.000528633	479	480	0.000135977	21	22	4.75397e-06	NA	NA	NA	NA	NA
GVMALANL	GGGGTGATGGCGCTGGCTAACCTA	WT	381	382	0.000102662	131	132	9.75817e-05	666	667	0.000106651	NA	NA	NA	NA	NA	NA	NA	NA	NA	223	224	4.76158e-05	88	89	4.12049e-05	39	40	5.00565e-05	120	121	6.51167e-05	9	10	4.98492e-06	2	3	4.15157e-06	45	46	1.30311e-05	96	97	2.09607e-05	NA	NA	NA	NA	NA
GVYGFLTF	GGCGTTTATGGATTCCTTACATTT	WT	1596	1597	0.000429194	615	616	0.000455381	2419	2420	0.000386951	NA	NA	NA	NA	NA	NA	NA	NA	NA	944	945	0.000200879	489	490	0.000226858	149	150	0.000187712	255	256	0.000137768	200	201	0.000100197	492	493	0.000682241	882	883	0.000250141	489	490	0.000105884	NA	NA	NA	NA	NA
GVYHLSGL	GGCGTCTACCACTTGTCAGGGTTA	WT	755	756	0.000203175	314	315	0.000232866	1581	1582	0.000252957	NA	NA	NA	NA	NA	NA	NA	NA	NA	570	571	0.000121378	234	235	0.000108799	80	81	0.000101364	41	42	2.26025e-05	181	182	9.07255e-05	1	2	2.76771e-06	348	349	9.88664e-05	771	772	0.000166821	NA	NA	NA	NA	NA
GVYSAAAL	GGGGTGTATAGTGCTGCCGCTCTG	WT	347	348	9.3525e-05	121	122	9.01892e-05	834	835	0.000133514	NA	NA	NA	NA	NA	NA	NA	NA	NA	269	270	5.7394e-05	120	121	5.60201e-05	43	44	5.50622e-05	522	523	0.000281455	124	125	6.23114e-05	NA	1	1.38386e-06	29	30	8.49855e-06	570	571	0.000123387	NA	NA	NA	NA	NA
GVYTHHPL	GGGGTGTACACCCACCATCCGTTG	WT	366	367	9.86312e-05	140	141	0.000104235	668	669	0.000106971	NA	NA	NA	NA	NA	NA	NA	NA	NA	260	261	5.54809e-05	98	99	4.58346e-05	35	36	4.50509e-05	48	49	2.63696e-05	124	125	6.23114e-05	1	2	2.76771e-06	1	2	5.6657e-07	18	19	4.1057e-06	NA	NA	NA	NA	NA
GYFQFRLV	GGGTACTTCCAGTTTCGGCTTGTT	WT	906	907	0.000243756	320	321	0.000237301	1615	1616	0.000258394	NA	NA	NA	NA	NA	NA	NA	NA	NA	565	566	0.000120315	277	278	0.000128707	102	103	0.000128895	15	16	8.61047e-06	35	36	1.79457e-05	50	51	7.05766e-05	877	878	0.000248724	1478	1479	0.000319596	NA	NA	NA	NA	NA
GYQFLSQL	GGGTATCAATTCTTATCTCAACTA	WT	406	407	0.000109381	123	124	9.16677e-05	739	740	0.000118324	NA	NA	NA	NA	NA	NA	NA	NA	NA	246	247	5.25049e-05	115	116	5.37052e-05	45	46	5.7565e-05	17	18	9.68678e-06	8	9	4.48642e-06	1	2	2.76771e-06	10	11	3.11613e-06	577	578	0.0001249	NA	NA	NA	NA	NA
GYRYYTCL	GGGTATCGGTATTACACATGTCTG	WT	1155	1156	0.000310675	441	442	0.000326751	2201	2202	0.000352093	NA	NA	NA	NA	NA	NA	NA	NA	NA	721	722	0.000153476	350	351	0.000162505	133	134	0.000167689	292	293	0.000157679	91	92	4.58612e-05	1	2	2.76771e-06	14	15	4.24927e-06	514	515	0.000111286	NA	NA	NA	NA	NA
GYYFFIVL	GGATACTACTTCTTTATCGTATTA	WT	1103	1104	0.0002967	338	339	0.000250608	1530	1531	0.000244802	NA	NA	NA	NA	NA	NA	NA	NA	NA	586	587	0.000124779	298	299	0.00013843	114	115	0.000143912	122	123	6.6193e-05	391	392	0.000195409	44	45	6.22735e-05	846	847	0.000239942	1769	1770	0.000382478	NA	NA	NA	NA	NA
HAEFFRNL	CACGCCGAATTCTTTCGCAACTTG	WT	694	695	0.000186781	213	214	0.000158201	1206	1207	0.000192996	NA	NA	NA	NA	NA	NA	NA	NA	NA	416	417	8.86419e-05	222	223	0.000103244	82	83	0.000103867	48	49	2.63696e-05	4803	4804	0.00239475	173	174	0.000240791	61	62	1.75637e-05	530	531	0.000114744	NA	NA	NA	NA	NA
HAYTLRML	CATGCATACACGCTAAGGATGCTA	WT	249	250	6.71875e-05	108	109	8.05789e-05	568	569	9.09815e-05	NA	NA	NA	NA	NA	NA	NA	NA	NA	188	189	4.01758e-05	80	81	3.75011e-05	30	31	3.87938e-05	72	73	3.92853e-05	7	8	3.98793e-06	9	10	1.38386e-05	58	59	1.67138e-05	320	321	6.93647e-05	NA	NA	NA	NA	NA
HAYYYCFI	CACGCGTATTATTATTGCTTCATC	WT	632	633	0.000170119	236	237	0.000175204	1105	1106	0.000176846	NA	NA	NA	NA	NA	NA	NA	NA	NA	362	363	7.71631e-05	159	160	7.40762e-05	66	67	8.38446e-05	211	212	0.000114089	9	10	4.98492e-06	21	22	3.04448e-05	172	173	4.90083e-05	894	895	0.0001934	NA	NA	NA	NA	NA
HFFFSNPL	CACTTCTTCTTCAGCAACCCGTTG	WT	149	150	4.03125e-05	49	50	3.69628e-05	233	234	3.74159e-05	NA	NA	NA	NA	NA	NA	NA	NA	NA	99	100	2.1257e-05	52	53	2.45377e-05	21	22	2.75311e-05	2	3	1.61446e-06	NA	1	4.98492e-07	NA	1	1.38386e-06	138	139	3.93766e-05	1	2	4.32179e-07	NA	NA	NA	NA	NA
HFFRFLGL	CATTTCTTCCGGTTCCTAGGGTTG	WT	205	206	5.53625e-05	96	97	7.17078e-05	370	371	5.93218e-05	NA	NA	NA	NA	NA	NA	NA	NA	NA	117	118	2.50833e-05	76	77	3.56492e-05	21	22	2.75311e-05	36	37	1.99117e-05	46	47	2.34291e-05	1	2	2.76771e-06	95	96	2.71954e-05	140	141	3.04686e-05	NA	NA	NA	NA	NA
HFYSLSYL	CATTTCTACAGCTTGTCCTACCTT	WT	508	509	0.000136794	177	178	0.000131588	820	821	0.000131276	NA	NA	NA	NA	NA	NA	NA	NA	NA	290	291	6.1858e-05	131	132	6.11128e-05	50	51	6.3822e-05	121	122	6.56548e-05	395	396	0.000197403	6	7	9.68699e-06	4	5	1.41642e-06	103	104	2.24733e-05	NA	NA	NA	NA	NA
HGLFWANL	CACGGACTGTTCTGGGCTAATTTA	WT	124	125	3.35937e-05	44	45	3.32665e-05	265	266	4.25326e-05	NA	NA	NA	NA	NA	NA	NA	NA	NA	97	98	2.08319e-05	45	46	2.12969e-05	10	11	1.37655e-05	9	10	5.38154e-06	38	39	1.94412e-05	NA	1	1.38386e-06	11	12	3.39942e-06	1833	1834	0.000396308	NA	NA	NA	NA	NA
HGLIFLPV	CATGGGCTCATCTTCTTGCCCGTC	WT	279	280	7.525e-05	88	89	6.57938e-05	547	548	8.76236e-05	NA	NA	NA	NA	NA	NA	NA	NA	NA	167	168	3.57118e-05	79	80	3.70381e-05	26	27	3.37881e-05	62	63	3.39037e-05	10	11	5.48341e-06	NA	1	1.38386e-06	31	32	9.06512e-06	12	13	2.80916e-06	NA	NA	NA	NA	NA
HGLVFLPV	CATGGTCTTGTCTTCCTCCCTGTG	WT	776	777	0.000208819	256	257	0.000189989	1472	1473	0.000235528	NA	NA	NA	NA	NA	NA	NA	NA	NA	542	543	0.000115426	225	226	0.000104633	82	83	0.000103867	246	247	0.000132924	15	16	7.97587e-06	80	81	0.000112092	38	39	1.10481e-05	722	723	0.000156233	NA	NA	NA	NA	NA
HGVSYFRL	CATGGAGTCTCGTATTTTCGCCTC	WT	144	145	3.89687e-05	57	58	4.28768e-05	279	280	4.47712e-05	NA	NA	NA	NA	NA	NA	NA	NA	NA	101	102	2.16822e-05	58	59	2.73156e-05	19	20	2.50283e-05	4	5	2.69077e-06	37	38	1.89427e-05	44	45	6.22735e-05	NA	1	2.83285e-07	1	2	4.32179e-07	NA	NA	NA	NA	NA
HGYAFLNT	CACGGCTACGCCTTTCTTAACACG	WT	463	464	0.0001247	66	67	4.95301e-05	619	620	9.91362e-05	NA	NA	NA	NA	NA	NA	NA	NA	NA	267	268	5.69689e-05	100	101	4.67606e-05	32	33	4.12966e-05	83	84	4.5205e-05	593	594	0.000296104	3	4	5.53542e-06	7	8	2.26628e-06	131	132	2.85238e-05	NA	NA	NA	NA	NA
HGYEYPKV	CATGGTTATGAATATCCTAAAGTA	WT	1850	1851	0.000497456	759	760	0.000561834	3684	3685	0.000589221	NA	NA	NA	NA	NA	NA	NA	NA	NA	1162	1163	0.000247219	544	545	0.000252322	213	214	0.000267802	2272	2273	0.00122322	261	262	0.000130605	1269	1270	0.0017575	420	421	0.000119263	443	444	9.59437e-05	NA	NA	NA	NA	NA
HIFRYLPL	CACATCTTTCGGTACTTACCATTG	WT	326	327	8.78812e-05	111	112	8.27966e-05	607	608	9.72174e-05	NA	NA	NA	NA	NA	NA	NA	NA	NA	200	201	4.27266e-05	87	88	4.07419e-05	36	37	4.63023e-05	74	75	4.03616e-05	4	5	2.49246e-06	24	25	3.45964e-05	17	18	5.09913e-06	859	860	0.000185837	NA	NA	NA	NA	NA
HILYFRHL	CATATTCTGTACTTTCGACATTTA	WT	1163	1164	0.000312825	454	455	0.000336361	1870	1871	0.000299167	NA	NA	NA	NA	NA	NA	NA	NA	NA	732	733	0.000155814	326	327	0.000151393	118	119	0.000148918	381	382	0.000205575	852	853	0.000425213	504	505	0.000698847	254	255	7.22377e-05	134	135	2.91721e-05	NA	NA	NA	NA	NA
HLLHFLPL	CATTTGCTGCACTTCTTGCCTTTA	WT	508	509	0.000136794	165	166	0.000122716	678	679	0.00010857	NA	NA	NA	NA	NA	NA	NA	NA	NA	266	267	5.67563e-05	112	113	5.23163e-05	38	39	4.88051e-05	17	18	9.68678e-06	46	47	2.34291e-05	16	17	2.35255e-05	1099	1100	0.000311613	636	637	0.000137649	NA	NA	NA	NA	NA
HLYNLVHL	CATTTGTATAATCTCGTGCACTTG	WT	378	379	0.000101856	126	127	9.38855e-05	637	638	0.000102014	NA	NA	NA	NA	NA	NA	NA	NA	NA	257	258	5.48432e-05	111	112	5.18533e-05	39	40	5.00565e-05	11	12	6.45785e-06	144	145	7.22813e-05	6	7	9.68699e-06	262	263	7.45039e-05	5	6	1.29654e-06	NA	NA	NA	NA	NA
HMQFFQHL	CACATGCAATTCTTTCAACATCTT	WT	1194	1195	0.000321156	435	436	0.000322315	2217	2218	0.000354652	NA	NA	NA	NA	NA	NA	NA	NA	NA	864	865	0.000183873	353	354	0.000163894	143	144	0.000180203	522	523	0.000281455	220	221	0.000110167	79	80	0.000110708	5599	5600	0.0015864	2661	2662	0.00057523	NA	NA	NA	NA	NA
HQYLYQYL	CACCAATACCTTTATCAGTATTTG	WT	815	816	0.0002193	309	310	0.000229169	1289	1290	0.000206267	NA	NA	NA	NA	NA	NA	NA	NA	NA	459	460	9.77824e-05	237	238	0.000110188	73	74	9.26045e-05	181	182	9.79441e-05	267	268	0.000133596	118	119	0.000164679	393	394	0.000111614	583	584	0.000126196	NA	NA	NA	NA	NA
HSFRFSEI	CACTCATTCCGTTTCTCGGAGATT	WT	224	225	6.04687e-05	68	69	5.10086e-05	379	380	6.07609e-05	NA	NA	NA	NA	NA	NA	NA	NA	NA	132	133	2.82719e-05	65	66	3.05564e-05	24	25	3.12853e-05	51	52	2.7984e-05	231	232	0.00011565	85	86	0.000119012	4	5	1.41642e-06	468	469	0.000101346	NA	NA	NA	NA	NA
HSFRVYDL	CACTCATTTAGGGTCTATGATCTG	WT	248	249	6.69187e-05	95	96	7.09685e-05	450	451	7.21136e-05	NA	NA	NA	NA	NA	NA	NA	NA	NA	176	177	3.7625e-05	62	63	2.91675e-05	25	26	3.25367e-05	19	20	1.07631e-05	2	3	1.49547e-06	36	37	5.12026e-05	46	47	1.33144e-05	1336	1337	0.000288912	NA	NA	NA	NA	NA
HSFSFHGA	CATAGCTTTTCATTTCATGGAGCT	WT	741	742	0.000199412	288	289	0.000213645	1525	1526	0.000244003	NA	NA	NA	NA	NA	NA	NA	NA	NA	575	576	0.000122441	271	272	0.000125929	62	63	7.8839e-05	89	90	4.84339e-05	94	95	4.73567e-05	18	19	2.62932e-05	204	205	5.80734e-05	70	71	1.53424e-05	NA	NA	NA	NA	NA
HSHLFIRL	CATTCTCACCTGTTCATACGACTC	WT	386	387	0.000104006	147	148	0.00010941	700	701	0.000112088	NA	NA	NA	NA	NA	NA	NA	NA	NA	283	284	6.037e-05	120	121	5.60201e-05	45	46	5.7565e-05	47	48	2.58314e-05	51	52	2.59216e-05	1	2	2.76771e-06	1497	1498	0.000424361	61	62	1.33975e-05	NA	NA	NA	NA	NA
HSIVYTQI	CACTCTATTGTCTACACTCAAATA	WT	900	901	0.000242144	399	400	0.000295702	1612	1613	0.000257914	NA	NA	NA	NA	NA	NA	NA	NA	NA	684	685	0.000145611	257	258	0.000119448	96	97	0.000121387	255	256	0.000137768	56	57	2.8414e-05	220	221	0.000305832	1285	1286	0.000364304	96	97	2.09607e-05	NA	NA	NA	NA	NA
HSLAWTAL	CATTCCCTGGCATGGACGGCACTT	WT	386	387	0.000104006	137	138	0.000102017	638	639	0.000102174	NA	NA	NA	NA	NA	NA	NA	NA	NA	251	252	5.35677e-05	109	110	5.09274e-05	32	33	4.12966e-05	210	211	0.000113551	3794	3795	0.00189178	2	3	4.15157e-06	26	27	7.64869e-06	84	85	1.83676e-05	NA	NA	NA	NA	NA
HSLLFMRL	CACTCGTTACTATTTATGAGACTA	WT	NA	1	2.6875e-07	NA	1	7.39256e-07	NA	1	1.59897e-07	NA	NA	NA	NA	NA	NA	NA	NA	NA	NA	1	2.1257e-07	NA	1	4.62976e-07	NA	1	1.25141e-06	NA	1	5.38154e-07	NA	1	4.98492e-07	NA	1	1.38386e-06	NA	1	2.83285e-07	NA	1	2.1609e-07	NA	NA	NA	NA	NA
HSMFLMSL	CATTCCATGTTCTTGATGAGTTTG	WT	795	796	0.000213925	309	310	0.000229169	1487	1488	0.000237927	NA	NA	NA	NA	NA	NA	NA	NA	NA	574	575	0.000122228	255	256	0.000118522	112	113	0.00014141	14	15	8.07232e-06	211	212	0.00010568	12	13	1.79901e-05	57	58	1.64305e-05	1817	1818	0.000392851	NA	NA	NA	NA	NA
HSWHVAKL	CACTCCTGGCATGTCGCTAAGCTT	WT	185	186	4.99875e-05	66	67	4.95301e-05	332	333	5.32457e-05	NA	NA	NA	NA	NA	NA	NA	NA	NA	97	98	2.08319e-05	38	39	1.80561e-05	25	26	3.25367e-05	133	134	7.21127e-05	69	70	3.48944e-05	13	14	1.9374e-05	2	3	8.49855e-07	9	10	2.1609e-06	NA	NA	NA	NA	NA
HSYCRMFL	CACAGTTACTGCAGGATGTTCCTA	WT	947	948	0.000254775	394	395	0.000292006	1719	1720	0.000275023	NA	NA	NA	NA	NA	NA	NA	NA	NA	662	663	0.000140934	271	272	0.000125929	146	147	0.000183958	1100	1101	0.000592508	444	445	0.000221829	81	82	0.000113476	152	153	4.33426e-05	157	158	3.41421e-05	NA	NA	NA	NA	NA
HTFRHTLL	CATACGTTCCGCCATACCCTCTTA	WT	NA	1	2.6875e-07	NA	1	7.39256e-07	NA	1	1.59897e-07	NA	NA	NA	NA	NA	NA	NA	NA	NA	NA	1	2.1257e-07	NA	1	4.62976e-07	NA	1	1.25141e-06	NA	1	5.38154e-07	NA	1	4.98492e-07	NA	1	1.38386e-06	NA	1	2.83285e-07	NA	1	2.1609e-07	NA	NA	NA	NA	NA
HTQPFASL	CACACCCAGCCATTCGCATCACTA	WT	90	91	2.44562e-05	34	35	2.58739e-05	232	233	3.7256e-05	NA	NA	NA	NA	NA	NA	NA	NA	NA	58	59	1.25417e-05	21	22	1.01855e-05	5	6	7.50848e-06	5	6	3.22893e-06	4	5	2.49246e-06	1	2	2.76771e-06	2	3	8.49855e-07	39	40	8.64358e-06	NA	NA	NA	NA	NA
HVISYYHV	CATGTAATCTCCTATTATCATGTC	WT	835	836	0.000224675	315	316	0.000233605	1318	1319	0.000210904	NA	NA	NA	NA	NA	NA	NA	NA	NA	493	494	0.00010501	224	225	0.00010417	103	104	0.000130147	668	669	0.000360025	13	14	6.97888e-06	49	50	6.91928e-05	386	387	0.000109631	323	324	7.0013e-05	NA	NA	NA	NA	NA
HVLHFFHI	CATGTTCTACATTTCTTCCACATT	WT	927	928	0.0002494	295	296	0.00021882	1398	1399	0.000223696	NA	NA	NA	NA	NA	NA	NA	NA	NA	531	532	0.000113087	269	270	0.000125004	103	104	0.000130147	244	245	0.000131848	1265	1266	0.00063109	188	189	0.000261549	610	611	0.000173087	488	489	0.000105668	NA	NA	NA	NA	NA
HVYRYFSY	CACGTATACAGATACTTTAGCTAC	WT	492	493	0.000132494	135	136	0.000100539	673	674	0.000107771	NA	NA	NA	NA	NA	NA	NA	NA	NA	189	190	4.03884e-05	112	113	5.23163e-05	36	37	4.63023e-05	93	94	5.05865e-05	139	140	6.97888e-05	3	4	5.53542e-06	2	3	8.49855e-07	1237	1238	0.000267519	NA	NA	NA	NA	NA
IAAEFLFV	ATAGCTGCGGAGTTCCTTTTCGTG	WT	208	209	5.61687e-05	69	70	5.17479e-05	355	356	5.69234e-05	NA	NA	NA	NA	NA	NA	NA	NA	NA	151	152	3.23107e-05	65	66	3.05564e-05	30	31	3.87938e-05	42	43	2.31406e-05	24	25	1.24623e-05	7	8	1.10708e-05	138	139	3.93766e-05	17	18	3.88961e-06	NA	NA	NA	NA	NA
IAALMSFL	ATTGCAGCATTAATGTCCTTCTTG	WT	1228	1229	0.000330294	424	425	0.000314184	1885	1886	0.000301566	NA	NA	NA	NA	NA	NA	NA	NA	NA	752	753	0.000160066	339	340	0.000157412	128	129	0.000161432	1226	1227	0.000660315	83	84	4.18733e-05	14	15	2.07578e-05	423	424	0.000120113	655	656	0.000141755	NA	NA	NA	NA	NA
IAASYGNV	ATCGCAGCGAGCTACGGAAACGTA	WT	31	32	8.6e-06	12	13	9.61032e-06	88	89	1.42308e-05	NA	NA	NA	NA	NA	NA	NA	NA	NA	13	14	2.97599e-06	7	8	3.70381e-06	1	2	2.50283e-06	NA	1	5.38154e-07	NA	1	4.98492e-07	NA	1	1.38386e-06	15	16	4.53256e-06	NA	1	2.1609e-07	NA	NA	NA	NA	NA
IAAVMAFL	ATTGCTGCTGTGATGGCCTTTCTG	WT	203	204	5.4825e-05	70	71	5.24872e-05	366	367	5.86822e-05	NA	NA	NA	NA	NA	NA	NA	NA	NA	137	138	2.93347e-05	53	54	2.50007e-05	18	19	2.37768e-05	111	112	6.02733e-05	206	207	0.000103188	NA	1	1.38386e-06	13	14	3.96599e-06	NA	1	2.1609e-07	NA	NA	NA	NA	NA
IADQFHRL	ATAGCCGACCAATTCCATAGACTG	WT	472	473	0.000127119	206	207	0.000153026	1176	1177	0.000188199	NA	NA	NA	NA	NA	NA	NA	NA	NA	319	320	6.80225e-05	147	148	6.85205e-05	57	58	7.25819e-05	9	10	5.38154e-06	3781	3782	0.0018853	8	9	1.24547e-05	449	450	0.000127478	3713	3714	0.000802556	NA	NA	NA	NA	NA
IAESYQNI	ATAGCCGAGTCATATCAGAATATC	WT	937	938	0.000252087	331	332	0.000245433	1425	1426	0.000228013	NA	NA	NA	NA	NA	NA	NA	NA	NA	564	565	0.000120102	203	204	9.44471e-05	100	101	0.000126393	206	207	0.000111398	310	311	0.000155031	69	70	9.68699e-05	925	926	0.000262322	1047	1048	0.000226462	NA	NA	NA	NA	NA
IAEYFVPL	ATTGCAGAATACTTTGTTCCGTTA	WT	423	424	0.00011395	144	145	0.000107192	633	634	0.000101375	NA	NA	NA	NA	NA	NA	NA	NA	NA	285	286	6.07951e-05	122	123	5.69461e-05	50	51	6.3822e-05	122	123	6.6193e-05	88	89	4.43657e-05	6	7	9.68699e-06	5	6	1.69971e-06	28	29	6.2666e-06	NA	NA	NA	NA	NA
IAFCALLL	ATCGCGTTCTGTGCATTGCTGCTA	WT	1073	1074	0.000288637	391	392	0.000289788	1773	1774	0.000283657	NA	NA	NA	NA	NA	NA	NA	NA	NA	649	650	0.000138171	310	311	0.000143986	95	96	0.000120136	360	361	0.000194274	41	42	2.09366e-05	160	161	0.000222801	1202	1203	0.000340792	2118	2119	0.000457894	NA	NA	NA	NA	NA
IAFCVAQF	ATAGCCTTTTGCGTAGCGCAATTC	WT	270	271	7.28312e-05	72	73	5.39657e-05	247	248	3.96545e-05	NA	NA	NA	NA	NA	NA	NA	NA	NA	152	153	3.25233e-05	50	51	2.36118e-05	18	19	2.37768e-05	33	34	1.82972e-05	5	6	2.99095e-06	NA	1	1.38386e-06	9	10	2.83285e-06	451	452	9.76725e-05	NA	NA	NA	NA	NA
IAFETWEI	ATCGCATTTGAAACCTGGGAGATT	WT	499	500	0.000134375	174	175	0.00012937	927	928	0.000148385	NA	NA	NA	NA	NA	NA	NA	NA	NA	344	345	7.33368e-05	141	142	6.57426e-05	40	41	5.13079e-05	1203	1204	0.000647938	140	141	7.02873e-05	2	3	4.15157e-06	200	201	5.69403e-05	56	57	1.23171e-05	NA	NA	NA	NA	NA
IAFFYNRS	ATAGCCTTCTTCTATAATCGGAGT	WT	695	696	0.00018705	258	259	0.000191467	1071	1072	0.00017141	NA	NA	NA	NA	NA	NA	NA	NA	NA	370	371	7.88636e-05	192	193	8.93544e-05	94	95	0.000118884	834	835	0.000449359	17	18	8.97285e-06	10	11	1.52224e-05	149	150	4.24927e-05	70	71	1.53424e-05	NA	NA	NA	NA	NA
IAFHYKHS	ATTGCTTTTCACTACAAGCACAGT	WT	1160	1161	0.000312019	409	410	0.000303095	2006	2007	0.000320913	NA	NA	NA	NA	NA	NA	NA	NA	NA	666	667	0.000141784	324	325	0.000150467	108	109	0.000136404	176	177	9.52533e-05	716	717	0.000357418	47	48	6.6425e-05	355	356	0.000100849	1374	1375	0.000297123	NA	NA	NA	NA	NA
IAFNYILA	ATAGCATTCAACTATATTTTAGCC	WT	443	444	0.000119325	166	167	0.000123456	864	865	0.000138311	NA	NA	NA	NA	NA	NA	NA	NA	NA	307	308	6.54717e-05	164	165	7.6391e-05	47	48	6.00678e-05	20	21	1.13012e-05	76	77	3.83839e-05	18	19	2.62932e-05	4	5	1.41642e-06	239	240	5.18615e-05	NA	NA	NA	NA	NA
IAFSLWIV	ATTGCATTCTCCCTCTGGATCGTT	WT	1446	1447	0.000388881	552	553	0.000408808	2525	2526	0.0004039	NA	NA	NA	NA	NA	NA	NA	NA	NA	921	922	0.00019599	388	389	0.000180098	154	155	0.000193969	437	438	0.000235712	264	265	0.0001321	13	14	1.9374e-05	1736	1737	0.000492066	1880	1881	0.000406464	NA	NA	NA	NA	NA
IAFTFTCF	ATAGCGTTTACTTTTACGTGCTTT	WT	930	931	0.000250206	299	300	0.000221777	1588	1589	0.000254076	NA	NA	NA	NA	NA	NA	NA	NA	NA	557	558	0.000118614	288	289	0.0001338	124	125	0.000156427	659	660	0.000355182	12	13	6.48039e-06	11	12	1.66063e-05	2818	2819	0.00079858	671	672	0.000145212	NA	NA	NA	NA	NA
IAFTYNPR	ATAGCGTTTACCTATAATCCCCGA	WT	368	369	9.91687e-05	106	107	7.91004e-05	591	592	9.46591e-05	NA	NA	NA	NA	NA	NA	NA	NA	NA	180	181	3.84752e-05	106	107	4.95384e-05	36	37	4.63023e-05	212	213	0.000114627	24	25	1.24623e-05	1747	1748	0.00241898	8	9	2.54956e-06	15	16	3.45743e-06	NA	NA	NA	NA	NA
IAFVVFLV	ATTGCCTTCGTGGTCTTTCTGGTT	WT	1862	1863	0.000500681	600	601	0.000444293	2943	2944	0.000470737	NA	NA	NA	NA	NA	NA	NA	NA	NA	1081	1082	0.000230001	534	535	0.000247692	196	197	0.000246528	563	564	0.000303519	641	642	0.000320032	1114	1115	0.001543	2415	2416	0.000684416	1674	1675	0.00036195	NA	NA	NA	NA	NA
IAHRYNDL	ATAGCCCATCGGTACAATGATCTT	WT	675	676	0.000181675	289	290	0.000214384	1178	1179	0.000188519	NA	NA	NA	NA	NA	NA	NA	NA	NA	464	465	9.88452e-05	193	194	8.98174e-05	60	61	7.63362e-05	68	69	3.71326e-05	27	28	1.39578e-05	3	4	5.53542e-06	72	73	2.06798e-05	537	538	0.000116256	NA	NA	NA	NA	NA
IAIAIPML	ATCGCAATCGCAATCCCGATGTTG	WT	545	546	0.000146737	254	255	0.00018851	1145	1146	0.000183242	NA	NA	NA	NA	NA	NA	NA	NA	NA	451	452	9.60818e-05	187	188	8.70395e-05	64	65	8.13418e-05	46	47	2.52933e-05	5	6	2.99095e-06	137	138	0.000190972	3456	3457	0.000979316	112	113	2.44181e-05	NA	NA	NA	NA	NA
IAIDVAFL	ATAGCCATAGACGTTGCATTTCTA	WT	165	166	4.46125e-05	66	67	4.95301e-05	406	407	6.50781e-05	NA	NA	NA	NA	NA	NA	NA	NA	NA	119	120	2.55084e-05	55	56	2.59267e-05	24	25	3.12853e-05	2	3	1.61446e-06	8	9	4.48642e-06	1	2	2.76771e-06	1711	1712	0.000484984	15	16	3.45743e-06	NA	NA	NA	NA	NA
IAILARYM	ATAGCTATATTGGCGCGATATATG	WT	174	175	4.70312e-05	71	72	5.32264e-05	321	322	5.14869e-05	NA	NA	NA	NA	NA	NA	NA	NA	NA	104	105	2.23199e-05	51	52	2.40748e-05	29	30	3.75424e-05	7	8	4.30523e-06	6	7	3.48944e-06	3	4	5.53542e-06	NA	1	2.83285e-07	2	3	6.48269e-07	NA	NA	NA	NA	NA
IAKRLFHL	ATTGCTAAGAGGCTCTTTCACCTA	WT	610	611	0.000164206	254	255	0.00018851	1179	1180	0.000188679	NA	NA	NA	NA	NA	NA	NA	NA	NA	459	460	9.77824e-05	212	213	9.86139e-05	64	65	8.13418e-05	2849	2850	0.00153374	164	165	8.22511e-05	67	68	9.41021e-05	3109	3110	0.000881016	628	629	0.00013592	NA	NA	NA	NA	NA
IALCFPTL	ATCGCGCTATGCTTTCCGACGCTC	WT	138	139	3.73562e-05	58	59	4.36161e-05	269	270	4.31722e-05	NA	NA	NA	NA	NA	NA	NA	NA	NA	80	81	1.72182e-05	48	49	2.26858e-05	14	15	1.87712e-05	4	5	2.69077e-06	2	3	1.49547e-06	NA	1	1.38386e-06	NA	1	2.83285e-07	NA	1	2.1609e-07	NA	NA	NA	NA	NA
IALFVSFI	ATCGCCCTTTTCGTCAGCTTCATT	WT	438	439	0.000117981	155	156	0.000115324	698	699	0.000111768	NA	NA	NA	NA	NA	NA	NA	NA	NA	274	275	5.84569e-05	137	138	6.38907e-05	61	62	7.75876e-05	705	706	0.000379937	NA	1	4.98492e-07	8	9	1.24547e-05	27	28	7.93198e-06	391	392	8.47071e-05	NA	NA	NA	NA	NA
IALLGSSL	ATCGCTCTACTCGGTTCGTCCCTC	WT	279	280	7.525e-05	123	124	9.16677e-05	482	483	7.72303e-05	NA	NA	NA	NA	NA	NA	NA	NA	NA	201	202	4.29392e-05	73	74	3.42602e-05	32	33	4.12966e-05	23	24	1.29157e-05	NA	1	4.98492e-07	NA	1	1.38386e-06	26	27	7.64869e-06	265	266	5.74798e-05	NA	NA	NA	NA	NA
IALLNFSL	ATTGCGCTTCTTAATTTTAGTTTA	WT	1275	1276	0.000342925	430	431	0.000318619	1942	1943	0.00031068	NA	NA	NA	NA	NA	NA	NA	NA	NA	736	737	0.000156664	361	362	0.000167597	152	153	0.000191466	136	137	7.37271e-05	450	451	0.00022482	89	90	0.000124547	124	125	3.54106e-05	321	322	6.95808e-05	NA	NA	NA	NA	NA
IALLTFHI	ATCGCTTTGCTGACCTTCCACATA	WT	427	428	0.000115025	165	166	0.000122716	666	667	0.000106651	NA	NA	NA	NA	NA	NA	NA	NA	NA	245	246	5.22923e-05	105	106	4.90755e-05	33	34	4.2548e-05	16	17	9.14862e-06	NA	1	4.98492e-07	1	2	2.76771e-06	605	606	0.000171671	198	199	4.30018e-05	NA	NA	NA	NA	NA
IAMKVELL	ATAGCGATGAAGGTTGAGTTGTTA	WT	530	531	0.000142706	157	158	0.000116802	713	714	0.000114167	NA	NA	NA	NA	NA	NA	NA	NA	NA	255	256	5.4418e-05	129	130	6.01869e-05	52	53	6.63249e-05	3	4	2.15262e-06	249	250	0.000124623	8	9	1.24547e-05	62	63	1.78469e-05	198	199	4.30018e-05	NA	NA	NA	NA	NA
IAMWFIRC	ATCGCTATGTGGTTCATACGCTGC	WT	92	93	2.49937e-05	25	26	1.92206e-05	215	216	3.45378e-05	NA	NA	NA	NA	NA	NA	NA	NA	NA	78	79	1.67931e-05	16	17	7.87059e-06	7	8	1.00113e-05	19	20	1.07631e-05	NA	1	4.98492e-07	48	49	6.78089e-05	NA	1	2.83285e-07	NA	1	2.1609e-07	NA	NA	NA	NA	NA
IANLYLLL	ATCGCCAATTTGTACCTTCTTTTA	WT	1373	1374	0.000369262	478	479	0.000354103	2788	2789	0.000445953	NA	NA	NA	NA	NA	NA	NA	NA	NA	953	954	0.000202792	482	483	0.000223617	155	156	0.00019522	168	169	9.09481e-05	355	356	0.000177463	1010	1011	0.00139908	155	156	4.41924e-05	1946	1947	0.000420726	NA	NA	NA	NA	NA
IARFFKGL	ATAGCGCGGTTCTTTAAAGGCCTC	WT	90	91	2.44562e-05	21	22	1.62636e-05	112	113	1.80684e-05	NA	NA	NA	NA	NA	NA	NA	NA	NA	38	39	8.29025e-06	15	16	7.40762e-06	4	5	6.25706e-06	1	2	1.07631e-06	2	3	1.49547e-06	NA	1	1.38386e-06	5	6	1.69971e-06	NA	1	2.1609e-07	NA	NA	NA	NA	NA
IARLYHSI	ATCGCACGACTGTACCATTCAATT	WT	656	657	0.000176569	221	222	0.000164115	1107	1108	0.000177166	NA	NA	NA	NA	NA	NA	NA	NA	NA	477	478	0.000101609	193	194	8.98174e-05	52	53	6.63249e-05	133	134	7.21127e-05	17	18	8.97285e-06	76	77	0.000106557	882	883	0.000250141	50	51	1.10206e-05	NA	NA	NA	NA	NA
IATLVFGL	ATCGCCACTCTCGTCTTCGGTCTT	WT	NA	1	2.6875e-07	NA	1	7.39256e-07	NA	1	1.59897e-07	NA	NA	NA	NA	NA	NA	NA	NA	NA	NA	1	2.1257e-07	NA	1	4.62976e-07	NA	1	1.25141e-06	NA	1	5.38154e-07	NA	1	4.98492e-07	NA	1	1.38386e-06	NA	1	2.83285e-07	NA	1	2.1609e-07	NA	NA	NA	NA	NA
IATRLMGL	ATCGCGACACGCTTAATGGGCTTG	WT	33	34	9.1375e-06	21	22	1.62636e-05	151	152	2.43044e-05	NA	NA	NA	NA	NA	NA	NA	NA	NA	38	39	8.29025e-06	10	11	5.09274e-06	6	7	8.75989e-06	NA	1	5.38154e-07	NA	1	4.98492e-07	NA	1	1.38386e-06	NA	1	2.83285e-07	NA	1	2.1609e-07	NA	NA	NA	NA	NA
IATYRNLL	ATAGCAACGTATCGAAATTTACTT	WT	687	688	0.0001849	279	280	0.000206992	963	964	0.000154141	NA	NA	NA	NA	NA	NA	NA	NA	NA	478	479	0.000101821	162	163	7.54651e-05	77	78	9.76102e-05	267	268	0.000144225	39	40	1.99397e-05	78	79	0.000109325	90	91	2.57789e-05	113	114	2.46342e-05	NA	NA	NA	NA	NA
IAVAYTHF	ATTGCGGTCGCATACACCCATTTT	WT	214	215	5.77812e-05	39	40	2.95702e-05	366	367	5.86822e-05	NA	NA	NA	NA	NA	NA	NA	NA	NA	131	132	2.80593e-05	53	54	2.50007e-05	27	28	3.50396e-05	4	5	2.69077e-06	3	4	1.99397e-06	NA	1	1.38386e-06	157	158	4.4759e-05	159	160	3.45743e-05	NA	NA	NA	NA	NA
IAVDFFSF	ATCGCTGTCGACTTCTTCAGCTTT	WT	868	869	0.000233544	347	348	0.000257261	1442	1443	0.000230732	NA	NA	NA	NA	NA	NA	NA	NA	NA	519	520	0.000110537	243	244	0.000112966	81	82	0.000102616	779	780	0.00041976	82	83	4.13748e-05	8	9	1.24547e-05	1952	1953	0.000553255	728	729	0.000157529	NA	NA	NA	NA	NA
IAVGIYLL	ATAGCGGTTGGCATCTACCTCCTA	WT	445	446	0.000119862	163	164	0.000121238	831	832	0.000133034	NA	NA	NA	NA	NA	NA	NA	NA	NA	272	273	5.80317e-05	131	132	6.11128e-05	62	63	7.8839e-05	14	15	8.07232e-06	66	67	3.33989e-05	7	8	1.10708e-05	6	7	1.98299e-06	155	156	3.371e-05	NA	NA	NA	NA	NA
IAVLFLAI	ATAGCAGTACTCTTTCTGGCCATC	WT	1158	1159	0.000311481	410	411	0.000303834	2023	2024	0.000323632	NA	NA	NA	NA	NA	NA	NA	NA	NA	688	689	0.000146461	326	327	0.000151393	125	126	0.000157678	252	253	0.000136153	69	70	3.48944e-05	102	103	0.000142537	1409	1410	0.000399432	414	415	8.96771e-05	NA	NA	NA	NA	NA
IAVQFVDM	ATTGCCGTGCAGTTTGTAGACATG	WT	287	288	7.74e-05	107	108	7.98396e-05	581	582	9.30601e-05	NA	NA	NA	NA	NA	NA	NA	NA	NA	184	185	3.93255e-05	84	85	3.9353e-05	33	34	4.2548e-05	12	13	6.99601e-06	214	215	0.000107176	50	51	7.05766e-05	13	14	3.96599e-06	296	297	6.41786e-05	NA	NA	NA	NA	NA
IAVRYAVI	ATAGCTGTACGCTATGCGGTCATA	WT	554	555	0.000149156	209	210	0.000155244	1084	1085	0.000173488	NA	NA	NA	NA	NA	NA	NA	NA	NA	406	407	8.65161e-05	125	126	5.8335e-05	63	64	8.00904e-05	578	579	0.000311591	13	14	6.97888e-06	292	293	0.00040547	12	13	3.6827e-06	254	255	5.51028e-05	NA	NA	NA	NA	NA
IAVSYTYI	ATTGCCGTGTCTTATACTTACATC	WT	3137	3138	0.000843337	1145	1146	0.000847187	5413	5414	0.000865683	NA	NA	NA	NA	NA	NA	NA	NA	NA	2020	2021	0.000429605	979	980	0.000453717	374	375	0.00046928	512	513	0.000276073	625	626	0.000312056	1177	1178	0.00163018	1130	1131	0.000320395	1433	1434	0.000309872	NA	NA	NA	NA	NA
IAVTILAL	ATAGCTGTAACCATACTGGCCTTA	WT	233	234	6.28875e-05	90	91	6.72723e-05	369	370	5.91619e-05	NA	NA	NA	NA	NA	NA	NA	NA	NA	117	118	2.50833e-05	60	61	2.82415e-05	17	18	2.25254e-05	5	6	3.22893e-06	3	4	1.99397e-06	44	45	6.22735e-05	1	2	5.6657e-07	18	19	4.1057e-06	NA	NA	NA	NA	NA
IAWALRDL	ATTGCATGGGCCCTGAGAGACCTT	WT	314	315	8.46562e-05	162	163	0.000120499	639	640	0.000102334	NA	NA	NA	NA	NA	NA	NA	NA	NA	181	182	3.86878e-05	94	95	4.39827e-05	37	38	4.75537e-05	30	31	1.66828e-05	11	12	5.9819e-06	NA	1	1.38386e-06	35	36	1.01983e-05	146	147	3.17652e-05	NA	NA	NA	NA	NA
IAWFLQEL	ATCGCTTGGTTCCTGCAGGAGTTG	WT	367	368	9.89e-05	131	132	9.75817e-05	603	604	9.65779e-05	NA	NA	NA	NA	NA	NA	NA	NA	NA	218	219	4.65529e-05	86	87	4.02789e-05	43	44	5.50622e-05	59	60	3.22893e-05	3827	3828	0.00190823	29	30	4.15157e-05	54	55	1.55807e-05	219	220	4.75397e-05	NA	NA	NA	NA	NA
IAYCRNNL	ATTGCGTATTGTCGTAACAATTTA	WT	481	482	0.000129537	174	175	0.00012937	933	934	0.000149344	NA	NA	NA	NA	NA	NA	NA	NA	NA	335	336	7.14237e-05	128	129	5.97239e-05	46	47	5.88164e-05	58	59	3.17511e-05	49	50	2.49246e-05	297	298	0.000412389	132	133	3.76769e-05	54	55	1.18849e-05	NA	NA	NA	NA	NA
IAYEMVCL	ATCGCCTACGAAATGGTATGTTTA	WT	1110	1111	0.000298581	398	399	0.000294963	2087	2088	0.000333865	NA	NA	NA	NA	NA	NA	NA	NA	NA	708	709	0.000150712	306	307	0.000142134	120	121	0.000151421	310	311	0.000167366	90	91	4.53627e-05	65	66	9.13344e-05	11	12	3.39942e-06	583	584	0.000126196	NA	NA	NA	NA	NA
IAYGVSAF	ATCGCGTATGGGGTTTCCGCTTTC	WT	304	305	8.19687e-05	97	98	7.24471e-05	747	748	0.000119603	NA	NA	NA	NA	NA	NA	NA	NA	NA	235	236	5.01666e-05	102	103	4.76865e-05	41	42	5.25593e-05	273	274	0.000147454	17	18	8.97285e-06	99	100	0.000138386	19	20	5.6657e-06	158	159	3.43582e-05	NA	NA	NA	NA	NA
IAYIHLVA	ATCGCCTATATTCACTTGGTAGCT	WT	2765	2766	0.000743362	956	957	0.000707468	4608	4609	0.000736966	NA	NA	NA	NA	NA	NA	NA	NA	NA	1741	1742	0.000370298	712	713	0.000330102	292	293	0.000366664	244	245	0.000131848	650	651	0.000324518	218	219	0.000303064	3513	3514	0.000995463	2881	2882	0.00062277	NA	NA	NA	NA	NA
IAYILKQM	ATTGCGTACATCTTGAAGCAGATG	WT	99	100	2.6875e-05	36	37	2.73525e-05	184	185	2.9581e-05	NA	NA	NA	NA	NA	NA	NA	NA	NA	56	57	1.21165e-05	27	28	1.29633e-05	14	15	1.87712e-05	15	16	8.61047e-06	2	3	1.49547e-06	6	7	9.68699e-06	NA	1	2.83285e-07	2	3	6.48269e-07	NA	NA	NA	NA	NA
IAYKVLEV	ATTGCCTACAAAGTCCTAGAAGTA	WT	163	164	4.4075e-05	59	60	4.43553e-05	320	321	5.1327e-05	NA	NA	NA	NA	NA	NA	NA	NA	NA	116	117	2.48707e-05	41	42	1.9445e-05	18	19	2.37768e-05	86	87	4.68194e-05	NA	1	4.98492e-07	6	7	9.68699e-06	14	15	4.24927e-06	38	39	8.42749e-06	NA	NA	NA	NA	NA
IAYPHEVV	ATAGCCTACCCGCACGAGGTCGTA	WT	51	52	1.3975e-05	28	29	2.14384e-05	70	71	1.13527e-05	NA	NA	NA	NA	NA	NA	NA	NA	NA	36	37	7.8651e-06	13	14	6.48166e-06	1	2	2.50283e-06	NA	1	5.38154e-07	NA	1	4.98492e-07	NA	1	1.38386e-06	29	30	8.49855e-06	41	42	9.07576e-06	NA	NA	NA	NA	NA
IAYRCFPG	ATAGCCTACCGGTGCTTTCCAGGT	WT	90	91	2.44562e-05	41	42	3.10487e-05	165	166	2.65429e-05	NA	NA	NA	NA	NA	NA	NA	NA	NA	55	56	1.19039e-05	41	42	1.9445e-05	8	9	1.12627e-05	NA	1	5.38154e-07	1	2	9.96983e-07	1	2	2.76771e-06	9	10	2.83285e-06	5	6	1.29654e-06	NA	NA	NA	NA	NA
IAYRQFTA	ATAGCCTACAGGCAGTTCACGGCT	WT	101	102	2.74125e-05	75	76	5.61834e-05	205	206	3.29388e-05	NA	NA	NA	NA	NA	NA	NA	NA	NA	82	83	1.76433e-05	29	30	1.38893e-05	13	14	1.75198e-05	1	2	1.07631e-06	108	109	5.43356e-05	NA	1	1.38386e-06	61	62	1.75637e-05	21	22	4.75397e-06	NA	NA	NA	NA	NA
IAYSCKLL	ATTGCTTACTCGTGCAAGCTCTTG	WT	320	321	8.62687e-05	148	149	0.000110149	598	599	9.57784e-05	NA	NA	NA	NA	NA	NA	NA	NA	NA	190	191	4.06009e-05	85	86	3.98159e-05	27	28	3.50396e-05	135	136	7.3189e-05	49	50	2.49246e-05	4	5	6.91928e-06	1333	1334	0.000377902	187	188	4.06248e-05	NA	NA	NA	NA	NA
IAYSLICV	ATAGCTTACTCGTTGATTTGTGTT	WT	2297	2298	0.000617587	775	776	0.000573662	3581	3582	0.000572751	NA	NA	NA	NA	NA	NA	NA	NA	NA	1336	1337	0.000284207	617	618	0.000286119	226	227	0.000284071	162	163	8.77192e-05	3665	3666	0.00182747	298	299	0.000413773	1400	1401	0.000396882	5077	5078	0.0010973	NA	NA	NA	NA	NA
IAYVMAAI	ATCGCGTATGTAATGGCCGCGATA	WT	NA	1	2.6875e-07	NA	1	7.39256e-07	NA	1	1.59897e-07	NA	NA	NA	NA	NA	NA	NA	NA	NA	NA	1	2.1257e-07	NA	1	4.62976e-07	NA	1	1.25141e-06	NA	1	5.38154e-07	NA	1	4.98492e-07	NA	1	1.38386e-06	NA	1	2.83285e-07	NA	1	2.1609e-07	NA	NA	NA	NA	NA
ICFFCSYI	ATCTGCTTCTTTTGCTCGTACATA	WT	2775	2776	0.00074605	972	973	0.000719296	4114	4115	0.000657977	NA	NA	NA	NA	NA	NA	NA	NA	NA	1575	1576	0.000335011	757	758	0.000350936	261	262	0.00032787	2442	2443	0.00131471	3763	3764	0.00187632	1933	1934	0.00267638	2026	2027	0.000574219	6166	6167	0.00133262	NA	NA	NA	NA	NA
ICIVWFPL	ATTTGTATTGTGTGGTTCCCGTTA	WT	516	517	0.000138944	165	166	0.000122716	884	885	0.000141509	NA	NA	NA	NA	NA	NA	NA	NA	NA	269	270	5.7394e-05	156	157	7.26872e-05	57	58	7.25819e-05	179	180	9.68678e-05	32	33	1.64502e-05	NA	1	1.38386e-06	411	412	0.000116713	25	26	5.61833e-06	NA	NA	NA	NA	NA
ICLRLALL	ATTTGCTTGAGGCTAGCACTACTA	WT	477	478	0.000128462	210	211	0.000155983	947	948	0.000151582	NA	NA	NA	NA	NA	NA	NA	NA	NA	300	301	6.39837e-05	170	171	7.91689e-05	47	48	6.00678e-05	29	30	1.61446e-05	140	141	7.02873e-05	28	29	4.01318e-05	38	39	1.10481e-05	24	25	5.40224e-06	NA	NA	NA	NA	NA
ICYIMAEI	ATCTGCTATATAATGGCCGAAATC	WT	412	413	0.000110994	175	176	0.000130109	649	650	0.000103933	NA	NA	NA	NA	NA	NA	NA	NA	NA	248	249	5.293e-05	96	97	4.49087e-05	47	48	6.00678e-05	188	189	0.000101711	9	10	4.98492e-06	3	4	5.53542e-06	246	247	6.99714e-05	126	127	2.74434e-05	NA	NA	NA	NA	NA
ICYTAALL	ATTTGTTACACGGCCGCGCTACTA	WT	251	252	6.7725e-05	120	121	8.94499e-05	494	495	7.91491e-05	NA	NA	NA	NA	NA	NA	NA	NA	NA	207	208	4.42146e-05	85	86	3.98159e-05	31	32	4.00452e-05	320	321	0.000172748	3591	3592	0.00179058	20	21	2.9061e-05	35	36	1.01983e-05	18	19	4.1057e-06	NA	NA	NA	NA	NA
IDIVFAPL	ATTGACATCGTATTTGCCCCGCTC	WT	437	438	0.000117712	118	119	8.79714e-05	644	645	0.000103134	NA	NA	NA	NA	NA	NA	NA	NA	NA	244	245	5.20797e-05	117	118	5.46312e-05	40	41	5.13079e-05	398	399	0.000214724	27	28	1.39578e-05	105	106	0.000146689	80	81	2.29461e-05	74	75	1.62067e-05	NA	NA	NA	NA	NA
IDPIFMHL	ATCGACCCGATATTCATGCATCTA	WT	444	445	0.000119594	168	169	0.000124934	804	805	0.000128717	NA	NA	NA	NA	NA	NA	NA	NA	NA	274	275	5.84569e-05	139	140	6.48166e-05	44	45	5.63136e-05	16	17	9.14862e-06	7	8	3.98793e-06	17	18	2.49094e-05	6	7	1.98299e-06	262	263	5.68315e-05	NA	NA	NA	NA	NA
IEWIFLTL	ATAGAGTGGATCTTTCTAACCCTA	WT	374	375	0.000100781	153	154	0.000113845	704	705	0.000112727	NA	NA	NA	NA	NA	NA	NA	NA	NA	233	234	4.97415e-05	122	123	5.69461e-05	44	45	5.63136e-05	563	564	0.000303519	23	24	1.19638e-05	4	5	6.91928e-06	332	333	9.43339e-05	4320	4321	0.000933723	NA	NA	NA	NA	NA
IFAGFGLL	ATCTTCGCAGGTTTTGGACTGCTA	WT	817	818	0.000219837	285	286	0.000211427	1448	1449	0.000231691	NA	NA	NA	NA	NA	NA	NA	NA	NA	504	505	0.000107348	226	227	0.000105096	76	77	9.63588e-05	1231	1232	0.000663006	121	122	6.0816e-05	21	22	3.04448e-05	2229	2230	0.000631725	2421	2422	0.000523369	NA	NA	NA	NA	NA
IFCDFPPL	ATCTTCTGCGATTTCCCACCGCTG	WT	99	100	2.6875e-05	42	43	3.1788e-05	218	219	3.50175e-05	NA	NA	NA	NA	NA	NA	NA	NA	NA	68	69	1.46674e-05	36	37	1.71301e-05	6	7	8.75989e-06	NA	1	5.38154e-07	5	6	2.99095e-06	209	210	0.00029061	337	338	9.57503e-05	177	178	3.84639e-05	NA	NA	NA	NA	NA
IFDFMDTL	ATCTTTGATTTTATGGACACGTTG	WT	392	393	0.000105619	173	174	0.00012863	723	724	0.000115766	NA	NA	NA	NA	NA	NA	NA	NA	NA	265	266	5.65437e-05	127	128	5.92609e-05	42	43	5.38107e-05	46	47	2.52933e-05	6	7	3.48944e-06	61	62	8.5799e-05	744	745	0.000211047	166	167	3.60869e-05	NA	NA	NA	NA	NA
IFFASIGL	ATCTTCTTCGCCAGTATTGGCCTG	WT	31	32	8.6e-06	23	24	1.77421e-05	87	88	1.40709e-05	NA	NA	NA	NA	NA	NA	NA	NA	NA	28	29	6.16454e-06	18	19	8.79654e-06	9	10	1.25141e-05	20	21	1.13012e-05	NA	1	4.98492e-07	186	187	0.000258781	NA	1	2.83285e-07	NA	1	2.1609e-07	NA	NA	NA	NA	NA
IFFCFSSF	ATTTTCTTTTGTTTCTCAAGCTTT	WT	1382	1383	0.000371681	472	473	0.000349668	1917	1918	0.000306683	NA	NA	NA	NA	NA	NA	NA	NA	NA	800	801	0.000170269	418	419	0.000193987	117	118	0.000147667	490	491	0.000264234	1876	1877	0.000935669	305	306	0.00042346	181	182	5.15579e-05	1467	1468	0.000317219	NA	NA	NA	NA	NA
IFFCIGLL	ATTTTCTTCTGTATAGGTTTACTA	WT	776	777	0.000208819	274	275	0.000203295	1205	1206	0.000192836	NA	NA	NA	NA	NA	NA	NA	NA	NA	534	535	0.000113725	261	262	0.0001213	79	80	0.000100113	99	100	5.38154e-05	23	24	1.19638e-05	2	3	4.15157e-06	256	257	7.28042e-05	859	860	0.000185837	NA	NA	NA	NA	NA
IFFFFYSV	ATTTTCTTCTTCTTCTACTCGGTC	WT	2291	2292	0.000615975	703	704	0.000520436	2964	2965	0.000474095	NA	NA	NA	NA	NA	NA	NA	NA	NA	1266	1267	0.000269327	641	642	0.000297231	217	218	0.000272808	438	439	0.00023625	3914	3915	0.00195159	329	330	0.000456672	1790	1791	0.000507363	666	667	0.000144132	NA	NA	NA	NA	NA
IFFHMAVM	ATTTTCTTCCACATGGCTGTAATG	WT	511	512	0.0001376	222	223	0.000164854	915	916	0.000146466	NA	NA	NA	NA	NA	NA	NA	NA	NA	311	312	6.6322e-05	172	173	8.00949e-05	59	60	7.50848e-05	22	23	1.23775e-05	1546	1547	0.000771166	36	37	5.12026e-05	35	36	1.01983e-05	105	106	2.29055e-05	NA	NA	NA	NA	NA
IFFLLAQV	ATTTTCTTCCTCTTGGCACAAGTA	WT	888	889	0.000238919	306	307	0.000226951	1424	1425	0.000227853	NA	NA	NA	NA	NA	NA	NA	NA	NA	511	512	0.000108836	236	237	0.000109725	92	93	0.000116381	4	5	2.69077e-06	380	381	0.000189925	26	27	3.73641e-05	661	662	0.000187535	176	177	3.82478e-05	NA	NA	NA	NA	NA
IFFLVPQV	ATCTTCTTCTTAGTTCCACAGGTC	WT	868	869	0.000233544	314	315	0.000232866	1525	1526	0.000244003	NA	NA	NA	NA	NA	NA	NA	NA	NA	607	608	0.000129243	282	283	0.000131022	118	119	0.000148918	1601	1602	0.000862123	1041	1042	0.000519428	37	38	5.25865e-05	481	482	0.000136543	434	435	9.39989e-05	NA	NA	NA	NA	NA
IFFMFIQI	ATCTTCTTTATGTTTATACAGATA	WT	1477	1478	0.000397212	475	476	0.000351886	2251	2252	0.000360088	NA	NA	NA	NA	NA	NA	NA	NA	NA	872	873	0.000185574	430	431	0.000199543	121	122	0.000152672	247	248	0.000133462	395	396	0.000197403	509	510	0.000705766	310	311	8.81016e-05	1007	1008	0.000217818	NA	NA	NA	NA	NA
IFFSLSLL	ATTTTCTTTTCCTTGTCTCTACTT	WT	1546	1547	0.000415756	503	504	0.000372585	2065	2066	0.000330347	NA	NA	NA	NA	NA	NA	NA	NA	NA	973	974	0.000207044	538	539	0.000249544	173	174	0.000217746	1829	1830	0.000984822	107	108	5.38371e-05	62	63	8.71829e-05	468	469	0.000132861	2784	2785	0.000601809	NA	NA	NA	NA	NA
IFFSYVLI	ATATTCTTCTCTTACGTGTTGATA	WT	2941	2942	0.000790662	972	973	0.000719296	4180	4181	0.00066853	NA	NA	NA	NA	NA	NA	NA	NA	NA	1683	1684	0.000357969	790	791	0.000366214	318	319	0.000399201	650	651	0.000350338	1062	1063	0.000529897	1181	1182	0.00163572	2785	2786	0.000789232	3722	3723	0.000804501	NA	NA	NA	NA	NA
IFFVEAFL	ATCTTCTTCGTTGAAGCGTTTCTT	WT	579	580	0.000155875	209	210	0.000155244	929	930	0.000148704	NA	NA	NA	NA	NA	NA	NA	NA	NA	348	349	7.41871e-05	181	182	8.42616e-05	72	73	9.13531e-05	47	48	2.58314e-05	NA	1	4.98492e-07	196	197	0.000272619	53	54	1.52974e-05	829	830	0.000179354	NA	NA	NA	NA	NA
IFFVSAGL	ATATTCTTCGTGAGCGCAGGCTTG	WT	217	218	5.85875e-05	78	79	5.84012e-05	474	475	7.59511e-05	NA	NA	NA	NA	NA	NA	NA	NA	NA	176	177	3.7625e-05	64	65	3.00934e-05	33	34	4.2548e-05	93	94	5.05865e-05	127	128	6.38069e-05	NA	1	1.38386e-06	75	76	2.15297e-05	184	185	3.99766e-05	NA	NA	NA	NA	NA
IFIQHNGL	ATATTTATACAGCATAACGGACTG	WT	116	117	3.14437e-05	45	46	3.40058e-05	176	177	2.83018e-05	NA	NA	NA	NA	NA	NA	NA	NA	NA	64	65	1.38171e-05	25	26	1.20374e-05	8	9	1.12627e-05	19	20	1.07631e-05	NA	1	4.98492e-07	NA	1	1.38386e-06	34	35	9.91497e-06	17	18	3.88961e-06	NA	NA	NA	NA	NA
IFIRWLSV	ATCTTCATCCGCTGGCTATCGGTC	WT	705	706	0.000189737	235	236	0.000174464	1226	1227	0.000196194	NA	NA	NA	NA	NA	NA	NA	NA	NA	434	435	9.24681e-05	192	193	8.93544e-05	77	78	9.76102e-05	222	223	0.000120008	34	35	1.74472e-05	269	270	0.000373641	9753	9754	0.00276316	84	85	1.83676e-05	NA	NA	NA	NA	NA
IFIYVWPL	ATCTTCATCTATGTTTGGCCCCTA	WT	85	86	2.31125e-05	40	41	3.03095e-05	206	207	3.30987e-05	NA	NA	NA	NA	NA	NA	NA	NA	NA	66	67	1.42422e-05	29	30	1.38893e-05	10	11	1.37655e-05	4	5	2.69077e-06	NA	1	4.98492e-07	NA	1	1.38386e-06	2	3	8.49855e-07	5	6	1.29654e-06	NA	NA	NA	NA	NA
IFKFSQTI	ATCTTTAAATTTTCCCAAACGATA	WT	324	325	8.73437e-05	102	103	7.61433e-05	430	431	6.89157e-05	NA	NA	NA	NA	NA	NA	NA	NA	NA	213	214	4.54901e-05	107	108	5.00014e-05	43	44	5.50622e-05	132	133	7.15745e-05	31	32	1.59517e-05	4	5	6.91928e-06	241	242	6.85549e-05	1393	1394	0.000301229	NA	NA	NA	NA	NA
IFKKLPNL	ATCTTCAAGAAGCTGCCAAACTTA	WT	561	562	0.000151037	248	249	0.000184075	1081	1082	0.000173009	NA	NA	NA	NA	NA	NA	NA	NA	NA	406	407	8.65161e-05	182	183	8.47246e-05	62	63	7.8839e-05	641	642	0.000345495	1109	1110	0.000553326	191	192	0.0002657	327	328	9.29175e-05	88	89	1.9232e-05	NA	NA	NA	NA	NA
IFLAYAQL	ATATTCCTGGCATACGCCCAACTT	WT	638	639	0.000171731	184	185	0.000136762	981	982	0.000157019	NA	NA	NA	NA	NA	NA	NA	NA	NA	348	349	7.41871e-05	163	164	7.59281e-05	53	54	6.75763e-05	13	14	7.53416e-06	246	247	0.000123127	15	16	2.21417e-05	62	63	1.78469e-05	864	865	0.000186917	NA	NA	NA	NA	NA
IFLFITYL	ATCTTTCTTTTCATTACGTATCTT	WT	4075	4076	0.00109542	1336	1337	0.000988385	5383	5384	0.000860886	NA	NA	NA	NA	NA	NA	NA	NA	NA	2475	2476	0.000526324	1240	1241	0.000574553	428	429	0.000536856	7403	7404	0.00398449	1640	1641	0.000818025	209	210	0.00029061	7255	7256	0.00205552	11121	11122	0.00240335	NA	NA	NA	NA	NA
IFLFLTAI	ATCTTTCTATTTCTTACCGCGATC	WT	1096	1097	0.000294819	370	371	0.000274264	1760	1761	0.000281579	NA	NA	NA	NA	NA	NA	NA	NA	NA	714	715	0.000151988	302	303	0.000140282	101	102	0.000127644	369	370	0.000199117	504	505	0.000251738	209	210	0.00029061	259	260	7.36541e-05	102	103	2.22572e-05	NA	NA	NA	NA	NA
IFLFLTFL	ATATTCTTGTTCCTGACATTTCTC	WT	890	891	0.000239456	318	319	0.000235823	1240	1241	0.000198432	NA	NA	NA	NA	NA	NA	NA	NA	NA	503	504	0.000107135	209	210	9.7225e-05	87	88	0.000110124	183	184	9.90204e-05	196	197	9.82028e-05	411	412	0.000570148	99	100	2.83285e-05	698	699	0.000151047	NA	NA	NA	NA	NA
IFLGMGTL	ATTTTCTTGGGGATGGGTACCTTG	WT	401	402	0.000108037	159	160	0.000118281	883	884	0.000141349	NA	NA	NA	NA	NA	NA	NA	NA	NA	306	307	6.52591e-05	120	121	5.60201e-05	40	41	5.13079e-05	58	59	3.17511e-05	62	63	3.1405e-05	47	48	6.6425e-05	2151	2152	0.000609629	1248	1249	0.000269896	NA	NA	NA	NA	NA
IFLKLGGL	ATCTTCTTAAAATTGGGTGGACTC	WT	697	698	0.000187587	237	238	0.000175943	966	967	0.00015462	NA	NA	NA	NA	NA	NA	NA	NA	NA	413	414	8.80041e-05	177	178	8.24097e-05	67	68	8.50961e-05	40	41	2.20643e-05	105	106	5.28401e-05	22	23	3.18287e-05	345	346	9.80166e-05	197	198	4.27857e-05	NA	NA	NA	NA	NA
IFLRLGHI	ATATTTCTCCGGTTAGGACATATA	WT	1792	1793	0.000481869	729	730	0.000539657	2896	2897	0.000463222	NA	NA	NA	NA	NA	NA	NA	NA	NA	1086	1087	0.000231064	434	435	0.000201395	187	188	0.000235266	740	741	0.000398772	666	667	0.000332494	149	150	0.000207578	751	752	0.00021303	202	203	4.38662e-05	NA	NA	NA	NA	NA
IFLSALLL	ATCTTCTTATCGGCATTACTTTTG	WT	736	737	0.000198069	321	322	0.00023804	1312	1313	0.000209945	NA	NA	NA	NA	NA	NA	NA	NA	NA	459	460	9.77824e-05	269	270	0.000125004	79	80	0.000100113	137	138	7.42653e-05	536	537	0.00026769	219	220	0.000304448	53	54	1.52974e-05	486	487	0.000105236	NA	NA	NA	NA	NA
IFLTTFPL	ATTTTCCTTACAACGTTTCCATTG	WT	1271	1272	0.00034185	411	412	0.000304573	1813	1814	0.000290053	NA	NA	NA	NA	NA	NA	NA	NA	NA	699	700	0.000148799	344	345	0.000159727	121	122	0.000152672	1429	1430	0.000769561	1260	1261	0.000628598	91	92	0.000127315	255	256	7.25209e-05	365	366	7.90888e-05	NA	NA	NA	NA	NA
IFMQHQRI	ATCTTCATGCAGCACCAGCGAATA	WT	231	232	6.235e-05	143	144	0.000106453	649	650	0.000103933	NA	NA	NA	NA	NA	NA	NA	NA	NA	193	194	4.12387e-05	77	78	3.61121e-05	36	37	4.63023e-05	190	191	0.000102787	1685	1686	0.000840457	35	36	4.98188e-05	15	16	4.53256e-06	3735	3736	0.00080731	NA	NA	NA	NA	NA
IFMYEEGL	ATCTTCATGTACGAAGAGGGCTTA	WT	188	189	5.07937e-05	62	63	4.65731e-05	347	348	5.56442e-05	NA	NA	NA	NA	NA	NA	NA	NA	NA	99	100	2.1257e-05	36	37	1.71301e-05	22	23	2.87825e-05	45	46	2.47551e-05	NA	1	4.98492e-07	NA	1	1.38386e-06	10	11	3.11613e-06	5	6	1.29654e-06	NA	NA	NA	NA	NA
IFNFLLTV	ATATTTAATTTCCTTTTGACAGTA	WT	627	628	0.000168775	220	221	0.000163376	1085	1086	0.000173648	NA	NA	NA	NA	NA	NA	NA	NA	NA	464	465	9.88452e-05	215	216	0.000100003	80	81	0.000101364	50	51	2.74459e-05	14	15	7.47737e-06	1586	1587	0.00219618	111	112	3.17279e-05	582	583	0.00012598	NA	NA	NA	NA	NA
IFPRFYFL	ATTTTCCCCAGGTTCTATTTTCTA	WT	1474	1475	0.000396406	443	444	0.00032823	2131	2132	0.000340901	NA	NA	NA	NA	NA	NA	NA	NA	NA	978	979	0.000208106	441	442	0.000204635	156	157	0.000196472	196	197	0.000106016	327	328	0.000163505	24	25	3.45964e-05	1288	1289	0.000365154	4542	4543	0.000981695	NA	NA	NA	NA	NA
IFPYEMLM	ATCTTTCCTTACGAAATGTTAATG	WT	1153	1154	0.000310137	399	400	0.000295702	1665	1666	0.000266389	NA	NA	NA	NA	NA	NA	NA	NA	NA	666	667	0.000141784	333	334	0.000154634	126	127	0.000158929	133	134	7.21127e-05	169	170	8.47436e-05	232	233	0.000322438	1258	1259	0.000356656	1677	1678	0.000362598	NA	NA	NA	NA	NA
IFQHYFGI	ATCTTCCAACATTATTTCGGTATT	WT	1062	1063	0.000285681	375	376	0.00027796	1528	1529	0.000244483	NA	NA	NA	NA	NA	NA	NA	NA	NA	615	616	0.000130943	329	330	0.000152782	113	114	0.000142661	294	295	0.000158756	311	312	0.000155529	529	530	0.000733443	1473	1474	0.000417562	365	366	7.90888e-05	NA	NA	NA	NA	NA
IFQKSSSL	ATATTCCAAAAGTCATCCTCGCTG	WT	163	164	4.4075e-05	70	71	5.24872e-05	410	411	6.57177e-05	NA	NA	NA	NA	NA	NA	NA	NA	NA	105	106	2.25325e-05	55	56	2.59267e-05	29	30	3.75424e-05	50	51	2.74459e-05	2	3	1.49547e-06	82	83	0.00011486	553	554	0.00015694	27	28	6.05051e-06	NA	NA	NA	NA	NA
IFQMMNTL	ATATTCCAAATGATGAATACTCTA	WT	195	196	5.2675e-05	67	68	5.02694e-05	339	340	5.4365e-05	NA	NA	NA	NA	NA	NA	NA	NA	NA	108	109	2.31702e-05	32	33	1.52782e-05	14	15	1.87712e-05	8	9	4.84339e-06	14	15	7.47737e-06	1	2	2.76771e-06	NA	1	2.83285e-07	1	2	4.32179e-07	NA	NA	NA	NA	NA
IFQNIANL	ATCTTCCAAAACATAGCAAATTTA	WT	118	119	3.19812e-05	83	84	6.20975e-05	300	301	4.8129e-05	NA	NA	NA	NA	NA	NA	NA	NA	NA	83	84	1.78559e-05	39	40	1.8519e-05	17	18	2.25254e-05	8	9	4.84339e-06	21	22	1.09668e-05	NA	1	1.38386e-06	18	19	5.38241e-06	4	5	1.08045e-06	NA	NA	NA	NA	NA
IFQRLTEL	ATATTCCAGAGGTTGACTGAATTA	WT	354	355	9.54062e-05	121	122	9.01892e-05	570	571	9.13012e-05	NA	NA	NA	NA	NA	NA	NA	NA	NA	262	263	5.5906e-05	121	122	5.64831e-05	44	45	5.63136e-05	1048	1049	0.000564524	376	377	0.000187931	10	11	1.52224e-05	730	731	0.000207081	543	544	0.000117553	NA	NA	NA	NA	NA
IFRLAFRM	ATATTTCGACTCGCTTTTCGTATG	WT	619	620	0.000166625	197	198	0.000146373	951	952	0.000152222	NA	NA	NA	NA	NA	NA	NA	NA	NA	366	367	7.80133e-05	185	186	8.61135e-05	68	69	8.63475e-05	151	152	8.17995e-05	627	628	0.000313053	9	10	1.38386e-05	49	50	1.41642e-05	369	370	7.99531e-05	NA	NA	NA	NA	NA
IFSAHPTL	ATATTTTCAGCACACCCGACGTTG	WT	228	229	6.15437e-05	61	62	4.58339e-05	310	311	4.9728e-05	NA	NA	NA	NA	NA	NA	NA	NA	NA	123	124	2.63587e-05	67	68	3.14824e-05	16	17	2.1274e-05	204	205	0.000110322	126	127	6.33084e-05	1	2	2.76771e-06	NA	1	2.83285e-07	14	15	3.24134e-06	NA	NA	NA	NA	NA
IFSFEVNV	ATCTTTTCGTTCGAGGTGAACGTG	WT	195	196	5.2675e-05	80	81	5.98797e-05	324	325	5.19666e-05	NA	NA	NA	NA	NA	NA	NA	NA	NA	86	87	1.84936e-05	68	69	3.19453e-05	21	22	2.75311e-05	51	52	2.7984e-05	NA	1	4.98492e-07	NA	1	1.38386e-06	1135	1136	0.000321812	1300	1301	0.000281132	NA	NA	NA	NA	NA
IFSFSAAV	ATATTTTCATTTTCCGCCGCCGTT	WT	339	340	9.1375e-05	123	124	9.16677e-05	643	644	0.000102974	NA	NA	NA	NA	NA	NA	NA	NA	NA	196	197	4.18764e-05	105	106	4.90755e-05	36	37	4.63023e-05	24	25	1.34539e-05	103	104	5.18431e-05	191	192	0.0002657	10	11	3.11613e-06	14	15	3.24134e-06	NA	NA	NA	NA	NA
IFSFVMNF	ATCTTCTCCTTTGTTATGAACTTC	WT	1620	1621	0.000435644	566	567	0.000419158	2398	2399	0.000383593	NA	NA	NA	NA	NA	NA	NA	NA	NA	918	919	0.000195352	486	487	0.000225469	154	155	0.000193969	826	827	0.000445054	734	735	0.000366391	356	357	0.000494036	1385	1386	0.000392633	4840	4841	0.00104609	NA	NA	NA	NA	NA
IFSKYGKI	ATATTTTCGAAATACGGCAAAATA	WT	192	193	5.18687e-05	97	98	7.24471e-05	325	326	5.21265e-05	NA	NA	NA	NA	NA	NA	NA	NA	NA	123	124	2.63587e-05	54	55	2.54637e-05	20	21	2.62797e-05	1	2	1.07631e-06	96	97	4.83537e-05	2	3	4.15157e-06	19	20	5.6657e-06	20	21	4.53788e-06	NA	NA	NA	NA	NA
IFSLFAPF	ATATTCTCTTTATTTGCTCCTTTC	WT	3648	3649	0.000980669	1189	1190	0.000879714	4632	4633	0.000740803	NA	NA	NA	NA	NA	NA	NA	NA	NA	2093	2094	0.000445122	961	962	0.000445383	361	362	0.000453011	2475	2476	0.00133247	2851	2852	0.0014217	362	363	0.000502339	2916	2917	0.000826342	4366	4367	0.000943663	NA	NA	NA	NA	NA
IFSYVLIL	ATATTCAGTTATGTTCTCATTTTG	WT	2191	2192	0.0005891	658	659	0.000487169	3088	3089	0.000493922	NA	NA	NA	NA	NA	NA	NA	NA	NA	1299	1300	0.000276342	525	526	0.000243525	185	186	0.000232763	408	409	0.000220105	2426	2427	0.00120984	28	29	4.01318e-05	549	550	0.000155807	5046	5047	0.0010906	NA	NA	NA	NA	NA
IFTFFLSL	ATATTTACTTTCTTCTTAAGTCTG	WT	2317	2318	0.000622962	744	745	0.000550745	3056	3057	0.000488805	NA	NA	NA	NA	NA	NA	NA	NA	NA	1314	1315	0.00027953	598	599	0.000277323	208	209	0.000261545	1003	1004	0.000540307	284	285	0.00014207	240	241	0.000333509	1409	1410	0.000399432	3155	3156	0.000681978	NA	NA	NA	NA	NA
IFTFNFTI	ATATTTACATTCAACTTCACCATC	WT	613	614	0.000165012	256	257	0.000189989	1193	1194	0.000190917	NA	NA	NA	NA	NA	NA	NA	NA	NA	460	461	9.7995e-05	209	210	9.7225e-05	62	63	7.8839e-05	130	131	7.04982e-05	34	35	1.74472e-05	22	23	3.18287e-05	1868	1869	0.00052946	424	425	9.1838e-05	NA	NA	NA	NA	NA
IFTSFLLL	ATATTTACTTCCTTCTTACTATTA	WT	3192	3193	0.000858119	1081	1082	0.000799875	4304	4305	0.000688357	NA	NA	NA	NA	NA	NA	NA	NA	NA	1794	1795	0.000381564	887	888	0.000411123	308	309	0.000386686	3285	3286	0.00176838	1548	1549	0.000772163	91	92	0.000127315	3212	3213	0.000910194	2348	2349	0.000507594	NA	NA	NA	NA	NA
IFVFNHCL	ATCTTCGTCTTCAACCATTGTCTC	WT	1603	1604	0.000431075	564	565	0.000417679	2689	2690	0.000430123	NA	NA	NA	NA	NA	NA	NA	NA	NA	1025	1026	0.000218097	482	483	0.000223617	147	148	0.000185209	538	539	0.000290065	1281	1282	0.000639066	489	490	0.000678089	1809	1810	0.000512746	327	328	7.08774e-05	NA	NA	NA	NA	NA
IFVFYCVM	ATATTTGTATTCTACTGCGTTATG	WT	368	369	9.91687e-05	157	158	0.000116802	485	486	7.771e-05	NA	NA	NA	NA	NA	NA	NA	NA	NA	226	227	4.82535e-05	105	106	4.90755e-05	41	42	5.25593e-05	1	2	1.07631e-06	28	29	1.44563e-05	16	17	2.35255e-05	2776	2777	0.000786682	228	229	4.94845e-05	NA	NA	NA	NA	NA
IFVMFLTI	ATATTTGTGATGTTCCTCACGATT	WT	631	632	0.00016985	254	255	0.00018851	930	931	0.000148864	NA	NA	NA	NA	NA	NA	NA	NA	NA	408	409	8.69413e-05	184	185	8.56506e-05	75	76	9.51074e-05	47	48	2.58314e-05	5	6	2.99095e-06	468	469	0.000649028	137	138	3.90933e-05	3385	3386	0.000731679	NA	NA	NA	NA	NA
IFWYKGAI	ATATTCTGGTACAAAGGTGCGATT	WT	NA	1	2.6875e-07	NA	1	7.39256e-07	NA	1	1.59897e-07	NA	NA	NA	NA	NA	NA	NA	NA	NA	NA	1	2.1257e-07	NA	1	4.62976e-07	NA	1	1.25141e-06	NA	1	5.38154e-07	NA	1	4.98492e-07	NA	1	1.38386e-06	NA	1	2.83285e-07	NA	1	2.1609e-07	NA	NA	NA	NA	NA
IFYFIQKI	ATTTTCTACTTCATACAGAAGATT	WT	631	632	0.00016985	206	207	0.000153026	1066	1067	0.00017061	NA	NA	NA	NA	NA	NA	NA	NA	NA	408	409	8.69413e-05	183	184	8.51876e-05	65	66	8.25932e-05	763	764	0.00041115	46	47	2.34291e-05	61	62	8.5799e-05	345	346	9.80166e-05	734	735	0.000158826	NA	NA	NA	NA	NA
IFYFVSYI	ATCTTTTACTTCGTGTCGTACATA	WT	575	576	0.0001548	203	204	0.000150808	833	834	0.000133354	NA	NA	NA	NA	NA	NA	NA	NA	NA	307	308	6.54717e-05	170	171	7.91689e-05	56	57	7.13305e-05	127	128	6.88838e-05	36	37	1.84442e-05	383	384	0.0005314	37	38	1.07648e-05	318	319	6.89326e-05	NA	NA	NA	NA	NA
IGDLFPAL	ATCGGGGACCTATTCCCCGCCTTG	WT	279	280	7.525e-05	122	123	9.09284e-05	430	431	6.89157e-05	NA	NA	NA	NA	NA	NA	NA	NA	NA	172	173	3.67747e-05	57	58	2.68526e-05	41	42	5.25593e-05	46	47	2.52933e-05	133	134	6.67979e-05	NA	1	1.38386e-06	232	233	6.60054e-05	98	99	2.13929e-05	NA	NA	NA	NA	NA
IGFFKQKL	ATAGGTTTCTTCAAGCAAAAGTTG	WT	361	362	9.72875e-05	142	143	0.000105714	658	659	0.000105372	NA	NA	NA	NA	NA	NA	NA	NA	NA	241	242	5.1442e-05	118	119	5.50941e-05	53	54	6.75763e-05	45	46	2.47551e-05	17	18	8.97285e-06	1	2	2.76771e-06	363	364	0.000103116	831	832	0.000179786	NA	NA	NA	NA	NA
IGFGAMFL	ATCGGTTTCGGTGCCATGTTCCTC	WT	269	270	7.25625e-05	92	93	6.87508e-05	502	503	8.04282e-05	NA	NA	NA	NA	NA	NA	NA	NA	NA	121	122	2.59336e-05	70	71	3.28713e-05	28	29	3.6291e-05	67	68	3.65945e-05	79	80	3.98793e-05	1	2	2.76771e-06	272	273	7.73368e-05	79	80	1.72872e-05	NA	NA	NA	NA	NA
IGFIPPKL	ATAGGATTTATCCCTCCTAAGCTG	WT	1570	1571	0.000422206	623	624	0.000461296	2929	2930	0.000468499	NA	NA	NA	NA	NA	NA	NA	NA	NA	949	950	0.000201942	440	441	0.000204172	152	153	0.000191466	1379	1380	0.000742653	295	296	0.000147554	14	15	2.07578e-05	28	29	8.21526e-06	547	548	0.000118417	NA	NA	NA	NA	NA
IGFLTLIL	ATTGGCTTCCTGACACTTATCCTC	WT	1115	1116	0.000299925	390	391	0.000289049	1829	1830	0.000292612	NA	NA	NA	NA	NA	NA	NA	NA	NA	708	709	0.000150712	297	298	0.000137967	115	116	0.000145164	83	84	4.5205e-05	181	182	9.07255e-05	332	333	0.000460824	134	135	3.82435e-05	432	433	9.35668e-05	NA	NA	NA	NA	NA
IGFLYIQA	ATAGGATTCCTGTACATCCAGGCC	WT	507	508	0.000136525	189	190	0.000140459	925	926	0.000148065	NA	NA	NA	NA	NA	NA	NA	NA	NA	364	365	7.75882e-05	126	127	5.8798e-05	51	52	6.50735e-05	4	5	2.69077e-06	201	202	0.000100695	4	5	6.91928e-06	47	48	1.35977e-05	504	505	0.000109125	NA	NA	NA	NA	NA
IGFNPGHV	ATCGGGTTTAACCCAGGACACGTT	WT	40	41	1.10187e-05	33	34	2.51347e-05	102	103	1.64694e-05	NA	NA	NA	NA	NA	NA	NA	NA	NA	25	26	5.52683e-06	10	11	5.09274e-06	5	6	7.50848e-06	NA	1	5.38154e-07	NA	1	4.98492e-07	1	2	2.76771e-06	NA	1	2.83285e-07	NA	1	2.1609e-07	NA	NA	NA	NA	NA
IGFPAPPV	ATAGGATTCCCCGCTCCGCCGGTC	WT	97	98	2.63375e-05	43	44	3.25272e-05	154	155	2.47841e-05	NA	NA	NA	NA	NA	NA	NA	NA	NA	76	77	1.63679e-05	24	25	1.15744e-05	10	11	1.37655e-05	3	4	2.15262e-06	3	4	1.99397e-06	1	2	2.76771e-06	NA	1	2.83285e-07	8	9	1.94481e-06	NA	NA	NA	NA	NA
IGFSYSLG	ATCGGATTCTCGTATTCGCTAGGA	WT	59	60	1.6125e-05	40	41	3.03095e-05	92	93	1.48704e-05	NA	NA	NA	NA	NA	NA	NA	NA	NA	58	59	1.25417e-05	31	32	1.48152e-05	9	10	1.25141e-05	37	38	2.04499e-05	NA	1	4.98492e-07	1	2	2.76771e-06	1	2	5.6657e-07	1	2	4.32179e-07	NA	NA	NA	NA	NA
IGFTSTTI	ATAGGGTTCACCTCCACAACCATA	WT	867	868	0.000233275	333	334	0.000246911	1501	1502	0.000240165	NA	NA	NA	NA	NA	NA	NA	NA	NA	561	562	0.000119465	243	244	0.000112966	91	92	0.00011513	113	114	6.13496e-05	72	73	3.63899e-05	33	34	4.70511e-05	176	177	5.01414e-05	285	286	6.18016e-05	NA	NA	NA	NA	NA
IGFYINEV	ATCGGATTTTACATAAATGAAGTC	WT	1894	1895	0.000509281	666	667	0.000493084	3326	3327	0.000531978	NA	NA	NA	NA	NA	NA	NA	NA	NA	1216	1217	0.000258698	525	526	0.000243525	201	202	0.000252785	1926	1927	0.00103702	693	694	0.000345953	143	144	0.000199275	797	798	0.000226061	2397	2398	0.000518183	NA	NA	NA	NA	NA
IGGVLFSL	ATCGGTGGGGTTCTCTTCTCCTTG	WT	608	609	0.000163669	188	189	0.000139719	999	1000	0.000159897	NA	NA	NA	NA	NA	NA	NA	NA	NA	389	390	8.29025e-05	177	178	8.24097e-05	53	54	6.75763e-05	171	172	9.25625e-05	19	20	9.96983e-06	257	258	0.000357035	359	360	0.000101983	1125	1126	0.000243317	NA	NA	NA	NA	NA
IGIAMAVL	ATAGGAATCGCTATGGCGGTTCTC	WT	303	304	8.17e-05	80	81	5.98797e-05	439	440	7.03547e-05	NA	NA	NA	NA	NA	NA	NA	NA	NA	165	166	3.52867e-05	77	78	3.61121e-05	27	28	3.50396e-05	1	2	1.07631e-06	5	6	2.99095e-06	NA	1	1.38386e-06	173	174	4.92916e-05	116	117	2.52825e-05	NA	NA	NA	NA	NA
IGILIASL	ATTGGGATTCTTATCGCAAGTCTA	WT	1321	1322	0.000355287	481	482	0.000356321	2254	2255	0.000360568	NA	NA	NA	NA	NA	NA	NA	NA	NA	873	874	0.000185787	370	371	0.000171764	163	164	0.000205232	86	87	4.68194e-05	455	456	0.000227312	2203	2204	0.00305002	849	850	0.000240792	492	493	0.000106532	NA	NA	NA	NA	NA
IGILLGFI	ATAGGGATCCTTTTAGGATTCATC	WT	905	906	0.000243487	307	308	0.000227691	1445	1446	0.000231211	NA	NA	NA	NA	NA	NA	NA	NA	NA	543	544	0.000115638	265	266	0.000123152	88	89	0.000111376	381	382	0.000205575	38	39	1.94412e-05	44	45	6.22735e-05	520	521	0.000147591	685	686	0.000148237	NA	NA	NA	NA	NA
IGILLGLI	ATCGGTATTCTCCTTGGGCTGATA	WT	733	734	0.000197262	252	253	0.000187032	1457	1458	0.00023313	NA	NA	NA	NA	NA	NA	NA	NA	NA	401	402	8.54533e-05	178	179	8.28727e-05	68	69	8.63475e-05	39	40	2.15262e-05	70	71	3.53929e-05	2709	2710	0.00375025	472	473	0.000133994	100	101	2.1825e-05	NA	NA	NA	NA	NA
IGILYMVL	ATCGGCATACTTTACATGGTGTTG	WT	134	135	3.62812e-05	65	66	4.87909e-05	313	314	5.02077e-05	NA	NA	NA	NA	NA	NA	NA	NA	NA	98	99	2.10445e-05	30	31	1.43523e-05	20	21	2.62797e-05	6	7	3.76708e-06	926	927	0.000462102	1	2	2.76771e-06	NA	1	2.83285e-07	1	2	4.32179e-07	NA	NA	NA	NA	NA
IGIPLFFL	ATTGGTATTCCGCTCTTCTTTCTA	WT	3104	3105	0.000834469	1004	1005	0.000742952	4578	4579	0.000732169	NA	NA	NA	NA	NA	NA	NA	NA	NA	1776	1777	0.000377738	834	835	0.000386585	304	305	0.000381681	1328	1329	0.000715207	542	543	0.000270681	310	311	0.000430379	2746	2747	0.000778184	8607	8608	0.0018601	NA	NA	NA	NA	NA
IGIRLNEL	ATTGGGATCAGGCTTAATGAGCTC	WT	627	628	0.000168775	245	246	0.000181857	1247	1248	0.000199552	NA	NA	NA	NA	NA	NA	NA	NA	NA	419	420	8.92796e-05	203	204	9.44471e-05	83	84	0.000105119	16	17	9.14862e-06	173	174	8.67375e-05	10	11	1.52224e-05	8610	8611	0.00243937	25	26	5.61833e-06	NA	NA	NA	NA	NA
IGIYHVLM	ATCGGGATTTACCACGTCCTCATG	WT	431	432	0.0001161	197	198	0.000146373	824	825	0.000131915	NA	NA	NA	NA	NA	NA	NA	NA	NA	269	270	5.7394e-05	116	117	5.41682e-05	36	37	4.63023e-05	37	38	2.04499e-05	83	84	4.18733e-05	8	9	1.24547e-05	197	198	5.60904e-05	496	497	0.000107396	NA	NA	NA	NA	NA
IGKIFSNI	ATCGGCAAAATATTTTCAAATATC	WT	224	225	6.04687e-05	82	83	6.13582e-05	411	412	6.58776e-05	NA	NA	NA	NA	NA	NA	NA	NA	NA	172	173	3.67747e-05	53	54	2.50007e-05	31	32	4.00452e-05	39	40	2.15262e-05	6	7	3.48944e-06	4	5	6.91928e-06	361	362	0.000102549	23	24	5.18615e-06	NA	NA	NA	NA	NA
IGKIQANL	ATAGGGAAGATTCAGGCGAATCTA	WT	533	534	0.000143512	216	217	0.000160418	939	940	0.000150303	NA	NA	NA	NA	NA	NA	NA	NA	NA	359	360	7.65253e-05	156	157	7.26872e-05	75	76	9.51074e-05	248	249	0.000134	84	85	4.23718e-05	1	2	2.76771e-06	1574	1575	0.000446174	117	118	2.54986e-05	NA	NA	NA	NA	NA
IGKRFGPF	ATTGGTAAACGATTTGGACCCTTC	WT	549	550	0.000147812	180	181	0.000133805	854	855	0.000136712	NA	NA	NA	NA	NA	NA	NA	NA	NA	351	352	7.48248e-05	127	128	5.92609e-05	52	53	6.63249e-05	25	26	1.3992e-05	987	988	0.00049251	39	40	5.53542e-05	120	121	3.42775e-05	37	38	8.2114e-06	NA	NA	NA	NA	NA
IGLGSAPL	ATCGGTCTAGGGTCCGCACCCCTA	WT	105	106	2.84875e-05	47	48	3.54843e-05	255	256	4.09337e-05	NA	NA	NA	NA	NA	NA	NA	NA	NA	66	67	1.42422e-05	31	32	1.48152e-05	12	13	1.62684e-05	5	6	3.22893e-06	543	544	0.000271179	NA	1	1.38386e-06	NA	1	2.83285e-07	2	3	6.48269e-07	NA	NA	NA	NA	NA
IGLHGLGL	ATTGGGCTCCACGGCCTTGGGCTG	WT	183	184	4.945e-05	60	61	4.50946e-05	196	197	3.14997e-05	NA	NA	NA	NA	NA	NA	NA	NA	NA	53	54	1.14788e-05	40	41	1.8982e-05	22	23	2.87825e-05	4	5	2.69077e-06	727	728	0.000362902	38	39	5.39703e-05	669	670	0.000189801	753	754	0.000162931	NA	NA	NA	NA	NA
IGLPYVEI	ATTGGTTTACCCTACGTGGAGATC	WT	124	125	3.35937e-05	73	74	5.47049e-05	330	331	5.29259e-05	NA	NA	NA	NA	NA	NA	NA	NA	NA	111	112	2.38079e-05	63	64	2.96305e-05	16	17	2.1274e-05	4	5	2.69077e-06	3	4	1.99397e-06	1	2	2.76771e-06	34	35	9.91497e-06	38	39	8.42749e-06	NA	NA	NA	NA	NA
IGLRISPL	ATTGGTTTACGTATCTCGCCTCTA	WT	760	761	0.000204519	240	241	0.000178161	1308	1309	0.000209305	NA	NA	NA	NA	NA	NA	NA	NA	NA	424	425	9.03424e-05	197	198	9.16693e-05	74	75	9.38559e-05	186	187	0.000100635	NA	1	4.98492e-07	NA	1	1.38386e-06	55	56	1.5864e-05	187	188	4.06248e-05	NA	NA	NA	NA	NA
IGLWSAFM	ATAGGACTTTGGAGTGCCTTTATG	WT	162	163	4.38062e-05	47	48	3.54843e-05	324	325	5.19666e-05	NA	NA	NA	NA	NA	NA	NA	NA	NA	118	119	2.52959e-05	55	56	2.59267e-05	16	17	2.1274e-05	5	6	3.22893e-06	5	6	2.99095e-06	NA	1	1.38386e-06	617	618	0.00017507	43	44	9.50794e-06	NA	NA	NA	NA	NA
IGLYFAWL	ATAGGTCTATATTTTGCGTGGTTA	WT	387	388	0.000104275	161	162	0.000119759	668	669	0.000106971	NA	NA	NA	NA	NA	NA	NA	NA	NA	297	298	6.3346e-05	108	109	5.04644e-05	62	63	7.8839e-05	4	5	2.69077e-06	19	20	9.96983e-06	1	2	2.76771e-06	3	4	1.13314e-06	11	12	2.59307e-06	NA	NA	NA	NA	NA
IGMKYRSV	ATAGGTATGAAGTACCGCTCAGTC	WT	122	123	3.30562e-05	44	45	3.32665e-05	300	301	4.8129e-05	NA	NA	NA	NA	NA	NA	NA	NA	NA	84	85	1.80685e-05	25	26	1.20374e-05	13	14	1.75198e-05	24	25	1.34539e-05	20	21	1.04683e-05	NA	1	1.38386e-06	7	8	2.26628e-06	31	32	6.91486e-06	NA	NA	NA	NA	NA
IGMLLFTI	ATTGGCATGCTTTTGTTTACAATT	WT	1194	1195	0.000321156	432	433	0.000320098	1847	1848	0.00029549	NA	NA	NA	NA	NA	NA	NA	NA	NA	752	753	0.000160066	354	355	0.000164356	112	113	0.00014141	586	587	0.000315897	737	738	0.000367887	121	122	0.00016883	169	170	4.81584e-05	3348	3349	0.000723684	NA	NA	NA	NA	NA
IGMLNNPM	ATAGGAATGCTAAATAATCCAATG	WT	1215	1216	0.0003268	434	435	0.000321576	1972	1973	0.000315477	NA	NA	NA	NA	NA	NA	NA	NA	NA	682	683	0.000145186	280	281	0.000130096	119	120	0.00015017	135	136	7.3189e-05	83	84	4.18733e-05	10	11	1.52224e-05	173	174	4.92916e-05	443	444	9.59437e-05	NA	NA	NA	NA	NA
IGPEYKNI	ATTGGGCCTGAATACAAGAACATA	WT	392	393	0.000105619	180	181	0.000133805	779	780	0.00012472	NA	NA	NA	NA	NA	NA	NA	NA	NA	276	277	5.8882e-05	118	119	5.50941e-05	49	50	6.25706e-05	852	853	0.000459046	5	6	2.99095e-06	NA	1	1.38386e-06	482	483	0.000136827	384	385	8.31945e-05	NA	NA	NA	NA	NA
IGQKFSSL	ATCGGCCAAAAGTTCTCGAGTTTA	WT	180	181	4.86437e-05	76	77	5.69227e-05	414	415	6.63573e-05	NA	NA	NA	NA	NA	NA	NA	NA	NA	107	108	2.29576e-05	44	45	2.08339e-05	25	26	3.25367e-05	13	14	7.53416e-06	44	45	2.24321e-05	29	30	4.15157e-05	1926	1927	0.00054589	1	2	4.32179e-07	NA	NA	NA	NA	NA
IGQQFAQM	ATCGGTCAACAGTTCGCTCAAATG	WT	707	708	0.000190275	184	185	0.000136762	1250	1251	0.000200031	NA	NA	NA	NA	NA	NA	NA	NA	NA	410	411	8.73664e-05	197	198	9.16693e-05	66	67	8.38446e-05	97	98	5.27391e-05	36	37	1.84442e-05	33	34	4.70511e-05	54	55	1.55807e-05	119	120	2.59307e-05	NA	NA	NA	NA	NA
IGQRLLTL	ATCGGTCAGCGACTATTGACCCTG	WT	892	893	0.000239994	371	372	0.000275003	1595	1596	0.000255196	NA	NA	NA	NA	NA	NA	NA	NA	NA	605	606	0.000128818	212	213	9.86139e-05	73	74	9.26045e-05	169	170	9.14862e-05	1664	1665	0.000829988	26	27	3.73641e-05	46	47	1.33144e-05	4259	4260	0.000920541	NA	NA	NA	NA	NA
IGRAIPNL	ATTGGTCGAGCTATACCGAATCTG	WT	186	187	5.02562e-05	72	73	5.39657e-05	494	495	7.91491e-05	NA	NA	NA	NA	NA	NA	NA	NA	NA	151	152	3.23107e-05	58	59	2.73156e-05	19	20	2.50283e-05	5	6	3.22893e-06	NA	1	4.98492e-07	15	16	2.21417e-05	217	218	6.17561e-05	54	55	1.18849e-05	NA	NA	NA	NA	NA
IGRAVMYL	ATCGGCCGCGCCGTAATGTACTTA	WT	13	14	3.7625e-06	8	9	6.6533e-06	85	86	1.37512e-05	NA	NA	NA	NA	NA	NA	NA	NA	NA	21	22	4.67655e-06	4	5	2.31488e-06	1	2	2.50283e-06	NA	1	5.38154e-07	13	14	6.97888e-06	10	11	1.52224e-05	NA	1	2.83285e-07	NA	1	2.1609e-07	NA	NA	NA	NA	NA
IGSTYQHL	ATCGGTTCTACCTATCAGCATCTG	WT	718	719	0.000193231	358	359	0.000265393	1320	1321	0.000211224	NA	NA	NA	NA	NA	NA	NA	NA	NA	463	464	9.86327e-05	202	203	9.39841e-05	59	60	7.50848e-05	18	19	1.02249e-05	46	47	2.34291e-05	2	3	4.15157e-06	489	490	0.00013881	1016	1017	0.000219763	NA	NA	NA	NA	NA
IGTFSMNL	ATTGGAACATTCTCCATGAATCTA	WT	709	710	0.000190812	293	294	0.000217341	1441	1442	0.000230572	NA	NA	NA	NA	NA	NA	NA	NA	NA	541	542	0.000115213	242	243	0.000112503	94	95	0.000118884	168	169	9.09481e-05	61	62	3.09065e-05	8	9	1.24547e-05	228	229	6.48722e-05	70	71	1.53424e-05	NA	NA	NA	NA	NA
IGTVFEVL	ATAGGGACCGTGTTCGAGGTGCTT	WT	271	272	7.31e-05	118	119	8.79714e-05	432	433	6.92354e-05	NA	NA	NA	NA	NA	NA	NA	NA	NA	149	150	3.18856e-05	80	81	3.75011e-05	31	32	4.00452e-05	844	845	0.00045474	NA	1	4.98492e-07	1	2	2.76771e-06	133	134	3.79602e-05	5	6	1.29654e-06	NA	NA	NA	NA	NA
IGVFNASV	ATCGGGGTCTTCAACGCATCCGTC	WT	164	165	4.43437e-05	65	66	4.87909e-05	337	338	5.40452e-05	NA	NA	NA	NA	NA	NA	NA	NA	NA	140	141	2.99724e-05	49	50	2.31488e-05	15	16	2.00226e-05	2742	2743	0.00147616	10	11	5.48341e-06	38	39	5.39703e-05	3	4	1.13314e-06	19	20	4.32179e-06	NA	NA	NA	NA	NA
IGVFSPSL	ATAGGAGTCTTCTCGCCAAGCCTT	WT	684	685	0.000184094	280	281	0.000207731	1150	1151	0.000184042	NA	NA	NA	NA	NA	NA	NA	NA	NA	412	413	8.77916e-05	196	197	9.12063e-05	83	84	0.000105119	576	577	0.000310515	55	56	2.79155e-05	618	619	0.000856606	558	559	0.000158356	4338	4339	0.000937612	NA	NA	NA	NA	NA
IGWGFPAV	ATAGGGTGGGGATTCCCCGCAGTT	WT	165	166	4.46125e-05	67	68	5.02694e-05	286	287	4.58905e-05	NA	NA	NA	NA	NA	NA	NA	NA	NA	95	96	2.04068e-05	49	50	2.31488e-05	17	18	2.25254e-05	205	206	0.00011086	6	7	3.48944e-06	NA	1	1.38386e-06	1289	1290	0.000365438	18	19	4.1057e-06	NA	NA	NA	NA	NA
IGYASSSL	ATTGGGTACGCGTCTAGTTCTTTA	WT	989	990	0.000266062	368	369	0.000272785	1705	1706	0.000272784	NA	NA	NA	NA	NA	NA	NA	NA	NA	559	560	0.000119039	279	280	0.000129633	79	80	0.000100113	550	551	0.000296523	1652	1653	0.000824007	8	9	1.24547e-05	658	659	0.000186685	554	555	0.00011993	NA	NA	NA	NA	NA
IGYDIYNI	ATCGGGTATGATATCTATAATATA	WT	1185	1186	0.000318737	471	472	0.000348929	1817	1818	0.000290693	NA	NA	NA	NA	NA	NA	NA	NA	NA	754	755	0.000160491	312	313	0.000144911	120	121	0.000151421	1592	1593	0.00085728	392	393	0.000195907	71	72	9.96376e-05	317	318	9.00846e-05	910	911	0.000196858	NA	NA	NA	NA	NA
IGYFSLFL	ATTGGGTACTTCTCTCTATTTCTG	WT	655	656	0.0001763	260	261	0.000192946	1173	1174	0.000187719	NA	NA	NA	NA	NA	NA	NA	NA	NA	491	492	0.000104585	222	223	0.000103244	84	85	0.00010637	114	115	6.18877e-05	645	646	0.000322026	5	6	8.30313e-06	429	430	0.000121813	568	569	0.000122955	NA	NA	NA	NA	NA
IGYQVTAM	ATAGGCTATCAGGTTACCGCGATG	WT	51	52	1.3975e-05	11	12	8.87107e-06	107	108	1.72689e-05	NA	NA	NA	NA	NA	NA	NA	NA	NA	23	24	5.10169e-06	22	23	1.06484e-05	9	10	1.25141e-05	NA	1	5.38154e-07	NA	1	4.98492e-07	NA	1	1.38386e-06	NA	1	2.83285e-07	NA	1	2.1609e-07	NA	NA	NA	NA	NA
IGYVYRLP	ATTGGGTACGTCTACCGACTTCCA	WT	648	649	0.000174419	207	208	0.000153765	1030	1031	0.000164854	NA	NA	NA	NA	NA	NA	NA	NA	NA	421	422	8.97047e-05	177	178	8.24097e-05	63	64	8.00904e-05	1604	1605	0.000863738	163	164	8.17526e-05	6	7	9.68699e-06	193	194	5.49573e-05	935	936	0.00020226	NA	NA	NA	NA	NA
IHFFYLSV	ATTCACTTCTTCTACTTATCCGTT	WT	2868	2869	0.000771044	952	953	0.000704511	4062	4063	0.000649662	NA	NA	NA	NA	NA	NA	NA	NA	NA	1693	1694	0.000360094	821	822	0.000380566	266	267	0.000334127	842	843	0.000453664	820	821	0.000409262	563	564	0.000780494	566	567	0.000160623	1757	1758	0.000379885	NA	NA	NA	NA	NA
IHFVRVLF	ATACACTTTGTAAGAGTACTATTT	WT	445	446	0.000119862	148	149	0.000110149	767	768	0.000122801	NA	NA	NA	NA	NA	NA	NA	NA	NA	225	226	4.80409e-05	136	137	6.34277e-05	40	41	5.13079e-05	1223	1224	0.000658701	167	168	8.37466e-05	1	2	2.76771e-06	162	163	4.61754e-05	293	294	6.35303e-05	NA	NA	NA	NA	NA
IHHFYCDV	ATACATCACTTTTATTGTGATGTG	WT	355	356	9.5675e-05	114	115	8.50144e-05	537	538	8.60246e-05	NA	NA	NA	NA	NA	NA	NA	NA	NA	238	239	5.08043e-05	105	106	4.90755e-05	41	42	5.25593e-05	47	48	2.58314e-05	267	268	0.000133596	NA	1	1.38386e-06	159	160	4.53256e-05	12	13	2.80916e-06	NA	NA	NA	NA	NA
IHMLFCAL	ATACATATGCTGTTTTGCGCTCTG	WT	375	376	0.00010105	124	125	9.2407e-05	611	612	9.7857e-05	NA	NA	NA	NA	NA	NA	NA	NA	NA	243	244	5.18672e-05	112	113	5.23163e-05	43	44	5.50622e-05	108	109	5.86588e-05	6	7	3.48944e-06	NA	1	1.38386e-06	1	2	5.6657e-07	218	219	4.73236e-05	NA	NA	NA	NA	NA
IHMVELYL	ATACACATGGTTGAACTCTATCTA	WT	298	299	8.03562e-05	135	136	0.000100539	489	490	7.83496e-05	NA	NA	NA	NA	NA	NA	NA	NA	NA	251	252	5.35677e-05	84	85	3.9353e-05	28	29	3.6291e-05	369	370	0.000199117	621	622	0.000310062	5	6	8.30313e-06	437	438	0.000124079	197	198	4.27857e-05	NA	NA	NA	NA	NA
IHNFSPLL	ATCCACAATTTCTCTCCGTTACTA	WT	675	676	0.000181675	214	215	0.00015894	1209	1210	0.000193475	NA	NA	NA	NA	NA	NA	NA	NA	NA	371	372	7.90762e-05	196	197	9.12063e-05	81	82	0.000102616	72	73	3.92853e-05	340	341	0.000169986	98	99	0.000137002	602	603	0.000170821	63	64	1.38297e-05	NA	NA	NA	NA	NA
IHYFRKEL	ATACATTATTTCCGGAAGGAGTTA	WT	885	886	0.000238112	326	327	0.000241737	1450	1451	0.000232011	NA	NA	NA	NA	NA	NA	NA	NA	NA	547	548	0.000116489	248	249	0.000115281	76	77	9.63588e-05	503	504	0.00027123	23	24	1.19638e-05	10	11	1.52224e-05	119	120	3.39942e-05	830	831	0.00017957	NA	NA	NA	NA	NA
IHYHLQLI	ATCCATTATCATCTACAGTTGATC	WT	NA	1	2.6875e-07	NA	1	7.39256e-07	NA	1	1.59897e-07	NA	NA	NA	NA	NA	NA	NA	NA	NA	NA	1	2.1257e-07	NA	1	4.62976e-07	NA	1	1.25141e-06	NA	1	5.38154e-07	NA	1	4.98492e-07	NA	1	1.38386e-06	NA	1	2.83285e-07	NA	1	2.1609e-07	NA	NA	NA	NA	NA
IHYRLRLV	ATCCATTACCGTCTGAGACTGGTC	WT	385	386	0.000103737	159	160	0.000118281	784	785	0.000125519	NA	NA	NA	NA	NA	NA	NA	NA	NA	233	234	4.97415e-05	96	97	4.49087e-05	47	48	6.00678e-05	44	45	2.42169e-05	22	23	1.14653e-05	1	2	2.76771e-06	8	9	2.54956e-06	144	145	3.1333e-05	NA	NA	NA	NA	NA
IIADFTGV	ATAATTGCTGATTTCACTGGAGTC	WT	NA	1	2.6875e-07	NA	1	7.39256e-07	NA	1	1.59897e-07	NA	NA	NA	NA	NA	NA	NA	NA	NA	NA	1	2.1257e-07	NA	1	4.62976e-07	NA	1	1.25141e-06	NA	1	5.38154e-07	NA	1	4.98492e-07	NA	1	1.38386e-06	NA	1	2.83285e-07	NA	1	2.1609e-07	NA	NA	NA	NA	NA
IIASYAFI	ATTATTGCTAGTTACGCGTTTATT	WT	2503	2504	0.00067295	938	939	0.000694161	4048	4049	0.000647423	NA	NA	NA	NA	NA	NA	NA	NA	NA	1481	1482	0.000315029	751	752	0.000348158	298	299	0.000374172	598	599	0.000322354	1198	1199	0.000597691	121	122	0.00016883	4647	4648	0.00131671	3584	3585	0.000774681	NA	NA	NA	NA	NA
IICSFRRI	ATTATATGTTCGTTCCGTCGAATA	WT	1406	1407	0.000378131	525	526	0.000388848	2188	2189	0.000350015	NA	NA	NA	NA	NA	NA	NA	NA	NA	757	758	0.000161128	369	370	0.000171301	125	126	0.000157678	89	90	4.84339e-05	102	103	5.13446e-05	46	47	6.50412e-05	689	690	0.000195467	535	536	0.000115824	NA	NA	NA	NA	NA
IIFAFWVV	ATAATCTTTGCATTTTGGGTGGTT	WT	1493	1494	0.000401512	574	575	0.000425072	2451	2452	0.000392068	NA	NA	NA	NA	NA	NA	NA	NA	NA	913	914	0.000194289	399	400	0.00018519	152	153	0.000191466	2384	2385	0.0012835	2276	2277	0.00113507	7	8	1.10708e-05	509	510	0.000144475	1958	1959	0.000423319	NA	NA	NA	NA	NA
IIFHAFFI	ATCATATTTCACGCCTTCTTCATT	WT	900	901	0.000242144	279	280	0.000206992	1478	1479	0.000236488	NA	NA	NA	NA	NA	NA	NA	NA	NA	551	552	0.000117339	246	247	0.000114355	112	113	0.00014141	465	466	0.00025078	254	255	0.000127115	162	163	0.000225568	337	338	9.57503e-05	308	309	6.67717e-05	NA	NA	NA	NA	NA
IIFISLVL	ATAATATTCATTTCACTGGTCCTC	WT	2006	2007	0.000539381	723	724	0.000535221	2875	2876	0.000459864	NA	NA	NA	NA	NA	NA	NA	NA	NA	1193	1194	0.000253809	589	590	0.000273156	237	238	0.000297836	775	776	0.000417608	1237	1238	0.000617133	1285	1286	0.00177964	4339	4340	0.00122946	5395	5396	0.00116602	NA	NA	NA	NA	NA
IIFLLIYI	ATAATCTTTCTACTTATTTATATC	WT	4325	4326	0.00116261	1453	1454	0.00107488	6163	6164	0.000985606	NA	NA	NA	NA	NA	NA	NA	NA	NA	2711	2712	0.000576491	1314	1315	0.000608813	440	441	0.000551873	1956	1957	0.00105317	3098	3099	0.00154483	1252	1253	0.00173397	4324	4325	0.00122521	3769	3770	0.000814657	NA	NA	NA	NA	NA
IIFLTTLF	ATAATCTTTCTAACGACTTTGTTT	WT	637	638	0.000171462	288	289	0.000213645	1177	1178	0.000188359	NA	NA	NA	NA	NA	NA	NA	NA	NA	454	455	9.67195e-05	234	235	0.000108799	83	84	0.000105119	81	82	4.41287e-05	91	92	4.58612e-05	93	94	0.000130082	92	93	2.63455e-05	275	276	5.96407e-05	NA	NA	NA	NA	NA
IIFLVQLM	ATTATCTTCCTTGTTCAACTAATG	WT	795	796	0.000213925	224	225	0.000166333	1082	1083	0.000173169	NA	NA	NA	NA	NA	NA	NA	NA	NA	487	488	0.000103734	216	217	0.000100466	66	67	8.38446e-05	147	148	7.96468e-05	99	100	4.98492e-05	1	2	2.76771e-06	35	36	1.01983e-05	4117	4118	0.000889857	NA	NA	NA	NA	NA
IIFRQESF	ATAATTTTCCGCCAGGAATCTTTT	WT	304	305	8.19687e-05	117	118	8.72322e-05	477	478	7.64308e-05	NA	NA	NA	NA	NA	NA	NA	NA	NA	174	175	3.71998e-05	89	90	4.16678e-05	37	38	4.75537e-05	76	77	4.14379e-05	83	84	4.18733e-05	1	2	2.76771e-06	40	41	1.16147e-05	68	69	1.49102e-05	NA	NA	NA	NA	NA
IIFSIISL	ATCATCTTCTCTATTATATCTCTA	WT	3170	3171	0.000852206	1159	1160	0.000857537	4681	4682	0.000748638	NA	NA	NA	NA	NA	NA	NA	NA	NA	1882	1883	0.00040027	939	940	0.000435197	295	296	0.000370418	1652	1653	0.000889569	554	555	0.000276663	162	163	0.000225568	1381	1382	0.0003915	1788	1789	0.000386584	NA	NA	NA	NA	NA
IIFSNGEL	ATTATATTTTCCAACGGCGAGTTG	WT	535	536	0.00014405	194	195	0.000144155	857	858	0.000137192	NA	NA	NA	NA	NA	NA	NA	NA	NA	327	328	6.97231e-05	145	146	6.75945e-05	44	45	5.63136e-05	87	88	4.73576e-05	75	76	3.78854e-05	3	4	5.53542e-06	74	75	2.12464e-05	978	979	0.000211552	NA	NA	NA	NA	NA
IIFSYTRI	ATAATCTTTTCTTACACGCGGATT	WT	468	469	0.000126044	172	173	0.000127891	777	778	0.0001244	NA	NA	NA	NA	NA	NA	NA	NA	NA	275	276	5.86694e-05	122	123	5.69461e-05	61	62	7.75876e-05	27	28	1.50683e-05	56	57	2.8414e-05	19	20	2.76771e-05	48	49	1.3881e-05	109	110	2.37698e-05	NA	NA	NA	NA	NA
IIFYRDGV	ATCATTTTCTACCGTGATGGCGTA	WT	397	398	0.000106962	142	143	0.000105714	734	735	0.000117524	NA	NA	NA	NA	NA	NA	NA	NA	NA	244	245	5.20797e-05	138	139	6.43537e-05	43	44	5.50622e-05	51	52	2.7984e-05	331	332	0.000165499	2	3	4.15157e-06	12	13	3.6827e-06	104	105	2.26894e-05	NA	NA	NA	NA	NA
IIHRHKPM	ATCATTCACCGCCATAAACCAATG	WT	596	597	0.000160444	183	184	0.000136023	944	945	0.000151103	NA	NA	NA	NA	NA	NA	NA	NA	NA	362	363	7.71631e-05	155	156	7.22243e-05	53	54	6.75763e-05	139	140	7.53416e-05	136	137	6.82933e-05	354	355	0.000491269	629	630	0.000178469	56	57	1.23171e-05	NA	NA	NA	NA	NA
IIHRYFDF	ATTATACATCGGTATTTTGACTTT	WT	409	410	0.000110187	166	167	0.000123456	740	741	0.000118484	NA	NA	NA	NA	NA	NA	NA	NA	NA	266	267	5.67563e-05	116	117	5.41682e-05	55	56	7.00791e-05	157	158	8.50284e-05	6	7	3.48944e-06	11	12	1.66063e-05	5	6	1.69971e-06	228	229	4.94845e-05	NA	NA	NA	NA	NA
IIILTGLL	ATAATAATCTTGACCGGATTACTT	WT	567	568	0.00015265	218	219	0.000161897	905	906	0.000144867	NA	NA	NA	NA	NA	NA	NA	NA	NA	356	357	7.58876e-05	166	167	7.7317e-05	61	62	7.75876e-05	7	8	4.30523e-06	1	2	9.96983e-07	20	21	2.9061e-05	567	568	0.000160906	1075	1076	0.000232512	NA	NA	NA	NA	NA
IIISHVRL	ATTATCATTTCGCACGTTCGTCTC	WT	673	674	0.000181137	238	239	0.000176682	1062	1063	0.000169971	NA	NA	NA	NA	NA	NA	NA	NA	NA	427	428	9.09801e-05	182	183	8.47246e-05	61	62	7.75876e-05	108	109	5.86588e-05	36	37	1.84442e-05	13	14	1.9374e-05	681	682	0.0001932	822	823	0.000177842	NA	NA	NA	NA	NA
IIKAFRNI	ATAATCAAGGCGTTTCGAAACATC	WT	168	169	4.54187e-05	79	80	5.91405e-05	362	363	5.80426e-05	NA	NA	NA	NA	NA	NA	NA	NA	NA	136	137	2.91221e-05	76	77	3.56492e-05	38	39	4.88051e-05	20	21	1.13012e-05	18	19	9.47134e-06	7	8	1.10708e-05	92	93	2.63455e-05	1287	1288	0.000278323	NA	NA	NA	NA	NA
IIKTHLPL	ATTATTAAGACTCATTTACCGTTA	WT	583	584	0.00015695	180	181	0.000133805	871	872	0.00013943	NA	NA	NA	NA	NA	NA	NA	NA	NA	285	286	6.07951e-05	151	152	7.03724e-05	61	62	7.75876e-05	994	995	0.000535464	12	13	6.48039e-06	4	5	6.91928e-06	33	34	9.63169e-06	59	60	1.29654e-05	NA	NA	NA	NA	NA
IILETIRL	ATAATTCTGGAAACCATTAGGCTC	WT	551	552	0.00014835	211	212	0.000156722	1011	1012	0.000161816	NA	NA	NA	NA	NA	NA	NA	NA	NA	309	310	6.58968e-05	153	154	7.12983e-05	44	45	5.63136e-05	624	625	0.000336346	10	11	5.48341e-06	1	2	2.76771e-06	117	118	3.34276e-05	5207	5208	0.00112539	NA	NA	NA	NA	NA
IILFYQKV	ATTATTTTGTTTTATCAGAAAGTG	WT	803	804	0.000216075	296	297	0.000219559	1082	1083	0.000173169	NA	NA	NA	NA	NA	NA	NA	NA	NA	429	430	9.14053e-05	214	215	9.95398e-05	91	92	0.00011513	9	10	5.38154e-06	4	5	2.49246e-06	52	53	7.33443e-05	846	847	0.000239942	147	148	3.19812e-05	NA	NA	NA	NA	NA
IILGSYLL	ATTATATTGGGGTCCTACCTTCTA	WT	366	367	9.86312e-05	146	147	0.000108671	725	726	0.000116085	NA	NA	NA	NA	NA	NA	NA	NA	NA	290	291	6.1858e-05	99	100	4.62976e-05	31	32	4.00452e-05	17	18	9.68678e-06	41	42	2.09366e-05	164	165	0.000228336	231	232	6.57221e-05	43	44	9.50794e-06	NA	NA	NA	NA	NA
IILIFYSL	ATAATCTTGATATTCTACAGTCTA	WT	989	990	0.000266062	404	405	0.000299399	1635	1636	0.000261592	NA	NA	NA	NA	NA	NA	NA	NA	NA	657	658	0.000139871	281	282	0.000130559	125	126	0.000157678	108	109	5.86588e-05	1155	1156	0.000576256	47	48	6.6425e-05	840	841	0.000238243	336	337	7.28222e-05	NA	NA	NA	NA	NA
IILLFFVM	ATTATACTATTGTTCTTCGTGATG	WT	3642	3643	0.000979056	1456	1457	0.0010771	5570	5571	0.000890787	NA	NA	NA	NA	NA	NA	NA	NA	NA	2250	2251	0.000478496	1047	1048	0.000485199	398	399	0.000499314	1513	1514	0.000814766	1511	1512	0.000753719	200	201	0.000278155	1420	1421	0.000402548	2362	2363	0.00051062	NA	NA	NA	NA	NA
IILLLAYV	ATCATTTTATTATTAGCTTATGTC	WT	1141	1142	0.000306912	405	406	0.000300138	1528	1529	0.000244483	NA	NA	NA	NA	NA	NA	NA	NA	NA	718	719	0.000152838	339	340	0.000157412	88	89	0.000111376	202	203	0.000109245	376	377	0.000187931	63	64	8.85667e-05	743	744	0.000210764	709	710	0.000153424	NA	NA	NA	NA	NA
IILLNFCL	ATAATCCTCTTGAACTTTTGTTTA	WT	1611	1612	0.000433225	530	531	0.000392545	2447	2448	0.000391428	NA	NA	NA	NA	NA	NA	NA	NA	NA	930	931	0.000197903	438	439	0.000203246	147	148	0.000185209	68	69	3.71326e-05	623	624	0.000311059	43	44	6.08896e-05	1292	1293	0.000366287	670	671	0.000144996	NA	NA	NA	NA	NA
IILNFRTT	ATAATACTTAATTTTCGTACAACA	WT	195	196	5.2675e-05	63	64	4.73124e-05	350	351	5.61239e-05	NA	NA	NA	NA	NA	NA	NA	NA	NA	96	97	2.06193e-05	54	55	2.54637e-05	30	31	3.87938e-05	3	4	2.15262e-06	2	3	1.49547e-06	1	2	2.76771e-06	18	19	5.38241e-06	724	725	0.000156665	NA	NA	NA	NA	NA
IILPPTRL	ATCATTCTCCCTCCCACGCGGCTG	WT	58	59	1.58562e-05	22	23	1.70029e-05	89	90	1.43907e-05	NA	NA	NA	NA	NA	NA	NA	NA	NA	36	37	7.8651e-06	13	14	6.48166e-06	6	7	8.75989e-06	82	83	4.46668e-05	11	12	5.9819e-06	NA	1	1.38386e-06	3	4	1.13314e-06	9	10	2.1609e-06	NA	NA	NA	NA	NA
IILSLLPM	ATTATCCTATCTCTACTACCAATG	WT	1032	1033	0.000277619	409	410	0.000303095	1822	1823	0.000291492	NA	NA	NA	NA	NA	NA	NA	NA	NA	644	645	0.000137108	316	317	0.000146763	93	94	0.000117633	110	111	5.97351e-05	226	227	0.000113158	58	59	8.16475e-05	3901	3902	0.00110538	4207	4208	0.000909305	NA	NA	NA	NA	NA
IILSYCKI	ATCATACTAAGCTATTGCAAGATA	WT	350	351	9.43312e-05	87	88	6.50545e-05	577	578	9.24205e-05	NA	NA	NA	NA	NA	NA	NA	NA	NA	235	236	5.01666e-05	91	92	4.25938e-05	31	32	4.00452e-05	52	53	2.85222e-05	15	16	7.97587e-06	29	30	4.15157e-05	15	16	4.53256e-06	483	484	0.000104587	NA	NA	NA	NA	NA
IILTESLL	ATAATACTGACGGAGAGTCTCTTA	WT	410	411	0.000110456	163	164	0.000121238	725	726	0.000116085	NA	NA	NA	NA	NA	NA	NA	NA	NA	243	244	5.18672e-05	121	122	5.64831e-05	48	49	6.13192e-05	57	58	3.1213e-05	2	3	1.49547e-06	1	2	2.76771e-06	3	4	1.13314e-06	691	692	0.000149534	NA	NA	NA	NA	NA
IILVSSSL	ATCATTCTTGTCTCTAGTTCACTA	WT	676	677	0.000181944	238	239	0.000176682	919	920	0.000147105	NA	NA	NA	NA	NA	NA	NA	NA	NA	366	367	7.80133e-05	162	163	7.54651e-05	55	56	7.00791e-05	90	91	4.8972e-05	976	977	0.000487026	3	4	5.53542e-06	476	477	0.000135127	1070	1071	0.000231432	NA	NA	NA	NA	NA
IIMASGEL	ATTATTATGGCTTCTGGCGAACTA	WT	1009	1010	0.000271437	362	363	0.00026835	1683	1684	0.000269267	NA	NA	NA	NA	NA	NA	NA	NA	NA	580	581	0.000123503	279	280	0.000129633	99	100	0.000125141	53	54	2.90603e-05	1039	1040	0.000518431	160	161	0.000222801	62	63	1.78469e-05	570	571	0.000123387	NA	NA	NA	NA	NA
IIMILYHL	ATCATCATGATTCTATATCATCTC	WT	NA	1	2.6875e-07	NA	1	7.39256e-07	NA	1	1.59897e-07	NA	NA	NA	NA	NA	NA	NA	NA	NA	NA	1	2.1257e-07	NA	1	4.62976e-07	NA	1	1.25141e-06	1	2	1.07631e-06	NA	1	4.98492e-07	NA	1	1.38386e-06	NA	1	2.83285e-07	NA	1	2.1609e-07	NA	NA	NA	NA	NA
IINIFTFL	ATAATAAACATTTTCACATTTCTC	WT	1163	1164	0.000312825	371	372	0.000275003	1758	1759	0.000281259	NA	NA	NA	NA	NA	NA	NA	NA	NA	683	684	0.000145398	286	287	0.000132874	107	108	0.000135153	2088	2089	0.0011242	67	68	3.38974e-05	475	476	0.000658715	94	95	2.69121e-05	1020	1021	0.000220627	NA	NA	NA	NA	NA
IIPMINPL	ATTATACCCATGATCAATCCTCTG	WT	793	794	0.000213387	315	316	0.000233605	1178	1179	0.000188519	NA	NA	NA	NA	NA	NA	NA	NA	NA	511	512	0.000108836	217	218	0.000100929	69	70	8.75989e-05	18	19	1.02249e-05	88	89	4.43657e-05	14	15	2.07578e-05	31	32	9.06512e-06	300	301	6.50429e-05	NA	NA	NA	NA	NA
IIPPAAPL	ATAATCCCACCCGCCGCCCCTCTC	WT	157	158	4.24625e-05	64	65	4.80516e-05	279	280	4.47712e-05	NA	NA	NA	NA	NA	NA	NA	NA	NA	99	100	2.1257e-05	54	55	2.54637e-05	15	16	2.00226e-05	NA	1	5.38154e-07	3	4	1.99397e-06	1	2	2.76771e-06	73	74	2.09631e-05	117	118	2.54986e-05	NA	NA	NA	NA	NA
IIPRYRNF	ATTATACCTAGGTACCGGAATTTC	WT	369	370	9.94375e-05	170	171	0.000126413	685	686	0.000109689	NA	NA	NA	NA	NA	NA	NA	NA	NA	280	281	5.97323e-05	131	132	6.11128e-05	29	30	3.75424e-05	1900	1901	0.00102303	28	29	1.44563e-05	76	77	0.000106557	1460	1461	0.000413879	192	193	4.17053e-05	NA	NA	NA	NA	NA
IIPTIPLL	ATCATCCCGACAATACCGCTGCTC	WT	220	221	5.93937e-05	74	75	5.54442e-05	481	482	7.70704e-05	NA	NA	NA	NA	NA	NA	NA	NA	NA	124	125	2.65713e-05	45	46	2.12969e-05	34	35	4.37994e-05	438	439	0.00023625	NA	1	4.98492e-07	NA	1	1.38386e-06	7	8	2.26628e-06	955	956	0.000206582	NA	NA	NA	NA	NA
IIPWNGPL	ATAATCCCCTGGAATGGACCGCTG	WT	402	403	0.000108306	151	152	0.000112367	677	678	0.00010841	NA	NA	NA	NA	NA	NA	NA	NA	NA	219	220	4.67655e-05	93	94	4.35197e-05	49	50	6.25706e-05	102	103	5.54299e-05	540	541	0.000269684	44	45	6.22735e-05	267	268	7.59204e-05	283	284	6.13694e-05	NA	NA	NA	NA	NA
IIQEFPEI	ATTATCCAGGAGTTTCCTGAGATC	WT	537	538	0.000144587	200	201	0.00014859	838	839	0.000134154	NA	NA	NA	NA	NA	NA	NA	NA	NA	296	297	6.31334e-05	150	151	6.99094e-05	62	63	7.8839e-05	270	271	0.00014584	7	8	3.98793e-06	17	18	2.49094e-05	10	11	3.11613e-06	58	59	1.27493e-05	NA	NA	NA	NA	NA
IIRFFSKM	ATCATTCGATTCTTCTCAAAGATG	WT	372	373	0.000100244	186	187	0.000138241	667	668	0.000106811	NA	NA	NA	NA	NA	NA	NA	NA	NA	221	222	4.71906e-05	148	149	6.89834e-05	50	51	6.3822e-05	280	281	0.000151221	189	190	9.47134e-05	12	13	1.79901e-05	6	7	1.98299e-06	487	488	0.000105452	NA	NA	NA	NA	NA
IIRGLYHL	ATAATTAGAGGCTTATACCATTTG	WT	457	458	0.000123087	160	161	0.00011902	786	787	0.000125839	NA	NA	NA	NA	NA	NA	NA	NA	NA	288	289	6.14328e-05	108	109	5.04644e-05	52	53	6.63249e-05	197	198	0.000106555	57	58	2.89125e-05	4	5	6.91928e-06	25	26	7.36541e-06	13680	13681	0.00295632	NA	NA	NA	NA	NA
IISLLSQL	ATAATATCGCTGCTCTCACAGTTG	WT	292	293	7.87437e-05	138	139	0.000102757	553	554	8.8583e-05	NA	NA	NA	NA	NA	NA	NA	NA	NA	175	176	3.74124e-05	94	95	4.39827e-05	30	31	3.87938e-05	79	80	4.30523e-05	3	4	1.99397e-06	NA	1	1.38386e-06	105	106	3.00282e-05	40	41	8.85967e-06	NA	NA	NA	NA	NA
IISVFYTI	ATTATAAGCGTATTCTACACTATA	WT	532	533	0.000143244	190	191	0.000141198	713	714	0.000114167	NA	NA	NA	NA	NA	NA	NA	NA	NA	332	333	7.07859e-05	140	141	6.52796e-05	75	76	9.51074e-05	591	592	0.000318587	2	3	1.49547e-06	1	2	2.76771e-06	477	478	0.00013541	370	371	8.01692e-05	NA	NA	NA	NA	NA
IITFFTFL	ATCATAACCTTCTTCACATTTCTC	WT	708	709	0.000190544	268	269	0.00019886	978	979	0.000156539	NA	NA	NA	NA	NA	NA	NA	NA	NA	480	481	0.000102246	260	261	0.000120837	93	94	0.000117633	39	40	2.15262e-05	144	145	7.22813e-05	33	34	4.70511e-05	134	135	3.82435e-05	2254	2255	0.000487282	NA	NA	NA	NA	NA
IIVGMFLL	ATAATCGTGGGCATGTTCCTATTG	WT	645	646	0.000173612	281	282	0.00020847	1145	1146	0.000183242	NA	NA	NA	NA	NA	NA	NA	NA	NA	444	445	9.45938e-05	245	246	0.000113892	56	57	7.13305e-05	881	882	0.000474652	218	219	0.00010917	14	15	2.07578e-05	69	70	1.98299e-05	666	667	0.000144132	NA	NA	NA	NA	NA
IIVLSTLL	ATTATTGTCCTGTCCACTCTGTTA	WT	NA	1	2.6875e-07	NA	1	7.39256e-07	NA	1	1.59897e-07	NA	NA	NA	NA	NA	NA	NA	NA	NA	NA	1	2.1257e-07	NA	1	4.62976e-07	NA	1	1.25141e-06	NA	1	5.38154e-07	NA	1	4.98492e-07	NA	1	1.38386e-06	NA	1	2.83285e-07	NA	1	2.1609e-07	NA	NA	NA	NA	NA
IIVMLYHL	ATCATCGTGATGCTTTATCACTTG	WT	436	437	0.000117444	149	150	0.000110888	654	655	0.000104733	NA	NA	NA	NA	NA	NA	NA	NA	NA	271	272	5.78191e-05	117	118	5.46312e-05	40	41	5.13079e-05	154	155	8.34139e-05	41	42	2.09366e-05	NA	1	1.38386e-06	305	306	8.66852e-05	12	13	2.80916e-06	NA	NA	NA	NA	NA
IIVNFPSF	ATTATAGTGAACTTCCCTTCTTTC	WT	499	500	0.000134375	167	168	0.000124195	707	708	0.000113207	NA	NA	NA	NA	NA	NA	NA	NA	NA	257	258	5.48432e-05	144	145	6.71315e-05	46	47	5.88164e-05	69	70	3.76708e-05	164	165	8.22511e-05	11	12	1.66063e-05	4436	4437	0.00125694	291	292	6.30981e-05	NA	NA	NA	NA	NA
IIVSFVNA	ATTATTGTGTCCTTCGTAAATGCC	WT	357	358	9.62125e-05	130	131	9.68425e-05	620	621	9.92961e-05	NA	NA	NA	NA	NA	NA	NA	NA	NA	235	236	5.01666e-05	92	93	4.30568e-05	45	46	5.7565e-05	536	537	0.000288989	129	130	6.48039e-05	2	3	4.15157e-06	24	25	7.08212e-06	10904	10905	0.00235646	NA	NA	NA	NA	NA
IIVSSYAL	ATTATCGTTAGTAGCTACGCTTTG	WT	980	981	0.000263644	323	324	0.000239519	1701	1702	0.000272145	NA	NA	NA	NA	NA	NA	NA	NA	NA	583	584	0.000124141	272	273	0.000126392	95	96	0.000120136	71	72	3.87471e-05	93	94	4.68582e-05	151	152	0.000210346	739	740	0.000209631	226	227	4.90523e-05	NA	NA	NA	NA	NA
IIVSYFHI	ATCATTGTGAGTTACTTCCATATA	WT	4115	4116	0.00110617	1655	1656	0.00122421	6727	6728	0.00107579	NA	NA	NA	NA	NA	NA	NA	NA	NA	2730	2731	0.00058053	1152	1153	0.000533811	464	465	0.000581907	904	905	0.00048703	608	609	0.000303581	440	441	0.00061028	11324	11325	0.0032082	5289	5290	0.00114311	NA	NA	NA	NA	NA
IIVVIQNL	ATTATAGTTGTCATTCAAAACCTA	WT	318	319	8.57312e-05	135	136	0.000100539	500	501	8.01084e-05	NA	NA	NA	NA	NA	NA	NA	NA	NA	218	219	4.65529e-05	116	117	5.41682e-05	35	36	4.50509e-05	83	84	4.5205e-05	1016	1017	0.000506966	NA	1	1.38386e-06	80	81	2.29461e-05	221	222	4.79719e-05	NA	NA	NA	NA	NA
IIWHSLAL	ATAATATGGCATAGCTTAGCGCTT	WT	812	813	0.000218494	338	339	0.000250608	1397	1398	0.000223536	NA	NA	NA	NA	NA	NA	NA	NA	NA	500	501	0.000106498	238	239	0.000110651	92	93	0.000116381	190	191	0.000102787	1327	1328	0.000661997	4	5	6.91928e-06	1025	1026	0.00029065	604	605	0.000130734	NA	NA	NA	NA	NA
IIWLKENL	ATAATATGGCTTAAAGAGAATCTT	WT	308	309	8.30437e-05	132	133	9.8321e-05	476	477	7.62709e-05	NA	NA	NA	NA	NA	NA	NA	NA	NA	212	213	4.52775e-05	101	102	4.72236e-05	42	43	5.38107e-05	19	20	1.07631e-05	267	268	0.000133596	51	52	7.19605e-05	34	35	9.91497e-06	10	11	2.37698e-06	NA	NA	NA	NA	NA
IIWQCALL	ATCATATGGCAATGTGCCCTACTT	WT	432	433	0.000116369	153	154	0.000113845	753	754	0.000120562	NA	NA	NA	NA	NA	NA	NA	NA	NA	275	276	5.86694e-05	109	110	5.09274e-05	33	34	4.2548e-05	35	36	1.93736e-05	23	24	1.19638e-05	7	8	1.10708e-05	37	38	1.07648e-05	536	537	0.00011604	NA	NA	NA	NA	NA
IIWSSVSM	ATAATTTGGTCAAGTGTATCTATG	WT	132	133	3.57437e-05	39	40	2.95702e-05	264	265	4.23727e-05	NA	NA	NA	NA	NA	NA	NA	NA	NA	65	66	1.40296e-05	35	36	1.66671e-05	13	14	1.75198e-05	5	6	3.22893e-06	NA	1	4.98492e-07	29	30	4.15157e-05	7	8	2.26628e-06	106	107	2.31216e-05	NA	NA	NA	NA	NA
IIYIKVYM	ATCATATACATAAAAGTGTACATG	WT	315	316	8.4925e-05	134	135	9.97995e-05	580	581	9.29002e-05	NA	NA	NA	NA	NA	NA	NA	NA	NA	221	222	4.71906e-05	88	89	4.12049e-05	26	27	3.37881e-05	136	137	7.37271e-05	3	4	1.99397e-06	39	40	5.53542e-05	77	78	2.20962e-05	20	21	4.53788e-06	NA	NA	NA	NA	NA
IIYMTILL	ATTATCTACATGACCATACTACTT	WT	1511	1512	0.00040635	586	587	0.000433943	2586	2587	0.000413654	NA	NA	NA	NA	NA	NA	NA	NA	NA	840	841	0.000178772	431	432	0.000200006	158	159	0.000198975	1805	1806	0.000971907	369	370	0.000184442	27	28	3.87479e-05	59	60	1.69971e-05	1243	1244	0.000268815	NA	NA	NA	NA	NA
IIYMTSMV	ATTATATACATGACATCCATGGTT	WT	343	344	9.245e-05	147	148	0.00010941	554	555	8.87429e-05	NA	NA	NA	NA	NA	NA	NA	NA	NA	256	257	5.46306e-05	92	93	4.30568e-05	42	43	5.38107e-05	157	158	8.50284e-05	1	2	9.96983e-07	21	22	3.04448e-05	28	29	8.21526e-06	128	129	2.78755e-05	NA	NA	NA	NA	NA
IIYNFGMV	ATTATTTATAATTTTGGAATGGTA	WT	995	996	0.000267675	409	410	0.000303095	1631	1632	0.000260952	NA	NA	NA	NA	NA	NA	NA	NA	NA	677	678	0.000144123	323	324	0.000150004	95	96	0.000120136	79	80	4.30523e-05	197	198	9.87013e-05	21	22	3.04448e-05	318	319	9.03679e-05	649	650	0.000140458	NA	NA	NA	NA	NA
IIYNILLF	ATTATTTATAATATCCTACTCTTT	WT	2259	2260	0.000607375	804	805	0.000595101	2864	2865	0.000458105	NA	NA	NA	NA	NA	NA	NA	NA	NA	1228	1229	0.000261249	659	660	0.000305564	215	216	0.000270305	389	390	0.00020988	2586	2587	0.0012896	127	128	0.000177133	409	410	0.000116147	2484	2485	0.000536982	NA	NA	NA	NA	NA
IIYNNLGI	ATTATATACAACAACTTAGGGATC	WT	NA	1	2.6875e-07	NA	1	7.39256e-07	NA	1	1.59897e-07	NA	NA	NA	NA	NA	NA	NA	NA	NA	NA	1	2.1257e-07	NA	1	4.62976e-07	NA	1	1.25141e-06	NA	1	5.38154e-07	NA	1	4.98492e-07	NA	1	1.38386e-06	NA	1	2.83285e-07	NA	1	2.1609e-07	NA	NA	NA	NA	NA
IIYPLIVL	ATCATTTATCCCCTAATTGTACTT	WT	869	870	0.000233812	350	351	0.000259479	1432	1433	0.000229133	NA	NA	NA	NA	NA	NA	NA	NA	NA	567	568	0.00012074	294	295	0.000136578	106	107	0.000133901	164	165	8.87955e-05	78	79	3.93808e-05	62	63	8.71829e-05	316	317	8.98013e-05	447	448	9.68081e-05	NA	NA	NA	NA	NA
IIYRDTPV	ATAATCTATAGAGACACGCCGGTG	WT	38	39	1.04812e-05	6	7	5.17479e-06	81	82	1.31116e-05	NA	NA	NA	NA	NA	NA	NA	NA	NA	27	28	5.95197e-06	17	18	8.33357e-06	1	2	2.50283e-06	NA	1	5.38154e-07	NA	1	4.98492e-07	NA	1	1.38386e-06	NA	1	2.83285e-07	NA	1	2.1609e-07	NA	NA	NA	NA	NA
IIYSFSLL	ATAATTTATTCATTTTCCTTACTG	WT	3244	3245	0.000872094	1137	1138	0.000841273	4561	4562	0.000729451	NA	NA	NA	NA	NA	NA	NA	NA	NA	1967	1968	0.000418339	914	915	0.000423623	324	325	0.000406709	1674	1675	0.000901409	295	296	0.000147554	634	635	0.000878748	5584	5585	0.00158215	3687	3688	0.000796938	NA	NA	NA	NA	NA
IIYTLRNT	ATAATTTATACGCTCCGTAACACT	WT	501	502	0.000134912	212	213	0.000157461	829	830	0.000132715	NA	NA	NA	NA	NA	NA	NA	NA	NA	291	292	6.20706e-05	162	163	7.54651e-05	66	67	8.38446e-05	2153	2154	0.00115918	77	78	3.88823e-05	49	50	6.91928e-05	13	14	3.96599e-06	668	669	0.000144564	NA	NA	NA	NA	NA
IKYSYEYL	ATTAAGTATAGTTACGAGTACCTC	WT	369	370	9.94375e-05	143	144	0.000106453	607	608	9.72174e-05	NA	NA	NA	NA	NA	NA	NA	NA	NA	309	310	6.58968e-05	139	140	6.48166e-05	48	49	6.13192e-05	68	69	3.71326e-05	42	43	2.14351e-05	1	2	2.76771e-06	22	23	6.51555e-06	1083	1084	0.000234241	NA	NA	NA	NA	NA
ILAVFYTV	ATTCTAGCGGTATTCTACACTGTC	WT	950	951	0.000255581	345	346	0.000255782	1553	1554	0.00024848	NA	NA	NA	NA	NA	NA	NA	NA	NA	531	532	0.000113087	283	284	0.000131485	118	119	0.000148918	296	297	0.000159832	93	94	4.68582e-05	36	37	5.12026e-05	3688	3689	0.00104504	393	394	8.51393e-05	NA	NA	NA	NA	NA
ILCLYIHM	ATTCTATGCCTTTATATCCATATG	WT	888	889	0.000238919	348	349	0.000258	1383	1384	0.000221298	NA	NA	NA	NA	NA	NA	NA	NA	NA	570	571	0.000121378	278	279	0.00012917	83	84	0.000105119	266	267	0.000143687	6	7	3.48944e-06	90	91	0.000125931	3607	3608	0.00102209	1577	1578	0.000340989	NA	NA	NA	NA	NA
ILFAQLGL	ATCCTTTTCGCACAGCTTGGCCTA	WT	4	5	1.34375e-06	5	6	4.43553e-06	17	18	2.87815e-06	NA	NA	NA	NA	NA	NA	NA	NA	NA	6	7	1.48799e-06	2	3	1.38893e-06	1	2	2.50283e-06	NA	1	5.38154e-07	NA	1	4.98492e-07	NA	1	1.38386e-06	NA	1	2.83285e-07	NA	1	2.1609e-07	NA	NA	NA	NA	NA
ILFAVALM	ATACTGTTCGCTGTTGCTCTGATG	WT	1276	1277	0.000343194	537	538	0.00039772	2377	2378	0.000380235	NA	NA	NA	NA	NA	NA	NA	NA	NA	763	764	0.000162404	313	314	0.000145374	117	118	0.000147667	704	705	0.000379399	3052	3053	0.00152189	56	57	7.88797e-05	8635	8636	0.00244645	6234	6235	0.00134732	NA	NA	NA	NA	NA
ILFFFMLL	ATTTTGTTCTTCTTTATGCTACTG	WT	823	824	0.00022145	276	277	0.000204774	1029	1030	0.000164694	NA	NA	NA	NA	NA	NA	NA	NA	NA	451	452	9.60818e-05	203	204	9.44471e-05	67	68	8.50961e-05	1159	1160	0.000624259	157	158	7.87617e-05	35	36	4.98188e-05	851	852	0.000241359	3159	3160	0.000682843	NA	NA	NA	NA	NA
ILFKVALM	ATTCTCTTTAAGGTAGCTCTCATG	WT	766	767	0.000206131	323	324	0.000239519	1194	1195	0.000191077	NA	NA	NA	NA	NA	NA	NA	NA	NA	460	461	9.7995e-05	260	261	0.000120837	95	96	0.000120136	914	915	0.000492411	79	80	3.98793e-05	127	128	0.000177133	1689	1690	0.000478752	127	128	2.76595e-05	NA	NA	NA	NA	NA
ILFLASPL	ATATTGTTCCTCGCCTCACCACTC	WT	259	260	6.9875e-05	93	94	6.949e-05	427	428	6.8436e-05	NA	NA	NA	NA	NA	NA	NA	NA	NA	173	174	3.69872e-05	88	89	4.12049e-05	26	27	3.37881e-05	10	11	5.9197e-06	15	16	7.97587e-06	3	4	5.53542e-06	76	77	2.18129e-05	550	551	0.000119065	NA	NA	NA	NA	NA
ILFSTPTI	ATCCTCTTTAGTACTCCGACGATC	WT	634	635	0.000170656	236	237	0.000175204	930	931	0.000148864	NA	NA	NA	NA	NA	NA	NA	NA	NA	403	404	8.58784e-05	183	184	8.51876e-05	53	54	6.75763e-05	107	108	5.81207e-05	1271	1272	0.000634081	7	8	1.10708e-05	1906	1907	0.000540224	237	238	5.14293e-05	NA	NA	NA	NA	NA
ILFVAAGL	ATCTTATTTGTGGCTGCGGGCTTA	WT	1237	1238	0.000332712	459	460	0.000340058	2241	2242	0.000358489	NA	NA	NA	NA	NA	NA	NA	NA	NA	853	854	0.000181535	337	338	0.000156486	128	129	0.000161432	79	80	4.30523e-05	164	165	8.22511e-05	35	36	4.98188e-05	2339	2340	0.000662887	2452	2453	0.000530068	NA	NA	NA	NA	NA
ILFYHLAA	ATTCTATTCTATCACCTAGCTGCA	WT	617	618	0.000166087	267	268	0.000198121	1111	1112	0.000177806	NA	NA	NA	NA	NA	NA	NA	NA	NA	424	425	9.03424e-05	211	212	9.81509e-05	67	68	8.50961e-05	128	129	6.94219e-05	78	79	3.93808e-05	487	488	0.000675321	577	578	0.000163739	5368	5369	0.00116018	NA	NA	NA	NA	NA
ILHEYDLL	ATCCTGCATGAATATGACTTACTT	WT	410	411	0.000110456	167	168	0.000124195	843	844	0.000134953	NA	NA	NA	NA	NA	NA	NA	NA	NA	312	313	6.65345e-05	136	137	6.34277e-05	49	50	6.25706e-05	36	37	1.99117e-05	38	39	1.94412e-05	1	2	2.76771e-06	35	36	1.01983e-05	233	234	5.05649e-05	NA	NA	NA	NA	NA
ILHVKSNL	ATACTCCATGTGAAATCCAATTTA	WT	227	228	6.1275e-05	86	87	6.43152e-05	460	461	7.37126e-05	NA	NA	NA	NA	NA	NA	NA	NA	NA	141	142	3.0185e-05	71	72	3.33343e-05	21	22	2.75311e-05	2	3	1.61446e-06	1	2	9.96983e-07	2	3	4.15157e-06	23	24	6.79884e-06	7	8	1.72872e-06	NA	NA	NA	NA	NA
ILKFAQYL	ATTCTAAAGTTTGCTCAGTATCTT	WT	1643	1644	0.000441825	527	528	0.000390327	2551	2552	0.000408057	NA	NA	NA	NA	NA	NA	NA	NA	NA	923	924	0.000196415	513	514	0.00023797	177	178	0.000222751	648	649	0.000349262	1382	1383	0.000689414	29	30	4.15157e-05	1494	1495	0.000423511	1043	1044	0.000225597	NA	NA	NA	NA	NA
ILLAAFGL	ATTCTGCTCGCCGCATTTGGTCTA	WT	703	704	0.0001892	210	211	0.000155983	1017	1018	0.000162775	NA	NA	NA	NA	NA	NA	NA	NA	NA	425	426	9.0555e-05	185	186	8.61135e-05	79	80	0.000100113	54	55	2.95985e-05	320	321	0.000160016	NA	1	1.38386e-06	61	62	1.75637e-05	113	114	2.46342e-05	NA	NA	NA	NA	NA
ILLFLSFL	ATCTTACTTTTCCTGTCCTTTCTT	WT	5008	5009	0.00134617	1569	1570	0.00116063	6897	6898	0.00110297	NA	NA	NA	NA	NA	NA	NA	NA	NA	2864	2865	0.000609014	1453	1454	0.000673167	483	484	0.000605684	1885	1886	0.00101496	801	802	0.00039979	334	335	0.000463591	1390	1391	0.000394049	3014	3015	0.00065151	NA	NA	NA	NA	NA
ILLHIPRL	ATTTTGCTGCACATCCCACGGCTC	WT	265	266	7.14875e-05	111	112	8.27966e-05	442	443	7.08344e-05	NA	NA	NA	NA	NA	NA	NA	NA	NA	170	171	3.63495e-05	66	67	3.10194e-05	24	25	3.12853e-05	65	66	3.55182e-05	2046	2047	0.00102041	NA	1	1.38386e-06	1	2	5.6657e-07	36	37	7.99531e-06	NA	NA	NA	NA	NA
ILLLVHNL	ATTCTTCTCTTGGTCCACAACCTT	WT	797	798	0.000214462	275	276	0.000204035	1370	1371	0.000219219	NA	NA	NA	NA	NA	NA	NA	NA	NA	483	484	0.000102884	261	262	0.0001213	76	77	9.63588e-05	884	885	0.000476267	291	292	0.00014556	42	43	5.95058e-05	129	130	3.6827e-05	5729	5730	0.00123819	NA	NA	NA	NA	NA
ILLNYAVL	ATTCTTCTTAATTACGCCGTTCTG	WT	972	973	0.000261494	336	337	0.000249129	1494	1495	0.000239046	NA	NA	NA	NA	NA	NA	NA	NA	NA	576	577	0.000122653	278	279	0.00012917	94	95	0.000118884	268	269	0.000144764	970	971	0.000484035	820	821	0.00113615	1040	1041	0.0002949	1190	1191	0.000257363	NA	NA	NA	NA	NA
ILLQFPFL	ATACTCCTCCAGTTTCCTTTCCTG	WT	1662	1663	0.000446931	545	546	0.000403634	2474	2475	0.000395745	NA	NA	NA	NA	NA	NA	NA	NA	NA	989	990	0.000210445	451	452	0.000209265	169	170	0.00021274	1155	1156	0.000622106	336	337	0.000167992	178	179	0.00024771	968	969	0.000274503	836	837	0.000180867	NA	NA	NA	NA	NA
ILLSIPQL	ATTCTCCTCTCTATCCCGCAGCTT	WT	725	726	0.000195112	270	271	0.000200338	1220	1221	0.000195234	NA	NA	NA	NA	NA	NA	NA	NA	NA	380	381	8.09893e-05	192	193	8.93544e-05	76	77	9.63588e-05	346	347	0.00018674	90	91	4.53627e-05	9	10	1.38386e-05	142	143	4.05097e-05	74	75	1.62067e-05	NA	NA	NA	NA	NA
ILLSVLNL	ATCTTACTTTCCGTCCTCAACCTC	WT	770	771	0.000207206	247	248	0.000183335	1345	1346	0.000215222	NA	NA	NA	NA	NA	NA	NA	NA	NA	459	460	9.77824e-05	219	220	0.000101855	104	105	0.000131398	745	746	0.000401463	210	211	0.000105182	5	6	8.30313e-06	355	356	0.000100849	3466	3467	0.000749182	NA	NA	NA	NA	NA
ILMCFVRI	ATCCTCATGTGTTTTGTTAGGATA	WT	1715	1716	0.000461175	630	631	0.00046647	3038	3039	0.000485927	NA	NA	NA	NA	NA	NA	NA	NA	NA	1116	1117	0.000237441	492	493	0.000228247	195	196	0.000245277	1040	1041	0.000560219	82	83	4.13748e-05	60	61	8.44152e-05	524	525	0.000148725	781	782	0.000168982	NA	NA	NA	NA	NA
ILMIKPRL	ATCCTCATGATCAAACCTAGGCTT	WT	399	400	0.0001075	78	79	5.84012e-05	584	585	9.35398e-05	NA	NA	NA	NA	NA	NA	NA	NA	NA	252	253	5.37803e-05	101	102	4.72236e-05	50	51	6.3822e-05	31	32	1.72209e-05	NA	1	4.98492e-07	199	200	0.000276771	22	23	6.51555e-06	611	612	0.000132247	NA	NA	NA	NA	NA
ILMLTSSL	ATACTCATGCTCACGTCGAGTTTG	WT	203	204	5.4825e-05	99	100	7.39256e-05	486	487	7.78699e-05	NA	NA	NA	NA	NA	NA	NA	NA	NA	164	165	3.50741e-05	67	68	3.14824e-05	29	30	3.75424e-05	84	85	4.57431e-05	4	5	2.49246e-06	3	4	5.53542e-06	35	36	1.01983e-05	3	4	8.64358e-07	NA	NA	NA	NA	NA
ILMTHSML	ATTCTGATGACGCATAGCATGTTA	WT	251	252	6.7725e-05	114	115	8.50144e-05	539	540	8.63444e-05	NA	NA	NA	NA	NA	NA	NA	NA	NA	170	171	3.63495e-05	73	74	3.42602e-05	27	28	3.50396e-05	66	67	3.60563e-05	14	15	7.47737e-06	1	2	2.76771e-06	NA	1	2.83285e-07	77	78	1.6855e-05	NA	NA	NA	NA	NA
ILMTLKML	ATACTTATGACACTTAAAATGCTA	WT	375	376	0.00010105	156	157	0.000116063	795	796	0.000127278	NA	NA	NA	NA	NA	NA	NA	NA	NA	285	286	6.07951e-05	108	109	5.04644e-05	46	47	5.88164e-05	76	77	4.14379e-05	2	3	1.49547e-06	78	79	0.000109325	77	78	2.20962e-05	787	788	0.000170279	NA	NA	NA	NA	NA
ILNFQRAL	ATATTGAATTTCCAAAGAGCGTTG	WT	132	133	3.57437e-05	54	55	4.06591e-05	128	129	2.06267e-05	NA	NA	NA	NA	NA	NA	NA	NA	NA	75	76	1.61553e-05	35	36	1.66671e-05	16	17	2.1274e-05	1	2	1.07631e-06	10	11	5.48341e-06	NA	1	1.38386e-06	NA	1	2.83285e-07	NA	1	2.1609e-07	NA	NA	NA	NA	NA
ILPILGSL	ATCTTGCCCATTCTCGGATCTCTC	WT	1724	1725	0.000463594	640	641	0.000473863	3033	3034	0.000485128	NA	NA	NA	NA	NA	NA	NA	NA	NA	983	984	0.000209169	502	503	0.000232877	194	195	0.000244025	412	413	0.000222258	2865	2866	0.00142868	1362	1363	0.00188619	470	471	0.000133427	3548	3549	0.000766902	NA	NA	NA	NA	NA
ILPPFELL	ATTCTACCGCCATTTGAGTTACTA	WT	483	484	0.000130075	159	160	0.000118281	693	694	0.000110969	NA	NA	NA	NA	NA	NA	NA	NA	NA	288	289	6.14328e-05	127	128	5.92609e-05	40	41	5.13079e-05	144	145	7.80324e-05	8	9	4.48642e-06	10	11	1.52224e-05	265	266	7.53538e-05	289	290	6.2666e-05	NA	NA	NA	NA	NA
ILQMFGKM	ATACTACAGATGTTTGGCAAGATG	WT	1076	1077	0.000289444	378	379	0.000280178	1954	1955	0.000312599	NA	NA	NA	NA	NA	NA	NA	NA	NA	724	725	0.000154114	312	313	0.000144911	137	138	0.000172695	184	185	9.95586e-05	178	179	8.923e-05	1064	1065	0.00147381	135	136	3.85267e-05	716	717	0.000154936	NA	NA	NA	NA	NA
ILQTFLYL	ATACTCCAAACCTTCCTGTACCTC	WT	154	155	4.16562e-05	52	53	3.91805e-05	232	233	3.7256e-05	NA	NA	NA	NA	NA	NA	NA	NA	NA	106	107	2.2745e-05	45	46	2.12969e-05	21	22	2.75311e-05	53	54	2.90603e-05	16	17	8.47436e-06	221	222	0.000307216	64	65	1.84135e-05	8	9	1.94481e-06	NA	NA	NA	NA	NA
ILREFVSI	ATTCTTAGGGAGTTCGTAAGTATC	WT	6084	6085	0.00163534	2167	2168	0.00160271	9927	9928	0.00158746	NA	NA	NA	NA	NA	NA	NA	NA	NA	3846	3847	0.000817758	1664	1665	0.000770855	648	649	0.000812167	3180	3181	0.00171187	3182	3183	0.0015867	380	381	0.000527249	2652	2653	0.000751555	8403	8404	0.00181602	NA	NA	NA	NA	NA
ILRHFHLL	ATTCTTAGACATTTTCACCTACTC	WT	643	644	0.000173075	183	184	0.000136023	1011	1012	0.000161816	NA	NA	NA	NA	NA	NA	NA	NA	NA	360	361	7.67379e-05	186	187	8.65765e-05	72	73	9.13531e-05	100	101	5.43536e-05	68	69	3.43959e-05	5	6	8.30313e-06	78	79	2.23795e-05	78	79	1.70711e-05	NA	NA	NA	NA	NA
ILRRFLVL	ATCTTACGCCGCTTTCTCGTGTTA	WT	496	497	0.000133569	163	164	0.000121238	739	740	0.000118324	NA	NA	NA	NA	NA	NA	NA	NA	NA	303	304	6.46214e-05	120	121	5.60201e-05	54	55	6.88277e-05	16	17	9.14862e-06	402	403	0.000200892	1	2	2.76771e-06	213	214	6.0623e-05	67	68	1.46941e-05	NA	NA	NA	NA	NA
ILRYFGKL	ATTCTCAGGTATTTTGGTAAGCTG	WT	2098	2099	0.000564106	757	758	0.000560356	3240	3241	0.000518227	NA	NA	NA	NA	NA	NA	NA	NA	NA	1115	1116	0.000237229	568	569	0.000263433	208	209	0.000261545	376	377	0.000202884	467	468	0.000233294	699	700	0.000968699	1140	1141	0.000323228	2483	2484	0.000536766	NA	NA	NA	NA	NA
ILSCFCPM	ATACTCAGTTGCTTCTGTCCCATG	WT	515	516	0.000138675	194	195	0.000144155	900	901	0.000144067	NA	NA	NA	NA	NA	NA	NA	NA	NA	287	288	6.12203e-05	147	148	6.85205e-05	55	56	7.00791e-05	42	43	2.31406e-05	8	9	4.48642e-06	1	2	2.76771e-06	68	69	1.95467e-05	128	129	2.78755e-05	NA	NA	NA	NA	NA
ILSIFYTI	ATACTCTCGATTTTCTACACGATT	WT	517	518	0.000139212	214	215	0.00015894	752	753	0.000120403	NA	NA	NA	NA	NA	NA	NA	NA	NA	351	352	7.48248e-05	176	177	8.19468e-05	49	50	6.25706e-05	383	384	0.000206651	25	26	1.29608e-05	8	9	1.24547e-05	569	570	0.000161472	745	746	0.000161203	NA	NA	NA	NA	NA
ILTVFYTI	ATCTTGACTGTATTTTACACCATT	WT	1230	1231	0.000330831	393	394	0.000291267	2024	2025	0.000323792	NA	NA	NA	NA	NA	NA	NA	NA	NA	749	750	0.000159428	322	323	0.000149541	134	135	0.000168941	997	998	0.000537078	101	102	5.08461e-05	495	496	0.000686392	322	323	9.1501e-05	711	712	0.000153856	NA	NA	NA	NA	NA
ILVLFSSL	ATATTAGTTCTGTTTTCGTCTCTT	WT	1757	1758	0.000472462	594	595	0.000439857	2511	2512	0.000401662	NA	NA	NA	NA	NA	NA	NA	NA	NA	1011	1012	0.000215121	521	522	0.000241673	171	172	0.000215243	288	289	0.000155527	334	335	0.000166995	87	88	0.000121779	6242	6243	0.00176855	2090	2091	0.000451843	NA	NA	NA	NA	NA
ILVLTYPL	ATACTTGTTTTGACATACCCGCTC	WT	406	407	0.000109381	143	144	0.000106453	712	713	0.000114007	NA	NA	NA	NA	NA	NA	NA	NA	NA	243	244	5.18672e-05	82	83	3.8427e-05	39	40	5.00565e-05	58	59	3.17511e-05	19	20	9.96983e-06	NA	1	1.38386e-06	430	431	0.000122096	942	943	0.000203772	NA	NA	NA	NA	NA
ILVSFGLF	ATCCTCGTATCCTTCGGGTTATTT	WT	4042	4043	0.00108656	1374	1375	0.00101648	6717	6718	0.00107419	NA	NA	NA	NA	NA	NA	NA	NA	NA	2503	2504	0.000532276	1248	1249	0.000578257	453	454	0.000568141	629	630	0.000339037	510	511	0.000254729	3122	3123	0.00432178	6776	6777	0.00191982	1718	1719	0.000371458	NA	NA	NA	NA	NA
ILVSIFAL	ATTCTCGTGTCTATATTTGCGCTG	WT	831	832	0.0002236	284	285	0.000210688	1472	1473	0.000235528	NA	NA	NA	NA	NA	NA	NA	NA	NA	505	506	0.000107561	220	221	0.000102318	82	83	0.000103867	707	708	0.000381013	1480	1481	0.000738266	1749	1750	0.00242175	685	686	0.000194333	1845	1846	0.000398901	NA	NA	NA	NA	NA
ILVSYIRV	ATTCTGGTATCGTACATTCGAGTT	WT	1667	1668	0.000448275	583	584	0.000431725	3126	3127	0.000499998	NA	NA	NA	NA	NA	NA	NA	NA	NA	1076	1077	0.000228938	485	486	0.000225006	183	184	0.00023026	298	299	0.000160908	661	662	0.000330001	335	336	0.000464975	73	74	2.09631e-05	200	201	4.3434e-05	NA	NA	NA	NA	NA
ILYAAPQL	ATACTATATGCGGCACCCCAATTG	WT	411	412	0.000110725	141	142	0.000104974	610	611	9.76971e-05	NA	NA	NA	NA	NA	NA	NA	NA	NA	215	216	4.59152e-05	99	100	4.62976e-05	47	48	6.00678e-05	8	9	4.84339e-06	232	233	0.000116149	11	12	1.66063e-05	450	451	0.000127761	119	120	2.59307e-05	NA	NA	NA	NA	NA
ILYAYQLS	ATCTTATATGCCTATCAGCTCAGC	WT	696	697	0.000187319	236	237	0.000175204	1156	1157	0.000185001	NA	NA	NA	NA	NA	NA	NA	NA	NA	406	407	8.65161e-05	177	178	8.24097e-05	54	55	6.88277e-05	129	130	6.99601e-05	228	229	0.000114155	2	3	4.15157e-06	6	7	1.98299e-06	102	103	2.22572e-05	NA	NA	NA	NA	NA
ILYDHTAL	ATTCTTTACGATCATACTGCATTA	WT	399	400	0.0001075	157	158	0.000116802	574	575	9.19408e-05	NA	NA	NA	NA	NA	NA	NA	NA	NA	271	272	5.78191e-05	130	131	6.06499e-05	46	47	5.88164e-05	7	8	4.30523e-06	2	3	1.49547e-06	14	15	2.07578e-05	406	407	0.000115297	76	77	1.66389e-05	NA	NA	NA	NA	NA
ILYDIHYI	ATACTATATGACATCCACTATATC	WT	1471	1472	0.0003956	554	555	0.000410287	2340	2341	0.000374319	NA	NA	NA	NA	NA	NA	NA	NA	NA	836	837	0.000177921	364	365	0.000168986	166	167	0.000208986	356	357	0.000192121	960	961	0.00047905	19	20	2.76771e-05	304	305	8.64019e-05	1885	1886	0.000407545	NA	NA	NA	NA	NA
ILYDREGL	ATTTTGTATGATCGAGAGGGATTA	WT	306	307	8.25062e-05	123	124	9.16677e-05	505	506	8.09079e-05	NA	NA	NA	NA	NA	NA	NA	NA	NA	177	178	3.78375e-05	100	101	4.67606e-05	36	37	4.63023e-05	2173	2174	0.00116995	34	35	1.74472e-05	1	2	2.76771e-06	81	82	2.32294e-05	7	8	1.72872e-06	NA	NA	NA	NA	NA
ILYFFFLL	ATTCTGTACTTCTTCTTTCTTCTG	WT	2874	2875	0.000772656	921	922	0.000681594	3796	3797	0.000607129	NA	NA	NA	NA	NA	NA	NA	NA	NA	1597	1598	0.000339687	856	857	0.00039677	288	289	0.000361658	746	747	0.000402001	1377	1378	0.000686921	253	254	0.000351499	2029	2030	0.000575068	4785	4786	0.0010342	NA	NA	NA	NA	NA
ILYFMLGL	ATCCTATACTTCATGCTTGGCCTA	WT	135	136	3.655e-05	40	41	3.03095e-05	231	232	3.70961e-05	NA	NA	NA	NA	NA	NA	NA	NA	NA	110	111	2.35953e-05	43	44	2.03709e-05	21	22	2.75311e-05	73	74	3.98234e-05	NA	1	4.98492e-07	1	2	2.76771e-06	NA	1	2.83285e-07	2	3	6.48269e-07	NA	NA	NA	NA	NA
ILYGMLLL	ATCTTATACGGGATGCTGTTGCTA	WT	606	607	0.000163131	251	252	0.000186292	1003	1004	0.000160537	NA	NA	NA	NA	NA	NA	NA	NA	NA	343	344	7.31242e-05	160	161	7.45391e-05	57	58	7.25819e-05	NA	1	5.38154e-07	17	18	8.97285e-06	16	17	2.35255e-05	15	16	4.53256e-06	285	286	6.18016e-05	NA	NA	NA	NA	NA
ILYIVSYF	ATCCTGTACATCGTGTCCTACTTC	WT	1205	1206	0.000324112	450	451	0.000333404	2123	2124	0.000339621	NA	NA	NA	NA	NA	NA	NA	NA	NA	740	741	0.000157515	290	291	0.000134726	151	152	0.000190215	1291	1292	0.000695295	9	10	4.98492e-06	122	123	0.000170214	407	408	0.00011558	448	449	9.70242e-05	NA	NA	NA	NA	NA
ILYLMAVV	ATACTGTATCTGATGGCAGTGGTC	WT	202	203	5.45562e-05	68	69	5.10086e-05	377	378	6.04411e-05	NA	NA	NA	NA	NA	NA	NA	NA	NA	128	129	2.74216e-05	40	41	1.8982e-05	27	28	3.50396e-05	12	13	6.99601e-06	3	4	1.99397e-06	2	3	4.15157e-06	NA	1	2.83285e-07	50	51	1.10206e-05	NA	NA	NA	NA	NA
ILYNNLGL	ATACTGTATAACAACTTGGGGCTC	WT	502	503	0.000135181	181	182	0.000134545	860	861	0.000137671	NA	NA	NA	NA	NA	NA	NA	NA	NA	318	319	6.781e-05	126	127	5.8798e-05	65	66	8.25932e-05	31	32	1.72209e-05	284	285	0.00014207	143	144	0.000199275	132	133	3.76769e-05	110	111	2.39859e-05	NA	NA	NA	NA	NA
ILYPTLPV	ATTCTGTACCCTACACTGCCCGTC	WT	653	654	0.000175762	269	270	0.000199599	1390	1391	0.000222417	NA	NA	NA	NA	NA	NA	NA	NA	NA	432	433	9.2043e-05	204	205	9.49101e-05	107	108	0.000135153	39	40	2.15262e-05	90	91	4.53627e-05	14	15	2.07578e-05	1787	1788	0.000506513	742	743	0.000160555	NA	NA	NA	NA	NA
ILYPYELF	ATCTTATACCCGTATGAGCTGTTT	WT	484	485	0.000130344	167	168	0.000124195	798	799	0.000127758	NA	NA	NA	NA	NA	NA	NA	NA	NA	266	267	5.67563e-05	134	135	6.25018e-05	45	46	5.7565e-05	70	71	3.8209e-05	12	13	6.48039e-06	1	2	2.76771e-06	125	126	3.56939e-05	1735	1736	0.000375131	NA	NA	NA	NA	NA
ILYSHYTT	ATACTGTATTCCCATTACACCACG	WT	231	232	6.235e-05	91	92	6.80115e-05	376	377	6.02812e-05	NA	NA	NA	NA	NA	NA	NA	NA	NA	162	163	3.4649e-05	68	69	3.19453e-05	14	15	1.87712e-05	178	179	9.63296e-05	81	82	4.08763e-05	12	13	1.79901e-05	NA	1	2.83285e-07	7	8	1.72872e-06	NA	NA	NA	NA	NA
ILYTVLSI	ATCTTGTACACAGTCCTTTCAATA	WT	760	761	0.000204519	307	308	0.000227691	1304	1305	0.000208666	NA	NA	NA	NA	NA	NA	NA	NA	NA	496	497	0.000105647	253	254	0.000117596	102	103	0.000128895	144	145	7.80324e-05	1	2	9.96983e-07	186	187	0.000258781	229	230	6.51555e-05	1618	1619	0.000349849	NA	NA	NA	NA	NA
ILYTYQLL	ATATTATATACCTATCAACTACTA	WT	255	256	6.88e-05	121	122	9.01892e-05	351	352	5.62838e-05	NA	NA	NA	NA	NA	NA	NA	NA	NA	126	127	2.69964e-05	59	60	2.77786e-05	22	23	2.87825e-05	8312	8313	0.00447368	22	23	1.14653e-05	4	5	6.91928e-06	9	10	2.83285e-06	1012	1013	0.000218899	NA	NA	NA	NA	NA
IMFLFVLA	ATCATGTTTCTGTTTGTTCTTGCT	WT	993	994	0.000267137	349	350	0.000258739	1635	1636	0.000261592	NA	NA	NA	NA	NA	NA	NA	NA	NA	602	603	0.00012818	307	308	0.000142597	96	97	0.000121387	1455	1456	0.000783553	127	128	6.38069e-05	87	88	0.000121779	31	32	9.06512e-06	2464	2465	0.000532661	NA	NA	NA	NA	NA
IMFRYAVD	ATTATGTTCCGTTACGCGGTCGAT	WT	263	264	7.095e-05	97	98	7.24471e-05	546	547	8.74637e-05	NA	NA	NA	NA	NA	NA	NA	NA	NA	204	205	4.35769e-05	89	90	4.16678e-05	38	39	4.88051e-05	49	50	2.69077e-05	11	12	5.9819e-06	395	396	0.000548007	45	46	1.30311e-05	157	158	3.41421e-05	NA	NA	NA	NA	NA
IMFSFRVP	ATAATGTTCAGTTTCAGAGTTCCA	WT	731	732	0.000196725	275	276	0.000204035	1222	1223	0.000195554	NA	NA	NA	NA	NA	NA	NA	NA	NA	446	447	9.5019e-05	226	227	0.000105096	78	79	9.88616e-05	46	47	2.52933e-05	36	37	1.84442e-05	6	7	9.68699e-06	245	246	6.96881e-05	341	342	7.39026e-05	NA	NA	NA	NA	NA
IMFSIIFL	ATAATGTTCTCGATCATCTTCTTA	WT	1436	1437	0.000386194	477	478	0.000353364	2068	2069	0.000330827	NA	NA	NA	NA	NA	NA	NA	NA	NA	779	780	0.000165805	339	340	0.000157412	136	137	0.000171444	324	325	0.0001749	13	14	6.97888e-06	201	202	0.000279539	202	203	5.75068e-05	3438	3439	0.000743132	NA	NA	NA	NA	NA
IMFSLNTV	ATAATGTTCAGTCTTAATACAGTT	WT	984	985	0.000264719	311	312	0.000230648	1487	1488	0.000237927	NA	NA	NA	NA	NA	NA	NA	NA	NA	596	597	0.000126905	269	270	0.000125004	94	95	0.000118884	123	124	6.67311e-05	1062	1063	0.000529897	35	36	4.98188e-05	9105	9106	0.00257959	665	666	0.000143916	NA	NA	NA	NA	NA
IMFVDPSL	ATTATGTTTGTGGACCCGTCCCTT	WT	1128	1129	0.000303419	352	353	0.000260957	2005	2006	0.000320754	NA	NA	NA	NA	NA	NA	NA	NA	NA	674	675	0.000143485	307	308	0.000142597	113	114	0.000142661	1700	1701	0.000915401	265	266	0.000132599	105	106	0.000146689	189	190	5.38241e-05	622	623	0.000134624	NA	NA	NA	NA	NA
IMHIYATV	ATAATGCATATCTACGCCACGGTG	WT	15	16	4.3e-06	15	16	1.18281e-05	31	32	5.11671e-06	NA	NA	NA	NA	NA	NA	NA	NA	NA	8	9	1.91313e-06	4	5	2.31488e-06	NA	1	1.25141e-06	NA	1	5.38154e-07	NA	1	4.98492e-07	NA	1	1.38386e-06	NA	1	2.83285e-07	2	3	6.48269e-07	NA	NA	NA	NA	NA
IMHLVPVL	ATAATGCACCTCGTACCAGTGCTA	WT	83	84	2.2575e-05	56	57	4.21376e-05	167	168	2.68627e-05	NA	NA	NA	NA	NA	NA	NA	NA	NA	52	53	1.12662e-05	24	25	1.15744e-05	4	5	6.25706e-06	231	232	0.000124852	11	12	5.9819e-06	1	2	2.76771e-06	NA	1	2.83285e-07	3	4	8.64358e-07	NA	NA	NA	NA	NA
IMIRSIFL	ATTATGATTCGCTCTATCTTTCTT	WT	1649	1650	0.000443437	621	622	0.000459817	2210	2211	0.000353532	NA	NA	NA	NA	NA	NA	NA	NA	NA	1023	1024	0.000217672	471	472	0.000218525	170	171	0.000213992	729	730	0.000392853	280	281	0.000140076	178	179	0.00024771	2632	2633	0.000745889	32771	32772	0.00708169	NA	NA	NA	NA	NA
IMITNFEL	ATAATGATTACCAATTTCGAGCTG	WT	426	427	0.000114756	129	130	9.61032e-05	656	657	0.000105052	NA	NA	NA	NA	NA	NA	NA	NA	NA	235	236	5.01666e-05	114	115	5.32422e-05	40	41	5.13079e-05	11	12	6.45785e-06	268	269	0.000134094	60	61	8.44152e-05	1	2	5.6657e-07	84	85	1.83676e-05	NA	NA	NA	NA	NA
IMLDYLDL	ATTATGCTGGATTACTTAGATCTG	WT	820	821	0.000220644	283	284	0.000209949	1199	1200	0.000191877	NA	NA	NA	NA	NA	NA	NA	NA	NA	458	459	9.75698e-05	220	221	0.000102318	87	88	0.000110124	56	57	3.06748e-05	1258	1259	0.000627601	186	187	0.000258781	201	202	5.72236e-05	361	362	7.82244e-05	NA	NA	NA	NA	NA
IMLFCLGL	ATAATGTTGTTCTGCTTAGGTCTC	WT	758	759	0.000203981	251	252	0.000186292	1326	1327	0.000212183	NA	NA	NA	NA	NA	NA	NA	NA	NA	438	439	9.33184e-05	200	201	9.30582e-05	78	79	9.88616e-05	55	56	3.01366e-05	21	22	1.09668e-05	7	8	1.10708e-05	842	843	0.000238809	1531	1532	0.000331049	NA	NA	NA	NA	NA
IMLLERTL	ATTATGCTTCTGGAACGTACACTA	WT	755	756	0.000203175	250	251	0.000185553	1229	1230	0.000196673	NA	NA	NA	NA	NA	NA	NA	NA	NA	436	437	9.28933e-05	194	195	9.02803e-05	81	82	0.000102616	291	292	0.000157141	521	522	0.000260213	34	35	4.84349e-05	104	105	2.97449e-05	61	62	1.33975e-05	NA	NA	NA	NA	NA
IMLSSASI	ATAATGCTGTCATCAGCTAGTATC	WT	690	691	0.000185706	284	285	0.000210688	1096	1097	0.000175407	NA	NA	NA	NA	NA	NA	NA	NA	NA	435	436	9.26807e-05	202	203	9.39841e-05	83	84	0.000105119	197	198	0.000106555	11	12	5.9819e-06	66	67	9.27183e-05	163	164	4.64587e-05	327	328	7.08774e-05	NA	NA	NA	NA	NA
IMLVLPSI	ATCATGTTGGTGCTTCCGAGCATA	WT	756	757	0.000203444	285	286	0.000211427	1475	1476	0.000236008	NA	NA	NA	NA	NA	NA	NA	NA	NA	651	652	0.000138596	257	258	0.000119448	83	84	0.000105119	603	604	0.000325045	61	62	3.09065e-05	476	477	0.000660099	857	858	0.000243058	21	22	4.75397e-06	NA	NA	NA	NA	NA
IMMVVAGF	ATTATGATGGTCGTCGCAGGGTTT	WT	710	711	0.000191081	251	252	0.000186292	1353	1354	0.000216501	NA	NA	NA	NA	NA	NA	NA	NA	NA	447	448	9.52315e-05	165	166	7.6854e-05	63	64	8.00904e-05	63	64	3.44419e-05	86	87	4.33688e-05	10	11	1.52224e-05	15	16	4.53256e-06	400	401	8.66519e-05	NA	NA	NA	NA	NA
IMNQYTEI	ATTATGAACCAATATACGGAGATC	WT	230	231	6.20812e-05	87	88	6.50545e-05	294	295	4.71696e-05	NA	NA	NA	NA	NA	NA	NA	NA	NA	113	114	2.4233e-05	53	54	2.50007e-05	18	19	2.37768e-05	1	2	1.07631e-06	788	789	0.00039331	1	2	2.76771e-06	9	10	2.83285e-06	54	55	1.18849e-05	NA	NA	NA	NA	NA
IMRWLWQL	ATCATGCGGTGGTTGTGGCAGCTA	WT	174	175	4.70312e-05	74	75	5.54442e-05	250	251	4.01342e-05	NA	NA	NA	NA	NA	NA	NA	NA	NA	82	83	1.76433e-05	49	50	2.31488e-05	19	20	2.50283e-05	9	10	5.38154e-06	NA	1	4.98492e-07	NA	1	1.38386e-06	NA	1	2.83285e-07	NA	1	2.1609e-07	NA	NA	NA	NA	NA
IMTFRPSM	ATTATGACATTTCGTCCGTCTATG	WT	564	565	0.000151844	216	217	0.000160418	988	989	0.000158138	NA	NA	NA	NA	NA	NA	NA	NA	NA	402	403	8.56659e-05	161	162	7.50021e-05	60	61	7.63362e-05	582	583	0.000313744	164	165	8.22511e-05	42	43	5.95058e-05	10	11	3.11613e-06	174	175	3.78157e-05	NA	NA	NA	NA	NA
IMYNLIIV	ATCATGTATAATCTTATTATAGTG	WT	504	505	0.000135719	205	206	0.000152287	736	737	0.000117844	NA	NA	NA	NA	NA	NA	NA	NA	NA	346	347	7.37619e-05	169	170	7.87059e-05	59	60	7.50848e-05	61	62	3.33656e-05	146	147	7.32783e-05	125	126	0.000174366	640	641	0.000181586	130	131	2.83077e-05	NA	NA	NA	NA	NA
IMYYLSRI	ATCATGTATTACCTATCCCGGATA	WT	571	572	0.000153725	199	200	0.000147851	976	977	0.000156219	NA	NA	NA	NA	NA	NA	NA	NA	NA	332	333	7.07859e-05	147	148	6.85205e-05	55	56	7.00791e-05	151	152	8.17995e-05	91	92	4.58612e-05	671	672	0.000929951	183	184	5.21244e-05	287	288	6.22338e-05	NA	NA	NA	NA	NA
INALVHSL	ATCAACGCCTTAGTTCATAGTCTC	WT	247	248	6.665e-05	98	99	7.31863e-05	394	395	6.31594e-05	NA	NA	NA	NA	NA	NA	NA	NA	NA	158	159	3.37987e-05	92	93	4.30568e-05	24	25	3.12853e-05	148	149	8.0185e-05	3	4	1.99397e-06	NA	1	1.38386e-06	3	4	1.13314e-06	30	31	6.69877e-06	NA	NA	NA	NA	NA
INANYIDI	ATAAATGCCAATTATATCGACATT	WT	346	347	9.32562e-05	118	119	8.79714e-05	649	650	0.000103933	NA	NA	NA	NA	NA	NA	NA	NA	NA	230	231	4.91038e-05	93	94	4.35197e-05	45	46	5.7565e-05	46	47	2.52933e-05	82	83	4.13748e-05	61	62	8.5799e-05	18	19	5.38241e-06	52	53	1.14527e-05	NA	NA	NA	NA	NA
INEAYAAL	ATCAATGAGGCGTACGCAGCCCTG	WT	87	88	2.365e-05	20	21	1.55244e-05	52	53	8.47455e-06	NA	NA	NA	NA	NA	NA	NA	NA	NA	20	21	4.46398e-06	8	9	4.16678e-06	6	7	8.75989e-06	21	22	1.18394e-05	NA	1	4.98492e-07	NA	1	1.38386e-06	4	5	1.41642e-06	1	2	4.32179e-07	NA	NA	NA	NA	NA
INFDDAFL	ATTAACTTCGACGACGCGTTCCTG	WT	210	211	5.67062e-05	66	67	4.95301e-05	295	296	4.73295e-05	NA	NA	NA	NA	NA	NA	NA	NA	NA	147	148	3.14604e-05	63	64	2.96305e-05	19	20	2.50283e-05	51	52	2.7984e-05	19	20	9.96983e-06	NA	1	1.38386e-06	1	2	5.6657e-07	30	31	6.69877e-06	NA	NA	NA	NA	NA
INFNCRKL	ATCAACTTTAACTGCCGGAAGCTC	WT	269	270	7.25625e-05	75	76	5.61834e-05	477	478	7.64308e-05	NA	NA	NA	NA	NA	NA	NA	NA	NA	160	161	3.42238e-05	80	81	3.75011e-05	20	21	2.62797e-05	259	260	0.00013992	148	149	7.42752e-05	NA	1	1.38386e-06	805	806	0.000228328	11	12	2.59307e-06	NA	NA	NA	NA	NA
INFNTRFV	ATTAACTTCAACACACGTTTCGTA	WT	820	821	0.000220644	375	376	0.00027796	1457	1458	0.00023313	NA	NA	NA	NA	NA	NA	NA	NA	NA	638	639	0.000135832	284	285	0.000131948	110	111	0.000138907	173	174	9.36389e-05	2062	2063	0.00102839	23	24	3.32125e-05	241	242	6.85549e-05	2030	2031	0.000438878	NA	NA	NA	NA	NA
INFTWINS	ATTAATTTTACTTGGATAAACTCG	WT	211	212	5.6975e-05	98	99	7.31863e-05	340	341	5.45249e-05	NA	NA	NA	NA	NA	NA	NA	NA	NA	136	137	2.91221e-05	70	71	3.28713e-05	32	33	4.12966e-05	128	129	6.94219e-05	10	11	5.48341e-06	7	8	1.10708e-05	18	19	5.38241e-06	199	200	4.32179e-05	NA	NA	NA	NA	NA
INFVRNTV	ATTAACTTTGTCCGAAATACTGTT	WT	318	319	8.57312e-05	95	96	7.09685e-05	575	576	9.21007e-05	NA	NA	NA	NA	NA	NA	NA	NA	NA	215	216	4.59152e-05	113	114	5.27793e-05	33	34	4.2548e-05	166	167	8.98718e-05	1	2	9.96983e-07	1	2	2.76771e-06	1	2	5.6657e-07	78	79	1.70711e-05	NA	NA	NA	NA	NA
INHFSCDL	ATCAATCATTTTAGTTGTGACCTT	WT	663	664	0.00017845	265	266	0.000196642	1120	1121	0.000179245	NA	NA	NA	NA	NA	NA	NA	NA	NA	468	469	9.96955e-05	216	217	0.000100466	79	80	0.000100113	5491	5492	0.00295554	42	43	2.14351e-05	77	78	0.000107941	2220	2221	0.000629176	174	175	3.78157e-05	NA	NA	NA	NA	NA
INIFSSSF	ATTAATATATTTAGCTCGTCCTTT	WT	373	374	0.000100512	142	143	0.000105714	685	686	0.000109689	NA	NA	NA	NA	NA	NA	NA	NA	NA	243	244	5.18672e-05	137	138	6.38907e-05	42	43	5.38107e-05	68	69	3.71326e-05	35	36	1.79457e-05	9	10	1.38386e-05	90	91	2.57789e-05	6	7	1.51263e-06	NA	NA	NA	NA	NA
INIMLLSI	ATCAACATAATGCTACTTTCTATA	WT	1874	1875	0.000503906	760	761	0.000562574	3220	3221	0.000515029	NA	NA	NA	NA	NA	NA	NA	NA	NA	1311	1312	0.000278892	537	538	0.000249081	209	210	0.000262797	448	449	0.000241631	406	407	0.000202886	422	423	0.000585371	3820	3821	0.00108243	3935	3936	0.000850528	NA	NA	NA	NA	NA
INIVPFGI	ATCAACATAGTACCATTTGGTATT	WT	265	266	7.14875e-05	62	63	4.65731e-05	416	417	6.66771e-05	NA	NA	NA	NA	NA	NA	NA	NA	NA	200	201	4.27266e-05	81	82	3.7964e-05	24	25	3.12853e-05	4	5	2.69077e-06	4	5	2.49246e-06	1	2	2.76771e-06	13	14	3.96599e-06	28	29	6.2666e-06	NA	NA	NA	NA	NA
INLESQYL	ATAAATTTGGAATCGCAGTACTTG	WT	964	965	0.000259344	422	423	0.000312705	1961	1962	0.000313718	NA	NA	NA	NA	NA	NA	NA	NA	NA	718	719	0.000152838	265	266	0.000123152	95	96	0.000120136	229	230	0.000123775	164	165	8.22511e-05	2221	2222	0.00307493	1682	1683	0.000476769	341	342	7.39026e-05	NA	NA	NA	NA	NA
INLHELLL	ATAAATTTACATGAACTACTGCTA	WT	606	607	0.000163131	233	234	0.000172986	968	969	0.00015494	NA	NA	NA	NA	NA	NA	NA	NA	NA	400	401	8.52407e-05	175	176	8.14838e-05	79	80	0.000100113	129	130	6.99601e-05	885	886	0.000441664	79	80	0.000110708	1044	1045	0.000296033	153	154	3.32778e-05	NA	NA	NA	NA	NA
INLNLGIL	ATCAACTTAAATCTTGGGATACTG	WT	450	451	0.000121206	183	184	0.000136023	762	763	0.000122001	NA	NA	NA	NA	NA	NA	NA	NA	NA	261	262	5.56934e-05	126	127	5.8798e-05	43	44	5.50622e-05	78	79	4.25142e-05	73	74	3.68884e-05	2	3	4.15157e-06	213	214	6.0623e-05	959	960	0.000207446	NA	NA	NA	NA	NA
INLSFNVF	ATAAATCTGAGCTTCAATGTTTTC	WT	1228	1229	0.000330294	431	432	0.000319358	1849	1850	0.00029581	NA	NA	NA	NA	NA	NA	NA	NA	NA	780	781	0.000166017	341	342	0.000158338	134	135	0.000168941	261	262	0.000140996	1851	1852	0.000923206	220	221	0.000305832	188	189	5.35408e-05	2680	2681	0.000579336	NA	NA	NA	NA	NA
INLSSNRL	ATCAACCTTAGTAGTAACCGGTTA	WT	259	260	6.9875e-05	74	75	5.54442e-05	460	461	7.37126e-05	NA	NA	NA	NA	NA	NA	NA	NA	NA	140	141	2.99724e-05	72	73	3.37973e-05	28	29	3.6291e-05	838	839	0.000451511	68	69	3.43959e-05	8	9	1.24547e-05	405	406	0.000115014	20	21	4.53788e-06	NA	NA	NA	NA	NA
INNIFLYL	ATTAATAATATATTTCTCTACCTA	WT	847	848	0.0002279	325	326	0.000240997	1388	1389	0.000222097	NA	NA	NA	NA	NA	NA	NA	NA	NA	670	671	0.000142635	251	252	0.00011667	97	98	0.000122638	101	102	5.48917e-05	370	371	0.00018494	20	21	2.9061e-05	371	372	0.000105382	146	147	3.17652e-05	NA	NA	NA	NA	NA
INNIIFSL	ATAAACAATATCATCTTCTCTCTC	WT	1253	1254	0.000337012	480	481	0.000355582	1846	1847	0.00029533	NA	NA	NA	NA	NA	NA	NA	NA	NA	724	725	0.000154114	326	327	0.000151393	125	126	0.000157678	79	80	4.30523e-05	361	362	0.000180454	7	8	1.10708e-05	142	143	4.05097e-05	819	820	0.000177193	NA	NA	NA	NA	NA
INPICYAL	ATTAATCCGATTTGCTACGCTTTA	WT	NA	1	2.6875e-07	NA	1	7.39256e-07	NA	1	1.59897e-07	NA	NA	NA	NA	NA	NA	NA	NA	NA	NA	1	2.1257e-07	NA	1	4.62976e-07	NA	1	1.25141e-06	NA	1	5.38154e-07	NA	1	4.98492e-07	NA	1	1.38386e-06	NA	1	2.83285e-07	NA	1	2.1609e-07	NA	NA	NA	NA	NA
INPLLYRL	ATCAATCCTTTATTGTATCGGTTA	WT	813	814	0.000218762	297	298	0.000220298	1258	1259	0.00020131	NA	NA	NA	NA	NA	NA	NA	NA	NA	541	542	0.000115213	213	214	9.90769e-05	93	94	0.000117633	449	450	0.000242169	124	125	6.23114e-05	127	128	0.000177133	871	872	0.000247024	1247	1248	0.00026968	NA	NA	NA	NA	NA
INPRHTLI	ATAAATCCTAGACACACCTTAATA	WT	476	477	0.000128194	215	216	0.000159679	865	866	0.000138471	NA	NA	NA	NA	NA	NA	NA	NA	NA	347	348	7.39745e-05	149	150	6.94464e-05	72	73	9.13531e-05	77	78	4.1976e-05	49	50	2.49246e-05	NA	1	1.38386e-06	12	13	3.6827e-06	220	221	4.77558e-05	NA	NA	NA	NA	NA
INQSFNAV	ATTAACCAATCATTCAACGCCGTT	WT	271	272	7.31e-05	78	79	5.84012e-05	418	419	6.69969e-05	NA	NA	NA	NA	NA	NA	NA	NA	NA	127	128	2.7209e-05	87	88	4.07419e-05	22	23	2.87825e-05	72	73	3.92853e-05	2	3	1.49547e-06	60	61	8.44152e-05	276	277	7.84699e-05	169	170	3.67352e-05	NA	NA	NA	NA	NA
INQSLMTL	ATCAATCAATCCCTCATGACGCTA	WT	94	95	2.55312e-05	43	44	3.25272e-05	227	228	3.64565e-05	NA	NA	NA	NA	NA	NA	NA	NA	NA	79	80	1.70056e-05	33	34	1.57412e-05	17	18	2.25254e-05	NA	1	5.38154e-07	NA	1	4.98492e-07	NA	1	1.38386e-06	NA	1	2.83285e-07	20	21	4.53788e-06	NA	NA	NA	NA	NA
INRSFLSF	ATCAACAGATCCTTTCTGTCGTTT	WT	492	493	0.000132494	150	151	0.000111628	755	756	0.000120882	NA	NA	NA	NA	NA	NA	NA	NA	NA	276	277	5.8882e-05	109	110	5.09274e-05	43	44	5.50622e-05	121	122	6.56548e-05	7	8	3.98793e-06	15	16	2.21417e-05	898	899	0.000254673	425	426	9.20541e-05	NA	NA	NA	NA	NA
INRSLLAL	ATAAACCGGTCATTGCTTGCGCTT	WT	439	440	0.00011825	182	183	0.000135284	796	797	0.000127438	NA	NA	NA	NA	NA	NA	NA	NA	NA	266	267	5.67563e-05	129	130	6.01869e-05	58	59	7.38333e-05	17	18	9.68678e-06	5	6	2.99095e-06	49	50	6.91928e-05	266	267	7.56371e-05	200	201	4.3434e-05	NA	NA	NA	NA	NA
INRTYFPF	ATCAATCGTACATACTTCCCGTTT	WT	469	470	0.000126312	158	159	0.000117542	753	754	0.000120562	NA	NA	NA	NA	NA	NA	NA	NA	NA	345	346	7.35494e-05	130	131	6.06499e-05	49	50	6.25706e-05	209	210	0.000113012	272	273	0.000136088	467	468	0.000647644	2355	2356	0.000667419	1138	1139	0.000246126	NA	NA	NA	NA	NA
INSRHPSL	ATAAATAGTCGTCACCCGTCCTTA	WT	549	550	0.000147812	209	210	0.000155244	1044	1045	0.000167092	NA	NA	NA	NA	NA	NA	NA	NA	NA	376	377	8.0139e-05	130	131	6.06499e-05	49	50	6.25706e-05	7	8	4.30523e-06	294	295	0.000147055	2	3	4.15157e-06	144	145	4.10763e-05	626	627	0.000135488	NA	NA	NA	NA	NA
INSYLKPM	ATCAATTCTTACTTAAAACCGATG	WT	776	777	0.000208819	307	308	0.000227691	1301	1302	0.000208186	NA	NA	NA	NA	NA	NA	NA	NA	NA	514	515	0.000109474	219	220	0.000101855	86	87	0.000108873	379	380	0.000204499	229	230	0.000114653	14	15	2.07578e-05	2477	2478	0.00070198	640	641	0.000138513	NA	NA	NA	NA	NA
INTYRGLL	ATAAACACTTACCGCGGGTTGCTG	WT	90	91	2.44562e-05	42	43	3.1788e-05	98	99	1.58298e-05	NA	NA	NA	NA	NA	NA	NA	NA	NA	65	66	1.40296e-05	16	17	7.87059e-06	9	10	1.25141e-05	NA	1	5.38154e-07	1	2	9.96983e-07	NA	1	1.38386e-06	NA	1	2.83285e-07	NA	1	2.1609e-07	NA	NA	NA	NA	NA
INVEFPVV	ATCAACGTTGAATTCCCGGTGGTA	WT	151	152	4.085e-05	52	53	3.91805e-05	284	285	4.55707e-05	NA	NA	NA	NA	NA	NA	NA	NA	NA	61	62	1.31794e-05	32	33	1.52782e-05	17	18	2.25254e-05	1	2	1.07631e-06	NA	1	4.98492e-07	NA	1	1.38386e-06	12	13	3.6827e-06	3	4	8.64358e-07	NA	NA	NA	NA	NA
INVTGYYL	ATTAACGTAACAGGATATTATCTC	WT	496	497	0.000133569	177	178	0.000131588	819	820	0.000131116	NA	NA	NA	NA	NA	NA	NA	NA	NA	340	341	7.24865e-05	156	157	7.26872e-05	66	67	8.38446e-05	407	408	0.000219567	37	38	1.89427e-05	1	2	2.76771e-06	522	523	0.000148158	187	188	4.06248e-05	NA	NA	NA	NA	NA
INWIQQVL	ATCAATTGGATACAACAAGTCCTT	WT	495	496	0.0001333	196	197	0.000145633	846	847	0.000135433	NA	NA	NA	NA	NA	NA	NA	NA	NA	290	291	6.1858e-05	136	137	6.34277e-05	63	64	8.00904e-05	3	4	2.15262e-06	128	129	6.43054e-05	2	3	4.15157e-06	177	178	5.04247e-05	85	86	1.85837e-05	NA	NA	NA	NA	NA
INYADYTL	ATAAACTACGCGGACTACACACTA	WT	222	223	5.99312e-05	131	132	9.75817e-05	530	531	8.49054e-05	NA	NA	NA	NA	NA	NA	NA	NA	NA	139	140	2.97599e-05	77	78	3.61121e-05	17	18	2.25254e-05	150	151	8.12613e-05	1	2	9.96983e-07	8	9	1.24547e-05	7	8	2.26628e-06	24	25	5.40224e-06	NA	NA	NA	NA	NA
INYLMLFI	ATTAATTACTTAATGCTCTTTATA	WT	973	974	0.000261762	358	359	0.000265393	1355	1356	0.00021682	NA	NA	NA	NA	NA	NA	NA	NA	NA	551	552	0.000117339	260	261	0.000120837	112	113	0.00014141	835	836	0.000449897	1056	1057	0.000526906	231	232	0.000321054	243	244	6.91215e-05	332	333	7.19578e-05	NA	NA	NA	NA	NA
INYNHKFI	ATCAACTATAATCACAAATTTATA	WT	864	865	0.000232469	293	294	0.000217341	1240	1241	0.000198432	NA	NA	NA	NA	NA	NA	NA	NA	NA	494	495	0.000105222	210	211	9.76879e-05	96	97	0.000121387	100	101	5.43536e-05	154	155	7.72662e-05	74	75	0.000103789	99	100	2.83285e-05	118	119	2.57147e-05	NA	NA	NA	NA	NA
INYSIIVI	ATTAATTACTCGATCATCGTTATT	WT	1346	1347	0.000362006	446	447	0.000330447	2133	2134	0.00034122	NA	NA	NA	NA	NA	NA	NA	NA	NA	875	876	0.000186212	351	352	0.000162968	144	145	0.000181455	98	99	5.32773e-05	156	157	7.82632e-05	607	608	0.000841384	295	296	8.38523e-05	1952	1953	0.000422023	NA	NA	NA	NA	NA
INYSLIEI	ATTAATTACTCATTAATAGAAATC	WT	1001	1002	0.000269287	386	387	0.000286092	1518	1519	0.000242884	NA	NA	NA	NA	NA	NA	NA	NA	NA	630	631	0.000134132	349	350	0.000162042	120	121	0.000151421	508	509	0.000273921	559	560	0.000279155	5	6	8.30313e-06	1868	1869	0.00052946	725	726	0.000156881	NA	NA	NA	NA	NA
INYTDCHI	ATTAATTATACAGATTGCCACATA	WT	1109	1110	0.000298312	422	423	0.000312705	1909	1910	0.000305403	NA	NA	NA	NA	NA	NA	NA	NA	NA	651	652	0.000138596	281	282	0.000130559	138	139	0.000173946	1560	1561	0.000840059	285	286	0.000142569	33	34	4.70511e-05	520	521	0.000147591	551	552	0.000119281	NA	NA	NA	NA	NA
INYYKFSS	ATTAATTACTACAAATTCTCATCC	WT	596	597	0.000160444	206	207	0.000153026	987	988	0.000157978	NA	NA	NA	NA	NA	NA	NA	NA	NA	359	360	7.65253e-05	172	173	8.00949e-05	53	54	6.75763e-05	437	438	0.000235712	28	29	1.44563e-05	36	37	5.12026e-05	116	117	3.31443e-05	374	375	8.10336e-05	NA	NA	NA	NA	NA
IPALYNNL	ATTCCAGCCCTATACAACAATCTT	WT	370	371	9.97062e-05	164	165	0.000121977	557	558	8.92226e-05	NA	NA	NA	NA	NA	NA	NA	NA	NA	224	225	4.78283e-05	89	90	4.16678e-05	40	41	5.13079e-05	54	55	2.95985e-05	24	25	1.24623e-05	NA	1	1.38386e-06	211	212	6.00564e-05	87	88	1.90159e-05	NA	NA	NA	NA	NA
IPFFYMTA	ATACCGTTCTTTTACATGACAGCT	WT	1221	1222	0.000328412	413	414	0.000306052	1945	1946	0.00031116	NA	NA	NA	NA	NA	NA	NA	NA	NA	713	714	0.000151775	357	358	0.000165745	140	141	0.000176449	197	198	0.000106555	214	215	0.000107176	178	179	0.00024771	722	723	0.000204815	1322	1323	0.000285886	NA	NA	NA	NA	NA
IPFLKANL	ATTCCCTTCCTCAAAGCTAATCTC	WT	830	831	0.000223331	247	248	0.000183335	1074	1075	0.000171889	NA	NA	NA	NA	NA	NA	NA	NA	NA	463	464	9.86327e-05	198	199	9.21322e-05	72	73	9.13531e-05	119	120	6.45785e-05	636	637	0.000317539	62	63	8.71829e-05	43	44	1.24645e-05	848	849	0.00018346	NA	NA	NA	NA	NA
IPFYIQAL	ATTCCGTTTTATATTCAGGCTTTA	WT	2257	2258	0.000606837	771	772	0.000570705	3564	3565	0.000570033	NA	NA	NA	NA	NA	NA	NA	NA	NA	1427	1428	0.000303551	684	685	0.000317139	225	226	0.000282819	643	644	0.000346571	3547	3548	0.00176865	238	239	0.000330741	764	765	0.000216713	2301	2302	0.000497438	NA	NA	NA	NA	NA
IPIFLMYL	ATTCCAATATTCCTGATGTATTTA	WT	901	902	0.000242412	332	333	0.000246172	1502	1503	0.000240325	NA	NA	NA	NA	NA	NA	NA	NA	NA	566	567	0.000120527	278	279	0.00012917	99	100	0.000125141	47	48	2.58314e-05	4	5	2.49246e-06	10	11	1.52224e-05	827	828	0.00023456	660	661	0.000142835	NA	NA	NA	NA	NA
IPLLFKML	ATTCCACTATTGTTCAAGATGCTC	WT	584	585	0.000157219	175	176	0.000130109	824	825	0.000131915	NA	NA	NA	NA	NA	NA	NA	NA	NA	306	307	6.52591e-05	143	144	6.66685e-05	53	54	6.75763e-05	375	376	0.000202346	27	28	1.39578e-05	2	3	4.15157e-06	12	13	3.6827e-06	318	319	6.89326e-05	NA	NA	NA	NA	NA
IPNIYAAL	ATTCCTAATATATATGCTGCATTG	WT	985	986	0.000264987	384	385	0.000284613	1634	1635	0.000261432	NA	NA	NA	NA	NA	NA	NA	NA	NA	692	693	0.000147311	285	286	0.000132411	103	104	0.000130147	367	368	0.000198041	141	142	7.07858e-05	1	2	2.76771e-06	211	212	6.00564e-05	829	830	0.000179354	NA	NA	NA	NA	NA
IPVFAAML	ATACCGGTATTTGCCGCGATGCTG	WT	328	329	8.84187e-05	131	132	9.75817e-05	649	650	0.000103933	NA	NA	NA	NA	NA	NA	NA	NA	NA	211	212	4.50649e-05	92	93	4.30568e-05	35	36	4.50509e-05	2	3	1.61446e-06	88	89	4.43657e-05	1	2	2.76771e-06	2032	2033	0.000575918	9	10	2.1609e-06	NA	NA	NA	NA	NA
IQFGFATL	ATACAGTTCGGATTTGCAACTCTA	WT	2330	2331	0.000626456	944	945	0.000698597	3995	3996	0.000638949	NA	NA	NA	NA	NA	NA	NA	NA	NA	1385	1386	0.000294623	600	601	0.000278249	257	258	0.000322864	2625	2626	0.00141319	852	853	0.000425213	383	384	0.0005314	115	116	3.28611e-05	10395	10396	0.00224647	NA	NA	NA	NA	NA
IQFHYGGC	ATACAGTTCCATTATGGTGGGTGT	WT	155	156	4.1925e-05	69	70	5.17479e-05	343	344	5.50046e-05	NA	NA	NA	NA	NA	NA	NA	NA	NA	141	142	3.0185e-05	59	60	2.77786e-05	17	18	2.25254e-05	21	22	1.18394e-05	NA	1	4.98492e-07	NA	1	1.38386e-06	749	750	0.000212464	25	26	5.61833e-06	NA	NA	NA	NA	NA
IQFIQSYF	ATTCAGTTTATCCAAAGCTACTTC	WT	565	566	0.000152112	184	185	0.000136762	893	894	0.000142948	NA	NA	NA	NA	NA	NA	NA	NA	NA	308	309	6.56843e-05	152	153	7.08353e-05	57	58	7.25819e-05	22	23	1.23775e-05	486	487	0.000242765	32	33	4.56672e-05	596	597	0.000169121	163	164	3.54387e-05	NA	NA	NA	NA	NA
IQFLISLV	ATCCAATTCCTAATCAGCCTCGTT	WT	279	280	7.525e-05	132	133	9.8321e-05	663	664	0.000106172	NA	NA	NA	NA	NA	NA	NA	NA	NA	237	238	5.05918e-05	118	119	5.50941e-05	23	24	3.00339e-05	164	165	8.87955e-05	57	58	2.89125e-05	2	3	4.15157e-06	7	8	2.26628e-06	317	318	6.87165e-05	NA	NA	NA	NA	NA
IQFLLAAV	ATCCAATTCTTATTAGCAGCCGTA	WT	696	697	0.000187319	286	287	0.000212166	1064	1065	0.00017029	NA	NA	NA	NA	NA	NA	NA	NA	NA	416	417	8.86419e-05	194	195	9.02803e-05	67	68	8.50961e-05	1115	1116	0.00060058	1479	1480	0.000737768	1	2	2.76771e-06	12	13	3.6827e-06	547	548	0.000118417	NA	NA	NA	NA	NA
IQFSAGSV	ATACAGTTTTCGGCGGGCTCTGTA	WT	732	733	0.000196994	237	238	0.000175943	1217	1218	0.000194755	NA	NA	NA	NA	NA	NA	NA	NA	NA	407	408	8.67287e-05	209	210	9.7225e-05	79	80	0.000100113	303	304	0.000163599	30	31	1.54532e-05	48	49	6.78089e-05	8	9	2.54956e-06	7	8	1.72872e-06	NA	NA	NA	NA	NA
IQFTHCLV	ATTCAATTTACCCACTGTCTAGTT	WT	1387	1388	0.000373025	572	573	0.000423593	2403	2404	0.000384393	NA	NA	NA	NA	NA	NA	NA	NA	NA	1157	1158	0.000246157	455	456	0.000211117	171	172	0.000215243	149	150	8.07232e-05	494	495	0.000246753	109	110	0.000152224	934	935	0.000264871	1237	1238	0.000267519	NA	NA	NA	NA	NA
IQFVYHLI	ATCCAGTTCGTCTATCACCTAATA	WT	690	691	0.000185706	312	313	0.000231387	1291	1292	0.000206587	NA	NA	NA	NA	NA	NA	NA	NA	NA	456	457	9.71447e-05	182	183	8.47246e-05	85	86	0.000107621	6	7	3.76708e-06	74	75	3.73869e-05	1	2	2.76771e-06	384	385	0.000109065	1839	1840	0.000397605	NA	NA	NA	NA	NA
IQIFRAHL	ATTCAAATCTTTCGAGCTCACCTG	WT	504	505	0.000135719	217	218	0.000161158	882	883	0.000141189	NA	NA	NA	NA	NA	NA	NA	NA	NA	300	301	6.39837e-05	174	175	8.10208e-05	59	60	7.50848e-05	55	56	3.01366e-05	3	4	1.99397e-06	9	10	1.38386e-05	228	229	6.48722e-05	57	58	1.25332e-05	NA	NA	NA	NA	NA
IQKMFEKL	ATTCAGAAAATGTTCGAGAAACTG	WT	214	215	5.77812e-05	131	132	9.75817e-05	417	418	6.6837e-05	NA	NA	NA	NA	NA	NA	NA	NA	NA	157	158	3.35861e-05	88	89	4.12049e-05	26	27	3.37881e-05	216	217	0.000116779	1356	1357	0.000676453	83	84	0.000116244	NA	1	2.83285e-07	3	4	8.64358e-07	NA	NA	NA	NA	NA
IQLLCYLL	ATCCAATTGCTCTGTTATCTGTTG	WT	3475	3476	0.000934175	1168	1169	0.00086419	5913	5914	0.000945631	NA	NA	NA	NA	NA	NA	NA	NA	NA	2141	2142	0.000455326	917	918	0.000425012	383	384	0.000480542	6227	6228	0.00335163	1472	1473	0.000734278	465	466	0.000644876	1288	1289	0.000365154	1775	1776	0.000383775	NA	NA	NA	NA	NA
IQMAKFRI	ATCCAGATGGCCAAATTTCGCATA	WT	173	174	4.67625e-05	58	59	4.36161e-05	339	340	5.4365e-05	NA	NA	NA	NA	NA	NA	NA	NA	NA	105	106	2.25325e-05	43	44	2.03709e-05	26	27	3.37881e-05	12	13	6.99601e-06	1136	1137	0.000566785	73	74	0.000102405	7	8	2.26628e-06	9	10	2.1609e-06	NA	NA	NA	NA	NA
IQMYFLLL	ATACAAATGTACTTCCTGTTGTTA	WT	848	849	0.000228169	365	366	0.000270568	1380	1381	0.000220818	NA	NA	NA	NA	NA	NA	NA	NA	NA	540	541	0.000115001	230	231	0.000106947	93	94	0.000117633	78	79	4.25142e-05	126	127	6.33084e-05	30	31	4.28995e-05	126	127	3.59772e-05	1281	1282	0.000277027	NA	NA	NA	NA	NA
IQQVLAPL	ATTCAGCAAGTGCTGGCGCCGTTG	WT	164	165	4.43437e-05	41	42	3.10487e-05	404	405	6.47583e-05	NA	NA	NA	NA	NA	NA	NA	NA	NA	101	102	2.16822e-05	44	45	2.08339e-05	18	19	2.37768e-05	21	22	1.18394e-05	196	197	9.82028e-05	NA	1	1.38386e-06	7	8	2.26628e-06	1	2	4.32179e-07	NA	NA	NA	NA	NA
IQTMHSNL	ATCCAGACAATGCATTCAAATCTA	WT	259	260	6.9875e-05	131	132	9.75817e-05	600	601	9.60982e-05	NA	NA	NA	NA	NA	NA	NA	NA	NA	188	189	4.01758e-05	94	95	4.39827e-05	46	47	5.88164e-05	67	68	3.65945e-05	7	8	3.98793e-06	NA	1	1.38386e-06	8	9	2.54956e-06	55	56	1.2101e-05	NA	NA	NA	NA	NA
IQVLFTAV	ATTCAGGTTTTGTTTACAGCCGTT	WT	1670	1671	0.000449081	635	636	0.000470167	3097	3098	0.000495361	NA	NA	NA	NA	NA	NA	NA	NA	NA	1109	1110	0.000235953	568	569	0.000263433	179	180	0.000225254	362	363	0.00019535	583	584	0.000291119	540	541	0.000748666	1766	1767	0.000500564	631	632	0.000136569	NA	NA	NA	NA	NA
IQWIRHHV	ATACAGTGGATTAGGCATCATGTA	WT	310	311	8.35812e-05	75	76	5.61834e-05	423	424	6.77964e-05	NA	NA	NA	NA	NA	NA	NA	NA	NA	199	200	4.25141e-05	72	73	3.37973e-05	33	34	4.2548e-05	1	2	1.07631e-06	48	49	2.44261e-05	NA	1	1.38386e-06	8	9	2.54956e-06	2	3	6.48269e-07	NA	NA	NA	NA	NA
IQYKKAQL	ATTCAATACAAGAAAGCTCAATTG	WT	356	357	9.59437e-05	140	141	0.000104235	649	650	0.000103933	NA	NA	NA	NA	NA	NA	NA	NA	NA	223	224	4.76158e-05	79	80	3.70381e-05	30	31	3.87938e-05	NA	1	5.38154e-07	17	18	8.97285e-06	1	2	2.76771e-06	19	20	5.6657e-06	NA	1	2.1609e-07	NA	NA	NA	NA	NA
IQYRDANL	ATACAATACAGGGATGCCAACCTC	WT	163	164	4.4075e-05	55	56	4.13983e-05	404	405	6.47583e-05	NA	NA	NA	NA	NA	NA	NA	NA	NA	112	113	2.40205e-05	36	37	1.71301e-05	16	17	2.1274e-05	72	73	3.92853e-05	2	3	1.49547e-06	15	16	2.21417e-05	21	22	6.23227e-06	151	152	3.28456e-05	NA	NA	NA	NA	NA
IRYALLLL	ATTCGCTATGCATTGCTTCTGCTA	WT	649	650	0.000174687	223	224	0.000165593	952	953	0.000152382	NA	NA	NA	NA	NA	NA	NA	NA	NA	352	353	7.50373e-05	198	199	9.21322e-05	77	78	9.76102e-05	82	83	4.46668e-05	85	86	4.28703e-05	7	8	1.10708e-05	51	52	1.47308e-05	1983	1984	0.000428722	NA	NA	NA	NA	NA
ISAALALM	ATTTCAGCCGCATTAGCCCTCATG	WT	461	462	0.000124162	189	190	0.000140459	746	747	0.000119443	NA	NA	NA	NA	NA	NA	NA	NA	NA	298	299	6.35585e-05	148	149	6.89834e-05	74	75	9.38559e-05	43	44	2.36788e-05	2180	2181	0.00108721	8	9	1.24547e-05	1886	1887	0.000534559	349	350	7.56313e-05	NA	NA	NA	NA	NA
ISAFLAVF	ATCAGCGCATTCCTAGCTGTGTTC	WT	304	305	8.19687e-05	114	115	8.50144e-05	531	532	8.50653e-05	NA	NA	NA	NA	NA	NA	NA	NA	NA	210	211	4.48524e-05	102	103	4.76865e-05	24	25	3.12853e-05	16	17	9.14862e-06	325	326	0.000162508	120	121	0.000167446	3	4	1.13314e-06	524	525	0.000113447	NA	NA	NA	NA	NA
ISAKSHNL	ATATCGGCCAAGTCACATAACCTA	WT	194	195	5.24062e-05	76	77	5.69227e-05	354	355	5.67635e-05	NA	NA	NA	NA	NA	NA	NA	NA	NA	151	152	3.23107e-05	53	54	2.50007e-05	21	22	2.75311e-05	24	25	1.34539e-05	5	6	2.99095e-06	NA	1	1.38386e-06	12	13	3.6827e-06	64	65	1.40458e-05	NA	NA	NA	NA	NA
ISALSSGL	ATTAGCGCACTCTCATCGGGCCTG	WT	92	93	2.49937e-05	38	39	2.8831e-05	195	196	3.13398e-05	NA	NA	NA	NA	NA	NA	NA	NA	NA	37	38	8.07767e-06	24	25	1.15744e-05	7	8	1.00113e-05	NA	1	5.38154e-07	2	3	1.49547e-06	7	8	1.10708e-05	1	2	5.6657e-07	8	9	1.94481e-06	NA	NA	NA	NA	NA
ISALWEGL	ATCTCTGCCCTGTGGGAGGGATTA	WT	944	945	0.000253969	365	366	0.000270568	1990	1991	0.000318355	NA	NA	NA	NA	NA	NA	NA	NA	NA	644	645	0.000137108	335	336	0.00015556	122	123	0.000153924	54	55	2.95985e-05	60	61	3.0408e-05	70	71	9.82537e-05	1119	1120	0.000317279	988	989	0.000213713	NA	NA	NA	NA	NA
ISAQIGTL	ATTAGCGCCCAGATCGGGACGTTG	WT	70	71	1.90812e-05	27	28	2.06992e-05	146	147	2.35049e-05	NA	NA	NA	NA	NA	NA	NA	NA	NA	44	45	9.56567e-06	13	14	6.48166e-06	4	5	6.25706e-06	741	742	0.000399311	8	9	4.48642e-06	NA	1	1.38386e-06	NA	1	2.83285e-07	44	45	9.72403e-06	NA	NA	NA	NA	NA
ISASRWLL	ATCTCTGCATCGAGATGGCTATTA	WT	1235	1236	0.000332175	498	499	0.000368889	1994	1995	0.000318995	NA	NA	NA	NA	NA	NA	NA	NA	NA	722	723	0.000153688	303	304	0.000140745	125	126	0.000157678	696	697	0.000375094	158	159	7.92602e-05	5	6	8.30313e-06	211	212	6.00564e-05	2677	2678	0.000578688	NA	NA	NA	NA	NA
ISAYRKLL	ATTTCAGCCTACCGAAAGTTGCTA	WT	247	248	6.665e-05	105	106	7.83611e-05	481	482	7.70704e-05	NA	NA	NA	NA	NA	NA	NA	NA	NA	175	176	3.74124e-05	85	86	3.98159e-05	23	24	3.00339e-05	110	111	5.97351e-05	22	23	1.14653e-05	94	95	0.000131466	NA	1	2.83285e-07	27	28	6.05051e-06	NA	NA	NA	NA	NA
ISCSFGSV	ATATCGTGCTCTTTTGGATCCGTC	WT	2147	2148	0.000577275	753	754	0.000557399	3660	3661	0.000585383	NA	NA	NA	NA	NA	NA	NA	NA	NA	1199	1200	0.000255084	594	595	0.000275471	199	200	0.000250283	383	384	0.000206651	695	696	0.00034695	1463	1464	0.00202596	2147	2148	0.000608496	5767	5768	0.0012464	NA	NA	NA	NA	NA
ISDFLAFL	ATTAGTGATTTTCTCGCGTTCCTC	WT	842	843	0.000226556	268	269	0.00019886	1414	1415	0.000226254	NA	NA	NA	NA	NA	NA	NA	NA	NA	482	483	0.000102671	213	214	9.90769e-05	77	78	9.76102e-05	12	13	6.99601e-06	110	111	5.53326e-05	27	28	3.87479e-05	246	247	6.99714e-05	589	590	0.000127493	NA	NA	NA	NA	NA
ISDLLFLL	ATCTCTGACCTTCTCTTCCTACTC	WT	985	986	0.000264987	358	359	0.000265393	1441	1442	0.000230572	NA	NA	NA	NA	NA	NA	NA	NA	NA	611	612	0.000130093	279	280	0.000129633	123	124	0.000155175	362	363	0.00019535	330	331	0.000165001	10	11	1.52224e-05	685	686	0.000194333	2044	2045	0.000441903	NA	NA	NA	NA	NA
ISDRLVTL	ATATCAGACAGACTCGTGACACTG	WT	128	129	3.46687e-05	46	47	3.4745e-05	301	302	4.82889e-05	NA	NA	NA	NA	NA	NA	NA	NA	NA	142	143	3.03976e-05	43	44	2.03709e-05	20	21	2.62797e-05	7	8	4.30523e-06	866	867	0.000432192	6	7	9.68699e-06	278	279	7.90365e-05	2	3	6.48269e-07	NA	NA	NA	NA	NA
ISDSFFFL	ATCAGCGATTCTTTCTTCTTCTTA	WT	1297	1298	0.000348837	423	424	0.000313444	1693	1694	0.000270866	NA	NA	NA	NA	NA	NA	NA	NA	NA	740	741	0.000157515	355	356	0.000164819	128	129	0.000161432	138	139	7.48035e-05	1107	1108	0.000552329	3	4	5.53542e-06	546	547	0.000154957	471	472	0.000101994	NA	NA	NA	NA	NA
ISEYYGML	ATCAGTGAATATTATGGGATGCTT	WT	555	556	0.000149425	246	247	0.000182596	864	865	0.000138311	NA	NA	NA	NA	NA	NA	NA	NA	NA	349	350	7.43996e-05	169	170	7.87059e-05	49	50	6.25706e-05	444	445	0.000239479	5	6	2.99095e-06	105	106	0.000146689	32	33	9.3484e-06	337	338	7.30383e-05	NA	NA	NA	NA	NA
ISFCNSGL	ATATCCTTCTGTAACAGTGGCCTC	WT	39	40	1.075e-05	16	17	1.25673e-05	46	47	7.51516e-06	NA	NA	NA	NA	NA	NA	NA	NA	NA	31	32	6.80225e-06	13	14	6.48166e-06	4	5	6.25706e-06	NA	1	5.38154e-07	NA	1	4.98492e-07	NA	1	1.38386e-06	115	116	3.28611e-05	1	2	4.32179e-07	NA	NA	NA	NA	NA
ISFCPTDL	ATCTCTTTCTGTCCTACAGATCTC	WT	749	750	0.000201562	329	330	0.000243954	1249	1250	0.000199871	NA	NA	NA	NA	NA	NA	NA	NA	NA	513	514	0.000109261	278	279	0.00012917	81	82	0.000102616	693	694	0.000373479	124	125	6.23114e-05	172	173	0.000239407	119	120	3.39942e-05	903	904	0.000195345	NA	NA	NA	NA	NA
ISFENVSF	ATCTCTTTTGAGAATGTAAGCTTC	WT	701	702	0.000188662	235	236	0.000174464	1063	1064	0.000170131	NA	NA	NA	NA	NA	NA	NA	NA	NA	394	395	8.39653e-05	173	174	8.05578e-05	79	80	0.000100113	62	63	3.39037e-05	183	184	9.17224e-05	NA	1	1.38386e-06	269	270	7.64869e-05	713	714	0.000154288	NA	NA	NA	NA	NA
ISFGCCMM	ATTTCGTTTGGTTGTTGCATGATG	WT	1039	1040	0.0002795	395	396	0.000292745	1765	1766	0.000282378	NA	NA	NA	NA	NA	NA	NA	NA	NA	604	605	0.000128605	328	329	0.000152319	103	104	0.000130147	162	163	8.77192e-05	188	189	9.42149e-05	180	181	0.000250478	328	329	9.32007e-05	5713	5714	0.00123474	NA	NA	NA	NA	NA
ISFIDYFI	ATTTCCTTCATCGACTATTTCATA	WT	2925	2926	0.000786362	964	965	0.000713382	4162	4163	0.000665652	NA	NA	NA	NA	NA	NA	NA	NA	NA	1728	1729	0.000367534	759	760	0.000351862	268	269	0.00033663	589	590	0.000317511	2466	2467	0.00122978	1015	1016	0.001406	1310	1311	0.000371387	3515	3516	0.000759771	NA	NA	NA	NA	NA
ISFIFKYN	ATCTCTTTTATTTTCAAATACAAT	WT	607	608	0.0001634	211	212	0.000156722	872	873	0.00013959	NA	NA	NA	NA	NA	NA	NA	NA	NA	336	337	7.16362e-05	147	148	6.85205e-05	57	58	7.25819e-05	162	163	8.77192e-05	188	189	9.42149e-05	2	3	4.15157e-06	3675	3676	0.00104136	4669	4670	0.00100914	NA	NA	NA	NA	NA
ISFIVLMI	ATAAGTTTTATCGTCCTCATGATA	WT	1617	1618	0.000434837	633	634	0.000468688	2824	2825	0.000451709	NA	NA	NA	NA	NA	NA	NA	NA	NA	1054	1055	0.000224262	493	494	0.00022871	173	174	0.000217746	1632	1633	0.000878806	283	284	0.000141572	146	147	0.000203427	523	524	0.000148441	22442	22443	0.0048497	NA	NA	NA	NA	NA
ISFLGART	ATATCGTTCCTAGGAGCCCGAACC	WT	351	352	9.46e-05	154	155	0.000114585	562	563	9.00221e-05	NA	NA	NA	NA	NA	NA	NA	NA	NA	162	163	3.4649e-05	113	114	5.27793e-05	40	41	5.13079e-05	105	106	5.70444e-05	2	3	1.49547e-06	433	434	0.000600593	478	479	0.000135693	34	35	7.56313e-06	NA	NA	NA	NA	NA
ISFLGCIM	ATAAGTTTTCTAGGTTGCATTATG	WT	1403	1404	0.000377325	475	476	0.000351886	2453	2454	0.000392387	NA	NA	NA	NA	NA	NA	NA	NA	NA	949	950	0.000201942	397	398	0.000184264	144	145	0.000181455	1370	1371	0.00073781	109	110	5.48341e-05	489	490	0.000678089	649	650	0.000184135	278	279	6.0289e-05	NA	NA	NA	NA	NA
ISFLILPM	ATTAGTTTTCTTATACTTCCAATG	WT	647	648	0.00017415	215	216	0.000159679	1117	1118	0.000178765	NA	NA	NA	NA	NA	NA	NA	NA	NA	431	432	9.18304e-05	217	218	0.000100929	78	79	9.88616e-05	114	115	6.18877e-05	385	386	0.000192418	2	3	4.15157e-06	440	441	0.000124929	505	506	0.000109341	NA	NA	NA	NA	NA
ISFLLRSC	ATCTCCTTTCTGCTCCGATCGTGT	WT	449	450	0.000120937	190	191	0.000141198	863	864	0.000138151	NA	NA	NA	NA	NA	NA	NA	NA	NA	339	340	7.22739e-05	166	167	7.7317e-05	40	41	5.13079e-05	224	225	0.000121085	248	249	0.000124124	25	26	3.59802e-05	85	86	2.43625e-05	5150	5151	0.00111308	NA	NA	NA	NA	NA
ISFLNSFC	ATTTCCTTCTTAAATTCATTTTGC	WT	1777	1778	0.000477837	584	585	0.000432465	2513	2514	0.000401981	NA	NA	NA	NA	NA	NA	NA	NA	NA	1092	1093	0.000232339	562	563	0.000260656	190	191	0.00023902	259	260	0.00013992	2432	2433	0.00121283	281	282	0.000390247	208	209	5.92065e-05	2982	2983	0.000644595	NA	NA	NA	NA	NA
ISFQGCVV	ATCTCGTTTCAGGGATGTGTTGTG	WT	277	278	7.47125e-05	92	93	6.87508e-05	536	537	8.58647e-05	NA	NA	NA	NA	NA	NA	NA	NA	NA	194	195	4.14512e-05	92	93	4.30568e-05	27	28	3.50396e-05	71	72	3.87471e-05	NA	1	4.98492e-07	NA	1	1.38386e-06	30	31	8.78183e-06	6	7	1.51263e-06	NA	NA	NA	NA	NA
ISFRGLFI	ATCTCTTTTCGAGGGCTGTTTATT	WT	1408	1409	0.000378669	415	416	0.00030753	2001	2002	0.000320114	NA	NA	NA	NA	NA	NA	NA	NA	NA	774	775	0.000164742	385	386	0.000178709	155	156	0.00019522	533	534	0.000287374	2014	2015	0.00100446	731	732	0.00101298	557	558	0.000158073	346	347	7.49831e-05	NA	NA	NA	NA	NA
ISFRRVAC	ATATCTTTCCGGCGAGTGGCATGT	WT	307	308	8.2775e-05	121	122	9.01892e-05	474	475	7.59511e-05	NA	NA	NA	NA	NA	NA	NA	NA	NA	200	201	4.27266e-05	84	85	3.9353e-05	29	30	3.75424e-05	398	399	0.000214724	2027	2028	0.00101094	146	147	0.000203427	18	19	5.38241e-06	163	164	3.54387e-05	NA	NA	NA	NA	NA
ISFRSCAA	ATCAGTTTCCGCTCGTGTGCGGCA	WT	34	35	9.40625e-06	20	21	1.55244e-05	105	106	1.69491e-05	NA	NA	NA	NA	NA	NA	NA	NA	NA	29	30	6.37711e-06	20	21	9.7225e-06	4	5	6.25706e-06	25	26	1.3992e-05	NA	1	4.98492e-07	NA	1	1.38386e-06	3	4	1.13314e-06	13	14	3.02525e-06	NA	NA	NA	NA	NA
ISFSETAL	ATCAGCTTTTCCGAGACGGCGCTA	WT	166	167	4.48812e-05	63	64	4.73124e-05	348	349	5.58041e-05	NA	NA	NA	NA	NA	NA	NA	NA	NA	125	126	2.67839e-05	31	32	1.48152e-05	16	17	2.1274e-05	NA	1	5.38154e-07	5	6	2.99095e-06	155	156	0.000215881	54	55	1.55807e-05	NA	1	2.1609e-07	NA	NA	NA	NA	NA
ISFSILGL	ATATCCTTTAGCATACTAGGATTG	WT	3972	3973	0.00106774	1576	1577	0.00116581	6570	6571	0.00105068	NA	NA	NA	NA	NA	NA	NA	NA	NA	2439	2440	0.000518672	1167	1168	0.000540756	417	418	0.00052309	1611	1612	0.000867505	1958	1959	0.000976545	89	90	0.000124547	2556	2557	0.00072436	1108	1109	0.000239643	NA	NA	NA	NA	NA
ISFSRILA	ATATCCTTCTCACGTATCCTCGCC	WT	708	709	0.000190544	279	280	0.000206992	1009	1010	0.000161496	NA	NA	NA	NA	NA	NA	NA	NA	NA	376	377	8.0139e-05	192	193	8.93544e-05	64	65	8.13418e-05	92	93	5.00484e-05	95	96	4.78552e-05	111	112	0.000154992	82	83	2.35126e-05	1723	1724	0.000372538	NA	NA	NA	NA	NA
ISFSSGCL	ATATCGTTCAGTTCTGGATGTCTA	WT	1048	1049	0.000281919	395	396	0.000292745	1929	1930	0.000308601	NA	NA	NA	NA	NA	NA	NA	NA	NA	643	644	0.000136895	275	276	0.000127781	110	111	0.000138907	1732	1733	0.000932621	54	55	2.7417e-05	17	18	2.49094e-05	3166	3167	0.000897163	1304	1305	0.000281997	NA	NA	NA	NA	NA
ISFTPTVL	ATATCATTCACCCCAACAGTCTTA	WT	157	158	4.24625e-05	84	85	6.28367e-05	301	302	4.82889e-05	NA	NA	NA	NA	NA	NA	NA	NA	NA	132	133	2.82719e-05	61	62	2.87045e-05	38	39	4.88051e-05	147	148	7.96468e-05	6	7	3.48944e-06	108	109	0.00015084	198	199	5.63737e-05	24	25	5.40224e-06	NA	NA	NA	NA	NA
ISFVGCSI	ATATCTTTCGTTGGGTGCTCGATA	WT	365	366	9.83625e-05	151	152	0.000112367	522	523	8.36262e-05	NA	NA	NA	NA	NA	NA	NA	NA	NA	205	206	4.37895e-05	96	97	4.49087e-05	27	28	3.50396e-05	13	14	7.53416e-06	2	3	1.49547e-06	7	8	1.10708e-05	1	2	5.6657e-07	58	59	1.27493e-05	NA	NA	NA	NA	NA
ISFVLLAA	ATTAGTTTCGTGCTTCTAGCTGCG	WT	611	612	0.000164475	212	213	0.000157461	888	889	0.000142149	NA	NA	NA	NA	NA	NA	NA	NA	NA	267	268	5.69689e-05	144	145	6.71315e-05	46	47	5.88164e-05	275	276	0.000148531	99	100	4.98492e-05	NA	1	1.38386e-06	689	690	0.000195467	233	234	5.05649e-05	NA	NA	NA	NA	NA
ISFYNALL	ATTAGCTTCTACAATGCCTTGTTA	WT	1064	1065	0.000286219	389	390	0.00028831	1741	1742	0.000278541	NA	NA	NA	NA	NA	NA	NA	NA	NA	621	622	0.000132219	269	270	0.000125004	140	141	0.000176449	105	106	5.70444e-05	66	67	3.33989e-05	21	22	3.04448e-05	147	148	4.19262e-05	594	595	0.000128573	NA	NA	NA	NA	NA
ISGFEAQL	ATTTCAGGTTTCGAGGCCCAATTA	WT	1482	1483	0.000398556	495	496	0.000366671	2576	2577	0.000412055	NA	NA	NA	NA	NA	NA	NA	NA	NA	933	934	0.000198541	422	423	0.000195839	161	162	0.000202729	15437	15438	0.00830803	525	526	0.000262207	78	79	0.000109325	1704	1705	0.000483001	1002	1003	0.000216738	NA	NA	NA	NA	NA
ISGYSLRL	ATTTCCGGCTATAGCCTTCGTCTC	WT	1236	1237	0.000332444	390	391	0.000289049	2096	2097	0.000335304	NA	NA	NA	NA	NA	NA	NA	NA	NA	800	801	0.000170269	332	333	0.000154171	137	138	0.000172695	572	573	0.000308362	5168	5169	0.0025767	79	80	0.000110708	1249	1250	0.000354106	207	208	4.49466e-05	NA	NA	NA	NA	NA
ISHFYSVS	ATTTCACATTTCTATAGCGTATCT	WT	753	754	0.000202637	265	266	0.000196642	1133	1134	0.000181323	NA	NA	NA	NA	NA	NA	NA	NA	NA	457	458	9.73572e-05	240	241	0.000111577	69	70	8.75989e-05	93	94	5.05865e-05	714	715	0.000356421	7	8	1.10708e-05	1633	1634	0.000462888	303	304	6.56912e-05	NA	NA	NA	NA	NA
ISHMLLPF	ATATCTCATATGCTGTTACCCTTC	WT	1091	1092	0.000293475	447	448	0.000331187	1761	1762	0.000281739	NA	NA	NA	NA	NA	NA	NA	NA	NA	711	712	0.00015135	311	312	0.000144449	130	131	0.000163935	217	218	0.000117318	336	337	0.000167992	57	58	8.02636e-05	223	224	6.34558e-05	1108	1109	0.000239643	NA	NA	NA	NA	NA
ISHPRRLL	ATTTCTCACCCGCGCCGACTCCTG	WT	253	254	6.82625e-05	83	84	6.20975e-05	421	422	6.74766e-05	NA	NA	NA	NA	NA	NA	NA	NA	NA	146	147	3.12478e-05	57	58	2.68526e-05	16	17	2.1274e-05	33	34	1.82972e-05	2	3	1.49547e-06	1	2	2.76771e-06	6	7	1.98299e-06	21	22	4.75397e-06	NA	NA	NA	NA	NA
ISHQHQKL	ATTTCGCATCAACATCAGAAATTA	WT	1060	1061	0.000285144	336	337	0.000249129	1679	1680	0.000268627	NA	NA	NA	NA	NA	NA	NA	NA	NA	635	636	0.000135195	255	256	0.000118522	94	95	0.000118884	90	91	4.8972e-05	244	245	0.00012213	45	46	6.36573e-05	612	613	0.000173654	125	126	2.72273e-05	NA	NA	NA	NA	NA
ISHYFCDL	ATCTCGCACTACTTCTGTGACTTA	WT	422	423	0.000113681	168	169	0.000124934	788	789	0.000126159	NA	NA	NA	NA	NA	NA	NA	NA	NA	288	289	6.14328e-05	142	143	6.62056e-05	53	54	6.75763e-05	427	428	0.00023033	15	16	7.97587e-06	98	99	0.000137002	147	148	4.19262e-05	67	68	1.46941e-05	NA	NA	NA	NA	NA
ISIETAQL	ATCTCGATAGAAACCGCCCAGTTA	WT	642	643	0.000172806	318	319	0.000235823	1511	1512	0.000241764	NA	NA	NA	NA	NA	NA	NA	NA	NA	549	550	0.000116914	184	185	8.56506e-05	96	97	0.000121387	329	330	0.000177591	1339	1340	0.000667979	232	233	0.000322438	75	76	2.15297e-05	364	365	7.88727e-05	NA	NA	NA	NA	NA
ISIFHGII	ATCAGCATTTTCCACGGTATCATA	WT	928	929	0.000249669	345	346	0.000255782	1393	1394	0.000222897	NA	NA	NA	NA	NA	NA	NA	NA	NA	512	513	0.000109049	205	206	9.53731e-05	88	89	0.000111376	110	111	5.97351e-05	252	253	0.000126118	51	52	7.19605e-05	446	447	0.000126628	318	319	6.89326e-05	NA	NA	NA	NA	NA
ISIFTAIL	ATTTCTATCTTCACAGCCATACTC	WT	1071	1072	0.0002881	361	362	0.000267611	1601	1602	0.000256155	NA	NA	NA	NA	NA	NA	NA	NA	NA	607	608	0.000129243	282	283	0.000131022	106	107	0.000133901	23	24	1.29157e-05	290	291	0.000145061	141	142	0.000196507	53	54	1.52974e-05	446	447	9.6592e-05	NA	NA	NA	NA	NA
ISIFVAIF	ATCTCTATTTTCGTTGCCATCTTC	WT	471	472	0.00012685	180	181	0.000133805	795	796	0.000127278	NA	NA	NA	NA	NA	NA	NA	NA	NA	362	363	7.71631e-05	171	172	7.96319e-05	51	52	6.50735e-05	1120	1121	0.000603271	34	35	1.74472e-05	1	2	2.76771e-06	86	87	2.46458e-05	238	239	5.16454e-05	NA	NA	NA	NA	NA
ISILNSML	ATTTCGATACTGAACAGCATGCTC	WT	NA	1	2.6875e-07	NA	1	7.39256e-07	NA	1	1.59897e-07	NA	NA	NA	NA	NA	NA	NA	NA	NA	NA	1	2.1257e-07	NA	1	4.62976e-07	NA	1	1.25141e-06	NA	1	5.38154e-07	NA	1	4.98492e-07	NA	1	1.38386e-06	NA	1	2.83285e-07	NA	1	2.1609e-07	NA	NA	NA	NA	NA
ISILWIPI	ATTTCAATATTATGGATACCGATT	WT	1456	1457	0.000391569	525	526	0.000388848	2254	2255	0.000360568	NA	NA	NA	NA	NA	NA	NA	NA	NA	922	923	0.000196202	430	431	0.000199543	147	148	0.000185209	271	272	0.000146378	3181	3182	0.0015862	31	32	4.42834e-05	784	785	0.000222379	744	745	0.000160987	NA	NA	NA	NA	NA
ISIMYREV	ATATCTATCATGTATAGAGAGGTA	WT	467	468	0.000125775	132	133	9.8321e-05	596	597	9.54586e-05	NA	NA	NA	NA	NA	NA	NA	NA	NA	230	231	4.91038e-05	112	113	5.23163e-05	31	32	4.00452e-05	2	3	1.61446e-06	1	2	9.96983e-07	NA	1	1.38386e-06	536	537	0.000152124	15	16	3.45743e-06	NA	NA	NA	NA	NA
ISIPFFAI	ATTTCAATTCCGTTCTTCGCTATC	WT	2042	2043	0.000549056	673	674	0.000498258	3120	3121	0.000499039	NA	NA	NA	NA	NA	NA	NA	NA	NA	1348	1349	0.000286757	567	568	0.00026297	240	241	0.00030159	252	253	0.000136153	478	479	0.000238777	611	612	0.000846919	4148	4149	0.00117535	6756	6757	0.00146012	NA	NA	NA	NA	NA
ISISYGSC	ATCTCCATCTCCTACGGGTCCTGC	WT	424	425	0.000114219	137	138	0.000102017	653	654	0.000104573	NA	NA	NA	NA	NA	NA	NA	NA	NA	247	248	5.27175e-05	122	123	5.69461e-05	50	51	6.3822e-05	5	6	3.22893e-06	142	143	7.12843e-05	26	27	3.73641e-05	712	713	0.000201982	10	11	2.37698e-06	NA	NA	NA	NA	NA
ISITCLYV	ATTTCAATAACTTGCCTCTACGTT	WT	423	424	0.00011395	132	133	9.8321e-05	639	640	0.000102334	NA	NA	NA	NA	NA	NA	NA	NA	NA	210	211	4.48524e-05	110	111	5.13903e-05	45	46	5.7565e-05	14	15	8.07232e-06	23	24	1.19638e-05	4	5	6.91928e-06	748	749	0.00021218	241	242	5.22937e-05	NA	NA	NA	NA	NA
ISITFFRL	ATCTCCATCACGTTCTTTCGTTTG	WT	585	586	0.000157487	194	195	0.000144155	909	910	0.000145506	NA	NA	NA	NA	NA	NA	NA	NA	NA	356	357	7.58876e-05	157	158	7.31502e-05	72	73	9.13531e-05	4	5	2.69077e-06	29	30	1.49547e-05	30	31	4.28995e-05	1489	1490	0.000422095	115	116	2.50664e-05	NA	NA	NA	NA	NA
ISITLAVL	ATCTCTATCACGCTGGCCGTATTG	WT	607	608	0.0001634	184	185	0.000136762	1053	1054	0.000168532	NA	NA	NA	NA	NA	NA	NA	NA	NA	358	359	7.63128e-05	155	156	7.22243e-05	56	57	7.13305e-05	25	26	1.3992e-05	10	11	5.48341e-06	1	2	2.76771e-06	3	4	1.13314e-06	215	216	4.66753e-05	NA	NA	NA	NA	NA
ISIVELAL	ATAAGCATAGTCGAATTGGCATTA	WT	1150	1151	0.000309331	445	446	0.000329708	1846	1847	0.00029533	NA	NA	NA	NA	NA	NA	NA	NA	NA	667	668	0.000141997	292	293	0.000135652	116	117	0.000146415	59	60	3.22893e-05	219	220	0.000109668	30	31	4.28995e-05	209	210	5.94898e-05	2322	2323	0.000501976	NA	NA	NA	NA	NA
ISKCLSSL	ATCTCGAAGTGCTTAAGCAGCCTG	WT	149	150	4.03125e-05	45	46	3.40058e-05	222	223	3.56571e-05	NA	NA	NA	NA	NA	NA	NA	NA	NA	43	44	9.3531e-06	33	34	1.57412e-05	4	5	6.25706e-06	100	101	5.43536e-05	NA	1	4.98492e-07	23	24	3.32125e-05	10	11	3.11613e-06	2	3	6.48269e-07	NA	NA	NA	NA	NA
ISKRISFL	ATAAGCAAAAGGATTTCCTTCTTG	WT	1258	1259	0.000338356	394	395	0.000292006	1993	1994	0.000318835	NA	NA	NA	NA	NA	NA	NA	NA	NA	747	748	0.000159003	370	371	0.000171764	123	124	0.000155175	882	883	0.00047519	259	260	0.000129608	183	184	0.000254629	2885	2886	0.00081756	589	590	0.000127493	NA	NA	NA	NA	NA
ISLEMAAV	ATCTCACTCGAGATGGCTGCAGTT	WT	428	429	0.000115294	142	143	0.000105714	929	930	0.000148704	NA	NA	NA	NA	NA	NA	NA	NA	NA	275	276	5.86694e-05	102	103	4.76865e-05	64	65	8.13418e-05	2437	2438	0.00131202	25	26	1.29608e-05	38	39	5.39703e-05	705	706	0.000199999	907	908	0.000196209	NA	NA	NA	NA	NA
ISLFLSTF	ATCTCGCTCTTTCTGAGCACTTTT	WT	537	538	0.000144587	188	189	0.000139719	837	838	0.000133994	NA	NA	NA	NA	NA	NA	NA	NA	NA	282	283	6.01574e-05	190	191	8.84284e-05	55	56	7.00791e-05	141	142	7.64179e-05	983	984	0.000490516	16	17	2.35255e-05	90	91	2.57789e-05	17	18	3.88961e-06	NA	NA	NA	NA	NA
ISLFTVRL	ATCTCACTGTTCACTGTACGTTTA	WT	636	637	0.000171194	226	227	0.000167811	1275	1276	0.000204029	NA	NA	NA	NA	NA	NA	NA	NA	NA	427	428	9.09801e-05	200	201	9.30582e-05	70	71	8.88503e-05	917	918	0.000494026	129	130	6.48039e-05	42	43	5.95058e-05	1007	1008	0.000285551	1537	1538	0.000332346	NA	NA	NA	NA	NA
ISLFYGLL	ATCTCCCTGTTTTATGGGCTTCTA	WT	643	644	0.000173075	232	233	0.000172247	1150	1151	0.000184042	NA	NA	NA	NA	NA	NA	NA	NA	NA	488	489	0.000103947	190	191	8.84284e-05	89	90	0.000112627	178	179	9.63296e-05	204	205	0.000102191	13	14	1.9374e-05	12	13	3.6827e-06	2714	2715	0.000586683	NA	NA	NA	NA	NA
ISLFYSAF	ATTTCGCTGTTCTACTCGGCATTT	WT	1001	1002	0.000269287	332	333	0.000246172	1700	1701	0.000271985	NA	NA	NA	NA	NA	NA	NA	NA	NA	602	603	0.00012818	286	287	0.000132874	125	126	0.000157678	57	58	3.1213e-05	116	117	5.83235e-05	1724	1725	0.00238715	497	498	0.000141076	2104	2105	0.000454868	NA	NA	NA	NA	NA
ISLIFCLA	ATTAGTTTAATTTTCTGTCTAGCT	WT	938	939	0.000252356	295	296	0.00021882	1412	1413	0.000225935	NA	NA	NA	NA	NA	NA	NA	NA	NA	506	507	0.000107773	248	249	0.000115281	103	104	0.000130147	293	294	0.000158217	584	585	0.000291618	364	365	0.000505107	375	376	0.000106515	331	332	7.17417e-05	NA	NA	NA	NA	NA
ISLILSDV	ATATCACTGATCTTATCAGATGTC	WT	561	562	0.000151037	191	192	0.000141937	881	882	0.000141029	NA	NA	NA	NA	NA	NA	NA	NA	NA	338	339	7.20614e-05	139	140	6.48166e-05	64	65	8.13418e-05	303	304	0.000163599	1	2	9.96983e-07	5	6	8.30313e-06	51	52	1.47308e-05	1113	1114	0.000240724	NA	NA	NA	NA	NA
ISLISITL	ATTAGCTTGATATCTATAACTCTT	WT	825	826	0.000221987	335	336	0.00024839	1443	1444	0.000230891	NA	NA	NA	NA	NA	NA	NA	NA	NA	479	480	0.000102034	240	241	0.000111577	75	76	9.51074e-05	74	75	4.03616e-05	64	65	3.2402e-05	16	17	2.35255e-05	750	751	0.000212747	413	414	8.94611e-05	NA	NA	NA	NA	NA
ISLKFKAM	ATTAGTTTGAAATTTAAGGCCATG	WT	241	242	6.50375e-05	82	83	6.13582e-05	429	430	6.87558e-05	NA	NA	NA	NA	NA	NA	NA	NA	NA	123	124	2.63587e-05	78	79	3.65751e-05	31	32	4.00452e-05	51	52	2.7984e-05	9	10	4.98492e-06	NA	1	1.38386e-06	3	4	1.13314e-06	136	137	2.96043e-05	NA	NA	NA	NA	NA
ISLKRVAV	ATATCTCTAAAGAGGGTAGCCGTA	WT	336	337	9.05687e-05	126	127	9.38855e-05	567	568	9.08216e-05	NA	NA	NA	NA	NA	NA	NA	NA	NA	248	249	5.293e-05	97	98	4.53717e-05	42	43	5.38107e-05	22	23	1.23775e-05	42	43	2.14351e-05	NA	1	1.38386e-06	56	57	1.61472e-05	188	189	4.08409e-05	NA	NA	NA	NA	NA
ISLLKQNL	ATCTCCCTACTTAAGCAAAATCTC	WT	420	421	0.000113144	191	192	0.000141937	691	692	0.000110649	NA	NA	NA	NA	NA	NA	NA	NA	NA	311	312	6.6322e-05	118	119	5.50941e-05	63	64	8.00904e-05	16	17	9.14862e-06	102	103	5.13446e-05	1	2	2.76771e-06	392	393	0.000111331	83	84	1.81515e-05	NA	NA	NA	NA	NA
ISLLLPQV	ATAAGCCTCCTTCTGCCGCAGGTG	WT	83	84	2.2575e-05	33	34	2.51347e-05	133	134	2.14262e-05	NA	NA	NA	NA	NA	NA	NA	NA	NA	15	16	3.40113e-06	16	17	7.87059e-06	5	6	7.50848e-06	19	20	1.07631e-05	NA	1	4.98492e-07	NA	1	1.38386e-06	NA	1	2.83285e-07	25	26	5.61833e-06	NA	NA	NA	NA	NA
ISLLSSAV	ATTAGCCTGCTCTCCTCGGCCGTC	WT	181	182	4.89125e-05	37	38	2.80917e-05	308	309	4.94082e-05	NA	NA	NA	NA	NA	NA	NA	NA	NA	102	103	2.18948e-05	50	51	2.36118e-05	14	15	1.87712e-05	64	65	3.498e-05	161	162	8.07556e-05	NA	1	1.38386e-06	NA	1	2.83285e-07	106	107	2.31216e-05	NA	NA	NA	NA	NA
ISLLWSCI	ATATCTCTCCTCTGGAGTTGCATT	WT	809	810	0.000217687	245	246	0.000181857	1182	1183	0.000189158	NA	NA	NA	NA	NA	NA	NA	NA	NA	421	422	8.97047e-05	164	165	7.6391e-05	76	77	9.63588e-05	92	93	5.00484e-05	209	210	0.000104683	223	224	0.000309984	141	142	4.02265e-05	585	586	0.000126628	NA	NA	NA	NA	NA
ISLMSCFL	ATATCCCTCATGAGTTGCTTCTTG	WT	120	121	3.25187e-05	53	54	3.99198e-05	178	179	2.86216e-05	NA	NA	NA	NA	NA	NA	NA	NA	NA	79	80	1.70056e-05	38	39	1.80561e-05	11	12	1.5017e-05	33	34	1.82972e-05	1	2	9.96983e-07	NA	1	1.38386e-06	8	9	2.54956e-06	1	2	4.32179e-07	NA	NA	NA	NA	NA
ISLPFFIM	ATTTCGCTTCCCTTCTTCATTATG	WT	713	714	0.000191887	296	297	0.000219559	1057	1058	0.000169171	NA	NA	NA	NA	NA	NA	NA	NA	NA	421	422	8.97047e-05	233	234	0.000108336	64	65	8.13418e-05	52	53	2.85222e-05	243	244	0.000121632	53	54	7.47282e-05	373	374	0.000105949	1487	1488	0.000321541	NA	NA	NA	NA	NA
ISLPHFLM	ATTTCCCTTCCACACTTTCTAATG	WT	893	894	0.000240262	277	278	0.000205513	1311	1312	0.000209785	NA	NA	NA	NA	NA	NA	NA	NA	NA	499	500	0.000106285	255	256	0.000118522	94	95	0.000118884	34	35	1.88354e-05	156	157	7.82632e-05	20	21	2.9061e-05	454	455	0.000128895	259	260	5.61833e-05	NA	NA	NA	NA	NA
ISLSFLDL	ATCAGTTTGTCCTTCCTCGATTTA	WT	447	448	0.0001204	178	179	0.000132327	838	839	0.000134154	NA	NA	NA	NA	NA	NA	NA	NA	NA	256	257	5.46306e-05	141	142	6.57426e-05	33	34	4.2548e-05	25	26	1.3992e-05	22	23	1.14653e-05	13	14	1.9374e-05	19	20	5.6657e-06	207	208	4.49466e-05	NA	NA	NA	NA	NA
ISLSHQNL	ATAAGCCTGAGCCATCAAAACTTG	WT	301	302	8.11625e-05	140	141	0.000104235	567	568	9.08216e-05	NA	NA	NA	NA	NA	NA	NA	NA	NA	206	207	4.40021e-05	93	94	4.35197e-05	30	31	3.87938e-05	10	11	5.9197e-06	53	54	2.69185e-05	NA	1	1.38386e-06	190	191	5.41074e-05	33	34	7.34704e-06	NA	NA	NA	NA	NA
ISLSVKKL	ATCTCATTATCTGTCAAGAAATTG	WT	1049	1050	0.000282187	414	415	0.000306791	1727	1728	0.000276302	NA	NA	NA	NA	NA	NA	NA	NA	NA	718	719	0.000152838	340	341	0.000157875	113	114	0.000142661	453	454	0.000244322	395	396	0.000197403	5	6	8.30313e-06	745	746	0.000211331	1749	1750	0.000378157	NA	NA	NA	NA	NA
ISLTLCFL	ATAAGCTTAACACTTTGCTTCCTT	WT	1273	1274	0.000342387	467	468	0.000345972	2009	2010	0.000321393	NA	NA	NA	NA	NA	NA	NA	NA	NA	779	780	0.000165805	431	432	0.000200006	147	148	0.000185209	590	591	0.000318049	560	561	0.000279654	25	26	3.59802e-05	405	406	0.000115014	1705	1706	0.000368649	NA	NA	NA	NA	NA
ISLVHSMI	ATTAGTCTGGTACACTCCATGATA	WT	784	785	0.000210969	289	290	0.000214384	1115	1116	0.000178445	NA	NA	NA	NA	NA	NA	NA	NA	NA	450	451	9.58692e-05	197	198	9.16693e-05	87	88	0.000110124	570	571	0.000307286	610	611	0.000304578	167	168	0.000232488	497	498	0.000141076	579	580	0.000125332	NA	NA	NA	NA	NA
ISLVISTL	ATTAGTCTCGTTATCAGTACACTT	WT	551	552	0.00014835	201	202	0.00014933	952	953	0.000152382	NA	NA	NA	NA	NA	NA	NA	NA	NA	346	347	7.37619e-05	167	168	7.778e-05	49	50	6.25706e-05	29	30	1.61446e-05	302	303	0.000151043	NA	1	1.38386e-06	181	182	5.15579e-05	81	82	1.77193e-05	NA	NA	NA	NA	NA
ISLVLAPT	ATAAGTCTCGTGCTCGCACCTACT	WT	310	311	8.35812e-05	119	120	8.87107e-05	642	643	0.000102814	NA	NA	NA	NA	NA	NA	NA	NA	NA	169	170	3.6137e-05	108	109	5.04644e-05	37	38	4.75537e-05	2	3	1.61446e-06	32	33	1.64502e-05	NA	1	1.38386e-06	37	38	1.07648e-05	665	666	0.000143916	NA	NA	NA	NA	NA
ISLYFPTL	ATATCCCTTTATTTCCCAACGCTG	WT	469	470	0.000126312	186	187	0.000138241	771	772	0.000123441	NA	NA	NA	NA	NA	NA	NA	NA	NA	310	311	6.61094e-05	123	124	5.7409e-05	41	42	5.25593e-05	672	673	0.000362178	134	135	6.72964e-05	4	5	6.91928e-06	89	90	2.54956e-05	47	48	1.03723e-05	NA	NA	NA	NA	NA
ISLYKAQI	ATATCACTATACAAAGCTCAAATC	WT	NA	1	2.6875e-07	NA	1	7.39256e-07	NA	1	1.59897e-07	NA	NA	NA	NA	NA	NA	NA	NA	NA	NA	1	2.1257e-07	NA	1	4.62976e-07	NA	1	1.25141e-06	NA	1	5.38154e-07	NA	1	4.98492e-07	NA	1	1.38386e-06	NA	1	2.83285e-07	NA	1	2.1609e-07	NA	NA	NA	NA	NA
ISLYNTSM	ATCAGCCTGTACAACACTTCCATG	WT	1498	1499	0.000402856	547	548	0.000405112	2701	2702	0.000432042	NA	NA	NA	NA	NA	NA	NA	NA	NA	860	861	0.000183023	401	402	0.000186116	149	150	0.000187712	639	640	0.000344419	285	286	0.000142569	1139	1140	0.00157759	1671	1672	0.000473652	7360	7361	0.00159063	NA	NA	NA	NA	NA
ISMAASTL	ATTAGTATGGCAGCATCGACACTC	WT	349	350	9.40625e-05	112	113	8.35359e-05	630	631	0.000100895	NA	NA	NA	NA	NA	NA	NA	NA	NA	267	268	5.69689e-05	120	121	5.60201e-05	51	52	6.50735e-05	19	20	1.07631e-05	10	11	5.48341e-06	NA	1	1.38386e-06	7	8	2.26628e-06	47	48	1.03723e-05	NA	NA	NA	NA	NA
ISMASSQL	ATTTCTATGGCCTCATCTCAGCTG	WT	116	117	3.14437e-05	42	43	3.1788e-05	145	146	2.3345e-05	NA	NA	NA	NA	NA	NA	NA	NA	NA	85	86	1.82811e-05	37	38	1.75931e-05	19	20	2.50283e-05	NA	1	5.38154e-07	8	9	4.48642e-06	NA	1	1.38386e-06	NA	1	2.83285e-07	NA	1	2.1609e-07	NA	NA	NA	NA	NA
ISMENVPM	ATCAGCATGGAGAACGTACCTATG	WT	100	101	2.71437e-05	54	55	4.06591e-05	204	205	3.27789e-05	NA	NA	NA	NA	NA	NA	NA	NA	NA	74	75	1.59428e-05	30	31	1.43523e-05	12	13	1.62684e-05	16	17	9.14862e-06	1	2	9.96983e-07	NA	1	1.38386e-06	NA	1	2.83285e-07	2	3	6.48269e-07	NA	NA	NA	NA	NA
ISMFFLNS	ATCAGCATGTTCTTCCTAAACAGC	WT	367	368	9.89e-05	124	125	9.2407e-05	590	591	9.44992e-05	NA	NA	NA	NA	NA	NA	NA	NA	NA	220	221	4.69781e-05	103	104	4.81495e-05	36	37	4.63023e-05	69	70	3.76708e-05	287	288	0.000143566	NA	1	1.38386e-06	3	4	1.13314e-06	5316	5317	0.00114895	NA	NA	NA	NA	NA
ISMGLFSI	ATTTCGATGGGGCTCTTCTCAATA	WT	352	353	9.48687e-05	172	173	0.000127891	602	603	9.6418e-05	NA	NA	NA	NA	NA	NA	NA	NA	NA	236	237	5.03792e-05	108	109	5.04644e-05	50	51	6.3822e-05	267	268	0.000144225	24	25	1.24623e-05	10	11	1.52224e-05	28	29	8.21526e-06	93	94	2.03124e-05	NA	NA	NA	NA	NA
ISMIERHL	ATCAGCATGATAGAGCGCCATCTC	WT	821	822	0.000220912	264	265	0.000195903	1442	1443	0.000230732	NA	NA	NA	NA	NA	NA	NA	NA	NA	523	524	0.000111387	268	269	0.000124541	81	82	0.000102616	326	327	0.000175976	7	8	3.98793e-06	178	179	0.00024771	922	923	0.000261472	100	101	2.1825e-05	NA	NA	NA	NA	NA
ISMTVWGL	ATAAGCATGACTGTCTGGGGTCTC	WT	344	345	9.27187e-05	111	112	8.27966e-05	590	591	9.44992e-05	NA	NA	NA	NA	NA	NA	NA	NA	NA	202	203	4.31518e-05	81	82	3.7964e-05	33	34	4.2548e-05	68	69	3.71326e-05	NA	1	4.98492e-07	NA	1	1.38386e-06	7	8	2.26628e-06	1	2	4.32179e-07	NA	NA	NA	NA	NA
ISMVIGRL	ATAAGCATGGTGATCGGACGACTC	WT	361	362	9.72875e-05	129	130	9.61032e-05	578	579	9.25804e-05	NA	NA	NA	NA	NA	NA	NA	NA	NA	194	195	4.14512e-05	126	127	5.8798e-05	40	41	5.13079e-05	9	10	5.38154e-06	1011	1012	0.000504473	933	934	0.00129252	139	140	3.96599e-05	83	84	1.81515e-05	NA	NA	NA	NA	NA
ISNQYFSF	ATTTCTAACCAATACTTCTCTTTT	WT	1044	1045	0.000280844	331	332	0.000245433	1651	1652	0.00026415	NA	NA	NA	NA	NA	NA	NA	NA	NA	671	672	0.000142847	355	356	0.000164819	114	115	0.000143912	573	574	0.000308901	651	652	0.000325017	33	34	4.70511e-05	287	288	8.15861e-05	138	139	3.00364e-05	NA	NA	NA	NA	NA
ISPMLNPL	ATTTCCCCTATGTTAAATCCACTT	WT	816	817	0.000219569	348	349	0.000258	1398	1399	0.000223696	NA	NA	NA	NA	NA	NA	NA	NA	NA	623	624	0.000132644	239	240	0.000111114	82	83	0.000103867	260	261	0.000140458	29	30	1.49547e-05	18	19	2.62932e-05	211	212	6.00564e-05	740	741	0.000160122	NA	NA	NA	NA	NA
ISPNGMSL	ATATCTCCAAATGGCATGAGTCTG	WT	217	218	5.85875e-05	62	63	4.65731e-05	404	405	6.47583e-05	NA	NA	NA	NA	NA	NA	NA	NA	NA	126	127	2.69964e-05	61	62	2.87045e-05	27	28	3.50396e-05	4	5	2.69077e-06	NA	1	4.98492e-07	1	2	2.76771e-06	21	22	6.23227e-06	2	3	6.48269e-07	NA	NA	NA	NA	NA
ISPPAPFL	ATCAGTCCTCCAGCGCCTTTTCTC	WT	573	574	0.000154262	161	162	0.000119759	811	812	0.000129836	NA	NA	NA	NA	NA	NA	NA	NA	NA	328	329	6.99357e-05	144	145	6.71315e-05	50	51	6.3822e-05	11	12	6.45785e-06	110	111	5.53326e-05	3	4	5.53542e-06	399	400	0.000113314	1748	1749	0.000377941	NA	NA	NA	NA	NA
ISPQYQPV	ATCAGCCCTCAATACCAGCCAGTC	WT	132	133	3.57437e-05	51	52	3.84413e-05	313	314	5.02077e-05	NA	NA	NA	NA	NA	NA	NA	NA	NA	92	93	1.9769e-05	60	61	2.82415e-05	19	20	2.50283e-05	36	37	1.99117e-05	535	536	0.000267191	9	10	1.38386e-05	3	4	1.13314e-06	82	83	1.79354e-05	NA	NA	NA	NA	NA
ISPVPINL	ATCAGTCCAGTCCCCATCAACCTA	WT	166	167	4.48812e-05	86	87	6.43152e-05	365	366	5.85223e-05	NA	NA	NA	NA	NA	NA	NA	NA	NA	101	102	2.16822e-05	35	36	1.66671e-05	22	23	2.87825e-05	NA	1	5.38154e-07	NA	1	4.98492e-07	53	54	7.47282e-05	4	5	1.41642e-06	2	3	6.48269e-07	NA	NA	NA	NA	NA
ISPWWYFA	ATCAGCCCATGGTGGTACTTCGCT	WT	194	195	5.24062e-05	77	78	5.76619e-05	451	452	7.22735e-05	NA	NA	NA	NA	NA	NA	NA	NA	NA	123	124	2.63587e-05	62	63	2.91675e-05	17	18	2.25254e-05	1	2	1.07631e-06	1	2	9.96983e-07	3	4	5.53542e-06	8	9	2.54956e-06	7	8	1.72872e-06	NA	NA	NA	NA	NA
ISQIILLL	ATCTCGCAAATTATCTTGCTACTC	WT	761	762	0.000204787	281	282	0.00020847	1151	1152	0.000184201	NA	NA	NA	NA	NA	NA	NA	NA	NA	483	484	0.000102884	227	228	0.000105559	80	81	0.000101364	216	217	0.000116779	198	199	9.91998e-05	117	118	0.000163295	406	407	0.000115297	1039	1040	0.000224733	NA	NA	NA	NA	NA
ISQKFGFM	ATTTCTCAGAAATTCGGTTTTATG	WT	1670	1671	0.000449081	626	627	0.000463513	2693	2694	0.000430763	NA	NA	NA	NA	NA	NA	NA	NA	NA	1119	1120	0.000238079	515	516	0.000238896	188	189	0.000236517	399	400	0.000215262	295	296	0.000147554	82	83	0.00011486	2977	2978	0.000843622	2575	2576	0.000556647	NA	NA	NA	NA	NA
ISQLKMFL	ATTTCTCAACTTAAAATGTTTCTA	WT	1153	1154	0.000310137	484	485	0.000358539	1870	1871	0.000299167	NA	NA	NA	NA	NA	NA	NA	NA	NA	804	805	0.000171119	328	329	0.000152319	107	108	0.000135153	112	113	6.08114e-05	4001	4002	0.00199496	331	332	0.00045944	1682	1683	0.000476769	269	270	5.83442e-05	NA	NA	NA	NA	NA
ISQLMFFM	ATCTCGCAGCTCATGTTCTTTATG	WT	470	471	0.000126581	161	162	0.000119759	876	877	0.00014023	NA	NA	NA	NA	NA	NA	NA	NA	NA	258	259	5.50557e-05	155	156	7.22243e-05	45	46	5.7565e-05	112	113	6.08114e-05	77	78	3.88823e-05	1	2	2.76771e-06	211	212	6.00564e-05	955	956	0.000206582	NA	NA	NA	NA	NA
ISQLVPRL	ATCTCTCAGTTAGTACCCCGACTC	WT	513	514	0.000138137	244	245	0.000181118	850	851	0.000136072	NA	NA	NA	NA	NA	NA	NA	NA	NA	393	394	8.37527e-05	157	158	7.31502e-05	70	71	8.88503e-05	29	30	1.61446e-05	196	197	9.82028e-05	162	163	0.000225568	1184	1185	0.000335693	1522	1523	0.000329104	NA	NA	NA	NA	NA
ISQMLTAM	ATTTCGCAAATGTTAACGGCAATG	WT	463	464	0.0001247	181	182	0.000134545	902	903	0.000144387	NA	NA	NA	NA	NA	NA	NA	NA	NA	289	290	6.16454e-05	159	160	7.40762e-05	48	49	6.13192e-05	80	81	4.35905e-05	10	11	5.48341e-06	93	94	0.000130082	42	43	1.21813e-05	2200	2201	0.000475613	NA	NA	NA	NA	NA
ISQRYPDI	ATCTCTCAGCGCTATCCTGACATA	WT	790	791	0.000212581	287	288	0.000212906	1469	1470	0.000235049	NA	NA	NA	NA	NA	NA	NA	NA	NA	424	425	9.03424e-05	223	224	0.000103707	78	79	9.88616e-05	59	60	3.22893e-05	252	253	0.000126118	14	15	2.07578e-05	397	398	0.000112747	44	45	9.72403e-06	NA	NA	NA	NA	NA
ISRFQSLI	ATCTCCCGCTTTCAGTCGCTCATA	WT	523	524	0.000140825	191	192	0.000141937	879	880	0.000140709	NA	NA	NA	NA	NA	NA	NA	NA	NA	362	363	7.71631e-05	177	178	8.24097e-05	55	56	7.00791e-05	128	129	6.94219e-05	109	110	5.48341e-05	NA	1	1.38386e-06	84	85	2.40792e-05	98	99	2.13929e-05	NA	NA	NA	NA	NA
ISRYTPQL	ATTTCGCGTTATACTCCGCAGCTT	WT	610	611	0.000164206	187	188	0.00013898	1078	1079	0.000172529	NA	NA	NA	NA	NA	NA	NA	NA	NA	381	382	8.12019e-05	194	195	9.02803e-05	73	74	9.26045e-05	78	79	4.25142e-05	275	276	0.000137584	21	22	3.04448e-05	224	225	6.37391e-05	389	390	8.42749e-05	NA	NA	NA	NA	NA
ISSAHQRL	ATCTCCTCCGCTCATCAACGGTTG	WT	351	352	9.46e-05	112	113	8.35359e-05	615	616	9.84966e-05	NA	NA	NA	NA	NA	NA	NA	NA	NA	190	191	4.06009e-05	96	97	4.49087e-05	35	36	4.50509e-05	18	19	1.02249e-05	11	12	5.9819e-06	NA	1	1.38386e-06	376	377	0.000106798	226	227	4.90523e-05	NA	NA	NA	NA	NA
ISSIFYTI	ATCAGTTCGATCTTTTACACAATT	WT	1481	1482	0.000398287	477	478	0.000353364	2436	2437	0.000389669	NA	NA	NA	NA	NA	NA	NA	NA	NA	933	934	0.000198541	456	457	0.00021158	146	147	0.000183958	183	184	9.90204e-05	18	19	9.47134e-06	85	86	0.000119012	185	186	5.2691e-05	747	748	0.000161635	NA	NA	NA	NA	NA
ISSNHSPL	ATTTCCAGTAACCACAGCCCTCTC	WT	483	484	0.000130075	140	141	0.000104235	730	731	0.000116885	NA	NA	NA	NA	NA	NA	NA	NA	NA	276	277	5.8882e-05	124	125	5.7872e-05	40	41	5.13079e-05	49	50	2.69077e-05	46	47	2.34291e-05	8	9	1.24547e-05	528	529	0.000149858	223	224	4.8404e-05	NA	NA	NA	NA	NA
ISSRYLRF	ATATCCTCTAGATATCTTCGGTTT	WT	1100	1101	0.000295894	366	367	0.000271307	1681	1682	0.000268947	NA	NA	NA	NA	NA	NA	NA	NA	NA	626	627	0.000133282	307	308	0.000142597	117	118	0.000147667	194	195	0.00010494	624	625	0.000311557	148	149	0.000206194	342	343	9.71667e-05	2122	2123	0.000458758	NA	NA	NA	NA	NA
ISSTFELI	ATCTCTAGCACTTTTGAACTAATC	WT	578	579	0.000155606	202	203	0.000150069	1043	1044	0.000166933	NA	NA	NA	NA	NA	NA	NA	NA	NA	366	367	7.80133e-05	178	179	8.28727e-05	63	64	8.00904e-05	34	35	1.88354e-05	129	130	6.48039e-05	39	40	5.53542e-05	147	148	4.19262e-05	38	39	8.42749e-06	NA	NA	NA	NA	NA
ISSYFVST	ATTAGTTCATACTTTGTGTCAACG	WT	1193	1194	0.000320887	442	443	0.00032749	2174	2175	0.000347776	NA	NA	NA	NA	NA	NA	NA	NA	NA	748	749	0.000159215	354	355	0.000164356	144	145	0.000181455	255	256	0.000137768	297	298	0.00014855	80	81	0.000112092	1940	1941	0.000549856	1191	1192	0.000257579	NA	NA	NA	NA	NA
ISTFLDTL	ATTTCTACTTTTCTCGACACCCTC	WT	810	811	0.000217956	293	294	0.000217341	1308	1309	0.000209305	NA	NA	NA	NA	NA	NA	NA	NA	NA	482	483	0.000102671	246	247	0.000114355	91	92	0.00011513	119	120	6.45785e-05	183	184	9.17224e-05	58	59	8.16475e-05	2034	2035	0.000576485	7719	7720	0.00166821	NA	NA	NA	NA	NA
ISVATAAM	ATATCCGTTGCCACGGCCGCGATG	WT	46	47	1.26312e-05	22	23	1.70029e-05	112	113	1.80684e-05	NA	NA	NA	NA	NA	NA	NA	NA	NA	29	30	6.37711e-06	16	17	7.87059e-06	6	7	8.75989e-06	NA	1	5.38154e-07	NA	1	4.98492e-07	NA	1	1.38386e-06	8	9	2.54956e-06	260	261	5.63994e-05	NA	NA	NA	NA	NA
ISVGSFLL	ATAAGTGTGGGTTCATTTCTCCTT	WT	1530	1531	0.000411456	516	517	0.000382195	2302	2303	0.000368243	NA	NA	NA	NA	NA	NA	NA	NA	NA	880	881	0.000187275	401	402	0.000186116	157	158	0.000197723	352	353	0.000189968	260	261	0.000130106	132	133	0.000184053	765	766	0.000216996	6406	6407	0.00138449	NA	NA	NA	NA	NA
ISVIYKKF	ATTAGCGTAATATATAAGAAATTT	WT	1114	1115	0.000299656	441	442	0.000326751	1920	1921	0.000307162	NA	NA	NA	NA	NA	NA	NA	NA	NA	720	721	0.000153263	332	333	0.000154171	113	114	0.000142661	591	592	0.000318587	25	26	1.29608e-05	378	379	0.000524481	389	390	0.000110481	815	816	0.000176329	NA	NA	NA	NA	NA
ISVKLTSV	ATCTCCGTGAAGCTCACTTCTGTC	WT	242	243	6.53062e-05	97	98	7.24471e-05	460	461	7.37126e-05	NA	NA	NA	NA	NA	NA	NA	NA	NA	186	187	3.97507e-05	66	67	3.10194e-05	23	24	3.00339e-05	9	10	5.38154e-06	1	2	9.96983e-07	25	26	3.59802e-05	4	5	1.41642e-06	158	159	3.43582e-05	NA	NA	NA	NA	NA
ISVLFLLA	ATTTCCGTGCTCTTTCTTTTGGCT	WT	557	558	0.000149962	199	200	0.000147851	848	849	0.000135753	NA	NA	NA	NA	NA	NA	NA	NA	NA	311	312	6.6322e-05	161	162	7.50021e-05	71	72	9.01017e-05	70	71	3.8209e-05	391	392	0.000195409	3	4	5.53542e-06	267	268	7.59204e-05	122	123	2.6579e-05	NA	NA	NA	NA	NA
ISVLVSAL	ATCTCGGTGCTAGTATCGGCACTT	WT	563	564	0.000151575	210	211	0.000155983	958	959	0.000153341	NA	NA	NA	NA	NA	NA	NA	NA	NA	325	326	6.92979e-05	170	171	7.91689e-05	75	76	9.51074e-05	414	415	0.000223334	108	109	5.43356e-05	1	2	2.76771e-06	414	415	0.000117563	2015	2016	0.000435636	NA	NA	NA	NA	NA
ISVQFNQL	ATCAGCGTGCAGTTCAATCAGCTC	WT	326	327	8.78812e-05	189	190	0.000140459	916	917	0.000146626	NA	NA	NA	NA	NA	NA	NA	NA	NA	285	286	6.07951e-05	117	118	5.46312e-05	46	47	5.88164e-05	17	18	9.68678e-06	2	3	1.49547e-06	13	14	1.9374e-05	45	46	1.30311e-05	50	51	1.10206e-05	NA	NA	NA	NA	NA
ISWCLLLL	ATTTCGTGGTGTTTGCTGTTATTG	WT	594	595	0.000159906	242	243	0.000179639	1087	1088	0.000173968	NA	NA	NA	NA	NA	NA	NA	NA	NA	393	394	8.37527e-05	183	184	8.51876e-05	70	71	8.88503e-05	445	446	0.000240017	17	18	8.97285e-06	3	4	5.53542e-06	96	97	2.74786e-05	52	53	1.14527e-05	NA	NA	NA	NA	NA
ISWILVLV	ATCTCATGGATTCTGGTGCTAGTA	WT	315	316	8.4925e-05	112	113	8.35359e-05	555	556	8.89028e-05	NA	NA	NA	NA	NA	NA	NA	NA	NA	184	185	3.93255e-05	81	82	3.7964e-05	34	35	4.37994e-05	200	201	0.000108169	7	8	3.98793e-06	NA	1	1.38386e-06	33	34	9.63169e-06	487	488	0.000105452	NA	NA	NA	NA	NA
ISWIQNTM	ATCTCGTGGATTCAAAATACCATG	WT	369	370	9.94375e-05	142	143	0.000105714	627	628	0.000100415	NA	NA	NA	NA	NA	NA	NA	NA	NA	279	280	5.95197e-05	92	93	4.30568e-05	33	34	4.2548e-05	19	20	1.07631e-05	2316	2317	0.001155	36	37	5.12026e-05	31	32	9.06512e-06	282	283	6.11533e-05	NA	NA	NA	NA	NA
ISWLKDGL	ATTAGCTGGCTGAAAGACGGTCTC	WT	389	390	0.000104812	95	96	7.09685e-05	777	778	0.0001244	NA	NA	NA	NA	NA	NA	NA	NA	NA	288	289	6.14328e-05	96	97	4.49087e-05	37	38	4.75537e-05	2544	2545	0.0013696	7	8	3.98793e-06	6	7	9.68699e-06	105	106	3.00282e-05	45	46	9.94012e-06	NA	NA	NA	NA	NA
ISWLPYSI	ATAAGCTGGCTCCCTTACTCCATT	WT	484	485	0.000130344	176	177	0.000130848	985	986	0.000157659	NA	NA	NA	NA	NA	NA	NA	NA	NA	330	331	7.03608e-05	163	164	7.59281e-05	70	71	8.88503e-05	220	221	0.000118932	66	67	3.33989e-05	3	4	5.53542e-06	31	32	9.06512e-06	31	32	6.91486e-06	NA	NA	NA	NA	NA
ISWTIGFI	ATTTCTTGGACGATTGGTTTTATC	WT	842	843	0.000226556	254	255	0.00018851	1263	1264	0.00020211	NA	NA	NA	NA	NA	NA	NA	NA	NA	422	423	8.99173e-05	211	212	9.81509e-05	82	83	0.000103867	130	131	7.04982e-05	7	8	3.98793e-06	81	82	0.000113476	171	172	4.8725e-05	417	418	9.03254e-05	NA	NA	NA	NA	NA
ISWVYFRK	ATCTCGTGGGTATACTTTCGAAAA	WT	133	134	3.60125e-05	73	74	5.47049e-05	211	212	3.38982e-05	NA	NA	NA	NA	NA	NA	NA	NA	NA	95	96	2.04068e-05	21	22	1.01855e-05	20	21	2.62797e-05	12	13	6.99601e-06	1	2	9.96983e-07	1	2	2.76771e-06	1	2	5.6657e-07	291	292	6.30981e-05	NA	NA	NA	NA	NA
ISYAFILA	ATTAGCTATGCATTTATCTTAGCT	WT	1869	1870	0.000502562	710	711	0.000525611	3143	3144	0.000502716	NA	NA	NA	NA	NA	NA	NA	NA	NA	1178	1179	0.00025062	550	551	0.0002551	212	213	0.000266551	3459	3460	0.00186201	148	149	7.42752e-05	101	102	0.000141153	1232	1233	0.00034929	1859	1860	0.000401926	NA	NA	NA	NA	NA
ISYALFAP	ATATCATACGCTCTCTTTGCTCCA	WT	2042	2043	0.000549056	748	749	0.000553702	3480	3481	0.000556602	NA	NA	NA	NA	NA	NA	NA	NA	NA	1264	1265	0.000268902	621	622	0.000287971	220	221	0.000276562	608	609	0.000327736	3315	3316	0.001653	19	20	2.76771e-05	1686	1687	0.000477902	1998	1999	0.000431963	NA	NA	NA	NA	NA
ISYAMNFT	ATATCATATGCGATGAACTTCACT	WT	477	478	0.000128462	165	166	0.000122716	930	931	0.000148864	NA	NA	NA	NA	NA	NA	NA	NA	NA	307	308	6.54717e-05	156	157	7.26872e-05	63	64	8.00904e-05	107	108	5.81207e-05	225	226	0.000112659	71	72	9.96376e-05	14	15	4.24927e-06	15	16	3.45743e-06	NA	NA	NA	NA	NA
ISYEDHKL	ATTAGCTACGAGGATCATAAACTA	WT	268	269	7.22937e-05	81	82	6.0619e-05	418	419	6.69969e-05	NA	NA	NA	NA	NA	NA	NA	NA	NA	142	143	3.03976e-05	50	51	2.36118e-05	30	31	3.87938e-05	1225	1226	0.000659777	19	20	9.96983e-06	147	148	0.000204811	791	792	0.000224362	115	116	2.50664e-05	NA	NA	NA	NA	NA
ISYEQCML	ATTAGCTATGAGCAGTGCATGCTC	WT	293	294	7.90125e-05	119	120	8.87107e-05	445	446	7.13141e-05	NA	NA	NA	NA	NA	NA	NA	NA	NA	229	230	4.88912e-05	75	76	3.51862e-05	21	22	2.75311e-05	3	4	2.15262e-06	NA	1	4.98492e-07	NA	1	1.38386e-06	1146	1147	0.000324928	2	3	6.48269e-07	NA	NA	NA	NA	NA
ISYFCILF	ATCTCATACTTCTGCATACTCTTC	WT	859	860	0.000231125	307	308	0.000227691	1251	1252	0.000200191	NA	NA	NA	NA	NA	NA	NA	NA	NA	444	445	9.45938e-05	255	256	0.000118522	85	86	0.000107621	221	222	0.00011947	95	96	4.78552e-05	610	611	0.000845535	635	636	0.000180169	473	474	0.000102426	NA	NA	NA	NA	NA
ISYFEIFL	ATTTCCTACTTTGAGATATTCCTG	WT	1202	1203	0.000323306	404	405	0.000299399	1814	1815	0.000290213	NA	NA	NA	NA	NA	NA	NA	NA	NA	787	788	0.000167505	386	387	0.000179172	130	131	0.000163935	352	353	0.000189968	317	318	0.00015852	58	59	8.16475e-05	698	699	0.000198016	556	557	0.000120362	NA	NA	NA	NA	NA
ISYFFILL	ATCTCCTATTTCTTTATATTACTA	WT	1350	1351	0.000363081	448	449	0.000331926	1822	1823	0.000291492	NA	NA	NA	NA	NA	NA	NA	NA	NA	846	847	0.000180047	325	326	0.00015093	113	114	0.000142661	387	388	0.000208804	30	31	1.54532e-05	51	52	7.19605e-05	7670	7671	0.00217308	479	480	0.000103723	NA	NA	NA	NA	NA
ISYIVVLV	ATTTCTTATATTGTGGTACTGGTC	WT	1475	1476	0.000396675	552	553	0.000408808	2149	2150	0.000343779	NA	NA	NA	NA	NA	NA	NA	NA	NA	919	920	0.000195565	388	389	0.000180098	154	155	0.000193969	95	96	5.16628e-05	703	704	0.000350938	192	193	0.000267084	37	38	1.07648e-05	4955	4956	0.00107094	NA	NA	NA	NA	NA
ISYLGFFI	ATCTCATATCTGGGGTTCTTTATC	WT	959	960	0.000258	388	389	0.00028757	1519	1520	0.000243044	NA	NA	NA	NA	NA	NA	NA	NA	NA	630	631	0.000134132	291	292	0.000135189	113	114	0.000142661	26	27	1.45302e-05	30	31	1.54532e-05	23	24	3.32125e-05	115	116	3.28611e-05	434	435	9.39989e-05	NA	NA	NA	NA	NA
ISYLRCVV	ATAAGTTACCTTCGGTGTGTTGTC	WT	714	715	0.000192156	260	261	0.000192946	967	968	0.00015478	NA	NA	NA	NA	NA	NA	NA	NA	NA	361	362	7.69505e-05	185	186	8.61135e-05	80	81	0.000101364	31	32	1.72209e-05	15	16	7.97587e-06	2	3	4.15157e-06	1016	1017	0.000288101	216	217	4.68914e-05	NA	NA	NA	NA	NA
ISYRKFTS	ATTAGTTATCGGAAGTTTACCAGT	WT	323	324	8.7075e-05	126	127	9.38855e-05	553	554	8.8583e-05	NA	NA	NA	NA	NA	NA	NA	NA	NA	236	237	5.03792e-05	96	97	4.49087e-05	25	26	3.25367e-05	70	71	3.8209e-05	177	178	8.87315e-05	11	12	1.66063e-05	44	45	1.27478e-05	23	24	5.18615e-06	NA	NA	NA	NA	NA
ISYTYIIS	ATCAGCTACACCTATATAATTTCT	WT	382	383	0.000102931	121	122	9.01892e-05	580	581	9.29002e-05	NA	NA	NA	NA	NA	NA	NA	NA	NA	202	203	4.31518e-05	93	94	4.35197e-05	32	33	4.12966e-05	96	97	5.2201e-05	323	324	0.000161511	3	4	5.53542e-06	441	442	0.000125212	360	361	7.80083e-05	NA	NA	NA	NA	NA
ITAAIALL	ATAACAGCAGCAATAGCATTGCTC	WT	324	325	8.73437e-05	97	98	7.24471e-05	482	483	7.72303e-05	NA	NA	NA	NA	NA	NA	NA	NA	NA	214	215	4.57026e-05	76	77	3.56492e-05	24	25	3.12853e-05	41	42	2.26025e-05	93	94	4.68582e-05	1	2	2.76771e-06	2	3	8.49855e-07	110	111	2.39859e-05	NA	NA	NA	NA	NA
[truncated: 8,667 more rows]
[truncated: 40 more columns]
