# Supplementary material for: Rejection of immunogenic tumor clones is limited by clonal fraction
Source: eLife. 2018 Nov 30;7:e41090. doi: 10.7554/eLife.41090 (PMC6269121; doi:10.7554/eLife.41090)
Supplement: Figure 4—source data 1. [file elife-41090-fig4-data1.xlsx]

## Sheet: RS32_counts_and_frequencies
peptide	DNA	pool	Pool_13_PreTumor_1	Pool_13_PreTumor_1_pseudocount	Pool_13_PreTumor_1_freq	Pool_13_Tumor_2	Pool_13_Tumor_2_pseudocount	Pool_13_Tumor_2_freq	Pool_13_Tumor_3	Pool_13_Tumor_3_pseudocount	Pool_13_Tumor_3_freq	Pool_13_Tumor_4	Pool_13_Tumor_4_pseudocount	Pool_13_Tumor_4_freq	Pool_13_Tumor_5	Pool_13_Tumor_5_pseudocount	Pool_13_Tumor_5_freq	Pool_13_Tumor_5_rank	Pool_13_PreTumor_2	Pool_13_PreTumor_2_pseudocount	Pool_13_PreTumor_2_freq	Pool_13_PreTumor_3	Pool_13_PreTumor_3_pseudocount	Pool_13_PreTumor_3_freq	Pool_13_TumorVax_1	Pool_13_TumorVax_1_pseudocount	Pool_13_TumorVax_1_freq	Pool_13_TumorVax_2	Pool_13_TumorVax_2_pseudocount	Pool_13_TumorVax_2_freq	Pool_13_TumorVax_3	Pool_13_TumorVax_3_pseudocount	Pool_13_TumorVax_3_freq	Pool_13_TumorVax_5	Pool_13_TumorVax_5_pseudocount	Pool_13_TumorVax_5_freq	Pool_13_Tumor_1	Pool_13_Tumor_1_pseudocount	Pool_13_Tumor_1_freq
AAEEFAFL	GCCGCGGAGGAATTCGCCTTCCTC	Pool 13	6164	6165	0.000151511	40	41	8.22913e-07	5987	5988	0.000132766	549	550	1.09491e-05	9586	9587	0.000244205	3902	3404	3405	0.000119857	6891	6892	0.000163642	7060	7061	0.000164567	113	114	3.19501e-06	9482	9483	0.000206088	5684	5685	0.00013254	2362	2363	6.21064e-05
AAEFHPGL	GCAGCTGAGTTTCACCCTGGGCTT	Pool 13	7823	7824	0.000192282	3394	3395	6.81412e-05	1093	1094	2.42561e-05	5233	5234	0.000104195	3142	3143	8.00601e-05	2530	4676	4677	0.000164632	7080	7081	0.00016813	1226	1227	2.85971e-05	41	42	1.17711e-06	6478	6479	0.000140804	710	711	1.65762e-05	1248	1249	3.28273e-05
AAELYLNL	GCGGCCGAGTTGTACCTTAATCTC	Pool 13	27660	27661	0.000679796	10495	10496	0.000210666	27969	27970	0.000620149	9784	9785	0.000194794	8543	8544	0.000217637	3764	18259	18260	0.000642758	30372	30373	0.000721171	11160	11161	0.000260124	11165	11166	0.000312942	56401	56402	0.00122575	9194	9195	0.000214372	20776	20777	0.000546079
AAEYLAML	GCTGCAGAATACTTGGCGATGCTA	Pool 13	2952	2953	7.25728e-05	25	26	5.21847e-07	169	170	3.76923e-06	1022	1023	2.03653e-05	424	425	1.08258e-05	874	1788	1789	6.29734e-05	2822	2823	6.70288e-05	785	786	1.83189e-05	1177	1178	3.30151e-05	14	15	3.25985e-07	5	6	1.39884e-07	3095	3096	8.13717e-05
AAFALFSL	GCCGCATTTGCATTGTTCTCTCTT	Pool 13	10997	10998	0.000270286	7291	7292	0.000146358	24986	24987	0.00055401	5479	5480	0.000109093	13470	13471	0.00034314	4261.5	8722	8723	0.000307052	13411	13412	0.000318452	45957	45958	0.00107112	62	63	1.76566e-06	32973	32974	0.000716602	3021	3022	7.04548e-05	5585	5586	0.000146816
AAFMLFCI	GCTGCCTTCATGTTATTCTGTATC	Pool 13	59749	59750	0.00146841	17296	17297	0.000347169	69076	69077	0.00153157	55229	55230	0.00109949	46335	46336	0.00118029	4914	38913	38914	0.00136978	63466	63467	0.00150695	78644	78645	0.00183294	17593	17594	0.000493096	177198	177199	0.00385095	63742	63743	0.0014861	24342	24343	0.000639803
AAFQALGL	GCGGCGTTTCAGGCGTTGGGTCTG	Pool 13	13393	13394	0.00032917	1207	1208	2.42458e-05	6756	6757	0.000149816	5708	5709	0.000113651	5736	5737	0.000146136	3251	6544	6545	0.000230386	12663	12664	0.000300692	4766	4767	0.000111102	189	190	5.32501e-06	4648	4649	0.000101034	1710	1711	3.98902e-05	5104	5105	0.000134174
AAFQGLFL	GCTGCCTTCCAGGGGCTGTTTCTT	Pool 13	3677	3678	9.03904e-05	479	480	9.63411e-06	736	737	1.63407e-05	2247	2248	4.47519e-05	567	568	1.44684e-05	1027	2192	2193	7.71943e-05	3431	3432	8.14887e-05	7	8	1.86452e-07	1485	1486	4.16472e-05	1893	1894	4.11611e-05	2234	2235	5.21067e-05	65	66	1.73467e-06
AAFTLAHI	GCGGCGTTCACACTCGCGCATATT	Pool 13	6841	6842	0.000168149	1595	1596	3.20334e-05	16610	16611	0.000368298	2167	2168	4.31593e-05	902	903	2.30017e-05	1301	4579	4580	0.000161217	7579	7580	0.000179978	3681	3682	8.58146e-05	1548	1549	4.34128e-05	8640	8641	0.000187789	573	574	1.33822e-05	2813	2814	7.39599e-05
AAFTYAII	GCGGCGTTTACCTACGCGATCATC	Pool 13	2875	2876	7.06805e-05	150	151	3.03073e-06	5628	5629	0.000124806	637	638	1.27009e-05	1004	1005	2.55999e-05	1375	2105	2106	7.41319e-05	3206	3207	7.61464e-05	2839	2840	6.61905e-05	7741	7742	0.00021698	259	260	5.65041e-06	89	90	2.09826e-06	1616	1617	4.24994e-05
AAFVVVLL	GCCGCATTTGTCGTTGTACTTCTG	Pool 13	18479	18480	0.000454164	19769	19770	0.000396805	7596	7597	0.00016844	14570	14571	0.000290071	24956	24957	0.000635717	4699	11817	11818	0.000415997	19651	19652	0.000466613	14330	14331	0.000334006	10713	10714	0.000300275	526512	526513	0.0114424	40302	40303	0.000939623	7510	7511	0.00019741
AAHGYLNL	GCCGCACATGGGTACTTAAACCTA	Pool 13	10922	10923	0.000268443	10376	10377	0.000208277	5254	5255	0.000116513	9902	9903	0.000197143	3194	3195	8.13847e-05	2544.5	6130	6131	0.000215813	12835	12836	0.000304775	2158	2159	5.03188e-05	258	259	7.25883e-06	661	662	1.43868e-05	938	939	2.18918e-05	3062	3063	8.05044e-05
AAIFKLSL	GCGGCCATATTCAAACTGAGTCTT	Pool 13	NA	1	2.4576e-08	NA	1	2.00711e-08	NA	1	2.21719e-08	NA	1	1.99074e-08	NA	1	2.54725e-08	64	NA	1	3.52003e-08	NA	1	2.37438e-08	NA	1	2.33065e-08	NA	1	2.80264e-08	NA	1	2.17323e-08	1	2	4.66279e-08	NA	1	2.62828e-08
AAKLYATV	GCTGCCAAACTGTATGCCACTGTC	Pool 13	5283	5284	0.000129859	290	291	5.84068e-06	6200	6201	0.000137488	4490	4491	8.94042e-05	4621	4622	0.000117734	2984.5	2868	2869	0.00010099	5878	5879	0.00013959	232	233	5.43042e-06	1992	1993	5.58566e-05	1176	1177	2.5579e-05	1946	1947	4.53923e-05	475	476	1.25106e-05
AALFFVSL	GCTGCGTTGTTCTTCGTATCTTTA	Pool 13	18906	18907	0.000464658	4255	4256	8.54224e-05	21289	21290	0.00047204	3505	3506	6.97954e-05	12200	12201	0.00031079	4180	14794	14795	0.000520789	21555	21556	0.000511821	5591	5592	0.00013033	18220	18221	0.000510668	20647	20648	0.000448729	24489	24490	0.000570959	24762	24763	0.000650842
AALFVLTL	GCCGCCCTGTTCGTCCTTACGCTC	Pool 13	328	329	8.08549e-06	2	3	6.02132e-08	NA	1	2.21719e-08	1	2	3.98148e-08	466	467	1.18957e-05	924	288	289	1.01729e-05	293	294	6.98068e-06	1	2	4.66131e-08	NA	1	2.80264e-08	15	16	3.47717e-07	NA	1	2.3314e-08	8	9	2.36546e-07
AALFWWNL	GCGGCGTTGTTTTGGTGGAATCTA	Pool 13	46176	46177	0.00113484	30462	30463	0.000611425	106978	106979	0.00237193	49760	49761	0.000990613	70858	70859	0.00180496	4963	29136	29137	0.00102563	49054	49055	0.00116475	18820	18821	0.000438652	22836	22837	0.000640038	17015	17016	0.000369798	23381	23382	0.000545127	25911	25912	0.000681041
AALGLALL	GCGGCTCTAGGACTAGCCCTACTA	Pool 13	15153	15154	0.000372424	2239	2240	4.49592e-05	12852	12853	0.000284976	5732	5733	0.000114129	11757	11758	0.000299506	4141	8011	8012	0.000282025	14114	14115	0.000335144	7390	7391	0.000172259	1929	1930	5.40909e-05	21549	21550	0.000468332	2563	2564	5.9777e-05	14381	14382	0.000378
AALLLASL	GCCGCACTCCTCCTCGCGTCCCTA	Pool 13	1038	1039	2.55344e-05	4	5	1.00355e-07	4728	4729	0.000104851	32	33	6.56945e-07	747	748	1.90534e-05	1173	737	738	2.59778e-05	1390	1391	3.30276e-05	NA	1	2.33065e-08	NA	1	2.80264e-08	1	2	4.34647e-08	19	20	4.66279e-07	11	12	3.15394e-07
AALLYRPV	GCAGCTCTGCTATATAGGCCCGTG	Pool 13	5915	5916	0.000145391	297	298	5.98118e-06	788	789	1.74937e-05	9078	9079	0.00018074	1376	1377	3.50756e-05	1668	3404	3405	0.000119857	6806	6807	0.000161624	1880	1881	4.38396e-05	31	32	8.96844e-07	17268	17269	0.000375296	35972	35973	0.000838673	1216	1217	3.19862e-05
AALRFSQL	GCCGCCCTCAGGTTCTCTCAACTG	Pool 13	180	181	4.44825e-06	NA	1	2.00711e-08	2	3	6.65158e-08	3	4	7.96297e-08	NA	1	2.54725e-08	64	51	52	1.83042e-06	182	183	4.34512e-06	NA	1	2.33065e-08	NA	1	2.80264e-08	NA	1	2.17323e-08	NA	1	2.3314e-08	2	3	7.88485e-08
AALSRLAL	GCCGCGCTCTCGCGTCTGGCACTC	Pool 13	2460	2461	6.04814e-05	39	40	8.02842e-07	2657	2658	5.8933e-05	138	139	2.76713e-06	467	468	1.19211e-05	925	1942	1943	6.83942e-05	2795	2796	6.63877e-05	345	346	8.06406e-06	50	51	1.42934e-06	1634	1635	3.55324e-05	14	15	3.49709e-07	46	47	1.23529e-06
AAMAFCFL	GCGGCAATGGCGTTTTGCTTTCTG	Pool 13	15278	15279	0.000375496	7365	7366	0.000147843	4381	4382	9.71574e-05	5379	5380	0.000107102	5602	5603	0.000142722	3226.5	8717	8718	0.000306876	14905	14906	0.000353925	18105	18106	0.000421988	2370	2371	6.64505e-05	5039	5040	0.000109531	1565	1566	3.65097e-05	3045	3046	8.00575e-05
AAMFSVSL	GCTGCTATGTTCTCCGTCTCTTTA	Pool 13	16126	16127	0.000396337	1370	1371	2.75174e-05	7467	7468	0.00016558	30330	30331	0.000603812	12198	12199	0.000310739	4178.5	13251	13252	0.000466475	18740	18741	0.000444983	4143	4144	9.65822e-05	3515	3516	9.85407e-05	216899	216900	0.00471374	5586	5587	0.000130255	13942	13943	0.000366462
AAMQHGPL	GCCGCTATGCAGCATGGTCCCCTA	Pool 13	3602	3603	8.85472e-05	2872	2873	5.76641e-05	2134	2135	4.73371e-05	1515	1516	3.01797e-05	2101	2102	5.35432e-05	2074.5	2156	2157	7.59271e-05	4062	4063	9.64711e-05	41671	41672	0.00097123	488	489	1.37049e-05	2416	2417	5.25271e-05	4101	4102	9.56339e-05	870	871	2.28924e-05
AAMTVMHL	GCCGCCATGACCGTTATGCACTTA	Pool 13	3975	3976	9.7714e-05	921	922	1.85055e-05	2134	2135	4.73371e-05	631	632	1.25815e-05	8033	8034	0.000204646	3694	2328	2329	8.19815e-05	4346	4347	0.000103214	2745	2746	6.39997e-05	11	12	3.36316e-07	2692	2693	5.85252e-05	620	621	1.4478e-05	491	492	1.29312e-05
AANPFFKL	GCCGCCAACCCATTCTTTAAGCTC	Pool 13	7628	7629	0.00018749	562	563	1.13e-05	704	705	1.56312e-05	3604	3605	7.17663e-05	3432	3433	8.74471e-05	2623	4217	4218	0.000148475	7624	7625	0.000181046	7335	7336	0.000170977	88	89	2.49435e-06	15823	15824	0.000343893	710	711	1.65762e-05	5937	5938	0.000156068
AAPFSAFL	GCCGCACCATTCTCTGCATTTCTA	Pool 13	15322	15323	0.000376577	7689	7690	0.000154346	26424	26425	0.000585893	10478	10479	0.00020861	4137	4138	0.000105405	2836.5	10752	10753	0.000378509	17059	17060	0.000405069	6538	6539	0.000152401	4477	4478	0.000125502	9096	9097	0.000197699	34293	34294	0.000799529	52102	52103	0.00136942
AAPWYFPI	GCGGCTCCCTGGTATTTTCCAATC	Pool 13	16352	16353	0.000401891	6095	6096	0.000122353	9671	9672	0.000214447	13399	13400	0.000266759	8989	8990	0.000228998	3821	9733	9734	0.00034264	18959	18960	0.000450183	5426	5427	0.000126485	928	929	2.60365e-05	18317	18318	0.000398093	706	707	1.6483e-05	8922	8923	0.000234522
AAQDFCQL	GCTGCGCAGGACTTCTGTCAGTTA	Pool 13	4954	4955	0.000121774	1554	1555	3.12105e-05	3485	3486	7.72913e-05	6291	6292	0.000125258	5638	5639	0.000143639	3238	3357	3358	0.000118203	5635	5636	0.00013382	36	37	8.62341e-07	93	94	2.63448e-06	407	408	8.8668e-06	1217	1218	2.83964e-05	2628	2629	6.90976e-05
AAQKYEAL	GCTGCACAGAAATATGAGGCGCTA	Pool 13	3338	3339	8.20591e-05	488	489	9.81475e-06	9745	9746	0.000216088	201	202	4.0213e-06	6924	6925	0.000176397	3508	2175	2176	7.65959e-05	4064	4065	9.65186e-05	2609	2610	6.083e-05	19	20	5.60527e-07	2152	2153	4.67897e-05	5	6	1.39884e-07	2927	2928	7.69562e-05
AAQMFFFV	GCCGCTCAGATGTTCTTCTTCGTG	Pool 13	12374	12375	0.000304128	2223	2224	4.4638e-05	4776	4777	0.000105915	7652	7653	0.000152352	4529	4530	0.00011539	2956	8195	8196	0.000288502	14369	14370	0.000341198	6790	6791	0.000158275	5137	5138	0.000143999	10123	10124	0.000220018	3544	3545	8.2648e-05	2906	2907	7.64042e-05
AARFVLSL	GCTGCCCGATTTGTACTCAGCCTA	Pool 13	12682	12683	0.000311697	6410	6411	0.000128676	6793	6794	0.000150636	27616	27617	0.000549783	3033	3034	7.72836e-05	2476.5	6982	6983	0.000245804	13060	13061	0.000310118	2370	2371	5.52598e-05	1084	1085	3.04086e-05	15355	15356	0.000333722	17228	17229	0.000401676	656	657	1.72678e-05
AARVFQSV	GCGGCTCGAGTATTTCAAAGTGTA	Pool 13	12193	12194	0.000299679	776	777	1.55952e-05	3462	3463	7.67814e-05	4936	4937	9.8283e-05	4369	4370	0.000111315	2906	6340	6341	0.000223205	10523	10524	0.00024988	2534	2535	5.9082e-05	1124	1125	3.15297e-05	11092	11093	0.000241077	48750	48751	0.00113658	6560	6561	0.000172442
AAVLSFSL	GCTGCTGTTCTGAGTTTCTCGCTC	Pool 13	44696	44697	0.00109847	9791	9792	0.000196536	39806	39807	0.000882598	15702	15703	0.000312606	31240	31241	0.000795787	4793	29104	29105	0.00102451	45454	45455	0.00107927	33936	33937	0.000790954	30530	30531	0.000855673	47733	47734	0.00103737	16808	16809	0.000391884	79586	79587	0.00209177
AAWCLHHI	GCAGCGTGGTGCTTACATCACATC	Pool 13	4569	4570	0.000112312	2788	2789	5.59782e-05	1828	1829	4.05525e-05	74	75	1.49306e-06	5307	5308	0.000135208	3143	2748	2749	9.67657e-05	4712	4713	0.000111905	670	671	1.56387e-05	271	272	7.62317e-06	628	629	1.36696e-05	13	14	3.26396e-07	5361	5362	0.000140929
AAWPFPVL	GCCGCCTGGCCTTTCCCTGTACTA	Pool 13	208	209	5.13638e-06	418	419	8.40977e-06	15	16	3.54751e-07	12	13	2.58797e-07	NA	1	2.54725e-08	64	187	188	6.61766e-06	385	386	9.16511e-06	1	2	4.66131e-08	136	137	3.83961e-06	6	7	1.52126e-07	1590	1591	3.70925e-05	2	3	7.88485e-08
AAWTVRAL	GCCGCATGGACGGTTAGGGCCCTA	Pool 13	476	477	1.17227e-05	42	43	8.63055e-07	1156	1157	2.56529e-05	1440	1441	2.86866e-05	31	32	8.1512e-07	311.5	305	306	1.07713e-05	572	573	1.36052e-05	98	99	2.30735e-06	57	58	1.62553e-06	7511	7512	0.000163253	1564	1565	3.64864e-05	82	83	2.18148e-06
AAYEFRVI	GCTGCATATGAGTTTCGGGTTATC	Pool 13	24337	24338	0.00059813	14209	14210	0.00028521	75477	75478	0.00167349	181377	181378	0.00361077	106680	106681	0.00271743	4984	16061	16062	0.000565387	24231	24232	0.00057536	63875	63876	0.00148873	1772	1773	4.96908e-05	50576	50577	0.00109916	10168	10169	0.00023708	22074	22075	0.000580194
AAYFGFSV	GCGGCCTATTTTGGATTTAGCGTG	Pool 13	5719	5720	0.000140575	86	87	1.74618e-06	20195	20196	0.000447784	3706	3707	7.37968e-05	31941	31942	0.000813643	4803	3657	3658	0.000128763	6127	6128	0.000145502	4892	4893	0.000114039	3534	3535	9.90732e-05	9161	9162	0.000199112	5472	5473	0.000127597	12531	12532	0.000329377
AAYFLAAC	GCGGCCTATTTTCTCGCAGCCTGT	Pool 13	4281	4282	0.000105234	100	101	2.02718e-06	797	798	1.76932e-05	1852	1853	3.68885e-05	597	598	1.52326e-05	1058	1670	1671	5.88197e-05	4278	4279	0.0001016	2334	2335	5.44207e-05	67008	67009	0.00187802	92	93	2.02111e-06	123	124	2.89093e-06	1280	1281	3.36683e-05
AAYLSKSL	GCAGCTTACCTAAGTAAAAGCTTG	Pool 13	5767	5768	0.000141754	177	178	3.57265e-06	1351	1352	2.99764e-05	4516	4517	8.99218e-05	3084	3085	7.85827e-05	2508	2988	2989	0.000105214	6115	6116	0.000145217	6543	6544	0.000152518	36	37	1.03698e-06	207	208	4.52033e-06	1042	1043	2.43165e-05	1827	1828	4.8045e-05
ACLNFLKL	GCTTGCCTGAACTTTCTCAAACTT	Pool 13	24779	24780	0.000608992	6603	6604	0.000132549	17388	17389	0.000385548	19277	19278	0.000383775	10995	10996	0.000280096	4061	15037	15038	0.000529342	24873	24874	0.000590603	28833	28834	0.00067202	3551	3552	9.95497e-05	24801	24802	0.000539006	17897	17898	0.000417273	8601	8602	0.000226085
ACTFFFHL	GCTTGTACATTCTTCTTTCATCTC	Pool 13	101036	101037	0.00248308	174432	174433	0.00350105	69799	69800	0.0015476	73293	73294	0.00145909	92537	92538	0.00235718	4980	83141	83142	0.00292662	112623	112624	0.00267412	81084	81085	0.00188981	17224	17225	0.000482754	245247	245248	0.00532981	9579	9580	0.000223348	44499	44500	0.00116959
ADYVFTSI	GCAGACTATGTCTTTACCAGCATC	Pool 13	8663	8664	0.000212926	2449	2450	4.91741e-05	39742	39743	0.000881179	5158	5159	0.000102702	4708	4709	0.00011995	3008	5595	5596	0.000196981	8271	8272	0.000196409	10787	10788	0.000251431	155	156	4.37211e-06	47	48	1.04315e-06	10749	10750	0.000250625	2155	2156	5.66658e-05
AEYVFADL	GCTGAATATGTGTTCGCAGATCTA	Pool 13	6275	6276	0.000154239	3572	3573	7.17139e-05	1557	1558	3.45439e-05	3630	3631	7.22839e-05	2406	2407	6.13123e-05	2220	3522	3523	0.000124011	6154	6155	0.000146143	3318	3319	7.73544e-05	966	967	2.71015e-05	25	26	5.65041e-07	707	708	1.65063e-05	2792	2793	7.3408e-05
AFAFHSYL	GCTTTTGCATTTCATAGCTATTTG	Pool 13	19121	19122	0.000469942	7354	7355	0.000147623	13671	13672	0.000303135	12016	12017	0.000239228	9381	9382	0.000238983	3883	13333	13334	0.000469361	19658	19659	0.000466779	8876	8877	0.000206892	9218	9219	0.000258375	22314	22315	0.000484957	5935	5936	0.000138392	15863	15864	0.000416951
AFAFSALF	GCATTTGCCTTCAGCGCTCTATTT	Pool 13	5064	5065	0.000124477	136	137	2.74973e-06	45	46	1.01991e-06	443	444	8.8389e-06	986	987	2.51414e-05	1363	3474	3475	0.000122321	4956	4957	0.000117698	463	464	1.08142e-05	233	234	6.55817e-06	2224	2225	4.83545e-05	111	112	2.61116e-06	3883	3884	0.000102083
AFCTFLAL	GCCTTCTGCACGTTTCTAGCTTTA	Pool 13	9755	9756	0.000239763	4687	4688	9.40931e-05	1005	1006	2.2305e-05	14925	14926	0.000297138	9240	9241	0.000235391	3860	6676	6677	0.000235032	11363	11364	0.000269825	4646	4647	0.000108305	38454	38455	0.00107775	25455	25456	0.000553218	9590	9591	0.000223604	1750	1751	4.60213e-05
AFFFAGTV	GCTTTCTTCTTTGCCGGTACGGTT	Pool 13	9615	9616	0.000236322	2030	2031	4.07643e-05	6929	6930	0.000153651	362488	362489	0.00721622	2177	2178	5.54791e-05	2111	6357	6358	0.000223804	9751	9752	0.00023155	892	893	2.08127e-05	5327	5328	0.000149324	11053	11054	0.000240229	8056	8057	0.000187841	72982	72983	0.0019182
AFFSFAPL	GCTTTCTTTAGTTTTGCACCGCTG	Pool 13	6947	6948	0.000170754	4008	4009	8.04649e-05	2015	2016	4.46986e-05	4494	4495	8.94839e-05	5310	5311	0.000135284	3145	4918	4919	0.00017315	6096	6097	0.000144766	807	808	1.88317e-05	393	394	1.10424e-05	545	546	1.18659e-05	388	389	9.06913e-06	19650	19651	0.000516484
AFFSHPFL	GCGTTCTTTTCCCACCCGTTCTTG	Pool 13	8686	8687	0.000213491	1488	1489	2.98858e-05	2067	2068	4.58515e-05	7164	7165	0.000142637	7298	7299	0.000185924	3587	6581	6582	0.000231688	9633	9634	0.000228748	32	33	7.69115e-07	12478	12479	0.000349741	21628	21629	0.000470049	72819	72820	0.00169772	3217	3218	8.45782e-05
AFFSWNRI	GCTTTCTTCTCATGGAACCGGATA	Pool 13	7948	7949	0.000195354	3422	3423	6.87032e-05	7631	7632	0.000169216	5284	5285	0.000105211	3263	3264	8.31423e-05	2565.5	5538	5539	0.000194975	8953	8954	0.000212602	7256	7257	0.000169135	983	984	2.75779e-05	7618	7619	0.000165579	1984	1985	4.62782e-05	4876	4877	0.000128181
AFFVLVPL	GCCTTCTTTGTATTAGTCCCTTTA	Pool 13	9328	9329	0.000229269	1405	1406	2.82199e-05	14118	14119	0.000313045	3044	3045	6.06181e-05	6346	6347	0.000161674	3383.5	5973	5974	0.000210287	10058	10059	0.000238839	6608	6609	0.000154033	36313	36314	0.00101775	20548	20549	0.000446578	9048	9049	0.000210968	4535	4536	0.000119219
AFGYLLPI	GCGTTTGGTTATCTCCTCCCCATA	Pool 13	26956	26957	0.000662494	5992	5993	0.000120286	27623	27624	0.000612477	147637	147638	0.00293909	16225	16226	0.000413317	4403	16626	16627	0.000585276	27321	27322	0.000648728	72886	72887	0.00169874	11209	11210	0.000314176	13157	13158	0.000285954	14538	14539	0.000338962	49260	49261	0.00129472
AFIAFANL	GCGTTCATAGCATTCGCTAACTTA	Pool 13	32680	32681	0.000803167	24025	24026	0.000482227	13016	13017	0.000288612	40226	40227	0.000800816	14097	14098	0.000359111	4299	20503	20504	0.000721747	34411	34412	0.000817072	4697	4698	0.000109494	1759	1760	4.93264e-05	38619	38620	0.000839303	24169	24170	0.000563499	23455	23456	0.00061649
AFKALAPL	GCCTTCAAGGCTCTAGCGCCCTTG	Pool 13	2047	2048	5.03316e-05	59	60	1.20426e-06	911	912	2.02208e-05	691	692	1.37759e-05	266	267	6.80116e-06	690.5	653	654	2.3021e-05	1976	1977	4.69415e-05	1	2	4.66131e-08	331	332	9.30475e-06	1910	1911	4.15305e-05	248	249	5.80518e-06	4161	4162	0.000109389
AFLFYGLL	GCATTCCTGTTTTACGGATTGCTA	Pool 13	10103	10104	0.000248316	364	365	7.32594e-06	809	810	1.79593e-05	3912	3913	7.78978e-05	1879	1880	4.78883e-05	1965	6219	6220	0.000218946	9996	9997	0.000237367	13924	13925	0.000324543	430	431	1.20794e-05	27838	27839	0.000605007	5443	5444	0.000126921	4676	4677	0.000122925
AFLYLALM	GCATTCTTGTATCTTGCGTTAATG	Pool 13	63634	63635	0.00156389	30050	30051	0.000603155	54240	54241	0.00120263	75314	75315	0.00149933	34809	34810	0.000886698	4834	45868	45869	0.0016146	70769	70770	0.00168035	37247	37248	0.000868121	78437	78438	0.00219833	62018	62019	0.00134782	23662	23663	0.000551678	32161	32162	0.000845309
AFQFWIHL	GCGTTCCAATTTTGGATCCATTTG	Pool 13	10884	10885	0.000267509	2823	2824	5.66807e-05	13386	13387	0.000296816	8882	8883	0.000176838	17225	17226	0.000438789	4457	6607	6608	0.000232604	11111	11112	0.000263841	2378	2379	5.54462e-05	483	484	1.35648e-05	28865	28866	0.000627326	68948	68949	0.00160747	3001	3002	7.89011e-05
AFQMFLAL	GCGTTTCAGATGTTTCTAGCCCTG	Pool 13	8995	8996	0.000221085	1116	1117	2.24194e-05	20455	20456	0.000453549	7222	7223	0.000143791	1873	1874	4.77355e-05	1961	6011	6012	0.000211624	9155	9156	0.000217398	3986	3987	9.29231e-05	655	656	1.83853e-05	348	349	7.58459e-06	3355	3356	7.82417e-05	2416	2417	6.35256e-05
AFRFLSPL	GCATTCAGGTTCCTGTCCCCGTTA	Pool 13	4744	4745	0.000116613	5373	5374	0.000107862	109	110	2.43891e-06	3263	3264	6.49778e-05	2434	2435	6.20256e-05	2232	3095	3096	0.00010898	5391	5392	0.000128027	1835	1836	4.27908e-05	173	174	4.87659e-06	11	12	2.60788e-07	13	14	3.26396e-07	734	735	1.93179e-05
AFRHHSYL	GCCTTCCGGCATCACTCTTACTTA	Pool 13	12565	12566	0.000308822	10110	10111	0.000202938	6677	6678	0.000148064	9387	9388	0.000186891	8449	8450	0.000215243	3754	8802	8803	0.000309868	14123	14124	0.000335357	13131	13132	0.000306061	1948	1949	5.46234e-05	21785	21786	0.000473461	5148	5149	0.000120044	7294	7295	0.000191733
AFRHSSSL	GCTTTTAGGCACTCGTCCAGTCTG	Pool 13	3887	3888	9.55513e-05	2034	2035	4.08446e-05	177	178	3.9466e-06	2079	2080	4.14074e-05	427	428	1.09022e-05	879.5	2336	2337	8.22631e-05	3703	3704	8.7947e-05	174	175	4.07864e-06	1618	1619	4.53747e-05	493	494	1.07358e-05	19	20	4.66279e-07	1698	1699	4.46546e-05
AFSQHSNL	GCGTTCTCACAGCACAGTAACCTC	Pool 13	8344	8345	0.000205086	4387	4388	8.80718e-05	2995	2996	6.64271e-05	1896	1897	3.77644e-05	4449	4450	0.000113353	2930	5020	5021	0.000176741	9806	9807	0.000232855	2563	2564	5.97579e-05	1378	1379	3.86484e-05	28706	28707	0.00062387	3822	3823	8.91293e-05	2285	2286	6.00826e-05
AFSQYSVL	GCTTTCTCTCAATATTCAGTGTTG	Pool 13	19219	19220	0.00047235	12221	12222	0.000245308	21982	21983	0.000487405	8780	8781	0.000174807	24770	24771	0.00063098	4690	12376	12377	0.000435674	19738	19739	0.000468679	10514	10515	0.000245068	4466	4467	0.000125194	5173	5174	0.000112443	21209	21210	0.000494489	24648	24649	0.000647846
AFTNYSTL	GCCTTCACCAATTACTCAACACTC	Pool 13	12068	12069	0.000296607	1138	1139	2.28609e-05	5608	5609	0.000124362	4053	4054	8.07047e-05	12633	12634	0.00032182	4203	7354	7355	0.000258898	12369	12370	0.000293711	12376	12377	0.000288465	6670	6671	0.000186964	40057	40058	0.000870554	22255	22256	0.000518876	4111	4112	0.000108075
AFTWQSQL	GCTTTCACGTGGCAGTCTCAGCTC	Pool 13	6333	6334	0.000155664	174835	174836	0.00350914	6783	6784	0.000150414	5439	5440	0.000108296	22838	22839	0.000581767	4642	2844	2845	0.000100145	6044	6045	0.000143531	1380	1381	3.21863e-05	2771	2772	7.76891e-05	454	455	9.88822e-06	8509	8510	0.000198402	3352	3353	8.81264e-05
AFTYLSAL	GCGTTTACATATCTCAGTGCACTA	Pool 13	18386	18387	0.000451878	9783	9784	0.000196375	15814	15815	0.000350649	11818	11819	0.000235286	17951	17952	0.000457282	4482	12216	12217	0.000430042	19004	19005	0.000451251	14813	14814	0.000345263	2130	2131	5.97242e-05	25628	25629	0.000556978	13388	13389	0.000312151	19288	19289	0.00050697
AFTYPASL	GCCTTTACGTATCCAGCATCTCTC	Pool 13	10530	10531	0.000258809	6445	6446	0.000129378	8525	8526	0.000189038	5069	5070	0.000100931	3817	3818	9.7254e-05	2743.5	7015	7016	0.000246965	10966	10967	0.000260398	1020	1021	2.3796e-05	4184	4185	0.00011729	22889	22890	0.000497453	7273	7274	0.000169586	2613	2614	6.87034e-05
AFVHFLGI	GCTTTTGTACACTTTCTTGGTATC	Pool 13	35556	35557	0.000873848	4015	4016	8.06054e-05	38106	38107	0.000844906	19264	19265	0.000383517	27028	27029	0.000688496	4726	25869	25870	0.000910632	37817	37818	0.000897943	18375	18376	0.000428281	2366	2367	6.63384e-05	65844	65845	0.00143097	21650	21651	0.000504771	27924	27925	0.000733948
AFVYLSKL	GCTTTCGTTTATCTCTCTAAGTTG	Pool 13	11757	11758	0.000288964	3386	3387	6.79807e-05	6716	6717	0.000148929	3761	3762	7.48917e-05	16024	16025	0.000408197	4393	8879	8880	0.000312579	11855	11856	0.000281507	2942	2943	6.85911e-05	915	916	2.56722e-05	6166	6167	0.000134023	5565	5566	0.000129766	2390	2391	6.28423e-05
AFYFSATV	GCGTTTTATTTCTCTGCAACTGTC	Pool 13	8779	8780	0.000215777	1789	1790	3.59272e-05	7540	7541	0.000167199	17112	17113	0.000340676	904	905	2.30526e-05	1302.5	5814	5815	0.00020469	8935	8936	0.000212175	22651	22652	0.000527939	397	398	1.11545e-05	16391	16392	0.000356237	11029	11030	0.000257153	8583	8584	0.000225612
AGALFVHI	GCGGGAGCCCTCTTTGTACATATT	Pool 13	19576	19577	0.000481124	22084	22085	0.000443269	20266	20267	0.000449358	25908	25909	0.000515781	15335	15336	0.000390646	4367	12883	12884	0.000453521	20952	20953	0.000497504	6948	6949	0.000161957	2264	2265	6.34797e-05	15184	15185	0.000330006	26827	26828	0.000625467	6665	6666	0.000175201
AGFALQNI	GCCGGGTTTGCCCTTCAAAACATA	Pool 13	787	788	1.93659e-05	217	218	4.37549e-06	1896	1897	4.20601e-05	307	308	6.13149e-06	651	652	1.66081e-05	1104.5	624	625	2.20002e-05	1059	1060	2.51684e-05	214	215	5.0109e-06	276	277	7.7633e-06	1	2	4.34647e-08	NA	1	2.3314e-08	488	489	1.28523e-05
AGFFRFFA	GCAGGATTCTTTCGTTTCTTTGCG	Pool 13	26077	26078	0.000640892	9697	9698	0.000194649	15436	15437	0.000342268	15386	15387	0.000306316	34315	34316	0.000874115	4831	19096	19097	0.00067222	28387	28388	0.000674039	43246	43247	0.00100794	26537	26538	0.000743764	34016	34017	0.000739269	11103	11104	0.000258878	6207	6208	0.000163164
AGFLYTIL	GCAGGTTTTCTCTACACGATCCTT	Pool 13	11391	11392	0.000279969	2175	2176	4.36746e-05	6916	6917	0.000153363	2552	2553	5.08237e-05	10353	10354	0.000263742	3997	6208	6209	0.000218559	10245	10246	0.000243279	15830	15831	0.000368966	1067	1068	2.99322e-05	15640	15641	0.000339916	11044	11045	0.000257503	3861	3862	0.000101504
AGFQFPFT	GCTGGTTTCCAGTTCCCCTTTACT	Pool 13	9632	9633	0.00023674	1242	1243	2.49483e-05	10907	10908	0.000241851	318470	318471	0.00633994	1793	1794	4.56977e-05	1910	6397	6398	0.000225212	10035	10036	0.000238293	4074	4075	9.49741e-05	115	116	3.25106e-06	3074	3075	6.6827e-05	7638	7639	0.000178095	2093	2094	5.50363e-05
AGFRALGL	GCGGGTTTCAGGGCTCTAGGTTTG	Pool 13	7306	7307	0.000179577	739	740	1.48526e-05	4547	4548	0.000100838	5895	5896	0.000117374	4311	4312	0.000109837	2886	5111	5112	0.000179944	7175	7176	0.000170386	992	993	2.31434e-05	872	873	2.4467e-05	5058	5059	0.000109944	3024	3025	7.05247e-05	5317	5318	0.000139772
AGHRFPEL	GCTGGGCATAGGTTTCCAGAATTG	Pool 13	21996	21997	0.000540597	4573	4574	9.1805e-05	48529	48530	0.001076	15700	15701	0.000312566	10247	10248	0.000261042	3990	13982	13983	0.000492206	21977	21978	0.000521841	6087	6088	0.00014189	29547	29548	0.000828123	30395	30396	0.000660576	28603	28604	0.000666873	7242	7243	0.000190367
AGHVLAAL	GCGGGGCACGTTCTTGCGGCTCTC	Pool 13	2903	2904	7.13686e-05	20	21	4.21492e-07	3167	3168	7.02407e-05	1420	1421	2.82885e-05	168	169	4.30485e-06	573	1984	1985	6.98726e-05	2837	2838	6.73849e-05	2	3	6.99196e-08	4866	4867	0.000136404	237	238	5.1723e-06	441	442	1.03048e-05	1376	1377	3.61915e-05
AGIFYFIL	GCGGGAATATTCTATTTCATTCTG	Pool 13	8824	8825	0.000216883	1458	1459	2.92837e-05	17291	17292	0.000383397	19822	19823	0.000394625	8676	8677	0.000221025	3776	6604	6605	0.000232498	10167	10168	0.000241427	5623	5624	0.000131076	262	263	7.37093e-06	26142	26143	0.000568149	14184	14185	0.000330709	2145	2146	5.6403e-05
AGLIYASI	GCTGGACTCATATATGCTTCGATC	Pool 13	11858	11859	0.000291446	4898	4899	9.83281e-05	5198	5199	0.000115272	5754	5755	0.000114567	3492	3493	8.89755e-05	2647	7334	7335	0.000258194	12955	12956	0.000307625	7318	7319	0.00017058	16343	16344	0.000458063	8633	8634	0.000187637	10292	10293	0.000239971	3288	3289	8.64443e-05
AGMTFTTF	GCAGGTATGACCTTTACCACTTTC	Pool 13	7842	7843	0.000192749	277	278	5.57975e-06	16445	16446	0.00036464	2488	2489	4.95496e-05	1518	1519	3.86927e-05	1766	4525	4526	0.000159317	6866	6867	0.000163049	3745	3746	8.73062e-05	126	127	3.55935e-06	987	988	2.14716e-05	808	809	1.8861e-05	2393	2394	6.29211e-05
AGPHFVAV	GCGGGTCCTCACTTTGTCGCGGTG	Pool 13	972	973	2.39124e-05	1	2	4.01421e-08	2	3	6.65158e-08	NA	1	1.99074e-08	NA	1	2.54725e-08	64	815	816	2.87235e-05	1073	1074	2.55008e-05	360	361	8.41366e-06	NA	1	2.80264e-08	2	3	6.5197e-08	1	2	4.66279e-08	3	4	1.05131e-07
AGRLFVSV	GCAGGTCGCTTATTTGTAAGCGTC	Pool 13	4386	4387	0.000107815	64	65	1.30462e-06	596	597	1.32366e-05	626	627	1.2482e-05	3577	3578	9.11406e-05	2671	2272	2273	8.00103e-05	4144	4145	9.84181e-05	2441	2442	5.69145e-05	62	63	1.76566e-06	10114	10115	0.000219823	73	74	1.72523e-06	1850	1851	4.86495e-05
AGRPWALL	GCGGGACGGCCTTGGGCGCTGCTC	Pool 13	292	293	7.20076e-06	NA	1	2.00711e-08	115	116	2.57194e-06	NA	1	1.99074e-08	480	481	1.22523e-05	936.5	92	93	3.27363e-06	395	396	9.40255e-06	2	3	6.99196e-08	NA	1	2.80264e-08	145	146	3.17292e-06	1	2	4.66279e-08	380	381	1.00138e-05
AGRRYLGI	GCAGGTCGTCGATATCTTGGTATA	Pool 13	12615	12616	0.00031005	4912	4913	9.86091e-05	9066	9067	0.000201033	1152	1153	2.29533e-05	5229	5230	0.000133221	3122	7732	7733	0.000272204	13962	13963	0.000331535	11761	11762	0.000274131	2558	2559	7.17195e-05	32609	32610	0.000708692	10330	10331	0.000240857	543	544	1.42979e-05
AGSLFPLL	GCTGGGTCCCTGTTCCCGCTATTA	Pool 13	850	851	2.09141e-05	3	4	8.02842e-08	6602	6603	0.000146401	3	4	7.96297e-08	482	483	1.23032e-05	941	314	315	1.10881e-05	691	692	1.64307e-05	1	2	4.66131e-08	1755	1756	4.92143e-05	4	5	1.08662e-07	2	3	6.99419e-08	240	241	6.33417e-06
AGVLLATL	GCAGGTGTGCTGCTAGCAACGCTC	Pool 13	2955	2956	7.26465e-05	11	12	2.40853e-07	17	18	3.99095e-07	2667	2668	5.3113e-05	685	686	1.74741e-05	1127	1655	1656	5.82917e-05	2880	2881	6.84059e-05	4054	4055	9.4508e-05	5	6	1.68158e-07	20	21	4.56379e-07	537	538	1.25429e-05	246	247	6.49186e-06
AGVRYLDL	GCCGGTGTCCGTTATCTTGATTTA	Pool 13	7402	7403	0.000181936	5968	5969	0.000119804	2233	2234	4.95321e-05	4401	4402	8.76325e-05	2857	2858	7.28004e-05	2412	4620	4621	0.000162661	8489	8490	0.000201585	4592	4593	0.000107047	7669	7670	0.000214962	4058	4059	8.82116e-05	3724	3725	8.68445e-05	2361	2362	6.20801e-05
AGWAQAVL	GCGGGCTGGGCGCAAGCTGTTTTG	Pool 13	1689	1690	4.15334e-05	2	3	6.02132e-08	3403	3404	7.54732e-05	783	784	1.56074e-05	328	329	8.38046e-06	773.5	1095	1096	3.85795e-05	2038	2039	4.84136e-05	4	5	1.16533e-07	4	5	1.40132e-07	NA	1	2.17323e-08	1088	1089	2.53889e-05	1782	1783	4.68623e-05
AGWQFKPM	GCAGGATGGCAGTTTAAACCAATG	Pool 13	2739	2740	6.73381e-05	2553	2554	5.12615e-05	311	312	6.91764e-06	134	135	2.6875e-06	15475	15476	0.000394213	4376	1698	1699	5.98053e-05	3227	3228	7.6645e-05	217	218	5.08082e-06	15	16	4.48422e-07	5017	5018	0.000109053	1123	1124	2.62049e-05	715	716	1.88185e-05
AGWVVGSL	GCGGGATGGGTTGTTGGGTCTTTA	Pool 13	2048	2049	5.03561e-05	534	535	1.0738e-05	230	231	5.12172e-06	3998	3999	7.96098e-05	2618	2619	6.67125e-05	2317	1048	1049	3.69251e-05	2379	2380	5.65103e-05	2076	2077	4.84077e-05	37	38	1.065e-06	2329	2330	5.06364e-05	4901	4902	0.000114285	6763	6764	0.000177777
AGYFHKAV	GCCGGGTATTTTCATAAAGCGGTC	Pool 13	17051	17052	0.000419069	16762	16763	0.000336451	6185	6186	0.000137156	30660	30661	0.000610382	9192	9193	0.000234169	3850	9709	9710	0.000341795	15483	15484	0.000367649	43143	43144	0.00100554	14814	14815	0.000415211	11011	11012	0.000239317	29101	29102	0.000678483	18311	18312	0.000481291
AGYFYNGT	GCGGGTTATTTCTATAATGGTACG	Pool 13	8238	8239	0.000202481	439	440	8.83127e-06	12376	12377	0.000274422	1647	1648	3.28074e-05	1951	1952	4.97223e-05	2004	5289	5290	0.00018621	8265	8266	0.000196266	6796	6797	0.000158414	324	325	9.10857e-06	12227	12228	0.000265743	11699	11700	0.000272773	39677	39678	0.00104285
AGYHMECL	GCCGGATATCATATGGAATGCCTG	Pool 13	3735	3736	9.18158e-05	132	133	2.66945e-06	1284	1285	2.84909e-05	3562	3563	7.09302e-05	2153	2154	5.48678e-05	2098	2477	2478	8.72264e-05	4636	4637	0.0001101	107	108	2.5171e-06	13610	13611	0.000381467	3482	3483	7.56937e-05	2429	2430	5.66529e-05	381	382	1.004e-05
AGYIPLNL	GCAGGGTACATCCCGTTAAACCTC	Pool 13	6525	6526	0.000160383	143	144	2.89023e-06	5438	5439	0.000120593	201	202	4.0213e-06	175	176	4.48316e-06	585.5	3967	3968	0.000139675	6714	6715	0.00015944	2890	2891	6.73792e-05	119	120	3.36316e-06	5889	5890	0.000128003	21233	21234	0.000495049	2135	2136	5.61402e-05
AGYPMGPF	GCAGGTTACCCAATGGGCCCTTTT	Pool 13	4181	4182	0.000102777	779	780	1.56554e-05	4091	4092	9.07275e-05	2267	2268	4.515e-05	1543	1544	3.93296e-05	1780	2744	2745	9.66249e-05	4026	4027	9.56163e-05	5446	5447	0.000126951	16	17	4.76448e-07	5339	5340	0.000116051	3584	3585	8.35806e-05	668	669	1.75832e-05
AGYRKCSV	GCTGGTTATCGTAAATGCTCCGTC	Pool 13	27692	27693	0.000680582	5336	5337	0.000107119	14280	14281	0.000316637	13209	13210	0.000262977	21985	21986	0.000560039	4617	19482	19483	0.000685808	27910	27911	0.000662713	24574	24575	0.000572758	1298	1299	3.64063e-05	35166	35167	0.000764261	8857	8858	0.000206515	11834	11835	0.000311057
AGYTYCGS	GCTGGCTATACATATTGCGGTTCG	Pool 13	29335	29336	0.00072096	5770	5771	0.00011583	5550	5551	0.000123076	56967	56968	0.00113409	15088	15089	0.000384355	4353	20604	20605	0.000725302	30585	30586	0.000726228	14721	14722	0.000343119	82200	82201	0.0023038	28448	28449	0.000618263	10573	10574	0.000246522	14166	14167	0.000372349
AHFLAKSL	GCACACTTCCTCGCCAAGAGCCTC	Pool 13	620	621	1.52617e-05	2	3	6.02132e-08	1	2	4.43439e-08	NA	1	1.99074e-08	61	62	1.5793e-06	392.5	415	416	1.46433e-05	591	592	1.40563e-05	2	3	6.99196e-08	6	7	1.96185e-07	53	54	1.17355e-06	2	3	6.99419e-08	5974	5975	0.00015704
AHITFAIL	GCCCACATTACCTTCGCTATTCTA	Pool 13	4960	4961	0.000121921	977	978	1.96295e-05	2833	2834	6.28352e-05	2223	2224	4.42741e-05	9078	9079	0.000231265	3833	3203	3204	0.000112782	5798	5799	0.00013769	9730	9731	0.000226796	18825	18826	0.000527624	7118	7119	0.000154713	701	702	1.63664e-05	993	994	2.61251e-05
AHKFFLFL	GCGCACAAATTCTTTCTCTTTCTC	Pool 13	58990	58991	0.00144976	141624	141625	0.00284256	50732	50733	0.00112485	208088	208089	0.00414252	61056	61057	0.00155528	4948	45164	45165	0.00158982	65052	65053	0.00154461	42697	42698	0.000995142	215060	215061	0.00602738	95229	95230	0.00206957	804762	804763	0.0187622	35763	35764	0.00093998
AHPLYLLL	GCTCACCCTCTGTACTTGCTACTA	Pool 13	1539	1540	3.7847e-05	2	3	6.02132e-08	663	664	1.47222e-05	2559	2560	5.0963e-05	116	117	2.98028e-06	499	545	546	1.92194e-05	1490	1491	3.5402e-05	6	7	1.63146e-07	193	194	5.43712e-06	1	2	4.34647e-08	NA	1	2.3314e-08	43	44	1.15645e-06
AIATYWAL	GCCATAGCTACCTATTGGGCTCTA	Pool 13	4319	4320	0.000106168	3925	3926	7.8799e-05	2390	2391	5.30131e-05	1096	1097	2.18384e-05	1875	1876	4.77864e-05	1962	2105	2106	7.41319e-05	3943	3944	9.36456e-05	5657	5658	0.000131868	34	35	9.80923e-07	1747	1748	3.79881e-05	81	82	1.91175e-06	255	256	6.72841e-06
AICYISYL	GCAATTTGCTATATATCATACTTA	Pool 13	8502	8503	0.000208969	20770	20771	0.000416896	21135	21136	0.000468626	12631	12632	0.000251471	2101	2102	5.35432e-05	2074.5	5811	5812	0.000204584	9515	9516	0.000225946	3510	3511	8.18292e-05	5871	5872	0.000164571	13697	13698	0.00029769	9805	9806	0.000228617	11253	11254	0.000295787
AIESFALM	GCAATTGAGTCCTTCGCATTGATG	Pool 13	16784	16785	0.000412508	5868	5869	0.000117797	18302	18303	0.000405813	732	733	1.45921e-05	9265	9266	0.000236028	3862	9539	9540	0.000335811	17196	17197	0.000408322	1432	1433	3.33983e-05	87735	87736	0.00245892	2779	2780	6.04159e-05	1627	1628	3.79551e-05	13333	13334	0.000350455
AIFFGKFL	GCGATCTTCTTTGGCAAGTTCCTT	Pool 13	2109	2110	5.18553e-05	1894	1895	3.80347e-05	1856	1857	4.11733e-05	1329	1330	2.64769e-05	1312	1313	3.34454e-05	1615	973	974	3.42851e-05	1941	1942	4.61105e-05	1358	1359	3.16736e-05	225	226	6.33396e-06	1625	1626	3.53368e-05	1003	1004	2.34072e-05	1477	1478	3.8846e-05
AIFGYLTF	GCAATATTCGGGTATCTTACATTT	Pool 13	83422	83423	0.0020502	35638	35639	0.000715312	56702	56703	0.00125721	34573	34574	0.000688279	81140	81141	0.00206686	4974	58205	58206	0.00204887	89316	89317	0.00212073	70250	70251	0.00163731	129304	129305	0.00362395	117226	117227	0.00254762	97109	97110	0.00226402	182495	182496	0.00479651
AIFLPPNL	GCCATCTTCTTGCCACCGAATCTC	Pool 13	6094	6095	0.00014979	3759	3760	7.54672e-05	18019	18020	0.000399538	8873	8874	0.000176658	4545	4546	0.000115798	2960	3895	3896	0.00013714	6925	6926	0.00016445	1062	1063	2.47748e-05	1291	1292	3.62101e-05	3166	3167	6.88263e-05	93579	93580	0.00218172	765	766	2.01327e-05
AIFLRNLM	GCTATCTTCCTGAGGAATCTCATG	Pool 13	17178	17179	0.00042219	21898	21899	0.000439536	25600	25601	0.000567624	18596	18597	0.000370218	14833	14834	0.000377859	4345	11287	11288	0.000397341	18142	18143	0.000430784	10156	10157	0.000236724	3855	3856	0.00010807	13892	13893	0.000301927	19248	19249	0.000448771	13902	13903	0.00036541
AIFQHWVL	GCGATCTTCCAGCATTGGGTACTA	Pool 13	8140	8141	0.000200073	1383	1384	2.77783e-05	1570	1571	3.48321e-05	6973	6974	0.000138834	24838	24839	0.000632712	4694	5336	5337	0.000187864	8256	8257	0.000196053	378	379	8.83317e-06	666	667	1.86936e-05	3237	3238	7.03693e-05	1485	1486	3.46446e-05	2118	2119	5.56934e-05
AIFRKFDV	GCGATTTTCCGCAAGTTTGACGTC	Pool 13	9459	9460	0.000232489	3653	3654	7.33396e-05	3823	3824	8.47855e-05	5789	5790	0.000115264	6295	6296	0.000160375	3371	5981	5982	0.000210568	9415	9416	0.000223572	1684	1685	3.92715e-05	1393	1394	3.90688e-05	2274	2275	4.94411e-05	790	791	1.84413e-05	22534	22535	0.000592284
AIFVFLHI	GCCATCTTTGTATTTCTCCATATC	Pool 13	13159	13160	0.00032342	3975	3976	7.98025e-05	8104	8105	0.000179703	5056	5057	0.000100672	14327	14328	0.00036497	4315	8632	8633	0.000303884	14396	14397	0.00034184	2880	2881	6.71461e-05	4106	4107	0.000115104	8665	8666	0.000188332	1311	1312	3.05879e-05	3870	3871	0.000101741
AIHRLLAL	GCTATTCATAGACTCCTCGCACTA	Pool 13	17487	17488	0.000429784	6546	6547	0.000131405	8731	8732	0.000193605	16736	16737	0.000333191	16333	16334	0.000416068	4407	11442	11443	0.000402797	17595	17596	0.000417796	22028	22029	0.000513419	13079	13080	0.000366585	25168	25169	0.000546981	30766	30767	0.000717301	5202	5203	0.00013675
AIIAFKTL	GCGATTATTGCATTTAAAACCCTC	Pool 13	4638	4639	0.000114008	319	320	6.42274e-06	1083	1084	2.40344e-05	4644	4645	9.247e-05	4464	4465	0.000113735	2934	2551	2552	8.98312e-05	4564	4565	0.00010839	846	847	1.97406e-05	7449	7450	0.000208796	1866	1867	4.05743e-05	1309	1310	3.05413e-05	3838	3839	0.0001009
AIKVYCNM	GCAATCAAAGTCTATTGTAACATG	Pool 13	10909	10910	0.000268124	1319	1320	2.64938e-05	4490	4491	9.95741e-05	3487	3488	6.94371e-05	24655	24656	0.00062805	4688	6622	6623	0.000233132	12312	12313	0.000292357	29080	29081	0.000677777	39117	39118	0.00109634	25426	25427	0.000552588	3936	3937	9.17871e-05	543	544	1.42979e-05
AILALSLL	GCTATACTTGCTCTCTCTCTGTTG	Pool 13	40529	40530	0.000996064	39732	39733	0.000797483	51320	51321	0.00113789	45967	45968	0.000915105	68854	68855	0.00175391	4959	26189	26190	0.000921896	40390	40391	0.000959036	21446	21447	0.000499855	21022	21023	0.000589198	144517	144518	0.00314071	49011	49012	0.00114266	27031	27032	0.000710478
AILLPAYL	GCCATATTGTTGCCCGCGTATCTA	Pool 13	5087	5088	0.000125043	6625	6626	0.000132991	3926	3927	8.70692e-05	4587	4588	9.13353e-05	2215	2216	5.64471e-05	2130	3342	3343	0.000117675	6219	6220	0.000147686	9124	9125	0.000212672	937	938	2.62887e-05	12883	12884	0.000279999	1044	1045	2.43631e-05	4545	4546	0.000119482
AILLRAFL	GCGATACTCCTTAGAGCCTTCCTT	Pool 13	16162	16163	0.000397221	5488	5489	0.00011017	13555	13556	0.000300563	11920	11921	0.000237316	9337	9338	0.000237862	3874.5	9854	9855	0.000346899	16391	16392	0.000389208	7553	7554	0.000176057	2111	2112	5.91917e-05	6680	6681	0.000145194	26726	26727	0.000623112	12263	12264	0.000322333
AILYFIPL	GCCATACTGTATTTTATACCCCTT	Pool 13	9427	9428	0.000231702	2751	2752	5.52356e-05	3749	3750	8.31447e-05	9951	9952	0.000198119	7867	7868	0.000200418	3669	6181	6182	0.000217608	10409	10410	0.000247173	2355	2356	5.49102e-05	439	440	1.23316e-05	8008	8009	0.000174054	11426	11427	0.000266409	5637	5638	0.000148183
AILYYVNL	GCGATCCTTTATTACGTAAACTTG	Pool 13	11803	11804	0.000290095	5399	5400	0.000108384	31983	31984	0.000709147	5729	5730	0.00011407	5199	5200	0.000132457	3116.5	7822	7823	0.000275372	12017	12018	0.000285353	6398	6399	0.000149138	3670	3671	0.000102885	13556	13557	0.000294625	3704	3705	8.63782e-05	3186	3187	8.37634e-05
AIPKLYSL	GCGATTCCAAAACTTTATTCGCTG	Pool 13	3382	3383	8.31405e-05	217	218	4.37549e-06	1583	1584	3.51203e-05	4048	4049	8.06052e-05	5018	5019	0.000127847	3073	2264	2265	7.97287e-05	3545	3546	8.41955e-05	270	271	6.31607e-06	1745	1746	4.8934e-05	39	40	8.69294e-07	9	10	2.3314e-07	290	291	7.64831e-06
AIRTYLNL	GCAATTCGAACCTACTTGAATTTA	Pool 13	3470	3471	8.53032e-05	490	491	9.85489e-06	1893	1894	4.19936e-05	1730	1731	3.44598e-05	3463	3464	8.82368e-05	2635.5	1990	1991	7.00838e-05	3768	3769	8.94904e-05	722	723	1.68506e-05	16	17	4.76448e-07	3917	3918	8.51473e-05	100	101	2.35471e-06	743	744	1.95544e-05
AISFFILM	GCAATATCGTTCTTCATACTAATG	Pool 13	12452	12453	0.000306044	6308	6309	0.000126628	24437	24438	0.000541838	14002	14003	0.000278764	35281	35282	0.000898721	4837	7871	7872	0.000277097	12708	12709	0.00030176	5242	5243	0.000122196	326	327	9.16462e-06	62108	62109	0.00134977	5783	5784	0.000134848	4944	4945	0.000129969
AITLFGNL	GCAATTACCTTATTTGGGAACTTA	Pool 13	5672	5673	0.000139419	872	873	1.7522e-05	1961	1962	4.35013e-05	29347	29348	0.000584243	727	728	1.8544e-05	1159	3181	3182	0.000112007	6147	6148	0.000145977	604	605	1.41004e-05	69	70	1.96185e-06	1745	1746	3.79447e-05	41	42	9.79187e-07	4703	4704	0.000123635
AIWRYLYL	GCCATTTGGCGTTACCTCTATTTG	Pool 13	1069	1070	2.62963e-05	37	38	7.627e-07	141	142	3.14841e-06	2212	2213	4.40551e-05	873	874	2.2263e-05	1282	366	367	1.29185e-05	1184	1185	2.81364e-05	531	532	1.23991e-05	14	15	4.20396e-07	3993	3994	8.6799e-05	1499	1500	3.49709e-05	418	419	1.10125e-05
AIWVLPLL	GCAATTTGGGTGTTACCGCTGCTC	Pool 13	13914	13915	0.000341975	434	435	8.73091e-06	2565	2566	5.68932e-05	13706	13707	0.000272871	5464	5465	0.000139207	3195.5	8614	8615	0.000303251	13107	13108	0.000311234	5715	5716	0.00013322	3153	3154	8.83952e-05	9745	9746	0.000211803	2329	2330	5.43215e-05	1794	1795	4.71777e-05
AIYHGIPI	GCCATATACCATGGGATCCCTATA	Pool 13	3846	3847	9.45437e-05	305	306	6.14174e-06	30617	30618	0.00067886	922	923	1.83746e-05	4028	4029	0.000102629	2810	2064	2065	7.26886e-05	3993	3994	9.48328e-05	285	286	6.66567e-06	3887	3888	0.000108967	1071	1072	2.32971e-05	140	141	3.28727e-06	781	782	2.05532e-05
AIYNMASV	GCGATTTACAATATGGCGTCAGTG	Pool 13	6169	6170	0.000151634	1023	1024	2.05528e-05	8474	8475	0.000187907	3272	3273	6.5157e-05	3984	3985	0.000101508	2797.5	3139	3140	0.000110529	6275	6276	0.000149016	258	259	6.03639e-06	735	736	2.06274e-05	8395	8396	0.000182465	116	117	2.72773e-06	2599	2600	6.83354e-05
AIYYFKIA	GCCATTTACTATTTTAAGATAGCT	Pool 13	11938	11939	0.000293412	48253	48254	0.000968509	16352	16353	0.000362578	33183	33184	0.000660608	7018	7019	0.000178792	3534	7398	7399	0.000260447	12632	12633	0.000299955	2726	2727	6.35569e-05	5683	5684	0.000159302	14594	14595	0.000317184	12475	12476	0.000290865	4752	4753	0.000124922
AKYIFLSL	GCTAAATATATCTTCTTGTCACTG	Pool 13	11518	11519	0.000283091	1426	1427	2.86414e-05	28292	28293	0.00062731	9427	9428	0.000187687	10409	10410	0.000265169	4003	8465	8466	0.000298006	13078	13079	0.000310545	38926	38927	0.000907253	10590	10591	0.000296827	131053	131054	0.00284811	55842	55843	0.00130192	13662	13663	0.000359103
ALFAMAKL	GCGTTATTTGCGATGGCTAAGCTA	Pool 13	15380	15381	0.000378003	4843	4844	9.72242e-05	7134	7135	0.000158197	9411	9412	0.000187369	17058	17059	0.000434536	4448	9059	9060	0.000318915	15773	15774	0.000374535	1405	1406	3.2769e-05	1467	1468	4.11427e-05	3600	3601	7.82582e-05	13868	13869	0.000323341	25543	25544	0.000671369
ALFAYSSF	GCCCTGTTTGCTTATTCTTCTTTT	Pool 13	25603	25604	0.000629243	11000	11001	0.000220802	22313	22314	0.000494744	28671	28672	0.000570786	16933	16934	0.000431351	4438	17364	17365	0.000611253	30895	30896	0.000733589	13554	13555	0.00031592	98924	98925	0.00277251	35690	35691	0.000775649	12683	12684	0.000295714	15040	15041	0.00039532
ALFIMFAL	GCACTATTTATCATGTTTGCGTTA	Pool 13	18118	18119	0.000445292	309688	309689	0.00621579	4734	4735	0.000104984	12414	12415	0.000247151	14785	14786	0.000376637	4343	11619	11620	0.000409028	17900	17901	0.000425038	4137	4138	9.64424e-05	3507	3508	9.83165e-05	8549	8550	0.000185812	35503	35504	0.000827739	11987	11988	0.000315079
ALFLEFNM	GCATTATTTCTGGAATTCAATATG	Pool 13	9625	9626	0.000236568	1338	1339	2.68751e-05	5182	5183	0.000114917	23157	23158	0.000461016	4035	4036	0.000102807	2816	6105	6106	0.000214933	10097	10098	0.000239765	4363	4364	0.00010171	1973	1974	5.5324e-05	4900	4901	0.00010651	65727	65728	0.00153238	3749	3750	9.85607e-05
ALFLSLQL	GCCTTATTCCTGTCTCTGCAGCTT	Pool 13	7450	7451	0.000183116	490	491	9.85489e-06	8651	8652	0.000191832	5342	5343	0.000106365	8299	8300	0.000211422	3732	4609	4610	0.000162273	7942	7943	0.000188597	448	449	1.04646e-05	8063	8064	0.000226005	3869	3870	8.41042e-05	532	533	1.24263e-05	2187	2188	5.75069e-05
ALFYRHYL	GCACTTTTCTACCGACACTATCTG	Pool 13	11765	11766	0.000289161	1630	1631	3.27359e-05	8733	8734	0.00019365	6996	6997	0.000139292	5165	5166	0.000131591	3108	7432	7433	0.000261644	12409	12410	0.000294661	4105	4106	9.56966e-05	2037	2038	5.71177e-05	5425	5426	0.00011792	35598	35599	0.000829954	79414	79415	0.00208725
ALGSYATL	GCTCTCGGCTCATATGCCACTCTC	Pool 13	899	900	2.21184e-05	3	4	8.02842e-08	770	771	1.70946e-05	60	61	1.21435e-06	492	493	1.25579e-05	950	425	426	1.49953e-05	543	544	1.29166e-05	97	98	2.28404e-06	3	4	1.12105e-07	15	16	3.47717e-07	NA	1	2.3314e-08	212	213	5.59825e-06
ALIELANL	GCCCTAATCGAACTGGCCAATCTT	Pool 13	2259	2260	5.55417e-05	5	6	1.20426e-07	272	273	6.05294e-06	445	446	8.87871e-06	303	304	7.74364e-06	738.5	1261	1262	4.44228e-05	2318	2319	5.50619e-05	3352	3353	7.81468e-05	552	553	1.54986e-05	209	210	4.56379e-06	3858	3859	8.99686e-05	123	124	3.25907e-06
ALIKYHTL	GCACTTATAAAGTATCATACCCTG	Pool 13	9823	9824	0.000241434	1722	1723	3.45824e-05	5977	5978	0.000132544	5490	5491	0.000109312	991	992	2.52687e-05	1366	5193	5194	0.00018283	9322	9323	0.000221363	733	734	1.7107e-05	3437	3438	9.63547e-05	1406	1407	3.05774e-05	13682	13683	0.000319005	1700	1701	4.47071e-05
ALLLFRHL	GCTTTACTGTTATTCCGTCATCTT	Pool 13	20679	20680	0.000508231	2711	2712	5.44327e-05	16012	16013	0.000355039	6220	6221	0.000123844	9212	9213	0.000234678	3854.5	15702	15703	0.000552751	21722	21723	0.000515787	12412	12413	0.000289304	32392	32393	0.000907858	24777	24778	0.000538484	9289	9290	0.000216587	8201	8202	0.000215572
ALQYVAPL	GCTCTGCAATATGTAGCGCCTCTC	Pool 13	3696	3697	9.08573e-05	775	776	1.55751e-05	43	44	9.75565e-07	4501	4502	8.96232e-05	3476	3477	8.85679e-05	2640	2022	2023	7.12102e-05	3477	3478	8.25809e-05	7134	7135	0.000166292	4345	4346	0.000121803	274	275	5.97639e-06	510	511	1.19134e-05	988	989	2.59937e-05
ALTRFSHL	GCACTGACGCGGTTCTCCCATCTT	Pool 13	3242	3243	7.96998e-05	616	617	1.23838e-05	728	729	1.61633e-05	659	660	1.31389e-05	52	53	1.35004e-06	369.5	2109	2110	7.42727e-05	2911	2912	6.9142e-05	1015	1016	2.36794e-05	17	18	5.04475e-07	3155	3156	6.85873e-05	52	53	1.23564e-06	274	275	7.22778e-06
ALVVFAYI	GCCTTAGTCGTATTTGCTTATATA	Pool 13	7681	7682	0.000188793	7307	7308	0.000146679	7108	7109	0.00015762	9894	9895	0.000196984	2077	2078	5.29319e-05	2061	5546	5547	0.000195256	8577	8578	0.000203674	9563	9564	0.000222904	1707	1708	4.7869e-05	19844	19845	0.000431278	154	155	3.61366e-06	1630	1631	4.28673e-05
ALYDYMPM	GCATTGTATGACTATATGCCCATG	Pool 13	7548	7549	0.000185524	798	799	1.60368e-05	9649	9650	0.000213959	3630	3631	7.22839e-05	5434	5435	0.000138443	3188	4508	4509	0.000158718	7381	7382	0.000175277	2624	2625	6.11796e-05	2632	2633	7.37934e-05	4725	4726	0.000102707	46721	46722	0.00108928	2713	2714	7.13316e-05
ALYFVALM	GCTTTGTACTTTGTGGCACTGATG	Pool 13	9067	9068	0.000222855	944	945	1.89671e-05	3629	3630	8.04841e-05	8905	8906	0.000177296	5897	5898	0.000150237	3286	5783	5784	0.000203599	8562	8563	0.000203318	7248	7249	0.000168949	3222	3223	9.0329e-05	9744	9745	0.000211782	850	851	1.98402e-05	4663	4664	0.000122583
ALYNLLAL	GCTCTTTACAACCTACTTGCCCTG	Pool 13	3479	3480	8.55244e-05	1801	1802	3.6168e-05	126	127	2.81583e-06	1244	1245	2.47847e-05	3533	3534	9.00198e-05	2660	2108	2109	7.42375e-05	3523	3524	8.36732e-05	324	325	7.57462e-06	279	280	7.84738e-06	1315	1316	2.85998e-05	35538	35539	0.000828555	177	178	4.67835e-06
ALYRGVSL	GCGCTTTACAGGGGCGTCTCATTA	Pool 13	8072	8073	0.000198402	219	220	4.41563e-06	2462	2463	5.46095e-05	3515	3516	6.99945e-05	1349	1350	3.43879e-05	1650.5	4874	4875	0.000171602	8470	8471	0.000201134	298	299	6.96865e-06	428	429	1.20233e-05	1149	1150	2.49922e-05	3297	3298	7.68895e-05	1052	1053	2.76758e-05
ALYRKMRL	GCTCTGTATAGAAAGATGAGGTTA	Pool 13	10856	10857	0.000266821	1483	1484	2.97854e-05	2991	2992	6.63384e-05	1688	1689	3.36236e-05	15273	15274	0.000389067	4363	5170	5171	0.000182021	8466	8467	0.000201039	13696	13697	0.000319229	664	665	1.86375e-05	6394	6395	0.000138978	6176	6177	0.00014401	17211	17212	0.00045238
ALYRYFSR	GCCCTTTATCGCTACTTTTCCCGG	Pool 13	11117	11118	0.000273236	5577	5578	0.000111956	4225	4226	9.36986e-05	13615	13616	0.000271059	5379	5380	0.000137042	3164	7619	7620	0.000268226	12102	12103	0.000287371	5215	5216	0.000121567	5944	5945	0.000166617	5760	5761	0.0001252	6848	6849	0.000159677	7727	7728	0.000203114
ALYTHCLF	GCGCTCTATACGCATTGTCTCTTC	Pool 13	49162	49163	0.00120823	21239	21240	0.000426309	61606	61607	0.00136595	18210	18211	0.000362534	34122	34123	0.000869198	4828	34811	34812	0.00122539	52414	52415	0.00124453	37152	37153	0.000865907	45500	45501	0.00127523	84693	84694	0.0018406	50677	50678	0.00118151	49779	49780	0.00130836
AMFFAPTM	GCAATGTTCTTTGCACCCACTATG	Pool 13	19127	19128	0.000470089	7117	7118	0.000142866	6461	6462	0.000143275	16180	16181	0.000322122	12519	12520	0.000318916	4197	11768	11769	0.000414272	20697	20698	0.000491449	4034	4035	9.40418e-05	6168	6169	0.000172895	6092	6093	0.000132415	33298	33299	0.000776332	3958	3959	0.000104054
AMFLHFSL	GCTATGTTCTTACACTTTTCCTTA	Pool 13	28400	28401	0.000697982	7346	7347	0.000147462	17941	17942	0.000397809	43229	43230	0.000860598	15175	15176	0.000386571	4359	21380	21381	0.000752618	30623	30624	0.00072713	35600	35601	0.000829736	4593	4594	0.000128753	21333	21334	0.000463638	71752	71753	0.00167285	18393	18394	0.000483447
AMFVLLGL	GCGATGTTTGTCCTTCTGGGTCTG	Pool 13	4093	4094	0.000100614	92	93	1.86661e-06	1306	1307	2.89787e-05	2632	2633	5.24162e-05	762	763	1.94355e-05	1187	1759	1760	6.19526e-05	4081	4082	9.69222e-05	2143	2144	4.99692e-05	297	298	8.35186e-06	20309	20310	0.000441384	448	449	1.0468e-05	2359	2360	6.20275e-05
AMHVHGSL	GCCATGCATGTGCACGGCAGTCTC	Pool 13	9009	9010	0.000221429	2074	2075	4.16474e-05	1778	1779	3.94439e-05	4816	4817	9.58941e-05	914	915	2.33073e-05	1311	6158	6159	0.000216799	9113	9114	0.000216401	1113	1114	2.59635e-05	5869	5870	0.000164515	454	455	9.88822e-06	5469	5470	0.000127527	6358	6359	0.000167133
AMLFALNI	GCCATGTTATTTGCGCTGAACATA	Pool 13	23604	23605	0.000580116	5482	5483	0.00011005	13207	13208	0.000292847	131331	131332	0.00261448	12198	12199	0.000310739	4178.5	12763	12764	0.000449297	24151	24152	0.00057346	5559	5560	0.000129584	3833	3834	0.000107453	7330	7331	0.00015932	12779	12780	0.000297952	7991	7992	0.000210053
AMLMRVGL	GCTATGTTAATGAGGGTGGGCCTT	Pool 13	804	805	1.97837e-05	43	44	8.83127e-07	1108	1109	2.45887e-05	1439	1440	2.86667e-05	95	96	2.44536e-06	470	302	303	1.06657e-05	995	996	2.36488e-05	1574	1575	3.67078e-05	24	25	7.00659e-07	14281	14282	0.000310381	31	32	7.46047e-07	264	265	6.96495e-06
AMRSLASL	GCTATGAGGTCGCTGGCTAGCCTT	Pool 13	7157	7158	0.000175915	368	369	7.40622e-06	2478	2479	5.49642e-05	5315	5316	0.000105828	1829	1830	4.66147e-05	1942	3942	3943	0.000138795	6070	6071	0.000144149	13120	13121	0.000305805	33	34	9.52897e-07	1451	1452	3.15554e-05	7771	7772	0.000181196	2170	2171	5.70601e-05
AMVFFVVL	GCAATGGTGTTCTTCGTCGTCTTG	Pool 13	34608	34609	0.00085055	67171	67172	0.00134821	98281	98282	0.0021791	140188	140189	0.0027908	17192	17193	0.000437949	4454	20267	20268	0.00071344	31112	31113	0.000738741	18354	18355	0.000427791	10866	10867	0.000304563	181855	181856	0.00395216	3708	3709	8.64715e-05	16867	16868	0.000443339
AMVRCLPL	GCGATGGTTAGGTGCCTACCCCTA	Pool 13	1152	1153	2.83361e-05	279	280	5.6199e-06	288	289	6.40769e-06	73	74	1.47315e-06	20	21	5.34923e-07	279.5	759	760	2.67522e-05	1283	1284	3.0487e-05	6561	6562	0.000152937	139055	139056	0.00389723	30	31	6.73703e-07	27	28	6.52791e-07	483	484	1.27209e-05
AMVVYLNI	GCTATGGTCGTGTACCTTAATATC	Pool 13	9868	9869	0.00024254	4372	4373	8.77707e-05	22682	22683	0.000502926	6657	6658	0.000132544	9212	9213	0.000234678	3854.5	6266	6267	0.0002206	10516	10517	0.000249714	1374	1375	3.20465e-05	1362	1363	3.81999e-05	2231	2232	4.85066e-05	4051	4052	9.44682e-05	20669	20670	0.000543266
ANAWHHGL	GCCAATGCATGGCACCACGGTTTA	Pool 13	9656	9657	0.00023733	1201	1202	2.41254e-05	10289	10290	0.000228149	8158	8159	0.000162425	44392	44393	0.0011308	4902	4801	4802	0.000169032	9390	9391	0.000222978	2133	2134	4.97361e-05	534	535	1.49941e-05	4991	4992	0.000108488	7803	7804	0.000181942	2472	2473	6.49975e-05
ANCIFLNI	GCGAACTGCATTTTCTTAAATATC	Pool 13	13065	13066	0.00032111	910	911	1.82847e-05	13609	13610	0.00030176	8507	8508	0.000169372	6436	6437	0.000163967	3405	9349	9350	0.000329123	14751	14752	0.000350269	4858	4859	0.000113246	1714	1715	4.80652e-05	11843	11844	0.000257398	1794	1795	4.18486e-05	5449	5450	0.000143242
ANFDKSRL	GCGAATTTCGACAAATCACGCCTT	Pool 13	3323	3324	8.16905e-05	3975	3976	7.98025e-05	321	322	7.13936e-06	14924	14925	0.000297118	6628	6629	0.000168857	3448	2040	2041	7.18438e-05	3489	3490	8.28659e-05	1070	1071	2.49613e-05	321	322	9.02449e-06	53	54	1.17355e-06	6	7	1.63198e-07	751	752	1.97647e-05
ANFFLRLI	GCTAATTTCTTTCTCCGCCTAATA	Pool 13	13386	13387	0.000328998	3607	3608	7.24164e-05	16914	16915	0.000375038	11779	11780	0.000234509	6220	6221	0.000158464	3356.5	8404	8405	0.000295859	13698	13699	0.000325266	18476	18477	0.000430635	5191	5192	0.000145513	9384	9385	0.000203958	36622	36623	0.000853827	2609	2610	6.85982e-05
ANFLEEPL	GCAAACTTTCTCGAGGAGCCACTG	Pool 13	7295	7296	0.000179306	530	531	1.06577e-05	9490	9491	0.000210434	1295	1296	2.58e-05	1412	1413	3.59927e-05	1699.5	3943	3944	0.00013883	7001	7002	0.000166254	4497	4498	0.000104833	98	99	2.77461e-06	18316	18317	0.000398071	10400	10401	0.000242489	1046	1047	2.75181e-05
ANFQFFSC	GCAAACTTCCAGTTCTTTAGCTGT	Pool 13	6898	6899	0.00016955	967	968	1.94288e-05	644	645	1.43009e-05	4019	4020	8.00278e-05	85	86	2.19064e-06	448	4036	4037	0.000142104	6180	6181	0.00014676	1972	1973	4.59838e-05	18	19	5.32501e-07	8879	8880	0.000192983	2202	2203	5.13607e-05	942	943	2.47847e-05
ANISYLTV	GCCAACATCAGTTACTTAACAGTC	Pool 13	1861	1862	4.57604e-05	186	187	3.75329e-06	3007	3008	6.66932e-05	4775	4776	9.50779e-05	193	194	4.94167e-06	604.5	1151	1152	4.05508e-05	2662	2663	6.32297e-05	50	51	1.18863e-06	210	211	5.91356e-06	39961	39962	0.000868468	335	336	7.83349e-06	990	991	2.60463e-05
ANKTFIYL	GCCAATAAAACTTTCATTTACTTG	Pool 13	1831	1832	4.50232e-05	646	647	1.2986e-05	305	306	6.78461e-06	1421	1422	2.83084e-05	1500	1501	3.82342e-05	1749.5	1124	1125	3.96004e-05	2222	2223	5.27825e-05	404	405	9.43914e-06	438	439	1.23036e-05	317	318	6.91088e-06	5549	5550	0.000129393	579	580	1.52441e-05
ANLSFADI	GCGAACCTGAGCTTCGCGGATATC	Pool 13	7085	7086	0.000174145	32324	32325	0.000648797	64216	64217	0.00142381	5792	5793	0.000115324	1768	1769	4.50609e-05	1895.5	3826	3827	0.000134712	7376	7377	0.000175158	428	429	9.9985e-06	128	129	3.6154e-06	2036	2037	4.42688e-05	141	142	3.31058e-06	7543	7544	0.000198278
ANLSFAVL	GCTAACTTATCTTTTGCTGTCTTA	Pool 13	32626	32627	0.00080184	8269	8270	0.000165988	29119	29120	0.000645647	30935	30936	0.000615856	15101	15102	0.000384686	4354	23722	23723	0.000835057	34680	34681	0.000823459	11798	11799	0.000274994	5988	5989	0.00016785	76076	76077	0.00165333	14621	14622	0.000340897	10692	10693	0.000281042
ANLSFTDI	GCGAACCTCTCTTTCACAGACATT	Pool 13	14152	14153	0.000347824	9506	9507	0.000190816	13947	13948	0.000309254	3526	3527	7.02135e-05	4298	4299	0.000109506	2879	8261	8262	0.000290825	14419	14420	0.000342386	8953	8954	0.000208687	2120	2121	5.94439e-05	13267	13268	0.000288345	8468	8469	0.000197446	41551	41552	0.0010921
ANLYFLDV	GCGAATCTCTACTTCTTGGACGTT	Pool 13	9597	9598	0.00023588	1175	1176	2.36036e-05	10378	10379	0.000230122	77226	77227	0.00153739	4589	4590	0.000116919	2970	6930	6931	0.000243973	10937	10938	0.00025971	17692	17693	0.000412362	333	334	9.36081e-06	6578	6579	0.000142977	1587	1588	3.70226e-05	3777	3778	9.92966e-05
ANNFTTPL	GCAAATAATTTCACTACGCCGTTG	Pool 13	3254	3255	7.99948e-05	519	520	1.04369e-05	905	906	2.00878e-05	617	618	1.23028e-05	1316	1317	3.35473e-05	1619	2129	2130	7.49767e-05	3541	3542	8.41006e-05	274	275	6.40929e-06	13	14	3.92369e-07	277	278	6.04159e-06	25746	25747	0.000600265	707	708	1.86083e-05
ANSPYATL	GCTAACAGCCCGTACGCCACATTG	Pool 13	2678	2679	6.5839e-05	4	5	1.00355e-07	293	294	6.51855e-06	367	368	7.32593e-06	6764	6765	0.000172322	3476	1102	1103	3.88259e-05	2764	2765	6.56516e-05	722	723	1.68506e-05	12	13	3.64343e-07	8680	8681	0.000188658	2567	2568	5.98703e-05	3202	3203	8.4184e-05
ANYDFYQL	GCGAACTACGATTTCTATCAACTT	Pool 13	9931	9932	0.000244088	1926	1927	3.86769e-05	17021	17022	0.000377411	1917	1918	3.81824e-05	6400	6401	0.00016305	3399	5914	5915	0.00020821	11099	11100	0.000263556	5734	5735	0.000133663	188	189	5.29698e-06	1618	1619	3.51847e-05	386	387	9.0225e-06	33637	33638	0.000884102
ANYILLAF	GCTAACTATATCCTGCTCGCTTTC	Pool 13	9374	9375	0.0002304	28450	28451	0.000571042	38607	38608	0.000856014	5627	5628	0.000112039	5192	5193	0.000132279	3115	7187	7188	0.00025302	10276	10277	0.000244015	1342	1343	3.13007e-05	29920	29921	0.000838577	5948	5949	0.000129286	8207	8208	0.000191361	5588	5589	0.000146895
ANYKTIGL	GCAAACTATAAAACGATTGGTCTG	Pool 13	1270	1271	3.1236e-05	2	3	6.02132e-08	1612	1613	3.57633e-05	3522	3523	7.01339e-05	8	9	2.29253e-07	229	758	759	2.6717e-05	1188	1189	2.82314e-05	81	82	1.91114e-06	4	5	1.40132e-07	15	16	3.47717e-07	102	103	2.40134e-06	1583	1584	4.1632e-05
ANYSDCFL	GCTAACTACTCCGATTGTTTCCTC	Pool 13	10668	10669	0.000262201	741	742	1.48927e-05	15645	15646	0.000346902	5365	5366	0.000106823	13219	13220	0.000336747	4245	6111	6112	0.000215144	10082	10083	0.000239409	4379	4380	0.000102083	3814	3815	0.000106921	366	367	7.97577e-06	703	704	1.6413e-05	6404	6405	0.000168342
APFFATFL	GCACCGTTCTTTGCTACATTCCTT	Pool 13	13502	13503	0.000331849	460	461	9.25276e-06	6800	6801	0.000150791	29601	29602	0.0005893	5140	5141	0.000130954	3100	9735	9736	0.00034271	15072	15073	0.00035789	27227	27228	0.00063459	56851	56852	0.00159336	7314	7315	0.000158972	1102	1103	2.57153e-05	4956	4957	0.000130284
APFVYTYL	GCTCCCTTCGTTTATACCTACTTA	Pool 13	7174	7175	0.000176333	3446	3447	6.91849e-05	6159	6160	0.000136579	26636	26637	0.000530274	5944	5945	0.000151434	3296	4974	4975	0.000175122	8259	8260	0.000196124	9997	9998	0.000233019	316	317	8.88436e-06	21539	21540	0.000468115	3210	3211	7.48611e-05	13976	13977	0.000367355
APRLYYPL	GCTCCTCGTCTCTACTATCCCCTA	Pool 13	13102	13103	0.000322019	715	716	1.43709e-05	7797	7798	0.000172897	5110	5111	0.000101747	4507	4508	0.00011483	2952	9108	9109	0.00032064	14293	14294	0.000339394	5779	5780	0.000134712	416	417	1.1687e-05	8330	8331	0.000181052	11764	11765	0.000274289	1138	1139	2.99362e-05
AQATYSGL	GCCCAGGCAACCTATTCGGGGCTT	Pool 13	1927	1928	4.73825e-05	13	14	2.80995e-07	49	50	1.1086e-06	27	28	5.57408e-07	368	369	9.39936e-06	816	1089	1090	3.83683e-05	2311	2312	5.48957e-05	177	178	4.14856e-06	1425	1426	3.99656e-05	6	7	1.52126e-07	45	46	1.07244e-06	3984	3985	0.000104737
AQFFQAGV	GCTCAATTCTTTCAAGCTGGGGTG	Pool 13	8555	8556	0.000210272	179	180	3.61279e-06	9285	9286	0.000205889	8788	8789	0.000174966	1414	1415	3.60436e-05	1702.5	5367	5368	0.000188955	8549	8550	0.00020301	8323	8324	0.000194004	764	765	2.14402e-05	2891	2892	6.28499e-05	5973	5974	0.000139278	1130	1131	2.97259e-05
AQFYFLCL	GCTCAATTTTATTTCCTTTGTTTG	Pool 13	31386	31387	0.000771366	20715	20716	0.000415792	31328	31329	0.000694624	42969	42970	0.000855422	11297	11298	0.000287788	4097	23273	23274	0.000819252	34587	34588	0.000821251	16138	16139	0.000376144	6994	6995	0.000196044	41678	41679	0.000905782	18655	18656	0.000434945	29638	29639	0.000778997
AQIFFVYI	GCGCAAATATTCTTCGTCTATATA	Pool 13	28435	28436	0.000698842	88607	88608	0.00177846	23025	23026	0.000510531	25811	25812	0.00051385	35287	35288	0.000898874	4838	17446	17447	0.00061414	30007	30008	0.000712504	11902	11903	0.000277418	19749	19750	0.000553521	14762	14763	0.000320835	40231	40232	0.000937967	8674	8675	0.000228004
AQLHFLCL	GCGCAGTTACATTTCCTCTGCCTT	Pool 13	11950	11951	0.000293707	2167	2168	4.35141e-05	4358	4359	9.66474e-05	4162	4163	8.28746e-05	16038	16039	0.000408554	4394	8284	8285	0.000291635	13921	13922	0.000330561	1523	1524	3.55191e-05	10703	10704	0.000299994	15509	15510	0.000337069	695	696	1.62265e-05	9031	9032	0.000237387
AQRAFVAL	GCCCAGCGCGCGTTCGTGGCATTA	Pool 13	5127	5128	0.000126026	1089	1090	2.18775e-05	6647	6648	0.000147399	371	372	7.40556e-06	3635	3636	9.2618e-05	2689	2844	2845	0.000100145	5366	5367	0.000127433	8027	8028	0.000187105	207	208	5.82948e-06	295	296	6.43277e-06	3239	3240	7.55372e-05	2844	2845	7.47747e-05
AQRTYGPL	GCTCAACGGACCTATGGTCCATTG	Pool 13	2286	2287	5.62052e-05	933	934	1.87464e-05	1043	1044	2.31475e-05	591	592	1.17852e-05	35	36	9.1701e-07	326	993	994	3.49891e-05	1504	1505	3.57344e-05	425	426	9.92858e-06	213	214	5.99764e-06	6015	6016	0.000130742	6	7	1.63198e-07	856	857	2.25244e-05
AQSNYVRL	GCCCAATCGAACTATGTTCGACTC	Pool 13	7635	7636	0.000187662	6919	6920	0.000138892	2897	2898	6.42542e-05	5881	5882	0.000117095	4989	4990	0.000127108	3067	4611	4612	0.000162344	8170	8171	0.000194011	10852	10853	0.000252946	143	144	4.0358e-06	20807	20808	0.000452207	5706	5707	0.000133053	18494	18495	0.000486101
AQTSFFRL	GCGCAAACCAGTTTCTTTAGATTG	Pool 13	9795	9796	0.000240746	363	364	7.30586e-06	2810	2811	6.23253e-05	3795	3796	7.55686e-05	5453	5454	0.000138927	3194	5787	5788	0.000203739	10788	10789	0.000256172	3851	3852	8.97767e-05	1288	1289	3.6126e-05	6750	6751	0.000146715	2692	2693	6.27845e-05	8229	8230	0.000216308
AQVPFIAL	GCCCAGGTTCCCTTTATAGCATTA	Pool 13	6183	6184	0.000151978	6062	6063	0.000121691	1529	1530	3.3923e-05	1421	1422	2.83084e-05	6048	6049	0.000154083	3315	3385	3386	0.000119188	6521	6522	0.000154857	2020	2021	4.71025e-05	8355	8356	0.000234188	984	985	2.14064e-05	5289	5290	0.000123331	2507	2508	6.59174e-05
AQYRFNLS	GCGCAGTACCGATTCAATTTGTCC	Pool 13	4786	4787	0.000117645	517	518	1.03968e-05	2657	2658	5.8933e-05	2258	2259	4.49709e-05	1222	1223	3.11529e-05	1544	2994	2995	0.000105425	4927	4928	0.000117009	204	205	4.77784e-06	27450	27451	0.000769352	190	191	4.15088e-06	4694	4695	0.000109459	232	233	6.1239e-06
ARRFFAPL	GCGCGCCGTTTCTTCGCTCCGTTA	Pool 13	5290	5291	0.000130031	7	8	1.60568e-07	617	618	1.37023e-05	6408	6409	0.000127587	330	331	8.4314e-06	777	3546	3547	0.000124856	5617	5618	0.000133393	268	269	6.26946e-06	136	137	3.83961e-06	268	269	5.846e-06	1947	1948	4.54156e-05	205	206	5.41427e-06
ASAAYLSL	GCCTCTGCGGCATACTTGTCCTTA	Pool 13	6017	6018	0.000147898	237	238	4.77691e-06	34202	34203	0.000758346	3424	3425	6.81829e-05	1281	1282	3.26558e-05	1590.5	3622	3623	0.000127531	5861	5862	0.000139186	3091	3092	7.20638e-05	500	501	1.40412e-05	6365	6366	0.000138348	2289	2290	5.3389e-05	4062	4063	0.000106787
ASAEFCNI	GCTTCCGCTGAATTCTGCAATATA	Pool 13	12104	12105	0.000297492	861	862	1.73013e-05	6719	6720	0.000148995	14921	14922	0.000297059	18929	18930	0.000482195	4521	7781	7782	0.000273929	12895	12896	0.0003062	4179	4180	9.74213e-05	120	121	3.39119e-06	8398	8399	0.00018253	4829	4830	0.000112606	14348	14349	0.000377133
ASASFQEL	GCCAGCGCCAGCTTTCAGGAGTTG	Pool 13	4767	4768	0.000117178	127	128	2.5691e-06	2579	2580	5.72036e-05	787	788	1.56871e-05	1279	1280	3.26048e-05	1587.5	2414	2415	8.50088e-05	5018	5019	0.00011917	383	384	8.94971e-06	2155	2156	6.04248e-05	872	873	1.89723e-05	3	4	9.32559e-08	1420	1421	3.73479e-05
ASASHSRL	GCCTCCGCCAGTCATTCCAGACTA	Pool 13	9996	9997	0.000245686	11273	11274	0.000226281	1444	1445	3.20384e-05	1485	1486	2.95824e-05	12326	12327	0.000314	4187	5618	5619	0.000197791	9531	9532	0.000226326	4468	4469	0.000104157	44	45	1.26119e-06	11819	11820	0.000256876	4200	4201	9.7942e-05	4024	4025	0.000105788
ASAVFRLL	GCATCGGCCGTGTTTCGGCTACTA	Pool 13	1663	1664	4.08944e-05	696	697	1.39895e-05	188	189	4.19049e-06	840	841	1.67421e-05	654	655	1.66845e-05	1108	1015	1016	3.57635e-05	2418	2419	5.74363e-05	5	6	1.39839e-07	21	22	6.1658e-07	165	166	3.60757e-06	6155	6156	0.000143521	108	109	2.86483e-06
ASCLYYLL	GCAAGTTGCCTTTATTATCTTCTC	Pool 13	12045	12046	0.000296042	16408	16409	0.000329346	10338	10339	0.000229236	7389	7390	0.000147116	8823	8824	0.000224769	3800	8227	8228	0.000289628	13100	13101	0.000311068	28319	28320	0.000660041	7972	7973	0.000223454	64071	64072	0.00139243	4576	4577	0.000106708	2527	2528	6.6443e-05
ASFDKAKL	GCGTCCTTTGATAAGGCCAAACTT	Pool 13	7129	7130	0.000175227	850	851	1.70805e-05	10601	10602	0.000235067	5480	5481	0.000109113	5081	5082	0.000129451	3086	3506	3507	0.000123447	6863	6864	0.000162977	1394	1395	3.25126e-05	177	178	4.98869e-06	15408	15409	0.000334874	7439	7440	0.000173456	1448	1449	3.80838e-05
ASFEQAAF	GCGTCTTTTGAACAGGCCGCTTTT	Pool 13	29498	29499	0.000724966	9923	9924	0.000199185	20847	20848	0.00046224	11947	11948	0.000237854	33997	33998	0.000866014	4826	19983	19984	0.000703443	32598	32599	0.000774024	15924	15925	0.000371156	20820	20821	0.000583537	48658	48659	0.00105747	19823	19824	0.000462176	24369	24370	0.000640513
ASFHRFNL	GCCAGTTTCCATCGATTTAACCTC	Pool 13	17519	17520	0.000430571	3503	3504	7.0329e-05	10016	10017	0.000222096	23786	23787	0.000473538	18100	18101	0.000461078	4489	11724	11725	0.000412724	18441	18442	0.000437883	17235	17236	0.000401711	16633	16634	0.000466191	19113	19114	0.000415392	7997	7998	0.000186465	10712	10713	0.000281568
ASFLPLLL	GCCTCATTCCTGCCTCTCCTTCTA	Pool 13	834	835	2.05209e-05	10	11	2.20782e-07	868	869	1.92674e-05	2147	2148	4.27611e-05	948	949	2.41734e-05	1336	653	654	2.3021e-05	818	819	1.94462e-05	78	79	1.84122e-06	64	65	1.82171e-06	6	7	1.52126e-07	34	35	8.15989e-07	888	889	2.33655e-05
ASFNSGEL	GCAAGCTTCAATTCTGGGGAACTT	Pool 13	4212	4213	0.000103539	2455	2456	4.92945e-05	389	390	8.64705e-06	304	305	6.07176e-06	1801	1802	4.59015e-05	1917	2601	2602	9.15912e-05	4305	4306	0.000102241	1079	1080	2.5171e-05	4106	4107	0.000115104	20939	20940	0.000455075	22466	22467	0.000523795	45611	45612	0.00119881
ASFPFPGS	GCCAGCTTTCCATTTCCCGGATCT	Pool 13	12657	12658	0.000311083	4743	4744	9.52171e-05	7860	7861	0.000174294	7083	7084	0.000141024	16561	16562	0.000421876	4422	9187	9188	0.00032342	15676	15677	0.000372232	6744	6745	0.000157203	16040	16041	0.000449571	21920	21921	0.000476395	8755	8756	0.000204137	2359	2360	6.20275e-05
ASFPKLEL	GCTAGCTTCCCTAAACTCGAATTG	Pool 13	8477	8478	0.000208355	5183	5184	0.000104048	732	733	1.6252e-05	2898	2899	5.77116e-05	6915	6916	0.000176168	3507	5227	5228	0.000184027	8374	8375	0.000198854	32837	32838	0.00076534	112	113	3.16698e-06	1629	1630	3.54237e-05	2404	2405	5.60701e-05	1341	1342	3.52716e-05
ASFSNNNL	GCCTCATTTAGTAACAATAATCTA	Pool 13	3417	3418	8.40006e-05	513	514	1.03165e-05	426	427	9.46741e-06	1831	1832	3.64704e-05	299	300	7.64175e-06	731	1869	1870	6.58246e-05	3334	3335	7.91856e-05	283	284	6.61905e-06	13	14	3.92369e-07	1805	1806	3.92486e-05	4850	4851	0.000113096	226	227	5.96621e-06
ASFTHSFV	GCTAGTTTTACCCACAGCTTTGTA	Pool 13	11551	11552	0.000283902	1087	1088	2.18373e-05	7466	7467	0.000165558	68595	68596	0.00136557	11014	11015	0.00028058	4068	7744	7745	0.000272626	12869	12870	0.000305583	3821	3822	8.90775e-05	2401	2402	6.73193e-05	13389	13390	0.000290996	1919	1920	4.47628e-05	3012	3013	7.91902e-05
ASFTVSVF	GCGTCGTTTACGGTATCAGTTTTC	Pool 13	4753	4754	0.000116834	675	676	1.3568e-05	1548	1549	3.43443e-05	2024	2025	4.03125e-05	1871	1872	4.76845e-05	1960	3406	3407	0.000119927	5091	5092	0.000120903	1040	1041	2.42621e-05	3714	3715	0.000104118	413	414	8.99719e-06	36	37	8.62617e-07	4207	4208	0.000110598
ASFYISLV	GCATCCTTCTACATATCTTTGGTC	Pool 13	4905	4906	0.00012057	761	762	1.52941e-05	6856	6857	0.000152033	2747	2748	5.47056e-05	3908	3909	9.9572e-05	2767	2723	2724	9.58857e-05	4355	4356	0.000103428	1176	1177	2.74318e-05	5157	5158	0.00014456	5450	5451	0.000118463	639	640	1.49209e-05	1168	1169	3.07246e-05
ASGAFLPL	GCCAGCGGAGCCTTCCTGCCTTTA	Pool 13	1746	1747	4.29342e-05	724	725	1.45515e-05	785	786	1.74271e-05	1921	1922	3.82621e-05	607	608	1.54873e-05	1065.5	831	832	2.92867e-05	1742	1743	4.13854e-05	1	2	4.66131e-08	2	3	8.40791e-08	195	196	4.25954e-06	3	4	9.32559e-08	108	109	2.86483e-06
ASGFFSVF	GCATCAGGCTTCTTCTCTGTGTTC	Pool 13	27536	27537	0.000676748	11726	11727	0.000235373	7738	7739	0.000171589	9506	9507	0.00018926	9240	9241	0.000235391	3860	17026	17027	0.000599356	26842	26843	0.000637355	5733	5734	0.00013364	74314	74315	0.00208278	18178	18179	0.000395072	7072	7073	0.0001649	10397	10398	0.000273289
ASHGFYEF	GCGTCACATGGATTCTACGAATTT	Pool 13	32955	32956	0.000809925	7411	7412	0.000148767	38867	38868	0.000861778	13131	13132	0.000261424	24021	24022	0.000611901	4673	18459	18460	0.000649798	30298	30299	0.000719413	38081	38082	0.000887559	26802	26803	0.000751191	51501	51502	0.00111926	18849	18850	0.000439468	15385	15386	0.000404388
ASHQFSPA	GCATCACACCAATTTTCTCCTGCT	Pool 13	7149	7150	0.000175718	1414	1415	2.84005e-05	2288	2289	5.07515e-05	5898	5899	0.000117434	1078	1079	2.74848e-05	1433.5	4374	4375	0.000154001	7966	7967	0.000189167	1146	1147	2.67326e-05	6832	6833	0.000191504	1417	1418	3.08165e-05	1476	1477	3.44347e-05	460	461	1.21164e-05
ASIFDSRL	GCGAGCATCTTCGATAGCCGATTG	Pool 13	5947	5948	0.000146178	929	930	1.86661e-05	1963	1964	4.35457e-05	3979	3980	7.92316e-05	4491	4492	0.000114423	2948	3530	3531	0.000124292	6098	6099	0.000144813	8	9	2.09759e-07	3060	3061	8.57887e-05	177	178	3.86836e-06	2516	2517	5.86813e-05	1032	1033	2.71502e-05
ASILWYNM	GCGAGCATCTTATGGTATAATATG	Pool 13	14315	14316	0.000351829	20498	20499	0.000411437	12099	12100	0.00026828	8285	8286	0.000164953	13878	13879	0.000353533	4286	7774	7775	0.000273682	15007	15008	0.000356347	6961	6962	0.00016226	16515	16516	0.000462883	4573	4574	9.94037e-05	4688	4689	0.000109319	21445	21446	0.000563662
ASITFFSP	GCATCTATCACTTTCTTCTCTCCT	Pool 13	61900	61901	0.00152128	42136	42137	0.000845734	59310	59311	0.00131504	99600	99601	0.0019828	35655	35656	0.000908248	4842	50217	50218	0.00176769	73422	73423	0.00174334	162280	162281	0.00378221	75959	75960	0.00212888	38332	38333	0.000833066	25719	25720	0.000599635	52931	52932	0.0013912
ASKHFMLF	GCCTCCAAACACTTCATGCTCTTT	Pool 13	9463	9464	0.000232587	5474	5475	0.000109889	5384	5385	0.000119396	6648	6649	0.000132364	10042	10043	0.00025582	3965	6079	6080	0.000214018	9916	9917	0.000235467	12681	12682	0.000295573	2335	2336	6.54696e-05	6625	6626	0.000143998	965	966	2.25213e-05	3064	3065	8.05569e-05
ASLCIAIL	GCCAGTTTGTGCATTGCCATTCTA	Pool 13	785	786	1.93167e-05	121	122	2.44867e-06	598	599	1.3281e-05	1220	1221	2.4307e-05	236	237	6.03698e-06	653.5	231	232	8.16647e-06	938	939	2.22954e-05	838	839	1.95542e-05	10	11	3.0829e-07	829	830	1.80378e-05	791	792	1.84647e-05	58	59	1.55069e-06
ASLELGKL	GCCTCACTAGAGCTCGGTAAATTG	Pool 13	7695	7696	0.000189137	845	846	1.69801e-05	7015	7016	0.000155558	987	988	1.96685e-05	6946	6947	0.000176958	3512	4634	4635	0.000163153	7759	7760	0.000184252	8969	8970	0.00020906	1495	1496	4.19274e-05	3946	3947	8.57776e-05	7840	7841	0.000182805	1048	1049	2.75707e-05
ASLFLTGI	GCCTCTCTGTTCCTGACGGGCATT	Pool 13	3193	3194	7.84956e-05	888	889	1.78432e-05	1114	1115	2.47217e-05	48163	48164	0.000958821	4377	4378	0.000111519	2908	1966	1967	6.9239e-05	3304	3305	7.84733e-05	154	155	3.61251e-06	99	100	2.80264e-06	27695	27696	0.000601899	159	160	3.73023e-06	270	271	7.12265e-06
ASLLMERL	GCGAGCCTTCTGATGGAGAGACTT	Pool 13	10657	10658	0.000261931	2079	2080	4.17478e-05	8269	8270	0.000183362	11965	11966	0.000238212	10925	10926	0.000278313	4051	6731	6732	0.000236969	11649	11650	0.000276615	16049	16050	0.00037407	7272	7273	0.000203836	5239	5240	0.000113877	3946	3947	9.20202e-05	7950	7951	0.000208975
ASLPLPSL	GCTAGCTTACCCCTGCCGTCTCTG	Pool 13	2429	2430	5.97196e-05	11768	11769	0.000236216	802	803	1.78041e-05	368	369	7.34584e-06	4327	4328	0.000110245	2893	1875	1876	6.60358e-05	2986	2987	7.09227e-05	269	270	6.29276e-06	24	25	7.00659e-07	520	521	1.13226e-05	1884	1885	4.39468e-05	4071	4072	0.000107024
ASLRYSGV	GCAAGTCTTAGATATTCAGGTGTG	Pool 13	5423	5424	0.0001333	15979	15980	0.000320735	8699	8700	0.000192896	834	835	1.66227e-05	1929	1930	4.91619e-05	1990.5	2993	2994	0.00010539	5479	5480	0.000130116	26339	26340	0.000613894	50	51	1.42934e-06	7875	7876	0.000171164	236	237	5.52541e-06	1388	1389	3.65069e-05
ASLSFVDI	GCCAGTTTGTCTTTTGTTGATATC	Pool 13	3305	3306	8.12481e-05	12957	12958	0.000260081	1901	1902	4.2171e-05	6092	6093	0.000121296	2430	2431	6.19237e-05	2231	1221	1222	4.30148e-05	3472	3473	8.24622e-05	3092	3093	7.20871e-05	9803	9804	0.000274771	3146	3147	6.83917e-05	976	977	2.27777e-05	621	622	1.63479e-05
ASLSLVTL	GCGTCTCTTTCCTTGGTCACCCTG	Pool 13	NA	1	2.4576e-08	NA	1	2.00711e-08	NA	1	2.21719e-08	NA	1	1.99074e-08	NA	1	2.54725e-08	64	NA	1	3.52003e-08	NA	1	2.37438e-08	NA	1	2.33065e-08	NA	1	2.80264e-08	1	2	4.34647e-08	NA	1	2.3314e-08	1	2	5.25657e-08
ASLTLTLL	GCCTCGTTGACACTTACGCTTCTT	Pool 13	11732	11733	0.00028835	3221	3222	6.46689e-05	5409	5410	0.00011995	7544	7545	0.000150202	9395	9396	0.00023934	3884	8307	8308	0.000292444	12311	12312	0.000292334	23189	23190	0.000540478	1425	1426	3.99656e-05	26699	26700	0.000580254	2200	2201	5.1314e-05	2426	2427	6.37885e-05
ASLTMSGM	GCTAGTTTAACAATGTCAGGCATG	Pool 13	6772	6773	0.000166453	136	137	2.74973e-06	1487	1488	3.29918e-05	33944	33945	0.000675758	539	540	1.37552e-05	1000	3579	3580	0.000126017	6673	6674	0.000158466	1602	1603	3.73604e-05	3005	3006	8.42473e-05	4760	4761	0.000103468	22475	22476	0.000524005	6194	6195	0.000162822
ASMSTYCL	GCTTCAATGTCAACATATTGCCTG	Pool 13	5467	5468	0.000134381	4416	4417	8.86539e-05	240	241	5.34343e-06	212	213	4.24028e-06	7410	7411	0.000188777	3610	3278	3279	0.000115422	4733	4734	0.000112403	3979	3980	9.276e-05	203	204	5.71738e-06	10058	10059	0.000218606	161	162	3.77686e-06	8657	8658	0.000227557
ASNHHYAL	GCATCGAATCACCACTACGCGCTT	Pool 13	1635	1636	4.02063e-05	22	23	4.61634e-07	3452	3453	7.65597e-05	117	118	2.34908e-06	4614	4615	0.000117556	2980	1063	1064	3.74531e-05	1443	1444	3.42861e-05	8304	8305	0.000193561	7	8	2.24211e-07	326	327	7.10648e-06	303	304	7.08745e-06	238	239	6.2816e-06
ASNVYGNM	GCGTCAAATGTCTATGGAAACATG	Pool 13	3048	3049	7.49321e-05	4507	4508	9.04803e-05	17177	17178	0.000380869	535	536	1.06704e-05	485	486	1.23796e-05	947	1257	1258	4.4282e-05	2401	2402	5.70326e-05	286	287	6.68897e-06	34	35	9.80923e-07	6490	6491	0.000141065	3369	3370	7.85681e-05	1489	1490	3.91614e-05
ASNYFRAM	GCATCCAATTACTTCCGCGCGATG	Pool 13	2985	2986	7.33838e-05	120	121	2.4286e-06	7	8	1.77375e-07	609	610	1.21435e-05	401	402	1.02399e-05	847.5	1783	1784	6.27974e-05	3013	3014	7.15638e-05	10	11	2.56372e-07	98	99	2.77461e-06	8708	8709	0.000189267	935	936	2.18219e-05	2999	3000	7.88485e-05
ASPSHWPL	GCTTCTCCTAGTCACTGGCCACTA	Pool 13	8296	8297	0.000203907	187	188	3.77336e-06	737	738	1.63629e-05	4819	4820	9.59538e-05	8171	8172	0.000208161	3715	5260	5261	0.000185189	8703	8704	0.000206666	567	568	1.32381e-05	244120	244121	0.00684182	2669	2670	5.80254e-05	4722	4723	0.000110112	7472	7473	0.000196412
ASPTFRRL	GCATCTCCGACATTCCGGCGTCTC	Pool 13	18360	18361	0.000451239	2936	2937	5.89487e-05	9102	9103	0.000201831	4174	4175	8.31135e-05	24476	24477	0.000623491	4681	10295	10296	0.000362422	20313	20314	0.000482332	3106	3107	7.24134e-05	5731	5732	0.000160647	8867	8868	0.000192722	13688	13689	0.000319145	21505	21506	0.000565239
ASQYSPML	GCGTCTCAGTACAGTCCGATGCTT	Pool 13	5958	5959	0.000146448	16659	16660	0.000334384	728	729	1.61633e-05	3375	3376	6.72075e-05	6837	6838	0.000174181	3486	3574	3575	0.000125841	6186	6187	0.000146903	862	863	2.01135e-05	278	279	7.81936e-06	3311	3312	7.19775e-05	8221	8222	0.000191687	2299	2300	6.04505e-05
ASRQFHAI	GCAAGCAGGCAGTTCCATGCGATA	Pool 13	4326	4327	0.00010634	93374	93375	0.00187414	14606	14607	0.000323865	1600	1601	3.18718e-05	28603	28604	0.000728616	4749	2596	2597	9.14152e-05	5334	5335	0.000126673	1631	1632	3.80363e-05	231	232	6.50212e-06	7333	7334	0.000159385	1164	1165	2.71608e-05	1988	1989	5.22766e-05
ASRVYYIM	GCCAGTCGGGTATATTACATCATG	Pool 13	3691	3692	9.07345e-05	144315	144316	0.00289657	822	823	1.82475e-05	20358	20359	0.000405295	3233	3234	8.23781e-05	2554	2349	2350	8.27207e-05	3901	3902	9.26483e-05	922	923	2.15119e-05	308	309	8.66015e-06	626	627	1.36262e-05	10397	10398	0.000242419	2165	2166	5.69286e-05
ASSAYHQL	GCCAGTTCTGCATACCATCAGCTC	Pool 13	14279	14280	0.000350945	8824	8825	0.000177127	12080	12081	0.000267859	10520	10521	0.000209446	7465	7466	0.000190178	3621	8004	8005	0.000281779	14622	14623	0.000347206	7669	7670	0.000178761	34810	34811	0.000975626	7342	7343	0.000159581	14180	14181	0.000330615	7242	7243	0.000190367
ASSFFAFL	GCCTCCAGTTTCTTTGCGTTCCTC	Pool 13	11594	11595	0.000284958	2695	2696	5.41116e-05	4434	4435	9.83325e-05	46615	46616	0.000928005	4008	4009	0.000102119	2807	8026	8027	0.000282553	11922	11923	0.000283097	7781	7782	0.000181371	2535	2536	7.10749e-05	16974	16975	0.000368907	12444	12445	0.000290142	4150	4151	0.0001091
ASSGYGSL	GCTTCATCCGGATACGGTTCGTTA	Pool 13	16537	16538	0.000406437	18043	18044	0.000362162	27054	27055	0.000599862	19339	19340	0.00038501	10664	10665	0.000271664	4030	9562	9563	0.000336621	17495	17496	0.000415422	16217	16218	0.000377985	6470	6471	0.000181359	5913	5914	0.000128525	17191	17192	0.000400814	4209	4210	0.000110651
ASSLFLMI	GCCTCGAGCTTATTCCTGATGATC	Pool 13	10474	10475	0.000257433	3857	3858	7.74341e-05	2331	2332	5.17049e-05	6304	6305	0.000125516	14926	14927	0.000380228	4346	6294	6295	0.000221586	10974	10975	0.000260588	8365	8366	0.000194982	1741	1742	4.88219e-05	3623	3624	7.8758e-05	8878	8879	0.000207005	2798	2799	7.35657e-05
ASSPFSTL	GCAAGTTCCCCGTTTTCCACGTTA	Pool 13	41397	41398	0.0010174	3195910	3195911	0.0641453	30804	30805	0.000683006	26439	26440	0.000526352	18097	18098	0.000461001	4488	27515	27516	0.000968572	42289	42290	0.00100413	16395	16396	0.000382134	67283	67284	0.00188573	62495	62496	0.00135818	24857	24858	0.000579539	26845	26846	0.000705589
ASSWLLHL	GCCTCTTCGTGGCTGCTGCATCTT	Pool 13	4689	4690	0.000115261	649	650	1.30462e-05	2679	2680	5.94208e-05	2764	2765	5.5044e-05	1533	1534	3.90748e-05	1771.5	2780	2781	9.78921e-05	4654	4655	0.000110527	9593	9594	0.000223603	30753	30754	0.000861923	6749	6750	0.000146693	1845	1846	4.30376e-05	95	96	2.52315e-06
ASTLLASL	GCCTCCACATTGTTGGCATCTCTC	Pool 13	1678	1679	4.1263e-05	724	725	1.45515e-05	5692	5693	0.000126225	838	839	1.67023e-05	3350	3351	8.53584e-05	2599	943	944	3.32291e-05	1690	1691	4.01508e-05	188	189	4.40493e-06	60	61	1.70961e-06	646	647	1.40608e-05	66	67	1.56204e-06	176	177	4.65206e-06
ASVVFEGV	GCTTCAGTTGTATTTGAGGGCGTC	Pool 13	3059	3060	7.52024e-05	399	400	8.02842e-06	630	631	1.39905e-05	3938	3939	7.84153e-05	1071	1072	2.73065e-05	1425.5	2640	2641	9.2964e-05	3426	3427	8.137e-05	17	18	4.19517e-07	5	6	1.68158e-07	508	509	1.10618e-05	1348	1349	3.14505e-05	748	749	1.96859e-05
ASWACGSL	GCAAGCTGGGCCTGCGGCAGCTTG	Pool 13	378	379	9.31429e-06	NA	1	2.00711e-08	NA	1	2.21719e-08	NA	1	1.99074e-08	NA	1	2.54725e-08	64	328	329	1.15809e-05	456	457	1.08509e-05	NA	1	2.33065e-08	NA	1	2.80264e-08	NA	1	2.17323e-08	NA	1	2.3314e-08	NA	1	2.62828e-08
ASWFSGAL	GCCTCCTGGTTCTCAGGTGCATTA	Pool 13	2703	2704	6.64534e-05	182	183	3.673e-06	1476	1477	3.27479e-05	477	478	9.51575e-06	797	798	2.03271e-05	1223	1744	1745	6.14245e-05	2762	2763	6.56041e-05	199	200	4.66131e-06	1265	1266	3.54814e-05	1168	1169	2.54051e-05	3498	3499	8.15756e-05	390	391	1.02766e-05
ASWHKLGL	GCATCTTGGCACAAGCTTGGGTTG	Pool 13	9551	9552	0.00023475	441	442	8.87141e-06	8544	8545	0.000189459	24063	24064	0.000479052	8745	8746	0.000222783	3788	5242	5243	0.000184555	9007	9008	0.000213884	2095	2096	4.88505e-05	28399	28400	0.000795949	5697	5698	0.000123831	3084	3085	7.19236e-05	7199	7200	0.000189236
ASWLFKNA	GCCTCCTGGCTCTTTAAGAATGCA	Pool 13	5116	5117	0.000125755	2951	2952	5.92498e-05	3479	3480	7.71583e-05	1621	1622	3.22898e-05	1189	1190	3.03123e-05	1514	2705	2706	9.5252e-05	4222	4223	0.00010027	3582	3583	8.35073e-05	614	615	1.72362e-05	766	767	1.66687e-05	505	506	1.17969e-05	1026	1027	2.69925e-05
ASWTCASV	GCGTCCTGGACCTGTGCCTCAGTC	Pool 13	NA	1	2.4576e-08	NA	1	2.00711e-08	NA	1	2.21719e-08	NA	1	1.99074e-08	NA	1	2.54725e-08	64	NA	1	3.52003e-08	NA	1	2.37438e-08	NA	1	2.33065e-08	NA	1	2.80264e-08	NA	1	2.17323e-08	NA	1	2.3314e-08	NA	1	2.62828e-08
ASWTLEEL	GCCAGTTGGACTCTAGAAGAATTA	Pool 13	801	802	1.97099e-05	3	4	8.02842e-08	253	254	5.63167e-06	136	137	2.72732e-06	223	224	5.70584e-06	637	330	331	1.16513e-05	816	817	1.93987e-05	1485	1486	3.46335e-05	2	3	8.40791e-08	283	284	6.17199e-06	265	266	6.20151e-06	73	74	1.94493e-06
ASWVLRSL	GCAAGCTGGGTCCTACGCTCCTTG	Pool 13	4211	4212	0.000103514	77	78	1.56554e-06	124	125	2.77149e-06	7	8	1.59259e-07	1429	1430	3.64257e-05	1712.5	1760	1761	6.19878e-05	2994	2995	7.11127e-05	45	46	1.0721e-06	4	5	1.40132e-07	1595	1596	3.46848e-05	304	305	7.11076e-06	29	30	7.88485e-07
ASYFIRNM	GCTAGTTATTTTATTCGAAATATG	Pool 13	18324	18325	0.000450355	2960	2961	5.94304e-05	13395	13396	0.000297015	34462	34463	0.00068607	31237	31238	0.00079571	4792	12068	12069	0.000424833	17879	17880	0.000424539	41227	41228	0.000960881	8860	8861	0.000248342	41486	41487	0.00090161	11488	11489	0.000267854	12722	12723	0.000334397
ASYGHVDV	GCGTCGTATGGTCATGTCGATGTT	Pool 13	7796	7797	0.000191619	2192	2193	4.40158e-05	2149	2150	4.76696e-05	471441	471442	0.0093852	92652	92653	0.0023601	4981	4070	4071	0.0001433	8256	8257	0.000196053	11433	11434	0.000266487	1095	1096	3.07169e-05	67765	67766	0.00147271	807	808	1.88377e-05	10206	10207	0.000268269
ASYGQSGL	GCGTCCTACGGACAGAGTGGCCTC	Pool 13	NA	1	2.4576e-08	NA	1	2.00711e-08	NA	1	2.21719e-08	1	2	3.98148e-08	NA	1	2.54725e-08	64	NA	1	3.52003e-08	NA	1	2.37438e-08	NA	1	2.33065e-08	NA	1	2.80264e-08	NA	1	2.17323e-08	NA	1	2.3314e-08	NA	1	2.62828e-08
ASYIRIAM	GCAAGTTATATTAGAATTGCAATG	Pool 13	5837	5838	0.000143474	3925	3926	7.8799e-05	1857	1858	4.11954e-05	534	535	1.06505e-05	583	584	1.48759e-05	1043	3197	3198	0.000112571	5808	5809	0.000137928	280	281	6.54913e-06	937	938	2.62887e-05	163	164	3.5641e-06	58	59	1.37552e-06	6592	6593	0.000173283
ASYIRIVM	GCCAGCTACATCCGTATTGTAATG	Pool 13	2691	2692	6.61585e-05	584	585	1.17416e-05	739	740	1.64072e-05	1891	1892	3.76648e-05	268	269	6.85211e-06	692.5	1882	1883	6.62822e-05	3137	3138	7.45081e-05	11	12	2.79678e-07	56	57	1.5975e-06	555	556	1.20832e-05	4809	4810	0.00011214	376	377	9.90863e-06
ASYKDVLL	GCTAGCTATAAAGATGTTCTTTTA	Pool 13	7356	7357	0.000180805	3562	3563	7.15132e-05	1920	1921	4.25923e-05	3905	3906	7.77584e-05	9240	9241	0.000235391	3860	4157	4158	0.000146363	7539	7540	0.000179028	5747	5748	0.000133966	256	257	7.20278e-06	3892	3893	8.4604e-05	25374	25375	0.000591592	4609	4610	0.000121164
ASYLLKPI	GCTAGTTACTTGCTAAAACCGATC	Pool 13	6814	6815	0.000167485	4635	4636	9.30494e-05	440	441	9.77782e-06	3529	3530	7.02732e-05	38791	38792	0.00098813	4863	4483	4484	0.000157838	7301	7302	0.000173377	7963	7964	0.000185613	348	349	9.7812e-06	2154	2155	4.68332e-05	5304	5305	0.000123681	1155	1156	3.0383e-05
ASYLQNLL	GCATCCTACCTTCAAAACCTGTTA	Pool 13	16497	16498	0.000405454	2487	2488	4.99368e-05	6800	6801	0.000150791	12735	12736	0.000253541	10926	10927	0.000278338	4052	10178	10179	0.000358304	17251	17252	0.000409628	7472	7473	0.00017417	3980	3981	0.000111573	6229	6230	0.000135392	29848	29849	0.000695899	6972	6973	0.00018327
ASYLSWRL	GCAAGTTATTTATCATGGCGGCTA	Pool 13	19237	19238	0.000472792	1019	1020	2.04725e-05	23246	23247	0.000515431	23728	23729	0.000472383	8400	8401	0.000213995	3748	10848	10849	0.000381888	19088	19089	0.000453245	19497	19498	0.000454431	1209	1210	3.39119e-05	6502	6503	0.000141325	9093	9094	0.000212017	4598	4599	0.000120875
ATAIFLIL	GCCACGGCGATCTTCTTAATCCTA	Pool 13	35105	35106	0.000862764	163623	163624	0.00328411	48974	48975	0.00108587	44649	44650	0.000888867	43673	43674	0.00111249	4898	21071	21072	0.000741741	39564	39565	0.000939424	53085	53086	0.00123725	8066	8067	0.000226089	49363	49364	0.0010728	81433	81434	0.00189855	12164	12165	0.000319731
ATFELIEL	GCAACATTTGAGCTAATCGAACTA	Pool 13	1183	1184	2.90979e-05	674	675	1.3548e-05	669	670	1.48552e-05	1521	1522	3.02991e-05	2220	2221	5.65744e-05	2131.5	538	539	1.8973e-05	1280	1281	3.04158e-05	3	4	9.32261e-08	134	135	3.78356e-06	9	10	2.17323e-07	3	4	9.32559e-08	20	21	5.5194e-07
ATFFLTCI	GCGACGTTCTTCTTGACATGTATT	Pool 13	20052	20053	0.000492822	1380	1381	2.77181e-05	8460	8461	0.000187597	16266	16267	0.000323834	17826	17827	0.000454098	4475	14298	14299	0.000503329	23229	23230	0.000551569	11326	11327	0.000263993	6679	6680	0.000187216	17401	17402	0.000378186	24557	24558	0.000572544	10026	10027	0.000263538
ATFIREVL	GCAACGTTTATCCGTGAGGTCCTT	Pool 13	4503	4504	0.00011069	131	132	2.64938e-06	4635	4636	0.000102789	2702	2703	5.38098e-05	2835	2836	7.224e-05	2403	3019	3020	0.000106305	5484	5485	0.000130235	3289	3290	7.66785e-05	436	437	1.22475e-05	427	428	9.30144e-06	414	415	9.6753e-06	3359	3360	8.83104e-05
ATFQFTFC	GCTACATTTCAGTTTACATTTTGT	Pool 13	32890	32891	0.000808328	19077	19078	0.000382916	51510	51511	0.0011421	23883	23884	0.000475469	31333	31334	0.000798156	4795	20458	20459	0.000720163	33668	33669	0.00079943	58328	58329	0.00135945	29445	29446	0.000825264	50642	50643	0.00110059	87887	87888	0.00204902	20003	20004	0.000525762
ATFQINPF	GCGACATTCCAGATTAACCCATTC	Pool 13	14749	14750	0.000362495	1294	1295	2.5992e-05	4362	4363	9.67361e-05	5298	5299	0.000105489	16386	16387	0.000417418	4412	9307	9308	0.000327645	16610	16611	0.000394408	22866	22867	0.00053295	599	600	1.68158e-05	29396	29397	0.000638866	21472	21473	0.000500621	3894	3895	0.000102372
ATFWFCTW	GCGACGTTTTGGTTCTGTACCTGG	Pool 13	3532	3533	8.68269e-05	17609	17610	0.000353451	2780	2781	6.16601e-05	957	958	1.90713e-05	2492	2493	6.3503e-05	2260	2403	2404	8.46216e-05	3591	3592	8.52877e-05	4213	4214	9.82137e-05	63306	63307	0.00177427	3582	3583	7.7867e-05	6720	6721	0.000156693	83	84	2.20776e-06
ATHEYRTL	GCGACACACGAGTACAGAACCTTG	Pool 13	2317	2318	5.69671e-05	NA	1	2.00711e-08	281	282	6.25248e-06	24	25	4.97686e-07	2784	2785	7.09409e-05	2390	1317	1318	4.6394e-05	2668	2669	6.33722e-05	30	31	7.22502e-07	4	5	1.40132e-07	1410	1411	3.06643e-05	286	287	6.69111e-06	182	183	4.80976e-06
ATHPLFSL	GCCACACACCCTCTCTTTAGCCTC	Pool 13	187	188	4.62028e-06	NA	1	2.00711e-08	NA	1	2.21719e-08	833	834	1.66028e-05	NA	1	2.54725e-08	64	121	122	4.29444e-06	280	281	6.67201e-06	NA	1	2.33065e-08	NA	1	2.80264e-08	32	33	7.17167e-07	2	3	6.99419e-08	NA	1	2.62828e-08
ATIAFHQM	GCCACGATTGCATTTCATCAGATG	Pool 13	5997	5998	0.000147407	4189	4190	8.40977e-05	1762	1763	3.90891e-05	1689	1690	3.36435e-05	2562	2563	6.5286e-05	2291	3595	3596	0.00012658	6760	6761	0.000160532	804	805	1.87618e-05	2655	2656	7.4438e-05	10506	10507	0.000228342	9289	9290	0.000216587	2967	2968	7.80075e-05
ATIFFTRL	GCGACTATATTCTTTACTCGGTTA	Pool 13	7447	7448	0.000183042	2240	2241	4.49792e-05	9081	9082	0.000201365	7445	7446	0.000148231	4686	4687	0.00011939	3002	5119	5120	0.000180226	9308	9309	0.000221031	3707	3708	8.64206e-05	77	78	2.18606e-06	4833	4834	0.000105054	28986	28987	0.000675802	2103	2104	5.52991e-05
ATKAFHTL	GCCACTAAGGCCTTCCATACTCTT	Pool 13	599	600	1.47456e-05	8	9	1.8064e-07	34	35	7.76017e-07	NA	1	1.99074e-08	142	143	3.64257e-06	539	371	372	1.30945e-05	467	468	1.11121e-05	2056	2057	4.79415e-05	3	4	1.12105e-07	NA	1	2.17323e-08	275	276	6.43465e-06	14	15	3.94243e-07
ATLDYMHL	GCTACATTGGACTACATGCACCTG	Pool 13	11595	11596	0.000284983	14760	14761	0.000296269	17151	17152	0.000380293	3695	3696	7.35778e-05	2879	2880	7.33608e-05	2420	6847	6848	0.000241052	11771	11772	0.000279512	5544	5545	0.000129235	1097	1098	3.0773e-05	5761	5762	0.000125222	34078	34079	0.000794517	24173	24174	0.000635362
ATMLHVEL	GCTACAATGCTCCATGTAGAGTTA	Pool 13	12855	12856	0.000315949	25591	25592	0.000513659	4415	4416	9.79112e-05	16737	16738	0.00033321	10373	10374	0.000264252	4000	7297	7298	0.000256892	13718	13719	0.000325741	1847	1848	4.30705e-05	318	319	8.94041e-06	1964	1965	4.27041e-05	30302	30303	0.000706483	1846	1847	4.85444e-05
ATPEWAAL	GCAACTCCAGAGTGGGCCGCGTTA	Pool 13	3443	3444	8.46396e-05	95	96	1.92682e-06	4984	4985	0.000110527	526	527	1.04912e-05	6227	6228	0.000158643	3358.5	1972	1973	6.94502e-05	3793	3794	9.0084e-05	212	213	4.96429e-06	11	12	3.36316e-07	4752	4753	0.000103294	2781	2782	6.48595e-05	3778	3779	9.93229e-05
ATPRMIGL	GCTACACCACGTATGATCGGTTTG	Pool 13	9567	9568	0.000235143	1742	1743	3.49839e-05	10963	10964	0.000243093	13455	13456	0.000267874	421	422	1.07494e-05	872	6001	6002	0.000211272	9901	9902	0.000235111	7843	7844	0.000182816	149	150	4.20396e-06	11775	11776	0.00025592	15022	15023	0.000350246	7157	7158	0.000188133
ATPWFVTI	GCGACCCCGTGGTTTGTGACCATT	Pool 13	7468	7469	0.000183558	21864	21865	0.000438854	4713	4714	0.000104518	25229	25230	0.000502264	11240	11241	0.000286336	4093	4658	4659	0.000163998	8944	8945	0.000212388	225	226	5.26727e-06	6081	6082	0.000170456	1782	1783	3.87488e-05	6775	6776	0.000157975	1077	1078	2.83329e-05
ATTYFTRL	GCGACCACTTATTTTACACGGCTG	Pool 13	2317	2318	5.69671e-05	64	65	1.30462e-06	181	182	4.03529e-06	2839	2840	5.65371e-05	3593	3594	9.15482e-05	2672	1142	1143	4.0234e-05	2398	2399	5.69614e-05	3270	3271	7.62356e-05	6	7	1.96185e-07	440	441	9.58396e-06	1	2	4.66279e-08	1461	1462	3.84255e-05
ATVIRSPL	GCAACGGTCATACGGAGCCCGCTA	Pool 13	8248	8249	0.000202727	2004	2005	4.02425e-05	16267	16268	0.000360693	14284	14285	0.000284378	5287	5288	0.000134699	3139	4244	4245	0.000149425	7661	7662	0.000181925	7775	7776	0.000181232	32	33	9.2487e-07	4335	4336	9.42314e-05	21503	21504	0.000501344	461	462	1.21427e-05
ATWRQIML	GCTACCTGGCGTCAGATAATGCTT	Pool 13	5546	5547	0.000136323	2305	2306	4.62839e-05	8790	8791	0.000194913	15238	15239	0.000303369	17240	17241	0.000439172	4459	3365	3366	0.000118484	6590	6591	0.000156495	524	525	1.22359e-05	448	449	1.25838e-05	6576	6577	0.000142934	5106	5107	0.000119064	6764	6765	0.000177803
ATWSQTSL	GCGACATGGTCTCAAACAAGCCTC	Pool 13	903	904	2.22167e-05	160	161	3.23144e-06	271	272	6.03076e-06	6	7	1.39352e-07	14502	14503	0.000369428	4330	478	479	1.6861e-05	549	550	1.30591e-05	10955	10956	0.000255346	585	586	1.64235e-05	4	5	1.08662e-07	12	13	3.03082e-07	212	213	5.59825e-06
ATYRRLCL	GCCACCTATAGGAGGCTCTGCTTG	Pool 13	9295	9296	0.000228458	3524	3525	7.07505e-05	14967	14968	0.000331869	3547	3548	7.06315e-05	1235	1236	3.1484e-05	1557	5396	5397	0.000189976	9456	9457	0.000224545	2643	2644	6.16225e-05	6554	6555	0.000183713	3800	3801	8.26046e-05	15201	15202	0.000354419	10986	10987	0.00028877
ATYSFCAF	GCAACATATTCCTTCTGCGCATTT	Pool 13	4110	4111	0.000101032	1406	1407	2.824e-05	342	343	7.60497e-06	941	942	1.87528e-05	128	129	3.28595e-06	516.5	2257	2258	7.94823e-05	4255	4256	0.000101054	6327	6328	0.000147484	19796	19797	0.000554838	9484	9485	0.000206131	4	5	1.1657e-07	89	90	2.36546e-06
ATYTERAL	GCTACCTATACGGAGCGTGCACTG	Pool 13	10186	10187	0.000250355	1033	1034	2.07535e-05	947	948	2.1019e-05	1217	1218	2.42472e-05	17002	17003	0.000433109	4443	5026	5027	0.000176952	8916	8917	0.000211723	5851	5852	0.00013639	2887	2888	8.09402e-05	3281	3282	7.13255e-05	1091	1092	2.54589e-05	1742	1743	4.5811e-05
ATYYFTTF	GCCACATATTATTTTACGACTTTT	Pool 13	7227	7228	0.000177635	7835	7836	0.000157277	20140	20141	0.000446565	3385	3386	6.74065e-05	6455	6456	0.000164451	3411.5	4781	4782	0.000168328	7841	7842	0.000186199	3721	3722	8.67469e-05	7209	7210	0.00020207	3121	3122	6.78484e-05	8989	8990	0.000209593	1239	1240	3.25907e-05
ATYYGAFI	GCGACGTATTACGGGGCGTTTATT	Pool 13	2719	2720	6.68466e-05	370	371	7.44636e-06	6261	6262	0.000138841	6	7	1.39352e-07	2952	2953	7.52203e-05	2445	1566	1567	5.51589e-05	2991	2992	7.10415e-05	7509	7510	0.000175032	15	16	4.48422e-07	15934	15935	0.000346305	1706	1707	3.97969e-05	3475	3476	9.13592e-05
AVDLYSML	GCTGTAGACCTTTATTCGATGTTG	Pool 13	6929	6930	0.000170311	1304	1305	2.61927e-05	45029	45030	0.000998402	3747	3748	7.4613e-05	3080	3081	7.84808e-05	2506	5008	5009	0.000176318	7325	7326	0.000173947	991	992	2.31201e-05	78	79	2.21408e-06	16046	16047	0.000348739	12146	12147	0.000283195	5243	5244	0.000137827
AVEEFHNL	GCGGTGGAGGAATTTCACAACCTC	Pool 13	6945	6946	0.000170705	6487	6488	0.000130221	5788	5789	0.000128353	6805	6806	0.00013549	5341	5342	0.000136074	3156	3931	3932	0.000138408	6600	6601	0.000156733	15712	15713	0.000366215	1760	1761	4.93544e-05	1043	1044	2.26886e-05	6895	6896	0.000160773	1520	1521	3.99762e-05
AVFAATGI	GCTGTATTCGCCGCTACTGGTATT	Pool 13	8978	8979	0.000220668	316	317	6.36253e-06	29550	29551	0.000655203	7027	7028	0.000139909	2837	2838	7.2291e-05	2404	4956	4957	0.000174488	9140	9141	0.000217042	2319	2320	5.40711e-05	2116	2117	5.93318e-05	1424	1425	3.09686e-05	10993	10994	0.000256314	7296	7297	0.000191786
AVFFFIYL	GCTGTTTTCTTCTTTATCTATTTA	Pool 13	23608	23609	0.000580214	17688	17689	0.000355037	35280	35281	0.000782248	9118	9119	0.000181536	6901	6902	0.000175811	3504	18431	18432	0.000648812	26173	26174	0.00062147	14937	14938	0.000348153	33305	33306	0.000933446	23471	23472	0.000510102	13310	13311	0.000310332	12869	12870	0.00033826
AVFIRASV	GCTGTTTTCATACGAGCCTCGGTT	Pool 13	2511	2512	6.17348e-05	4251	4252	8.53421e-05	123	124	2.74932e-06	3506	3507	6.98153e-05	3037	3038	7.73855e-05	2480.5	1598	1599	5.62853e-05	2401	2402	5.70326e-05	1739	1740	4.05534e-05	59	60	1.68158e-06	53	54	1.17355e-06	16493	16494	0.000384541	183	184	4.83604e-06
AVFLGAEI	GCGGTGTTCCTTGGCGCGGAAATC	Pool 13	23104	23105	0.000567828	10701	10702	0.0002148	12753	12754	0.000282781	12852	12853	0.00025587	16402	16403	0.000417826	4414	13088	13089	0.000460737	22670	22671	0.000538296	14671	14672	0.000341953	7305	7306	0.000204761	4433	4434	9.63612e-05	18849	18850	0.000439468	12973	12974	0.000340994
AVFLIALV	GCCGTATTTCTTATAGCTTTAGTC	Pool 13	11683	11684	0.000287146	2132	2133	4.28116e-05	8740	8741	0.000193805	6588	6589	0.00013117	3913	3914	9.96994e-05	2774	7214	7215	0.00025397	12484	12485	0.000296441	2514	2515	5.86159e-05	29050	29051	0.000814194	9640	9641	0.000209522	7012	7013	0.000163501	6379	6380	0.000167685
AVFLLRLM	GCTGTCTTTCTATTAAGGCTGATG	Pool 13	18518	18519	0.000455122	1841	1842	3.69709e-05	39192	39193	0.000868984	561280	561281	0.0111737	10555	10556	0.000268888	4019	13631	13632	0.000479851	19919	19920	0.000472977	6290	6291	0.000146621	2420	2421	6.78518e-05	36855	36856	0.000800967	45495	45496	0.00106069	10622	10623	0.000279203
AVFLVGVL	GCAGTGTTCCTTGTAGGGGTCTTA	Pool 13	12660	12661	0.000311156	101977	101978	0.00204681	7361	7362	0.00016323	9094	9095	0.000181058	5666	5667	0.000144353	3243	7161	7162	0.000252105	11836	11837	0.000281055	1556	1557	3.62883e-05	3322	3323	9.31316e-05	4832	4833	0.000105032	130696	130697	0.00304707	8377	8378	0.000220198
AVFRVGSV	GCAGTGTTTAGGGTGGGGTCAGTC	Pool 13	5318	5319	0.00013072	117	118	2.36838e-06	328	329	7.29456e-06	5429	5430	0.000108097	819	820	2.08875e-05	1238	3626	3627	0.000127672	5437	5438	0.000129119	291	292	6.80551e-06	60	61	1.70961e-06	365	366	7.95404e-06	200	201	4.68611e-06	1647	1648	4.33141e-05
AVFVKNEL	GCCGTCTTCGTAAAGAACGAATTA	Pool 13	3316	3317	8.15185e-05	2495	2496	5.00974e-05	27	28	6.20814e-07	439	440	8.75927e-06	352	353	8.9918e-06	795	1456	1457	5.12869e-05	2926	2927	6.94981e-05	2343	2344	5.46305e-05	7	8	2.24211e-07	21103	21104	0.000458639	125	126	2.93756e-06	2632	2633	6.92027e-05
AVFVLTGL	GCGGTTTTCGTACTGACGGGATTG	Pool 13	10116	10117	0.000248635	362	363	7.28579e-06	16617	16618	0.000368453	2467	2468	4.91315e-05	5618	5619	0.00014313	3231	6429	6430	0.000226338	9379	9380	0.000222717	5441	5442	0.000126834	32	33	9.2487e-07	4645	4646	0.000100968	2785	2786	6.49527e-05	4038	4039	0.000106156
AVFWHSSA	GCGGTCTTCTGGCACTCTTCTGCT	Pool 13	52057	52058	0.00127938	76450	76451	0.00153445	40244	40245	0.000892309	72165	72166	0.00143664	54563	54564	0.00138988	4934	27896	27897	0.000981983	47974	47975	0.00113911	56038	56039	0.00130607	33205	33206	0.000930644	36125	36126	0.000785103	24390	24391	0.000568651	28819	28820	0.000757472
AVFYAACV	GCTGTGTTCTATGCAGCATGCGTG	Pool 13	5140	5141	0.000126345	270	271	5.43926e-06	2186	2187	4.849e-05	1145	1146	2.28139e-05	446	447	1.13862e-05	904	3243	3244	0.00011419	4834	4835	0.000114801	2310	2311	5.38614e-05	130	131	3.67145e-06	66	67	1.45607e-06	606	607	1.41516e-05	3847	3848	0.000101136
AVFYICIL	GCCGTGTTCTACATTTGTATCCTC	Pool 13	10199	10200	0.000250675	5277	5278	0.000105935	10320	10321	0.000228836	30383	30384	0.000604867	12998	12999	0.000331117	4226	6362	6363	0.00022398	10481	10482	0.000248883	55336	55337	0.00128971	8013	8014	0.000224603	32139	32140	0.000698477	25204	25205	0.000587629	2414	2415	6.34731e-05
AVFYIPMF	GCTGTTTTCTACATTCCGATGTTT	Pool 13	33484	33485	0.000822926	7683	7684	0.000154226	29011	29012	0.000643252	24017	24018	0.000478137	35257	35258	0.00089811	4836	23741	23742	0.000835726	37870	37871	0.000899202	42596	42597	0.000992788	38641	38642	0.00108299	51178	51179	0.00111224	5482	5483	0.00012783	21304	21305	0.000559956
AVGFFISL	GCGGTAGGTTTCTTCATATCGCTT	Pool 13	17319	17320	0.000425656	3776	3777	7.58084e-05	25633	25634	0.000568355	9733	9734	0.000193779	10310	10311	0.000262647	3992	10793	10794	0.000379952	17983	17984	0.000427009	2848	2849	6.64003e-05	5279	5280	0.000147979	5054	5055	0.000109857	6840	6841	0.000159491	4268	4269	0.000112201
AVGWFHSL	GCCGTCGGATGGTTCCACTCTTTG	Pool 13	9828	9829	0.000241557	705	706	1.41702e-05	3659	3660	8.11493e-05	3830	3831	7.62653e-05	10980	10981	0.000279714	4059	5588	5589	0.000196735	10400	10401	0.000246959	3668	3669	8.55116e-05	1815	1816	5.08959e-05	23069	23070	0.000501365	6100	6101	0.000142239	3884	3885	0.000102109
AVHFFTGM	GCTGTACACTTCTTTACAGGTATG	Pool 13	67877	67878	0.00166817	14527	14528	0.000291592	33659	33660	0.000746307	39689	39690	0.000790126	22824	22825	0.00058141	4641	40720	40721	0.00143339	69316	69317	0.00164585	31849	31850	0.000742313	750	751	2.10478e-05	96362	96363	0.00209419	27322	27323	0.000637007	85180	85181	0.0022388
AVHLFALL	GCCGTCCATTTGTTCGCTCTACTC	Pool 13	9751	9752	0.000239665	14515	14516	0.000291351	4423	4424	9.80886e-05	2962	2963	5.89857e-05	5779	5780	0.000147231	3258	6690	6691	0.000235525	9668	9669	0.000229579	3319	3320	7.73777e-05	1711	1712	4.79811e-05	8577	8578	0.00018642	6330	6331	0.000147601	12378	12379	0.000325355
AVHLFVLV	GCAGTGCATTTGTTTGTGCTGGTA	Pool 13	8269	8270	0.000203243	12178	12179	0.000244445	4930	4931	0.00010933	2215	2216	4.41149e-05	84555	84556	0.00215385	4976	4099	4100	0.000144321	8230	8231	0.000195435	2746	2747	6.4023e-05	3955	3956	0.000110872	2237	2238	4.8637e-05	324	325	7.57704e-06	34144	34145	0.000897428
AVHWVATL	GCAGTTCATTGGGTAGCTACCCTT	Pool 13	4977	4978	0.000122339	1221	1222	2.45268e-05	717	718	1.59194e-05	398	399	7.94306e-06	9341	9342	0.000237964	3877	2907	2908	0.000102363	4714	4715	0.000111952	2406	2407	5.60988e-05	105	106	2.97079e-06	1224	1225	2.66221e-05	5770	5771	0.000134545	9522	9523	0.000250292
AVHYVSGL	GCGGTGCACTACGTGTCGGGACTA	Pool 13	3142	3143	7.72423e-05	17	18	3.61279e-07	516	517	1.14629e-05	2526	2527	5.03061e-05	493	494	1.25834e-05	951.5	1889	1890	6.65286e-05	2979	2980	7.07565e-05	5	6	1.39839e-07	16	17	4.76448e-07	2622	2623	5.70039e-05	6	7	1.63198e-07	482	483	1.26946e-05
AVICFFSV	GCCGTAATCTGCTTCTTTTCAGTT	Pool 13	16475	16476	0.000404914	3851	3852	7.73137e-05	9157	9158	0.000203051	8437	8438	0.000167979	7476	7477	0.000190458	3623	9520	9521	0.000335142	15911	15912	0.000377811	3392	3393	7.9079e-05	3912	3913	0.000109667	9294	9295	0.000202002	9923	9924	0.000231368	8876	8877	0.000233313
AVIGFGVL	GCCGTGATCGGGTTTGGGGTCCTT	Pool 13	4979	4980	0.000122388	1085	1086	2.17972e-05	1112	1113	2.46774e-05	5241	5242	0.000104355	1822	1823	4.64364e-05	1935	2080	2081	7.32519e-05	5457	5458	0.000129594	3611	3612	8.41832e-05	3618	3619	0.000101427	9416	9417	0.000204653	25406	25407	0.000592338	1024	1025	2.69399e-05
AVILLPRL	GCCGTAATCCTTTTGCCAAGACTG	Pool 13	11602	11603	0.000285155	1459	1460	2.93037e-05	1286	1287	2.85353e-05	5101	5102	0.000101568	6638	6639	0.000169112	3449	6966	6967	0.000245241	12299	12300	0.000292049	9797	9798	0.000228357	4979	4980	0.000139571	7126	7127	0.000154886	3151	3152	7.34856e-05	2865	2866	7.53266e-05
AVLLYEYV	GCGGTATTATTATATGAATACGTT	Pool 13	7548	7549	0.000185524	898	899	1.80439e-05	1878	1879	4.16611e-05	4257	4258	8.47658e-05	2271	2272	5.78735e-05	2157	4741	4742	0.00016692	7703	7704	0.000182922	12027	12028	0.000280331	226	227	6.36199e-06	3967	3968	8.62339e-05	1282	1283	2.99118e-05	16834	16835	0.000442472
AVLRYTKL	GCCGTCTTACGTTATACGAAATTA	Pool 13	3742	3743	9.19878e-05	1747	1748	3.50842e-05	26513	26514	0.000587866	618	619	1.23227e-05	1736	1737	4.42457e-05	1878	2009	2010	7.07526e-05	3606	3607	8.56439e-05	6017	6018	0.000140259	206	207	5.80146e-06	3242	3243	7.0478e-05	8600	8601	0.000200523	1096	1097	2.88323e-05
AVLTCVPL	GCTGTCCTTACGTGTGTTCCTCTG	Pool 13	2361	2362	5.80484e-05	9507	9508	0.000190836	2991	2992	6.63384e-05	157	158	3.14537e-06	559	560	1.42646e-05	1015.5	1738	1739	6.12133e-05	3387	3388	8.0444e-05	97	98	2.28404e-06	27	28	7.84738e-07	2108	2109	4.58335e-05	59	60	1.39884e-06	1481	1482	3.89512e-05
AVLTFRRL	GCCGTTCTAACGTTCAGACGGCTG	Pool 13	1418	1419	3.48733e-05	201	202	4.05435e-06	473	474	1.05095e-05	66	67	1.3338e-06	366	367	9.34841e-06	811.5	960	961	3.38275e-05	1591	1592	3.78001e-05	5684	5685	0.000132498	43	44	1.23316e-06	59	60	1.30394e-06	242	243	5.66529e-06	2474	2475	6.505e-05
AVMMWASL	GCGGTAATGATGTGGGCGTCGCTT	Pool 13	8888	8889	0.000218456	2206	2207	4.42968e-05	3795	3796	8.41646e-05	5744	5745	0.000114368	5182	5183	0.000132024	3110	5975	5976	0.000210357	8323	8324	0.000197643	349	350	8.15728e-06	77	78	2.18606e-06	171	172	3.73796e-06	11961	11962	0.000278882	5633	5634	0.000148078
AVMVFALV	GCTGTGATGGTATTCGCTTTGGTG	Pool 13	8776	8777	0.000215703	602	603	1.21028e-05	46673	46674	0.00103485	4205	4206	8.37306e-05	5127	5128	0.000130623	3097	5849	5850	0.000205922	9240	9241	0.000219416	7891	7892	0.000183935	1890	1891	5.29979e-05	3784	3785	8.22569e-05	678	679	1.58302e-05	2099	2100	5.5194e-05
AVMWSHLL	GCAGTCATGTGGTCTCACTTACTA	Pool 13	8873	8874	0.000218087	3377	3378	6.78e-05	5337	5338	0.000118354	2105	2106	4.1925e-05	2641	2642	6.72984e-05	2329	4440	4441	0.000156325	8288	8289	0.000196812	3681	3682	8.58146e-05	10421	10422	0.000292091	2177	2178	4.7333e-05	893	894	2.08427e-05	2601	2602	6.8388e-05
AVNFFGTV	GCTGTTAACTTCTTTGGGACAGTT	Pool 13	7514	7515	0.000184688	3741	3742	7.51059e-05	450	451	9.99954e-06	3980	3981	7.92515e-05	5029	5030	0.000128127	3077	5045	5046	0.000177621	6955	6956	0.000165162	2028	2029	4.72889e-05	2142	2143	6.00605e-05	2676	2677	5.81775e-05	481	482	1.12373e-05	1965	1966	5.16721e-05
AVNMFRTL	GCGGTAAATATGTTTCGTACACTA	Pool 13	7961	7962	0.000195674	658	659	1.32268e-05	9951	9952	0.000220655	34558	34559	0.000687981	2505	2506	6.38341e-05	2265	4675	4676	0.000164597	6851	6852	0.000162693	2854	2855	6.65401e-05	543	544	1.52463e-05	783	784	1.70382e-05	30129	30130	0.00070245	1260	1261	3.31427e-05
AVNYFTNI	GCGGTTAACTATTTTACAAATATT	Pool 13	8542	8543	0.000209952	11180	11181	0.000224414	5798	5799	0.000128575	6888	6889	0.000137142	8674	8675	0.000220974	3774	5311	5312	0.000186984	8961	8962	0.000212792	1547	1548	3.60785e-05	12370	12371	0.000346714	9536	9537	0.000207261	1613	1614	3.76287e-05	3667	3668	9.64055e-05
AVPGYLSL	GCCGTACCAGGATACCTTTCGTTA	Pool 13	5837	5838	0.000143474	692	693	1.39092e-05	2378	2379	5.2747e-05	2447	2448	4.87334e-05	4111	4112	0.000104743	2833	3125	3126	0.000110036	5787	5788	0.000137429	2098	2099	4.89204e-05	120	121	3.39119e-06	203	204	4.4334e-06	1017	1018	2.37336e-05	3311	3312	8.70488e-05
AVPVFDLL	GCGGTGCCTGTATTTGACTTATTG	Pool 13	6086	6087	0.000149594	911	912	1.83048e-05	4562	4563	0.000101171	1765	1766	3.51565e-05	1510	1511	3.8489e-05	1758	3776	3777	0.000132952	6529	6530	0.000155047	5632	5633	0.000131286	29	30	8.40791e-07	4259	4260	9.25798e-05	1734	1735	4.04497e-05	841	842	2.21302e-05
AVQAFVFL	GCCGTCCAAGCCTTTGTCTTTCTG	Pool 13	13609	13610	0.000334479	1891	1892	3.79744e-05	16910	16911	0.000374949	7603	7604	0.000151376	15412	15413	0.000392608	4371	8342	8343	0.000293676	14668	14669	0.000348298	28244	28245	0.000658293	21674	21675	0.000607472	10248	10249	0.000222735	4993	4994	0.00011643	2083	2084	5.47735e-05
AVQFVSSL	GCTGTTCAGTTTGTTTCTAGCCTG	Pool 13	7247	7248	0.000178127	610	611	1.22634e-05	9134	9135	0.000202541	5285	5286	0.000105231	3317	3318	8.45178e-05	2587.5	3812	3813	0.000134219	8215	8216	0.000195079	12094	12095	0.000281892	2214	2215	6.20784e-05	100122	100123	0.00217591	659	660	1.53872e-05	5036	5037	0.000132387
AVQLFMFL	GCTGTTCAGCTCTTTATGTTCCTG	Pool 13	61752	61753	0.00151764	30386	30387	0.000609899	38095	38096	0.000844662	51491	51492	0.00102507	37760	37761	0.000961867	4856	45070	45071	0.00158651	69618	69619	0.00165302	42850	42851	0.000998708	25410	25411	0.000712178	41816	41817	0.000908781	39075	39076	0.000911017	33281	33282	0.000874746
AVRCFALF	GCAGTACGTTGTTTTGCGCTATTT	Pool 13	39237	39238	0.000964312	10909	10910	0.000218975	28983	28984	0.000642631	19482	19483	0.000387856	21545	21546	0.000548831	4604	24197	24198	0.000851777	42968	42969	0.00102025	52241	52242	0.00121758	55981	55982	0.00156897	53721	53722	0.0011675	55729	55730	0.00129929	19744	19745	0.000518955
AVRPYAGM	GCCGTGCGCCCCTATGCTGGCATG	Pool 13	336	337	8.2821e-06	NA	1	2.00711e-08	NA	1	2.21719e-08	384	385	7.66436e-06	23	24	6.1134e-07	290	231	232	8.16647e-06	332	333	7.90669e-06	NA	1	2.33065e-08	NA	1	2.80264e-08	1	2	4.34647e-08	NA	1	2.3314e-08	8	9	2.36546e-07
AVTFVCSL	GCGGTTACCTTTGTGTGTAGCTTG	Pool 13	3468	3469	8.5254e-05	2618	2619	5.25661e-05	1287	1288	2.85574e-05	2444	2445	4.86737e-05	974	975	2.48357e-05	1355	2545	2546	8.962e-05	3154	3155	7.49117e-05	1458	1459	3.40042e-05	727	728	2.04032e-05	1736	1737	3.77491e-05	712	713	1.66229e-05	2077	2078	5.46158e-05
AVVRIVNL	GCAGTCGTACGAATTGTCAATTTG	Pool 13	15827	15828	0.000388988	2161	2162	4.33936e-05	4737	4738	0.000105051	7848	7849	0.000156253	10077	10078	0.000256712	3970.5	9034	9035	0.000318035	16881	16882	0.000400843	1835	1836	4.27908e-05	850	851	2.38504e-05	10491	10492	0.000228016	6968	6969	0.000162475	1274	1275	3.35106e-05
AVVTFLFL	GCAGTAGTCACGTTCCTCTTTCTT	Pool 13	21315	21316	0.000523861	6050	6051	0.00012145	4202	4203	9.31886e-05	22607	22608	0.000450067	25622	25623	0.000652682	4705	17021	17022	0.00059918	23986	23987	0.000569543	4174	4175	9.73047e-05	120793	120794	0.00338542	13821	13822	0.000300384	11417	11418	0.000266199	18477	18478	0.000485654
AVWFLSNI	GCAGTGTGGTTCCTTAGTAACATC	Pool 13	16780	16781	0.000412409	3310	3311	6.64553e-05	5208	5209	0.000115494	16356	16357	0.000325626	31096	31097	0.000792119	4787	8721	8722	0.000307017	18957	18958	0.000450135	6250	6251	0.000145689	11793	11794	0.000330543	23583	23584	0.000512536	30300	30301	0.000706436	9289	9290	0.000244168
AVYAALGL	GCGGTATATGCCGCACTTGGTTTG	Pool 13	10798	10799	0.000265396	634	635	1.27451e-05	1137	1138	2.52317e-05	5064	5065	0.000100831	15375	15376	0.000391665	4370	5829	5830	0.000205218	9027	9028	0.000214359	236	237	5.52365e-06	639	640	1.79369e-05	7921	7922	0.000172164	774	775	1.80683e-05	13652	13653	0.00035884
AVYEYFRA	GCTGTATACGAGTACTTTAGAGCG	Pool 13	6920	6921	0.00017009	804	805	1.61572e-05	3789	3790	8.40316e-05	1158	1159	2.30727e-05	3974	3975	0.000101253	2795	3956	3957	0.000139288	7386	7387	0.000175395	3015	3016	7.02925e-05	10670	10671	0.000299069	819	820	1.78205e-05	318	319	7.43715e-06	3035	3036	7.97947e-05
AVYKMADV	GCAGTGTATAAAATGGCCGATGTT	Pool 13	5965	5966	0.00014662	3144	3145	6.31235e-05	5251	5252	0.000116447	4876	4877	9.70885e-05	25307	25308	0.000644658	4700	4387	4388	0.000154459	7110	7111	0.000168842	776	777	1.81092e-05	776	777	2.17765e-05	4597	4598	9.99253e-05	4933	4934	0.000115031	1155	1156	3.0383e-05
AVYLLAHA	GCCGTATACCTCTTAGCCCACGCC	Pool 13	335	336	8.25752e-06	NA	1	2.00711e-08	NA	1	2.21719e-08	NA	1	1.99074e-08	NA	1	2.54725e-08	64	220	221	7.77927e-06	281	282	6.69575e-06	2	3	6.99196e-08	NA	1	2.80264e-08	73	74	1.60819e-06	2	3	6.99419e-08	NA	1	2.62828e-08
AVYMAIGF	GCAGTATACATGGCTATAGGTTTT	Pool 13	26888	26889	0.000660823	570257	570258	0.0114457	13462	13463	0.000298501	19442	19443	0.00038706	11584	11585	0.000295099	4128	16194	16195	0.000570069	27438	27439	0.000651506	7990	7991	0.000186242	18211	18212	0.000510416	40132	40133	0.000872184	4566	4567	0.000106475	11252	11253	0.000295761
AVYQLLGL	GCTGTGTATCAGTTGTTGGGACTG	Pool 13	4791	4792	0.000117768	278	279	5.59983e-06	2141	2142	4.74923e-05	939	940	1.8713e-05	10446	10447	0.000266111	4007	2293	2294	8.07495e-05	5518	5519	0.000131042	450	451	1.05112e-05	140	141	3.95172e-06	6801	6802	0.000147823	1093	1094	2.55055e-05	970	971	2.55206e-05
AVYRKLGV	GCCGTCTATAGAAAACTAGGGGTG	Pool 13	1707	1708	4.19757e-05	383	384	7.70729e-06	4	5	1.1086e-07	346	347	6.90788e-06	680	681	1.73468e-05	1123	860	861	3.03075e-05	1707	1708	4.05544e-05	134	135	3.14638e-06	2	3	8.40791e-08	221	222	4.82458e-06	4158	4159	9.69628e-05	167	168	4.41552e-06
AVYRMTYV	GCTGTCTATCGTATGACGTACGTT	Pool 13	15443	15444	0.000379551	6398	6399	0.000128435	13217	13218	0.000293069	35771	35772	0.000712128	25370	25371	0.000646263	4701	9782	9783	0.000344365	17308	17309	0.000410981	13340	13341	0.000310932	115	116	3.25106e-06	37952	37953	0.000824808	13419	13420	0.000312873	15140	15141	0.000397949
AVYRYMDT	GCCGTGTACCGGTATATGGATACG	Pool 13	8242	8243	0.00020258	316	317	6.36253e-06	11148	11149	0.000247195	9521	9522	0.000189558	4305	4306	0.000109685	2881.5	4214	4215	0.000148369	7435	7436	0.000176559	11513	11514	0.000268351	26	27	7.56712e-07	3144	3145	6.83482e-05	8954	8955	0.000208777	1198	1199	3.15131e-05
AVYSHFYV	GCAGTCTACTCCCACTTCTACGTA	Pool 13	5932	5933	0.000145809	561	562	1.12799e-05	5318	5319	0.000117932	10472	10473	0.00020849	9542	9543	0.000243084	3897	3680	3681	0.000129572	6703	6704	0.000159178	23	24	5.59357e-07	42056	42057	0.0011787	22071	22072	0.000479676	162	163	3.80018e-06	8718	8719	0.00022916
AWFEQFVL	GCATGGTTTGAACAATTTGTGCTC	Pool 13	9025	9026	0.000221823	459019	459020	0.00921302	3724	3725	8.25904e-05	34424	34425	0.000685313	6318	6319	0.000160961	3379	5771	5772	0.000203176	8829	8830	0.000209658	17983	17984	0.000419145	42174	42175	0.00118201	14742	14743	0.0003204	7844	7845	0.000182898	10100	10101	0.000265483
AWFFCLLL	GCGTGGTTCTTTTGCCTCTTGCTA	Pool 13	7840	7841	0.0001927	1086	1087	2.18172e-05	8432	8433	0.000186976	132354	132355	0.00263485	2710	2711	6.9056e-05	2358.5	4872	4873	0.000171531	8424	8425	0.000200042	2019	2020	4.70792e-05	69682	69683	0.00195296	4011	4012	8.71902e-05	5635	5636	0.000131398	6129	6130	0.000161114
AWYFNGAL	GCTTGGTATTTCAACGGAGCTCTC	Pool 13	7436	7437	0.000182771	2654	2655	5.32887e-05	13145	13146	0.000291472	2810	2811	5.59598e-05	21144	21145	0.000538616	4591	5727	5728	0.000201627	8224	8225	0.000195293	16199	16200	0.000377566	61727	61728	0.00173001	6355	6356	0.000138131	59285	59286	0.00138219	46165	46166	0.00121337
AYDIYSRL	GCTTACGACATATATTCGCGTCTT	Pool 13	61930	61931	0.00152201	27191	27192	0.000545772	60364	60365	0.00133841	28163	28164	0.000560673	78414	78415	0.00199743	4971	42713	42714	0.00150355	71220	71221	0.00169106	41443	41444	0.000965916	19811	19812	0.000555258	124195	124196	0.00269907	135232	135233	0.00315282	50942	50943	0.00133893
AYFESPNL	GCGTACTTTGAGTCTCCTAATCTC	Pool 13	13525	13526	0.000332414	7547	7548	0.000151496	14822	14823	0.000328654	6282	6283	0.000125078	19976	19977	0.000508864	4554	9328	9329	0.000328384	14847	14848	0.000352548	2759	2760	6.4326e-05	691	692	1.93942e-05	3115	3116	6.7718e-05	2829	2830	6.59785e-05	2828	2829	7.43542e-05
AYFRIKLM	GCTTATTTTCGCATTAAACTCATG	Pool 13	187	188	4.62028e-06	NA	1	2.00711e-08	NA	1	2.21719e-08	125	126	2.50834e-06	NA	1	2.54725e-08	64	109	110	3.87203e-06	191	192	4.55881e-06	NA	1	2.33065e-08	NA	1	2.80264e-08	NA	1	2.17323e-08	NA	1	2.3314e-08	NA	1	2.62828e-08
AYGRHAGL	GCGTACGGCCGTCATGCGGGTCTG	Pool 13	17218	17219	0.000423174	2308	2309	4.63441e-05	5789	5790	0.000128375	9735	9736	0.000193819	13031	13032	0.000331958	4231	9857	9858	0.000347005	17190	17191	0.00040818	44668	44669	0.00104108	239	240	6.72633e-06	12786	12787	0.000277891	6211	6212	0.000144826	2370	2371	6.23166e-05
AYINMVPL	GCTTACATTAATATGGTGCCACTG	Pool 13	5531	5532	0.000135954	2441	2442	4.90135e-05	9352	9353	0.000207374	3996	3997	7.957e-05	1270	1271	3.23756e-05	1576.5	3571	3572	0.000125736	6144	6145	0.000145906	687	688	1.60349e-05	317	318	8.91238e-06	10706	10707	0.000232688	25931	25932	0.000604578	2674	2675	7.03066e-05
AYIYFTDF	GCATACATTTATTTCACAGATTTT	Pool 13	21420	21421	0.000526442	8180	8181	0.000164201	34547	34548	0.000765996	11671	11672	0.000232359	17029	17030	0.000433797	4445	13167	13168	0.000463518	21167	21168	0.000502609	19238	19239	0.000448394	26443	26444	0.000741129	40493	40494	0.000880029	13244	13245	0.000308793	6402	6403	0.000168289
AYKYLAAL	GCGTACAAATATCTAGCGGCTTTG	Pool 13	14571	14572	0.000358121	3184	3185	6.39263e-05	12540	12541	0.000278058	25002	25003	0.000497745	8111	8112	0.000206633	3704	7918	7919	0.000278751	15719	15720	0.000373253	16396	16397	0.000382157	1999	2000	5.60527e-05	10067	10068	0.000218801	15228	15229	0.000355048	4623	4624	0.000121532
AYLMSQPL	GCCTATCTAATGTCCCAGCCCTTG	Pool 13	4719	4720	0.000115999	547	548	1.09989e-05	6959	6960	0.000154317	20050	20051	0.000399164	4599	4600	0.000117174	2974.5	3047	3048	0.000107291	4875	4876	0.000115775	3419	3420	7.97083e-05	1258	1259	3.52852e-05	1047	1048	2.27755e-05	3737	3738	8.71476e-05	911	912	2.397e-05
AYWMKTPL	GCATATTGGATGAAGACGCCGTTG	Pool 13	3617	3618	8.89158e-05	4886	4887	9.80873e-05	954	955	2.11742e-05	1763	1764	3.51167e-05	243	244	6.21529e-06	664	1837	1838	6.46982e-05	3370	3371	8.00404e-05	4	5	1.16533e-07	200	201	5.6333e-06	3149	3150	6.84569e-05	472	473	1.10275e-05	4039	4040	0.000106183
AYYFIGFL	GCCTATTATTTCATCGGCTTTCTC	Pool 13	6743	6744	0.00016574	2883	2884	5.78849e-05	2744	2745	6.08619e-05	2929	2930	5.83288e-05	7373	7374	0.000187834	3605	4882	4883	0.000171883	6818	6819	0.000161909	6103	6104	0.000142263	282	283	7.93146e-06	11350	11351	0.000246684	1933	1934	4.50892e-05	3983	3984	0.000104711
AYYLTYIL	GCGTACTATCTGACCTATATCCTG	Pool 13	7766	7767	0.000190882	1429	1430	2.87016e-05	2316	2317	5.13724e-05	3613	3614	7.19454e-05	3571	3572	9.09878e-05	2668	4357	4358	0.000153403	8096	8097	0.000192254	310	311	7.24833e-06	35	36	1.00895e-06	8425	8426	0.000183117	6	7	1.63198e-07	5202	5203	0.00013675
AYYLYIPL	GCCTATTATTTGTATATCCCGCTC	Pool 13	9813	9814	0.000241189	563	564	1.13201e-05	7521	7522	0.000166777	5064	5065	0.000100831	5887	5888	0.000149982	3283.5	5817	5818	0.000204795	10891	10892	0.000258618	17205	17206	0.000401012	25117	25118	0.000703966	5394	5395	0.000117246	3427	3428	7.99203e-05	2310	2311	6.07397e-05
AYYSLQCL	GCGTACTACTCACTTCAATGCTTG	Pool 13	10071	10072	0.000247529	3186	3187	6.39665e-05	8435	8436	0.000187042	30398	30399	0.000605166	4267	4268	0.000108717	2869	6180	6181	0.000217573	11141	11142	0.000264553	7912	7913	0.000184425	943	944	2.64569e-05	1945	1946	4.22911e-05	3775	3776	8.80335e-05	2041	2042	5.36696e-05
AYYVSGVL	GCTTACTACGTTTCAGGCGTATTG	Pool 13	13763	13764	0.000338264	834	835	1.67593e-05	8077	8078	0.000179105	9600	9601	0.000191131	5156	5157	0.000131362	3105.5	7145	7146	0.000251541	14280	14281	0.000339085	6846	6847	0.00015958	1261	1262	3.53693e-05	9505	9506	0.000206588	9854	9855	0.000229759	6019	6020	0.000158223
CAHIYSAL	TGTGCACACATTTATAGCGCCCTT	Pool 13	4731	4732	0.000116293	7	8	1.60568e-07	6434	6435	0.000142676	143	144	2.86667e-06	929	930	2.36894e-05	1324	2345	2346	8.25799e-05	4119	4120	9.78245e-05	130	131	3.05315e-06	205	206	5.77343e-06	1939	1940	4.21607e-05	217	218	5.08244e-06	103	104	2.73342e-06
CALALAYL	TGCGCCCTTGCCCTCGCATATCTC	Pool 13	2039	2040	5.0135e-05	31	32	6.42274e-07	1132	1133	2.51208e-05	31	32	6.37038e-07	102	103	2.62367e-06	480.5	1276	1277	4.49508e-05	1973	1974	4.68703e-05	NA	1	2.33065e-08	2188	2189	6.13497e-05	734	735	1.59733e-05	2	3	6.99419e-08	124	125	3.28536e-06
CAYSRVHL	TGTGCGTACAGTCGAGTGCACCTG	Pool 13	2742	2743	6.74119e-05	26	27	5.41919e-07	10272	10273	0.000227772	397	398	7.92316e-06	16964	16965	0.000432141	4441	1207	1208	4.2522e-05	2867	2868	6.80972e-05	194	195	4.54477e-06	22	23	6.44606e-07	53	54	1.17355e-06	134	135	3.14739e-06	54469	54470	0.00143163
CGAFYLPL	TGCGGCGCCTTTTATCTCCCATTG	Pool 13	12122	12123	0.000297934	1379	1380	2.76981e-05	2719	2720	6.03076e-05	8526	8527	0.000169751	5543	5544	0.00014122	3212	7592	7593	0.000267276	11866	11867	0.000281768	10612	10613	0.000247352	2388	2389	6.6955e-05	65248	65249	0.00141801	5243	5244	0.000122258	5821	5822	0.000153019
CGFPFLLL	TGTGGATTTCCGTTCCTCCTACTT	Pool 13	4722	4723	0.000116072	61	62	1.24441e-06	6206	6207	0.000137621	1513	1514	3.01398e-05	1741	1742	4.43731e-05	1880.5	2961	2962	0.000104263	4237	4238	0.000100626	91	92	2.1442e-06	65	66	1.84974e-06	1036	1037	2.25364e-05	596	597	1.39184e-05	11845	11846	0.000311347
CGFVIAHL	TGTGGATTTGTTATAGCTCATTTA	Pool 13	25576	25577	0.000628579	6268	6269	0.000125825	25868	25869	0.000573566	55336	55337	0.00110162	24061	24062	0.00061292	4674	16767	16768	0.000590239	26048	26049	0.000618502	11861	11862	0.000276462	10621	10622	0.000297696	25247	25248	0.000548698	13525	13526	0.000315345	21695	21696	0.000570233
CGFVKGAL	TGCGGTTTTGTGAAAGGCGCCTTG	Pool 13	1993	1994	4.90045e-05	13674	13675	0.000274472	73	74	1.64072e-06	115	116	2.30926e-06	1961	1962	4.99771e-05	2008	990	991	3.48835e-05	1648	1649	3.91535e-05	176	177	4.12526e-06	44	45	1.26119e-06	4815	4816	0.000104663	145	146	3.40384e-06	1011	1012	2.65982e-05
CGKAFSQL	TGCGGTAAGGCATTCTCCCAACTA	Pool 13	8199	8200	0.000201523	17993	17994	0.000361159	6825	6826	0.000151346	3619	3620	7.20649e-05	2248	2249	5.72877e-05	2145	4647	4648	0.000163611	7667	7668	0.000182067	24	25	5.82663e-07	632	633	1.77407e-05	6297	6298	0.00013687	2168	2169	5.0568e-05	8168	8169	0.000214705
CGKRFAEL	TGTGGTAAACGATTCGCCGAGTTG	Pool 13	1208	1209	2.97123e-05	4	5	1.00355e-07	116	117	2.59412e-06	NA	1	1.99074e-08	3255	3256	8.29385e-05	2562	737	738	2.59778e-05	1606	1607	3.81563e-05	3535	3536	8.24119e-05	129	130	3.64343e-06	1601	1602	3.48152e-05	NA	1	2.3314e-08	14	15	3.94243e-07
CGLGYRTL	TGTGGACTGGGGTATCGAACGCTG	Pool 13	2145	2146	5.274e-05	26	27	5.41919e-07	1246	1247	2.76484e-05	1268	1269	2.52625e-05	166	167	4.25391e-06	571	1669	1670	5.87845e-05	1873	1874	4.44959e-05	2	3	6.99196e-08	58	59	1.65356e-06	828	829	1.80161e-05	2	3	6.99419e-08	6087	6088	0.00016001
CGRRFGRL	TGTGGGCGACGGTTCGGGAGGTTG	Pool 13	828	829	2.03735e-05	200	201	4.03428e-06	1	2	4.43439e-08	NA	1	1.99074e-08	394	395	1.00616e-05	838	652	653	2.29858e-05	1175	1176	2.79227e-05	NA	1	2.33065e-08	2	3	8.40791e-08	95	96	2.0863e-06	2341	2342	5.46013e-05	994	995	2.61514e-05
CGTVFPLL	TGCGGTACAGTATTCCCTCTATTG	Pool 13	5274	5275	0.000129638	2026	2027	4.0684e-05	3505	3506	7.77348e-05	4300	4301	8.56218e-05	1881	1882	4.79393e-05	1966.5	3903	3904	0.000137422	6262	6263	0.000148707	4866	4867	0.000113433	3919	3920	0.000109863	2411	2412	5.24184e-05	511	512	1.19368e-05	8183	8184	0.000215099
CGWTFTSM	TGCGGCTGGACCTTCACGTCCATG	Pool 13	3738	3739	9.18895e-05	1362	1363	2.73569e-05	204	205	4.54525e-06	298	299	5.95232e-06	87	88	2.24158e-06	453	2039	2040	7.18086e-05	3798	3799	9.02027e-05	303	304	7.08518e-06	28	29	8.12765e-07	220	221	4.80285e-06	48	49	1.14238e-06	555	556	1.46133e-05
CGYQSTML	TGTGGTTACCAGAGCACGATGCTG	Pool 13	702	703	1.72769e-05	NA	1	2.00711e-08	37	38	8.42533e-07	167	168	3.34445e-06	525	526	1.33985e-05	986.5	255	256	9.01128e-06	677	678	1.60983e-05	NA	1	2.33065e-08	24	25	7.00659e-07	4	5	1.08662e-07	NA	1	2.3314e-08	NA	1	2.62828e-08
CGYSRAEV	TGTGGATACAGCCGGGCTGAGGTT	Pool 13	1796	1797	4.4163e-05	703	704	1.413e-05	4	5	1.1086e-07	462	463	9.21714e-06	158	159	4.05013e-06	560	991	992	3.49187e-05	1961	1962	4.65853e-05	2	3	6.99196e-08	1	2	5.60527e-08	348	349	7.58459e-06	4	5	1.1657e-07	82	83	2.18148e-06
CGYTCSPL	TGCGGGTACACGTGTTCACCATTA	Pool 13	3709	3710	9.11768e-05	184	185	3.71315e-06	8504	8505	0.000188572	2494	2495	4.9669e-05	763	764	1.9461e-05	1190	2271	2272	7.99751e-05	3835	3836	9.10812e-05	135	136	3.16969e-06	1239	1240	3.47527e-05	3136	3137	6.81744e-05	3	4	9.32559e-08	1713	1714	4.50488e-05
CGYTSVLL	TGTGGCTACACATCTGTCTTGCTT	Pool 13	3756	3757	9.23319e-05	419	420	8.42984e-06	4877	4878	0.000108155	485	486	9.67501e-06	10234	10235	0.000260711	3986	2225	2226	7.83559e-05	4641	4642	0.000110219	199	200	4.66131e-06	878	879	2.46352e-05	587	588	1.27786e-05	2750	2751	6.41367e-05	194	195	5.12515e-06
CIAEFLSL	TGCATCGCAGAATTTCTCAGCTTA	Pool 13	2899	2900	7.12703e-05	1271	1272	2.55304e-05	183	184	4.07963e-06	8882	8883	0.000176838	777	778	1.98176e-05	1209	1721	1722	6.06149e-05	2538	2539	6.02855e-05	1194	1195	2.78513e-05	132	133	3.72751e-06	317	318	6.91088e-06	676	677	1.57836e-05	574	575	1.51126e-05
CIFLFSFI	TGTATATTCCTGTTCAGTTTTATC	Pool 13	29829	29830	0.000733101	8543	8544	0.000171487	15045	15046	0.000333599	10136	10137	0.000201802	20082	20083	0.000511564	4557	21060	21061	0.000741354	29173	29174	0.000692702	7752	7753	0.000180695	38570	38571	0.00108101	992	993	2.15802e-05	21906	21907	0.000510739	14775	14776	0.000388355
CIFLGTLL	TGCATTTTCTTAGGGACCCTGTTA	Pool 13	22260	22261	0.000547086	5014	5015	0.000100656	13334	13335	0.000295663	13263	13264	0.000264052	16366	16367	0.000416909	4410	14936	14937	0.000525787	22128	22129	0.000525427	10836	10837	0.000252573	38057	38058	0.00106663	35737	35738	0.00077667	19583	19584	0.000456581	23360	23361	0.000613994
CLFNFLLL	TGTTTGTTTAACTTCCTCTTATTG	Pool 13	12005	12006	0.000295059	1925	1926	3.86569e-05	9444	9445	0.000209414	2005	2006	3.99343e-05	26610	26611	0.000677849	4722	9419	9420	0.000331587	12789	12790	0.000303683	7343	7344	0.000171163	1595	1596	4.47301e-05	16609	16610	0.000360974	48677	48678	0.00113488	13070	13071	0.000343543
CLLAYSGL	TGCCTCTTGGCATATTCAGGACTG	Pool 13	283	284	6.97957e-06	318	319	6.40267e-06	NA	1	2.21719e-08	46	47	9.35649e-07	1314	1315	3.34963e-05	1617.5	193	194	6.82886e-06	387	388	9.2126e-06	1	2	4.66131e-08	2	3	8.40791e-08	2	3	6.5197e-08	NA	1	2.3314e-08	NA	1	2.62828e-08
CLRVYAGL	TGTCTTCGAGTCTACGCCGGACTC	Pool 13	1731	1732	4.25656e-05	NA	1	2.00711e-08	74	75	1.66289e-06	39	40	7.96297e-07	27	28	7.1323e-07	300.5	1060	1061	3.73475e-05	1553	1554	3.68979e-05	375	376	8.76325e-06	1	2	5.60527e-08	2032	2033	4.41819e-05	5	6	1.39884e-07	7	8	2.10263e-07
CLYIHMFL	TGCCTGTATATTCACATGTTTCTT	Pool 13	6759	6760	0.000166134	607	608	1.22032e-05	595	596	1.32145e-05	1267	1268	2.52426e-05	10009	10010	0.00025498	3956	4024	4025	0.000141681	6366	6367	0.000151177	2101	2102	4.89903e-05	1159	1160	3.25106e-05	31834	31835	0.000691849	749	750	1.74855e-05	9388	9389	0.00024677
CMITFQFI	TGCATGATTACCTTTCAGTTTATA	Pool 13	14017	14018	0.000344506	6015	6016	0.000120747	7455	7456	0.000165314	5946	5947	0.000118389	5800	5801	0.000147766	3263.5	9154	9155	0.000322259	15347	15348	0.00036442	4243	4244	9.89129e-05	1525	1526	4.27682e-05	8275	8276	0.000179857	11661	11662	0.000271887	6809	6810	0.000178986
CMLAFADM	TGCATGTTGGCGTTTGCTGACATG	Pool 13	3097	3098	7.61363e-05	144	145	2.9103e-06	462	463	1.02656e-05	1707	1708	3.40019e-05	2354	2355	5.99878e-05	2194	1879	1880	6.61766e-05	3710	3711	8.81133e-05	657	658	1.53357e-05	1302	1303	3.65184e-05	6198	6199	0.000134719	1352	1353	3.15438e-05	82	83	2.18148e-06
CMLLASHL	TGCATGCTACTAGCTTCCCATTTG	Pool 13	20419	20420	0.000501841	240886	240887	0.00483486	9912	9913	0.00021979	13384	13385	0.000266461	29252	29253	0.000745147	4759	13212	13213	0.000465102	21204	21205	0.000503487	5555	5556	0.000129491	2813	2814	7.88662e-05	14383	14384	0.000312598	12163	12164	0.000283591	28603	28604	0.000751795
CMWLSSPL	TGCATGTGGCTATCATCCCCACTG	Pool 13	2841	2842	6.98449e-05	14	15	3.01066e-07	33	34	7.53846e-07	780	781	1.55477e-05	2632	2633	6.70691e-05	2326	1495	1496	5.26597e-05	2859	2860	6.79073e-05	23510	23511	0.00054796	605	606	1.6984e-05	887	888	1.92983e-05	1	2	4.66279e-08	147	148	3.88986e-06
CNFLFVNL	TGTAATTTTCTTTTCGTTAACCTC	Pool 13	7579	7580	0.000186286	3192	3193	6.40869e-05	4203	4204	9.32108e-05	96105	96106	0.00191322	7425	7426	0.000189159	3615	5721	5722	0.000201416	7216	7217	0.000171359	1773	1774	4.13458e-05	1884	1885	5.28297e-05	406	407	8.84506e-06	856	857	1.99801e-05	5403	5404	0.000142032
CNKSFVFL	TGCAACAAATCGTTTGTCTTCTTA	Pool 13	14227	14228	0.000349667	44575	44576	0.000894687	12397	12398	0.000274888	8097	8098	0.00016121	2828	2829	7.20617e-05	2400	9205	9206	0.000324054	14020	14021	0.000332912	3773	3774	8.79588e-05	3217	3218	9.01889e-05	27942	27943	0.000607267	3792	3793	8.84299e-05	9728	9729	0.000255706
CNMVFSSL	TGTAATATGGTATTCTCGTCCCTC	Pool 13	7218	7219	0.000177414	690	691	1.38691e-05	4266	4267	9.46076e-05	5402	5403	0.00010756	1608	1609	4.09853e-05	1810	5310	5311	0.000186949	6182	6183	0.000146808	1579	1580	3.68243e-05	9317	9318	0.00026115	2743	2744	5.96335e-05	1878	1879	4.38069e-05	43477	43478	0.00114273
CNPLFAAL	TGTAATCCGCTATTTGCCGCCTTG	Pool 13	7563	7564	0.000185893	283	284	5.70018e-06	1390	1391	3.08412e-05	5046	5047	0.000100473	2288	2289	5.83066e-05	2160	3910	3911	0.000137668	7236	7237	0.000171834	3054	3055	7.12014e-05	7328	7329	0.000205405	2252	2253	4.8963e-05	455	456	1.06312e-05	4796	4797	0.000126079
CNYIFTVI	TGCAATTACATCTTCACTGTTATA	Pool 13	4389	4390	0.000107888	797	798	1.60167e-05	43061	43062	0.000954768	4951	4952	9.85816e-05	1514	1515	3.85909e-05	1761	3075	3076	0.000108276	4904	4905	0.000116463	5796	5797	0.000135108	1566	1567	4.39173e-05	4044	4045	8.79073e-05	1454	1455	3.39218e-05	433	434	1.14068e-05
CQFYVDNL	TGCCAATTTTACGTTGACAACCTG	Pool 13	2209	2210	5.43129e-05	524	525	1.05373e-05	1555	1556	3.44995e-05	1083	1084	2.15796e-05	4103	4104	0.000104539	2830	1586	1587	5.58629e-05	2890	2891	6.86433e-05	2686	2687	6.26246e-05	21	22	6.1658e-07	589	590	1.28221e-05	6006	6007	0.000140047	2256	2257	5.93204e-05
CQSIYAYL	TGTCAGTCGATTTACGCGTATCTT	Pool 13	3792	3793	9.32166e-05	726	727	1.45917e-05	484	485	1.07534e-05	1837	1838	3.65898e-05	6457	6458	0.000164501	3414	2536	2537	8.93032e-05	3904	3905	9.27196e-05	567	568	1.32381e-05	40	41	1.14908e-06	1816	1817	3.94877e-05	2475	2476	5.77254e-05	226	227	5.96621e-06
CRYYYPNV	TGTAGGTACTACTATCCGAATGTC	Pool 13	4002	4003	9.83776e-05	3284	3285	6.59334e-05	369	370	8.20361e-06	649	650	1.29398e-05	16198	16199	0.000412629	4401	2395	2396	8.434e-05	4325	4326	0.000102716	180	181	4.21848e-06	31	32	8.96844e-07	413	414	8.99719e-06	61950	61951	0.00144432	6086	6087	0.000159984
CSFFIQAV	TGTTCCTTCTTCATTCAAGCTGTC	Pool 13	8058	8059	0.000198058	2762	2763	5.54563e-05	57938	57939	0.00128462	8426	8427	0.00016776	1667	1668	4.24881e-05	1847	5916	5917	0.00020828	8017	8018	0.000190378	4432	4433	0.000103318	3739	3740	0.000104819	12166	12167	0.000264417	746	747	1.74155e-05	2250	2251	5.91627e-05
CSFQIYSV	TGTAGTTTCCAAATTTACTCGGTA	Pool 13	24528	24529	0.000602824	7781	7782	0.000156193	10803	10804	0.000239546	24355	24356	0.000484865	13183	13184	0.00033583	4241.5	16767	16768	0.000590239	23487	23488	0.000557694	23274	23275	0.000542459	22412	22413	0.000628155	29451	29452	0.000640061	30705	30706	0.000715879	4224	4225	0.000111045
CSHAFHLL	TGTTCGCATGCCTTTCATCTGTTG	Pool 13	12326	12327	0.000302948	5983	5984	0.000120105	13464	13465	0.000298545	2855	2856	5.68556e-05	8840	8841	0.000225202	3803	7437	7438	0.00026182	11723	11724	0.000278372	12436	12437	0.000289863	5857	5858	0.000164178	4883	4884	0.000106141	1466	1467	3.42016e-05	4192	4193	0.000110204
CSILFPLI	TGCAGTATATTATTCCCTTTAATC	Pool 13	7793	7794	0.000191545	93	94	1.88668e-06	7200	7201	0.00015966	640	641	1.27607e-05	347	348	8.86443e-06	791	5139	5140	0.00018093	7760	7761	0.000184276	3965	3966	9.24337e-05	31938	31939	0.000895134	559	560	1.21701e-05	187	188	4.38303e-06	5011	5012	0.00013173
CSITFTSL	TGCTCGATAACATTCACATCCCTT	Pool 13	4635	4636	0.000113934	2599	2600	5.21847e-05	17330	17331	0.000384262	704	705	1.40347e-05	3318	3319	8.45433e-05	2589	3357	3358	0.000118203	5262	5263	0.000124964	10585	10586	0.000246723	33124	33125	0.000928373	78	79	1.71686e-06	233	234	5.45547e-06	866	867	2.27872e-05
CSLAVTNL	TGTTCACTGGCAGTAACTAACCTT	Pool 13	2656	2657	6.52983e-05	4	5	1.00355e-07	931	932	2.06642e-05	370	371	7.38565e-06	716	717	1.82638e-05	1149	1344	1345	4.73444e-05	2049	2050	4.86748e-05	6	7	1.63146e-07	NA	1	2.80264e-08	773	774	1.68208e-05	652	653	1.5224e-05	4603	4604	0.000121006
CSLFASAL	TGCTCTTTATTCGCGTCGGCCTTG	Pool 13	1406	1407	3.45784e-05	844	845	1.696e-05	2062	2063	4.57407e-05	1747	1748	3.47982e-05	1372	1373	3.49738e-05	1665.5	755	756	2.66114e-05	1668	1669	3.96284e-05	509	510	1.18863e-05	9	10	2.80264e-07	1886	1887	4.10089e-05	6	7	1.63198e-07	142	143	3.75845e-06
CSLFMRNI	TGCTCGCTGTTTATGCGCAACATA	Pool 13	16832	16833	0.000413687	5645	5646	0.000113321	11229	11230	0.000248991	3865	3866	7.69621e-05	18505	18506	0.000471394	4504	10512	10513	0.000370061	18246	18247	0.000433253	12222	12223	0.000284876	411	412	1.15469e-05	22786	22787	0.000495215	5315	5316	0.000123937	9458	9459	0.000248609
CSLLFAVL	TGCTCTTTATTGTTTGCGGTCTTG	Pool 13	12479	12480	0.000306708	2902	2903	5.82663e-05	3561	3562	7.89764e-05	5651	5652	0.000112517	2921	2922	7.44307e-05	2437	8836	8837	0.000311065	11828	11829	0.000280865	5241	5242	0.000122173	167	168	4.70843e-06	15030	15031	0.000326659	22413	22414	0.000522559	2142	2143	5.63241e-05
CSMTFEQL	TGCTCCATGACCTTTGAGCAGTTA	Pool 13	7457	7458	0.000183288	1977	1978	3.97006e-05	56401	56402	0.00125054	1214	1215	2.41875e-05	27069	27070	0.000689541	4728	4467	4468	0.000157275	7213	7214	0.000171288	2291	2292	5.34186e-05	155	156	4.37211e-06	764	765	1.66252e-05	2664	2665	6.21317e-05	1265	1266	3.32741e-05
CSNFFGSF	TGCTCCAATTTCTTTGGCTCATTT	Pool 13	10141	10142	0.000249249	1537	1538	3.08693e-05	1018	1019	2.25932e-05	2969	2970	5.91251e-05	2104	2105	5.36196e-05	2079	4297	4298	0.000151291	7692	7693	0.000182661	8312	8313	0.000193747	580	581	1.62833e-05	5077	5078	0.000110357	9373	9374	0.000218545	852	853	2.24193e-05
CSPMYYFL	TGTTCCCCAATGTATTACTTCCTT	Pool 13	8122	8123	0.000199631	2369	2370	4.75684e-05	6833	6834	0.000151523	7236	7237	0.00014407	7269	7270	0.000185185	3583	5706	5707	0.000200888	8259	8260	0.000196124	12047	12048	0.000280797	7180	7181	0.000201257	6604	6605	0.000143542	3731	3732	8.70077e-05	9125	9126	0.000239857
CSPRWSAL	TGTTCCCCGAGATGGTCCGCATTA	Pool 13	3983	3984	9.79106e-05	419	420	8.42984e-06	9613	9614	0.000213161	3274	3275	6.51968e-05	1249	1250	3.18406e-05	1568	2025	2026	7.13158e-05	3076	3077	7.30597e-05	12	13	3.02985e-07	7	8	2.24211e-07	1232	1233	2.6796e-05	7386	7387	0.00017222	4145	4146	0.000108969
CSRSFHNL	TGTTCTCGTTCGTTCCATAACCTA	Pool 13	3980	3981	9.78369e-05	921	922	1.85055e-05	1242	1243	2.75597e-05	1879	1880	3.7426e-05	2630	2631	6.70182e-05	2322.5	2916	2917	0.000102679	4152	4153	9.8608e-05	5220	5221	0.000121683	734	735	2.05994e-05	551	552	1.19963e-05	643	644	1.50142e-05	623	624	1.64005e-05
CSTFRLSL	TGTTCCACGTTCAGGTTGTCACTC	Pool 13	2598	2599	6.38729e-05	294	295	5.92096e-06	43	44	9.75565e-07	3865	3866	7.69621e-05	3995	3996	0.000101788	2804	1465	1466	5.16037e-05	1934	1935	4.59443e-05	9	10	2.33065e-07	8	9	2.52237e-07	1152	1153	2.50574e-05	10089	10090	0.000235238	11215	11216	0.000294788
CSWTLATV	TGTAGTTGGACGCTCGCAACTGTC	Pool 13	1555	1556	3.82402e-05	137	138	2.76981e-06	152	153	3.3923e-06	13	14	2.78704e-07	911	912	2.32309e-05	1308	778	779	2.7421e-05	1678	1679	3.98658e-05	49	50	1.16533e-06	1608	1609	4.50944e-05	10618	10619	0.000230776	78	79	1.8418e-06	122	123	3.23279e-06
CSYFLGLL	TGCAGTTATTTTCTTGGCCTATTA	Pool 13	12075	12076	0.000296779	8863	8864	0.00017791	7164	7165	0.000158862	14774	14775	0.000294132	5489	5490	0.000139844	3203	5707	5708	0.000200923	12448	12449	0.000295587	7650	7651	0.000178318	4237	4238	0.000118776	3076	3077	6.68704e-05	23948	23949	0.000558346	13437	13438	0.000353189
CSYKLVTV	TGTTCCTATAAACTCGTCACGGTA	Pool 13	NA	1	2.4576e-08	NA	1	2.00711e-08	NA	1	2.21719e-08	NA	1	1.99074e-08	NA	1	2.54725e-08	64	NA	1	3.52003e-08	NA	1	2.37438e-08	NA	1	2.33065e-08	NA	1	2.80264e-08	NA	1	2.17323e-08	NA	1	2.3314e-08	NA	1	2.62828e-08
CSYKNGVL	TGTTCATACAAGAACGGCGTTCTG	Pool 13	1911	1912	4.69892e-05	NA	1	2.00711e-08	92	93	2.06199e-06	23	24	4.77778e-07	2964	2965	7.5526e-05	2452	1068	1069	3.76291e-05	1565	1566	3.71828e-05	2049	2050	4.77784e-05	5374	5375	0.000150642	52	53	1.15181e-06	2	3	6.99419e-08	10	11	2.89111e-07
CSYLGKEL	TGTTCCTACCTGGGCAAAGAGCTC	Pool 13	1359	1360	3.34233e-05	1	2	4.01421e-08	2	3	6.65158e-08	269	270	5.375e-06	NA	1	2.54725e-08	64	933	934	3.28771e-05	1145	1146	2.72104e-05	2	3	6.99196e-08	2	3	8.40791e-08	278	279	6.06332e-06	2	3	6.99419e-08	6307	6308	0.000165792
CSYRLLSV	TGCAGTTATAGGCTTCTGTCCGTC	Pool 13	24167	24168	0.000593952	46275	46276	0.000928808	9213	9214	0.000204292	6518	6519	0.000129777	14278	14279	0.000363722	4312	13394	13395	0.000471508	22348	22349	0.00053065	4312	4313	0.000100521	8722	8723	0.000244474	533815	533816	0.0116011	73687	73688	0.00171796	10693	10694	0.000281069
CSYVRMVF	TGCTCTTATGTCCGTATGGTATTC	Pool 13	5676	5677	0.000139518	3955	3956	7.94011e-05	1754	1755	3.89117e-05	11597	11598	0.000230886	2821	2822	7.18834e-05	2399	3910	3911	0.000137668	5739	5740	0.000136289	1505	1506	3.50996e-05	495	496	1.39011e-05	3351	3352	7.28468e-05	12905	12906	0.00030089	17376	17377	0.000456717
CTAIFYTL	TGTACCGCGATCTTCTATACGCTC	Pool 13	9404	9405	0.000231137	925	926	1.85858e-05	1971	1972	4.3723e-05	430	431	8.5801e-06	21107	21108	0.000537674	4590	5979	5980	0.000210498	10734	10735	0.00025489	731	732	1.70604e-05	797	798	2.2365e-05	5571	5572	0.000121093	5854	5855	0.000136503	3902	3903	0.000102582
CTFMLTQM	TGTACATTTATGCTCACTCAAATG	Pool 13	2399	2400	5.89823e-05	104	105	2.10746e-06	724	725	1.60746e-05	281	282	5.61389e-06	502	503	1.28127e-05	955.5	1509	1510	5.31525e-05	2306	2307	5.4777e-05	654	655	1.52658e-05	12	13	3.64343e-07	11747	11748	0.000255312	31	32	7.46047e-07	36199	36200	0.000951439
CTFVLSYL	TGTACGTTTGTTCTTTCCTATTTA	Pool 13	20208	20209	0.000496656	2867	2868	5.75638e-05	21158	21159	0.000469136	19456	19457	0.000387339	13936	13937	0.00035501	4288	13490	13491	0.000474887	21960	21961	0.000521438	25892	25893	0.000603476	56471	56472	0.00158271	9992	9993	0.000217171	13191	13192	0.000307558	15548	15549	0.000408672
CTLKYSIL	TGTACCCTAAAATACAGTATCTTA	Pool 13	4294	4295	0.000105554	524	525	1.05373e-05	2341	2342	5.19267e-05	894	895	1.78171e-05	1593	1594	4.06032e-05	1803.5	3072	3073	0.000108171	4640	4641	0.000110195	6706	6707	0.000156317	58	59	1.65356e-06	1382	1383	3.00558e-05	910	911	2.1239e-05	4276	4277	0.000112412
CTMYIISL	TGTACCATGTATATAATCTCCCTC	Pool 13	5021	5022	0.00012342	288	289	5.80054e-06	1031	1032	2.28814e-05	2451	2452	4.8813e-05	3333	3334	8.49253e-05	2594.5	3151	3152	0.000110951	4754	4755	0.000112902	7050	7051	0.000164334	536	537	1.50502e-05	1140	1141	2.47966e-05	737	738	1.72057e-05	497	498	1.30889e-05
CTRIFAGI	TGTACGCGGATATTCGCTGGGATC	Pool 13	3149	3150	7.74143e-05	1147	1148	2.30416e-05	NA	1	2.21719e-08	548	549	1.09292e-05	16	17	4.33033e-07	265.5	1830	1831	6.44518e-05	3013	3014	7.15638e-05	2	3	6.99196e-08	6	7	1.96185e-07	515	516	1.12139e-05	613	614	1.43148e-05	2916	2917	7.66671e-05
CTWFQADL	TGCACTTGGTTCCAAGCCGATCTC	Pool 13	3991	3992	9.81072e-05	171	172	3.45222e-06	974	975	2.16176e-05	5192	5193	0.000103379	1425	1426	3.63238e-05	1710	2364	2365	8.32487e-05	4023	4024	9.55451e-05	5	6	1.39839e-07	182	183	5.12883e-06	10419	10420	0.000226451	55	56	1.30558e-06	1725	1726	4.53642e-05
CTYCRRHF	TGTACTTATTGCAGGAGACACTTC	Pool 13	11508	11509	0.000282845	462	463	9.2929e-06	6111	6112	0.000135515	6534	6535	0.000130095	26853	26854	0.000684039	4724	6509	6510	0.000229154	10876	10877	0.000258261	7323	7324	0.000170697	305	306	8.57607e-06	5669	5670	0.000123222	2104	2105	4.90759e-05	29981	29982	0.000788012
CTYDYLFV	TGTACATATGATTATTTGTTTGTA	Pool 13	5631	5632	0.000138412	20765	20766	0.000416796	3690	3691	8.18366e-05	366	367	7.30602e-06	16454	16455	0.00041915	4418	3904	3905	0.000137457	5554	5555	0.000131897	123325	123326	0.0028743	283	284	7.95949e-06	356	357	7.75845e-06	1014	1015	2.36637e-05	2385	2386	6.27109e-05
CTYKVTGL	TGTACTTATAAAGTCACAGGTCTC	Pool 13	10438	10439	0.000256548	3503	3504	7.0329e-05	3408	3409	7.55841e-05	4795	4796	9.5476e-05	5951	5952	0.000151612	3298	4947	4948	0.000174171	8734	8735	0.000207402	3301	3302	7.69581e-05	872	873	2.4467e-05	3988	3989	8.66903e-05	666	667	1.55504e-05	5317	5318	0.000139772
CVFFYGLV	TGTGTATTCTTCTATGGGCTGGTG	Pool 13	2869	2870	7.0533e-05	720	721	1.44712e-05	295	296	6.56289e-06	3093	3094	6.15936e-05	203	204	5.19639e-06	618.5	1967	1968	6.92742e-05	3302	3303	7.84258e-05	239	240	5.59357e-06	17	18	5.04475e-07	70	71	1.543e-06	6652	6653	0.000155108	851	852	2.2393e-05
CVLAFTGV	TGCGTGCTAGCATTTACGGGCGTG	Pool 13	2716	2717	6.67729e-05	630	631	1.26648e-05	542	543	1.20394e-05	261	262	5.21575e-06	17	18	4.58505e-07	269.5	1543	1544	5.43493e-05	2902	2903	6.89283e-05	202	203	4.73122e-06	12	13	3.64343e-07	8	9	1.95591e-07	4	5	1.1657e-07	361	362	9.51439e-06
CVLTFLGL	TGTGTTTTGACATTCTTAGGTCTT	Pool 13	7916	7917	0.000194568	1784	1785	3.58268e-05	6685	6686	0.000148242	9351	9352	0.000186174	2856	2857	7.2775e-05	2411	5878	5879	0.000206943	7443	7444	0.000176749	996	997	2.32366e-05	2175	2176	6.09854e-05	264	265	5.75907e-06	726	727	1.69493e-05	2184	2185	5.7428e-05
CVPPYISM	TGCGTCCCACCGTATATAAGCATG	Pool 13	1713	1714	4.21232e-05	332	333	6.68366e-06	121	122	2.70498e-06	214	215	4.2801e-06	2498	2499	6.36558e-05	2261	963	964	3.39331e-05	2047	2048	4.86273e-05	489	490	1.14202e-05	4	5	1.40132e-07	45	46	9.99688e-07	1	2	4.66279e-08	244	245	6.4393e-06
CVTPFLTL	TGCGTAACTCCCTTTCTTACACTA	Pool 13	26533	26534	0.000652099	10455	10456	0.000209863	64808	64809	0.00143694	23904	23905	0.000475887	15461	15462	0.000393856	4374.5	16228	16229	0.000571266	27765	27766	0.00065927	25676	25677	0.000598442	5726	5727	0.000160507	23810	23811	0.000517469	25728	25729	0.000599845	17795	17796	0.00046773
CVYAYLIL	TGTGTGTACGCATATCTCATCCTC	Pool 13	4044	4045	9.94098e-05	828	829	1.66389e-05	4959	4960	0.000109973	633	634	1.26213e-05	5653	5654	0.000144022	3240	2416	2417	8.50792e-05	3090	3091	7.33921e-05	85	86	2.00436e-06	8	9	2.52237e-07	685	686	1.49084e-05	129	130	3.03082e-06	314	315	8.2791e-06
CVYCLAEV	TGTGTTTACTGCCTTGCAGAAGTT	Pool 13	5868	5869	0.000144236	16123	16124	0.000323626	4590	4591	0.000101791	4487	4488	8.93445e-05	1725	1726	4.39656e-05	1874.5	3918	3919	0.00013795	6274	6275	0.000148992	4238	4239	9.87964e-05	135	136	3.81159e-06	1036	1037	2.25364e-05	15294	15295	0.000356587	1116	1117	2.93579e-05
CVYDLCLL	TGCGTCTATGACCTCTGCCTCTTG	Pool 13	1244	1245	3.05971e-05	4	5	1.00355e-07	2236	2237	4.95986e-05	2	3	5.97223e-08	77	78	1.98686e-06	433	914	915	3.22083e-05	1299	1300	3.08669e-05	2041	2042	4.75919e-05	5289	5290	0.000148259	1	2	4.34647e-08	4	5	1.1657e-07	2815	2816	7.40125e-05
CVYFFKNL	TGTGTATATTTCTTTAAGAATTTA	Pool 13	5822	5823	0.000143106	800	801	1.60769e-05	3018	3019	6.69371e-05	4533	4534	9.02603e-05	7113	7114	0.000181211	3558.5	4096	4097	0.000144216	5535	5536	0.000131446	3062	3063	7.13879e-05	208	209	5.85751e-06	1734	1735	3.77056e-05	7627	7628	0.000177839	1870	1871	4.91752e-05
CVYSLLYL	TGCGTGTACTCCCTACTGTATTTA	Pool 13	5696	5697	0.000140009	3093	3094	6.20999e-05	17825	17826	0.000395237	2376	2377	4.73199e-05	3150	3151	8.02639e-05	2532	3642	3643	0.000128235	5943	5944	0.000141133	1934	1935	4.50981e-05	251	252	7.06264e-06	13904	13905	0.000302188	9	10	2.3314e-07	3420	3421	8.99136e-05
CWLAWSPL	TGTTGGTTAGCTTGGTCACCCCTA	Pool 13	5192	5193	0.000127623	831	832	1.66991e-05	2818	2819	6.25027e-05	1400	1401	2.78903e-05	2630	2631	6.70182e-05	2322.5	3696	3697	0.000130136	5036	5037	0.000119598	4106	4107	9.57199e-05	1065	1066	2.98761e-05	1437	1438	3.12511e-05	30	31	7.22733e-07	2813	2814	7.39599e-05
CYDAFAPL	TGTTATGACGCCTTTGCCCCTTTA	Pool 13	19926	19927	0.000489725	9878	9879	0.000198282	19885	19886	0.000440911	7583	7584	0.000150978	337706	337707	0.00860224	5008	11560	11561	0.000406951	19676	19677	0.000467207	14774	14775	0.000344354	32141	32142	0.000900824	11314	11315	0.000245901	9641	9642	0.000224793	93807	93808	0.00246554
CYGYFRKL	TGTTATGGTTATTTCAGAAAGTTG	Pool 13	6447	6448	0.000158466	74	75	1.50533e-06	1177	1178	2.61185e-05	3411	3412	6.79241e-05	4987	4988	0.000127057	3066	4386	4387	0.000154424	5785	5786	0.000137382	282	283	6.59575e-06	815	816	2.28695e-05	986	987	2.14498e-05	16	17	3.96337e-07	2174	2175	5.71652e-05
CYYLAHPL	TGTTATTATCTCGCGCACCCTCTT	Pool 13	10085	10086	0.000247873	2270	2271	4.55814e-05	6107	6108	0.000135426	3754	3755	7.47524e-05	10693	10694	0.000272403	4033	7492	7493	0.000263756	10288	10289	0.0002443	638	639	1.48929e-05	60643	60644	0.00169963	21740	21741	0.000472483	864	865	2.01666e-05	8099	8100	0.000212891
DFYMFSEL	GACTTTTACATGTTCTCCGAGTTG	Pool 13	14125	14126	0.00034716	8997	8998	0.000180599	2194	2195	4.86674e-05	15999	16000	0.000318519	14360	14361	0.000365811	4317	10639	10640	0.000374531	17901	17902	0.000425062	1581650	1581651	0.0368628	6532	6533	0.000183096	12140	12141	0.000263852	1631	1632	3.80484e-05	43500	43501	0.00114333
DIFNYQSL	GACATATTTAACTATCAGTCACTG	Pool 13	6088	6089	0.000149643	1570	1571	3.15316e-05	5968	5969	0.000132344	2274	2275	4.52894e-05	2637	2638	6.71965e-05	2328	4367	4368	0.000153755	6319	6320	0.000150061	2845	2846	6.63304e-05	2069	2070	5.80146e-05	806	807	1.7538e-05	3974	3975	9.2673e-05	11305	11306	0.000297154
DIYFTSPL	GATATTTATTTTACTTCTCCTCTC	Pool 13	44510	44511	0.0010939	73779	73780	0.00148084	32020	32021	0.000709967	19722	19723	0.000392634	57992	57993	0.00147723	4942	38194	38195	0.00134448	46075	46076	0.00109402	66480	66481	0.00154944	10668	10669	0.000299013	67907	67908	0.0014758	38743	38744	0.000903276	44763	44764	0.00117653
DIYSFSEL	GATATCTACTCTTTCAGTGAGTTA	Pool 13	53685	53686	0.00131939	14892	14893	0.000298918	76620	76621	0.00169884	24246	24247	0.000482695	23239	23240	0.000591981	4655	37890	37891	0.00133378	57239	57240	0.0013591	20909	20910	0.000487339	30550	30551	0.000856234	33080	33081	0.000718928	18531	18532	0.000432054	33364	33365	0.000876927
DNYCYFIL	GATAATTACTGCTACTTCATCCTC	Pool 13	9930	9931	0.000244064	45945	45946	0.000922185	34909	34910	0.000774022	30185	30186	0.000600926	10950	10951	0.000278949	4055	7032	7033	0.000247564	10566	10567	0.000250901	96026	96027	0.00223806	4919	4920	0.00013789	56526	56527	0.00122846	3413	3414	7.95939e-05	5983	5984	0.000157277
DNYMYLII	GATAATTACATGTATCTTATAATC	Pool 13	12996	12997	0.000319414	5607	5608	0.000112558	15522	15523	0.000344175	16214	16215	0.000322799	8342	8343	0.000212517	3737	8572	8573	0.000301772	11002	11003	0.000261253	41812	41813	0.000974516	457	458	1.28361e-05	26035	26036	0.000565823	16915	16916	0.000394379	40520	40521	0.00106501
DSFFFSLV	GATTCCTTCTTCTTCAGCCTGGTG	Pool 13	3466	3467	8.52049e-05	824	825	1.65586e-05	2153	2154	4.77583e-05	3106	3107	6.18524e-05	2160	2161	5.50461e-05	2101	2685	2686	9.4548e-05	3605	3606	8.56202e-05	2882	2883	6.71927e-05	14	15	4.20396e-07	4621	4622	0.000100447	398	399	9.30227e-06	3097	3098	8.14243e-05
DSLLYPSL	GACTCCTTGTTGTACCCAAGTCTG	Pool 13	5901	5902	0.000145047	279	280	5.6199e-06	8233	8234	0.000182564	4183	4184	8.32927e-05	8004	8005	0.000203907	3689	4251	4252	0.000149672	5819	5820	0.000138189	3961	3962	9.23405e-05	778	779	2.18325e-05	6717	6718	0.000145998	5032	5033	0.000117339	1823	1824	4.79399e-05
DSLYFMYL	GATTCTTTATACTTCATGTATCTG	Pool 13	6169	6170	0.000151634	3374	3375	6.77398e-05	14084	14085	0.000312292	6360	6361	0.000126631	7210	7211	0.000183682	3577	5947	5948	0.000209371	6646	6647	0.000157825	11019	11020	0.000256838	250	251	7.03462e-06	6638	6639	0.000144281	414	415	9.6753e-06	593	594	1.5612e-05
DSSFFAAL	GACAGCTCGTTCTTCGCCGCGCTG	Pool 13	413	414	1.01744e-05	NA	1	2.00711e-08	NA	1	2.21719e-08	109	110	2.18982e-06	217	218	5.55301e-06	635	279	280	9.85609e-06	696	697	1.65494e-05	2	3	6.99196e-08	4	5	1.40132e-07	594	595	1.29307e-05	NA	1	2.3314e-08	NA	1	2.62828e-08
DTFTYAKV	GATACGTTCACATACGCTAAAGTA	Pool 13	2527	2528	6.2128e-05	114	115	2.30817e-06	189	190	4.21267e-06	1317	1318	2.6238e-05	2563	2564	6.53115e-05	2292	1663	1664	5.85733e-05	3161	3162	7.50779e-05	479	480	1.11871e-05	12	13	3.64343e-07	78	79	1.71686e-06	1104	1105	2.57619e-05	2303	2304	6.05557e-05
DVFAFQVL	GATGTTTTCGCTTTCCAAGTTCTT	Pool 13	10944	10945	0.000268984	3688	3689	7.40421e-05	3671	3672	8.14153e-05	6074	6075	0.000120938	21860	21861	0.000556855	4611	7780	7781	0.000273894	11180	11181	0.000265479	11632	11633	0.000271125	6421	6422	0.000179985	11445	11446	0.000248748	3440	3441	8.02234e-05	4444	4445	0.000116827
DVWLFAPL	GACGTGTGGCTCTTTGCTCCTTTG	Pool 13	5030	5031	0.000123642	20526	20527	0.000411999	7857	7858	0.000174227	10837	10838	0.000215757	764	765	1.94865e-05	1193.5	2615	2616	9.2084e-05	3598	3599	8.54539e-05	389	390	9.08955e-06	341	342	9.58502e-06	2246	2247	4.88326e-05	891	892	2.07961e-05	4443	4444	0.000116801
EAFDYLHL	GAGGCGTTCGACTATCTCCATCTA	Pool 13	8335	8336	0.000204865	1873	1874	3.76132e-05	4225	4226	9.36986e-05	1878	1879	3.74061e-05	435	436	1.1106e-05	887.5	6053	6054	0.000213103	7807	7808	0.000185392	8	9	2.09759e-07	417	418	1.1715e-05	3363	3364	7.31076e-05	358	359	8.36971e-06	5378	5379	0.000141375
EAFHLALL	GAAGCCTTCCACCTGGCTCTACTA	Pool 13	10385	10386	0.000255246	1997	1998	4.0102e-05	2034	2035	4.51199e-05	3920	3921	7.8057e-05	11398	11399	0.000290361	4106	6343	6344	0.000223311	10562	10563	0.000250806	9582	9583	0.000223346	595	596	1.67037e-05	2268	2269	4.93107e-05	15220	15221	0.000354862	5610	5611	0.000147473
EAYKWYEL	GAGGCTTATAAGTGGTATGAATTG	Pool 13	7786	7787	0.000191373	600	601	1.20627e-05	18224	18225	0.000404083	5605	5606	0.000111601	2427	2428	6.18473e-05	2229.5	5186	5187	0.000182584	7793	7794	0.000185059	2936	2937	6.84513e-05	2087	2088	5.85191e-05	8417	8418	0.000182943	1587	1588	3.70226e-05	36300	36301	0.000954094
EIFMLSAL	GAAATCTTCATGCTGTCCGCGTTG	Pool 13	2355	2356	5.7901e-05	50	51	1.02362e-06	4	5	1.1086e-07	644	645	1.28403e-05	1676	1677	4.27174e-05	1850.5	1733	1734	6.10373e-05	2260	2261	5.36847e-05	146	147	3.42606e-06	153	154	4.31606e-06	3307	3308	7.18906e-05	63	64	1.49209e-06	261	262	6.88611e-06
EIISFQHL	GAGATAATTAGCTTTCAACACTTG	Pool 13	5412	5413	0.00013303	1184	1185	2.37842e-05	2751	2752	6.10171e-05	1065	1066	2.12213e-05	7065	7066	0.000179989	3552	4818	4819	0.00016963	5795	5796	0.000137619	1192	1193	2.78047e-05	55	56	1.56948e-06	1924	1925	4.18348e-05	277	278	6.48128e-06	5939	5940	0.00015612
EIMRFLSL	GAGATAATGCGGTTCTTAAGTCTA	Pool 13	7670	7671	0.000188522	2270	2271	4.55814e-05	13705	13706	0.000303888	4556	4557	9.07181e-05	1072	1073	2.7332e-05	1427	4276	4277	0.000150552	7617	7618	0.00018088	3112	3113	7.25532e-05	1261	1262	3.53693e-05	5732	5733	0.000124592	10463	10464	0.000243957	1472	1473	3.87146e-05
EIMSYVPL	GAAATCATGAGCTATGTTCCGTTG	Pool 13	4826	4827	0.000118628	2668	2669	5.35697e-05	346	347	7.69366e-06	1596	1597	3.17922e-05	9199	9200	0.000234347	3852	3223	3224	0.000113486	4454	4455	0.000105779	165	166	3.86888e-06	25	26	7.28686e-07	2185	2186	4.75069e-05	16	17	3.96337e-07	369	370	9.72465e-06
EIYSFGRV	GAGATATACAGTTTTGGCCGTGTT	Pool 13	1030	1031	2.53378e-05	110	111	2.22789e-06	532	533	1.18176e-05	297	298	5.93241e-06	1369	1370	3.48973e-05	1662.5	276	277	9.75049e-06	1040	1041	2.47173e-05	995	996	2.32133e-05	211	212	5.94159e-06	19304	19305	0.000419543	556	557	1.29859e-05	95	96	2.52315e-06
EMLKFLSL	GAGATGTTAAAGTTTCTGAGCCTA	Pool 13	3264	3265	8.02405e-05	92	93	1.86661e-06	3605	3606	7.9952e-05	415	416	8.28149e-06	322	323	8.22762e-06	765	2169	2170	7.63847e-05	3290	3291	7.81409e-05	2283	2284	5.32321e-05	303	304	8.52002e-06	1364	1365	2.96646e-05	55326	55327	0.00128989	347	348	9.14643e-06
ENLCFAGL	GAAAACCTATGCTTTGCAGGACTT	Pool 13	3554	3555	8.73675e-05	4	5	1.00355e-07	8777	8778	0.000194625	4358	4359	8.67765e-05	2667	2668	6.79607e-05	2339	2304	2305	8.11367e-05	4145	4146	9.84418e-05	1820	1821	4.24412e-05	54	55	1.54145e-06	3149	3150	6.84569e-05	1496	1497	3.4901e-05	580	581	1.52703e-05
EQFLYHLL	GAGCAATTCCTGTACCATTTACTC	Pool 13	14407	14408	0.00035409	4769	4770	9.57389e-05	20216	20217	0.00044825	5772	5773	0.000114926	10661	10662	0.000271588	4029	10023	10024	0.000352848	14433	14434	0.000342718	5160	5161	0.000120285	719	720	2.0179e-05	60858	60859	0.00132261	7525	7526	0.000175461	5306	5307	0.000139483
ESFMLASM	GAGTCGTTCATGCTGGCCTCAATG	Pool 13	485	486	1.19439e-05	2	3	6.02132e-08	NA	1	2.21719e-08	1	2	3.98148e-08	2	3	7.64175e-08	162.5	220	221	7.77927e-06	397	398	9.45003e-06	NA	1	2.33065e-08	2	3	8.40791e-08	2	3	6.5197e-08	NA	1	2.3314e-08	612	613	1.61114e-05
ESLRFLHV	GAGAGCTTGCGCTTTCTCCATGTG	Pool 13	2208	2209	5.42883e-05	19	20	4.01421e-07	969	970	2.15068e-05	5	6	1.19445e-07	283	284	7.23419e-06	715.5	1573	1574	5.54053e-05	1821	1822	4.32612e-05	10	11	2.56372e-07	4	5	1.40132e-07	837	838	1.82117e-05	5	6	1.39884e-07	486	487	1.27997e-05
ESMSYQKL	GAGAGCATGAGCTATCAGAAACTT	Pool 13	1659	1660	4.07961e-05	140	141	2.83002e-06	1710	1711	3.79362e-05	151	152	3.02593e-06	897	898	2.28743e-05	1295	1360	1361	4.79076e-05	1892	1893	4.4947e-05	6564	6565	0.000153007	10	11	3.0829e-07	27	28	6.08506e-07	340	341	7.95006e-06	53	54	1.41927e-06
ESRIFTFL	GAGTCTCGGATCTTTACCTTTCTT	Pool 13	20533	20534	0.000504643	53162	53163	0.00106704	3450	3451	7.65153e-05	45167	45168	0.000899179	29366	29367	0.000748051	4763	17009	17010	0.000598757	21270	21271	0.000505054	23688	23689	0.000552108	793	794	2.22529e-05	2896	2897	6.29586e-05	5185	5186	0.000120906	22583	22584	0.000593572
ESYFNSSL	GAGTCCTACTTTAATTCGAGCTTA	Pool 13	5202	5203	0.000127869	26025	26026	0.000522369	7139	7140	0.000158308	10598	10599	0.000210999	19522	19523	0.0004973	4537	4365	4366	0.000153685	5938	5939	0.000141014	172	173	4.03203e-06	4353	4354	0.000122027	4643	4644	0.000100925	6801	6802	0.000158582	786639	786640	0.0206751
ETFDYSQL	GAAACCTTTGACTATTCACAACTT	Pool 13	4614	4615	0.000113418	1613	1614	3.23947e-05	2960	2961	6.56511e-05	2099	2100	4.18056e-05	1091	1092	2.7816e-05	1443.5	3675	3676	0.000129396	5178	5179	0.000122969	1886	1887	4.39794e-05	34	35	9.80923e-07	96	97	2.10804e-06	1197	1198	2.79301e-05	4965	4966	0.000130521
ETFEHMPL	GAAACATTCGAGCACATGCCACTC	Pool 13	1768	1769	4.34749e-05	45	46	9.23269e-07	39	40	8.86877e-07	2057	2058	4.09695e-05	433	434	1.10551e-05	884	1320	1321	4.64996e-05	1212	1213	2.88012e-05	2	3	6.99196e-08	1041	1042	2.92035e-05	26	27	5.86773e-07	658	659	1.53639e-05	27	28	7.3592e-07
ETFNFCHL	GAGACGTTCAACTTCTGTCATTTG	Pool 13	3692	3693	9.0759e-05	540	541	1.08584e-05	1404	1405	3.11516e-05	353	354	7.04723e-06	2198	2199	5.6014e-05	2124	2619	2620	9.22248e-05	3910	3911	9.2862e-05	6	7	1.63146e-07	44	45	1.26119e-06	2030	2031	4.41384e-05	2836	2837	6.61417e-05	4771	4772	0.000125422
ETFNLHYL	GAAACATTTAATCTGCATTACCTG	Pool 13	11899	11900	0.000292454	42838	42839	0.000859824	5467	5468	0.000121236	6116	6117	0.000121774	11432	11433	0.000291227	4110	8496	8497	0.000299097	12211	12212	0.000289959	2615	2616	6.09699e-05	449	450	1.26119e-05	19307	19308	0.000419608	6748	6749	0.000157346	3404	3405	8.94931e-05
EVFNFLLV	GAGGTTTTCAATTTCCTCCTAGTC	Pool 13	22394	22395	0.000550379	5130	5131	0.000102985	150833	150834	0.00334428	13016	13017	0.000259135	22393	22394	0.000570431	4628	17162	17163	0.000604143	22966	22967	0.000545324	11615	11616	0.000270729	1163	1164	3.26227e-05	3459	3460	7.51939e-05	22773	22774	0.000530952	6062	6063	0.000159353
EVFPFSSV	GAAGTCTTTCCGTTCAGTTCTGTC	Pool 13	15225	15226	0.000374194	5645	5646	0.000113321	7697	7698	0.00017068	22625	22626	0.000450425	7025	7026	0.00017897	3535	10839	10840	0.000381571	15387	15388	0.00036537	3599	3600	8.39035e-05	349	350	9.80923e-06	3864	3865	8.39955e-05	32008	32009	0.000746257	6083	6084	0.000159905
EVYLFSHI	GAGGTGTACCTGTTTTCCCATATT	Pool 13	6018	6019	0.000147923	23521	23522	0.000472111	2043	2044	4.53194e-05	4683	4684	9.32464e-05	1236	1237	3.15095e-05	1559.5	4491	4492	0.00015812	6798	6799	0.000161434	2716	2717	6.33238e-05	80	81	2.27014e-06	848	849	1.84508e-05	1861	1862	4.34106e-05	1595	1596	4.19474e-05
FAAAHSNL	TTCGCCGCTGCTCACAGTAATCTC	Pool 13	283	284	6.97957e-06	66	67	1.34476e-06	123	124	2.74932e-06	206	207	4.12084e-06	31	32	8.1512e-07	311.5	90	91	3.20323e-06	398	399	9.47378e-06	979	980	2.28404e-05	566	567	1.5891e-05	316	317	6.88915e-06	20	21	4.89593e-07	6	7	1.8398e-07
FAFCASHV	TTCGCCTTTTGTGCGAGCCATGTT	Pool 13	2773	2774	6.81737e-05	33	34	6.82416e-07	23	24	5.32126e-07	524	525	1.04514e-05	7481	7482	0.000190585	3624	1842	1843	6.48742e-05	2531	2532	6.01193e-05	206	207	4.82445e-06	918	919	2.57562e-05	85	86	1.86898e-06	1	2	4.66279e-08	1930	1931	5.07522e-05
FAFLVSSL	TTCGCCTTCTTAGTGAGCTCGCTA	Pool 13	3567	3568	8.7687e-05	1929	1930	3.87371e-05	2051	2052	4.54968e-05	721	722	1.43732e-05	198	199	5.06903e-06	612	2227	2228	7.84263e-05	4168	4169	9.89879e-05	14148	14149	0.000329764	12	13	3.64343e-07	824	825	1.79292e-05	29	30	6.99419e-07	108	109	2.86483e-06
FAFNVTHL	TTCGCTTTTAATGTCACTCATTTA	Pool 13	13890	13891	0.000341385	11602	11603	0.000232884	3223	3224	7.14823e-05	2723	2724	5.42278e-05	13514	13515	0.000344261	4266	10761	10762	0.000378826	14058	14059	0.000333814	8620	8621	0.000200926	5060	5061	0.000141841	26319	26320	0.000571995	8578	8579	0.000200011	5509	5510	0.000144818
FAFQYNPS	TTCGCTTTTCAGTACAATCCTAGC	Pool 13	8778	8779	0.000215752	65	66	1.32469e-06	5197	5198	0.00011525	5969	5970	0.000118847	1979	1980	5.04356e-05	2017	6516	6517	0.0002294	8749	8750	0.000207758	740	741	1.72701e-05	675	676	1.89458e-05	7777	7778	0.000169034	87	88	2.05163e-06	6584	6585	0.000173073
FAFVEFEL	TTCGCATTCGTCGAATTTGAGTTG	Pool 13	3212	3213	7.89626e-05	478	479	9.61404e-06	280	281	6.23031e-06	528	529	1.0531e-05	2261	2262	5.76188e-05	2153	2559	2560	9.01128e-05	3085	3086	7.32734e-05	2140	2141	4.98993e-05	6138	6139	0.000172054	2742	2743	5.96118e-05	4	5	1.1657e-07	2100	2101	5.52203e-05
FAFVHVSF	TTTGCCTTTGTTCATGTCTCTTTT	Pool 13	28642	28643	0.000703929	60875	60876	0.00122185	22926	22927	0.000508336	53051	53052	0.00105613	37148	37149	0.000946278	4850	21046	21047	0.000740861	31824	31825	0.000755647	32384	32385	0.000754782	22851	22852	0.000640459	23564	23565	0.000512123	8766	8767	0.000204394	28558	28559	0.000750612
FAFVTGNL	TTTGCATTTGTAACAGGTAATCTA	Pool 13	13583	13584	0.00033384	4467	4468	8.96775e-05	5876	5877	0.000130304	19837	19838	0.000394923	30937	30938	0.000788068	4785	7964	7965	0.00028037	12166	12167	0.000288891	6008	6009	0.000140049	14194	14195	0.000397834	1109	1110	2.41229e-05	4617	4618	0.000107664	5114	5115	0.000134437
FAIIFFLM	TTTGCTATAATTTTCTTTCTAATG	Pool 13	14555	14556	0.000357728	3743	3744	7.5146e-05	23099	23100	0.000512172	12412	12413	0.000247111	22996	22997	0.000585791	4648	12461	12462	0.000438666	14874	14875	0.000353189	15103	15104	0.000352022	427	428	1.19953e-05	9183	9184	0.00019959	35564	35565	0.000829161	7903	7904	0.00020774
FALFLGNL	TTTGCACTTTTCCTTGGGAATCTG	Pool 13	10670	10671	0.00026225	1488	1489	2.98858e-05	4183	4184	9.27673e-05	8003	8004	0.000159339	3772	3773	9.61078e-05	2724	7902	7903	0.000278188	10977	10978	0.000260659	4184	4185	9.75378e-05	17604	17605	0.000493404	3532	3533	7.67804e-05	3708	3709	8.64715e-05	5195	5196	0.000136566
FALRVFSL	TTCGCCTTACGCGTCTTTTCGCTG	Pool 13	84	85	2.08896e-06	NA	1	2.00711e-08	NA	1	2.21719e-08	14	15	2.98611e-07	110	111	2.82745e-06	491	12	13	4.57604e-07	105	106	2.51684e-06	1	2	4.66131e-08	NA	1	2.80264e-08	NA	1	2.17323e-08	NA	1	2.3314e-08	54	55	1.44556e-06
FALVRTAL	TTCGCCTTAGTCCGCACTGCACTG	Pool 13	874	875	2.1504e-05	1	2	4.01421e-08	NA	1	2.21719e-08	154	155	3.08565e-06	259	260	6.62285e-06	679.5	1023	1024	3.60451e-05	1670	1671	3.96759e-05	NA	1	2.33065e-08	2	3	8.40791e-08	5	6	1.30394e-07	1	2	4.66279e-08	NA	1	2.62828e-08
FAMLATLL	TTCGCTATGTTAGCAACGCTTCTT	Pool 13	7678	7679	0.000188719	2853	2854	5.72828e-05	1558	1559	3.4566e-05	1311	1312	2.61185e-05	2299	2300	5.85868e-05	2166	5731	5732	0.000201768	8091	8092	0.000192135	2619	2620	6.10631e-05	1547	1548	4.33848e-05	1073	1074	2.33405e-05	1243	1244	2.90026e-05	2488	2489	6.5418e-05
FAMYCLLL	TTTGCCATGTATTGCCTTCTATTG	Pool 13	11497	11498	0.000282574	4564	4565	9.16244e-05	9699	9700	0.000215068	3428	3429	6.82626e-05	22878	22879	0.000582786	4643	6643	6644	0.000233871	12790	12791	0.000303707	2668	2669	6.22051e-05	16347	16348	0.000458175	3596	3597	7.81712e-05	3374	3375	7.86846e-05	4648	4649	0.000122189
FAPYFGHM	TTCGCGCCCTACTTCGGGCATATG	Pool 13	1317	1318	3.23911e-05	544	545	1.09387e-05	841	842	1.86688e-05	63	64	1.27408e-06	444	445	1.13353e-05	900	1022	1023	3.60099e-05	1836	1837	4.36174e-05	3	4	9.32261e-08	7	8	2.24211e-07	NA	1	2.17323e-08	6	7	1.63198e-07	287	288	7.56946e-06
FAQIFEPL	TTTGCGCAGATCTTTGAACCACTG	Pool 13	2287	2288	5.62298e-05	197	198	3.97407e-06	39	40	8.86877e-07	1	2	3.98148e-08	451	452	1.15136e-05	909	1422	1423	5.009e-05	2163	2164	5.13816e-05	1357	1358	3.16503e-05	468	469	1.31444e-05	300	301	6.54143e-06	2	3	6.99419e-08	525	526	1.38248e-05
FARSFHPM	TTTGCTCGAAGCTTCCACCCAATG	Pool 13	5790	5791	0.000142319	2070	2071	4.15672e-05	3711	3712	8.23022e-05	1316	1317	2.62181e-05	1292	1293	3.2936e-05	1597.5	3389	3390	0.000119329	5532	5533	0.000131374	2145	2146	5.00158e-05	680	681	1.9086e-05	628	629	1.36696e-05	359	360	8.39303e-06	2161	2162	5.68235e-05
FASLFFIL	TTTGCATCCCTCTTCTTCATCTTA	Pool 13	42037	42038	0.00103312	101213	101214	0.00203147	225944	225945	0.00500964	44154	44155	0.000879012	52381	52382	0.0013343	4931	32429	32430	0.00114155	46898	46899	0.00111356	28404	28405	0.000662022	832136	832137	0.0233218	212729	212730	0.00462312	45543	45544	0.00106181	9790	9791	0.000257335
FATFFPEI	TTTGCAACGTTCTTCCCAGAGATA	Pool 13	4325	4326	0.000106316	145	146	2.93037e-06	6745	6746	0.000149572	6639	6640	0.000132185	4480	4481	0.000114142	2941	2570	2571	9.05e-05	4531	4532	0.000107607	5468	5469	0.000127463	19	20	5.60527e-07	154	155	3.36851e-06	30	31	7.22733e-07	4451	4452	0.000117011
FAVLWLPL	TTTGCGGTCCTCTGGCTACCTCTG	Pool 13	1949	1950	4.79231e-05	161	162	3.25151e-06	230	231	5.12172e-06	1444	1445	2.87662e-05	1910	1911	4.8678e-05	1985.5	1830	1831	6.44518e-05	2307	2308	5.48007e-05	4027	4028	9.38787e-05	11	12	3.36316e-07	17	18	3.91182e-07	7	8	1.86512e-07	1071	1072	2.81752e-05
FAVLYTAI	TTCGCTGTCCTGTATACAGCTATC	Pool 13	9544	9545	0.000234578	287	288	5.78046e-06	7960	7961	0.000176511	8165	8166	0.000162564	10191	10192	0.000259616	3976	7243	7244	0.000254991	9995	9996	0.000237343	2100	2101	4.8967e-05	5122	5123	0.000143579	11884	11885	0.000258289	2061	2062	4.80734e-05	2360	2361	6.20538e-05
FAVNHFTL	TTTGCCGTGAATCATTTTACTTTG	Pool 13	7759	7760	0.000190709	3640	3641	7.30787e-05	7225	7226	0.000160214	2311	2312	4.6026e-05	4952	4953	0.000126165	3058	5275	5276	0.000185717	8144	8145	0.000193393	1280	1281	2.98557e-05	15176	15177	0.000425356	6196	6197	0.000134675	797	798	1.86045e-05	2452	2453	6.44718e-05
FAWFEYAL	TTCGCGTGGTTCGAATACGCTCTA	Pool 13	3656	3657	8.98743e-05	917	918	1.84252e-05	891	892	1.97774e-05	4823	4824	9.60334e-05	4474	4475	0.000113989	2940	2332	2333	8.21223e-05	3426	3427	8.137e-05	76	77	1.7946e-06	1701	1702	4.77009e-05	1958	1959	4.25737e-05	5	6	1.39884e-07	1493	1494	3.92666e-05
FAYIYFST	TTTGCTTACATATACTTTTCAACA	Pool 13	12537	12538	0.000308133	34381	34382	0.000690083	21992	21993	0.000487627	31562	31563	0.000628338	110163	110164	0.00280615	4988	8999	9000	0.000316803	14160	14161	0.000336236	3699	3700	8.62341e-05	600	601	1.68438e-05	3789	3790	8.23656e-05	11443	11444	0.000266805	5865	5866	0.000154175
FAYLREHF	TTTGCCTATCTCAGGGAACATTTC	Pool 13	2422	2423	5.95476e-05	113	114	2.2881e-06	686	687	1.52321e-05	469	470	9.35649e-06	777	778	1.98176e-05	1209	1537	1538	5.41381e-05	2642	2643	6.27549e-05	1518	1519	3.54026e-05	9	10	2.80264e-07	300	301	6.54143e-06	NA	1	2.3314e-08	3613	3614	9.49862e-05
FCMMFANM	TTCTGTATGATGTTTGCGAACATG	Pool 13	5636	5637	0.000138535	247	248	4.97762e-06	5208	5209	0.000115494	2605	2606	5.18787e-05	889	890	2.26705e-05	1290	3951	3952	0.000139112	5853	5854	0.000138996	3111	3112	7.25299e-05	3032	3033	8.5004e-05	5249	5250	0.000114095	584	585	1.36387e-05	1462	1463	3.84518e-05
FEKIILSN	TTCGAGAAAATAATACTCAGCAAC	Pool 13	11730	11731	0.000288301	16204	16205	0.000325251	5333	5334	0.000118265	8139	8140	0.000162046	13435	13436	0.000342249	4259	8391	8392	0.000295401	11586	11587	0.000275119	4913	4914	0.000114528	74	75	2.10198e-06	11457	11458	0.000249009	4143	4144	9.66131e-05	11611	11612	0.000305196
FFCLFSRL	TTCTTCTGTCTTTTCAGCCGGTTA	Pool 13	6318	6319	0.000155296	1448	1449	2.9083e-05	963	964	2.13737e-05	672	673	1.33977e-05	13583	13584	0.000346019	4276	5720	5721	0.000201381	7139	7140	0.000169531	2856	2857	6.65867e-05	753	754	2.11319e-05	5179	5180	0.000112574	2297	2298	5.35755e-05	783	784	2.06058e-05
FFFRVAAL	TTCTTCTTTCGGGTTGCTGCTTTA	Pool 13	10090	10091	0.000247996	8021	8022	0.00016101	1375	1376	3.05086e-05	6259	6260	0.00012462	4628	4629	0.000117912	2986	9045	9046	0.000318422	10641	10642	0.000252682	7193	7194	0.000167667	4070	4071	0.000114095	1388	1389	3.01862e-05	196	197	4.59285e-06	1851	1852	4.86758e-05
FFLYFGDL	TTCTTTCTTTACTTCGGTGACTTG	Pool 13	6588	6589	0.000161931	3285	3286	6.59535e-05	36594	36595	0.000811382	7611	7612	0.000151535	2190	2191	5.58103e-05	2118	6598	6599	0.000232287	6352	6353	0.000150844	1719	1720	4.00872e-05	60	61	1.70961e-06	1267	1268	2.75566e-05	2371	2372	5.53007e-05	5034	5035	0.000132334
FFLYHIHL	TTCTTTCTGTACCATATTCATCTC	Pool 13	17276	17277	0.000424599	3185	3186	6.39464e-05	4634	4635	0.000102767	5609	5610	0.000111681	6016	6017	0.000153268	3307	15774	15775	0.000555285	18290	18291	0.000434298	10649	10650	0.000248215	10746	10747	0.000301199	13527	13528	0.000293995	20579	20580	0.000479801	22462	22463	0.000590392
FFPSFCML	TTCTTTCCCTCGTTTTGTATGCTA	Pool 13	21841	21842	0.000536788	12864	12865	0.000258214	13877	13878	0.000307702	138388	138389	0.00275497	22169	22170	0.000564726	4622	18373	18374	0.000646771	23414	23415	0.000555961	10439	10440	0.00024332	639	640	1.79369e-05	16317	16318	0.000354628	2340	2341	5.4578e-05	6550	6551	0.000172179
FFRFMNVL	TTCTTTCGCTTCATGAACGTACTA	Pool 13	2386	2387	5.86628e-05	236	237	4.75684e-06	369	370	8.20361e-06	430	431	8.5801e-06	241	242	6.16435e-06	660.5	1943	1944	6.84294e-05	2357	2358	5.59879e-05	4	5	1.16533e-07	130	131	3.67145e-06	323	324	7.04128e-06	627	628	1.46412e-05	86	87	2.28661e-06
FFSFLGLL	TTCTTTAGCTTTCTGGGGCTATTA	Pool 13	6506	6507	0.000159916	2108	2109	4.23299e-05	6559	6560	0.000145448	3074	3075	6.12153e-05	2957	2958	7.53477e-05	2448.5	5322	5323	0.000187371	7436	7437	0.000176583	2301	2302	5.36516e-05	2463	2464	6.9057e-05	8316	8317	0.000180748	1357	1358	3.16604e-05	1099	1100	2.89111e-05
FGAKYVSL	TTCGGGGCAAAGTACGTTTCACTG	Pool 13	2928	2929	7.1983e-05	19857	19858	0.000398571	342	343	7.60497e-06	9973	9974	0.000198557	137	138	3.51521e-06	525	1752	1753	6.17061e-05	2576	2577	6.11878e-05	3200	3201	7.46042e-05	1839	1840	5.15685e-05	784	785	1.70599e-05	1458	1459	3.40151e-05	94	95	2.49687e-06
FGFFGTTV	TTTGGTTTCTTTGGTACTACAGTC	Pool 13	8997	8998	0.000221135	10314	10315	0.000207033	11616	11617	0.000257571	4169	4170	8.3014e-05	6663	6664	0.000169749	3454	6877	6878	0.000242108	8735	8736	0.000207426	2490	2491	5.80566e-05	1270	1271	3.56215e-05	4069	4070	8.84506e-05	603	604	1.40816e-05	3815	3816	0.000100295
FGFFTPLL	TTTGGGTTCTTTACCCCTCTTCTG	Pool 13	6684	6685	0.00016429	3717	3718	7.46242e-05	14568	14569	0.000323023	729	730	1.45324e-05	9217	9218	0.000234806	3856	5280	5281	0.000185893	6492	6493	0.000154169	565	566	1.31915e-05	1243	1244	3.48648e-05	8959	8960	0.000194722	23767	23768	0.000554126	5023	5024	0.000132045
FGFLSGML	TTCGGTTTCCTTAGTGGTATGTTG	Pool 13	34605	34606	0.000850476	14838	14839	0.000297834	17090	17091	0.00037894	17344	17345	0.000345294	31470	31471	0.000801645	4799	27463	27464	0.000966741	35655	35656	0.000846609	32829	32830	0.000765153	17872	17873	0.000500915	57840	57841	0.00125702	47852	47853	0.00111564	36489	36490	0.000959061
FGGCFAQM	TTCGGAGGGTGCTTTGCCCAAATG	Pool 13	1388	1389	3.4136e-05	4078	4079	8.18698e-05	3	4	8.86877e-08	11	12	2.38889e-07	1150	1151	2.93189e-05	1487.5	706	707	2.48866e-05	1237	1238	2.93948e-05	222	223	5.19736e-06	2490	2491	6.98137e-05	366	367	7.97577e-06	118	119	2.77436e-06	2045	2046	5.37747e-05
FGIYSSFL	TTTGGCATATACTCTAGTTTCTTA	Pool 13	4289	4290	0.000105431	1165	1166	2.34029e-05	1901	1902	4.2171e-05	3699	3700	7.36575e-05	1737	1738	4.42712e-05	1879	1914	1915	6.74086e-05	5088	5089	0.000120832	1589	1590	3.70574e-05	1382	1383	3.87605e-05	3345	3346	7.27164e-05	3325	3326	7.75422e-05	3239	3240	8.51564e-05
FGLIWGLM	TTTGGCCTAATTTGGGGTCTTATG	Pool 13	117	118	2.89996e-06	259	260	5.21847e-06	NA	1	2.21719e-08	289	290	5.77315e-06	36	37	9.42483e-07	328.5	32	33	1.16161e-06	87	88	2.08945e-06	464	465	1.08375e-05	3	4	1.12105e-07	50	51	1.10835e-06	2	3	6.99419e-08	5	6	1.57697e-07
FGLVFDHV	TTCGGACTAGTCTTTGATCACGTC	Pool 13	3680	3681	9.04641e-05	150	151	3.03073e-06	3892	3893	8.63153e-05	8461	8462	0.000168457	1714	1715	4.36854e-05	1869	2403	2404	8.46216e-05	3910	3911	9.2862e-05	586	587	1.36809e-05	55	56	1.56948e-06	691	692	1.50388e-05	160	161	3.75355e-06	6999	7000	0.00018398
FGMSVFNL	TTCGGTATGTCTGTGTTCAACCTA	Pool 13	40013	40014	0.000983383	192307	192308	0.00385982	30815	30816	0.00068325	16682	16683	0.000332116	11500	11501	0.000292959	4115	27862	27863	0.000980786	39844	39845	0.000946072	19135	19136	0.000445994	25352	25353	0.000710553	10299	10300	0.000223843	4422	4423	0.000103118	15853	15854	0.000416688
FGPFFCIL	TTCGGACCCTTCTTTTGCATATTG	Pool 13	NA	1	2.4576e-08	NA	1	2.00711e-08	1	2	4.43439e-08	NA	1	1.99074e-08	NA	1	2.54725e-08	64	1	2	7.04006e-08	1	2	4.74876e-08	1	2	4.66131e-08	1	2	5.60527e-08	2	3	6.5197e-08	NA	1	2.3314e-08	NA	1	2.62828e-08
FGPYHIGL	TTTGGACCTTACCACATAGGACTG	Pool 13	171	172	4.22707e-06	508	509	1.02162e-05	383	384	8.51402e-06	NA	1	1.99074e-08	7	8	2.0378e-07	224	62	63	2.21762e-06	141	142	3.37162e-06	165	166	3.86888e-06	NA	1	2.80264e-08	9	10	2.17323e-07	9	10	2.3314e-07	16	17	4.46808e-07
FGQRYIHI	TTCGGACAGCGATACATACATATT	Pool 13	10034	10035	0.00024662	102916	102917	0.00206565	108310	108311	0.00240146	18356	18357	0.000365441	15205	15206	0.000387335	4362	6923	6924	0.000243727	11337	11338	0.000269207	10414	10415	0.000242737	1941	1942	5.44272e-05	7703	7704	0.000167426	2886	2887	6.73074e-05	7740	7741	0.000203456
FGTVYTML	TTCGGTACGGTATACACTATGTTG	Pool 13	5409	5410	0.000132956	1974	1975	3.96403e-05	550	551	1.22167e-05	968	969	1.92903e-05	209	210	5.34923e-06	625	3779	3780	0.000133057	5594	5595	0.000132847	16	17	3.96211e-07	23	24	6.72633e-07	63	64	1.39087e-06	48347	48348	0.00112718	69	70	1.8398e-06
FGYELAVI	TTTGGTTATGAGTTAGCAGTAATA	Pool 13	15484	15485	0.000380559	33178	33179	0.000665938	4778	4779	0.00010596	6142	6143	0.000122291	8830	8831	0.000224948	3801	10813	10814	0.000380656	15807	15808	0.000375342	5778	5779	0.000134688	228	229	6.41804e-06	18367	18368	0.00039918	7334	7335	0.000171008	13739	13740	0.000361126
FGYKEIPM	TTCGGGTATAAAGAGATTCCGATG	Pool 13	1619	1620	3.98131e-05	NA	1	2.00711e-08	3	4	8.86877e-08	1	2	3.98148e-08	479	480	1.22268e-05	935	1626	1627	5.72709e-05	2003	2004	4.75826e-05	286	287	6.68897e-06	353	354	9.92133e-06	284	285	6.19372e-06	813	814	1.89776e-05	3	4	1.05131e-07
FGYMVSSI	TTTGGCTATATGGTTTCCTCCATA	Pool 13	3349	3350	8.23295e-05	772	773	1.55149e-05	2647	2648	5.87113e-05	2226	2227	4.43338e-05	1338	1339	3.41077e-05	1639	933	934	3.28771e-05	3283	3284	7.79746e-05	947	948	2.20946e-05	439	440	1.23316e-05	1555	1556	3.38155e-05	2340	2341	5.4578e-05	696	697	1.83191e-05
FGYRKTPI	TTCGGGTACAGGAAAACGCCTATC	Pool 13	778	779	1.91447e-05	2	3	6.02132e-08	63	64	1.419e-06	39	40	7.96297e-07	56	57	1.45193e-06	379	414	415	1.46081e-05	776	777	1.84489e-05	4	5	1.16533e-07	4	5	1.40132e-07	11	12	2.60788e-07	1	2	4.66279e-08	10	11	2.89111e-07
FGYTSYSV	TTTGGTTACACATCCTATAGTGTT	Pool 13	10294	10295	0.00025301	622658	622659	0.0124974	3255	3256	7.21918e-05	33854	33855	0.000673966	4676	4677	0.000119135	2999	6566	6567	0.00023116	10400	10401	0.000246959	860	861	2.00669e-05	5410	5411	0.000151651	1142	1143	2.48401e-05	15776	15777	0.000367824	1758	1759	4.62315e-05
FHFPIYYL	TTTCACTTCCCTATCTATTACCTC	Pool 13	28468	28469	0.000699653	14454	14455	0.000290127	15006	15007	0.000332734	16664	16665	0.000331757	27790	27791	0.000707907	4737	22976	22977	0.000808798	30123	30124	0.000715258	48443	48444	0.00112906	23278	23279	0.000652426	16453	16454	0.000357584	20141	20142	0.00046959	20865	20866	0.000548418
FHFRFWHF	TTTCATTTCCGCTTTTGGCATTTC	Pool 13	9856	9857	0.000242245	158	159	3.1913e-06	2627	2628	5.82678e-05	9031	9032	0.000179804	3045	3046	7.75893e-05	2489.5	4629	4630	0.000162977	9850	9851	0.0002339	1929	1930	4.49816e-05	3361	3362	9.42246e-05	952	953	2.07109e-05	3699	3700	8.62617e-05	8646	8647	0.000227268
FHVLYSSL	TTTCACGTCTTATACTCTTCACTG	Pool 13	7332	7333	0.000180216	1985	1986	3.98611e-05	7188	7189	0.000159394	30363	30364	0.000604469	5366	5367	0.000136711	3161	6194	6195	0.000218066	8222	8223	0.000195245	3289	3290	7.66785e-05	4983	4984	0.000139683	1776	1777	3.86184e-05	1261	1262	2.94222e-05	2912	2913	7.65619e-05
FIFFTALV	TTTATTTTCTTCACAGCGCTAGTA	Pool 13	2821	2822	6.93534e-05	423	424	8.51013e-06	1839	1840	4.07963e-05	978	979	1.94894e-05	1063	1064	2.71027e-05	1420	1997	1998	7.03302e-05	2686	2687	6.37996e-05	136	137	3.19299e-06	12	13	3.64343e-07	218	219	4.75938e-06	1703	1704	3.9727e-05	187	188	4.94118e-06
FIFGFNVI	TTTATCTTTGGTTTCAATGTTATA	Pool 13	10074	10075	0.000247603	203	204	4.0945e-06	16020	16021	0.000355216	9054	9055	0.000180262	4616	4617	0.000117607	2982	7954	7955	0.000280018	9596	9597	0.000227869	4525	4526	0.000105485	102	103	2.88672e-06	16515	16516	0.000358931	8095	8096	0.00018875	9320	9321	0.000244982
FIFGYTKI	TTTATCTTTGGCTATACTAAAATA	Pool 13	3401	3402	8.36074e-05	1311	1312	2.63332e-05	11829	11830	0.000262294	1139	1140	2.26945e-05	13613	13614	0.000346783	4278	1665	1666	5.86437e-05	2808	2809	6.66963e-05	5556	5557	0.000129514	12	13	3.64343e-07	5669	5670	0.000123222	1440	1441	3.35954e-05	1331	1332	3.50088e-05
FIFRGAQI	TTCATATTCCGCGGAGCACAAATC	Pool 13	2944	2945	7.23762e-05	344	345	6.92451e-06	1104	1105	2.45e-05	155	156	3.10556e-06	1844	1845	4.69968e-05	1950.5	1787	1788	6.29382e-05	3053	3054	7.25136e-05	270	271	6.31607e-06	295	296	8.2958e-06	4584	4585	9.96428e-05	772	773	1.80217e-05	1757	1758	4.62052e-05
FIFSFHNA	TTCATATTCTCATTTCACAACGCT	Pool 13	4821	4822	0.000118505	3598	3599	7.22357e-05	379	380	8.42533e-06	6200	6201	0.000123446	8729	8730	0.000222375	3783	4266	4267	0.0001502	4907	4908	0.000116535	18021	18022	0.00042003	23	24	6.72633e-07	4358	4359	9.47313e-05	5991	5992	0.000139697	1239	1240	3.25907e-05
FIHNWPQL	TTTATCCATAACTGGCCCCAGCTT	Pool 13	2832	2833	6.96237e-05	1779	1780	3.57265e-05	1024	1025	2.27262e-05	636	637	1.2681e-05	103	104	2.64914e-06	483	2020	2021	7.11398e-05	3121	3122	7.41282e-05	2	3	6.99196e-08	367	368	1.03137e-05	368	369	8.01923e-06	3157	3158	7.36255e-05	1310	1311	3.44568e-05
FIHTFTAM	TTTATACATACATTCACCGCTATG	Pool 13	1340	1341	3.29564e-05	63	64	1.28455e-06	31	32	7.09502e-07	68	69	1.37361e-06	88	89	2.26705e-06	455	981	982	3.45667e-05	1508	1509	3.58294e-05	NA	1	2.33065e-08	6	7	1.96185e-07	4259	4260	9.25798e-05	281	282	6.57454e-06	132	133	3.49562e-06
FIKSFQAL	TTCATCAAATCGTTTCAGGCTCTT	Pool 13	3430	3431	8.43201e-05	21	22	4.41563e-07	7805	7806	0.000173074	457	458	9.1176e-06	781	782	1.99195e-05	1214	2113	2114	7.44135e-05	3347	3348	7.94943e-05	546	547	1.27487e-05	394	395	1.10704e-05	286	287	6.23718e-06	42	43	1.0025e-06	485	486	1.27735e-05
FILLFSKV	TTCATCTTATTGTTTTCAAAGGTT	Pool 13	22158	22159	0.000544579	3756	3757	7.5407e-05	10771	10772	0.000238836	2973	2974	5.92047e-05	23753	23754	0.000605074	4667	15966	15967	0.000562043	20694	20695	0.000491378	8411	8412	0.000196054	2769	2770	7.7633e-05	8484	8485	0.000184399	14156	14157	0.000330056	18650	18651	0.000490201
FILYSYYL	TTCATCTTGTACAGCTACTATCTA	Pool 13	11394	11395	0.000280043	1612	1613	3.23746e-05	2351	2352	5.21484e-05	1552	1553	3.09162e-05	1372	1373	3.49738e-05	1665.5	8409	8410	0.000296035	12310	12311	0.00029231	6443	6444	0.000150187	8170	8171	0.000229003	5257	5258	0.000114269	57052	57053	0.00133013	10097	10098	0.000265404
FIMIFVTL	TTTATTATGATCTTCGTAACTCTC	Pool 13	8854	8855	0.00021762	3150	3151	6.32439e-05	3450	3451	7.65153e-05	5222	5223	0.000103976	4416	4417	0.000112512	2921	7683	7684	0.000270479	9161	9162	0.000217541	10021	10022	0.000233578	155	156	4.37211e-06	2111	2112	4.58987e-05	20514	20515	0.000478286	4406	4407	0.000115829
FIQFFQDL	TTTATTCAATTCTTTCAAGACTTG	Pool 13	7381	7382	0.00018142	6564	6565	0.000131766	1753	1754	3.88896e-05	2419	2420	4.8176e-05	2956	2957	7.53222e-05	2446.5	5611	5612	0.000197544	7376	7377	0.000175158	3936	3937	9.17578e-05	26958	26959	0.000755563	3948	3949	8.5821e-05	669	670	1.56204e-05	2403	2404	6.3184e-05
FISHYTLL	TTCATCTCACATTATACTCTGTTA	Pool 13	25656	25657	0.000630545	6610	6611	0.00013269	12790	12791	0.000283601	8516	8517	0.000169552	40847	40848	0.0010405	4873	17271	17272	0.00060798	25659	25660	0.000609266	6457	6458	0.000150514	1462	1463	4.10026e-05	10328	10329	0.000224473	20903	20904	0.000487355	11937	11938	0.000313765
FISMFYIL	TTTATTTCAATGTTTTATATCCTG	Pool 13	5782	5783	0.000142123	6892	6893	0.00013835	1885	1886	4.18163e-05	2738	2739	5.45264e-05	5302	5303	0.000135081	3141	5870	5871	0.000206661	6497	6498	0.000154287	32433	32434	0.000755924	300	301	8.43594e-06	26482	26483	0.000575538	25015	25016	0.000583222	8405	8406	0.000220934
FIYAWSGF	TTTATATATGCGTGGAGCGGCTTT	Pool 13	2681	2682	6.59127e-05	239	240	4.81705e-06	1512	1513	3.35461e-05	182	183	3.64306e-06	100	101	2.57272e-06	478.5	2024	2025	7.12806e-05	3324	3325	7.89481e-05	50	51	1.18863e-06	16	17	4.76448e-07	1655	1656	3.59888e-05	362	363	8.46297e-06	112	113	2.96996e-06
FIYQYWKL	TTTATCTACCAGTACTGGAAACTT	Pool 13	6611	6612	0.000162496	854	855	1.71608e-05	7404	7405	0.000164183	2789	2790	5.55417e-05	1209	1210	3.08217e-05	1531.5	4562	4563	0.000160619	6205	6206	0.000147354	4907	4908	0.000114388	367	368	1.03137e-05	7890	7891	0.00017149	5183	5184	0.00012086	2896	2897	7.61414e-05
FIYTSKLL	TTTATCTATACTAGTAAGCTATTG	Pool 13	17816	17817	0.00043787	1683	1684	3.37997e-05	10339	10340	0.000229258	4581	4582	9.12158e-05	5391	5392	0.000137348	3172.5	13358	13359	0.000470241	17700	17701	0.000420289	7762	7763	0.000180929	4120	4121	0.000115497	5517	5518	0.000119919	16664	16665	0.000388527	15124	15125	0.000397528
FKYTFHQV	TTCAAGTATACGTTCCACCAAGTC	Pool 13	4379	4380	0.000107643	42	43	8.63055e-07	347	348	7.71583e-06	3291	3292	6.55352e-05	1945	1946	4.95695e-05	1998.5	3052	3053	0.000107467	4546	4547	0.000107963	789	790	1.84122e-05	2676	2677	7.50266e-05	2716	2717	5.90468e-05	552	553	1.28926e-05	760	761	2.00012e-05
FLALFRLL	TTTCTGGCCCTTTTCCGACTGCTT	Pool 13	14195	14196	0.00034888	2481	2482	4.98164e-05	10769	10770	0.000238792	20705	20706	0.000412203	6882	6883	0.000175327	3498	10250	10251	0.000360838	15043	15044	0.000357202	38585	38586	0.000899306	990	991	2.77741e-05	29246	29247	0.000635606	2605	2606	6.07562e-05	17974	17975	0.000472434
FLALYAFL	TTCCTGGCCCTCTACGCGTTCCTA	Pool 13	5221	5222	0.000128336	2345	2346	4.70867e-05	2922	2923	6.48085e-05	270	271	5.39491e-06	18407	18408	0.000468898	4498	4225	4226	0.000148757	5891	5892	0.000139898	3544	3545	8.26216e-05	621	622	1.74324e-05	130	131	2.84694e-06	680	681	1.58768e-05	1993	1994	5.2408e-05
FLFKVLNL	TTCCTGTTTAAAGTCCTGAATCTA	Pool 13	14816	14817	0.000364142	2510	2511	5.03984e-05	9858	9859	0.000218593	6911	6912	0.0001376	12080	12081	0.000307733	4171	11040	11041	0.000388647	16656	16657	0.000395501	11123	11124	0.000259262	971	972	2.72416e-05	6135	6136	0.00013335	15063	15064	0.000351202	12487	12488	0.00032822
FLFLTYLL	TTCTTATTCCTAACATATCTGCTT	Pool 13	11391	11392	0.000279969	4797	4798	9.63009e-05	5802	5803	0.000128664	3875	3876	7.71612e-05	13511	13512	0.000344185	4265	9104	9105	0.000320499	11474	11475	0.00027246	5587	5588	0.000130237	954	955	2.67652e-05	7226	7227	0.00015706	7374	7375	0.00017194	2203	2204	5.79274e-05
FLFSFKDI	TTCTTATTTAGCTTTAAAGATATT	Pool 13	12507	12508	0.000307396	1930	1931	3.87572e-05	2546	2547	5.64719e-05	4820	4821	9.59737e-05	16969	16970	0.000432268	4442	10306	10307	0.00036281	11560	11561	0.000274502	7799	7800	0.000181791	18726	18727	0.00052485	3020	3021	6.56534e-05	4248	4249	9.9061e-05	2473	2474	6.50238e-05
FLFTPFKL	TTCTTATTCACTCCATTTAAGCTC	Pool 13	17885	17886	0.000439566	9016	9017	0.000180981	14280	14281	0.000316637	81363	81364	0.00161975	12642	12643	0.000322049	4206	15580	15581	0.000548456	17766	17767	0.000421856	10274	10275	0.000239475	1693	1694	4.74767e-05	7444	7445	0.000161797	3665	3666	8.5469e-05	5254	5255	0.000138116
FLSNFSFL	TTTCTATCCAACTTCTCCTTCTTA	Pool 13	10596	10597	0.000260431	5198	5199	0.000104349	6970	6971	0.000154561	18283	18284	0.000363987	9351	9352	0.000238219	3879	8933	8934	0.00031448	12318	12319	0.0002925	6578	6579	0.000153334	475	476	1.33406e-05	324	325	7.06301e-06	10522	10523	0.000245333	3329	3330	8.75219e-05
FLTIFPPL	TTCTTGACTATCTTCCCACCTCTG	Pool 13	11029	11030	0.000271073	4046	4047	8.12276e-05	8263	8264	0.000183229	7723	7724	0.000153765	3135	3136	7.98818e-05	2525.5	9800	9801	0.000344998	11411	11412	0.000270964	4533	4534	0.000105672	28957	28958	0.000811588	8903	8904	0.000193505	5582	5583	0.000130162	3815	3816	0.000100295
FLYPAAQL	TTTCTTTACCCGGCGGCTCAACTA	Pool 13	1730	1731	4.2541e-05	5651	5652	0.000113442	408	409	9.06832e-06	127	128	2.54815e-06	2042	2043	5.20403e-05	2040	1210	1211	4.26276e-05	1508	1509	3.58294e-05	5	6	1.39839e-07	687	688	1.92821e-05	98	99	2.1515e-06	49	50	1.1657e-06	15	16	4.20526e-07
FLYPWQPL	TTCCTATATCCGTGGCAACCTCTT	Pool 13	4431	4432	0.000108921	23362	23363	0.00046892	2911	2912	6.45647e-05	3922	3923	7.80968e-05	1132	1133	2.88604e-05	1475.5	2953	2954	0.000103982	4974	4975	0.000118125	51	52	1.21194e-06	2293	2294	6.42925e-05	902	903	1.96243e-05	899	900	2.09826e-05	586	587	1.5428e-05
FLYRKFLF	TTCCTTTATAGGAAGTTCCTTTTC	Pool 13	5270	5271	0.00012954	1984	1985	3.9841e-05	27110	27111	0.000601103	1906	1907	3.79635e-05	2049	2050	5.22186e-05	2045.5	4546	4547	0.000160056	5569	5570	0.000132253	1616	1617	3.76867e-05	24	25	7.00659e-07	16304	16305	0.000354346	1428	1429	3.33157e-05	6255	6256	0.000164425
FMALWAVL	TTTATGGCATTATGGGCGGTGCTT	Pool 13	9951	9952	0.00024458	5359	5360	0.000107581	14018	14019	0.000310828	36993	36994	0.000736455	2615	2616	6.66361e-05	2314	7212	7213	0.0002539	9289	9290	0.00022058	87261	87262	0.00203377	2493	2494	6.98978e-05	3690	3691	8.02141e-05	11264	11265	0.000262632	32853	32854	0.000863497
FMDLYSHL	TTCATGGATTTGTACTCGCACCTG	Pool 13	8215	8216	0.000201916	63714	63715	0.00127883	59243	59244	0.00131355	2962	2963	5.89857e-05	7004	7005	0.000178435	3528	5697	5698	0.000200571	8632	8633	0.00020498	3649	3650	8.50688e-05	3584	3585	0.000100475	9750	9751	0.000211912	1374	1375	3.20567e-05	8639	8640	0.000227084
FMDSYRYL	TTCATGGATTCATACAGGTATTTA	Pool 13	131651	131652	0.00323547	78715	78716	0.00157991	136613	136614	0.003029	137068	137069	0.00272869	115159	115160	0.00293341	4991	84505	84506	0.00297464	130060	130061	0.00308814	65519	65520	0.00152704	42727	42728	0.00119751	129586	129587	0.00281623	158875	158876	0.00370403	82375	82376	0.00216508
FMITRFFL	TTTATGATAACTCGCTTCTTTCTG	Pool 13	17519	17520	0.000430571	5019	5020	0.000100757	20943	20944	0.000464369	14119	14120	0.000281093	13522	13523	0.000344465	4268	15448	15449	0.00054381	19026	19027	0.000451773	12197	12198	0.000284293	2114	2115	5.92758e-05	13848	13849	0.000300971	27238	27239	0.000635049	18064	18065	0.0004748
FMLFLASL	TTCATGTTGTTTCTCGCGAGTCTA	Pool 13	9830	9831	0.000241606	1915	1916	3.84561e-05	3925	3926	8.7047e-05	5320	5321	0.000105927	1243	1244	3.16878e-05	1564	7617	7618	0.000268156	10002	10003	0.000237509	2519	2520	5.87324e-05	1228	1229	3.44444e-05	13949	13950	0.000303166	2805	2806	6.5419e-05	5688	5689	0.000149523
FMYAPAIL	TTTATGTACGCTCCAGCGATTCTC	Pool 13	4582	4583	0.000112632	4831	4832	9.69834e-05	13879	13880	0.000307746	5328	5329	0.000106087	10491	10492	0.000267258	4008	3000	3001	0.000105636	4592	4593	0.000109055	1436	1437	3.34915e-05	827	828	2.32058e-05	6236	6237	0.000135545	8	9	2.09826e-07	2862	2863	7.52478e-05
FMYVFYLL	TTCATGTATGTCTTCTACCTTCTG	Pool 13	10036	10037	0.000246669	661	662	1.3287e-05	4197	4198	9.30778e-05	7944	7945	0.000158164	11541	11542	0.000294004	4120	8269	8270	0.000291107	10108	10109	0.000240026	9149	9150	0.000213255	56	57	1.5975e-06	5526	5527	0.000120115	4075	4076	9.50277e-05	10282	10283	0.000270267
FNFGYAKA	TTTAACTTCGGGTACGCTAAGGCG	Pool 13	981	982	2.41336e-05	4	5	1.00355e-07	37	38	8.42533e-07	161	162	3.225e-06	3957	3958	0.00010082	2789	451	452	1.59105e-05	594	595	1.41276e-05	264	265	6.17623e-06	NA	1	2.80264e-08	2153	2154	4.68115e-05	NA	1	2.3314e-08	10	11	2.89111e-07
FNISYIVV	TTTAACATCTCTTACATAGTCGTA	Pool 13	16142	16143	0.00039673	6500	6501	0.000130482	19578	19579	0.000434104	9072	9073	0.00018062	3947	3948	0.000100565	2787	12443	12444	0.000438033	16410	16411	0.00038966	11713	11714	0.000273013	320733	320734	0.00898901	7519	7520	0.000163427	19750	19751	0.000460474	9292	9293	0.000244246
FNITKAPL	TTTAATATAACAAAGGCGCCGCTC	Pool 13	1377	1378	3.38657e-05	312	313	6.28224e-06	55	56	1.24163e-06	32	33	6.56945e-07	39	40	1.0189e-06	344	998	999	3.51651e-05	1541	1542	3.66129e-05	22266	22267	0.000518966	3	4	1.12105e-07	51	52	1.13008e-06	83	84	1.95837e-06	693	694	1.82403e-05
FNLVYENL	TTTAACTTAGTATATGAAAACTTG	Pool 13	7339	7340	0.000180388	302	303	6.08153e-06	6184	6185	0.000137133	4015	4016	7.99482e-05	3793	3794	9.66427e-05	2736.5	5156	5157	0.000181528	6748	6749	0.000160247	5135	5136	0.000119702	183	184	5.15685e-06	6738	6739	0.000146454	809	810	1.88843e-05	835	836	2.19725e-05
FNQAFGFM	TTTAACCAAGCATTTGGGTTTATG	Pool 13	5333	5334	0.000131088	423	424	8.51013e-06	10609	10610	0.000235244	436	437	8.69954e-06	2762	2763	7.03805e-05	2382	3305	3306	0.000116372	5035	5036	0.000119574	4642	4643	0.000108212	13	14	3.92369e-07	11367	11368	0.000247053	159	160	3.73023e-06	1578	1579	4.15006e-05
FNQFMMLL	TTTAACCAATTTATGATGCTCCTG	Pool 13	8128	8129	0.000199778	6230	6231	0.000125063	2929	2930	6.49637e-05	5978	5979	0.000119026	17161	17162	0.000437159	4451	6303	6304	0.000221903	8272	8273	0.000196432	13752	13753	0.000320535	14390	14391	0.000403327	987	988	2.14716e-05	90	91	2.12157e-06	36936	36937	0.000970809
FNSIYALI	TTTAATTCAATCTACGCACTGATC	Pool 13	11648	11649	0.000286285	7182	7183	0.00014417	3398	3399	7.53624e-05	6468	6469	0.000128781	5245	5246	0.000133629	3124	8763	8764	0.000308496	12453	12454	0.000295705	10202	10203	0.000237796	306	307	8.60409e-06	683	684	1.48649e-05	30098	30099	0.000701727	42874	42875	0.00112688
FNWPYMSI	TTCAACTGGCCGTACATGAGTATC	Pool 13	7329	7330	0.000180142	1935	1936	3.88576e-05	6393	6394	0.000141767	9647	9648	0.000192067	5565	5566	0.00014178	3218	4769	4770	0.000167905	6774	6775	0.000160864	2896	2897	6.7519e-05	27	28	7.84738e-07	7338	7339	0.000159494	313	314	7.32059e-06	4233	4234	0.000111282
FNYGMQPL	TTCAATTACGGGATGCAGCCCCTG	Pool 13	1614	1615	3.96902e-05	1973	1974	3.96203e-05	5377	5378	0.000119241	17156	17157	0.000341552	2057	2058	5.24224e-05	2052	1310	1311	4.61476e-05	1852	1853	4.39973e-05	3	4	9.32261e-08	342	343	9.61304e-06	1963	1964	4.26823e-05	5	6	1.39884e-07	64	65	1.70838e-06
FNYILSMM	TTCAATTATATTCTGTCGATGATG	Pool 13	15631	15632	0.000384171	2700	2701	5.42119e-05	15280	15281	0.000338809	11069	11070	0.000220375	3926	3927	0.000100031	2781	12011	12012	0.000422826	16110	16111	0.000382536	20638	20639	0.000481023	17607	17608	0.000493488	10740	10741	0.000233427	11141	11142	0.000259764	15879	15880	0.000417372
FNYWQTEL	TTCAATTACTGGCAGACAGAACTT	Pool 13	2521	2522	6.19806e-05	588	589	1.18219e-05	343	344	7.62714e-06	67	68	1.3537e-06	1356	1357	3.45662e-05	1654.5	1721	1722	6.06149e-05	2322	2323	5.51569e-05	800	801	1.86685e-05	5133	5134	0.000143887	387	388	8.43215e-06	727	728	1.69726e-05	733	734	1.92916e-05
FPSYYLYL	TTTCCATCATATTACTTGTACTTA	Pool 13	6007	6008	0.000147652	1258	1259	2.52695e-05	537	538	1.19285e-05	1321	1322	2.63176e-05	2067	2068	5.26771e-05	2056	4320	4321	0.000152101	7016	7017	0.00016661	1334	1335	3.11142e-05	895	896	2.51116e-05	1337	1338	2.90779e-05	37664	37665	0.000878121	634	635	1.66896e-05
FQFLPAHL	TTTCAATTTCTACCTGCACATCTC	Pool 13	5151	5152	0.000126615	134	135	2.70959e-06	1883	1884	4.17719e-05	6671	6672	0.000132822	278	279	7.10683e-06	708.5	3649	3650	0.000128481	4979	4980	0.000118244	5860	5861	0.0001366	3659	3660	0.000102577	9096	9097	0.000197699	312	313	7.29727e-06	3133	3134	8.23704e-05
FQFYSNLL	TTCCAATTCTACTCAAATCTCCTT	Pool 13	21380	21381	0.000525459	6967	6968	0.000139855	55275	55276	0.00122558	9944	9945	0.000197979	12024	12025	0.000306307	4166	16688	16689	0.000587458	22367	22368	0.000531101	40009	40010	0.000932494	15918	15919	0.000446152	32475	32476	0.00070578	17566	17567	0.000409556	18952	18953	0.000498139
FQFYYLPA	TTCCAGTTTTACTATCTTCCTGCG	Pool 13	3812	3813	9.37081e-05	752	753	1.51135e-05	63	64	1.419e-06	5446	5447	0.000108436	613	614	1.56401e-05	1074	2484	2485	8.74728e-05	3546	3547	8.42193e-05	2598	2599	6.05737e-05	250	251	7.03462e-06	260	261	5.67214e-06	5549	5550	0.000129393	11312	11313	0.000297338
FQICFIPI	TTTCAAATTTGTTTTATACCGATA	Pool 13	11585	11586	0.000284737	2244	2245	4.50595e-05	2901	2902	6.43429e-05	4471	4472	8.9026e-05	3984	3985	0.000101508	2797.5	9189	9190	0.000323491	12301	12302	0.000292096	7644	7645	0.000178178	10957	10958	0.000307113	8957	8958	0.000194678	9052	9053	0.000211061	29953	29954	0.000787276
FQYMQYGF	TTCCAATACATGCAATATGGCTTT	Pool 13	22463	22464	0.000552074	21439	21440	0.000430323	17248	17249	0.000382444	17918	17919	0.000356721	13433	13434	0.000342198	4258	12943	12944	0.000455633	20750	20751	0.000492708	11438	11439	0.000266603	13736	13737	0.000384998	35824	35825	0.000778561	11444	11445	0.000266828	14112	14113	0.00037093
FRYYLFSL	TTCAGGTATTACTTATTTAGCTTA	Pool 13	41631	41632	0.00102315	23968	23969	0.000481083	22441	22442	0.000497582	32122	32123	0.000639486	13785	13786	0.000351164	4282	31272	31273	0.00110082	41089	41090	0.000975633	18148	18149	0.00042299	5859	5860	0.000164235	47789	47790	0.00103859	37827	37828	0.000881921	41428	41429	0.00108887
FSAFCGLL	TTCTCTGCCTTCTGCGGACTACTG	Pool 13	3829	3830	9.41259e-05	2881	2882	5.78448e-05	128	129	2.86018e-06	1422	1423	2.83283e-05	547	548	1.39589e-05	1006	2713	2714	9.55337e-05	3833	3834	9.10337e-05	873	874	2.03699e-05	12	13	3.64343e-07	4561	4562	9.91429e-05	5533	5534	0.000129019	268	269	7.07009e-06
FSAWWARL	TTCTCGGCCTGGTGGGCACGTTTA	Pool 13	34	35	8.60159e-07	3	4	8.02842e-08	12	13	2.88235e-07	5	6	1.19445e-07	11	12	3.0567e-07	247	14	15	5.28005e-07	27	28	6.64826e-07	548	549	1.27953e-05	NA	1	2.80264e-08	15	16	3.47717e-07	1	2	4.66279e-08	10	11	2.89111e-07
FSAYWSGV	TTCTCTGCGTATTGGTCTGGTGTA	Pool 13	6970	6971	0.000171319	1709	1710	3.43215e-05	3055	3056	6.77574e-05	5758	5759	0.000114647	3535	3536	9.00708e-05	2661.5	3545	3546	0.00012482	8060	8061	0.000191399	21870	21871	0.000509737	2575	2576	7.21959e-05	3647	3648	7.92796e-05	15147	15148	0.00035316	2237	2238	5.8821e-05
FSFDFFGG	TTCAGCTTCGATTTCTTCGGAGGA	Pool 13	6604	6605	0.000162324	216	217	4.35542e-06	3119	3120	6.91764e-05	289	290	5.77315e-06	2435	2436	6.2051e-05	2233	4366	4367	0.00015372	6221	6222	0.000147734	964	965	2.24908e-05	15	16	4.48422e-07	959	960	2.0863e-05	3310	3311	7.71925e-05	1900	1901	4.99637e-05
FSFHLAAV	TTTTCTTTCCACCTTGCGGCCGTA	Pool 13	2417	2418	5.94247e-05	935	936	1.87865e-05	2465	2466	5.4676e-05	23291	23292	0.000463684	6726	6727	0.000171354	3466	1783	1784	6.27974e-05	2600	2601	6.17576e-05	571	572	1.33313e-05	5492	5493	0.000153949	1415	1416	3.0773e-05	6	7	1.63198e-07	766	767	2.01589e-05
FSFISEPM	TTCTCTTTCATTAGCGAACCCATG	Pool 13	6052	6053	0.000148758	2953	2954	5.92899e-05	1656	1657	3.67389e-05	741	742	1.47713e-05	6544	6545	0.000166718	3429	4246	4247	0.000149496	6292	6293	0.00014942	1135	1136	2.64762e-05	8364	8365	0.000234441	2793	2794	6.07202e-05	1551	1552	3.61833e-05	2124	2125	5.5851e-05
FSFLFNLT	TTTTCTTTCCTGTTCAATCTTACG	Pool 13	14330	14331	0.000352198	26837	26838	0.000538667	15804	15805	0.000350427	17482	17483	0.000348042	12457	12458	0.000317337	4192	13884	13885	0.000488756	15541	15542	0.000369026	148179	148180	0.00345356	55804	55805	0.00156401	11505	11506	0.000250052	25176	25177	0.000586976	8141	8142	0.000213995
FSFLPLNL	TTTTCCTTCCTACCTTTAAATTTA	Pool 13	17180	17181	0.00042224	1782	1783	3.57867e-05	17308	17309	0.000383774	8004	8005	0.000159359	37954	37955	0.000966809	4858	14150	14151	0.00049812	18015	18016	0.000427768	5501	5502	0.000128233	119298	119299	0.00334352	141429	141430	0.00307361	18486	18487	0.000431005	75009	75010	0.00197148
FSFLSQSI	TTTTCCTTCTTGTCTCAAAGTATA	Pool 13	9835	9836	0.000241729	893	894	1.79435e-05	808	809	1.79371e-05	37862	37863	0.000753755	1813	1814	4.62071e-05	1926.5	6922	6923	0.000243692	8479	8480	0.000201347	6691	6692	0.000155967	3501	3502	9.81483e-05	508	509	1.10618e-05	1682	1683	3.92374e-05	2427	2428	6.38148e-05
FSFMVSTL	TTTAGTTTCATGGTATCGACTCTA	Pool 13	7873	7874	0.000193511	2744	2745	5.50951e-05	3161	3162	7.01076e-05	1060	1061	2.11218e-05	2910	2911	7.41505e-05	2432	6523	6524	0.000229647	8288	8289	0.000196812	20053	20054	0.000467389	2419	2420	6.78238e-05	2731	2732	5.93728e-05	3913	3914	9.12509e-05	22635	22636	0.000594939
FSFPKASF	TTTTCTTTTCCGAAAGCTAGCTTC	Pool 13	4193	4194	0.000103072	1009	1010	2.02718e-05	7275	7276	0.000161323	626	627	1.2482e-05	2421	2422	6.16944e-05	2227	3411	3412	0.000120103	3977	3978	9.44528e-05	23663	23664	0.000551526	5378	5379	0.000150754	4919	4920	0.000106923	6987	6988	0.000162918	24236	24237	0.000637017
FSFTWSSS	TTTTCATTCACCTGGTCGTCGTCA	Pool 13	14059	14060	0.000345538	21668	21669	0.00043492	6367	6368	0.000141191	2249	2250	4.47917e-05	18835	18836	0.0004798	4517	10578	10579	0.000372384	14685	14686	0.000348701	57821	57822	0.00134763	14636	14637	0.000410222	24184	24185	0.000525597	15854	15855	0.000369643	9466	9467	0.00024882
FSFVFGAL	TTCTCGTTTGTATTCGGTGCCTTG	Pool 13	9326	9327	0.00022922	532	533	1.06979e-05	10029	10030	0.000222384	1660	1661	3.30662e-05	22371	22372	0.000569871	4626	6551	6552	0.000230632	9033	9034	0.000214502	2249	2250	5.24397e-05	108	109	3.05487e-06	174	175	3.80316e-06	1481	1482	3.45513e-05	5590	5591	0.000146947
FSFVQSTL	TTCAGCTTCGTCCAATCAACGTTG	Pool 13	4013	4014	9.86479e-05	511	512	1.02764e-05	20188	20189	0.000447629	360	361	7.18658e-06	2089	2090	5.32375e-05	2068	2682	2683	9.44424e-05	3865	3866	9.17935e-05	6029	6030	0.000140538	13	14	3.92369e-07	11545	11546	0.000250922	488	489	1.14005e-05	450	451	1.18536e-05
FSGRYFHI	TTCAGTGGGAGGTACTTTCACATA	Pool 13	4991	4992	0.000122683	598	599	1.20226e-05	17488	17489	0.000387765	49678	49679	0.000988981	16873	16874	0.000429823	4436	3528	3529	0.000124222	5034	5035	0.00011955	1593	1594	3.71506e-05	1124	1125	3.15297e-05	933	934	2.0298e-05	433	434	1.01183e-05	155461	155462	0.00408598
FSGVYKKL	TTTTCAGGAGTCTATAAGAAGCTA	Pool 13	3827	3828	9.40768e-05	1835	1836	3.68505e-05	100	101	2.23936e-06	514	515	1.02523e-05	1760	1761	4.48571e-05	1890.5	2951	2952	0.000103911	3722	3723	8.83982e-05	1054	1055	2.45884e-05	590	591	1.65636e-05	2118	2119	4.60508e-05	8419	8420	0.000196304	6282	6283	0.000165135
FSIMGVNL	TTCTCTATCATGGGAGTAAACCTG	Pool 13	7523	7524	0.00018491	666	667	1.33874e-05	1759	1760	3.90226e-05	1997	1998	3.9775e-05	4402	4403	0.000112155	2914	5287	5288	0.000186139	7157	7158	0.000169958	14786	14787	0.000344634	356	357	1.00054e-05	5224	5225	0.000113551	9857	9858	0.000229829	4703	4704	0.000123635
FSIPHAFL	TTTTCGATTCCTCACGCGTTTCTG	Pool 13	NA	1	2.4576e-08	NA	1	2.00711e-08	NA	1	2.21719e-08	NA	1	1.99074e-08	NA	1	2.54725e-08	64	NA	1	3.52003e-08	NA	1	2.37438e-08	NA	1	2.33065e-08	NA	1	2.80264e-08	NA	1	2.17323e-08	NA	1	2.3314e-08	NA	1	2.62828e-08
FSIRYHDM	TTTTCAATTCGGTATCACGACATG	Pool 13	4486	4487	0.000110272	1250	1251	2.51089e-05	4003	4004	8.87764e-05	18440	18441	0.000367113	2165	2166	5.51735e-05	2104	3396	3397	0.000119575	5112	5113	0.000121402	6236	6237	0.000145363	46	47	1.31724e-06	9977	9978	0.000216845	13173	13174	0.000307138	2071	2072	5.44581e-05
FSLFMAAL	TTTTCATTATTCATGGCCGCCCTG	Pool 13	3872	3873	9.51827e-05	7	8	1.60568e-07	1549	1550	3.43665e-05	26852	26853	0.000534574	1295	1296	3.30124e-05	1603	3145	3146	0.00011074	3862	3863	9.17223e-05	10	11	2.56372e-07	16	17	4.76448e-07	544	545	1.18441e-05	25	26	6.06163e-07	448	449	1.1801e-05
FSLIFKLI	TTCAGTCTCATTTTCAAGCTTATA	Pool 13	9223	9224	0.000226689	12243	12244	0.00024575	1268	1269	2.81362e-05	5402	5403	0.00010756	9765	9766	0.000248765	3928	7195	7196	0.000253301	10248	10249	0.00024335	4115	4116	9.59297e-05	450	451	1.26399e-05	613	614	1.33437e-05	5415	5416	0.000126268	3688	3689	9.69574e-05
FSLLFPAV	TTCTCCCTTTTGTTCCCAGCGGTG	Pool 13	6333	6334	0.000155664	126	127	2.54902e-06	2593	2594	5.7514e-05	145	146	2.90648e-06	3571	3572	9.09878e-05	2668	4277	4278	0.000150587	5792	5793	0.000137548	25345	25346	0.000590727	224	225	6.30593e-06	1481	1482	3.22073e-05	125	126	2.93756e-06	6463	6464	0.000169892
FSLNMYEM	TTTTCGTTGAATATGTATGAAATG	Pool 13	1838	1839	4.51952e-05	39	40	8.02842e-07	577	578	1.28154e-05	139	140	2.78704e-06	697	698	1.77798e-05	1135.5	1425	1426	5.01956e-05	1700	1701	4.03882e-05	6	7	1.63146e-07	2	3	8.40791e-08	183	184	3.99875e-06	NA	1	2.3314e-08	1674	1675	4.40238e-05
FSLVMCLL	TTTTCCCTAGTGATGTGTCTGCTC	Pool 13	7683	7684	0.000188842	1147	1148	2.30416e-05	35486	35487	0.000786815	1742	1743	3.46986e-05	3189	3190	8.12573e-05	2541	4663	4664	0.000164174	7519	7520	0.000178553	1053	1054	2.45651e-05	6471	6472	0.000181387	3895	3896	8.46692e-05	10333	10334	0.000240927	183152	183153	0.00481378
FSMCFGFV	TTTTCAATGTGTTTCGGTTTTGTT	Pool 13	8643	8644	0.000212435	6915	6916	0.000138811	4159	4160	9.22352e-05	2966	2967	5.90653e-05	16115	16116	0.000410515	4399	7474	7475	0.000263122	9229	9230	0.000219155	6266	6267	0.000146062	53	54	1.51342e-06	5342	5343	0.000116116	4414	4415	0.000102931	13304	13305	0.000349693
FSMYVAPL	TTTAGTATGTACGTTGCACCATTA	Pool 13	3027	3028	7.4416e-05	1657218	1657219	0.0332621	478	479	1.06204e-05	107233	107234	0.00213475	24565	24566	0.000625758	4684	3027	3028	0.000106587	2617	2618	6.21613e-05	1038	1039	2.42155e-05	3839	3840	0.000107621	481	482	1.0475e-05	1195	1196	2.78835e-05	39295	39296	0.00103281
FSPHFHNF	TTCTCACCACATTTTCACAATTTT	Pool 13	8437	8438	0.000207372	1406	1407	2.824e-05	4610	4611	0.000102235	3227	3228	6.42612e-05	4255	4256	0.000108411	2866	6956	6957	0.000244889	9653	9654	0.000229223	1925	1926	4.48884e-05	384	385	1.07902e-05	938	939	2.04067e-05	8	9	2.09826e-07	5567	5568	0.000146343
FSPKFQAL	TTCTCACCCAAGTTCCAAGCATTA	Pool 13	3145	3146	7.7316e-05	471	472	9.47354e-06	821	822	1.82253e-05	11696	11697	0.000232857	933	934	2.37913e-05	1327	1943	1944	6.84294e-05	3193	3194	7.58377e-05	2364	2365	5.51199e-05	15	16	4.48422e-07	2800	2801	6.08723e-05	677	678	1.58069e-05	1930	1931	5.07522e-05
FSPPFLEL	TTCTCTCCGCCATTCCTAGAACTA	Pool 13	5935	5936	0.000145883	623	624	1.25243e-05	21492	21493	0.000476541	1767	1768	3.51963e-05	4877	4878	0.000124255	3040.5	4449	4450	0.000156641	7379	7380	0.000175229	1692	1693	3.94579e-05	306	307	8.60409e-06	3871	3872	8.41476e-05	123	124	2.89093e-06	3627	3628	9.53542e-05
FSPPHSSL	TTCTCACCGCCCCATTCCAGTTTG	Pool 13	5115	5116	0.000125731	602	603	1.21028e-05	6751	6752	0.000149705	9638	9639	0.000191888	20299	20300	0.000517092	4567	3377	3378	0.000118907	6046	6047	0.000143579	102287	102288	0.00238398	260	261	7.31488e-06	49	50	1.08662e-06	7104	7105	0.000165646	1685	1686	4.43129e-05
FSPSFPSL	TTTTCTCCGAGTTTCCCTTCCTTG	Pool 13	8379	8380	0.000205947	7707	7708	0.000154708	6636	6637	0.000147155	7431	7432	0.000147952	4218	4219	0.000107469	2857	6210	6211	0.000218629	8206	8207	0.000194865	8402	8403	0.000195845	13780	13781	0.000386231	15199	15200	0.000330332	7180	7181	0.000167418	10072	10073	0.000264747
FSSLFPYV	TTCTCTTCCCTATTCCCCTATGTA	Pool 13	5830	5831	0.000143302	2364	2365	4.74681e-05	8118	8119	0.000180014	764	765	1.52292e-05	5212	5213	0.000132788	3120.5	4810	4811	0.000169349	6211	6212	0.000147497	1982	1983	4.62168e-05	4454	4455	0.000124857	80	81	1.76032e-06	11380	11381	0.000265336	9547	9548	0.000250949
FSSPYEHL	TTCAGTAGCCCCTACGAGCATCTG	Pool 13	1336	1337	3.28581e-05	1	2	4.01421e-08	1004	1005	2.22828e-05	29	30	5.97223e-07	5	6	1.52835e-07	206	911	912	3.21027e-05	1696	1697	4.02932e-05	868	869	2.02534e-05	2	3	8.40791e-08	NA	1	2.17323e-08	1	2	4.66279e-08	863	864	2.27084e-05
FSVFYQYL	TTCTCCGTGTTCTATCAATATTTA	Pool 13	9208	9209	0.00022632	6739	6740	0.000135279	1057	1058	2.34579e-05	3663	3664	7.29408e-05	8206	8207	0.000209053	3718	6946	6947	0.000244537	9147	9148	0.000217208	1711	1712	3.99008e-05	776	777	2.17765e-05	353	354	7.69325e-06	5947	5948	0.000138671	6202	6203	0.000163032
FSVFYTLM	TTTTCCGTGTTTTATACACTTATG	Pool 13	4361	4362	0.0001072	140	141	2.83002e-06	1051	1052	2.33249e-05	1862	1863	3.70875e-05	919	920	2.34347e-05	1313	3343	3344	0.00011771	4607	4608	0.000109411	1059	1060	2.47049e-05	1177	1178	3.30151e-05	7777	7778	0.000169034	2089	2090	4.87262e-05	465	466	1.22478e-05
FSVVLAGL	TTTTCGGTGGTGCTAGCTGGACTT	Pool 13	3469	3470	8.52786e-05	179	180	3.61279e-06	5139	5140	0.000113964	1240	1241	2.47051e-05	363	364	9.27199e-06	805.5	2625	2626	9.2436e-05	3628	3629	8.61663e-05	3	4	9.32261e-08	752	753	2.11039e-05	159	160	3.47717e-06	64	65	1.51541e-06	14673	14674	0.000385674
FSVVYTFV	TTTTCAGTGGTGTACACATTCGTA	Pool 13	3086	3087	7.5866e-05	245	246	4.93748e-06	3966	3967	8.7956e-05	3016	3017	6.00607e-05	2585	2586	6.58719e-05	2306	1963	1964	6.91334e-05	3211	3212	7.62651e-05	4015	4016	9.3599e-05	12	13	3.64343e-07	1143	1144	2.48618e-05	5	6	1.39884e-07	130	131	3.44305e-06
FSYCVGNV	TTTTCCTACTGCGTAGGCAACGTT	Pool 13	5754	5755	0.000141435	395	396	7.94814e-06	384	385	8.53619e-06	1809	1810	3.60324e-05	1946	1947	4.9595e-05	2000	4483	4484	0.000157838	4634	4635	0.000110053	1866	1867	4.35133e-05	801	802	2.24771e-05	1910	1911	4.15305e-05	147	148	3.45047e-06	2587	2588	6.802e-05
FSYISFAL	TTTTCCTACATAAGTTTTGCCCTC	Pool 13	3297	3298	8.10515e-05	8433	8434	0.000169279	148	149	3.30362e-06	819	820	1.63241e-05	132598	132599	0.00337763	4995	2261	2262	7.96231e-05	3317	3318	7.87819e-05	872	873	2.03466e-05	2775	2776	7.78012e-05	1182	1183	2.57094e-05	21115	21116	0.000492298	1267	1268	3.33266e-05
FSYKKMTI	TTCTCATATAAGAAGATGACGATA	Pool 13	1586	1587	3.90021e-05	382	383	7.68722e-06	70	71	1.57421e-06	5456	5457	0.000108635	553	554	1.41118e-05	1010.5	1214	1215	4.27684e-05	1796	1797	4.26676e-05	2	3	6.99196e-08	8	9	2.52237e-07	707	708	1.53865e-05	4317	4318	0.00010067	2180	2181	5.73229e-05
FSYNNKQL	TTCTCATACAACAACAAACAACTG	Pool 13	3765	3766	9.25531e-05	665	666	1.33673e-05	1015	1016	2.25267e-05	1871	1872	3.72667e-05	3506	3507	8.93321e-05	2653	3005	3006	0.000105812	4567	4568	0.000108462	1346	1347	3.13939e-05	592	593	1.66196e-05	17334	17335	0.00037673	534	535	1.2473e-05	1649	1650	4.33667e-05
FSYRIPNL	TTCAGCTATCGCATACCCAATCTT	Pool 13	3032	3033	7.45389e-05	3828	3829	7.68521e-05	3945	3946	8.74904e-05	146	147	2.92639e-06	4606	4607	0.000117352	2978	2246	2247	7.90951e-05	3309	3310	7.8592e-05	997	998	2.32599e-05	802	803	2.25052e-05	146	147	3.19465e-06	13889	13890	0.000323831	671	672	1.76621e-05
FSYSLGAI	TTTAGTTATAGTTTAGGGGCCATT	Pool 13	7934	7935	0.00019501	2774	2775	5.56972e-05	2249	2250	4.98868e-05	4517	4518	8.99417e-05	4231	4232	0.0001078	2861	7251	7252	0.000255273	7988	7989	0.000189689	18711	18712	0.000436112	8183	8184	0.000229368	541	542	1.17789e-05	26767	26768	0.000624068	3231	3232	8.49462e-05
FSYVGFPV	TTTAGTTATGTGGGATTCCCTGTT	Pool 13	14061	14062	0.000345587	1283	1284	2.57712e-05	11416	11417	0.000253137	4353	4354	8.66769e-05	6868	6869	0.000174971	3493.5	11097	11098	0.000390653	14717	14718	0.000349461	22193	22194	0.000517265	41963	41964	0.0011761	20275	20276	0.000440645	10001	10002	0.000233186	7378	7379	0.000193941
FTATWAAM	TTTACAGCAACTTGGGCCGCTATG	Pool 13	1414	1415	3.4775e-05	1871	1872	3.7573e-05	1	2	4.43439e-08	6	7	1.39352e-07	73	74	1.88497e-06	425	599	600	2.11202e-05	904	905	2.14881e-05	2	3	6.99196e-08	13	14	3.92369e-07	2	3	6.5197e-08	13221	13222	0.000308257	463	464	1.21952e-05
FTFFLSLF	TTTACATTCTTCCTCTCACTTTTC	Pool 13	24851	24852	0.000610762	8131	8132	0.000163218	8987	8988	0.000199281	13572	13573	0.000270203	14470	14471	0.000368613	4325.5	21276	21277	0.000748957	27538	27539	0.000653881	42324	42325	0.000986449	6178	6179	0.000173175	23050	23051	0.000500952	20908	20909	0.000487472	20479	20480	0.000538273
FTFMESGV	TTTACTTTTATGGAGAGTGGCGTT	Pool 13	1659	1660	4.07961e-05	28	29	5.82061e-07	1953	1954	4.33239e-05	78	79	1.57269e-06	290	291	7.4125e-06	721	1550	1551	5.45957e-05	1986	1987	4.71789e-05	2	3	6.99196e-08	25	26	7.28686e-07	314	315	6.84569e-06	426	427	9.95506e-06	6	7	1.8398e-07
FTFSLLHL	TTCACCTTCAGCTTGCTACACCTG	Pool 13	1531	1532	3.76504e-05	1105	1106	2.21986e-05	129	130	2.88235e-06	216	217	4.31991e-06	2694	2695	6.86484e-05	2351	1028	1029	3.62211e-05	1457	1458	3.46185e-05	9655	9656	0.000225048	10	11	3.0829e-07	30	31	6.73703e-07	17	18	4.19651e-07	643	644	1.69262e-05
FTFSLLLL	TTTACGTTCAGCCTACTTCTCTTA	Pool 13	10051	10052	0.000247038	6938	6939	0.000139273	7314	7315	0.000162188	40568	40569	0.000807624	2365	2366	6.0268e-05	2200.5	7347	7348	0.000258652	10411	10412	0.00024722	4468	4469	0.000104157	19356	19357	0.000542506	8392	8393	0.0001824	6527	6528	0.000152194	29273	29274	0.000769404
FTFSYKKA	TTCACGTTCTCTTACAAGAAGGCT	Pool 13	2002	2003	4.92257e-05	466	467	9.37318e-06	708	709	1.57199e-05	5270	5271	0.000104932	1023	1024	2.60838e-05	1390.5	1458	1459	5.13573e-05	2075	2076	4.92921e-05	1091	1092	2.54507e-05	14	15	4.20396e-07	411	412	8.95372e-06	17431	17432	0.000406409	1623	1624	4.26833e-05
FTFTDYYM	TTCACGTTTACAGACTATTATATG	Pool 13	5437	5438	0.000133644	1568	1569	3.14915e-05	1027	1028	2.27927e-05	928	929	1.8494e-05	10518	10519	0.000267945	4010	3935	3936	0.000138548	6028	6029	0.000143151	4007	4008	9.34126e-05	80	81	2.27014e-06	6717	6718	0.000145998	2881	2882	6.71908e-05	65653	65654	0.00172557
FTFVCMAL	TTTACCTTTGTCTGTATGGCGTTA	Pool 13	1801	1802	4.42859e-05	10722	10723	0.000215222	1428	1429	3.16837e-05	213	214	4.26019e-06	412	413	1.05201e-05	865	1106	1107	3.89667e-05	1909	1910	4.53507e-05	16	17	3.96211e-07	37	38	1.065e-06	500	501	1.08879e-05	7	8	1.86512e-07	2052	2053	5.39587e-05
FTFVIPAL	TTCACATTTGTTATTCCCGCGCTC	Pool 13	8420	8421	0.000206954	146	147	2.95045e-06	13411	13412	0.00029737	6344	6345	0.000126313	5282	5283	0.000134571	3137.5	5726	5727	0.000201592	8966	8967	0.000212911	17333	17334	0.000403995	3653	3654	0.000102408	3086	3087	6.70877e-05	1369	1370	3.19401e-05	25300	25301	0.000664982
FTIVYAGA	TTCACGATTGTATATGCGGGTGCA	Pool 13	3430	3431	8.43201e-05	15333	15334	0.00030777	15498	15499	0.000343643	63013	63014	0.00125445	96	97	2.47083e-06	471	2813	2814	9.90537e-05	4122	4123	9.78957e-05	31172	31173	0.000726534	76	77	2.15803e-06	191	192	4.17261e-06	506	507	1.18202e-05	47113	47114	0.00123829
FTKDFAPV	TTCACAAAGGATTTTGCTCCGGTC	Pool 13	3360	3361	8.25998e-05	1185	1186	2.38043e-05	6856	6857	0.000152033	2248	2249	4.47718e-05	1632	1633	4.15966e-05	1824	1783	1784	6.27974e-05	3669	3670	8.71398e-05	3701	3702	8.62808e-05	393	394	1.10424e-05	4462	4463	9.69914e-05	1233	1234	2.87694e-05	7586	7587	0.000199408
FTLLLLPL	TTTACCCTGTTGTTACTGCCATTG	Pool 13	14270	14271	0.000350724	2775	2776	5.57173e-05	78670	78671	0.00174429	7589	7590	0.000151097	5340	5341	0.000136049	3154	9127	9128	0.000321308	14097	14098	0.00033474	6583	6584	0.00015345	1277	1278	3.58177e-05	2736	2737	5.94814e-05	5269	5270	0.000122865	9174	9175	0.000241145
FTLVFARL	TTCACACTGGTATTTGCCCGTCTT	Pool 13	6744	6745	0.000165765	357	358	7.18544e-06	2020	2021	4.48095e-05	882	883	1.75783e-05	2661	2662	6.78078e-05	2336	4507	4508	0.000158683	6732	6733	0.000159867	2499	2500	5.82663e-05	40	41	1.14908e-06	2253	2254	4.89847e-05	1108	1109	2.58552e-05	728	729	1.91602e-05
FTMRYSLI	TTCACCATGAGGTACTCGCTGATT	Pool 13	4992	4993	0.000122708	9736	9737	0.000195432	405	406	9.0018e-06	442	443	8.81899e-06	1674	1675	4.26665e-05	1849	3790	3791	0.000133444	5600	5601	0.000132989	4687	4688	0.000109261	437	438	1.22755e-05	4658	4659	0.000101251	237	238	5.54872e-06	5174	5175	0.000136014
FTTSYREL	TTCACAACATCTTATAGGGAGCTA	Pool 13	10853	10854	0.000266748	4264	4265	8.56031e-05	31678	31679	0.000702385	1418	1419	2.82486e-05	8357	8358	0.000212899	3742	6001	6002	0.000211272	10806	10807	0.000256599	2387	2388	5.5656e-05	1716	1717	4.81213e-05	1446	1447	3.14467e-05	224	225	5.24564e-06	25283	25284	0.000664535
FTVLFAIV	TTCACAGTCCTCTTCGCAATTGTG	Pool 13	1016	1017	2.49938e-05	19	20	4.01421e-07	1	2	4.43439e-08	99	100	1.99074e-06	31	32	8.1512e-07	311.5	686	687	2.41826e-05	1384	1385	3.28852e-05	NA	1	2.33065e-08	431	432	1.21074e-05	33	34	7.389e-07	NA	1	2.3314e-08	60	61	1.60325e-06
FTYAKYIV	TTTACATATGCAAAGTATATCGTC	Pool 13	4409	4410	0.00010838	1125	1126	2.26e-05	1186	1187	2.63181e-05	2580	2581	5.13811e-05	1289	1290	3.28595e-05	1595	2665	2666	9.3844e-05	3861	3862	9.16986e-05	3	4	9.32261e-08	464	465	1.30323e-05	592	593	1.28873e-05	1219	1220	2.8443e-05	629	630	1.65582e-05
FTYLKKSM	TTTACATATCTCAAGAAAAGCATG	Pool 13	9174	9175	0.000225484	502	503	1.00957e-05	624	625	1.38575e-05	4068	4069	8.10033e-05	5660	5661	0.0001442	3242	5409	5410	0.000190434	8847	8848	0.000210085	16744	16745	0.000390268	78963	78964	0.00221307	7187	7188	0.000156212	28400	28401	0.00066214	2576	2577	6.77309e-05
FTYRGVDL	TTTACGTACAGAGGAGTCGACCTC	Pool 13	4100	4101	0.000100786	105	106	2.12753e-06	964	965	2.13959e-05	862	863	1.71801e-05	861	862	2.19573e-05	1267	2685	2686	9.4548e-05	4736	4737	0.000112474	8	9	2.09759e-07	11	12	3.36316e-07	2059	2060	4.47686e-05	11205	11206	0.000261256	3417	3418	8.98348e-05
FTYVNEKL	TTCACGTATGTGAATGAAAAGTTG	Pool 13	4016	4017	9.87216e-05	68	69	1.3849e-06	6974	6975	0.000154649	10052	10053	0.000200129	2656	2657	6.76805e-05	2335	2564	2565	9.02888e-05	4243	4244	0.000100769	2635	2636	6.1436e-05	260	261	7.31488e-06	12748	12749	0.000277066	97	98	2.28477e-06	4307	4308	0.000113227
FTYWLTFV	TTTACCTATTGGTTAACCTTCGTT	Pool 13	6825	6826	0.000167756	28	29	5.82061e-07	2410	2411	5.34565e-05	3662	3663	7.29209e-05	2410	2411	6.14142e-05	2221	4540	4541	0.000159845	6671	6672	0.000158419	9546	9547	0.000222507	1921	1922	5.38667e-05	1660	1661	3.60974e-05	1473	1474	3.43648e-05	6680	6681	0.000175596
FVAEHSNL	TTTGTTGCCGAGCACAGCAATTTA	Pool 13	5466	5467	0.000134357	4026	4027	8.08261e-05	343	344	7.62714e-06	7686	7687	0.000153028	11565	11566	0.000294615	4126	3436	3437	0.000120983	6092	6093	0.000144671	3965	3966	9.24337e-05	39917	39918	0.00111876	10843	10844	0.000235666	878	879	2.0493e-05	12084	12085	0.000317628
FVAFHPPL	TTCGTCGCTTTTCATCCACCTCTG	Pool 13	4555	4556	0.000111968	86	87	1.74618e-06	1806	1807	4.00647e-05	1578	1579	3.14338e-05	7228	7229	0.000184141	3578	3668	3669	0.00012915	5546	5547	0.000131707	4571	4572	0.000106557	7	8	2.24211e-07	1155	1156	2.51226e-05	3883	3884	9.05514e-05	8175	8176	0.000214889
FVALFTLL	TTCGTGGCCTTGTTTACCTTGCTG	Pool 13	2208	2209	5.42883e-05	1082	1083	2.1737e-05	15000	15001	0.000332601	2314	2315	4.60857e-05	258	259	6.59738e-06	676.5	1095	1096	3.85795e-05	2268	2269	5.38747e-05	646	647	1.50793e-05	308	309	8.66015e-06	1689	1690	3.67277e-05	149	150	3.49709e-06	279	280	7.3592e-06
FVASYQEL	TTCGTGGCATCCTACCAGGAACTC	Pool 13	8244	8245	0.000202629	3152	3153	6.3284e-05	7303	7304	0.000161944	10923	10924	0.000217469	5979	5980	0.000152326	3302	5115	5116	0.000180085	8727	8728	0.000207236	1350	1351	3.14871e-05	247	248	6.95054e-06	5254	5255	0.000114203	463	464	1.08177e-05	3330	3331	8.75482e-05
FVAYFLPV	TTCGTTGCTTACTTCCTGCCTGTA	Pool 13	6858	6859	0.000168567	3379	3380	6.78402e-05	9712	9713	0.000215356	1138	1139	2.26746e-05	11333	11334	0.000288705	4099	5581	5582	0.000196488	7111	7112	0.000168866	1728	1729	4.0297e-05	359	360	1.00895e-05	21730	21731	0.000472266	1582	1583	3.6906e-05	4682	4683	0.000123083
FVDMFSVL	TTTGTCGACATGTTTTCAGTACTC	Pool 13	18743	18744	0.000460652	6568	6569	0.000131847	22880	22881	0.000507316	43146	43147	0.000858946	8119	8120	0.000206837	3705	14742	14743	0.000518958	20809	20810	0.000494109	6985	6986	0.000162819	13974	13975	0.000391668	17234	17235	0.000374557	22250	22251	0.000518759	69201	69202	0.00181883
FVFLRTMV	TTTGTTTTCCTCCGGACCATGGTA	Pool 13	4878	4879	0.000119906	883	884	1.77428e-05	1800	1801	3.99316e-05	393	394	7.84353e-06	4771	4772	0.000121555	3018	3434	3435	0.000120913	5299	5300	0.000125842	3892	3893	9.07323e-05	5809	5810	0.000162833	66711	66712	0.00144981	4792	4793	0.000111744	5593	5594	0.000147026
FVFSHLAL	TTTGTATTCTCGCATCTAGCACTG	Pool 13	5618	5619	0.000138092	9330	9331	0.000187283	3104	3105	6.88438e-05	5465	5466	0.000108814	2310	2311	5.8867e-05	2172	4627	4628	0.000162907	6321	6322	0.000150108	2164	2165	5.04586e-05	4363	4364	0.000122307	6654	6655	0.000144629	19392	19393	0.000452128	678	679	1.78461e-05
FVFSRRRV	TTTGTATTCAGCCGCAGGCGGGTC	Pool 13	4819	4820	0.000118456	189	190	3.8135e-06	711	712	1.57864e-05	810	811	1.61449e-05	2345	2346	5.97585e-05	2186	3196	3197	0.000112535	4866	4867	0.000115561	2419	2420	5.64018e-05	78	79	2.21408e-06	332	333	7.23687e-06	588	589	1.37319e-05	1213	1214	3.19074e-05
FVFTYLRS	TTCGTCTTCACCTACCTGAGAAGT	Pool 13	2594	2595	6.37746e-05	9160	9161	0.000183871	1136	1137	2.52095e-05	1270	1271	2.53023e-05	1615	1616	4.11636e-05	1818	1941	1942	6.8359e-05	2681	2682	6.36809e-05	7981	7982	0.000186033	94	95	2.6625e-06	243	244	5.30269e-06	11	12	2.79768e-07	12701	12702	0.000333845
FVFVSINL	TTCGTGTTCGTAAGTATCAATCTA	Pool 13	49179	49180	0.00120865	70735	70736	0.00141975	19691	19692	0.00043661	50590	50591	0.00100714	42040	42041	0.00107089	4882	39130	39131	0.00137742	53707	53708	0.00127523	147065	147066	0.0034276	21138	21139	0.000592449	23325	23326	0.000506929	15775	15776	0.000367801	36857	36858	0.000968733
FVFWPFSL	TTTGTATTCTGGCCCTTTTCGCTT	Pool 13	13866	13867	0.000340795	5733	5734	0.000115087	7118	7119	0.000157842	5009	5010	9.97362e-05	6701	6702	0.000170717	3461.5	11363	11364	0.000400016	15189	15190	0.000360668	7572	7573	0.0001765	6588	6589	0.000184666	14639	14640	0.000318161	837	838	1.95371e-05	12425	12426	0.000326591
FVGWYNGL	TTCGTCGGATGGTATAACGGCTTG	Pool 13	3050	3051	7.49813e-05	1561	1562	3.1351e-05	48	49	1.08642e-06	134	135	2.6875e-06	86	87	2.21611e-06	451	1633	1634	5.75173e-05	2363	2364	5.61304e-05	5	6	1.39839e-07	14	15	4.20396e-07	4	5	1.08662e-07	52	53	1.23564e-06	253	254	6.67584e-06
FVHNFSRI	TTTGTCCATAACTTCAGTAGAATA	Pool 13	3939	3940	9.68293e-05	202	203	4.07442e-06	6952	6953	0.000154161	1476	1477	2.94033e-05	5609	5610	0.000142901	3228	2386	2387	8.40231e-05	3397	3398	8.06814e-05	257	258	6.01308e-06	204	205	5.74541e-06	2945	2946	6.40235e-05	247	248	5.78186e-06	1892	1893	4.97534e-05
FVHSWTNL	TTTGTCCACTCTTGGACGAACCTA	Pool 13	4085	4086	0.000100417	1895	1896	3.80547e-05	3889	3890	8.62488e-05	115	116	2.30926e-06	1308	1309	3.33435e-05	1612.5	2298	2299	8.09255e-05	3760	3761	8.93004e-05	1946	1947	4.53778e-05	13	14	3.92369e-07	1339	1340	2.91213e-05	7	8	1.86512e-07	4410	4411	0.000115934
FVIHFFEV	TTTGTAATACACTTCTTTGAGGTG	Pool 13	4790	4791	0.000117743	5056	5057	0.000101499	850	851	1.88683e-05	3432	3433	6.83422e-05	1019	1020	2.5982e-05	1389	3069	3070	0.000108065	4843	4844	0.000115015	1050	1051	2.44952e-05	26	27	7.56712e-07	396	397	8.62774e-06	1598	1599	3.7279e-05	1563	1564	4.11064e-05
FVIIFQNL	TTTGTAATTATCTTCCAAAACTTA	Pool 13	4469	4470	0.000109855	2008	2009	4.03228e-05	2892	2893	6.41434e-05	26919	26920	0.000535908	4652	4653	0.000118524	2989.5	3402	3403	0.000119787	4478	4479	0.000106348	5986	5987	0.000139536	2706	2707	7.58674e-05	1725	1726	3.751e-05	843	844	1.9677e-05	6818	6819	0.000179223
FVKSYENL	TTTGTAAAGAGCTACGAGAATCTG	Pool 13	3519	3520	8.65074e-05	99	100	2.00711e-06	1354	1355	3.0043e-05	10311	10312	0.000205285	4975	4976	0.000126751	3064	1995	1996	7.02598e-05	3255	3256	7.73098e-05	711	712	1.65942e-05	17	18	5.04475e-07	1800	1801	3.91399e-05	32801	32802	0.000764745	1478	1479	3.88723e-05
FVLCHGLL	TTCGTCCTCTGCCACGGGTTGTTG	Pool 13	6602	6603	0.000162275	305	306	6.14174e-06	7339	7340	0.000162742	8123	8124	0.000161728	456	457	1.16409e-05	915.5	4740	4741	0.000166885	7046	7047	0.000167323	1710	1711	3.98775e-05	25	26	7.28686e-07	20442	20443	0.000444274	79	80	1.86512e-06	176	177	4.65206e-06
FVMKYNLM	TTTGTCATGAAGTATAACCTTATG	Pool 13	2400	2401	5.90069e-05	64	65	1.30462e-06	905	906	2.00878e-05	987	988	1.96685e-05	441	442	1.12588e-05	895.5	1771	1772	6.2375e-05	2595	2596	6.16389e-05	253	254	5.91986e-06	9	10	2.80264e-07	104	105	2.2819e-06	6857	6858	0.000159887	105	106	2.78598e-06
FVPKFAGL	TTTGTGCCAAAATTCGCGGGCTTA	Pool 13	2304	2305	5.66476e-05	18	19	3.8135e-07	89	90	1.99547e-06	4925	4926	9.8064e-05	10	11	2.80198e-07	239.5	1288	1289	4.53732e-05	2333	2334	5.5418e-05	2789	2790	6.50252e-05	7	8	2.24211e-07	1240	1241	2.69698e-05	10274	10275	0.000239551	4106	4107	0.000107944
FVQCYHEL	TTTGTCCAGTGCTACCACGAGCTG	Pool 13	2128	2129	5.23222e-05	326	327	6.56324e-06	793	794	1.76045e-05	716	717	1.42736e-05	54	55	1.40099e-06	375.5	1911	1912	6.7303e-05	2120	2121	5.03606e-05	2159	2160	5.03421e-05	10	11	3.0829e-07	381	382	8.30175e-06	4905	4906	0.000114378	75	76	1.9975e-06
FVRVWVEL	TTCGTTCGGGTGTGGGTAGAACTA	Pool 13	1187	1188	2.91962e-05	NA	1	2.00711e-08	40	41	9.09049e-07	71	72	1.43333e-06	152	153	3.89729e-06	553	969	970	3.41443e-05	1455	1456	3.4571e-05	NA	1	2.33065e-08	2	3	8.40791e-08	2	3	6.5197e-08	32	33	7.69361e-07	5	6	1.57697e-07
FVTIFGNI	TTTGTTACGATCTTTGGAAATATA	Pool 13	19906	19907	0.000489234	1624	1625	3.26155e-05	18315	18316	0.000406101	11197	11198	0.000222923	10944	10945	0.000278797	4053	14379	14380	0.000506181	20300	20301	0.000482023	8037	8038	0.000187338	26779	26780	0.000750546	18541	18542	0.000402961	20569	20570	0.000479568	9294	9295	0.000244299
FVVPRFKL	TTCGTAGTCCCTCGATTTAAGCTT	Pool 13	3413	3414	8.39023e-05	387	388	7.78757e-06	1275	1276	2.82914e-05	1462	1463	2.91246e-05	325	326	8.30404e-06	769	2453	2454	8.63816e-05	3516	3517	8.3507e-05	87	88	2.05097e-06	54	55	1.54145e-06	17121	17122	0.000372101	1033	1034	2.41066e-05	8274	8275	0.000217491
FVVVFAVL	TTTGTGGTAGTGTTCGCCGTTTTA	Pool 13	8186	8187	0.000201203	3177	3178	6.37858e-05	12988	12989	0.000287991	11174	11175	0.000222465	1480	1481	3.77248e-05	1736	5675	5676	0.000199797	8521	8522	0.000202345	8651	8652	0.000201648	180	181	5.07277e-06	1319	1320	2.86867e-05	1962	1963	4.57653e-05	8036	8037	0.000211235
FWFYNYGL	TTTTGGTTTTATAACTACGGACTT	Pool 13	5307	5308	0.000130449	77	78	1.56554e-06	25011	25012	0.000554564	1652	1653	3.2907e-05	2443	2444	6.22548e-05	2239	3988	3989	0.000140414	4890	4891	0.000116131	1235	1236	2.88069e-05	4038	4039	0.000113198	176	177	3.84662e-06	1627	1628	3.79551e-05	1514	1515	3.98185e-05
FWYDMAAL	TTCTGGTATGATATGGCGGCTTTG	Pool 13	2930	2931	7.20321e-05	56733	56734	0.00113871	13289	13290	0.000294665	332	333	6.62917e-06	5552	5553	0.000141449	3214	1850	1851	6.51558e-05	3147	3148	7.47455e-05	563	564	1.31449e-05	3472	3473	9.73356e-05	51	52	1.13008e-06	165	166	3.87012e-06	2056	2057	5.40638e-05
FYFAFVTL	TTTTACTTCGCTTTCGTAACACTG	Pool 13	20258	20259	0.000497884	9300	9301	0.000186681	20224	20225	0.000448427	13022	13023	0.000259254	12821	12822	0.000326609	4216	16155	16156	0.000568696	20173	20174	0.000479007	13720	13721	0.000319789	2440	2441	6.84124e-05	43329	43330	0.000941662	90444	90445	0.00210863	17203	17204	0.00045217
FYFRGYGL	TTCTACTTTCGAGGTTACGGGCTG	Pool 13	7289	7290	0.000179159	341	342	6.8643e-06	761	762	1.6895e-05	8484	8485	0.000168915	7114	7115	0.000181237	3560	4896	4897	0.000172376	6711	6712	0.000159368	4124	4125	9.61394e-05	735	736	2.06274e-05	56126	56127	0.00121977	195	196	4.56954e-06	1813	1814	4.76771e-05
FYKFVPLL	TTCTATAAATTCGTGCCTCTTCTC	Pool 13	3779	3780	9.28971e-05	464	465	9.33304e-06	2072	2073	4.59624e-05	2618	2619	5.21375e-05	1198	1199	3.05415e-05	1523	3732	3733	0.000131403	4644	4645	0.00011029	6298	6299	0.000146808	529	530	1.4854e-05	467	468	1.01707e-05	5367	5368	0.000125149	3970	3971	0.000104369
FYNFRGLL	TTCTACAACTTCAGGGGTCTCCTA	Pool 13	11122	11123	0.000273358	2260	2261	4.53807e-05	8255	8256	0.000183051	3982	3983	7.92913e-05	7088	7089	0.000180575	3554	7301	7302	0.000257033	10223	10224	0.000242757	24193	24194	0.000563878	1528	1529	4.28523e-05	3744	3745	8.13876e-05	982	983	2.29176e-05	20713	20714	0.000544423
FYNTFTAL	TTTTACAACACGTTCACTGCGTTA	Pool 13	5779	5780	0.000142049	937	938	1.88267e-05	6010	6011	0.000133275	4821	4822	9.59936e-05	140	141	3.59162e-06	533.5	3945	3946	0.0001389	5940	5941	0.000141062	3799	3800	8.85648e-05	1529	1530	4.28803e-05	512	513	1.11487e-05	826	827	1.92806e-05	1534	1535	4.03442e-05
FYPQYGAL	TTTTATCCGCAGTATGGGGCACTC	Pool 13	8387	8388	0.000206143	1579	1580	3.17123e-05	1885	1886	4.18163e-05	4751	4752	9.46001e-05	6416	6417	0.000163457	3402	6212	6213	0.0002187	8234	8235	0.00019553	7638	7639	0.000178039	39129	39130	0.00109667	2485	2486	5.40266e-05	12664	12665	0.000295271	7345	7346	0.000193074
FYRTWTHL	TTTTATCGAACCTGGACCCACTTG	Pool 13	6968	6969	0.00017127	2493	2494	5.00572e-05	4625	4626	0.000102567	9557	9558	0.000190275	4034	4035	0.000102782	2815	4633	4634	0.000163118	7508	7509	0.000178292	3405	3406	7.9382e-05	21736	21737	0.000609209	612	613	1.33219e-05	4908	4909	0.000114448	6712	6713	0.000176437
FYTLYENL	TTCTACACACTATACGAAAATTTA	Pool 13	1202	1203	2.95649e-05	2	3	6.02132e-08	3779	3780	8.38099e-05	222	223	4.43936e-06	34	35	8.91538e-07	324	927	928	3.26659e-05	1268	1269	3.01309e-05	2	3	6.99196e-08	306	307	8.60409e-06	31	32	6.95435e-07	NA	1	2.3314e-08	207	208	5.46683e-06
FYYMAVSL	TTCTATTACATGGCAGTAAGCCTC	Pool 13	4625	4626	0.000113688	11107	11108	0.000222949	5183	5184	0.000114939	968	969	1.92903e-05	2744	2745	6.9922e-05	2374	3606	3607	0.000126968	5213	5214	0.0001238	454	455	1.06045e-05	46	47	1.31724e-06	5340	5341	0.000116072	6397	6398	0.000149163	8158	8159	0.000214442
GAIRFFAF	GGGGCCATCCGATTCTTTGCCTTC	Pool 13	4072	4073	0.000100098	124	125	2.50888e-06	1681	1682	3.72932e-05	1054	1055	2.10023e-05	1909	1910	4.86525e-05	1983.5	3055	3056	0.000107572	4719	4720	0.000112071	3361	3362	7.83565e-05	5487	5488	0.000153809	312	313	6.80222e-06	624	625	1.45712e-05	3846	3847	0.00010111
GALLFSKL	GGCGCTCTATTATTTTCGAAGCTA	Pool 13	4699	4700	0.000115507	790	791	1.58762e-05	2168	2169	4.80909e-05	1967	1968	3.91778e-05	2712	2713	6.91069e-05	2360.5	3214	3215	0.000113169	5720	5721	0.000135838	440	441	1.02782e-05	7092	7093	0.000198791	2077	2078	4.51598e-05	4454	4455	0.000103864	3468	3469	9.11752e-05
GALVFQAL	GGTGCTTTGGTCTTCCAAGCGCTC	Pool 13	2562	2563	6.29882e-05	755	756	1.51737e-05	3246	3247	7.19922e-05	123	124	2.46852e-06	1069	1070	2.72556e-05	1424	1554	1555	5.47365e-05	2771	2772	6.58178e-05	348	349	8.13398e-06	40	41	1.14908e-06	11538	11539	0.000250769	2365	2366	5.51608e-05	1769	1770	4.65206e-05
GAPGFINL	GGTGCGCCTGGTTTTATTAACCTA	Pool 13	11406	11407	0.000280338	5168	5169	0.000103747	9308	9309	0.000206398	1495	1496	2.97815e-05	4105	4106	0.00010459	2831.5	7043	7044	0.000247951	12412	12413	0.000294732	2806	2807	6.54214e-05	2866	2867	8.03516e-05	4786	4787	0.000104033	5054	5055	0.000117852	9179	9180	0.000241277
GASSFFPL	GGCGCATCATCATTCTTTCCCTTA	Pool 13	7347	7348	0.000180584	3448	3449	6.92251e-05	605	606	1.34362e-05	5678	5679	0.000113054	7091	7092	0.000180651	3556	5810	5811	0.000204549	7753	7754	0.000184109	7366	7367	0.000171699	15701	15702	0.00044007	18704	18705	0.000406503	9054	9055	0.000211108	1758	1759	4.62315e-05
GAYLYSNS	GGAGCTTATCTTTACTCGAATTCC	Pool 13	5358	5359	0.000131703	863	864	1.73414e-05	3396	3397	7.5318e-05	10196	10197	0.000202996	1210	1211	3.08472e-05	1534.5	4247	4248	0.000149531	5611	5612	0.00013325	7221	7222	0.00016832	318	319	8.94041e-06	1623	1624	3.52933e-05	6	7	1.63198e-07	2457	2458	6.46032e-05
GFEYINPL	GGCTTTGAGTACATAAACCCACTA	Pool 13	3624	3625	8.90879e-05	2105	2106	4.22696e-05	4756	4757	0.000105472	1261	1262	2.51232e-05	1807	1808	4.60543e-05	1921	2099	2100	7.39207e-05	3585	3586	8.51453e-05	643	644	1.50094e-05	17	18	5.04475e-07	360	361	7.84538e-06	2327	2328	5.42749e-05	444	445	1.16959e-05
GFFRMPQL	GGATTCTTCAGAATGCCGCAACTG	Pool 13	4185	4186	0.000102875	2271	2272	4.56014e-05	2848	2849	6.31678e-05	679	680	1.3537e-05	1549	1550	3.94824e-05	1782	2768	2769	9.74697e-05	4009	4010	9.52127e-05	3258	3259	7.5956e-05	305	306	8.57607e-06	31368	31369	0.000681722	86	87	2.02831e-06	5977	5978	0.000157119
GFLAFTQL	GGATTCTTAGCGTTCACACAGCTA	Pool 13	3691	3692	9.07345e-05	508	509	1.02162e-05	38	39	8.64705e-07	1069	1070	2.13009e-05	2258	2259	5.75424e-05	2151.5	2247	2248	7.91303e-05	3367	3368	7.99691e-05	812	813	1.89482e-05	9	10	2.80264e-07	4254	4255	9.24711e-05	22299	22300	0.000519901	152	153	4.02128e-06
GFRNFLLL	GGATTCCGAAATTTCTTGCTTCTC	Pool 13	10190	10191	0.000250454	5038	5039	0.000101138	9494	9495	0.000210522	14933	14934	0.000297297	13686	13687	0.000348642	4279	7408	7409	0.000260799	9970	9971	0.000236749	8558	8559	0.000199481	23220	23221	0.0006508	23475	23476	0.000510188	3991	3992	9.30694e-05	5994	5995	0.000157566
GFSSYSSL	GGGTTCTCATCTTACAGCTCACTT	Pool 13	9125	9126	0.00022428	24094	24095	0.000483612	3185	3186	7.06398e-05	3624	3625	7.21644e-05	2750	2751	7.00749e-05	2376	6457	6458	0.000227324	8569	8570	0.000203484	1096	1097	2.55673e-05	10956	10957	0.000307085	91906	91907	0.00199735	2236	2237	5.21533e-05	7687	7688	0.000202063
GFVHWFPL	GGATTCGTCCACTGGTTTCCGTTA	Pool 13	4989	4990	0.000122634	321	322	6.46288e-06	1843	1844	4.0885e-05	4894	4895	9.74468e-05	3045	3046	7.75893e-05	2489.5	3267	3268	0.000115035	4736	4737	0.000112474	7109	7110	0.000165709	7772	7773	0.000217849	223	224	4.86804e-06	8088	8089	0.000188587	21591	21592	0.000567499
GGFSYADV	GGAGGCTTTAGCTATGCCGATGTC	Pool 13	5811	5812	0.000142835	704	705	1.41501e-05	1975	1976	4.38117e-05	2940	2941	5.85477e-05	465	466	1.18702e-05	923	2967	2968	0.000104475	4893	4894	0.000116202	2881	2882	6.71694e-05	5783	5784	0.000162105	652	653	1.41912e-05	702	703	1.63897e-05	777	778	2.04481e-05
GGFVKFLL	GGTGGCTTCGTAAAATTCCTGCTT	Pool 13	11477	11478	0.000282083	3977	3978	7.98427e-05	5533	5534	0.000122699	5138	5139	0.000102304	9815	9816	0.000250038	3934	5747	5748	0.000202331	10303	10304	0.000244656	18191	18192	0.000423992	1414	1415	3.96573e-05	59284	59285	0.0012884	13018	13019	0.000303525	5873	5874	0.000154385
GGFVYRGV	GGCGGGTTTGTCTACCGCGGCGTA	Pool 13	2073	2074	5.09705e-05	NA	1	2.00711e-08	2365	2366	5.24588e-05	128	129	2.56806e-06	26	27	6.87758e-07	296.5	1257	1258	4.4282e-05	1800	1801	4.27626e-05	95	96	2.23743e-06	7	8	2.24211e-07	NA	1	2.17323e-08	2222	2223	5.18269e-05	634	635	1.66896e-05
GGITFFPV	GGAGGAATCACGTTCTTCCCCGTT	Pool 13	15886	15887	0.000390438	14038	14039	0.000281778	5067	5068	0.000112367	59582	59583	0.00118614	5561	5562	0.000141678	3217	9013	9014	0.000317296	14068	14069	0.000334052	59317	59318	0.0013825	8927	8928	0.000250219	3461	3462	7.52374e-05	6108	6109	0.000142425	164177	164178	0.00431507
GGMAFILL	GGTGGGATGGCGTTCATTCTCCTG	Pool 13	7336	7337	0.000180314	1649	1650	3.31172e-05	1157	1158	2.56751e-05	9987	9988	0.000198835	2107	2108	5.3696e-05	2080	4818	4819	0.00016963	6737	6738	0.000159986	1221	1222	2.84806e-05	1267	1268	3.55374e-05	5048	5049	0.000109727	73	74	1.72523e-06	4446	4447	0.00011688
GGPFFFCL	GGCGGCCCGTTCTTCTTCTGTCTG	Pool 13	6513	6514	0.000160088	140	141	2.83002e-06	346	347	7.69366e-06	1220	1221	2.4307e-05	3522	3523	8.97397e-05	2658	3934	3935	0.000138513	6747	6748	0.000160223	4784	4785	0.000111522	12	13	3.64343e-07	11653	11654	0.000253269	211	212	4.94256e-06	741	742	1.95019e-05
GGWSFTNF	GGAGGTTGGTCCTTCACGAACTTT	Pool 13	2811	2812	6.91076e-05	867	868	1.74217e-05	299	300	6.65158e-06	1107	1108	2.20574e-05	3267	3268	8.32442e-05	2568	1886	1887	6.6423e-05	2946	2947	6.9973e-05	3377	3378	7.87294e-05	1143	1144	3.20622e-05	10205	10206	0.0002218	127	128	2.98419e-06	2016	2017	5.30125e-05
GGYFLPRL	GGCGGCTATTTTCTCCCGAGACTT	Pool 13	4447	4448	0.000109314	176	177	3.55258e-06	1185	1186	2.62959e-05	1442	1443	2.87264e-05	579	580	1.47741e-05	1039	2364	2365	8.32487e-05	4402	4403	0.000104544	12229	12230	0.000285039	334	335	9.38883e-06	29	30	6.5197e-07	3535	3536	8.24382e-05	922	923	2.42591e-05
GHLLFPGL	GGGCATCTGCTCTTCCCTGGGCTC	Pool 13	27173	27174	0.000667827	18436	18437	0.00037005	34939	34940	0.000774687	121333	121334	0.00241545	40588	40589	0.0010339	4870	15929	15930	0.000560741	26579	26580	0.00063111	51160	51161	0.00119239	2587	2588	7.25322e-05	24262	24263	0.000527292	9586	9587	0.000223511	12400	12401	0.000325934
GHMLFFLL	GGCCATATGCTATTCTTCTTGCTT	Pool 13	15802	15803	0.000388374	12690	12691	0.000254722	36284	36285	0.000804508	8367	8368	0.000166585	3042	3043	7.75128e-05	2484.5	10077	10078	0.000354749	16718	16719	0.000396973	5943	5944	0.000138534	5667	5668	0.000158853	11128	11129	0.000241859	78574	78575	0.00183189	6228	6229	0.000163716
GHYPFAGI	GGTCACTATCCTTTTGCTGGCATC	Pool 13	9496	9497	0.000233398	4155	4156	8.34153e-05	5173	5174	0.000114718	1379	1380	2.74722e-05	2427	2428	6.18473e-05	2229.5	5091	5092	0.00017924	7677	7678	0.000182305	2791	2792	6.50718e-05	105	106	2.97079e-06	26529	26530	0.000576559	1477	1478	3.4458e-05	2985	2986	7.84806e-05
GIFFCMAL	GGAATTTTCTTCTGCATGGCGCTT	Pool 13	22652	22653	0.000556719	9949	9950	0.000199707	9152	9153	0.00020294	29562	29563	0.000588523	11524	11525	0.000293571	4119	15813	15814	0.000556658	24552	24553	0.000582982	25213	25214	0.000587651	5663	5664	0.000158741	11139	11140	0.000242098	12325	12326	0.000287368	3470	3471	9.12278e-05
GIFNRYNV	GGCATCTTTAACAGATATAATGTG	Pool 13	1294	1295	3.18259e-05	374	375	7.52665e-06	1	2	4.43439e-08	3	4	7.96297e-08	2301	2302	5.86377e-05	2167	864	865	3.04483e-05	1143	1144	2.71629e-05	4	5	1.16533e-07	6	7	1.96185e-07	18	19	4.12914e-07	NA	1	2.3314e-08	695	696	1.82929e-05
GIIQFIKL	GGGATAATTCAATTTATCAAACTC	Pool 13	1689	1690	4.15334e-05	264	265	5.31883e-06	463	464	1.02878e-05	294	295	5.87269e-06	211	212	5.40017e-06	626	927	928	3.26659e-05	1757	1758	4.17416e-05	2	3	6.99196e-08	9	10	2.80264e-07	191	192	4.17261e-06	60	61	1.42215e-06	369	370	9.72465e-06
GLSHFAAL	GGGCTAAGCCATTTTGCAGCATTG	Pool 13	5590	5591	0.000137404	2834	2835	5.69014e-05	4900	4901	0.000108665	3587	3588	7.14278e-05	4013	4014	0.000102247	2809	3323	3324	0.000117006	4627	4628	0.000109886	1721	1722	4.01338e-05	26	27	7.56712e-07	3138	3139	6.82178e-05	141	142	3.31058e-06	751	752	1.97647e-05
GLYYFLKI	GGTCTCTACTATTTCTTGAAAATT	Pool 13	8956	8957	0.000220127	1042	1043	2.09341e-05	5348	5349	0.000118598	2321	2322	4.6225e-05	3365	3366	8.57405e-05	2604	7410	7411	0.00026087	8840	8841	0.000209919	22689	22690	0.000528825	8999	9000	0.000252237	26248	26249	0.000570452	4076	4077	9.5051e-05	4839	4840	0.000127209
GMFKYEEI	GGAATGTTCAAATACGAGGAGATT	Pool 13	4451	4452	0.000109412	494	495	9.93517e-06	5022	5023	0.00011137	3854	3855	7.67431e-05	768	769	1.95884e-05	1200.5	2603	2604	9.16616e-05	4722	4723	0.000112142	3220	3221	7.50703e-05	4971	4972	0.000139347	4151	4152	9.02327e-05	684	685	1.59701e-05	4615	4616	0.000121322
GMFLQLYL	GGAATGTTTCTGCAACTCTATTTG	Pool 13	4579	4580	0.000112558	157	158	3.17123e-06	3288	3289	7.29235e-05	3554	3555	7.07709e-05	5469	5470	0.000139335	3200	3212	3213	0.000113099	5201	5202	0.000123515	6514	6515	0.000151842	194	195	5.46514e-06	4619	4620	0.000100403	23382	23383	0.00054515	2808	2809	7.38285e-05
GMFSFTGL	GGCATGTTCTCATTCACCGGATTG	Pool 13	5055	5056	0.000124256	664	665	1.33473e-05	366	367	8.1371e-06	485	486	9.67501e-06	1298	1299	3.30888e-05	1607.5	3344	3345	0.000117745	5307	5308	0.000126032	1379	1380	3.2163e-05	85	86	2.41027e-06	21545	21546	0.000468245	1660	1661	3.87245e-05	1859	1860	4.88861e-05
GMVVFWNL	GGCATGGTGGTCTTTTGGAATTTA	Pool 13	5946	5947	0.000146153	441	442	8.87141e-06	802	803	1.78041e-05	2118	2119	4.21838e-05	596	597	1.52071e-05	1057	2974	2975	0.000104721	4731	4732	0.000112356	322	323	7.52801e-06	1204	1205	3.37718e-05	4870	4871	0.000105858	5975	5976	0.000139324	1271	1272	3.34318e-05
GNFELVSL	GGGAACTTTGAACTTGTCTCGCTC	Pool 13	1588	1589	3.90512e-05	98	99	1.98703e-06	2186	2187	4.849e-05	528	529	1.0531e-05	18003	18004	0.000458607	4484	1299	1300	4.57604e-05	1683	1684	3.99846e-05	13	14	3.26291e-07	13	14	3.92369e-07	13415	13416	0.000291561	23986	23987	0.000559232	1811	1812	4.76245e-05
GNIVYTYV	GGAAATATAGTGTATACTTACGTA	Pool 13	4377	4378	0.000107594	100	101	2.02718e-06	7855	7856	0.000174183	2253	2254	4.48713e-05	689	690	1.7576e-05	1130.5	3728	3729	0.000131262	4908	4909	0.000116558	2392	2393	5.57725e-05	5998	5999	0.00016813	93	94	2.04284e-06	85	86	2.005e-06	6392	6393	0.000168026
GNTYFAFL	GGTAATACTTACTTCGCATTCTTG	Pool 13	8958	8959	0.000220176	82412	82413	0.00165412	183412	183413	0.00406662	5194	5195	0.000103419	43837	43838	0.00111666	4899	6278	6279	0.000221023	9572	9573	0.000227299	34985	34986	0.000815402	40685	40686	0.00114028	9504	9505	0.000206566	29921	29922	0.0006976	18969	18970	0.000498586
GNYFWVLL	GGAAACTACTTCTGGGTTCTATTG	Pool 13	3676	3677	9.03658e-05	634	635	1.27451e-05	275	276	6.11945e-06	625	626	1.2462e-05	1115	1116	2.84273e-05	1461.5	2500	2501	8.8036e-05	3399	3400	8.07289e-05	522	523	1.21893e-05	207	208	5.82948e-06	18	19	4.12914e-07	3	4	9.32559e-08	1568	1569	4.12378e-05
GQFDYALV	GGTCAGTTCGACTACGCACTAGTA	Pool 13	1825	1826	4.48757e-05	1303	1304	2.61727e-05	3327	3328	7.37882e-05	1147	1148	2.28537e-05	896	897	2.28488e-05	1293	1336	1337	4.70628e-05	1739	1740	4.13142e-05	439	440	1.02549e-05	8	9	2.52237e-07	4606	4607	0.000100121	103	104	2.42465e-06	681	682	1.79249e-05
GQFGFQRL	GGACAGTTTGGTTTCCAAAGACTT	Pool 13	5488	5489	0.000134897	2070	2071	4.15672e-05	51	52	1.15294e-06	824	825	1.64236e-05	5005	5006	0.000127515	3071	3573	3574	0.000125806	5540	5541	0.000131564	2314	2315	5.39546e-05	2977	2978	8.34625e-05	2279	2280	4.95497e-05	31	32	7.46047e-07	912	913	2.39962e-05
GQFLRVPL	GGACAATTTCTGCGCGTTCCTCTT	Pool 13	11976	11977	0.000294346	6278	6279	0.000126026	923	924	2.04869e-05	3595	3596	7.15871e-05	2891	2892	7.36665e-05	2424.5	8359	8360	0.000294275	11223	11224	0.0002665	909	910	2.12089e-05	133	134	3.75553e-06	6794	6795	0.000147671	2248	2249	5.24331e-05	4450	4451	0.000116985
GQFSFAEV	GGCCAATTTTCGTTCGCCGAGGTA	Pool 13	4678	4679	0.000114991	335	336	6.74388e-06	4009	4010	8.89094e-05	3178	3179	6.32857e-05	3083	3084	7.85572e-05	2507	3002	3003	0.000105707	5075	5076	0.000120524	2893	2894	6.74491e-05	291	292	8.1837e-06	11397	11398	0.000247705	645	646	1.50608e-05	1797	1798	4.72566e-05
GQYVCSPL	GGGCAATACGTCTGCAGCCCGTTA	Pool 13	4847	4848	0.000119144	282	283	5.68011e-06	10317	10318	0.00022877	851	852	1.69611e-05	1583	1584	4.03485e-05	1794.5	2612	2613	9.19784e-05	4433	4434	0.00010528	5531	5532	0.000128932	15	16	4.48422e-07	9264	9265	0.00020135	106	107	2.49459e-06	1177	1178	3.09612e-05
GSAPFLFL	GGTTCGGCACCGTTTCTGTTTCTA	Pool 13	21019	21020	0.000516587	1782	1783	3.57867e-05	18861	18862	0.000418207	9057	9058	0.000180321	15143	15144	0.000385756	4357	16159	16160	0.000568837	22113	22114	0.00052507	7377	7378	0.000171956	14080	14081	0.000394639	33285	33286	0.000723383	14479	14480	0.000337586	26626	26627	0.000699833
GSASFILL	GGGTCGGCGTCTTTCATCCTCTTG	Pool 13	11961	11962	0.000293978	150	151	3.03073e-06	3384	3385	7.5052e-05	4469	4470	8.89862e-05	1341	1342	3.41841e-05	1642	7925	7926	0.000278998	12274	12275	0.000291455	4068	4069	9.48343e-05	1881	1882	5.27456e-05	14118	14119	0.000306839	4546	4547	0.000106009	2517	2518	6.61802e-05
GSFFSLLL	GGTTCATTCTTCAGCTTGCTATTG	Pool 13	7243	7244	0.000178028	306	307	6.16181e-06	3169	3170	7.0285e-05	5247	5248	0.000104474	4305	4306	0.000109685	2881.5	5427	5428	0.000191067	6924	6925	0.000164426	7046	7047	0.000164241	277	278	7.79133e-06	3306	3307	7.18689e-05	23158	23159	0.000539928	3516	3517	9.24368e-05
GSFFTLNL	GGCTCATTCTTTACATTAAACTTG	Pool 13	2948	2949	7.24745e-05	3441	3442	6.90846e-05	12111	12112	0.000268546	1408	1409	2.80496e-05	2932	2933	7.47109e-05	2439.5	1843	1844	6.49094e-05	2995	2996	7.11364e-05	4	5	1.16533e-07	1747	1748	4.89901e-05	265	266	5.7808e-06	11	12	2.79768e-07	948	949	2.49424e-05
GSFHLIRL	GGGAGTTTTCACCTAATTCGTTTA	Pool 13	5313	5314	0.000130597	3454	3455	6.93455e-05	8162	8163	0.000180989	1486	1487	2.96023e-05	435	436	1.1106e-05	887.5	4027	4028	0.000141787	5630	5631	0.000133701	6731	6732	0.0001569	55	56	1.56948e-06	5719	5720	0.000124309	76942	76943	0.00179385	2369	2370	6.22903e-05
GSFLAANM	GGGTCTTTCCTTGCTGCTAATATG	Pool 13	3635	3636	8.93582e-05	567	568	1.14004e-05	1455	1456	3.22823e-05	2265	2266	4.51102e-05	1189	1190	3.03123e-05	1514	3456	3457	0.000121687	4098	4099	9.73258e-05	2277	2278	5.30923e-05	23063	23064	0.0006464	179	180	3.91182e-06	1003	1004	2.34072e-05	1662	1663	4.37084e-05
GSFPYDSV	GGTTCGTTTCCGTATGACTCTGTC	Pool 13	11083	11084	0.0002724	2213	2214	4.44373e-05	2125	2126	4.71375e-05	32455	32456	0.000646115	8165	8166	0.000208009	3712	7600	7601	0.000267558	10673	10674	0.000253441	27058	27059	0.000630651	9568	9569	0.000268184	3872	3873	8.41694e-05	1193	1194	2.78369e-05	12148	12149	0.00031931
GSFSMGML	GGGAGCTTCTCTATGGGTATGTTG	Pool 13	10711	10712	0.000263258	1288	1289	2.58716e-05	22199	22200	0.000492217	8240	8241	0.000164057	3859	3860	9.83239e-05	2753	9019	9020	0.000317507	12344	12345	0.000293117	682	683	1.59184e-05	190	191	5.35304e-06	752	753	1.63645e-05	11445	11446	0.000266852	1849	1850	4.86233e-05
GSFVSGQL	GGTTCCTTTGTGTCGGGGCAACTA	Pool 13	3748	3749	9.21353e-05	504	505	1.01359e-05	5706	5707	0.000126535	1410	1411	2.80894e-05	1216	1217	3.1e-05	1537	2860	2861	0.000100708	4084	4085	9.69934e-05	2308	2309	5.38148e-05	273	274	7.67922e-06	6807	6808	0.000147954	1511	1512	3.52507e-05	353	354	9.30413e-06
GSGAFMYL	GGTTCCGGAGCCTTCATGTATTTG	Pool 13	5669	5670	0.000139346	1649	1650	3.31172e-05	4744	4745	0.000105206	9347	9348	0.000186095	2171	2172	5.53263e-05	2108	4310	4311	0.000151749	5794	5795	0.000137595	3234	3235	7.53966e-05	484	485	1.35928e-05	2608	2609	5.66997e-05	13548	13549	0.000315881	1349	1350	3.54818e-05
GSGMFPPL	GGGAGTGGGATGTTCCCACCCCTT	Pool 13	1261	1262	3.10149e-05	75	76	1.5254e-06	1335	1336	2.96217e-05	29	30	5.97223e-07	38	39	9.93428e-07	337	642	643	2.26338e-05	879	880	2.08945e-05	1	2	4.66131e-08	1	2	5.60527e-08	2076	2077	4.51381e-05	4139	4140	9.65198e-05	309	310	8.14768e-06
GSIVFTFI	GGATCAATAGTGTTTACCTTTATC	Pool 13	25134	25135	0.000617717	2849	2850	5.72025e-05	72814	72815	0.00161445	16888	16889	0.000336216	9019	9020	0.000229762	3824	17082	17083	0.000601327	25889	25890	0.000614727	21623	21624	0.00050398	10991	10992	0.000308066	61306	61307	0.00133234	18319	18320	0.000427112	10250	10251	0.000269425
GSLPFFLL	GGCAGTCTCCCATTCTTCTTACTA	Pool 13	8847	8848	0.000217448	212552	212553	0.00426616	5645	5646	0.000125183	1472	1473	2.93236e-05	4764	4765	0.000121377	3014	6645	6646	0.000233941	10094	10095	0.000239694	3585	3586	8.35772e-05	7460	7461	0.000209105	3742	3743	8.13442e-05	206	207	4.82599e-06	4776	4777	0.000125553
GSQYFIFL	GGCTCCCAATATTTCATATTCTTA	Pool 13	6693	6694	0.000164511	415	416	8.34956e-06	14492	14493	0.000321338	13024	13025	0.000259294	2298	2299	5.85613e-05	2164	4870	4871	0.000171461	6989	6990	0.000165969	8489	8490	0.000197872	4970	4971	0.000139319	9972	9973	0.000216737	8394	8395	0.000195721	687	688	1.80826e-05
GSRFFKTL	GGGAGTAGGTTCTTTAAGACCCTA	Pool 13	5827	5828	0.000143229	1920	1921	3.85565e-05	4637	4638	0.000102833	9444	9445	0.000188026	1794	1795	4.57232e-05	1913	3503	3504	0.000123342	5414	5415	0.000128573	1185	1186	2.76415e-05	109	110	3.0829e-06	6988	6989	0.000151887	14	15	3.49709e-07	7049	7050	0.000185294
GSSFFSAL	GGCAGCTCGTTCTTTAGCGCCTTG	Pool 13	10539	10540	0.000259031	508	509	1.02162e-05	414	415	9.20135e-06	1211	1212	2.41278e-05	10549	10550	0.000268735	4017	4746	4747	0.000167096	8750	8751	0.000207782	2405	2406	5.60755e-05	10978	10979	0.000307701	621	622	1.35175e-05	433	434	1.01183e-05	2329	2330	6.1239e-05
GSYAMTEL	GGAAGTTATGCTATGACGGAATTG	Pool 13	4631	4632	0.000113836	477	478	9.59397e-06	39893	39894	0.000884527	278	279	5.55417e-06	9462	9463	0.000241046	3889	3051	3052	0.000107431	3874	3875	9.20072e-05	1584	1585	3.69408e-05	332	333	9.33278e-06	2485	2486	5.40266e-05	36	37	8.62617e-07	5803	5804	0.000152546
GSYFGYSL	GGGAGCTATTTTGGGTATTCACTC	Pool 13	12874	12875	0.000316416	4756	4757	9.5478e-05	82272	82273	0.00182415	5955	5956	0.000118569	13020	13021	0.000331678	4229	9384	9385	0.000330355	12266	12267	0.000291265	18670	18671	0.000435156	3632	3633	0.00010182	5045	5046	0.000109661	76377	76378	0.00178067	22148	22149	0.000582139
GSYIMNYI	GGTTCATACATAATGAACTACATC	Pool 13	10352	10353	0.000254435	908	909	1.82446e-05	1842	1843	4.08629e-05	2498	2499	4.97487e-05	6189	6190	0.000157675	3351	7156	7157	0.000251929	11718	11719	0.000278254	1104	1105	2.57537e-05	382	383	1.07341e-05	4752	4753	0.000103294	804	805	1.87677e-05	4317	4318	0.000113489
GSYIYLSM	GGCTCTTACATCTACCTATCGATG	Pool 13	1322	1323	3.2514e-05	137	138	2.76981e-06	1658	1659	3.67832e-05	1535	1536	3.05778e-05	1576	1577	4.01701e-05	1793	631	632	2.22466e-05	1333	1334	3.16742e-05	202	203	4.73122e-06	4	5	1.40132e-07	3702	3703	8.04749e-05	3	4	9.32559e-08	863	864	2.27084e-05
GSYWYFDV	GGATCGTATTGGTACTTCGATGTG	Pool 13	4256	4257	0.00010462	9	10	2.00711e-07	134	135	2.99321e-06	1243	1244	2.47648e-05	82	83	2.11422e-06	442	2909	2910	0.000102433	3943	3944	9.36456e-05	496	497	1.15833e-05	9438	9439	0.000264541	8365	8366	0.000181813	53	54	1.25895e-06	457	458	1.20375e-05
GTALYNNL	GGGACAGCGTTGTACAACAACTTG	Pool 13	5939	5940	0.000145981	504	505	1.01359e-05	4651	4652	0.000103144	2862	2863	5.6995e-05	7847	7848	0.000199908	3668	3478	3479	0.000122462	6005	6006	0.000142605	1762	1763	4.10894e-05	19	20	5.60527e-07	1774	1775	3.85749e-05	9712	9713	0.000226449	3618	3619	9.51176e-05
GTILFMYL	GGGACGATTTTGTTTATGTATTTG	Pool 13	12236	12237	0.000300736	9963	9964	0.000199988	23591	23592	0.00052308	8260	8261	0.000164455	6467	6468	0.000164756	3416	9909	9910	0.000348835	12979	12980	0.000308195	15465	15466	0.000360459	585	586	1.64235e-05	20614	20615	0.000448012	189	190	4.42965e-06	3268	3269	8.59186e-05
GTISFFEI	GGAACGATAAGTTTCTTCGAGATA	Pool 13	4078	4079	0.000100245	21	22	4.41563e-07	8037	8038	0.000178218	1956	1957	3.89588e-05	1091	1092	2.7816e-05	1443.5	2010	2011	7.07878e-05	3001	3002	7.12789e-05	1354	1355	3.15803e-05	22	23	6.44606e-07	5	6	1.30394e-07	2866	2867	6.68411e-05	1237	1238	3.25382e-05
GTLEFTLL	GGCACACTTGAATTTACACTCTTA	Pool 13	4867	4868	0.000119636	1408	1409	2.82801e-05	1800	1801	3.99316e-05	4196	4197	8.35515e-05	482	483	1.23032e-05	941	3122	3123	0.000109931	5296	5297	0.000125771	11968	11969	0.000278956	57	58	1.62553e-06	392	393	8.54081e-06	6	7	1.63198e-07	1758	1759	4.62315e-05
GTLIYMYM	GGAACACTTATATACATGTATATG	Pool 13	3904	3905	9.59691e-05	119	120	2.40853e-06	421	422	9.35655e-06	691	692	1.37759e-05	1822	1823	4.64364e-05	1935	2262	2263	7.96583e-05	3388	3389	8.04677e-05	161	162	3.77566e-06	66	67	1.87777e-06	3939	3940	8.56254e-05	13700	13701	0.000319425	247	248	6.51815e-06
GTLNFTNV	GGAACTCTCAACTTTACCAATGTC	Pool 13	4720	4721	0.000116023	2472	2473	4.96357e-05	6174	6175	0.000136912	4243	4244	8.44871e-05	1665	1666	4.24372e-05	1846	3024	3025	0.000106481	4946	4947	0.000117461	187	188	4.38163e-06	13	14	3.92369e-07	2850	2851	6.19589e-05	2577	2578	6.01034e-05	1269	1270	3.33792e-05
GTLTFMYI	GGCACCCTGACATTTATGTACATA	Pool 13	10806	10807	0.000265592	3496	3497	7.01885e-05	20097	20098	0.000445611	27864	27865	0.00055472	12918	12919	0.000329079	4223	5784	5785	0.000203634	11378	11379	0.000270181	3452	3453	8.04774e-05	6137	6138	0.000172026	1735	1736	3.77273e-05	146	147	3.42715e-06	5347	5348	0.000140561
GTPRFFPL	GGGACGCCGCGGTTCTTCCCGCTT	Pool 13	604	605	1.48685e-05	NA	1	2.00711e-08	1337	1338	2.9666e-05	4	5	9.95371e-08	9	10	2.54725e-07	232.5	307	308	1.08417e-05	472	473	1.12308e-05	NA	1	2.33065e-08	NA	1	2.80264e-08	985	986	2.14281e-05	NA	1	2.3314e-08	NA	1	2.62828e-08
GTYILQTL	GGAACTTACATATTACAAACGCTG	Pool 13	2995	2996	7.36296e-05	3927	3928	7.88391e-05	158	159	3.52534e-06	3759	3760	7.48519e-05	1777	1778	4.52901e-05	1900.5	1948	1949	6.86054e-05	2938	2939	6.9783e-05	6	7	1.63146e-07	17126	17127	0.000480008	420	421	9.14932e-06	114	115	2.68111e-06	908	909	2.38911e-05
GTYKYLEV	GGGACGTACAAATACCTAGAAGTC	Pool 13	2743	2744	6.74364e-05	49	50	1.00355e-06	32	33	7.31674e-07	6521	6522	0.000129836	203	204	5.19639e-06	618.5	2064	2065	7.26886e-05	2818	2819	6.69338e-05	811	812	1.89249e-05	17	18	5.04475e-07	8708	8709	0.000189267	88	89	2.07494e-06	4151	4152	0.000109126
GVFVWTAL	GGGGTTTTCGTTTGGACAGCATTG	Pool 13	643	644	1.58269e-05	935	936	1.87865e-05	456	457	1.01326e-05	114	115	2.28935e-06	5	6	1.52835e-07	206	267	268	9.43368e-06	644	645	1.53148e-05	1	2	4.66131e-08	1254	1255	3.51731e-05	1	2	4.34647e-08	253	254	5.92175e-06	3	4	1.05131e-07
GVIHFLEL	GGTGTAATACATTTTCTGGAACTG	Pool 13	5892	5893	0.000144826	587	588	1.18018e-05	5724	5725	0.000126934	350801	350802	0.00698356	2988	2989	7.61373e-05	2460	4409	4410	0.000155233	6339	6340	0.000150536	12835	12836	0.000299163	682	683	1.9142e-05	11121	11122	0.000241707	2930	2931	6.83332e-05	700	701	1.84243e-05
GVILFLRL	GGCGTGATACTATTCCTCAGGTTA	Pool 13	1616	1617	3.97393e-05	62	63	1.26448e-06	317	318	7.05067e-06	10	11	2.18982e-07	196	197	5.01808e-06	609	1037	1038	3.65379e-05	1642	1643	3.90111e-05	4	5	1.16533e-07	6159	6160	0.000172642	43	44	9.56223e-07	NA	1	2.3314e-08	4	5	1.31414e-07
GVMALANL	GGGGTGATGGCGCTGGCTAACCTA	Pool 13	4041	4042	9.9336e-05	628	629	1.26247e-05	1483	1484	3.29031e-05	2190	2191	4.36172e-05	1789	1790	4.55958e-05	1907	2452	2453	8.63464e-05	3666	3667	8.70685e-05	676	677	1.57785e-05	10	11	3.0829e-07	5382	5383	0.000116985	218	219	5.10576e-06	377	378	9.93492e-06
GVYGFLTF	GGCGTTTATGGATTCCTTACATTT	Pool 13	19261	19262	0.000473382	6795	6796	0.000136403	5222	5223	0.000115804	8836	8837	0.000175922	30526	30527	0.000777599	4780	11790	11791	0.000415047	20174	20175	0.000479031	94783	94784	0.00220909	45404	45405	0.00127254	19873	19874	0.000431909	31114	31115	0.000725414	3605	3606	9.47759e-05
GVYHLSGL	GGCGTCTACCACTTGTCAGGGTTA	Pool 13	10429	10430	0.000256327	8447	8448	0.00016956	4264	4265	9.45633e-05	14449	14450	0.000287662	9570	9571	0.000243797	3900	6028	6029	0.000212223	9598	9599	0.000227917	1455	1456	3.39343e-05	3996	3997	0.000112021	5518	5519	0.000119941	2982	2983	6.95456e-05	4471	4472	0.000117537
GVYSAAAL	GGGGTGTATAGTGCTGCCGCTCTG	Pool 13	6156	6157	0.000151314	18296	18297	0.00036724	8452	8453	0.000187419	3037	3038	6.04788e-05	1343	1344	3.42351e-05	1644.5	4195	4196	0.000147701	6066	6067	0.000144054	371	372	8.67003e-06	14159	14160	0.000396853	23324	23325	0.000506907	2596	2597	6.05464e-05	12502	12503	0.000328614
GVYTHHPL	GGGGTGTACACCCACCATCCGTTG	Pool 13	4011	4012	9.85988e-05	479	480	9.63411e-06	312	313	6.93981e-06	63	64	1.27408e-06	216	217	5.52753e-06	634	2152	2153	7.57863e-05	2989	2990	7.0994e-05	NA	1	2.33065e-08	9	10	2.80264e-07	2541	2542	5.52436e-05	1121	1122	2.61583e-05	227	228	5.99249e-06
GYFQFRLV	GGGTACTTCCAGTTTCGGCTTGTT	Pool 13	10908	10909	0.000268099	5809	5810	0.000116613	23715	23716	0.000525829	4067	4068	8.09834e-05	8746	8747	0.000222808	3789	7129	7130	0.000250978	10551	10552	0.000250545	6193	6194	0.000144361	224	225	6.30593e-06	16492	16493	0.000358432	5541	5542	0.000129206	1984	1985	5.21714e-05
GYQFLSQL	GGGTATCAATTCTTATCTCAACTA	Pool 13	5025	5026	0.000123519	25561	25562	0.000513056	6636	6637	0.000147155	1009	1010	2.01065e-05	9337	9338	0.000237862	3874.5	3643	3644	0.00012827	5366	5367	0.000127433	4099	4100	9.55568e-05	2520	2521	7.06545e-05	9217	9218	0.000200329	28123	28124	0.000655682	2508	2509	6.59437e-05
GYRYYTCL	GGGTATCGGTATTACACATGTCTG	Pool 13	15379	15380	0.000377978	3365	3366	6.75592e-05	36899	36900	0.000818144	1752	1753	3.48977e-05	30445	30446	0.000775536	4779	9863	9864	0.000347216	14287	14288	0.000339251	2488	2489	5.80099e-05	216	217	6.08172e-06	3997	3998	8.68859e-05	546	547	1.27527e-05	8444	8445	0.000221959
GYYFFIVL	GGATACTACTTCTTTATCGTATTA	Pool 13	10573	10574	0.000259866	2076	2077	4.16876e-05	8162	8163	0.000180989	6274	6275	0.000124919	40861	40862	0.00104086	4874	8057	8058	0.000283644	10448	10449	0.000248099	3775	3776	8.80054e-05	336	337	9.44489e-06	7324	7325	0.000159189	6318	6319	0.000147321	2858	2859	7.51427e-05
HAEFFRNL	CACGCCGAATTCTTTCGCAACTTG	Pool 13	8533	8534	0.000209731	5465	5466	0.000109708	1116	1117	2.4766e-05	16086	16087	0.000320251	16727	16728	0.000426104	4430	6038	6039	0.000212575	9133	9134	0.000216876	6068	6069	0.000141447	68	69	1.93382e-06	17931	17932	0.000389704	28862	28863	0.000672911	13789	13790	0.00036244
HAYTLRML	CATGCATACACGCTAAGGATGCTA	Pool 13	2920	2921	7.17864e-05	1798	1799	3.61078e-05	1692	1693	3.75371e-05	672	673	1.33977e-05	2391	2392	6.09302e-05	2214.5	1454	1455	5.12165e-05	3018	3019	7.16825e-05	104771	104772	0.00244187	1506	1507	4.22357e-05	78777	78778	0.00171203	1785	1786	4.16387e-05	2957	2958	7.77447e-05
HAYYYCFI	CACGCGTATTATTATTGCTTCATC	Pool 13	6988	6989	0.000171761	2555	2556	5.13016e-05	754	755	1.67398e-05	1126	1127	2.24357e-05	1236	1237	3.15095e-05	1559.5	4211	4212	0.000148264	7276	7277	0.000172784	584	585	1.36343e-05	31	32	8.96844e-07	1911	1912	4.15522e-05	1058	1059	2.46895e-05	362	363	9.54067e-06
HFFFSNPL	CACTTCTTCTTCAGCAACCCGTTG	Pool 13	2174	2175	5.34527e-05	16	17	3.41208e-07	16	17	3.76923e-07	17	18	3.58334e-07	1360	1361	3.46681e-05	1656.5	1397	1398	4.921e-05	1862	1863	4.42347e-05	132	133	3.09977e-06	24	25	7.00659e-07	108	109	2.36883e-06	2	3	6.99419e-08	9	10	2.62828e-07
HFFRFLGL	CATTTCTTCCGGTTCCTAGGGTTG	Pool 13	2761	2762	6.78788e-05	182	183	3.673e-06	1078	1079	2.39235e-05	1080	1081	2.15199e-05	14107	14108	0.000359366	4301	2343	2344	8.25095e-05	3099	3100	7.36058e-05	1591	1592	3.7104e-05	10	11	3.0829e-07	1705	1706	3.70754e-05	148	149	3.47378e-06	419	420	1.10388e-05
HFYSLSYL	CATTTCTACAGCTTGTCCTACCTT	Pool 13	6504	6505	0.000159867	117267	117268	0.00235369	8983	8984	0.000199193	3645	3646	7.25825e-05	5750	5751	0.000146492	3255	5379	5380	0.000189378	7531	7532	0.000178838	3380	3381	7.87994e-05	3091	3092	8.66575e-05	1950	1951	4.23998e-05	442	443	1.03281e-05	9419	9420	0.000247584
HGLFWANL	CACGGACTGTTCTGGGCTAATTTA	Pool 13	458	459	1.12804e-05	21	22	4.41563e-07	97	98	2.17285e-06	203	204	4.06111e-06	1369	1370	3.48973e-05	1662.5	152	153	5.38565e-06	488	489	1.16107e-05	NA	1	2.33065e-08	NA	1	2.80264e-08	534	535	1.16268e-05	115	116	2.70442e-06	3	4	1.05131e-07
HGLIFLPV	CATGGGCTCATCTTCTTGCCCGTC	Pool 13	3250	3251	7.98965e-05	5834	5835	0.000117115	542	543	1.20394e-05	105	106	2.11019e-06	1348	1349	3.43624e-05	1648.5	2039	2040	7.18086e-05	3687	3688	8.75671e-05	424	425	9.90527e-06	382	383	1.07341e-05	282	283	6.15025e-06	64	65	1.51541e-06	1232	1233	3.24067e-05
HGLVFLPV	CATGGTCTTGTCTTCCTCCCTGTG	Pool 13	9685	9686	0.000238043	2791	2792	5.60384e-05	10882	10883	0.000241297	6975	6976	0.000138874	21762	21763	0.000554358	4607	6585	6586	0.000231829	10964	10965	0.000260351	403	404	9.41584e-06	9270	9271	0.000259832	4693	4694	0.000102012	3323	3324	7.74956e-05	11922	11923	0.00031337
HGVSYFRL	CATGGAGTCTCGTATTTTCGCCTC	Pool 13	2819	2820	6.93042e-05	2	3	6.02132e-08	1	2	4.43439e-08	1660	1661	3.30662e-05	282	283	7.20872e-06	714	1713	1714	6.03333e-05	2721	2722	6.46306e-05	642	643	1.49861e-05	5	6	1.68158e-07	248	249	5.41135e-06	NA	1	2.3314e-08	51	52	1.36671e-06
HGYAFLNT	CACGGCTACGCCTTTCTTAACACG	Pool 13	3732	3733	9.17421e-05	353	354	7.10515e-06	1034	1035	2.29479e-05	1104	1105	2.19977e-05	2008	2009	5.11743e-05	2029	2122	2123	7.47303e-05	3829	3830	9.09388e-05	7	8	1.86452e-07	7715	7716	0.000216251	3074	3075	6.6827e-05	6	7	1.63198e-07	4438	4439	0.00011667
HGYEYPKV	CATGGTTATGAATATCCTAAAGTA	Pool 13	17867	17868	0.000439123	4475	4476	8.98381e-05	12483	12484	0.000276794	10482	10483	0.00020869	28251	28252	0.000719649	4745	12209	12210	0.000429796	18747	18748	0.000445149	4544	4545	0.000105928	10473	10474	0.000293548	8651	8652	0.000188028	36791	36792	0.000857767	17560	17561	0.000461553
HIFRYLPL	CACATCTTTCGGTACTTACCATTG	Pool 13	4065	4066	9.99259e-05	326	327	6.56324e-06	77	78	1.72941e-06	3692	3693	7.35181e-05	5189	5190	0.000132202	3114	2959	2960	0.000104193	3969	3970	9.42629e-05	1166	1167	2.71987e-05	2913	2914	8.16688e-05	115	116	2.52095e-06	3139	3140	7.32059e-05	462	463	1.2169e-05
HILYFRHL	CATATTCTGTACTTTCGACATTTA	Pool 13	12159	12160	0.000298844	1529	1530	3.07087e-05	13125	13126	0.000291029	2278	2279	4.5369e-05	7201	7202	0.000183453	3574	8255	8256	0.000290614	11665	11666	0.000276995	7229	7230	0.000168506	2196	2197	6.15739e-05	6461	6462	0.000140434	16674	16675	0.00038876	6571	6572	0.000172731
HLLHFLPL	CATTTGCTGCACTTCTTGCCTTTA	Pool 13	5072	5073	0.000124674	1371	1372	2.75375e-05	3543	3544	7.85773e-05	625	626	1.2462e-05	2485	2486	6.33247e-05	2257	4113	4114	0.000144814	4839	4840	0.00011492	2206	2207	5.14375e-05	13	14	3.92369e-07	4899	4900	0.000106488	275	276	6.43465e-06	2232	2233	5.86896e-05
HLYNLVHL	CATTTGTATAATCTCGTGCACTTG	Pool 13	4407	4408	0.000108331	65	66	1.32469e-06	3232	3233	7.16818e-05	381	382	7.60464e-06	962	963	2.453e-05	1348	2559	2560	9.01128e-05	3978	3979	9.44766e-05	3118	3119	7.26931e-05	618	619	1.73483e-05	1155	1156	2.51226e-05	2	3	6.99419e-08	302	303	7.9637e-06
HMQFFQHL	CACATGCAATTCTTTCAACATCTT	Pool 13	12826	12827	0.000315236	12129	12130	0.000243462	7110	7111	0.000157665	22657	22658	0.000451062	1541	1542	3.92786e-05	1778.5	8916	8917	0.000313881	13930	13931	0.000330775	5855	5856	0.000136483	831	832	2.33179e-05	10811	10812	0.00023497	1779	1780	4.14989e-05	9307	9308	0.000244641
HQYLYQYL	CACCAATACCTTTATCAGTATTTG	Pool 13	8122	8123	0.000199631	1112	1113	2.23391e-05	2219	2220	4.92217e-05	1296	1297	2.58199e-05	6567	6568	0.000167303	3434	5447	5448	0.000191771	9338	9339	0.000221743	3223	3224	7.51402e-05	31	32	8.96844e-07	731	732	1.59081e-05	667	668	1.55737e-05	6755	6756	0.000177567
HSFRFSEI	CACTCATTCCGTTTCTCGGAGATT	Pool 13	3427	3428	8.42464e-05	35	36	7.22558e-07	53	54	1.19728e-06	339	340	6.76852e-06	3375	3376	8.59952e-05	2607	1859	1860	6.54726e-05	3703	3704	8.7947e-05	2	3	6.99196e-08	20	21	5.88554e-07	1146	1147	2.4927e-05	7	8	1.86512e-07	157	158	4.15269e-06
HSFRVYDL	CACTCATTTAGGGTCTATGATCTG	Pool 13	3053	3054	7.5055e-05	60	61	1.22433e-06	519	520	1.15294e-05	2109	2110	4.20047e-05	518	519	1.32202e-05	976.5	2204	2205	7.76167e-05	3974	3975	9.43816e-05	110	111	2.58702e-06	3	4	1.12105e-07	35	36	7.82364e-07	4	5	1.1657e-07	196	197	5.17772e-06
HSFSFHGA	CATAGCTTTTCATTTCATGGAGCT	Pool 13	10670	10671	0.00026225	2636	2637	5.29274e-05	5021	5022	0.000111347	14232	14233	0.000283342	37647	37648	0.000958989	4854	6631	6632	0.000233448	11064	11065	0.000262725	664	665	1.54988e-05	17071	17072	0.000478466	11202	11203	0.000243467	1999	2000	4.66279e-05	3149	3150	8.2791e-05
HSHLFIRL	CATTCTCACCTGTTCATACGACTC	Pool 13	4626	4627	0.000113713	537	538	1.07982e-05	1183	1184	2.62516e-05	753	754	1.50102e-05	1160	1161	2.95736e-05	1494	2950	2951	0.000103876	4149	4150	9.85368e-05	5349	5350	0.00012469	6235	6236	0.000174772	129	130	2.8252e-06	4	5	1.1657e-07	9988	9989	0.000262539
HSIVYTQI	CACTCTATTGTCTACACTCAAATA	Pool 13	10364	10365	0.00025473	3273	3274	6.57126e-05	7650	7651	0.000169637	3886	3887	7.73802e-05	6973	6974	0.000177645	3521	6586	6587	0.000231864	10090	10091	0.000239599	521	522	1.2166e-05	119	120	3.36316e-06	4055	4056	8.81464e-05	10367	10368	0.000241719	16092	16093	0.00042297
HSLAWTAL	CATTCCCTGGCATGGACGGCACTT	Pool 13	1522	1523	3.74292e-05	1165	1166	2.34029e-05	191	192	4.25701e-06	287	288	5.73334e-06	457	458	1.16664e-05	917	785	786	2.76674e-05	1809	1810	4.29763e-05	238	239	5.57026e-06	972	973	2.72697e-05	106	107	2.32536e-06	1501	1502	3.50176e-05	51	52	1.36671e-06
HSLLFMRL	CACTCGTTACTATTTATGAGACTA	Pool 13	NA	1	2.4576e-08	NA	1	2.00711e-08	NA	1	2.21719e-08	NA	1	1.99074e-08	NA	1	2.54725e-08	64	NA	1	3.52003e-08	NA	1	2.37438e-08	NA	1	2.33065e-08	NA	1	2.80264e-08	NA	1	2.17323e-08	NA	1	2.3314e-08	NA	1	2.62828e-08
HSMFLMSL	CATTCCATGTTCTTGATGAGTTTG	Pool 13	12221	12222	0.000300367	3318	3319	6.66158e-05	12609	12610	0.000279588	6920	6921	0.000137779	15944	15945	0.000406159	4388	8042	8043	0.000283116	13234	13235	0.000314249	107300	107301	0.00250081	1206	1207	3.38278e-05	5973	5974	0.000129829	16489	16490	0.000384447	12326	12327	0.000323989
HSWHVAKL	CACTCCTGGCATGTCGCTAAGCTT	Pool 13	2097	2098	5.15604e-05	809	810	1.62576e-05	8444	8445	0.000187242	167	168	3.34445e-06	273	274	6.97947e-06	698.5	1442	1443	5.07941e-05	2443	2444	5.80299e-05	5	6	1.39839e-07	7	8	2.24211e-07	3161	3162	6.87177e-05	4	5	1.1657e-07	66	67	1.76095e-06
HSYCRMFL	CACAGTTACTGCAGGATGTTCCTA	Pool 13	9204	9205	0.000226222	2001	2002	4.01823e-05	10114	10115	0.000224269	1504	1505	2.99607e-05	4863	4864	0.000123898	3039	6041	6042	0.00021268	9582	9583	0.000227537	1616	1617	3.76867e-05	157	158	4.42817e-06	4778	4779	0.000103859	290	291	6.78436e-06	3060	3061	8.04518e-05
HTFRHTLL	CATACGTTCCGCCATACCCTCTTA	Pool 13	NA	1	2.4576e-08	NA	1	2.00711e-08	NA	1	2.21719e-08	NA	1	1.99074e-08	NA	1	2.54725e-08	64	NA	1	3.52003e-08	NA	1	2.37438e-08	NA	1	2.33065e-08	NA	1	2.80264e-08	NA	1	2.17323e-08	NA	1	2.3314e-08	NA	1	2.62828e-08
HTQPFASL	CACACCCAGCCATTCGCATCACTA	Pool 13	753	754	1.85303e-05	NA	1	2.00711e-08	196	197	4.36787e-06	130	131	2.60787e-06	2	3	7.64175e-08	162.5	497	498	1.75298e-05	552	553	1.31303e-05	NA	1	2.33065e-08	4	5	1.40132e-07	NA	1	2.17323e-08	NA	1	2.3314e-08	153	154	4.04756e-06
HVISYYHV	CATGTAATCTCCTATTATCATGTC	Pool 13	7659	7660	0.000188252	2576	2577	5.17231e-05	20998	20999	0.000465588	1542	1543	3.07172e-05	6265	6266	0.000159611	3364	4219	4220	0.000148545	6665	6666	0.000158276	2057	2058	4.79648e-05	40	41	1.14908e-06	2741	2742	5.95901e-05	6499	6500	0.000151541	9126	9127	0.000239884
HVLHFFHI	CATGTTCTACATTTCTTCCACATT	Pool 13	12517	12518	0.000307642	9756	9757	0.000195833	5153	5154	0.000114274	1246	1247	2.48246e-05	9712	9713	0.000247414	3921	8302	8303	0.000292268	13701	13702	0.000325338	32830	32831	0.000765177	35787	35788	0.00100301	8671	8672	0.000188463	1642	1643	3.83048e-05	5951	5952	0.000156435
HVYRYFSY	CACGTATACAGATACTTTAGCTAC	Pool 13	4606	4607	0.000113221	5309	5310	0.000106577	3369	3370	7.47194e-05	332	333	6.62917e-06	13269	13270	0.00033802	4247	2713	2714	9.55337e-05	3953	3954	9.3883e-05	11620	11621	0.000270845	141	142	3.97974e-06	8447	8448	0.000183595	9374	9375	0.000218568	4232	4233	0.000111255
IAAEFLFV	ATAGCTGCGGAGTTCCTTTTCGTG	Pool 13	3159	3160	7.766e-05	192	193	3.87371e-06	NA	1	2.21719e-08	470	471	9.3764e-06	82	83	2.11422e-06	442	2367	2368	8.33543e-05	3248	3249	7.71436e-05	3	4	9.32261e-08	481	482	1.35087e-05	2166	2167	4.7094e-05	NA	1	2.3314e-08	1760	1761	4.62841e-05
IAALMSFL	ATTGCAGCATTAATGTCCTTCTTG	Pool 13	15395	15396	0.000378372	106	107	2.1476e-06	9044	9045	0.000200545	10665	10666	0.000212333	4836	4837	0.000123211	3031	10427	10428	0.000367069	16435	16436	0.000390253	2919	2920	6.80551e-05	5471	5472	0.00015336	26450	26451	0.000574842	723	724	1.68793e-05	63158	63159	0.00166
IAASYGNV	ATCGCAGCGAGCTACGGAAACGTA	Pool 13	405	406	9.97784e-06	NA	1	2.00711e-08	440	441	9.77782e-06	11	12	2.38889e-07	NA	1	2.54725e-08	64	184	185	6.51206e-06	349	350	8.31033e-06	NA	1	2.33065e-08	NA	1	2.80264e-08	16	17	3.6945e-07	10	11	2.56454e-07	1	2	5.25657e-08
IAAVMAFL	ATTGCTGCTGTGATGGCCTTTCTG	Pool 13	187	188	4.62028e-06	19	20	4.01421e-07	75	76	1.68507e-06	33	34	6.76852e-07	38	39	9.93428e-07	337	93	94	3.30883e-06	181	182	4.32137e-06	8	9	2.09759e-07	17	18	5.04475e-07	10	11	2.39056e-07	NA	1	2.3314e-08	34	35	9.199e-07
IADQFHRL	ATAGCCGACCAATTCCATAGACTG	Pool 13	6945	6946	0.000170705	5596	5597	0.000112338	2236	2237	4.95986e-05	4977	4978	9.90992e-05	3004	3005	7.65449e-05	2465	4378	4379	0.000154142	7455	7456	0.000177034	16912	16913	0.000394183	262	263	7.37093e-06	1877	1878	4.08133e-05	867	868	2.02365e-05	4982	4983	0.000130967
IAESYQNI	ATAGCCGAGTCATATCAGAATATC	Pool 13	7857	7858	0.000193118	512	513	1.02965e-05	9974	9975	0.000221165	4629	4630	9.21714e-05	2167	2168	5.52244e-05	2106.5	4373	4374	0.000153966	7899	7900	0.000187576	2086	2087	4.86407e-05	76	77	2.15803e-06	582	583	1.267e-05	1226	1227	2.86062e-05	3203	3204	8.42102e-05
IAEYFVPL	ATTGCAGAATACTTTGTTCCGTTA	Pool 13	3905	3906	9.59937e-05	49	50	1.00355e-06	1154	1155	2.56086e-05	1219	1220	2.42871e-05	1381	1382	3.5203e-05	1673	3262	3263	0.000114859	4175	4176	9.91541e-05	8625	8626	0.000201042	5838	5839	0.000163646	1651	1652	3.59018e-05	15	16	3.73023e-07	11651	11652	0.000306248
IAFCALLL	ATCGCGTTCTGTGCATTGCTGCTA	Pool 13	14836	14837	0.000364634	691	692	1.38892e-05	2296	2297	5.09289e-05	5887	5888	0.000117215	5554	5555	0.0001415	3215	8844	8845	0.000311347	13262	13263	0.000314914	4471	4472	0.000104227	2325	2326	6.51893e-05	2286	2287	4.97019e-05	1338	1339	3.12174e-05	3709	3710	9.75094e-05
IAFCVAQF	ATAGCCTTTTGCGTAGCGCAATTC	Pool 13	3680	3681	9.04641e-05	680	681	1.36684e-05	14792	14793	0.000327989	3149	3150	6.27084e-05	963	964	2.45555e-05	1349.5	2539	2540	8.94088e-05	3725	3726	8.84694e-05	299	300	6.99196e-06	8	9	2.52237e-07	20	21	4.56379e-07	5254	5255	0.000122515	14512	14513	0.000381443
IAFETWEI	ATCGCATTTGAAACCTGGGAGATT	Pool 13	4244	4245	0.000104325	89	90	1.8064e-06	3557	3558	7.88877e-05	6214	6215	0.000123725	1868	1869	4.76081e-05	1959	2902	2903	0.000102187	5611	5612	0.00013325	2005	2006	4.67529e-05	564	565	1.58349e-05	7219	7220	0.000156908	1105	1106	2.57852e-05	2071	2072	5.44581e-05
IAFFYNRS	ATAGCCTTCTTCTATAATCGGAGT	Pool 13	7614	7615	0.000187146	441	442	8.87141e-06	8823	8824	0.000195645	6328	6329	0.000125994	5450	5451	0.000138851	3192	5615	5616	0.000197685	7745	7746	0.000183919	1668	1669	3.88986e-05	334	335	9.38883e-06	10305	10306	0.000223974	6773	6774	0.000157929	1468	1469	3.86095e-05
IAFHYKHS	ATTGCTTTTCACTACAAGCACAGT	Pool 13	13027	13028	0.000320176	5199	5200	0.000104369	4984	4985	0.000110527	6995	6996	0.000139272	9119	9120	0.000232309	3836	8287	8288	0.00029174	13648	13649	0.000324079	5582	5583	0.00013012	20140	20141	0.000564479	11578	11579	0.000251639	931	932	2.17286e-05	6996	6997	0.000183901
IAFNYILA	ATAGCATTCAACTATATTTTAGCC	Pool 13	5200	5201	0.00012782	362	363	7.28579e-06	896	897	1.98882e-05	204	205	4.08102e-06	10198	10199	0.000259794	3977	3293	3294	0.00011595	5165	5166	0.00012266	7759	7760	0.000180859	4626	4627	0.000129678	955	956	2.07761e-05	2046	2047	4.77237e-05	1560	1561	4.10275e-05
IAFSLWIV	ATTGCATTCTCCCTCTGGATCGTT	Pool 13	20175	20176	0.000495845	1190	1191	2.39046e-05	10889	10890	0.000241452	6217	6218	0.000123784	14464	14465	0.00036846	4323	13637	13638	0.000480062	20425	20426	0.000484991	9451	9452	0.000220293	34481	34482	0.000966405	44171	44172	0.000959961	9003	9004	0.000209919	11690	11691	0.000307273
IAFTFTCF	ATAGCGTTTACTTTTACGTGCTTT	Pool 13	13572	13573	0.00033357	59	60	1.20426e-06	84033	84034	0.0018632	11684	11685	0.000232618	13436	13437	0.000342274	4260	10520	10521	0.000370342	14092	14093	0.000334621	13589	13590	0.000316736	22782	22783	0.000638525	1558	1559	3.38807e-05	14937	14938	0.000348264	3840	3841	0.000100952
IAFTYNPR	ATAGCGTTTACCTATAATCCCCGA	Pool 13	4373	4374	0.000107495	5630	5631	0.00011302	4014	4015	8.90203e-05	7678	7679	0.000152869	1333	1334	3.39803e-05	1634	2505	2506	8.8212e-05	3702	3703	8.79233e-05	234	235	5.47703e-06	15	16	4.48422e-07	17	18	3.91182e-07	19	20	4.66279e-07	577	578	1.51915e-05
IAFVVFLV	ATTGCCTTCGTGGTCTTTCTGGTT	Pool 13	22552	22553	0.000554262	99556	99557	0.00199821	31112	31113	0.000689835	8910	8911	0.000177395	15081	15082	0.000384176	4352	14722	14723	0.000518254	24698	24699	0.000586448	4255	4256	9.91926e-05	833	834	2.3374e-05	32057	32058	0.000696695	14656	14657	0.000341713	5140	5141	0.00013512
IAHRYNDL	ATAGCCCATCGGTACAATGATCTT	Pool 13	5668	5669	0.000139321	195	196	3.93393e-06	546	547	1.2128e-05	3430	3431	6.83024e-05	513	514	1.30929e-05	968	3600	3601	0.000126756	5371	5372	0.000127552	2726	2727	6.35569e-05	28	29	8.12765e-07	5213	5214	0.000113312	832	833	1.94205e-05	1398	1399	3.67697e-05
IAIAIPML	ATCGCAATCGCAATCCCGATGTTG	Pool 13	6025	6026	0.000148095	6291	6292	0.000126287	1588	1589	3.52312e-05	14159	14160	0.000281889	3911	3912	9.96485e-05	2771	3960	3961	0.000139428	6405	6406	0.000152103	9179	9180	0.000213954	40	41	1.14908e-06	3533	3534	7.68021e-05	6956	6957	0.000162195	2394	2395	6.29474e-05
IAIDVAFL	ATAGCCATAGACGTTGCATTTCTA	Pool 13	2537	2538	6.23738e-05	NA	1	2.00711e-08	1123	1124	2.49212e-05	3261	3262	6.4938e-05	2816	2817	7.17561e-05	2398	1632	1633	5.74821e-05	2499	2500	5.93595e-05	574	575	1.34013e-05	5	6	1.68158e-07	4	5	1.08662e-07	61	62	1.44547e-06	4317	4318	0.000113489
IAILARYM	ATAGCTATATTGGCGCGATATATG	Pool 13	1689	1690	4.15334e-05	6298	6299	0.000126428	695	696	1.54317e-05	1192	1193	2.37496e-05	505	506	1.28891e-05	961	1206	1207	4.24868e-05	1960	1961	4.65616e-05	4	5	1.16533e-07	1350	1351	3.78636e-05	28	29	6.30238e-07	3	4	9.32559e-08	163	164	4.31039e-06
IAKRLFHL	ATTGCTAAGAGGCTCTTTCACCTA	Pool 13	8182	8183	0.000201105	1395	1396	2.80192e-05	8419	8420	0.000186688	1440	1441	2.86866e-05	5764	5765	0.000146849	3256	5950	5951	0.000209477	8955	8956	0.00021265	1215	1216	2.83407e-05	30	31	8.68817e-07	2234	2235	4.85718e-05	594	595	1.38718e-05	3498	3499	9.19637e-05
IALCFPTL	ATCGCGCTATGCTTTCCGACGCTC	Pool 13	2440	2441	5.99899e-05	70	71	1.42505e-06	2	3	6.65158e-08	187	188	3.7426e-06	1386	1387	3.53304e-05	1677.5	1034	1035	3.64323e-05	1603	1604	3.80851e-05	4	5	1.16533e-07	89	90	2.52237e-06	21	22	4.78112e-07	221	222	5.1757e-06	508	509	1.3378e-05
IALFVSFI	ATCGCCCTTTTCGTCAGCTTCATT	Pool 13	6256	6257	0.000153772	338	339	6.80409e-06	2470	2471	5.47868e-05	900	901	1.79366e-05	14611	14612	0.000372204	4336	5065	5066	0.000178325	7601	7602	0.0001805	2820	2821	6.57477e-05	528	529	1.48259e-05	2473	2474	5.37658e-05	23781	23782	0.000554453	1153	1154	3.03304e-05
IALLGSSL	ATCGCTCTACTCGGTTCGTCCCTC	Pool 13	2890	2891	7.10491e-05	209	210	4.21492e-06	123	124	2.74932e-06	5313	5314	0.000105788	707	708	1.80345e-05	1139	1713	1714	6.03333e-05	2820	2821	6.69813e-05	1606	1607	3.74536e-05	18	19	5.32501e-07	34077	34078	0.000740595	4	5	1.1657e-07	1184	1185	3.11452e-05
IALLNFSL	ATTGCGCTTCTTAATTTTAGTTTA	Pool 13	14132	14133	0.000347332	4125	4126	8.28132e-05	6596	6597	0.000146268	8073	8074	0.000160733	4395	4396	0.000111977	2911.5	11233	11234	0.00039544	15370	15371	0.000364966	17042	17043	0.000397213	6214	6215	0.000174184	12718	12719	0.000276414	16645	16646	0.000388084	7723	7724	0.000203009
IALLTFHI	ATCGCTTTGCTGACCTTCCACATA	Pool 13	5915	5916	0.000145391	245	246	4.93748e-06	1334	1335	2.95995e-05	5180	5181	0.00010314	1469	1470	3.74446e-05	1729.5	3091	3092	0.000108839	4766	4767	0.000113187	1116	1117	2.60334e-05	432	433	1.21354e-05	914	915	1.98851e-05	250	251	5.85181e-06	9837	9838	0.000258571
IAMKVELL	ATAGCGATGAAGGTTGAGTTGTTA	Pool 13	4889	4890	0.000120176	607	608	1.22032e-05	3164	3165	7.01742e-05	2918	2919	5.81098e-05	6868	6869	0.000174971	3493.5	2621	2622	9.22952e-05	4830	4831	0.000114706	6078	6079	0.00014168	1952	1953	5.47355e-05	5902	5903	0.000128286	471	472	1.10042e-05	3195	3196	8.4e-05
IAMWFIRC	ATCGCTATGTGGTTCATACGCTGC	Pool 13	1301	1302	3.19979e-05	4	5	1.00355e-07	2	3	6.65158e-08	2	3	5.97223e-08	21	22	5.60395e-07	284	777	778	2.73858e-05	1141	1142	2.71154e-05	339	340	7.92422e-06	2	3	8.40791e-08	319	320	6.95435e-06	69	70	1.63198e-06	734	735	1.93179e-05
IANLYLLL	ATCGCCAATTTGTACCTTCTTTTA	Pool 13	18915	18916	0.000464879	8116	8117	0.000162917	24936	24937	0.000552901	7511	7512	0.000149545	7960	7961	0.000202787	3681	12503	12504	0.000440145	20567	20568	0.000488363	12188	12189	0.000284083	3399	3400	9.52897e-05	25945	25946	0.000563867	3223	3224	7.51642e-05	10529	10530	0.000276758
IARFFKGL	ATAGCGCGGTTCTTTAAAGGCCTC	Pool 13	792	793	1.94887e-05	NA	1	2.00711e-08	136	137	3.03755e-06	1225	1226	2.44065e-05	4063	4064	0.00010352	2820	453	454	1.59809e-05	898	899	2.13457e-05	2	3	6.99196e-08	131	132	3.69948e-06	NA	1	2.17323e-08	424	425	9.90844e-06	29	30	7.88485e-07
IARLYHSI	ATCGCACGACTGTACCATTCAATT	Pool 13	7497	7498	0.000184271	5167	5168	0.000103727	1338	1339	2.96882e-05	2907	2908	5.78908e-05	11557	11558	0.000294411	4124	4856	4857	0.000170968	7708	7709	0.000183041	1514	1515	3.53094e-05	35	36	1.00895e-06	9809	9810	0.000213194	7028	7029	0.000163874	2881	2882	7.57472e-05
IATLVFGL	ATCGCCACTCTCGTCTTCGGTCTT	Pool 13	NA	1	2.4576e-08	NA	1	2.00711e-08	NA	1	2.21719e-08	NA	1	1.99074e-08	NA	1	2.54725e-08	64	NA	1	3.52003e-08	NA	1	2.37438e-08	1	2	4.66131e-08	NA	1	2.80264e-08	NA	1	2.17323e-08	NA	1	2.3314e-08	NA	1	2.62828e-08
IATRLMGL	ATCGCGACACGCTTAATGGGCTTG	Pool 13	1056	1057	2.59768e-05	6	7	1.40497e-07	147	148	3.28145e-06	1	2	3.98148e-08	3	4	1.0189e-07	188	537	538	1.89378e-05	919	920	2.18443e-05	3	4	9.32261e-08	6	7	1.96185e-07	3372	3373	7.33032e-05	8	9	2.09826e-07	3	4	1.05131e-07
IATYRNLL	ATAGCAACGTATCGAAATTTACTT	Pool 13	6586	6587	0.000161882	2969	2970	5.9611e-05	2253	2254	4.99755e-05	2776	2777	5.52829e-05	9182	9183	0.000233914	3846	4071	4072	0.000143336	6421	6422	0.000152483	4974	4975	0.00011595	70	71	1.98987e-06	1030	1031	2.2406e-05	259	260	6.06163e-06	5627	5628	0.00014792
IAVAYTHF	ATTGCGGTCGCATACACCCATTTT	Pool 13	1872	1873	4.60308e-05	130	131	2.62931e-06	48	49	1.08642e-06	100	101	2.01065e-06	252	253	6.44454e-06	669.5	1480	1481	5.21317e-05	2182	2183	5.18327e-05	1	2	4.66131e-08	6	7	1.96185e-07	1313	1314	2.85563e-05	253	254	5.92175e-06	5926	5927	0.000155778
IAVDFFSF	ATCGCTGTCGACTTCTTCAGCTTT	Pool 13	12828	12829	0.000315285	800	801	1.60769e-05	4266	4267	9.46076e-05	3872	3873	7.71015e-05	6451	6452	0.000164349	3410	8509	8510	0.000299555	12415	12416	0.000294803	7094	7095	0.00016536	3701	3702	0.000103754	2277	2278	4.95063e-05	13467	13468	0.000313992	133702	133703	0.0035141
IAVGIYLL	ATAGCGGTTGGCATCTACCTCCTA	Pool 13	6092	6093	0.000149741	934	935	1.87664e-05	849	850	1.88461e-05	172	173	3.44398e-06	1777	1778	4.52901e-05	1900.5	3379	3380	0.000118977	5860	5861	0.000139162	1021	1022	2.38193e-05	19	20	5.60527e-07	5339	5340	0.000116051	76	77	1.79518e-06	2961	2962	7.78498e-05
IAVLFLAI	ATAGCAGTACTCTTTCTGGCCATC	Pool 13	17084	17085	0.00041988	2464	2465	4.94752e-05	10590	10591	0.000234823	6311	6312	0.000125656	23600	23601	0.000601177	4662	10748	10749	0.000378368	17363	17364	0.000412287	5690	5691	0.000132637	12861	12862	0.000360475	37981	37982	0.000825438	13321	13322	0.000310589	2670	2671	7.02015e-05
IAVQFVDM	ATTGCCGTGCAGTTTGTAGACATG	Pool 13	3060	3061	7.5227e-05	44	45	9.03198e-07	712	713	1.58086e-05	3086	3087	6.14542e-05	94	95	2.41989e-06	468.5	1842	1843	6.48742e-05	3241	3242	7.69774e-05	2663	2664	6.20886e-05	3688	3689	0.000103389	48	49	1.06488e-06	73	74	1.72523e-06	272	273	7.17522e-06
IAVRYAVI	ATAGCTGTACGCTATGCGGTCATA	Pool 13	7661	7662	0.000188301	3854	3855	7.73739e-05	656	657	1.4567e-05	2890	2891	5.75524e-05	2306	2307	5.87651e-05	2169	4306	4307	0.000151608	6770	6771	0.000160769	296	297	6.92204e-06	30	31	8.68817e-07	21795	21796	0.000473678	17049	17050	0.000397503	697	698	1.83454e-05
IAVSYTYI	ATTGCCGTGTCTTATACTTACATC	Pool 13	36723	36724	0.000902528	8426	8427	0.000169139	34884	34885	0.000773468	36952	36953	0.000735639	19390	19391	0.000493937	4535	26373	26374	0.000928373	40971	40972	0.000972831	43194	43195	0.00100673	1213	1214	3.4024e-05	79305	79306	0.00172351	23450	23451	0.000546736	24540	24541	0.000645007
IAVTILAL	ATAGCTGTAACCATACTGGCCTTA	Pool 13	1684	1685	4.14105e-05	153	154	3.09094e-06	4791	4792	0.000106248	652	653	1.29995e-05	3033	3034	7.72836e-05	2476.5	780	781	2.74914e-05	1697	1698	4.0317e-05	5	6	1.39839e-07	5	6	1.68158e-07	1293	1294	2.81217e-05	26	27	6.29477e-07	6372	6373	0.000167501
IAWALRDL	ATTGCATGGGCCCTGAGAGACCTT	Pool 13	3991	3992	9.81072e-05	916	917	1.84052e-05	1123	1124	2.49212e-05	1290	1291	2.57005e-05	6107	6108	0.000155586	3330	1808	1809	6.36774e-05	4071	4072	9.66848e-05	6773	6774	0.000157878	970	971	2.72136e-05	175150	175151	0.00380644	745	746	1.73922e-05	1054	1055	2.77284e-05
IAWFLQEL	ATCGCTTGGTTCCTGCAGGAGTTG	Pool 13	4906	4907	0.000120594	2121	2122	4.25908e-05	2684	2685	5.95316e-05	207	208	4.14074e-06	1073	1074	2.73575e-05	1428	3151	3152	0.000110951	4791	4792	0.00011378	4	5	1.16533e-07	4909	4910	0.000137609	140	141	3.06426e-06	4853	4854	0.000113166	17	18	4.73091e-07
IAYCRNNL	ATTGCGTATTGTCGTAACAATTTA	Pool 13	4291	4292	0.00010548	161	162	3.25151e-06	4162	4163	9.23017e-05	523	524	1.04315e-05	1231	1232	3.13821e-05	1553.5	3142	3143	0.000110635	4389	4390	0.000104235	290	291	6.7822e-06	20251	20252	0.00056759	2577	2578	5.6026e-05	1671	1672	3.8981e-05	689	690	1.81352e-05
IAYEMVCL	ATCGCCTACGAAATGGTATGTTTA	Pool 13	15176	15177	0.000372989	1794	1795	3.60275e-05	18672	18673	0.000414016	16545	16546	0.000329388	62084	62085	0.00158146	4950	9566	9567	0.000336761	16513	16514	0.000392105	4158	4159	9.69318e-05	1002	1003	2.81104e-05	3134	3135	6.81309e-05	15810	15811	0.000368617	47176	47177	0.00123995
IAYGVSAF	ATCGCGTATGGGGTTTCCGCTTTC	Pool 13	7540	7541	0.000185327	1196	1197	2.40251e-05	8357	8358	0.000185313	333	334	6.64908e-06	4788	4789	0.000121988	3020	4920	4921	0.000173221	7556	7557	0.000179432	1267	1268	2.95527e-05	57	58	1.62553e-06	716	717	1.55821e-05	21774	21775	0.000507662	119	120	3.15394e-06
IAYIHLVA	ATCGCCTATATTCACTTGGTAGCT	Pool 13	30646	30647	0.00075318	8365	8366	0.000167914	47007	47008	0.00104226	30320	30321	0.000603613	57905	57906	0.00147501	4941	16962	16963	0.000597103	31637	31638	0.000751206	12844	12845	0.000299372	231193	231194	0.00647953	12064	12065	0.000262201	18389	18390	0.000428744	11572	11573	0.000304171
IAYILKQM	ATTGCGTACATCTTGAAGCAGATG	Pool 13	1443	1444	3.54877e-05	133	134	2.68952e-06	39	40	8.86877e-07	14	15	2.98611e-07	33	34	8.66065e-07	321	788	789	2.7773e-05	1432	1433	3.40249e-05	2	3	6.99196e-08	6	7	1.96185e-07	25	26	5.65041e-07	1372	1373	3.20101e-05	31	32	8.41051e-07
IAYKVLEV	ATTGCCTACAAAGTCCTAGAAGTA	Pool 13	2136	2137	5.25188e-05	6	7	1.40497e-07	576	577	1.27932e-05	2775	2776	5.5263e-05	280	281	7.15778e-06	711.5	987	988	3.47779e-05	1888	1889	4.4852e-05	538	539	1.25622e-05	7	8	2.24211e-07	688	689	1.49736e-05	82	83	1.93506e-06	2480	2481	6.52077e-05
IAYPHEVV	ATAGCCTACCCGCACGAGGTCGTA	Pool 13	696	697	1.71294e-05	1610	1611	3.23345e-05	914	915	2.02873e-05	2	3	5.97223e-08	46	47	1.19721e-06	357.5	433	434	1.52769e-05	656	657	1.55997e-05	2	3	6.99196e-08	63	64	1.79369e-06	27	28	6.08506e-07	8	9	2.09826e-07	8	9	2.36546e-07
IAYRCFPG	ATAGCCTACCGGTGCTTTCCAGGT	Pool 13	1042	1043	2.56327e-05	4065	4066	8.16089e-05	527	528	1.17068e-05	219	220	4.37963e-06	1054	1055	2.68735e-05	1413.5	623	624	2.1965e-05	1445	1446	3.43335e-05	NA	1	2.33065e-08	13	14	3.92369e-07	124	125	2.71654e-06	4	5	1.1657e-07	10	11	2.89111e-07
IAYRQFTA	ATAGCCTACAGGCAGTTCACGGCT	Pool 13	2415	2416	5.93755e-05	60	61	1.22433e-06	4615	4616	0.000102346	72	73	1.45324e-06	258	259	6.59738e-06	676.5	886	887	3.12227e-05	2490	2491	5.91458e-05	4	5	1.16533e-07	2	3	8.40791e-08	1876	1877	4.07916e-05	1111	1112	2.59251e-05	2435	2436	6.4025e-05
IAYSCKLL	ATTGCTTACTCGTGCAAGCTCTTG	Pool 13	3050	3051	7.49813e-05	577	578	1.16011e-05	8653	8654	0.000191876	556	557	1.10884e-05	1185	1186	3.02104e-05	1509.5	2142	2143	7.54343e-05	3244	3245	7.70486e-05	5269	5270	0.000122825	2323	2324	6.51333e-05	646	647	1.40608e-05	66	67	1.56204e-06	4795	4796	0.000126053
IAYSLICV	ATAGCTTACTCGTTGATTTGTGTT	Pool 13	30040	30041	0.000738287	8200	8201	0.000164603	14710	14711	0.000326171	36248	36249	0.000721624	19168	19169	0.000488283	4525	19811	19812	0.000697389	31376	31377	0.000745009	7725	7726	0.000180066	102173	102174	0.00286357	42581	42582	0.000925407	45018	45019	0.00104957	24081	24082	0.000632943
IAYVMAAI	ATCGCGTATGTAATGGCCGCGATA	Pool 13	NA	1	2.4576e-08	NA	1	2.00711e-08	1	2	4.43439e-08	NA	1	1.99074e-08	NA	1	2.54725e-08	64	NA	1	3.52003e-08	NA	1	2.37438e-08	NA	1	2.33065e-08	NA	1	2.80264e-08	2	3	6.5197e-08	1	2	4.66279e-08	NA	1	2.62828e-08
ICFFCSYI	ATCTGCTTCTTTTGCTCGTACATA	Pool 13	32258	32259	0.000792796	22388	22389	0.000449371	47870	47871	0.00106139	30331	30332	0.000603832	48537	48538	0.00123638	4924	26022	26023	0.000916018	37032	37033	0.000879304	16286	16287	0.000379593	23601	23602	0.000661478	66178	66179	0.00143822	13122	13123	0.000305949	12188	12189	0.000320362
ICIVWFPL	ATTTGTATTGTGTGGTTCCCGTTA	Pool 13	5728	5729	0.000140796	6976	6977	0.000140036	4787	4788	0.000106159	1165	1166	2.32121e-05	1720	1721	4.38382e-05	1872	5067	5068	0.000178395	5678	5679	0.000134841	1318	1319	3.07413e-05	33	34	9.52897e-07	2325	2326	5.05494e-05	499	500	1.1657e-05	7918	7919	0.000208134
ICLRLALL	ATTTGCTTGAGGCTAGCACTACTA	Pool 13	5279	5280	0.000129761	1280	1281	2.5711e-05	32	33	7.31674e-07	5440	5441	0.000108316	2054	2055	5.2346e-05	2050	3277	3278	0.000115387	4846	4847	0.000115086	66	67	1.56154e-06	1679	1680	4.70843e-05	10831	10832	0.000235405	1577	1578	3.67894e-05	25111	25112	0.000660015
ICYIMAEI	ATCTGCTATATAATGGCCGAAATC	Pool 13	3929	3930	9.65835e-05	1860	1861	3.73522e-05	8	9	1.99547e-07	313	314	6.25093e-06	1627	1628	4.14692e-05	1822	2614	2615	9.20488e-05	3966	3967	9.41917e-05	641	642	1.49628e-05	14	15	4.20396e-07	501	502	1.09096e-05	698	699	1.62965e-05	2134	2135	5.61139e-05
ICYTAALL	ATTTGTTACACGGCCGCGCTACTA	Pool 13	3782	3783	9.29709e-05	57	58	1.16412e-06	2692	2693	5.9709e-05	13204	13205	0.000262878	2631	2632	6.70436e-05	2324.5	2496	2497	8.78952e-05	3860	3861	9.16748e-05	4377	4378	0.000102036	3726	3727	0.000104454	463	464	1.00838e-05	1518	1519	3.54139e-05	1564	1565	4.11327e-05
IDIVFAPL	ATTGACATCGTATTTGCCCCGCTC	Pool 13	5025	5026	0.000123519	13	14	2.80995e-07	2341	2342	5.19267e-05	1052	1053	2.09625e-05	2083	2084	5.30847e-05	2064	2361	2362	8.31431e-05	4793	4794	0.000113828	283	284	6.61905e-06	141	142	3.97974e-06	65	66	1.43433e-06	38	39	9.09245e-07	1786	1787	4.69674e-05
IDPIFMHL	ATCGACCCGATATTCATGCATCTA	Pool 13	3785	3786	9.30446e-05	3545	3546	7.1172e-05	653	654	1.45004e-05	102	103	2.05046e-06	1788	1789	4.55703e-05	1905.5	2703	2704	9.51816e-05	4626	4627	0.000109863	520	521	1.21427e-05	200	201	5.6333e-06	63	64	1.39087e-06	5369	5370	0.000125196	385	386	1.01452e-05
IEWIFLTL	ATAGAGTGGATCTTTCTAACCCTA	Pool 13	4820	4821	0.000118481	485	486	9.75453e-06	19791	19792	0.000438827	3755	3756	7.47723e-05	2011	2012	5.12507e-05	2030.5	2956	2957	0.000104087	4811	4812	0.000114255	71486	71487	0.00166611	40	41	1.14908e-06	4492	4493	9.76434e-05	710	711	1.65762e-05	2615	2616	6.87559e-05
IFAGFGLL	ATCTTCGCAGGTTTTGGACTGCTA	Pool 13	7797	7798	0.000191643	1131	1132	2.27204e-05	2859	2860	6.34117e-05	2348	2349	4.67625e-05	3910	3911	9.9623e-05	2768.5	3166	3167	0.000111479	7335	7336	0.000174185	2099	2100	4.89437e-05	31	32	8.96844e-07	10702	10703	0.000232601	510	511	1.19134e-05	30769	30770	0.000808723
IFCDFPPL	ATCTTCTGCGATTTCCCACCGCTG	Pool 13	1853	1854	4.55638e-05	4722	4723	9.47956e-05	1424	1425	3.1595e-05	17	18	3.58334e-07	1035	1036	2.63895e-05	1397.5	847	848	2.98499e-05	1527	1528	3.62805e-05	702	703	1.63845e-05	2966	2967	8.31542e-05	339	340	7.389e-06	1324	1325	3.0891e-05	815	816	2.14468e-05
IFDFMDTL	ATCTTTGATTTTATGGACACGTTG	Pool 13	4041	4042	9.9336e-05	651	652	1.30863e-05	2022	2023	4.48538e-05	2559	2560	5.0963e-05	3879	3880	9.88333e-05	2759	3300	3301	0.000116196	4398	4399	0.000104449	1245	1246	2.90399e-05	51763	51764	0.00145076	1326	1327	2.88388e-05	165	166	3.87012e-06	1285	1286	3.37997e-05
IFFASIGL	ATCTTCTTCGCCAGTATTGGCCTG	Pool 13	69	70	1.72032e-06	NA	1	2.00711e-08	1	2	4.43439e-08	NA	1	1.99074e-08	NA	1	2.54725e-08	64	22	23	8.09607e-07	83	84	1.99448e-06	NA	1	2.33065e-08	NA	1	2.80264e-08	NA	1	2.17323e-08	NA	1	2.3314e-08	NA	1	2.62828e-08
IFFCFSSF	ATTTTCTTTTGTTTCTCAAGCTTT	Pool 13	14755	14756	0.000362643	9516	9517	0.000191016	11407	11408	0.000252937	13449	13450	0.000267755	6586	6587	0.000167787	3437	14367	14368	0.000505758	15790	15791	0.000374938	16068	16069	0.000374513	145975	145976	0.00409118	9064	9065	0.000197004	17067	17068	0.000397923	11929	11930	0.000313554
IFFCIGLL	ATTTTCTTCTGTATAGGTTTACTA	Pool 13	6063	6064	0.000149029	966	967	1.94087e-05	3036	3037	6.73361e-05	5639	5640	0.000112278	9344	9345	0.000238041	3878	5216	5217	0.00018364	6708	6709	0.000159297	863	864	2.01368e-05	16348	16349	0.000458203	3352	3353	7.28685e-05	1417	1418	3.30592e-05	6707	6708	0.000176305
IFFFFYSV	ATTTTCTTCTTCTTCTACTCGGTC	Pool 13	29892	29893	0.000734649	7844	7845	0.000157457	35334	35335	0.000783445	59119	59120	0.00117693	46199	46200	0.00117683	4913	25810	25811	0.000908555	31119	31120	0.000738907	41472	41473	0.000966592	12050	12051	0.000337746	9356	9357	0.00020335	26147	26148	0.000609614	19024	19025	0.000500031
IFFHMAVM	ATTTTCTTCCACATGGCTGTAATG	Pool 13	5365	5366	0.000131875	1914	1915	3.84361e-05	548	549	1.21724e-05	347	348	6.92778e-06	2366	2367	6.02934e-05	2202	3395	3396	0.00011954	5163	5164	0.000122613	705	706	1.64544e-05	355	356	9.97739e-06	6764	6765	0.000147019	1503	1504	3.50642e-05	2197	2198	5.77697e-05
IFFLLAQV	ATTTTCTTCCTCTTGGCACAAGTA	Pool 13	8884	8885	0.000218357	283	284	5.70018e-06	3922	3923	8.69805e-05	2666	2667	5.30931e-05	7968	7969	0.00020299	3684	6522	6523	0.000229612	9988	9989	0.000237177	975	976	2.27472e-05	129	130	3.64343e-06	810	811	1.76249e-05	884	885	2.06329e-05	7417	7418	0.000194966
IFFLVPQV	ATCTTCTTCTTAGTTCCACAGGTC	Pool 13	11520	11521	0.00028314	3043	3044	6.10963e-05	22223	22224	0.000492749	9545	9546	0.000190036	6112	6113	0.000155713	3331	8120	8121	0.000285862	11128	11129	0.000264245	2642	2643	6.15991e-05	29037	29038	0.00081383	1792	1793	3.89661e-05	6371	6372	0.000148557	97724	97725	0.00256849
IFFMFIQI	ATCTTCTTTATGTTTATACAGATA	Pool 13	14805	14806	0.000363872	3681	3682	7.39016e-05	15046	15047	0.000333621	4988	4989	9.93181e-05	16338	16339	0.000416195	4408	10715	10716	0.000377207	13466	13467	0.000319758	33371	33372	0.000777785	13039	13040	0.000365464	4828	4829	0.000104945	46284	46285	0.00107909	12091	12092	0.000317812
IFFSLSLL	ATTTTCTTTTCCTTGTCTCTACTT	Pool 13	21397	21398	0.000525876	8424	8425	0.000169099	18751	18752	0.000415768	19484	19485	0.000387896	40764	40765	0.00103839	4872	19363	19364	0.000681619	23336	23337	0.000554109	136147	136148	0.00317314	99774	99775	0.00279633	14230	14231	0.000309273	5331	5332	0.00012431	20441	20442	0.000537274
IFFSYVLI	ATATTCTTCTCTTACGTGTTGATA	Pool 13	28069	28070	0.000689847	24262	24263	0.000486984	6253	6254	0.000138663	34032	34033	0.000677509	25415	25416	0.000647409	4703	21450	21451	0.000755082	30657	30658	0.000727938	49509	49510	0.00115391	3111	3112	8.72181e-05	3470	3471	7.5433e-05	13555	13556	0.000316044	12582	12583	0.000330717
IFFVEAFL	ATCTTCTTCGTTGAAGCGTTTCTT	Pool 13	5371	5372	0.000132022	1817	1818	3.64892e-05	2112	2113	4.68493e-05	3492	3493	6.95366e-05	3182	3183	8.1079e-05	2539	4876	4877	0.000171672	6554	6555	0.000155641	10926	10927	0.00025467	3433	3434	9.62425e-05	19351	19352	0.000420564	624	625	1.45712e-05	3005	3006	7.90062e-05
IFFVSAGL	ATATTCTTCGTGAGCGCAGGCTTG	Pool 13	3135	3136	7.70702e-05	1363	1364	2.73769e-05	848	849	1.8824e-05	5485	5486	0.000109212	302	303	7.71817e-06	736.5	1969	1970	6.93446e-05	3385	3386	8.03965e-05	1	2	4.66131e-08	6006	6007	0.000168354	2	3	6.5197e-08	626	627	1.46179e-05	391	392	1.03029e-05
IFIQHNGL	ATATTTATACAGCATAACGGACTG	Pool 13	760	761	1.87023e-05	71	72	1.44512e-06	168	169	3.74706e-06	24	25	4.97686e-07	130	131	3.3369e-06	519.5	728	729	2.5661e-05	712	713	1.69293e-05	1386	1387	3.23262e-05	2	3	8.40791e-08	2	3	6.5197e-08	4	5	1.1657e-07	6	7	1.8398e-07
IFIRWLSV	ATCTTCATCCGCTGGCTATCGGTC	Pool 13	6733	6734	0.000165495	2144	2145	4.30524e-05	15245	15246	0.000338033	1668	1669	3.32255e-05	9705	9706	0.000247236	3920	4274	4275	0.000150481	7580	7581	0.000180002	14096	14097	0.000328552	11269	11270	0.000315857	6293	6294	0.000136783	2882	2883	6.72142e-05	19253	19254	0.00050605
IFIYVWPL	ATCTTCATCTATGTTTGGCCCCTA	Pool 13	44	45	1.10592e-06	NA	1	2.00711e-08	113	114	2.5276e-06	88	89	1.77176e-06	7	8	2.0378e-07	224	2	3	1.05601e-07	46	47	1.11596e-06	NA	1	2.33065e-08	1	2	5.60527e-08	1	2	4.34647e-08	NA	1	2.3314e-08	NA	1	2.62828e-08
IFKFSQTI	ATCTTTAAATTTTCCCAAACGATA	Pool 13	3697	3698	9.08819e-05	9212	9213	0.000184915	11297	11298	0.000250498	480	481	9.57547e-06	983	984	2.50649e-05	1362	2118	2119	7.45895e-05	3114	3115	7.39619e-05	2279	2280	5.31389e-05	33	34	9.52897e-07	125	126	2.73828e-06	65	66	1.53872e-06	41	42	1.10388e-06
IFKKLPNL	ATCTTCAAGAAGCTGCCAAACTTA	Pool 13	5896	5897	0.000144924	1592	1593	3.19732e-05	1292	1293	2.86683e-05	2282	2283	4.54487e-05	2167	2168	5.52244e-05	2106.5	3806	3807	0.000134008	6260	6261	0.00014866	3295	3296	7.68183e-05	1375	1376	3.85643e-05	620	621	1.34958e-05	819	820	1.91175e-05	3595	3596	9.45131e-05
IFLAYAQL	ATATTCCTGGCATACGCCCAACTT	Pool 13	6242	6243	0.000153428	280	281	5.63997e-06	621	622	1.37909e-05	34622	34623	0.000689255	2813	2814	7.16796e-05	2395.5	4268	4269	0.00015027	6186	6187	0.000146903	608	609	1.41937e-05	220	221	6.19383e-06	445	446	9.69262e-06	2009	2010	4.68611e-05	1596	1597	4.19737e-05
IFLFITYL	ATCTTTCTTTTCATTACGTATCTT	Pool 13	44303	44304	0.00108881	14764	14765	0.000296349	58157	58158	0.00128947	45895	45896	0.000913671	29140	29141	0.000742294	4758	43397	43398	0.00152762	50115	50116	0.00118994	144295	144296	0.00336304	12944	12945	0.000362801	25592	25593	0.000556196	85672	85673	0.00199738	34556	34557	0.000908256
IFLFLTAI	ATCTTTCTATTTCTTACCGCGATC	Pool 13	14880	14881	0.000365715	8036	8037	0.000161311	14752	14753	0.000327102	13086	13087	0.000260528	15030	15031	0.000382877	4350	12352	12353	0.000434829	16640	16641	0.000395121	17119	17120	0.000399008	1092	1093	3.06328e-05	15842	15843	0.000344305	2692	2693	6.27845e-05	4201	4202	0.000110441
IFLFLTFL	ATATTCTTGTTCCTGACATTTCTC	Pool 13	9063	9064	0.000222757	3631	3632	7.28981e-05	12267	12268	0.000272005	1977	1978	3.93769e-05	4854	4855	0.000123669	3035	7327	7328	0.000257948	9831	9832	0.000233449	14325	14326	0.000333889	2451	2452	6.87207e-05	17786	17787	0.000386553	5188	5189	0.000120976	1938	1939	5.09624e-05
IFLGMGTL	ATTTTCTTGGGGATGGGTACCTTG	Pool 13	6559	6560	0.000161218	35540	35541	0.000713345	4352	4353	9.65144e-05	954	955	1.90116e-05	6147	6148	0.000156605	3344	6155	6156	0.000216693	6705	6706	0.000159226	3379	3380	7.87761e-05	3644	3645	0.000102156	3473	3474	7.54982e-05	950	951	2.21716e-05	4172	4173	0.000109678
IFLKLGGL	ATCTTCTTAAAATTGGGTGGACTC	Pool 13	6881	6882	0.000169132	7430	7431	0.000149148	10231	10232	0.000226863	789	790	1.57269e-05	5188	5189	0.000132177	3112.5	4725	4726	0.000166357	5813	5814	0.000138046	2841	2842	6.62371e-05	2659	2660	7.45501e-05	5493	5494	0.000119397	1839	1840	4.28977e-05	789	790	2.07634e-05
IFLRLGHI	ATATTTCTCCGGTTAGGACATATA	Pool 13	17293	17294	0.000425017	4908	4909	9.85288e-05	6356	6357	0.000140947	8300	8301	0.000165252	7039	7040	0.000179326	3539	10614	10615	0.000373651	17519	17520	0.000415991	1770	1771	4.12759e-05	63	64	1.79369e-06	550	551	1.19745e-05	105	106	2.47128e-06	12377	12378	0.000325329
IFLSALLL	ATCTTCTTATCGGCATTACTTTTG	Pool 13	10523	10524	0.000258637	235821	235822	0.0047332	4152	4153	9.208e-05	4995	4996	9.94575e-05	7113	7114	0.000181211	3558.5	7008	7009	0.000246719	10520	10521	0.000249809	19865	19866	0.000463007	852	853	2.39065e-05	5221	5222	0.000113486	8286	8287	0.000193203	2072	2073	5.44843e-05
IFLTTFPL	ATTTTCCTTACAACGTTTCCATTG	Pool 13	12994	12995	0.000319365	2285	2286	4.58824e-05	8622	8623	0.000191189	12602	12603	0.000250893	9976	9977	0.000254139	3953	9999	10000	0.000352003	14739	14740	0.000349984	10894	10895	0.000253925	7495	7496	0.000210086	1424	1425	3.09686e-05	10273	10274	0.000239528	6670	6671	0.000175333
IFMQHQRI	ATCTTCATGCAGCACCAGCGAATA	Pool 13	3998	3999	9.82793e-05	2847	2848	5.71624e-05	2724	2725	6.04185e-05	285	286	5.69352e-06	1271	1272	3.2401e-05	1578	1981	1982	6.9767e-05	3465	3466	8.2296e-05	1473	1474	3.43538e-05	7	8	2.24211e-07	65	66	1.43433e-06	NA	1	2.3314e-08	397	398	1.04606e-05
IFMYEEGL	ATCTTCATGTACGAAGAGGGCTTA	Pool 13	1159	1160	2.85081e-05	NA	1	2.00711e-08	75	76	1.68507e-06	2	3	5.97223e-08	1947	1948	4.96204e-05	2001	947	948	3.33699e-05	1528	1529	3.63043e-05	1675	1676	3.90617e-05	146	147	4.11988e-06	20	21	4.56379e-07	6	7	1.63198e-07	237	238	6.25532e-06
IFNFLLTV	ATATTTAATTTCCTTTTGACAGTA	Pool 13	7246	7247	0.000178102	36	37	7.42629e-07	21069	21070	0.000467163	3088	3089	6.1494e-05	3854	3855	9.81965e-05	2752	5481	5482	0.000192968	6679	6680	0.000158609	1859	1860	4.33501e-05	9132	9133	0.000255965	966	967	2.10152e-05	49	50	1.1657e-06	7120	7121	0.00018716
IFPRFYFL	ATTTTCCCCAGGTTCTATTTTCTA	Pool 13	18847	18848	0.000463208	19245	19246	0.000386288	14853	14854	0.000329342	11883	11884	0.00023658	28575	28576	0.000727902	4748	12252	12253	0.000431309	18642	18643	0.000442656	79259	79260	0.00184728	46408	46409	0.00130068	45848	45849	0.000996406	7170	7171	0.000167184	7635	7636	0.000200696
IFPYEMLM	ATCTTTCCTTACGAAATGTTAATG	Pool 13	10495	10496	0.000257949	665	666	1.33673e-05	13029	13030	0.0002889	2989	2990	5.95232e-05	2402	2403	6.12104e-05	2218	7893	7894	0.000277871	11548	11549	0.000274217	23910	23911	0.000557282	15825	15826	0.000443545	22266	22267	0.000483914	10429	10430	0.000243165	10540	10541	0.000277047
IFQHYFGI	ATCTTCCAACATTATTTCGGTATT	Pool 13	14799	14800	0.000363724	13502	13503	0.000271019	3225	3226	7.15266e-05	29920	29921	0.00059565	4849	4850	0.000123542	3033	11764	11765	0.000414132	14697	14698	0.000348986	4924	4925	0.000114785	1863	1864	5.22411e-05	3005	3006	6.53274e-05	4883	4884	0.000113865	7933	7934	0.000208528
IFQKSSSL	ATATTCCAAAAGTCATCCTCGCTG	Pool 13	1470	1471	3.61512e-05	2	3	6.02132e-08	262	263	5.83122e-06	38	39	7.7639e-07	11631	11632	0.000296296	4133.5	912	913	3.21379e-05	1501	1502	3.56632e-05	3	4	9.32261e-08	NA	1	2.80264e-08	25	26	5.65041e-07	83	84	1.95837e-06	2581	2582	6.78623e-05
IFQMMNTL	ATATTCCAAATGATGAATACTCTA	Pool 13	713	714	1.75472e-05	39	40	8.02842e-07	7202	7203	0.000159704	2410	2411	4.79968e-05	501	502	1.27872e-05	954	705	706	2.48514e-05	825	826	1.96124e-05	15764	15765	0.000367427	3	4	1.12105e-07	33	34	7.389e-07	58	59	1.37552e-06	110	111	2.9174e-06
IFQNIANL	ATCTTCCAAAACATAGCAAATTTA	Pool 13	1810	1811	4.45071e-05	NA	1	2.00711e-08	115	116	2.57194e-06	69	70	1.39352e-06	5397	5398	0.000137501	3176	1058	1059	3.72771e-05	1744	1745	4.14329e-05	133	134	3.12307e-06	3	4	1.12105e-07	18	19	4.12914e-07	3300	3301	7.69594e-05	132	133	3.49562e-06
IFQRLTEL	ATATTCCAGAGGTTGACTGAATTA	Pool 13	4077	4078	0.000100221	115	116	2.32824e-06	3621	3622	8.03067e-05	471	472	9.3963e-06	1492	1493	3.80305e-05	1746	2499	2500	8.80008e-05	4544	4545	0.000107916	1692	1693	3.94579e-05	16	17	4.76448e-07	59	60	1.30394e-06	458	459	1.07011e-05	8	9	2.36546e-07
IFRLAFRM	ATATTTCGACTCGCTTTTCGTATG	Pool 13	8277	8278	0.00020344	3900	3901	7.82972e-05	1067	1068	2.36796e-05	18018	18019	0.000358712	5885	5886	0.000149931	3282	6433	6434	0.000226479	8799	8800	0.000208945	156	157	3.65912e-06	7370	7371	0.000206582	3969	3970	8.62774e-05	10508	10509	0.000245006	5575	5576	0.000146553
IFSAHPTL	ATATTTTCAGCACACCCGACGTTG	Pool 13	2000	2001	4.91765e-05	271	272	5.45933e-06	4	5	1.1086e-07	NA	1	1.99074e-08	1074	1075	2.73829e-05	1430	1819	1820	6.40646e-05	1887	1888	4.48283e-05	2	3	6.99196e-08	447	448	1.25558e-05	3	4	8.69294e-08	167	168	3.91675e-06	98	99	2.602e-06
IFSFEVNV	ATCTTTTCGTTCGAGGTGAACGTG	Pool 13	2351	2352	5.78027e-05	2763	2764	5.54764e-05	7	8	1.77375e-07	6613	6614	0.000131668	627	628	1.59967e-05	1084.5	1338	1339	4.71332e-05	2172	2173	5.15953e-05	7	8	1.86452e-07	27	28	7.84738e-07	212	213	4.62899e-06	2122	2123	4.94955e-05	136	137	3.60075e-06
IFSFSAAV	ATATTTTCATTTTCCGCCGCCGTT	Pool 13	5776	5777	0.000141975	952	953	1.91277e-05	3944	3945	8.74683e-05	2512	2513	5.00274e-05	13005	13006	0.000331295	4228	3713	3714	0.000130734	6440	6441	0.000152934	710	711	1.65709e-05	5461	5462	0.00015308	2169	2170	4.71592e-05	3770	3771	8.7917e-05	4453	4454	0.000117064
IFSFVMNF	ATCTTCTCCTTTGTTATGAACTTC	Pool 13	17088	17089	0.000419979	2627	2628	5.27467e-05	1447	1448	3.2105e-05	5747	5748	0.000114428	62571	62572	0.00159387	4951	14031	14032	0.000493931	18328	18329	0.0004352	4789	4790	0.000111638	1411	1412	3.95732e-05	6531	6532	0.000141956	41388	41389	0.000964942	6848	6849	0.000180011
IFSKYGKI	ATATTTTCGAAATACGGCAAAATA	Pool 13	2021	2022	4.96926e-05	340	341	6.84423e-06	1784	1785	3.95769e-05	10676	10677	0.000212552	1238	1239	3.15604e-05	1561.5	1458	1459	5.13573e-05	2084	2085	4.95058e-05	431	432	1.00684e-05	6	7	1.96185e-07	1684	1685	3.6619e-05	4025	4026	9.3862e-05	105	106	2.78598e-06
IFSLFAPF	ATATTCTCTTTATTTGCTCCTTTC	Pool 13	51989	51990	0.0012777	25390	25391	0.000509624	53143	53144	0.0011783	24047	24048	0.000478734	41926	41927	0.00106799	4879	44963	44964	0.00158275	57160	57161	0.00135722	40554	40555	0.000945196	98051	98052	0.00274804	25725	25726	0.000559086	48568	48569	0.00113234	108337	108338	0.00284743
IFSYVLIL	ATATTCAGTTATGTTCTCATTTTG	Pool 13	21344	21345	0.000524574	4165	4166	8.3616e-05	290302	290303	0.00643658	9225	9226	0.000183666	28775	28776	0.000732997	4752	17319	17320	0.000609669	23747	23748	0.000563868	2608	2609	6.08067e-05	220017	220018	0.00616631	48801	48802	0.00106058	33405	33406	0.000778826	9898	9899	0.000260174
IFTFFLSL	ATATTTACTTTCTTCTTAAGTCTG	Pool 13	25134	25135	0.000617717	26198	26199	0.000525842	31623	31624	0.000701165	31652	31653	0.00063013	22428	22429	0.000571323	4630	21205	21206	0.000746458	27250	27251	0.000647042	19507	19508	0.000454664	8421	8422	0.000236038	11480	11481	0.000249509	19593	19594	0.000456814	13061	13062	0.000343307
IFTFNFTI	ATATTTACATTCAACTTCACCATC	Pool 13	7769	7770	0.000190955	101	102	2.04725e-06	4829	4830	0.00010709	3113	3114	6.19917e-05	2155	2156	5.49187e-05	2100	5572	5573	0.000196171	8764	8765	0.000208114	1921	1922	4.47951e-05	3277	3278	9.18704e-05	1434	1435	3.11859e-05	3404	3405	7.93841e-05	9348	9349	0.000245718
IFTSFLLL	ATATTTACTTCCTTCTTACTATTA	Pool 13	29617	29618	0.000727891	38778	38779	0.000778336	16475	16476	0.000365305	40186	40187	0.00080002	29906	29907	0.000761806	4765.5	24942	24943	0.000878001	31908	31909	0.000757641	27798	27799	0.000647898	33086	33087	0.000927308	44822	44823	0.000974109	12628	12629	0.000294432	19429	19430	0.000510676
IFVFNHCL	ATCTTCGTCTTCAACCATTGTCTC	Pool 13	18217	18218	0.000447725	18052	18053	0.000362343	14907	14908	0.000330539	53744	53745	0.00106992	11783	11784	0.000300168	4144	13139	13140	0.000462532	17987	17988	0.000427104	76103	76104	0.00177372	1870	1871	5.24373e-05	2688	2689	5.84383e-05	14597	14598	0.000340337	22244	22245	0.000584662
IFVFYCVM	ATATTTGTATTCTACTGCGTTATG	Pool 13	4398	4399	0.00010811	1803	1804	3.62082e-05	4435	4436	9.83547e-05	5232	5233	0.000104176	502	503	1.28127e-05	955.5	3715	3716	0.000130804	4765	4766	0.000113163	4	5	1.16533e-07	7528	7529	0.000211011	781	782	1.69947e-05	3340	3341	7.7892e-05	901	902	2.37071e-05
IFVMFLTI	ATATTTGTGATGTTCCTCACGATT	Pool 13	5852	5853	0.000143843	3747	3748	7.52263e-05	1603	1604	3.55638e-05	13611	13612	0.00027098	2754	2755	7.01768e-05	2378	4158	4159	0.000146398	6609	6610	0.000156947	1119	1120	2.61033e-05	304	305	8.54804e-06	2021	2022	4.39428e-05	4134	4135	9.64032e-05	16079	16080	0.000422628
IFWYKGAI	ATATTCTGGTACAAAGGTGCGATT	Pool 13	NA	1	2.4576e-08	NA	1	2.00711e-08	NA	1	2.21719e-08	NA	1	1.99074e-08	NA	1	2.54725e-08	64	NA	1	3.52003e-08	NA	1	2.37438e-08	NA	1	2.33065e-08	NA	1	2.80264e-08	NA	1	2.17323e-08	NA	1	2.3314e-08	NA	1	2.62828e-08
IFYFIQKI	ATTTTCTACTTCATACAGAAGATT	Pool 13	5287	5288	0.000129958	2028	2029	4.07242e-05	2645	2646	5.86669e-05	203	204	4.06111e-06	882	883	2.24922e-05	1286	3631	3632	0.000127848	5264	5265	0.000125011	3243	3244	7.56064e-05	867	868	2.43269e-05	4211	4212	9.15366e-05	13998	13999	0.000326372	1295	1296	3.40626e-05
IFYFVSYI	ATCTTTTACTTCGTGTCGTACATA	Pool 13	7913	7914	0.000194494	2134	2135	4.28517e-05	778	779	1.72719e-05	228497	228498	0.00454881	1832	1833	4.66911e-05	1943	6491	6492	0.00022852	7692	7693	0.000182661	10997	10998	0.000256325	5571	5572	0.000156163	586	587	1.27569e-05	3212	3213	7.49078e-05	3656	3657	9.61164e-05
IGDLFPAL	ATCGGGGACCTATTCCCCGCCTTG	Pool 13	3708	3709	9.11522e-05	2729	2730	5.4794e-05	5640	5641	0.000125072	733	734	1.4612e-05	3792	3793	9.66172e-05	2735	3037	3038	0.000106939	4082	4083	9.69459e-05	9844	9845	0.000229453	988	989	2.77181e-05	8454	8455	0.000183747	130	131	3.05413e-06	2451	2452	6.44455e-05
IGFFKQKL	ATAGGTTTCTTCAAGCAAAAGTTG	Pool 13	3428	3429	8.4271e-05	112	113	2.26803e-06	13896	13897	0.000308123	118	119	2.36898e-06	783	784	1.99704e-05	1215	2425	2426	8.5396e-05	3450	3451	8.19399e-05	4475	4476	0.00010432	78	79	2.21408e-06	3065	3066	6.66314e-05	2829	2830	6.59785e-05	287	288	7.56946e-06
IGFGAMFL	ATCGGTTTCGGTGCCATGTTCCTC	Pool 13	2628	2629	6.46102e-05	15150	15151	0.000304097	2669	2670	5.9199e-05	1923	1924	3.83019e-05	2842	2843	7.24183e-05	2408	1595	1596	5.61797e-05	2941	2942	6.98543e-05	777	778	1.81325e-05	967	968	2.71295e-05	703	704	1.52996e-05	2446	2447	5.70493e-05	42	43	1.13016e-06
IGFIPPKL	ATAGGATTTATCCCTCCTAAGCTG	Pool 13	16388	16389	0.000402775	3057	3058	6.13773e-05	28211	28212	0.000625514	6554	6555	0.000130493	8339	8340	0.000212441	3736	9639	9640	0.000339331	16952	16953	0.000402529	24950	24951	0.000581521	1269	1270	3.55935e-05	15239	15240	0.000331201	8480	8481	0.000197726	29106	29107	0.000765015
IGFLTLIL	ATTGGCTTCCTGACACTTATCCTC	Pool 13	9729	9730	0.000239124	1048	1049	2.10545e-05	746	747	1.65624e-05	6727	6728	0.000133937	5850	5851	0.00014904	3276.5	6907	6908	0.000243164	10652	10653	0.000252943	16553	16554	0.000385816	72024	72025	0.0020186	11323	11324	0.000246097	8577	8578	0.000199987	7025	7026	0.000184663
IGFLYIQA	ATAGGATTCCTGTACATCCAGGCC	Pool 13	3622	3623	8.90387e-05	328	329	6.60338e-06	133	134	2.97104e-06	4857	4858	9.67103e-05	587	588	1.49778e-05	1048	2641	2642	9.29992e-05	4187	4188	9.9439e-05	569	570	1.32847e-05	618	619	1.73483e-05	3667	3668	7.97142e-05	7	8	1.86512e-07	1627	1628	4.27885e-05
IGFNPGHV	ATCGGGTTTAACCCAGGACACGTT	Pool 13	832	833	2.04718e-05	NA	1	2.00711e-08	NA	1	2.21719e-08	424	425	8.46066e-06	4233	4234	0.000107851	2862	569	570	2.00642e-05	1209	1210	2.873e-05	NA	1	2.33065e-08	2	3	8.40791e-08	270	271	5.88946e-06	NA	1	2.3314e-08	21	22	5.78223e-07
IGFPAPPV	ATAGGATTCCCCGCTCCGCCGGTC	Pool 13	370	371	9.11768e-06	108	109	2.18775e-06	106	107	2.3724e-06	814	815	1.62246e-05	127	128	3.26048e-06	514.5	162	163	5.73765e-06	570	571	1.35577e-05	NA	1	2.33065e-08	286	287	8.04357e-06	5988	5989	0.000130155	241	242	5.64198e-06	211	212	5.57196e-06
IGFSYSLG	ATCGGATTCTCGTATTCGCTAGGA	Pool 13	740	741	1.82108e-05	315	316	6.34245e-06	NA	1	2.21719e-08	5318	5319	0.000105888	138	139	3.54068e-06	527.5	612	613	2.15778e-05	1093	1094	2.59757e-05	516	517	1.20495e-05	2	3	8.40791e-08	805	806	1.75163e-05	963	964	2.24747e-05	20	21	5.5194e-07
IGFTSTTI	ATAGGGTTCACCTCCACAACCATA	Pool 13	9876	9877	0.000242737	591	592	1.18821e-05	8182	8183	0.000181433	22805	22806	0.000454009	2136	2137	5.44348e-05	2089	5748	5749	0.000202367	10380	10381	0.000246484	3912	3913	9.11984e-05	3466	3467	9.71674e-05	606	607	1.31915e-05	19	20	4.66279e-07	19754	19755	0.000519218
IGFYINEV	ATCGGATTTTACATAAATGAAGTC	Pool 13	18767	18768	0.000461242	7296	7297	0.000146459	35842	35843	0.000794708	72295	72296	0.00143923	7405	7406	0.000188649	3609	14168	14169	0.000498753	19576	19577	0.000464832	15529	15530	0.00036195	276	277	7.7633e-06	23740	23741	0.000515948	16680	16681	0.0003889	10837	10838	0.000284853
IGGVLFSL	ATCGGTGGGGTTCTCTTCTCCTTG	Pool 13	7888	7889	0.00019388	1444	1445	2.90027e-05	3301	3302	7.32117e-05	12205	12206	0.00024299	4600	4601	0.000117199	2976	6620	6621	0.000233061	7889	7890	0.000187339	1003	1004	2.33998e-05	241	242	6.78238e-06	3248	3249	7.06084e-05	1820	1821	4.24547e-05	4796	4797	0.000126079
IGIAMAVL	ATAGGAATCGCTATGGCGGTTCTC	Pool 13	2678	2679	6.5839e-05	609	610	1.22433e-05	233	234	5.18823e-06	741	742	1.47713e-05	15702	15703	0.000399995	4381	1330	1331	4.68516e-05	2061	2062	4.89597e-05	7	8	1.86452e-07	318	319	8.94041e-06	9	10	2.17323e-07	58	59	1.37552e-06	685	686	1.803e-05
IGILIASL	ATTGGGATTCTTATCGCAAGTCTA	Pool 13	15431	15432	0.000379256	578	579	1.16211e-05	5475	5476	0.000121413	4934	4935	9.82431e-05	11101	11102	0.000282796	4078	9838	9839	0.000346336	13876	13877	0.000329493	7809	7810	0.000182024	1177	1178	3.30151e-05	2498	2499	5.43091e-05	2107	2108	4.91458e-05	12635	12636	0.00033211
IGILLGFI	ATAGGGATCCTTTTAGGATTCATC	Pool 13	11532	11533	0.000283435	1815	1816	3.6449e-05	5957	5958	0.0001321	2137	2138	4.25621e-05	8369	8370	0.000213205	3744	8251	8252	0.000290473	11524	11525	0.000273647	9188	9189	0.000214164	2829	2830	7.93146e-05	7747	7748	0.000168382	2510	2511	5.85414e-05	6790	6791	0.000178487
IGILLGLI	ATCGGTATTCTCCTTGGGCTGATA	Pool 13	5679	5680	0.000139591	169	170	3.41208e-06	3381	3382	7.49855e-05	954	955	1.90116e-05	7532	7533	0.000191884	3633	2952	2953	0.000103947	6801	6802	0.000161505	4199	4200	9.78874e-05	1400	1401	3.92649e-05	4189	4190	9.10585e-05	648	649	1.51308e-05	1786	1787	4.69674e-05
IGILYMVL	ATCGGCATACTTTACATGGTGTTG	Pool 13	1673	1674	4.11402e-05	3	4	8.02842e-08	9	10	2.21719e-07	1363	1364	2.71537e-05	151	152	3.87182e-06	551	1211	1212	4.26628e-05	2114	2115	5.02181e-05	870	871	2.03e-05	6	7	1.96185e-07	310	311	6.75876e-06	NA	1	2.3314e-08	8	9	2.36546e-07
IGIPLFFL	ATTGGTATTCCGCTCTTCTTTCTA	Pool 13	31010	31011	0.000762125	22753	22754	0.000456697	24140	24141	0.000535253	48866	48867	0.000972816	30359	30360	0.000773345	4777	27185	27186	0.000956956	37150	37151	0.000882106	16235	16236	0.000378405	4405	4406	0.000123484	13267	13268	0.000288345	63200	63201	0.00147347	43385	43386	0.00114031
IGIRLNEL	ATTGGGATCAGGCTTAATGAGCTC	Pool 13	7859	7860	0.000193167	1838	1839	3.69107e-05	25372	25373	0.000562568	695	696	1.38556e-05	658	659	1.67864e-05	1111	5172	5173	0.000182091	8402	8403	0.000199519	1637	1638	3.81761e-05	2458	2459	6.89168e-05	2962	2963	6.43929e-05	112	113	2.63448e-06	3486	3487	9.16483e-05
IGIYHVLM	ATCGGGATTTACCACGTCCTCATG	Pool 13	5553	5554	0.000136495	256	257	5.15826e-06	3492	3493	7.74465e-05	3672	3673	7.312e-05	737	738	1.87987e-05	1165.5	4645	4646	0.000163541	6597	6598	0.000156662	128570	128571	0.00299654	43	44	1.23316e-06	4538	4539	9.86431e-05	661	662	1.54338e-05	2677	2678	7.03855e-05
IGKIFSNI	ATCGGCAAAATATTTTCAAATATC	Pool 13	2869	2870	7.0533e-05	1109	1110	2.22789e-05	821	822	1.82253e-05	486	487	9.69492e-06	219	220	5.60395e-06	636	1486	1487	5.23429e-05	2822	2823	6.70288e-05	212	213	4.96429e-06	13	14	3.92369e-07	98	99	2.1515e-06	8912	8913	0.000207797	23	24	6.30788e-07
IGKIQANL	ATAGGGAAGATTCAGGCGAATCTA	Pool 13	5141	5142	0.00012637	125	126	2.52895e-06	4090	4091	9.07054e-05	2578	2579	5.13412e-05	5156	5157	0.000131362	3105.5	3502	3503	0.000123307	5525	5526	0.000131208	NA	1	2.33065e-08	332	333	9.33278e-06	6349	6350	0.000138	1973	1974	4.60218e-05	385	386	1.01452e-05
IGKRFGPF	ATTGGTAAACGATTTGGACCCTTC	Pool 13	5783	5784	0.000142147	220	221	4.4357e-06	602	603	1.33697e-05	4717	4718	9.39232e-05	6114	6115	0.000155764	3332.5	4222	4223	0.000148651	6469	6470	0.000153622	2716	2717	6.33238e-05	95	96	2.69053e-06	680	681	1.47997e-05	82	83	1.93506e-06	12216	12217	0.000321098
IGLGSAPL	ATCGGTCTAGGGTCCGCACCCCTA	Pool 13	1581	1582	3.88792e-05	2	3	6.02132e-08	2355	2356	5.22371e-05	79	80	1.59259e-06	34	35	8.91538e-07	324	1203	1204	4.23812e-05	1496	1497	3.55445e-05	3	4	9.32261e-08	5	6	1.68158e-07	NA	1	2.17323e-08	1	2	4.66279e-08	337	338	8.8836e-06
IGLHGLGL	ATTGGGCTCCACGGCCTTGGGCTG	Pool 13	308	309	7.59397e-06	38	39	7.82771e-07	94	95	2.10633e-06	173	174	3.46389e-06	1656	1657	4.22079e-05	1836.5	117	118	4.15364e-06	274	275	6.52955e-06	NA	1	2.33065e-08	1	2	5.60527e-08	134	135	2.93387e-06	NA	1	2.3314e-08	2	3	7.88485e-08
IGLPYVEI	ATTGGTTTACCCTACGTGGAGATC	Pool 13	1120	1121	2.75497e-05	NA	1	2.00711e-08	38	39	8.64705e-07	261	262	5.21575e-06	3722	3723	9.48342e-05	2711	870	871	3.06595e-05	1347	1348	3.20066e-05	2	3	6.99196e-08	2	3	8.40791e-08	2	3	6.5197e-08	NA	1	2.3314e-08	32	33	8.67334e-07
IGLRISPL	ATTGGTTTACGTATCTCGCCTCTA	Pool 13	8784	8785	0.0002159	684	685	1.37487e-05	3564	3565	7.90429e-05	818	819	1.63042e-05	10767	10768	0.000274288	4038	6965	6966	0.000245205	7879	7880	0.000187101	4508	4509	0.000105089	1413	1414	3.96293e-05	7229	7230	0.000157125	14503	14504	0.000338146	12165	12166	0.000319757
IGLWSAFM	ATAGGACTTTGGAGTGCCTTTATG	Pool 13	1268	1269	3.11869e-05	291	292	5.86075e-06	1733	1734	3.84461e-05	624	625	1.24421e-05	332	333	8.48235e-06	778	1362	1363	4.7978e-05	1584	1585	3.76339e-05	2	3	6.99196e-08	6	7	1.96185e-07	866	867	1.88419e-05	241	242	5.64198e-06	1073	1074	2.82278e-05
IGLYFAWL	ATAGGTCTATATTTTGCGTGGTTA	Pool 13	6309	6310	0.000155074	41576	41577	0.000834494	2906	2907	6.44538e-05	2778	2779	5.53227e-05	6847	6848	0.000174436	3489	4152	4153	0.000146187	6158	6159	0.000146238	194	195	4.54477e-06	126	127	3.55935e-06	6169	6170	0.000134089	174	175	4.07994e-06	3174	3175	8.3448e-05
IGMKYRSV	ATAGGTATGAAGTACCGCTCAGTC	Pool 13	1905	1906	4.68418e-05	1053	1054	2.11549e-05	315	316	7.00633e-06	504	505	1.00532e-05	573	574	1.46212e-05	1031	1840	1841	6.48038e-05	2184	2185	5.18802e-05	160	161	3.75235e-06	371	372	1.04258e-05	1258	1259	2.7361e-05	158	159	3.70692e-06	370	371	9.75094e-06
IGMLLFTI	ATTGGCATGCTTTTGTTTACAATT	Pool 13	14638	14639	0.000359768	900	901	1.8084e-05	18617	18618	0.000412797	49565	49566	0.000986731	7621	7622	0.000194151	3640	8978	8979	0.000316064	14874	14875	0.000353189	5717	5718	0.000133267	1452	1453	4.07223e-05	9341	9342	0.000203024	27758	27759	0.000647172	2501	2502	6.57597e-05
IGMLNNPM	ATAGGAATGCTAAATAATCCAATG	Pool 13	9408	9409	0.000231235	16970	16971	0.000340626	4164	4165	9.23461e-05	9252	9253	0.000184203	4943	4944	0.000125936	3057	6928	6929	0.000243903	10341	10342	0.000245558	5050	5051	0.000117721	2904	2905	8.14166e-05	39416	39417	0.000856624	22	23	5.36221e-07	5558	5559	0.000146106
IGPEYKNI	ATTGGGCCTGAATACAAGAACATA	Pool 13	3066	3067	7.53745e-05	2089	2090	4.19485e-05	17449	17450	0.0003869	1924	1925	3.83218e-05	404	405	1.03164e-05	850.5	1713	1714	6.03333e-05	3585	3586	8.51453e-05	8	9	2.09759e-07	162	163	4.5683e-06	431	432	9.38837e-06	70	71	1.65529e-06	310	311	8.17397e-06
IGQKFSSL	ATCGGCCAAAAGTTCTCGAGTTTA	Pool 13	2204	2205	5.419e-05	594	595	1.19423e-05	25047	25048	0.000555362	899	900	1.79167e-05	106	107	2.72556e-06	486	1523	1524	5.36453e-05	2086	2087	4.95533e-05	1400	1401	3.26524e-05	1719	1720	4.82054e-05	817	818	1.77771e-05	6	7	1.63198e-07	6671	6672	0.000175359
IGQQFAQM	ATCGGTCAACAGTTCGCTCAAATG	Pool 13	7114	7115	0.000174858	2515	2516	5.04988e-05	382	383	8.49185e-06	9678	9679	0.000192684	2450	2451	6.24331e-05	2242	4069	4070	0.000143265	8046	8047	0.000191066	3787	3788	8.82851e-05	43	44	1.23316e-06	2403	2404	5.22445e-05	10590	10591	0.000246918	16597	16598	0.000436243
IGQRLLTL	ATCGGTCAGCGACTATTGACCCTG	Pool 13	9386	9387	0.000230695	6917	6918	0.000138852	5506	5507	0.000122101	3571	3572	7.11093e-05	4992	4993	0.000127184	3068	5839	5840	0.00020557	8970	8971	0.000213006	5345	5346	0.000124597	12772	12773	0.000357981	8991	8992	0.000195417	16885	16886	0.00039368	626	627	1.64793e-05
IGRAIPNL	ATTGGTCGAGCTATACCGAATCTG	Pool 13	2460	2461	6.04814e-05	462	463	9.2929e-06	5635	5636	0.000124961	823	824	1.64037e-05	1280	1281	3.26303e-05	1589	1448	1449	5.10053e-05	2372	2373	5.6344e-05	3482	3483	8.11766e-05	12	13	3.64343e-07	251	252	5.47655e-06	192	193	4.4996e-06	42	43	1.13016e-06
IGRAVMYL	ATCGGCCGCGCCGTAATGTACTTA	Pool 13	501	502	1.23371e-05	342	343	6.88437e-06	869	870	1.92896e-05	113	114	2.26945e-06	NA	1	2.54725e-08	64	452	453	1.59457e-05	502	503	1.19431e-05	NA	1	2.33065e-08	4	5	1.40132e-07	189	190	4.12914e-06	324	325	7.57704e-06	47	48	1.26158e-06
IGSTYQHL	ATCGGTTCTACCTATCAGCATCTG	Pool 13	6488	6489	0.000159473	544	545	1.09387e-05	11487	11488	0.000254711	4406	4407	8.7732e-05	10535	10536	0.000268378	4015	4275	4276	0.000150517	6953	6954	0.000165114	234	235	5.47703e-06	1619	1620	4.54027e-05	4922	4923	0.000106988	1671	1672	3.8981e-05	1368	1369	3.59812e-05
IGTFSMNL	ATTGGAACATTCTCCATGAATCTA	Pool 13	6884	6885	0.000169206	69	70	1.40497e-06	1573	1574	3.48986e-05	2353	2354	4.68621e-05	11040	11041	0.000281242	4073	4929	4930	0.000173538	7032	7033	0.00016699	25308	25309	0.000589865	653	654	1.83292e-05	9115	9116	0.000198112	1399	1400	3.26396e-05	1836	1837	4.82816e-05
IGTVFEVL	ATAGGGACCGTGTTCGAGGTGCTT	Pool 13	3010	3011	7.39982e-05	604	605	1.2143e-05	1296	1297	2.8757e-05	478	479	9.53566e-06	73	74	1.88497e-06	425	2114	2115	7.44487e-05	3422	3423	8.1275e-05	12	13	3.02985e-07	18061	18062	0.000506212	1518	1519	3.30114e-05	356	357	8.32309e-06	1255	1256	3.30113e-05
IGVFNASV	ATCGGGGTCTTCAACGCATCCGTC	Pool 13	2580	2581	6.34306e-05	245	246	4.93748e-06	4	5	1.1086e-07	394	395	7.86343e-06	603	604	1.53854e-05	1062.5	1416	1417	4.98788e-05	2451	2452	5.82198e-05	2	3	6.99196e-08	2	3	8.40791e-08	76	77	1.67339e-06	13638	13639	0.000317979	1973	1974	5.18823e-05
IGVFSPSL	ATAGGAGTCTTCTCGCCAAGCCTT	Pool 13	9939	9940	0.000244285	227	228	4.5762e-06	7152	7153	0.000158596	2238	2239	4.45727e-05	8444	8445	0.000215115	3752	6529	6530	0.000229858	9518	9519	0.000226017	14690	14691	0.000342396	29	30	8.40791e-07	2579	2580	5.60694e-05	8306	8307	0.000193669	5992	5993	0.000157513
IGWGFPAV	ATAGGGTGGGGATTCCCCGCAGTT	Pool 13	2328	2329	5.72374e-05	2	3	6.02132e-08	103	104	2.30588e-06	85	86	1.71204e-06	1387	1388	3.53558e-05	1679	1905	1906	6.70918e-05	2673	2674	6.34909e-05	221	222	5.17405e-06	2	3	8.40791e-08	134	135	2.93387e-06	57	58	1.35221e-06	159	160	4.20526e-06
IGYASSSL	ATTGGGTACGCGTCTAGTTCTTTA	Pool 13	10238	10239	0.000251633	1607	1608	3.22743e-05	41347	41348	0.000916765	7305	7306	0.000145444	11338	11339	0.000288833	4100	8373	8374	0.000294767	10981	10982	0.000260754	2624	2625	6.11796e-05	301	302	8.46396e-06	1602	1603	3.48369e-05	4532	4533	0.000105682	8390	8391	0.000220539
IGYDIYNI	ATCGGGTATGATATCTATAATATA	Pool 13	9193	9194	0.000225951	13814	13815	0.000277282	8934	8935	0.000198106	7508	7509	0.000149485	12945	12946	0.000329767	4224	7280	7281	0.000256293	9790	9791	0.000232476	11400	11401	0.000265718	59743	59744	0.00167441	7798	7799	0.000169491	19017	19018	0.000443385	7913	7914	0.000208002
IGYFSLFL	ATTGGGTACTTCTCTCTATTTCTG	Pool 13	8137	8138	0.000199999	584	585	1.17416e-05	11238	11239	0.00024919	4349	4350	8.65973e-05	3013	3014	7.67741e-05	2467	6760	6761	0.000237989	8761	8762	0.000208043	2859	2860	6.66567e-05	5811	5812	0.000162889	11604	11605	0.000252204	7856	7857	0.000183178	7389	7390	0.00019423
IGYQVTAM	ATAGGCTATCAGGTTACCGCGATG	Pool 13	578	579	1.42295e-05	3703	3704	7.43432e-05	197	198	4.39004e-06	NA	1	1.99074e-08	93	94	2.39442e-06	465.5	332	333	1.17217e-05	434	435	1.03286e-05	NA	1	2.33065e-08	3	4	1.12105e-07	126	127	2.76001e-06	13	14	3.26396e-07	6	7	1.8398e-07
IGYVYRLP	ATTGGGTACGTCTACCGACTTCCA	Pool 13	5817	5818	0.000142983	74	75	1.50533e-06	4065	4066	9.01511e-05	1025	1026	2.0425e-05	1035	1036	2.63895e-05	1397.5	3608	3609	0.000127038	5973	5974	0.000141845	3896	3897	9.08255e-05	2089	2090	5.85751e-05	699	700	1.52126e-05	2138	2139	4.98686e-05	120	121	3.18022e-06
IHFFYLSV	ATTCACTTCTTCTACTTATCCGTT	Pool 13	32048	32049	0.000787635	8969	8970	0.000180037	19387	19388	0.000429869	17813	17814	0.000354631	27714	27715	0.000705971	4734	23776	23777	0.000836958	33612	33613	0.0007981	22276	22277	0.000519199	6769	6770	0.000189739	24926	24927	0.000541722	34647	34648	0.000807782	24819	24820	0.00065234
IHFVRVLF	ATACACTTTGTAAGAGTACTATTT	Pool 13	4867	4868	0.000119636	362	363	7.28579e-06	5877	5878	0.000130327	511	512	1.01926e-05	2164	2165	5.5148e-05	2103	3291	3292	0.000115879	4565	4566	0.000108414	1248	1249	2.91099e-05	79	80	2.24211e-06	10199	10200	0.00022167	3345	3346	7.80085e-05	856	857	2.25244e-05
IHHFYCDV	ATACATCACTTTTATTGTGATGTG	Pool 13	3861	3862	9.49124e-05	164	165	3.31172e-06	3985	3986	8.83773e-05	315	316	6.29075e-06	7040	7041	0.000179352	3540	2481	2482	8.73672e-05	3425	3426	8.13463e-05	91	92	2.1442e-06	5	6	1.68158e-07	883	884	1.92114e-05	440	441	1.02815e-05	7788	7789	0.000204717
IHMLFCAL	ATACATATGCTGTTTTGCGCTCTG	Pool 13	4317	4318	0.000106119	3	4	8.02842e-08	778	779	1.72719e-05	52	53	1.05509e-06	3276	3277	8.34734e-05	2570	2669	2670	9.39848e-05	4648	4649	0.000110385	4235	4236	9.87264e-05	19	20	5.60527e-07	3824	3825	8.31262e-05	48	49	1.14238e-06	1176	1177	3.09349e-05
IHMVELYL	ATACACATGGTTGAACTCTATCTA	Pool 13	3029	3030	7.44652e-05	1247	1248	2.50487e-05	2963	2964	6.57176e-05	53	54	1.075e-06	1476	1477	3.76229e-05	1733	2022	2023	7.12102e-05	3245	3246	7.70724e-05	109	110	2.56372e-06	437	438	1.22755e-05	2773	2774	6.02855e-05	1384	1385	3.22898e-05	732	733	1.92653e-05
IHNFSPLL	ATCCACAATTTCTCTCCGTTACTA	Pool 13	8236	8237	0.000202432	603	604	1.21229e-05	70330	70331	0.00155937	7442	7443	0.000148171	238	239	6.08793e-06	658	5975	5976	0.000210357	8031	8032	0.00019071	1609	1610	3.75235e-05	46499	46500	0.00130323	1714	1715	3.7271e-05	158	159	3.70692e-06	16460	16461	0.000432642
IHYFRKEL	ATACATTATTTCCGGAAGGAGTTA	Pool 13	8716	8717	0.000214229	7420	7421	0.000148947	6518	6519	0.000144539	12044	12045	0.000239785	1612	1613	4.10872e-05	1815	6240	6241	0.000219685	8847	8848	0.000210085	7907	7908	0.000184308	49809	49810	0.00139599	1983	1984	4.3117e-05	450	451	1.05146e-05	5366	5367	0.00014106
IHYHLQLI	ATCCATTATCATCTACAGTTGATC	Pool 13	NA	1	2.4576e-08	NA	1	2.00711e-08	NA	1	2.21719e-08	NA	1	1.99074e-08	NA	1	2.54725e-08	64	NA	1	3.52003e-08	NA	1	2.37438e-08	NA	1	2.33065e-08	NA	1	2.80264e-08	NA	1	2.17323e-08	NA	1	2.3314e-08	NA	1	2.62828e-08
IHYRLRLV	ATCCATTACCGTCTGAGACTGGTC	Pool 13	3809	3810	9.36344e-05	1507	1508	3.02672e-05	180	181	4.01312e-06	5062	5063	0.000100791	11519	11520	0.000293443	4118	2787	2788	9.81385e-05	4707	4708	0.000111786	214	215	5.0109e-06	13	14	3.92369e-07	106	107	2.32536e-06	1562	1563	3.64397e-05	3078	3079	8.09249e-05
IIADFTGV	ATAATTGCTGATTTCACTGGAGTC	Pool 13	NA	1	2.4576e-08	NA	1	2.00711e-08	NA	1	2.21719e-08	NA	1	1.99074e-08	NA	1	2.54725e-08	64	NA	1	3.52003e-08	NA	1	2.37438e-08	NA	1	2.33065e-08	NA	1	2.80264e-08	NA	1	2.17323e-08	NA	1	2.3314e-08	NA	1	2.62828e-08
IIASYAFI	ATTATTGCTAGTTACGCGTTTATT	Pool 13	30083	30084	0.000739343	9689	9690	0.000194489	13163	13164	0.000291871	12701	12702	0.000252864	11209	11210	0.000285547	4085	23308	23309	0.000820484	31538	31539	0.000748856	43288	43289	0.00100892	10708	10709	0.000300134	36529	36530	0.000793882	24390	24391	0.000568651	22680	22681	0.000596121
IICSFRRI	ATTATATGTTCGTTCCGTCGAATA	Pool 13	14142	14143	0.000347578	3296	3297	6.61743e-05	12424	12425	0.000275486	20885	20886	0.000415786	34132	34133	0.000869453	4829	9802	9803	0.000345069	13950	13951	0.00033125	13821	13822	0.000322143	608	609	1.70681e-05	5732	5733	0.000124592	1266	1267	2.95388e-05	24149	24150	0.000634731
IIFAFWVV	ATAATCTTTGCATTTTGGGTGGTT	Pool 13	18569	18570	0.000456376	4190	4191	8.41178e-05	9851	9852	0.000218438	9248	9249	0.000184124	11176	11177	0.000284706	4083	14443	14444	0.000508433	18301	18302	0.000434559	2573	2574	5.9991e-05	998	999	2.79983e-05	2170	2171	4.71809e-05	23778	23779	0.000554383	14915	14916	0.000392035
IIFHAFFI	ATCATATTTCACGCCTTCTTCATT	Pool 13	11426	11427	0.00028083	7582	7583	0.000152199	6388	6389	0.000141656	9843	9844	0.000195969	7057	7058	0.000179785	3548	9032	9033	0.000317964	11627	11628	0.000276093	10401	10402	0.000242434	3990	3991	0.000111853	2105	2106	4.57683e-05	5272	5273	0.000122935	18784	18785	0.000493723
IIFISLVL	ATAATATTCATTTCACTGGTCCTC	Pool 13	22952	22953	0.000564092	25210	25211	0.000506011	33548	33549	0.000743846	16986	16987	0.000338167	26314	26315	0.000670309	4716	15916	15917	0.000560283	22874	22875	0.000543139	33932	33933	0.00079086	3131	3132	8.77786e-05	9898	9899	0.000215128	49525	49526	0.00115465	7383	7384	0.000194073
IIFLLIYI	ATAATCTTTCTACTTATTTATATC	Pool 13	36260	36261	0.000891149	50674	50675	0.0010171	19204	19205	0.000425812	27824	27825	0.000553924	31153	31154	0.000793571	4789	32405	32406	0.0011407	36943	36944	0.000877191	22287	22288	0.000519456	18276	18277	0.000512238	14954	14955	0.000325007	24338	24339	0.000567439	50830	50831	0.00133598
IIFLTTLF	ATAATCTTTCTAACGACTTTGTTT	Pool 13	7971	7972	0.00019592	3498	3499	7.02286e-05	25678	25679	0.000569353	1351	1352	2.69148e-05	2035	2036	5.1862e-05	2038	6890	6891	0.000242565	8696	8697	0.0002065	7895	7896	0.000184028	6150	6151	0.00017239	14845	14846	0.000322638	44739	44740	0.00104307	5600	5601	0.00014721
IIFLVQLM	ATTATCTTCCTTGTTCAACTAATG	Pool 13	7363	7364	0.000180977	43340	43341	0.0008699	4332	4333	9.6071e-05	4638	4639	9.23505e-05	13237	13238	0.000337205	4246	6327	6328	0.000222748	8067	8068	0.000191565	13184	13185	0.000307297	6205	6206	0.000173932	36806	36807	0.000799902	11318	11319	0.000263891	5359	5360	0.000140876
IIFRQESF	ATAATTTTCCGCCAGGAATCTTTT	Pool 13	3712	3713	9.12506e-05	2536	2537	5.09203e-05	4839	4840	0.000107312	1497	1498	2.98213e-05	772	773	1.96902e-05	1204	2584	2585	9.09928e-05	3935	3936	9.34556e-05	312	313	7.29494e-06	5247	5248	0.000147082	16138	16139	0.000350738	819	820	1.91175e-05	2446	2447	6.43141e-05
IIFSIISL	ATCATCTTCTCTATTATATCTCTA	Pool 13	28068	28069	0.000689823	23401	23402	0.000469703	26904	26905	0.000596536	26884	26885	0.000535211	18836	18837	0.000479826	4518	23702	23703	0.000834353	29495	29496	0.000700347	363688	363689	0.00847633	47645	47646	0.00133534	21984	21985	0.000477786	94570	94571	0.00220483	49995	49996	0.00131404
IIFSNGEL	ATTATATTTTCCAACGGCGAGTTG	Pool 13	5399	5400	0.00013271	5887	5888	0.000118178	7709	7710	0.000170946	2322	2323	4.62449e-05	2905	2906	7.40231e-05	2428	4138	4139	0.000145694	5725	5726	0.000135957	5145	5146	0.000119935	401	402	1.12666e-05	2528	2529	5.49611e-05	2955	2956	6.89161e-05	3412	3413	8.97034e-05
IIFSYTRI	ATAATCTTTTCTTACACGCGGATT	Pool 13	8649	8650	0.000212582	2669	2670	5.35897e-05	10904	10905	0.000241785	6611	6612	0.000131628	4608	4609	0.000117403	2979	5290	5291	0.000186245	8913	8914	0.000211652	8155	8156	0.000190088	1635	1636	4.58511e-05	8862	8863	0.000192614	28261	28262	0.000658899	2475	2476	6.50763e-05
IIFYRDGV	ATCATTTTCTACCGTGATGGCGTA	Pool 13	4919	4920	0.000120914	803	804	1.61371e-05	285	286	6.34117e-06	7464	7465	0.000148609	2015	2016	5.13526e-05	2033	2502	2503	8.81064e-05	4225	4226	0.000100341	2045	2046	4.76852e-05	3193	3194	8.95162e-05	1018	1019	2.21453e-05	4830	4831	0.00011263	1463	1464	3.84781e-05
IIHRHKPM	ATCATTCACCGCCATAAACCAATG	Pool 13	4888	4889	0.000120152	126	127	2.54902e-06	1004	1005	2.22828e-05	330	331	6.58936e-06	40057	40058	0.00102038	4867	3097	3098	0.000109051	5544	5545	0.000131659	296	297	6.92204e-06	32	33	9.2487e-07	589	590	1.28221e-05	2949	2950	6.87762e-05	1503	1504	3.95294e-05
IIHRYFDF	ATTATACATCGGTATTTTGACTTT	Pool 13	4421	4422	0.000108675	3279	3280	6.58331e-05	2758	2759	6.11723e-05	2883	2884	5.7413e-05	2333	2334	5.94528e-05	2175	3189	3190	0.000112289	4114	4115	9.77058e-05	1689	1690	3.9388e-05	11	12	3.36316e-07	11581	11582	0.000251704	3546	3547	8.26946e-05	786	787	2.06846e-05
IIILTGLL	ATAATAATCTTGACCGGATTACTT	Pool 13	5131	5132	0.000126124	12685	12686	0.000254621	10890	10891	0.000241474	852	853	1.6981e-05	651	652	1.66081e-05	1104.5	3336	3337	0.000117463	5084	5085	0.000120737	2054	2055	4.78949e-05	98	99	2.77461e-06	942	943	2.04936e-05	590	591	1.37786e-05	11929	11930	0.000313554
IIISHVRL	ATTATCATTTCGCACGTTCGTCTC	Pool 13	6779	6780	0.000166625	1982	1983	3.98009e-05	6930	6931	0.000153674	10547	10548	0.000209984	10226	10227	0.000260507	3984	5847	5848	0.000205851	7462	7463	0.0001772	592	593	1.38208e-05	2121	2122	5.9472e-05	4729	4730	0.000102794	4496	4497	0.000104843	2235	2236	5.87684e-05
IIKAFRNI	ATAATCAAGGCGTTTCGAAACATC	Pool 13	3650	3651	8.97268e-05	44	45	9.03198e-07	379	380	8.42533e-06	769	770	1.53287e-05	161	162	4.12655e-06	567	2191	2192	7.71591e-05	3777	3778	8.97041e-05	6	7	1.63146e-07	12	13	3.64343e-07	11957	11958	0.000259875	55	56	1.30558e-06	440	441	1.15907e-05
IIKTHLPL	ATTATTAAGACTCATTTACCGTTA	Pool 13	4604	4605	0.000113172	3262	3263	6.54919e-05	2628	2629	5.829e-05	356	357	7.10695e-06	1513	1514	3.85654e-05	1759	3497	3498	0.000123131	4652	4653	0.00011048	16	17	3.96211e-07	55	56	1.56948e-06	708	709	1.54082e-05	2743	2744	6.39735e-05	1789	1790	4.70463e-05
IILETIRL	ATAATTCTGGAAACCATTAGGCTC	Pool 13	4075	4076	0.000100172	34	35	7.02487e-07	456	457	1.01326e-05	2673	2674	5.32325e-05	1174	1175	2.99302e-05	1505	3315	3316	0.000116724	4694	4695	0.000111477	7525	7526	0.000175405	8086	8087	0.000226649	2229	2230	4.84631e-05	16712	16713	0.000389646	2127	2128	5.59299e-05
IILFYQKV	ATTATTTTGTTTTATCAGAAAGTG	Pool 13	7629	7630	0.000187515	2858	2859	5.73832e-05	3622	3623	8.03289e-05	3780	3781	7.527e-05	24910	24911	0.000634546	4697	6419	6420	0.000225986	7731	7732	0.000183587	2634	2635	6.14127e-05	281	282	7.90344e-06	6305	6306	0.000137044	3790	3791	8.83832e-05	20439	20440	0.000537221
IILGSYLL	ATTATATTGGGGTCCTACCTTCTA	Pool 13	5357	5358	0.000131678	2753	2754	5.52757e-05	806	807	1.78927e-05	4802	4803	9.56154e-05	1086	1087	2.76886e-05	1438	3260	3261	0.000114788	4917	4918	0.000116772	624	625	1.45666e-05	14365	14366	0.000402627	68439	68440	0.00148736	7201	7202	0.000167907	2847	2848	7.48535e-05
IILIFYSL	ATAATCTTGATATTCTACAGTCTA	Pool 13	9342	9343	0.000229613	712	713	1.43107e-05	1840	1841	4.08185e-05	1610	1611	3.20709e-05	27847	27848	0.000709358	4738	6713	6714	0.000236335	8937	8938	0.000212222	5302	5303	0.000123595	200	201	5.6333e-06	16215	16216	0.000352412	8995	8996	0.000209732	3244	3245	8.52878e-05
IILLFFVM	ATTATACTATTGTTCTTCGTGATG	Pool 13	39731	39732	0.000976452	69884	69885	0.00140267	47423	47424	0.00105148	32654	32655	0.000650077	21886	21887	0.000557517	4612	30483	30484	0.00107305	43102	43103	0.00102343	26184	26185	0.000610281	34758	34759	0.000974169	18842	18843	0.000409503	39893	39894	0.000930087	12197	12198	0.000320598
IILLLAYV	ATCATTTTATTATTAGCTTATGTC	Pool 13	11492	11493	0.000282452	370	371	7.44636e-06	5612	5613	0.000124451	4353	4354	8.66769e-05	9069	9070	0.000231036	3830	9059	9060	0.000318915	11723	11724	0.000278372	8277	8278	0.000192931	11887	11888	0.000333177	3928	3929	8.53864e-05	1773	1774	4.1359e-05	5242	5243	0.000137801
IILLNFCL	ATAATCCTCTTGAACTTTTGTTTA	Pool 13	17875	17876	0.00043932	12221	12222	0.000245308	23782	23783	0.000527315	11248	11249	0.000223939	3058	3059	7.79204e-05	2498	13538	13539	0.000476577	19192	19193	0.000455715	15260	15261	0.000355681	24393	24394	0.000683675	21138	21139	0.0004594	8830	8831	0.000205886	10547	10548	0.000277231
IILNFRTT	ATAATACTTAATTTTCGTACAACA	Pool 13	1880	1881	4.62274e-05	96	97	1.94689e-06	5	6	1.33032e-07	336	337	6.7088e-06	14	15	3.82088e-07	258	1486	1487	5.23429e-05	1788	1789	4.24777e-05	1199	1200	2.79678e-05	10	11	3.0829e-07	726	727	1.57994e-05	7255	7256	0.000169166	610	611	1.60588e-05
IILPPTRL	ATCATTCTCCCTCCCACGCGGCTG	Pool 13	195	196	4.81689e-06	1	2	4.01421e-08	NA	1	2.21719e-08	46	47	9.35649e-07	24	25	6.36813e-07	293	219	220	7.74407e-06	435	436	1.03523e-05	NA	1	2.33065e-08	NA	1	2.80264e-08	NA	1	2.17323e-08	NA	1	2.3314e-08	40	41	1.0776e-06
IILSLLPM	ATTATCCTATCTCTACTACCAATG	Pool 13	9379	9380	0.000230523	177	178	3.57265e-06	32988	32989	0.00073143	6226	6227	0.000123964	9267	9268	0.000236079	3863	6572	6573	0.000231372	10641	10642	0.000252682	24135	24136	0.000562526	2101	2102	5.89114e-05	3627	3628	7.88449e-05	6851	6852	0.000159747	3049	3050	8.01627e-05
IILSYCKI	ATCATACTAAGCTATTGCAAGATA	Pool 13	2651	2652	6.51755e-05	NA	1	2.00711e-08	218	219	4.85565e-06	38	39	7.7639e-07	934	935	2.38168e-05	1328	1861	1862	6.5543e-05	3196	3197	7.59089e-05	17	18	4.19517e-07	6	7	1.96185e-07	261	262	5.69387e-06	44	45	1.04913e-06	25	26	6.83354e-07
IILTESLL	ATAATACTGACGGAGAGTCTCTTA	Pool 13	4852	4853	0.000119267	233	234	4.69663e-06	3992	3993	8.85325e-05	12626	12627	0.000251371	1336	1337	3.40567e-05	1637.5	3873	3874	0.000136366	5553	5554	0.000131873	932	933	2.1745e-05	9	10	2.80264e-07	3498	3499	7.60415e-05	1780	1781	4.15222e-05	664	665	1.74781e-05
IILVSSSL	ATCATTCTTGTCTCTAGTTCACTA	Pool 13	6751	6752	0.000165937	403	404	8.10871e-06	1298	1299	2.88013e-05	6375	6376	0.00012693	4998	4999	0.000127337	3069	4852	4853	0.000170827	6325	6326	0.000150203	12	13	3.02985e-07	3663	3664	0.000102689	9623	9624	0.000209152	1602	1603	3.73723e-05	1340	1341	3.52453e-05
IIMASGEL	ATTATTATGGCTTCTGGCGAACTA	Pool 13	10838	10839	0.000266379	408	409	8.20906e-06	4198	4199	9.30999e-05	1132	1133	2.25551e-05	14044	14045	0.000357761	4296	6912	6913	0.00024334	11516	11517	0.000273457	1643	1644	3.83159e-05	616	617	1.72923e-05	2109	2110	4.58552e-05	6356	6357	0.000148207	2339	2340	6.15019e-05
IIMILYHL	ATCATCATGATTCTATATCATCTC	Pool 13	NA	1	2.4576e-08	NA	1	2.00711e-08	NA	1	2.21719e-08	NA	1	1.99074e-08	1	2	5.0945e-08	134.5	NA	1	3.52003e-08	NA	1	2.37438e-08	1	2	4.66131e-08	3	4	1.12105e-07	NA	1	2.17323e-08	NA	1	2.3314e-08	NA	1	2.62828e-08
IINIFTFL	ATAATAAACATTTTCACATTTCTC	Pool 13	11742	11743	0.000288596	11572	11573	0.000232282	55447	55448	0.00122939	4518	4519	8.99617e-05	4337	4338	0.0001105	2895	8543	8544	0.000300751	11911	11912	0.000282836	14101	14102	0.000328669	4800	4801	0.000134555	5437	5438	0.00011818	25018	25019	0.000583292	11369	11370	0.000298836
IIPMINPL	ATTATACCCATGATCAATCCTCTG	Pool 13	5702	5703	0.000140157	766	767	1.53945e-05	36682	36683	0.000813333	1345	1346	2.67954e-05	6668	6669	0.000169876	3455	4302	4303	0.000151467	6628	6629	0.000157398	353	354	8.25051e-06	81	82	2.29816e-06	107	108	2.34709e-06	6106	6107	0.000142378	1751	1752	4.60475e-05
IIPPAAPL	ATAATCCCACCCGCCGCCCCTCTC	Pool 13	1434	1435	3.52665e-05	184	185	3.71315e-06	261	262	5.80905e-06	428	429	8.54029e-06	5898	5899	0.000150262	3287	1033	1034	3.63971e-05	1904	1905	4.52319e-05	1871	1872	4.36298e-05	NA	1	2.80264e-08	411	412	8.95372e-06	NA	1	2.3314e-08	30	31	8.14768e-07
IIPRYRNF	ATTATACCTAGGTACCGGAATTTC	Pool 13	4907	4908	0.000120619	593	594	1.19222e-05	3736	3737	8.28565e-05	1551	1552	3.08963e-05	878	879	2.23903e-05	1284	2816	2817	9.91593e-05	4458	4459	0.000105874	1036	1037	2.41689e-05	12	13	3.64343e-07	553	554	1.20397e-05	1686	1687	3.93307e-05	4041	4042	0.000106235
IIPTIPLL	ATCATCCCGACAATACCGCTGCTC	Pool 13	1834	1835	4.50969e-05	7	8	1.60568e-07	3705	3706	8.21692e-05	10757	10758	0.000214164	1289	1290	3.28595e-05	1595	1660	1661	5.84677e-05	3115	3116	7.39857e-05	2924	2925	6.81716e-05	1	2	5.60527e-08	16	17	3.6945e-07	4	5	1.1657e-07	731	732	1.9239e-05
IIPWNGPL	ATAATCCCCTGGAATGGACCGCTG	Pool 13	3899	3900	9.58463e-05	173	174	3.49236e-06	286	287	6.36334e-06	3354	3355	6.67894e-05	5541	5542	0.000141169	3211	2930	2931	0.000103172	4705	4706	0.000111738	1213	1214	2.82941e-05	80	81	2.27014e-06	206	207	4.49859e-06	73	74	1.72523e-06	8943	8944	0.000235074
IIQEFPEI	ATTATCCAGGAGTTTCCTGAGATC	Pool 13	5881	5882	0.000144556	1562	1563	3.13711e-05	8443	8444	0.00018722	7457	7458	0.00014847	2691	2692	6.8572e-05	2348	3666	3667	0.00012908	5355	5356	0.000127172	3511	3512	8.18525e-05	114	115	3.22303e-06	6036	6037	0.000131198	185	186	4.3364e-06	2006	2007	5.27497e-05
IIRFFSKM	ATCATTCGATTCTTCTCAAAGATG	Pool 13	5253	5254	0.000129122	2842	2843	5.7062e-05	6019	6020	0.000133475	17105	17106	0.000340536	14273	14274	0.000363595	4311	3074	3075	0.000108241	5720	5721	0.000135838	5322	5323	0.000124061	41	42	1.17711e-06	2049	2050	4.45513e-05	2473	2474	5.76788e-05	33646	33647	0.000884339
IIRGLYHL	ATAATTAGAGGCTTATACCATTTG	Pool 13	4488	4489	0.000110321	687	688	1.38089e-05	97	98	2.17285e-06	7669	7670	0.00015269	1998	1999	5.09195e-05	2021	3198	3199	0.000112606	4440	4441	0.000105446	4	5	1.16533e-07	141	142	3.97974e-06	37	38	8.25829e-07	5161	5162	0.000120347	263	264	6.93867e-06
IISLLSQL	ATAATATCGCTGCTCTCACAGTTG	Pool 13	2950	2951	7.25237e-05	464	465	9.33304e-06	2019	2020	4.47873e-05	23	24	4.77778e-07	1333	1334	3.39803e-05	1634	1355	1356	4.77316e-05	2274	2275	5.40172e-05	1293	1294	3.01586e-05	14	15	4.20396e-07	8858	8859	0.000192527	814	815	1.90009e-05	3660	3661	9.62215e-05
IISVFYTI	ATTATAAGCGTATTCTACACTATA	Pool 13	4189	4190	0.000102973	643	644	1.29258e-05	4101	4102	9.09492e-05	1309	1310	2.60787e-05	7014	7015	0.00017869	3531.5	2274	2275	8.00807e-05	3503	3504	8.31983e-05	1578	1579	3.6801e-05	66	67	1.87777e-06	5174	5175	0.000112465	12540	12541	0.00029238	3127	3128	8.22127e-05
IITFFTFL	ATCATAACCTTCTTCACATTTCTC	Pool 13	7880	7881	0.000193683	350	351	7.04494e-06	1584	1585	3.51425e-05	4567	4568	9.09371e-05	2422	2423	6.17199e-05	2228	6639	6640	0.00023373	7962	7963	0.000189072	21244	21245	0.000495147	38	39	1.09303e-06	3142	3143	6.83048e-05	3828	3829	8.92692e-05	14844	14845	0.000390169
IIVGMFLL	ATAATCGTGGGCATGTTCCTATTG	Pool 13	7155	7156	0.000175866	2282	2283	4.58222e-05	11785	11786	0.000261318	3366	3367	6.70283e-05	5096	5097	0.000129833	3091	6076	6077	0.000213912	7928	7929	0.000188265	145	146	3.40275e-06	576	577	1.61712e-05	112	113	2.45575e-06	11908	11909	0.000277646	3868	3869	0.000101688
IIVLSTLL	ATTATTGTCCTGTCCACTCTGTTA	Pool 13	NA	1	2.4576e-08	NA	1	2.00711e-08	NA	1	2.21719e-08	NA	1	1.99074e-08	2	3	7.64175e-08	162.5	NA	1	3.52003e-08	1	2	4.74876e-08	NA	1	2.33065e-08	NA	1	2.80264e-08	NA	1	2.17323e-08	NA	1	2.3314e-08	NA	1	2.62828e-08
IIVMLYHL	ATCATCGTGATGCTTTATCACTTG	Pool 13	4487	4488	0.000110297	63	64	1.28455e-06	14089	14090	0.000312402	475	476	9.47593e-06	5049	5050	0.000128636	3082	3158	3159	0.000111198	4923	4924	0.000116914	305	306	7.1318e-06	689	690	1.93382e-05	596	597	1.29742e-05	1000	1001	2.33373e-05	1269	1270	3.33792e-05
IIVNFPSF	ATTATAGTGAACTTCCCTTCTTTC	Pool 13	4728	4729	0.00011622	232	233	4.67656e-06	408	409	9.06832e-06	481	482	9.59538e-06	7701	7702	0.000196189	3648	3814	3815	0.000134289	5868	5869	0.000139352	15940	15941	0.000371529	261	262	7.34291e-06	1050	1051	2.28407e-05	1519	1520	3.54372e-05	6890	6891	0.000181115
IIVSFVNA	ATTATTGTGTCCTTCGTAAATGCC	Pool 13	4629	4630	0.000113787	140	141	2.83002e-06	522	523	1.15959e-05	1135	1136	2.26148e-05	1535	1536	3.91258e-05	1773	3392	3393	0.000119435	4325	4326	0.000102716	174	175	4.07864e-06	15	16	4.48422e-07	2722	2723	5.91772e-05	469	470	1.09576e-05	335	336	8.83104e-06
IIVSSYAL	ATTATCGTTAGTAGCTACGCTTTG	Pool 13	11677	11678	0.000286998	5450	5451	0.000109407	543	544	1.20615e-05	10909	10910	0.00021719	5244	5245	0.000133603	3123	8700	8701	0.000306278	11702	11703	0.000277874	4604	4605	0.000107327	3287	3288	9.21507e-05	1270	1271	2.76218e-05	2493	2494	5.8145e-05	4009	4010	0.000105394
IIVSYFHI	ATCATTGTGAGTTACTTCCATATA	Pool 13	46844	46845	0.00115126	15717	15718	0.000315477	31987	31988	0.000709236	14650	14651	0.000291664	32180	32181	0.000819731	4807	33313	33314	0.00117266	48050	48051	0.00114091	29928	29929	0.000697541	57333	57334	0.00160686	39326	39327	0.000854668	29864	29865	0.000696272	126496	126497	0.0033247
IIVVIQNL	ATTATAGTTGTCATTCAAAACCTA	Pool 13	2843	2844	6.9894e-05	6	7	1.40497e-07	825	826	1.8314e-05	1176	1177	2.3431e-05	506	507	1.29146e-05	962	1951	1952	6.8711e-05	3039	3040	7.21812e-05	114	115	2.68025e-06	5	6	1.68158e-07	1842	1843	4.00527e-05	8	9	2.09826e-07	4556	4557	0.000119771
IIWHSLAL	ATAATATGGCATAGCTTAGCGCTT	Pool 13	9599	9600	0.000235929	1744	1745	3.5024e-05	8531	8532	0.000189171	8835	8836	0.000175902	4032	4033	0.000102731	2813	5922	5923	0.000208491	9286	9287	0.000220509	10412	10413	0.000242691	1818	1819	5.098e-05	8607	8608	0.000187072	426	427	9.95506e-06	6507	6508	0.000171049
IIWLKENL	ATAATATGGCTTAAAGAGAATCTT	Pool 13	4337	4338	0.000106611	2697	2698	5.41517e-05	996	997	2.21054e-05	1479	1480	2.9463e-05	3305	3306	8.42121e-05	2583	2356	2357	8.29671e-05	3745	3746	8.89443e-05	115	116	2.70356e-06	733	734	2.05714e-05	1562	1563	3.39677e-05	4487	4488	0.000104633	3514	3515	9.23842e-05
IIWQCALL	ATCATATGGCAATGTGCCCTACTT	Pool 13	5094	5095	0.000125215	818	819	1.64382e-05	1985	1986	4.40334e-05	1021	1022	2.03454e-05	8864	8865	0.000225814	3807	2617	2618	9.21544e-05	4622	4623	0.000109768	91	92	2.1442e-06	12	13	3.64343e-07	3765	3766	8.1844e-05	9390	9391	0.000218941	1978	1979	5.20138e-05
IIWSSVSM	ATAATTTGGTCAAGTGTATCTATG	Pool 13	1128	1129	2.77463e-05	2	3	6.02132e-08	4	5	1.1086e-07	949	950	1.89121e-05	444	445	1.13353e-05	900	677	678	2.38658e-05	1065	1066	2.53109e-05	165	166	3.86888e-06	1	2	5.60527e-08	11	12	2.60788e-07	2	3	6.99419e-08	99	100	2.62828e-06
IIYIKVYM	ATCATATACATAAAAGTGTACATG	Pool 13	3766	3767	9.25777e-05	6480	6481	0.000130081	1081	1082	2.399e-05	351	352	7.00741e-06	1808	1809	4.60798e-05	1922.5	1877	1878	6.61062e-05	3172	3173	7.53391e-05	3	4	9.32261e-08	1604	1605	4.49823e-05	869	870	1.89071e-05	16	17	3.96337e-07	380	381	1.00138e-05
IIYMTILL	ATTATCTACATGACCATACTACTT	Pool 13	13293	13294	0.000326713	208502	208503	0.00418488	8830	8831	0.0001958	10569	10570	0.000210421	5346	5347	0.000136202	3158	9882	9883	0.000347885	14641	14642	0.000347657	2251	2252	5.24863e-05	9889	9890	0.000277181	2354	2355	5.11797e-05	3349	3350	7.81018e-05	49674	49675	0.0013056
IIYMTSMV	ATTATATACATGACATCCATGGTT	Pool 13	3210	3211	7.89134e-05	53	54	1.08384e-06	86	87	1.92896e-06	42	43	8.56019e-07	1057	1058	2.69499e-05	1416	1802	1803	6.34662e-05	3540	3541	8.40768e-05	704	705	1.64311e-05	30	31	8.68817e-07	39860	39861	0.000866273	159	160	3.73023e-06	1673	1674	4.39975e-05
IIYNFGMV	ATTATTTATAATTTTGGAATGGTA	Pool 13	10069	10070	0.00024748	31527	31528	0.0006328	12323	12324	0.000273247	7876	7877	0.000156811	7967	7968	0.000202965	3682.5	7585	7586	0.00026703	10548	10549	0.000250473	17197	17198	0.000400826	837	838	2.34861e-05	4421	4422	9.61004e-05	7454	7455	0.000173806	13054	13055	0.000343123
IIYNILLF	ATTATTTATAATATCCTACTCTTT	Pool 13	18077	18078	0.000444284	57038	57039	0.00114483	9579	9580	0.000212407	44615	44616	0.00088819	8768	8769	0.000223368	3792	15109	15110	0.000531877	17139	17140	0.000406969	7246	7247	0.000168902	26092	26093	0.000731292	5861	5862	0.000127395	37001	37002	0.000862663	26977	26978	0.000709059
IIYNNLGI	ATTATATACAACAACTTAGGGATC	Pool 13	NA	1	2.4576e-08	NA	1	2.00711e-08	1	2	4.43439e-08	NA	1	1.99074e-08	NA	1	2.54725e-08	64	NA	1	3.52003e-08	NA	1	2.37438e-08	NA	1	2.33065e-08	NA	1	2.80264e-08	NA	1	2.17323e-08	1	2	4.66279e-08	1	2	5.25657e-08
IIYPLIVL	ATCATTTATCCCCTAATTGTACTT	Pool 13	8786	8787	0.000215949	542	543	1.08986e-05	2784	2785	6.17488e-05	6911	6912	0.0001376	7138	7139	0.000181848	3564	6241	6242	0.00021972	9397	9398	0.000223144	1380	1381	3.21863e-05	2112	2113	5.92197e-05	3409	3410	7.41073e-05	11310	11311	0.000263704	3712	3713	9.75882e-05
IIYRDTPV	ATAATCTATAGAGACACGCCGGTG	Pool 13	864	865	2.12582e-05	NA	1	2.00711e-08	NA	1	2.21719e-08	2	3	5.97223e-08	2344	2345	5.9733e-05	2185	348	349	1.22849e-05	782	783	1.85914e-05	NA	1	2.33065e-08	1172	1173	3.28749e-05	847	848	1.8429e-05	1	2	4.66279e-08	NA	1	2.62828e-08
IIYSFSLL	ATAATTTATTCATTTTCCTTACTG	Pool 13	35914	35915	0.000882646	50408	50409	0.00101176	57905	57906	0.00128389	14234	14235	0.000283382	39482	39483	0.00100573	4864	27550	27551	0.000969804	35932	35933	0.000853186	31884	31885	0.000743129	19199	19200	0.000538106	84794	84795	0.00184279	32970	32971	0.000768685	8812	8813	0.000231631
IIYTLRNT	ATAATTTATACGCTCCGTAACACT	Pool 13	5592	5593	0.000137453	419	420	8.42984e-06	4871	4872	0.000108022	20544	20545	0.000408998	4758	4759	0.000121224	3013	3362	3363	0.000118379	5456	5457	0.00012957	19	20	4.66131e-07	30	31	8.68817e-07	6955	6956	0.00015117	4159	4160	9.69861e-05	4935	4936	0.000129732
IKYSYEYL	ATTAAGTATAGTTACGAGTACCTC	Pool 13	4540	4541	0.000111599	5008	5009	0.000100536	3434	3435	7.61606e-05	184547	184548	0.00367388	13121	13122	0.00033425	4238	3532	3533	0.000124363	4386	4387	0.000104164	1333	1334	3.10909e-05	198	199	5.57725e-06	4206	4207	9.1428e-05	545	546	1.27294e-05	10794	10795	0.000283723
ILAVFYTV	ATTCTAGCGGTATTCTACACTGTC	Pool 13	9788	9789	0.000240574	2698	2699	5.41718e-05	31053	31054	0.000688527	9801	9802	0.000195133	4357	4358	0.000111009	2902	7624	7625	0.000268402	10506	10507	0.000249476	17568	17569	0.000409472	860	861	2.41307e-05	2220	2221	4.82675e-05	4090	4091	9.53774e-05	7087	7088	0.000186293
ILCLYIHM	ATTCTATGCCTTTATATCCATATG	Pool 13	10747	10748	0.000264142	1546	1547	3.10499e-05	12881	12882	0.000285619	6533	6534	0.000130075	6159	6160	0.000156911	3349	7280	7281	0.000256293	11693	11694	0.00027766	6181	6182	0.000144081	911	912	2.556e-05	12945	12946	0.000281347	1354	1355	3.15904e-05	19186	19187	0.000504289
ILFAQLGL	ATCCTTTTCGCACAGCTTGGCCTA	Pool 13	87	88	2.16268e-06	NA	1	2.00711e-08	NA	1	2.21719e-08	1	2	3.98148e-08	3	4	1.0189e-07	188	17	18	6.33606e-07	90	91	2.16069e-06	NA	1	2.33065e-08	NA	1	2.80264e-08	NA	1	2.17323e-08	NA	1	2.3314e-08	5	6	1.57697e-07
ILFAVALM	ATACTGTTCGCTGTTGCTCTGATG	Pool 13	13847	13848	0.000340328	1041	1042	2.0914e-05	47624	47625	0.00105594	13743	13744	0.000273608	11968	11969	0.00030488	4160	10942	10943	0.000385197	14730	14731	0.00034977	7375	7376	0.000171909	1039	1040	2.91474e-05	46414	46415	0.00100871	2305	2306	5.3762e-05	3478	3479	9.1438e-05
ILFFFMLL	ATTTTGTTCTTCTTTATGCTACTG	Pool 13	8639	8640	0.000212336	1324	1325	2.65942e-05	6164	6165	0.00013669	2740	2741	5.45663e-05	6455	6456	0.000164451	3411.5	7639	7640	0.00026893	9165	9166	0.000217636	3963	3964	9.23871e-05	3911	3912	0.000109639	2801	2802	6.0894e-05	4749	4750	0.000110741	5890	5891	0.000154832
ILFKVALM	ATTCTCTTTAAGGTAGCTCTCATG	Pool 13	10937	10938	0.000268812	12065	12066	0.000242177	10662	10663	0.000236419	21654	21655	0.000431095	9672	9673	0.000246396	3915	7294	7295	0.000256786	10385	10386	0.000246603	1317	1318	3.0718e-05	18848	18849	0.000528269	1368	1369	2.97516e-05	16735	16736	0.000390183	10905	10906	0.000286641
ILFLASPL	ATATTGTTCCTCGCCTCACCACTC	Pool 13	3963	3964	9.74191e-05	527	528	1.05975e-05	108729	108730	0.00241075	7545	7546	0.000150221	11023	11024	0.000280809	4071	2534	2535	8.92328e-05	4032	4033	9.57588e-05	700	701	1.63379e-05	77	78	2.18606e-06	520	521	1.13226e-05	70	71	1.65529e-06	2817	2818	7.40651e-05
ILFSTPTI	ATCCTCTTTAGTACTCCGACGATC	Pool 13	8618	8619	0.00021182	7758	7759	0.000155731	2369	2370	5.25475e-05	2834	2835	5.64375e-05	5270	5271	0.000134266	3129	6733	6734	0.000237039	8528	8529	0.000202511	7318	7319	0.00017058	945	946	2.65129e-05	6810	6811	0.000148019	346	347	8.08995e-06	6920	6921	0.000181904
ILFVAAGL	ATCTTATTTGTGGCTGCGGGCTTA	Pool 13	14673	14674	0.000360628	17719	17720	0.000355659	8489	8490	0.00018824	7882	7883	0.00015693	11167	11168	0.000284477	4082	9603	9604	0.000338064	13819	13820	0.000328139	4000	4001	9.32494e-05	2222	2223	6.23026e-05	17652	17653	0.000383641	15000	15001	0.000349733	12373	12374	0.000325224
ILFYHLAA	ATTCTATTCTATCACCTAGCTGCA	Pool 13	6832	6833	0.000167928	543	544	1.09187e-05	2630	2631	5.83343e-05	4788	4789	9.53367e-05	2011	2012	5.12507e-05	2030.5	4448	4449	0.000156606	7085	7086	0.000168249	7204	7205	0.000167924	2288	2289	6.41524e-05	5270	5271	0.000114551	826	827	1.92806e-05	2298	2299	6.04243e-05
ILHEYDLL	ATCCTGCATGAATATGACTTACTT	Pool 13	5208	5209	0.000128016	70	71	1.42505e-06	2342	2343	5.19488e-05	813	814	1.62046e-05	201	202	5.14545e-06	615	3098	3099	0.000109086	5577	5578	0.000132443	1344	1345	3.13473e-05	10463	10464	0.000293268	884	885	1.92331e-05	11501	11502	0.000268157	1693	1694	4.45231e-05
ILHVKSNL	ATACTCCATGTGAAATCCAATTTA	Pool 13	2755	2756	6.77314e-05	528	529	1.06176e-05	973	974	2.15955e-05	974	975	1.94097e-05	709	710	1.80855e-05	1142	1426	1427	5.02308e-05	2858	2859	6.78835e-05	803	804	1.87384e-05	283	284	7.95949e-06	2520	2521	5.47872e-05	10944	10945	0.000255171	539	540	1.41927e-05
ILKFAQYL	ATTCTAAAGTTTGCTCAGTATCTT	Pool 13	17157	17158	0.000421674	22572	22573	0.000453064	21027	21028	0.000466231	19512	19513	0.000388454	19890	19891	0.000506674	4551	13578	13579	0.000477985	18606	18607	0.000441801	27626	27627	0.000643889	14974	14975	0.000419695	33073	33074	0.000718775	16609	16610	0.000387245	6371	6372	0.000167474
ILLAAFGL	ATTCTGCTCGCCGCATTTGGTCTA	Pool 13	4202	4203	0.000103293	637	638	1.28053e-05	4244	4245	9.41198e-05	716	717	1.42736e-05	2491	2492	6.34775e-05	2259	2296	2297	8.08551e-05	3837	3838	9.11287e-05	2690	2691	6.27179e-05	111	112	3.13895e-06	8375	8376	0.00018203	119	120	2.79768e-06	650	651	1.71101e-05
ILLFLSFL	ATCTTACTTTTCCTGTCCTTTCTT	Pool 13	70132	70133	0.00172359	196927	196928	0.00395255	72615	72616	0.00161004	109742	109743	0.0021847	23987	23988	0.000611035	4672	60521	60522	0.00213039	77094	77095	0.00183053	84875	84876	0.00197816	102747	102748	0.00287965	49070	49071	0.00106643	171944	171945	0.00400872	101750	101751	0.00267431
ILLHIPRL	ATTTTGCTGCACATCCCACGGCTC	Pool 13	3589	3590	8.82277e-05	53	54	1.08384e-06	14329	14330	0.000317724	614	615	1.22431e-05	1045	1046	2.66442e-05	1406	2468	2469	8.69096e-05	3415	3416	8.11088e-05	3007	3008	7.0106e-05	706	707	1.98146e-05	28095	28096	0.000610592	180	181	4.21983e-06	196	197	5.17772e-06
ILLLVHNL	ATTCTTCTCTTGGTCCACAACCTT	Pool 13	10006	10007	0.000245932	459	460	9.23269e-06	3823	3824	8.47855e-05	2486	2487	4.95098e-05	2968	2969	7.56279e-05	2455	7805	7806	0.000274774	10641	10642	0.000252682	7900	7901	0.000184145	3118	3119	8.74142e-05	7644	7645	0.000166144	1084	1085	2.52957e-05	6817	6818	0.000179196
ILLNYAVL	ATTCTTCTTAATTACGCCGTTCTG	Pool 13	9350	9351	0.00022981	342	343	6.88437e-06	5765	5766	0.000127843	2887	2888	5.74926e-05	5079	5080	0.0001294	3085	8845	8846	0.000311382	9629	9630	0.000228653	1396	1397	3.25592e-05	200917	200918	0.005631	10744	10745	0.000233514	2909	2910	6.78436e-05	3340	3341	8.7811e-05
ILLQFPFL	ATACTCCTCCAGTTTCCTTTCCTG	Pool 13	24328	24329	0.000597909	12234	12235	0.000245569	6002	6003	0.000133098	12212	12213	0.000243129	13317	13318	0.000339243	4251	14428	14429	0.000507905	22366	22367	0.000531078	17658	17659	0.00041157	37539	37540	0.00105211	37094	37095	0.000806161	13826	13827	0.000322362	11160	11161	0.000293343
ILLSIPQL	ATTCTCCTCTCTATCCCGCAGCTT	Pool 13	7631	7632	0.000187564	527	528	1.05975e-05	2212	2213	4.90665e-05	7671	7672	0.00015273	3017	3018	7.6876e-05	2469	6394	6395	0.000225106	9773	9774	0.000232072	6685	6686	0.000155827	20475	20476	0.000573868	9333	9334	0.00020285	18173	18174	0.000423708	2954	2955	7.76658e-05
ILLSVLNL	ATCTTACTTTCCGTCCTCAACCTC	Pool 13	9545	9546	0.000234602	1650	1651	3.31373e-05	49684	49685	0.00110161	6495	6496	0.000129319	8207	8208	0.000209078	3719	7608	7609	0.000267839	10965	10966	0.000260375	496	497	1.15833e-05	76	77	2.15803e-06	12547	12548	0.000272697	622	623	1.45246e-05	11301	11302	0.000297049
ILMCFVRI	ATCCTCATGTGTTTTGTTAGGATA	Pool 13	21170	21171	0.000520298	4253	4254	8.53823e-05	2009	2010	4.45656e-05	8060	8061	0.000160474	9644	9645	0.000245682	3907	13120	13121	0.000461863	21282	21283	0.000505339	8739	8740	0.000203699	39756	39757	0.00111424	9511	9512	0.000206718	6168	6169	0.000143824	29576	29577	0.000777368
ILMIKPRL	ATCCTCATGATCAAACCTAGGCTT	Pool 13	3144	3145	7.72914e-05	506	507	1.0176e-05	1598	1599	3.54529e-05	154	155	3.08565e-06	318	319	8.12573e-06	760.5	2265	2266	7.97639e-05	3598	3599	8.54539e-05	229	230	5.3605e-06	25	26	7.28686e-07	863	864	1.87767e-05	NA	1	2.3314e-08	921	922	2.42328e-05
ILMLTSSL	ATACTCATGCTCACGTCGAGTTTG	Pool 13	2938	2939	7.22288e-05	447	448	8.99183e-06	4378	4379	9.70909e-05	135	136	2.70741e-06	36	37	9.42483e-07	328.5	1732	1733	6.10021e-05	3362	3363	7.98504e-05	8743	8744	0.000203792	16	17	4.76448e-07	280	281	6.10679e-06	5112	5113	0.000119204	7329	7330	0.000192653
ILMTHSML	ATTCTGATGACGCATAGCATGTTA	Pool 13	2547	2548	6.26196e-05	1399	1400	2.80995e-05	762	763	1.69172e-05	286	287	5.71343e-06	55	56	1.42646e-06	377	2269	2270	7.99047e-05	2937	2938	6.97593e-05	2823	2824	6.58176e-05	2	3	8.40791e-08	181	182	3.95529e-06	94	95	2.21483e-06	714	715	1.87922e-05
ILMTLKML	ATACTTATGACACTTAAAATGCTA	Pool 13	4154	4155	0.000102113	158	159	3.1913e-06	6	7	1.55203e-07	971	972	1.935e-05	3176	3177	8.09262e-05	2538	2251	2252	7.92711e-05	4253	4254	0.000101006	1554	1555	3.62416e-05	18008	18009	0.000504727	61	62	1.34741e-06	2098	2099	4.8936e-05	701	702	1.84506e-05
ILNFQRAL	ATATTGAATTTCCAAAGAGCGTTG	Pool 13	963	964	2.36912e-05	237	238	4.77691e-06	10	11	2.43891e-07	275	276	5.49445e-06	620	621	1.58184e-05	1080	785	786	2.76674e-05	813	814	1.93275e-05	NA	1	2.33065e-08	2	3	8.40791e-08	NA	1	2.17323e-08	NA	1	2.3314e-08	120	121	3.18022e-06
ILPILGSL	ATCTTGCCCATTCTCGGATCTCTC	Pool 13	20004	20005	0.000491642	2489	2490	4.99769e-05	20457	20458	0.000453593	29395	29396	0.000585199	23176	23177	0.000590376	4654	14472	14473	0.000509454	21364	21365	0.000507286	25967	25968	0.000605224	17561	17562	0.000492199	16691	16692	0.000362756	28414	28415	0.000662466	19801	19802	0.000520453
ILPPFELL	ATTCTACCGCCATTTGAGTTACTA	Pool 13	3842	3843	9.44454e-05	68	69	1.3849e-06	2343	2344	5.1971e-05	732	733	1.45921e-05	759	760	1.93591e-05	1184	2556	2557	9.00072e-05	4059	4060	9.63998e-05	1391	1392	3.24427e-05	10	11	3.0829e-07	24	25	5.43309e-07	10887	10888	0.000253842	759	760	1.9975e-05
ILQMFGKM	ATACTACAGATGTTTGGCAAGATG	Pool 13	3098	3099	7.61609e-05	5606	5607	0.000112538	726	727	1.6119e-05	7350	7351	0.000146339	1822	1823	4.64364e-05	1935	931	932	3.28067e-05	2931	2932	6.96168e-05	2817	2818	6.56778e-05	1169	1170	3.27909e-05	16754	16755	0.000364125	504	505	1.17736e-05	924	925	2.43116e-05
ILQTFLYL	ATACTCCAAACCTTCCTGTACCTC	Pool 13	1412	1413	3.47258e-05	12	13	2.60924e-07	484	485	1.07534e-05	221	222	4.41945e-06	6701	6702	0.000170717	3461.5	1066	1067	3.75587e-05	1397	1398	3.31938e-05	504	505	1.17698e-05	2	3	8.40791e-08	261	262	5.69387e-06	9616	9617	0.00022421	3973	3974	0.000104448
ILREFVSI	ATTCTTAGGGAGTTCGTAAGTATC	Pool 13	112136	112137	0.00275587	419656	419657	0.00842296	133054	133055	0.00295009	135596	135597	0.00269939	84324	84325	0.00214797	4975	79542	79543	0.00279994	113043	113044	0.00268409	87128	87129	0.00203067	59768	59769	0.00167511	134920	134921	0.00293215	289438	289439	0.00674797	116025	116026	0.00304949
ILRHFHLL	ATTCTTAGACATTTTCACCTACTC	Pool 13	6877	6878	0.000169033	903	904	1.81442e-05	3091	3092	6.85556e-05	4448	4449	8.85681e-05	7779	7780	0.000198176	3659	5580	5581	0.000196453	7152	7153	0.000169839	7439	7440	0.000173401	2114	2115	5.92758e-05	1099	1100	2.39056e-05	5526	5527	0.000128856	3087	3088	8.11614e-05
ILRRFLVL	ATCTTACGCCGCTTTCTCGTGTTA	Pool 13	7443	7444	0.000182943	65	66	1.32469e-06	2739	2740	6.07511e-05	1807	1808	3.59926e-05	4120	4121	0.000104972	2834	4954	4955	0.000174418	7547	7548	0.000179218	14	15	3.49598e-07	288	289	8.09962e-06	446	447	9.71436e-06	19029	19030	0.000443665	3570	3571	9.3856e-05
ILRYFGKL	ATTCTCAGGTATTTTGGTAAGCTG	Pool 13	41847	41848	0.00102845	5937	5938	0.000119182	40844	40845	0.000905612	18289	18290	0.000364107	27571	27572	0.000702328	4730	25256	25257	0.000889054	37310	37311	0.000885905	22102	22103	0.000515144	19699	19700	0.000552119	108058	108059	0.00234838	50608	50609	0.0011799	20224	20225	0.000531571
ILSCFCPM	ATACTCAGTTGCTTCTGTCCCATG	Pool 13	5805	5806	0.000142688	425	426	8.55027e-06	8330	8331	0.000184714	16300	16301	0.000324511	9192	9193	0.000234169	3850	3767	3768	0.000132635	6323	6324	0.000150156	2502	2503	5.83362e-05	22	23	6.44606e-07	7024	7025	0.00015267	6876	6877	0.00016033	32810	32811	0.000862366
ILSIFYTI	ATACTCTCGATTTTCTACACGATT	Pool 13	5561	5562	0.000136692	147	148	2.97052e-06	2797	2798	6.20371e-05	435	436	8.67964e-06	1715	1716	4.37108e-05	1870	3957	3958	0.000139323	5513	5514	0.000130923	1529	1530	3.5659e-05	6169	6170	0.000172923	345	346	7.51939e-06	177	178	4.14989e-06	704	705	1.85294e-05
ILTVFYTI	ATCTTGACTGTATTTTACACCATT	Pool 13	14293	14294	0.000351289	16257	16258	0.000326315	30752	30753	0.000681853	2405	2406	4.78973e-05	13552	13553	0.000345229	4271	9926	9927	0.000349434	14210	14211	0.000337423	3051	3052	7.11315e-05	24970	24971	0.000699846	4615	4616	0.000100316	10631	10632	0.000247874	10192	10193	0.000267901
ILVLFSSL	ATATTAGTTCTGTTTTCGTCTCTT	Pool 13	19603	19604	0.000481787	3250	3251	6.5251e-05	6242	6243	0.000138419	12893	12894	0.000256686	12563	12564	0.000320037	4199	16742	16743	0.000589359	21289	21290	0.000505506	10254	10255	0.000239008	4500	4501	0.000126147	15154	15155	0.000329354	16433	16434	0.000383142	11633	11634	0.000305775
ILVLTYPL	ATACTTGTTTTGACATACCCGCTC	Pool 13	3591	3592	8.82769e-05	13245	13246	0.000265861	7016	7017	0.00015558	10985	10986	0.000218703	3648	3649	9.29492e-05	2690	1570	1571	5.52997e-05	2947	2948	6.99967e-05	1908	1909	4.44922e-05	1242	1243	3.48368e-05	8028	8029	0.000174489	1473	1474	3.43648e-05	8780	8781	0.00023079
ILVSFGLF	ATCCTCGTATCCTTCGGGTTATTT	Pool 13	54058	54059	0.00132855	139771	139772	0.00280537	30348	30349	0.000672896	50508	50509	0.0010055	36311	36312	0.000924958	4846	40586	40587	0.00142868	58610	58611	0.00139165	49979	49980	0.00116486	25466	25467	0.000713748	48357	48358	0.00105093	32390	32391	0.000755163	95625	95626	0.00251332
ILVSIFAL	ATTCTCGTGTCTATATTTGCGCTG	Pool 13	11031	11032	0.000271122	9649	9650	0.000193686	9703	9704	0.000215156	25692	25693	0.000511481	4395	4396	0.000111977	2911.5	8397	8398	0.000295612	11744	11745	0.000278871	991	992	2.31201e-05	98174	98175	0.00275149	1159	1160	2.52095e-05	7353	7354	0.000171451	10945	10946	0.000287692
ILVSYIRV	ATTCTGGTATCGTACATTCGAGTT	Pool 13	18781	18782	0.000461586	1085	1086	2.17972e-05	23657	23658	0.000524543	13135	13136	0.000261504	11014	11015	0.00028058	4068	14700	14701	0.00051748	19141	19142	0.000454504	5752	5753	0.000134082	35945	35946	0.00100744	6332	6333	0.000137631	7356	7357	0.000171521	12414	12415	0.000326302
ILYAAPQL	ATACTATATGCGGCACCCCAATTG	Pool 13	4529	4530	0.000111329	119931	119932	0.00240716	11600	11601	0.000257217	10653	10654	0.000212094	6057	6058	0.000154312	3318	3682	3683	0.000129643	4948	4949	0.000117508	4227	4228	9.854e-05	744	745	2.08796e-05	3602	3603	7.83016e-05	1765	1766	4.11725e-05	463	464	1.21952e-05
ILYAYQLS	ATCTTATATGCCTATCAGCTCAGC	Pool 13	7547	7548	0.000185499	1958	1959	3.93192e-05	5454	5455	0.000120948	8924	8925	0.000177674	6217	6218	0.000158388	3355	4713	4714	0.000165934	7046	7047	0.000167323	608	609	1.41937e-05	424	425	1.19112e-05	297	298	6.47624e-06	1874	1875	4.37137e-05	2087	2088	5.48786e-05
ILYDHTAL	ATTCTTTACGATCATACTGCATTA	Pool 13	5663	5664	0.000139198	3400	3401	6.82617e-05	7097	7098	0.000157376	5507	5508	0.00010965	8397	8398	0.000213918	3747	4097	4098	0.000144251	5570	5571	0.000132277	4674	4675	0.000108958	336	337	9.44489e-06	1326	1327	2.88388e-05	284	285	6.64448e-06	1636	1637	4.3025e-05
ILYDIHYI	ATACTATATGACATCCACTATATC	Pool 13	11683	11684	0.000287146	5563	5564	0.000111675	8892	8893	0.000197175	5265	5266	0.000104832	5438	5439	0.000138545	3189	8568	8569	0.000301631	12886	12887	0.000305986	3176	3177	7.40448e-05	1846	1847	5.17647e-05	4464	4465	9.70349e-05	1123	1124	2.62049e-05	20372	20373	0.00053546
ILYDREGL	ATTTTGTATGATCGAGAGGGATTA	Pool 13	3204	3205	7.8766e-05	2897	2898	5.81659e-05	364	365	8.09275e-06	9152	9153	0.000182213	1123	1124	2.86311e-05	1467	2420	2421	8.522e-05	3808	3809	9.04401e-05	1778	1779	4.14623e-05	15	16	4.48422e-07	3255	3256	7.07605e-05	2404	2405	5.60701e-05	794	795	2.08949e-05
ILYFFFLL	ATTCTGTACTTCTTCTTTCTTCTG	Pool 13	36345	36346	0.000893238	269411	269412	0.00540738	25678	25679	0.000569353	36710	36711	0.000730821	45353	45354	0.00115528	4908	31853	31854	0.00112127	35783	35784	0.000849648	19043	19044	0.000443849	8674	8675	0.000243129	58891	58892	0.00127986	70623	70624	0.00164653	51439	51440	0.00135199
ILYFMLGL	ATCCTATACTTCATGCTTGGCCTA	Pool 13	863	864	2.12336e-05	377	378	7.58686e-06	625	626	1.38796e-05	173	174	3.46389e-06	173	174	4.43222e-06	584	531	532	1.87266e-05	1017	1018	2.41712e-05	1818	1819	4.23946e-05	2	3	8.40791e-08	119	120	2.60788e-06	1362	1363	3.17769e-05	181	182	4.78348e-06
ILYGMLLL	ATCTTATACGGGATGCTGTTGCTA	Pool 13	7151	7152	0.000175767	318	319	6.40267e-06	11274	11275	0.000249988	3479	3480	6.92778e-05	2629	2630	6.69927e-05	2321	4741	4742	0.00016692	7839	7840	0.000186151	599	600	1.39839e-05	1400	1401	3.92649e-05	24793	24794	0.000538832	11027	11028	0.000257106	2354	2355	6.18961e-05
ILYIVSYF	ATCCTGTACATCGTGTCCTACTTC	Pool 13	11301	11302	0.000277758	469	470	9.4334e-06	2258	2259	5.00864e-05	4924	4925	9.80441e-05	17049	17050	0.000434306	4446	7156	7157	0.000251929	11308	11309	0.000268519	4957	4958	0.000115554	164	165	4.62435e-06	10863	10864	0.0002361	1362	1363	3.17769e-05	10444	10445	0.000274524
ILYLMAVV	ATACTGTATCTGATGGCAGTGGTC	Pool 13	2465	2466	6.06043e-05	1216	1217	2.44265e-05	99	100	2.21719e-06	461	462	9.19723e-06	3222	3223	8.20979e-05	2550	1644	1645	5.79045e-05	2680	2681	6.36571e-05	451	452	1.05345e-05	117	118	3.30711e-06	989	990	2.1515e-05	432	433	1.00949e-05	268	269	7.07009e-06
ILYNNLGL	ATACTGTATAACAACTTGGGGCTC	Pool 13	6281	6282	0.000154386	265	266	5.3389e-06	4760	4761	0.000105561	7511	7512	0.000149545	2065	2066	5.26262e-05	2055	3765	3766	0.000132564	6162	6163	0.000146333	1804	1805	4.20683e-05	12548	12549	0.000351703	317	318	6.91088e-06	18535	18536	0.000432148	23915	23916	0.000628581
ILYPTLPV	ATTCTGTACCCTACACTGCCCGTC	Pool 13	9788	9789	0.000240574	252	253	5.07798e-06	7794	7795	0.00017283	1466	1467	2.92042e-05	4906	4907	0.000124994	3049.5	6327	6328	0.000222748	9580	9581	0.000227489	241	242	5.64018e-06	212	213	5.96962e-06	936	937	2.03632e-05	1468	1469	3.42482e-05	7092	7093	0.000186424
ILYPYELF	ATCTTATACCCGTATGAGCTGTTT	Pool 13	3955	3956	9.72225e-05	1662	1663	3.33782e-05	1134	1135	2.51651e-05	2366	2367	4.71209e-05	992	993	2.52942e-05	1367.5	2684	2685	9.45128e-05	4253	4254	0.000101006	79	80	1.86452e-06	14	15	4.20396e-07	3220	3221	6.99999e-05	4200	4201	9.7942e-05	2805	2806	7.37497e-05
ILYSHYTT	ATACTGTATTCCCATTACACCACG	Pool 13	2651	2652	6.51755e-05	535	536	1.07581e-05	82	83	1.84027e-06	3084	3085	6.14144e-05	454	455	1.159e-05	912.5	1246	1247	4.38948e-05	2772	2773	6.58416e-05	NA	1	2.33065e-08	54	55	1.54145e-06	1675	1676	3.64234e-05	556	557	1.29859e-05	168	169	4.4418e-06
ILYTVLSI	ATCTTGTACACAGTCCTTTCAATA	Pool 13	9598	9599	0.000235905	3375	3376	6.77599e-05	5603	5604	0.000124251	6133	6134	0.000122112	5334	5335	0.000135896	3151	6432	6433	0.000226444	9825	9826	0.000233307	3741	3742	8.7213e-05	2178	2179	6.10695e-05	4094	4095	8.89939e-05	201964	201965	0.00470861	10556	10557	0.000277468
ILYTYQLL	ATATTATATACCTATCAACTACTA	Pool 13	2246	2247	5.52222e-05	167	168	3.37194e-06	1249	1250	2.77149e-05	7576	7577	0.000150839	1137	1138	2.89877e-05	1479	1911	1912	6.7303e-05	2197	2198	5.21889e-05	1102	1103	2.57071e-05	3	4	1.12105e-07	230	231	5.02017e-06	228	229	5.3389e-06	975	976	2.56521e-05
IMFLFVLA	ATCATGTTTCTGTTTGTTCTTGCT	Pool 13	11562	11563	0.000284172	1738	1739	3.49036e-05	767	768	1.7028e-05	37313	37314	0.000742826	3835	3836	9.77125e-05	2748	7495	7496	0.000263862	11254	11255	0.000267237	13497	13498	0.000314591	40	41	1.14908e-06	866	867	1.88419e-05	840	841	1.9607e-05	5372	5373	0.000141218
IMFRYAVD	ATTATGTTCCGTTACGCGGTCGAT	Pool 13	3975	3976	9.7714e-05	290	291	5.84068e-06	59	60	1.33032e-06	3639	3640	7.2463e-05	6673	6674	0.000170004	3456	2818	2819	9.92297e-05	3504	3505	8.3222e-05	10997	10998	0.000256325	20	21	5.88554e-07	409	410	8.91026e-06	78	79	1.8418e-06	92	93	2.4443e-06
IMFSFRVP	ATAATGTTCAGTTTCAGAGTTCCA	Pool 13	9922	9923	0.000243867	56953	56954	0.00114313	11192	11193	0.00024817	10853	10854	0.000216075	4698	4699	0.000119695	3006	7336	7337	0.000258265	10495	10496	0.000249215	16851	16852	0.000392762	7549	7550	0.000211599	8669	8670	0.000188419	11282	11283	0.000263051	1217	1218	3.20125e-05
IMFSIIFL	ATAATGTTCTCGATCATCTTCTTA	Pool 13	13646	13647	0.000335388	6477	6478	0.00013002	51623	51624	0.0011446	6807	6808	0.00013553	5095	5096	0.000129808	3090	11096	11097	0.000390618	14598	14599	0.000346636	5894	5895	0.000137392	1255	1256	3.52011e-05	4512	4513	9.80781e-05	104588	104589	0.00243838	7330	7331	0.00019268
IMFSLNTV	ATAATGTTCAGTCTTAATACAGTT	Pool 13	11138	11139	0.000273752	2633	2634	5.28672e-05	23273	23274	0.000516029	6754	6755	0.000134475	9492	9493	0.000241811	3891	8123	8124	0.000285967	11474	11475	0.00027246	11860	11861	0.000276439	771	772	2.16364e-05	5647	5648	0.000122744	10200	10201	0.000237826	5036	5037	0.000132387
IMFVDPSL	ATTATGTTTGTGGACCCGTCCCTT	Pool 13	15165	15166	0.000372719	1315	1316	2.64135e-05	10530	10531	0.000233493	5400	5401	0.00010752	14038	14039	0.000357609	4295	11869	11870	0.000417828	14796	14797	0.000351337	107833	107834	0.00251324	82	83	2.32619e-06	21411	21412	0.000465333	11316	11317	0.000263844	9132	9133	0.000240041
IMHIYATV	ATAATGCATATCTACGCCACGGTG	Pool 13	226	227	5.57874e-06	14	15	3.01066e-07	NA	1	2.21719e-08	39	40	7.96297e-07	NA	1	2.54725e-08	64	230	231	8.13127e-06	426	427	1.01386e-05	23	24	5.59357e-07	2	3	8.40791e-08	NA	1	2.17323e-08	2	3	6.99419e-08	3610	3611	9.49074e-05
IMHLVPVL	ATAATGCACCTCGTACCAGTGCTA	Pool 13	1320	1321	3.24648e-05	NA	1	2.00711e-08	563	564	1.2505e-05	3	4	7.96297e-08	112	113	2.87839e-06	493.5	602	603	2.12258e-05	1129	1130	2.68305e-05	1	2	4.66131e-08	4	5	1.40132e-07	19	20	4.34647e-07	1	2	4.66279e-08	2	3	7.88485e-08
IMIRSIFL	ATTATGATTCGCTCTATCTTTCTT	Pool 13	19377	19378	0.000476233	11115	11116	0.00022311	25814	25815	0.000572368	30962	30963	0.000616394	8605	8606	0.000219216	3769	16163	16164	0.000568978	20619	20620	0.000489597	63083	63084	0.00147027	3485	3486	9.76999e-05	26886	26887	0.000584317	2537	2538	5.91708e-05	131921	131922	0.00346729
IMITNFEL	ATAATGATTACCAATTTCGAGCTG	Pool 13	3797	3798	9.33395e-05	266	267	5.35897e-06	128	129	2.86018e-06	5372	5373	0.000106963	939	940	2.39442e-05	1330	2971	2972	0.000104615	4417	4418	0.0001049	824	825	1.92279e-05	22	23	6.44606e-07	4556	4557	9.90343e-05	952	953	2.22182e-05	14784	14785	0.000388592
IMLDYLDL	ATTATGCTGGATTACTTAGATCTG	Pool 13	7680	7681	0.000188768	392	393	7.88793e-06	39762	39763	0.000881622	5098	5099	0.000101508	23113	23114	0.000588772	4653	5689	5690	0.00020029	7982	7983	0.000189547	658	659	1.5359e-05	2432	2433	6.81882e-05	1594	1595	3.46631e-05	21228	21229	0.000494932	4256	4257	0.000111886
IMLFCLGL	ATAATGTTGTTCTGCTTAGGTCTC	Pool 13	9880	9881	0.000242835	7651	7652	0.000153584	21333	21334	0.000473016	9060	9061	0.000180381	4670	4671	0.000118982	2996	7819	7820	0.000275266	10155	10156	0.000241142	8409	8410	0.000196008	8712	8713	0.000244194	23419	23420	0.000508971	18652	18653	0.000434875	1670	1671	4.39186e-05
IMLLERTL	ATTATGCTTCTGGAACGTACACTA	Pool 13	6308	6309	0.00015505	3724	3725	7.47647e-05	16628	16629	0.000368697	15556	15557	0.0003097	1927	1928	4.9111e-05	1987.5	4388	4389	0.000154494	6985	6986	0.000165874	5879	5880	0.000137042	123	124	3.47527e-06	2077	2078	4.51598e-05	43439	43440	0.00101276	2061	2062	5.41952e-05
IMLSSASI	ATAATGCTGTCATCAGCTAGTATC	Pool 13	8273	8274	0.000203342	317	318	6.3826e-06	4247	4248	9.41863e-05	17806	17807	0.000354492	1452	1453	3.70116e-05	1722.5	4994	4995	0.000175826	7566	7567	0.000179669	12629	12630	0.000294361	12239	12240	0.000343043	3849	3850	8.36695e-05	1268	1269	2.95854e-05	3790	3791	9.96383e-05
IMLVLPSI	ATCATGTTGGTGCTTCCGAGCATA	Pool 13	11787	11788	0.000289701	6672	6673	0.000133934	1218	1219	2.70276e-05	1979	1980	3.94167e-05	4668	4669	0.000118931	2994.5	6844	6845	0.000240946	11088	11089	0.000263295	805	806	1.87851e-05	277	278	7.79133e-06	14005	14006	0.000304383	18202	18203	0.000424384	24508	24509	0.000644166
IMMVVAGF	ATTATGATGGTCGTCGCAGGGTTT	Pool 13	7477	7478	0.000183779	601	602	1.20828e-05	1138	1139	2.52538e-05	24329	24330	0.000484348	5406	5407	0.00013773	3180.5	4821	4822	0.000169736	7836	7837	0.00018608	504	505	1.17698e-05	28	29	8.12765e-07	307	308	6.69356e-06	3602	3603	8.40002e-05	5272	5273	0.000138589
IMNQYTEI	ATTATGAACCAATATACGGAGATC	Pool 13	1455	1456	3.57826e-05	NA	1	2.00711e-08	4	5	1.1086e-07	NA	1	1.99074e-08	814	815	2.07601e-05	1233	1241	1242	4.37188e-05	1816	1817	4.31425e-05	NA	1	2.33065e-08	176	177	4.96067e-06	11	12	2.60788e-07	2	3	6.99419e-08	29	30	7.88485e-07
IMRWLWQL	ATCATGCGGTGGTTGTGGCAGCTA	Pool 13	2314	2315	5.68934e-05	17167	17168	0.00034458	163	164	3.6362e-06	211	212	4.22037e-06	1654	1655	4.2157e-05	1835	995	996	3.50595e-05	2167	2168	5.14766e-05	95	96	2.23743e-06	38	39	1.09303e-06	47	48	1.04315e-06	4	5	1.1657e-07	8057	8058	0.000211787
IMTFRPSM	ATTATGACATTTCGTCCGTCTATG	Pool 13	5461	5462	0.000134234	747	748	1.50132e-05	2811	2812	6.23475e-05	36284	36285	0.000722341	1054	1055	2.68735e-05	1413.5	4463	4464	0.000157134	5810	5811	0.000137975	1562	1563	3.64281e-05	33	34	9.52897e-07	151	152	3.30332e-06	1140	1141	2.66012e-05	502	503	1.32203e-05
IMYNLIIV	ATCATGTATAATCTTATTATAGTG	Pool 13	4143	4144	0.000101843	712	713	1.43107e-05	48	49	1.08642e-06	549	550	1.09491e-05	824	825	2.10148e-05	1242	3603	3604	0.000126862	4743	4744	0.000112641	283	284	6.61905e-06	18	19	5.32501e-07	6388	6389	0.000138848	225	226	5.26896e-06	278	279	7.33291e-06
IMYYLSRI	ATCATGTATTACCTATCCCGGATA	Pool 13	6501	6502	0.000159793	15257	15258	0.000306244	1574	1575	3.49208e-05	7279	7280	0.000144926	6862	6863	0.000174818	3491	4233	4234	0.000149038	6659	6660	0.000158134	2786	2787	6.49553e-05	137	138	3.86764e-06	138	139	3.0208e-06	7956	7957	0.000185509	12008	12009	0.000315631
INALVHSL	ATCAACGCCTTAGTTCATAGTCTC	Pool 13	2825	2826	6.94517e-05	140	141	2.83002e-06	4982	4983	0.000110483	2792	2793	5.56014e-05	3107	3108	7.91686e-05	2516	2043	2044	7.19494e-05	2320	2321	5.51094e-05	637	638	1.48696e-05	8	9	2.52237e-07	408	409	8.88853e-06	40	41	9.55873e-07	1343	1344	3.53241e-05
INANYIDI	ATAAATGCCAATTATATCGACATT	Pool 13	3870	3871	9.51336e-05	1711	1712	3.43617e-05	571	572	1.26823e-05	453	454	9.03797e-06	2226	2227	5.67273e-05	2136	2154	2155	7.58567e-05	4002	4003	9.50464e-05	2243	2244	5.22998e-05	726	727	2.03752e-05	1899	1900	4.12914e-05	513	514	1.19834e-05	3130	3131	8.22916e-05
INEAYAAL	ATCAATGAGGCGTACGCAGCCCTG	Pool 13	330	331	8.13464e-06	5	6	1.20426e-07	2	3	6.65158e-08	4	5	9.95371e-08	2	3	7.64175e-08	162.5	189	190	6.68806e-06	287	288	6.83822e-06	3	4	9.32261e-08	6	7	1.96185e-07	2	3	6.5197e-08	169	170	3.96337e-06	8606	8607	0.000226216
INFDDAFL	ATTAACTTCGACGACGCGTTCCTG	Pool 13	1558	1559	3.83139e-05	632	633	1.2705e-05	25425	25426	0.000563743	947	948	1.88722e-05	11	12	3.0567e-07	247	1121	1122	3.94948e-05	1790	1791	4.25252e-05	1025	1026	2.39125e-05	504	505	1.41533e-05	24561	24562	0.00053379	434	435	1.01416e-05	109	110	2.89111e-06
INFNCRKL	ATCAACTTTAACTGCCGGAAGCTC	Pool 13	2694	2695	6.62322e-05	14	15	3.01066e-07	144	145	3.21493e-06	221	222	4.41945e-06	2103	2104	5.35942e-05	2077.5	1729	1730	6.08965e-05	2794	2795	6.63639e-05	62	63	1.46831e-06	211	212	5.94159e-06	656	657	1.42781e-05	52	53	1.23564e-06	1497	1498	3.93717e-05
INFNTRFV	ATTAACTTCAACACACGTTTCGTA	Pool 13	11352	11353	0.000279011	5289	5290	0.000106176	711	712	1.57864e-05	22471	22472	0.00044736	8566	8567	0.000218223	3767	6776	6777	0.000238553	11255	11256	0.00026726	17369	17370	0.000404834	387	388	1.08742e-05	4239	4240	9.21451e-05	5150	5151	0.00012009	14130	14131	0.000371403
INFTWINS	ATTAATTTTACTTGGATAAACTCG	Pool 13	1849	1850	4.54655e-05	632	633	1.2705e-05	444	445	9.86651e-06	588	589	1.17255e-05	1309	1310	3.3369e-05	1614	1704	1705	6.00165e-05	1841	1842	4.37361e-05	3287	3288	7.66319e-05	2087	2088	5.85191e-05	596	597	1.29742e-05	746	747	1.74155e-05	831	832	2.18673e-05
INFVRNTV	ATTAACTTTGTCCGAAATACTGTT	Pool 13	3565	3566	8.76379e-05	255	256	5.13819e-06	260	261	5.78687e-06	2342	2343	4.66431e-05	436	437	1.11315e-05	890	2600	2601	9.1556e-05	3475	3476	8.25335e-05	6814	6815	0.000158834	24	25	7.00659e-07	1572	1573	3.4185e-05	332	333	7.76355e-06	29	30	7.88485e-07
INHFSCDL	ATCAATCATTTTAGTTGTGACCTT	Pool 13	8079	8080	0.000198574	18238	18239	0.000366076	16254	16255	0.000360405	4696	4697	9.35052e-05	143131	143132	0.00364593	4999	5234	5235	0.000184274	8229	8230	0.000195412	6102	6103	0.00014224	51979	51980	0.00145681	3002	3003	6.52622e-05	6111	6112	0.000142495	20576	20577	0.000540822
INIFSSSF	ATTAATATATTTAGCTCGTCCTTT	Pool 13	4439	4440	0.000109117	1453	1454	2.91833e-05	1551	1552	3.44108e-05	835	836	1.66426e-05	9789	9790	0.000249376	3930	3376	3377	0.000118871	4004	4005	9.50939e-05	1288	1289	3.00421e-05	35886	35887	0.00100578	1184	1185	2.57528e-05	11	12	2.79768e-07	1810	1811	4.75982e-05
INIMLLSI	ATCAACATAATGCTACTTTCTATA	Pool 13	17814	17815	0.000437821	13565	13566	0.000272284	21891	21892	0.000485388	3204	3205	6.38033e-05	6794	6795	0.000173086	3479	13236	13237	0.000465947	19176	19177	0.000455335	40702	40703	0.000948646	7020	7021	0.000196773	36773	36774	0.000799185	15916	15917	0.000371088	12860	12861	0.000338024
INIVPFGI	ATCAACATAGTACCATTTGGTATT	Pool 13	2157	2158	5.30349e-05	2668	2669	5.35697e-05	3924	3925	8.70248e-05	1426	1427	2.84079e-05	2893	2894	7.37174e-05	2426	1344	1345	4.73444e-05	2207	2208	5.24263e-05	8	9	2.09759e-07	16255	16256	0.000455597	192	193	4.19434e-06	14	15	3.49709e-07	778	779	2.04743e-05
INLESQYL	ATAAATTTGGAATCGCAGTACTTG	Pool 13	8756	8757	0.000215212	1970	1971	3.95601e-05	31330	31331	0.000694669	4367	4368	8.69556e-05	8107	8108	0.000206531	3702.5	6443	6444	0.000226831	9767	9768	0.000231929	9354	9355	0.000218033	4828	4829	0.000135339	13601	13602	0.000295603	7796	7797	0.000181779	2952	2953	7.76132e-05
INLHELLL	ATAAATTTACATGAACTACTGCTA	Pool 13	5489	5490	0.000134922	2069	2070	4.15471e-05	7501	7502	0.000166334	629	630	1.25417e-05	1204	1205	3.06944e-05	1527	4381	4382	0.000154248	6091	6092	0.000144647	4184	4185	9.75378e-05	636	637	1.78528e-05	3610	3611	7.84755e-05	24593	24594	0.000573384	5401	5402	0.00014198
INLNLGIL	ATCAACTTAAATCTTGGGATACTG	Pool 13	3171	3172	7.7955e-05	127	128	2.5691e-06	1169	1170	2.59412e-05	1605	1606	3.19713e-05	6391	6392	0.00016282	3396	2422	2423	8.52904e-05	3482	3483	8.26997e-05	10494	10495	0.000244602	13	14	3.92369e-07	31	32	6.95435e-07	112	113	2.63448e-06	176	177	4.65206e-06
INLSFNVF	ATAAATCTGAGCTTCAATGTTTTC	Pool 13	11063	11064	0.000271908	2838	2839	5.69817e-05	14717	14718	0.000326326	20286	20287	0.000403862	5972	5973	0.000152147	3301	8203	8204	0.000288783	10413	10414	0.000247268	15912	15913	0.000370877	5408	5409	0.000151595	4821	4822	0.000104793	11643	11644	0.000271468	10390	10391	0.000273105
INLSSNRL	ATCAACCTTAGTAGTAACCGGTTA	Pool 13	4514	4515	0.00011096	42	43	8.63055e-07	12417	12418	0.000275331	731	732	1.45722e-05	1752	1753	4.46533e-05	1888	2582	2583	9.09224e-05	4432	4433	0.000105256	4532	4533	0.000105648	260	261	7.31488e-06	6	7	1.52126e-07	350	351	8.1832e-06	1303	1304	3.42728e-05
INNIFLYL	ATTAATAATATATTTCTCTACCTA	Pool 13	6942	6943	0.000170631	2755	2756	5.53158e-05	14433	14434	0.00032003	6814	6815	0.000135669	5467	5468	0.000139284	3197.5	5549	5550	0.000195362	6305	6306	0.000149728	1982	1983	4.62168e-05	249	250	7.00659e-06	4569	4570	9.93168e-05	10324	10325	0.000240717	4763	4764	0.000125211
INNIIFSL	ATAAACAATATCATCTTCTCTCTC	Pool 13	13129	13130	0.000322682	6131	6132	0.000123076	14992	14993	0.000332424	23369	23370	0.000465237	10203	10204	0.000259921	3979	11047	11048	0.000388893	13787	13788	0.00032738	5351	5352	0.000124737	317	318	8.91238e-06	5757	5758	0.000125135	2421	2422	5.64664e-05	6209	6210	0.000163216
INPICYAL	ATTAATCCGATTTGCTACGCTTTA	Pool 13	NA	1	2.4576e-08	NA	1	2.00711e-08	NA	1	2.21719e-08	NA	1	1.99074e-08	NA	1	2.54725e-08	64	NA	1	3.52003e-08	NA	1	2.37438e-08	NA	1	2.33065e-08	NA	1	2.80264e-08	NA	1	2.17323e-08	NA	1	2.3314e-08	NA	1	2.62828e-08
INPLLYRL	ATCAATCCTTTATTGTATCGGTTA	Pool 13	10195	10196	0.000250577	1794	1795	3.60275e-05	12045	12046	0.000267083	2206	2207	4.39357e-05	10344	10345	0.000263513	3996	7351	7352	0.000258793	11511	11512	0.000273339	19473	19474	0.000453871	965	966	2.70735e-05	3596	3597	7.81712e-05	21464	21465	0.000500434	16468	16469	0.000432852
INPRHTLI	ATAAATCCTAGACACACCTTAATA	Pool 13	3621	3622	8.90141e-05	5474	5475	0.000109889	47966	47967	0.00106352	590	591	1.17653e-05	565	566	1.44174e-05	1023	2359	2360	8.30727e-05	3957	3958	9.3978e-05	1705	1706	3.97609e-05	522	523	1.46578e-05	1674	1675	3.64017e-05	48353	48354	0.00112732	4997	4998	0.000131362
INQSFNAV	ATTAACCAATCATTCAACGCCGTT	Pool 13	2977	2978	7.31872e-05	13	14	2.80995e-07	7793	7794	0.000172808	2554	2555	5.08635e-05	760	761	1.93846e-05	1185	1988	1989	7.00134e-05	2498	2499	5.93358e-05	2698	2699	6.29043e-05	825	826	2.31498e-05	3104	3105	6.74789e-05	6833	6834	0.000159328	203	204	5.3617e-06
INQSLMTL	ATCAATCAATCCCTCATGACGCTA	Pool 13	1356	1357	3.33496e-05	1	2	4.01421e-08	1426	1427	3.16393e-05	108	109	2.16991e-06	150	151	3.84635e-06	548.5	475	476	1.67553e-05	1300	1301	3.08907e-05	483	484	1.12804e-05	5	6	1.68158e-07	60	61	1.32567e-06	NA	1	2.3314e-08	14	15	3.94243e-07
INRSFLSF	ATCAACAGATCCTTTCTGTCGTTT	Pool 13	5379	5380	0.000132219	1921	1922	3.85766e-05	2387	2388	5.29466e-05	7902	7903	0.000157328	4694	4695	0.000119593	3004	3894	3895	0.000137105	5926	5927	0.00014073	1838	1839	4.28607e-05	563	564	1.58069e-05	3514	3515	7.63892e-05	1047	1048	2.4433e-05	5396	5397	0.000141849
INRSLLAL	ATAAACCGGTCATTGCTTGCGCTT	Pool 13	7433	7434	0.000182698	4035	4036	8.10068e-05	1592	1593	3.53199e-05	8143	8144	0.000162126	171	172	4.38127e-06	579	3968	3969	0.00013971	6677	6678	0.000158561	491	492	1.14668e-05	367	368	1.03137e-05	2874	2875	6.24805e-05	402	403	9.39553e-06	11725	11726	0.000308193
INRTYFPF	ATCAATCGTACATACTTCCCGTTT	Pool 13	6740	6741	0.000165667	179	180	3.61279e-06	10878	10879	0.000241208	4426	4427	8.81302e-05	1571	1572	4.00428e-05	1791	4439	4440	0.000156289	6154	6155	0.000146143	15538	15539	0.00036216	1600	1601	4.48702e-05	3729	3730	8.10616e-05	193	194	4.52291e-06	2848	2849	7.48798e-05
INSRHPSL	ATAAATAGTCGTCACCCGTCCTTA	Pool 13	5278	5279	0.000129737	256	257	5.15826e-06	5349	5350	0.00011862	64	65	1.29398e-06	1496	1497	3.81323e-05	1747	3695	3696	0.0001301	6048	6049	0.000143626	2800	2801	6.52816e-05	15	16	4.48422e-07	809	810	1.76032e-05	470	471	1.09809e-05	4305	4306	0.000113174
INSYLKPM	ATCAATTCTTACTTAAAACCGATG	Pool 13	8556	8557	0.000210297	803	804	1.61371e-05	12980	12981	0.000287814	8292	8293	0.000165092	3984	3985	0.000101508	2797.5	6320	6321	0.000222501	8914	8915	0.000211676	3995	3996	9.31329e-05	4286	4287	0.000120149	5816	5817	0.000126417	9576	9577	0.000223278	11372	11373	0.000298915
INTYRGLL	ATAAACACTTACCGCGGGTTGCTG	Pool 13	851	852	2.09387e-05	2	3	6.02132e-08	107	108	2.39457e-06	3202	3203	6.37635e-05	68	69	1.7576e-06	408	483	484	1.7037e-05	865	866	2.05621e-05	1187	1188	2.76882e-05	5	6	1.68158e-07	1	2	4.34647e-08	NA	1	2.3314e-08	1436	1437	3.77684e-05
INVEFPVV	ATCAACGTTGAATTCCCGGTGGTA	Pool 13	2070	2071	5.08968e-05	2112	2113	4.24101e-05	6	7	1.55203e-07	277	278	5.53426e-06	480	481	1.22523e-05	936.5	1341	1342	4.72388e-05	2508	2509	5.95732e-05	2389	2390	5.57026e-05	13	14	3.92369e-07	102	103	2.23843e-06	249	250	5.82849e-06	22	23	6.04505e-07
INVTGYYL	ATTAACGTAACAGGATATTATCTC	Pool 13	4445	4446	0.000109265	86	87	1.74618e-06	1109	1110	2.46108e-05	1933	1934	3.8501e-05	2120	2121	5.40272e-05	2083.5	2712	2713	9.54985e-05	4247	4248	0.000100864	3130	3131	7.29727e-05	10	11	3.0829e-07	6337	6338	0.00013774	2035	2036	4.74672e-05	2298	2299	6.04243e-05
INWIQQVL	ATCAATTGGATACAACAAGTCCTT	Pool 13	4988	4989	0.000122609	222	223	4.47585e-06	4619	4620	0.000102434	2154	2155	4.29005e-05	1382	1383	3.52285e-05	1674	3025	3026	0.000106516	5176	5177	0.000122922	941	942	2.19547e-05	3191	3192	8.94602e-05	145	146	3.17292e-06	68387	68388	0.0015944	2475	2476	6.50763e-05
INYADYTL	ATAAACTACGCGGACTACACACTA	Pool 13	3341	3342	8.21329e-05	4691	4692	9.41734e-05	53633	53634	0.00118917	981	982	1.95491e-05	2687	2688	6.84701e-05	2344	2326	2327	8.19111e-05	3136	3137	7.44843e-05	5800	5801	0.000135201	129	130	3.64343e-06	189	190	4.12914e-06	111	112	2.61116e-06	1193	1194	3.13817e-05
INYLMLFI	ATTAATTACTTAATGCTCTTTATA	Pool 13	7914	7915	0.000194519	898	899	1.80439e-05	3491	3492	7.74244e-05	371	372	7.40556e-06	4219	4220	0.000107494	2858	5895	5896	0.000207541	7229	7230	0.000171668	9094	9095	0.000211973	1789	1790	5.01672e-05	6487	6488	0.000140999	66	67	1.56204e-06	8267	8268	0.000217307
INYNHKFI	ATCAACTATAATCACAAATTTATA	Pool 13	5942	5943	0.000146055	362	363	7.28579e-06	3268	3269	7.248e-05	1541	1542	3.06972e-05	1324	1325	3.37511e-05	1629	4206	4207	0.000148088	5661	5662	0.000134437	1665	1666	3.88287e-05	6459	6460	0.00018105	3909	3910	8.49735e-05	904	905	2.10991e-05	3231	3232	8.49462e-05
INYSIIVI	ATTAATTACTCGATCATCGTTATT	Pool 13	13342	13343	0.000327917	3042	3043	6.10762e-05	2689	2690	5.96425e-05	4518	4519	8.99617e-05	6331	6332	0.000161292	3382	10281	10282	0.00036193	13982	13983	0.00033201	17965	17966	0.000418725	16024	16025	0.000449123	12066	12067	0.000262244	8848	8849	0.000206305	16210	16211	0.000426071
INYSLIEI	ATTAATTACTCATTAATAGAAATC	Pool 13	9593	9594	0.000235782	7290	7291	0.000146338	8535	8536	0.00018926	2985	2986	5.94436e-05	5572	5573	0.000141958	3220	6133	6134	0.000215919	7874	7875	0.000186982	2449	2450	5.7101e-05	381	382	1.07061e-05	2615	2616	5.68518e-05	21827	21828	0.000508897	2641	2642	6.94393e-05
INYTDCHI	ATTAATTATACAGATTGCCACATA	Pool 13	9556	9557	0.000234872	3583	3584	7.19347e-05	9739	9740	0.000215955	3806	3807	7.57876e-05	21281	21282	0.000542106	4595	7000	7001	0.000246437	9771	9772	0.000232024	7842	7843	0.000182793	43	44	1.23316e-06	2420	2421	5.2614e-05	33961	33962	0.000791789	9629	9630	0.000253104
INYYKFSS	ATTAATTACTACAAATTCTCATCC	Pool 13	5761	5762	0.000141607	5228	5229	0.000104952	807	808	1.79149e-05	8993	8994	0.000179047	4289	4290	0.000109277	2875	4199	4200	0.000147841	5396	5397	0.000128145	12048	12049	0.00028082	5288	5289	0.000148231	9143	9144	0.000198721	2953	2954	6.88695e-05	1665	1666	4.37872e-05
IPALYNNL	ATTCCAGCCCTATACAACAATCTT	Pool 13	3765	3766	9.25531e-05	6676	6677	0.000134014	3667	3668	8.13266e-05	1097	1098	2.18584e-05	6819	6820	0.000173723	3481	2784	2785	9.80329e-05	3849	3850	9.14136e-05	453	454	1.05812e-05	63	64	1.79369e-06	116	117	2.54268e-06	441	442	1.03048e-05	3661	3662	9.62478e-05
IPFFYMTA	ATACCGTTCTTTTACATGACAGCT	Pool 13	11984	11985	0.000294543	35274	35275	0.000708007	6017	6018	0.000133431	3283	3284	6.5376e-05	36397	36398	0.000927148	4847	8263	8264	0.000290895	13705	13706	0.000325433	14453	14454	0.000336873	5420	5421	0.000151931	3387	3388	7.36292e-05	10294	10295	0.000240017	18814	18815	0.000494512
IPFLKANL	ATTCCCTTCCTCAAAGCTAATCTC	Pool 13	7456	7457	0.000183263	4545	4546	9.1243e-05	13678	13679	0.00030329	2196	2197	4.37366e-05	8831	8832	0.000224973	3802	6131	6132	0.000215848	8275	8276	0.000196504	2331	2332	5.43508e-05	40	41	1.14908e-06	5886	5887	0.000127938	221	222	5.1757e-06	7149	7150	0.000187922
IPFYIQAL	ATTCCGTTTTATATTCAGGCTTTA	Pool 13	30605	30606	0.000752172	18287	18288	0.00036706	24155	24156	0.000535585	31961	31962	0.000636281	19879	19880	0.000506393	4550	23159	23160	0.000815239	31899	31900	0.000757427	14124	14125	0.000329205	7517	7518	0.000210702	16105	16106	0.000350021	12835	12836	0.000299258	23145	23146	0.000608343
IPIFLMYL	ATTCCAATATTCCTGATGTATTTA	Pool 13	8969	8970	0.000220446	1900	1901	3.81551e-05	28893	28894	0.000640636	7511	7512	0.000149545	3942	3943	0.000100438	2783	6660	6661	0.000234469	9431	9432	0.000223952	32424	32425	0.000755714	4455	4456	0.000124885	7263	7264	0.000157864	13687	13688	0.000319122	6227	6228	0.00016369
IPLLFKML	ATTCCACTATTGTTCAAGATGCTC	Pool 13	5479	5480	0.000134676	2938	2939	5.89888e-05	904	905	2.00656e-05	3775	3776	7.51704e-05	5904	5905	0.000150415	3289	3856	3857	0.000135768	5988	5989	0.000142202	1307	1308	3.04849e-05	1216	1217	3.41081e-05	1324	1325	2.87954e-05	10	11	2.56454e-07	25714	25715	0.000675863
IPNIYAAL	ATTCCTAATATATATGCTGCATTG	Pool 13	9560	9561	0.000234971	24274	24275	0.000487225	2862	2863	6.34782e-05	1416	1417	2.82088e-05	872	873	2.22375e-05	1280	8144	8145	0.000286707	10395	10396	0.000246841	7251	7252	0.000169019	278	279	7.81936e-06	11656	11657	0.000253334	5828	5829	0.000135897	1883	1884	4.95169e-05
IPVFAAML	ATACCGGTATTTGCCGCGATGCTG	Pool 13	6145	6146	0.000151044	566	567	1.13803e-05	7141	7142	0.000158352	817	818	1.62843e-05	8344	8345	0.000212568	3738	4018	4019	0.00014147	6086	6087	0.000144529	120	121	2.82009e-06	454	455	1.2752e-05	7911	7912	0.000171946	680	681	1.58768e-05	593	594	1.5612e-05
IQFGFATL	ATACAGTTCGGATTTGCAACTCTA	Pool 13	23988	23989	0.000589553	7082	7083	0.000142163	9448	9449	0.000209503	6054	6055	0.000120539	19844	19845	0.000505502	4546	15059	15060	0.000530117	24136	24137	0.000573104	11337	11338	0.000264249	519	520	1.45737e-05	18329	18330	0.000398354	14695	14696	0.000342622	10476	10477	0.000275365
IQFHYGGC	ATACAGTTCCATTATGGTGGGTGT	Pool 13	2106	2107	5.17816e-05	810	811	1.62776e-05	2791	2792	6.1904e-05	414	415	8.26158e-06	2763	2764	7.0406e-05	2383	1221	1222	4.30148e-05	2319	2320	5.50856e-05	4	5	1.16533e-07	6	7	1.96185e-07	505	506	1.09966e-05	4	5	1.1657e-07	238	239	6.2816e-06
IQFIQSYF	ATTCAGTTTATCCAAAGCTACTTC	Pool 13	5254	5255	0.000129147	2275	2276	4.56817e-05	2776	2777	6.15714e-05	853	854	1.70009e-05	4286	4287	0.000109201	2873	4603	4604	0.000162062	6299	6300	0.000149586	2830	2831	6.59808e-05	343	344	9.64107e-06	2621	2622	5.69822e-05	331	332	7.74024e-06	10319	10320	0.000271239
IQFLISLV	ATCCAATTCCTAATCAGCCTCGTT	Pool 13	3998	3999	9.82793e-05	4713	4714	9.4615e-05	572	573	1.27045e-05	3796	3797	7.55885e-05	6500	6501	0.000165597	3422	3456	3457	0.000121687	4672	4673	0.000110955	1377	1378	3.21164e-05	63	64	1.79369e-06	493	494	1.07358e-05	171	172	4.01e-06	2963	2964	7.79024e-05
IQFLLAAV	ATCCAATTCTTATTAGCAGCCGTA	Pool 13	8344	8345	0.000205086	2868	2869	5.75839e-05	17304	17305	0.000383685	1615	1616	3.21704e-05	3764	3765	9.5904e-05	2722	5703	5704	0.000200783	8272	8273	0.000196432	2053	2054	4.78716e-05	117	118	3.30711e-06	8707	8708	0.000189245	2786	2787	6.4976e-05	18126	18127	0.000476429
IQFSAGSV	ATACAGTTTTCGGCGGGCTCTGTA	Pool 13	8863	8864	0.000217841	4562	4563	9.15842e-05	6868	6869	0.000152299	9957	9958	0.000198238	2411	2412	6.14397e-05	2222.5	5160	5161	0.000181669	7554	7555	0.000179384	136	137	3.19299e-06	843	844	2.36543e-05	745	746	1.62123e-05	922	923	2.15188e-05	2597	2598	6.82828e-05
IQFTHCLV	ATTCAATTTACCCACTGTCTAGTT	Pool 13	18997	18998	0.000466894	4181	4182	8.39372e-05	106263	106264	0.00235608	13802	13803	0.000274782	16522	16523	0.000420882	4419.5	13483	13484	0.000474641	19870	19871	0.000471813	31677	31678	0.000738304	613	614	1.72082e-05	30560	30561	0.000664162	11231	11232	0.000261862	3464	3465	9.10701e-05
IQFVYHLI	ATCCAGTTCGTCTATCACCTAATA	Pool 13	8120	8121	0.000199581	3785	3786	7.5989e-05	2882	2883	6.39217e-05	808	809	1.61051e-05	7090	7091	0.000180626	3555	5322	5323	0.000187371	8516	8517	0.000202226	14369	14370	0.000334915	412	413	1.15749e-05	647	648	1.40826e-05	1337	1338	3.11941e-05	6158	6159	0.000161876
IQIFRAHL	ATTCAAATCTTTCGAGCTCACCTG	Pool 13	6760	6761	0.000166158	4650	4651	9.33505e-05	5286	5287	0.000117223	483	484	9.63519e-06	71	72	1.83402e-06	417	4324	4325	0.000152241	7269	7270	0.000172617	5099	5100	0.000118863	4555	4556	0.000127688	1454	1455	3.16206e-05	3452	3453	8.05031e-05	849	850	2.23404e-05
IQKMFEKL	ATTCAGAAAATGTTCGAGAAACTG	Pool 13	2487	2488	6.1145e-05	5075	5076	0.000101881	1545	1546	3.42778e-05	8502	8503	0.000169273	855	856	2.18045e-05	1263	1634	1635	5.75525e-05	3425	3426	8.13463e-05	815827	815828	0.0190141	539	540	1.51342e-05	1956	1957	4.25302e-05	2139	2140	4.98919e-05	231	232	6.09762e-06
IQLLCYLL	ATCCAATTGCTCTGTTATCTGTTG	Pool 13	35490	35491	0.000872226	3845	3846	7.71933e-05	42129	42130	0.000934103	18211	18212	0.000362554	10205	10206	0.000259972	3980	26607	26608	0.00093661	39155	39156	0.000929712	11921	11922	0.00027786	2641	2642	7.40457e-05	24842	24843	0.000539897	29098	29099	0.000678413	11962	11963	0.000314422
IQMAKFRI	ATCCAGATGGCCAAATTTCGCATA	Pool 13	1976	1977	4.85867e-05	1421	1422	2.8541e-05	692	693	1.53651e-05	2	3	5.97223e-08	259	260	6.62285e-06	679.5	957	958	3.37219e-05	1721	1722	4.08868e-05	6	7	1.63146e-07	4	5	1.40132e-07	677	678	1.47345e-05	318	319	7.43715e-06	5	6	1.57697e-07
IQMYFLLL	ATACAAATGTACTTCCTGTTGTTA	Pool 13	11461	11462	0.00028169	3151	3152	6.3264e-05	790	791	1.7538e-05	8320	8321	0.00016565	4858	4859	0.000123771	3037.5	6968	6969	0.000245311	11821	11822	0.000280699	7384	7385	0.000172119	512	513	1.43775e-05	4560	4561	9.91212e-05	2370	2371	5.52774e-05	10184	10185	0.000267691
IQQVLAPL	ATTCAGCAAGTGCTGGCGCCGTTG	Pool 13	2645	2646	6.5028e-05	25	26	5.21847e-07	439	440	9.75565e-06	298	299	5.95232e-06	427	428	1.09022e-05	879.5	1582	1583	5.57221e-05	2911	2912	6.9142e-05	862	863	2.01135e-05	60	61	1.70961e-06	1236	1237	2.68829e-05	308	309	7.20402e-06	342	343	9.01502e-06
IQTMHSNL	ATCCAGACAATGCATTCAAATCTA	Pool 13	3099	3100	7.61855e-05	4497	4498	9.02796e-05	1136	1137	2.52095e-05	402	403	8.02269e-06	744	745	1.8977e-05	1170	1856	1857	6.5367e-05	3320	3321	7.88532e-05	719	720	1.67807e-05	43	44	1.23316e-06	3282	3283	7.13473e-05	2	3	6.99419e-08	870	871	2.28924e-05
IQVLFTAV	ATTCAGGTTTTGTTTACAGCCGTT	Pool 13	27221	27222	0.000669007	7334	7335	0.000147221	18762	18763	0.000416012	12779	12780	0.000254417	20617	20618	0.000525192	4578	17809	17810	0.000626918	26823	26824	0.000636904	36668	36669	0.000854627	23749	23750	0.000665626	64452	64453	0.00140071	12141	12142	0.000283078	26293	26294	0.000691081
IQWIRHHV	ATACAGTGGATTAGGCATCATGTA	Pool 13	2862	2863	7.0361e-05	77	78	1.56554e-06	2039	2040	4.52307e-05	1029	1030	2.05046e-05	504	505	1.28636e-05	958.5	1596	1597	5.62149e-05	2816	2817	6.68863e-05	796	797	1.85753e-05	1365	1366	3.8284e-05	1888	1889	4.10524e-05	42	43	1.0025e-06	155	156	4.10012e-06
IQYKKAQL	ATTCAATACAAGAAAGCTCAATTG	Pool 13	3243	3244	7.97244e-05	5593	5594	0.000112277	2342	2343	5.19488e-05	2253	2254	4.48713e-05	523	524	1.33476e-05	984.5	2261	2262	7.96231e-05	3736	3737	8.87306e-05	21	22	5.12744e-07	66215	66216	0.00185579	9684	9685	0.000210478	1077	1078	2.51325e-05	435	436	1.14593e-05
IQYRDANL	ATACAATACAGGGATGCCAACCTC	Pool 13	1471	1472	3.61758e-05	4	5	1.00355e-07	1	2	4.43439e-08	469	470	9.35649e-06	3306	3307	8.42376e-05	2584	892	893	3.14339e-05	1447	1448	3.4381e-05	4	5	1.16533e-07	NA	1	2.80264e-08	6	7	1.52126e-07	NA	1	2.3314e-08	146	147	3.86358e-06
IRYALLLL	ATTCGCTATGCATTGCTTCTGCTA	Pool 13	8744	8745	0.000214917	4719	4720	9.47354e-05	13754	13755	0.000304975	2463	2464	4.90519e-05	2102	2103	5.35687e-05	2076	5463	5464	0.000192335	7882	7883	0.000187172	14098	14099	0.000328599	378	379	1.0622e-05	12653	12654	0.000275001	171	172	4.01e-06	3071	3072	8.07409e-05
ISAALALM	ATTTCAGCCGCATTAGCCCTCATG	Pool 13	6909	6910	0.00016982	717	718	1.4411e-05	285	286	6.34117e-06	13560	13561	0.000269965	5911	5912	0.000150593	3290	3268	3269	0.00011507	6533	6534	0.000155142	4264	4265	9.94023e-05	14453	14454	0.000405093	84	85	1.84725e-06	8129	8130	0.000189543	1943	1944	5.10939e-05
ISAFLAVF	ATCAGCGCATTCCTAGCTGTGTTC	Pool 13	3854	3855	9.47403e-05	24	25	5.01776e-07	21415	21416	0.000474834	2014	2015	4.01135e-05	5889	5890	0.000150033	3285	2355	2356	8.29319e-05	3838	3839	9.11525e-05	2	3	6.99196e-08	296	297	8.32383e-06	330	331	7.19341e-06	5252	5253	0.000122468	6344	6345	0.000166765
ISAKSHNL	ATATCGGCCAAGTCACATAACCTA	Pool 13	1986	1987	4.88324e-05	233	234	4.69663e-06	97	98	2.17285e-06	427	428	8.52038e-06	13541	13542	0.000344949	4269	1172	1173	4.129e-05	2377	2378	5.64628e-05	2279	2280	5.31389e-05	10	11	3.0829e-07	7	8	1.73859e-07	3	4	9.32559e-08	63	64	1.6821e-06
ISALSSGL	ATTAGCGCACTCTCATCGGGCCTG	Pool 13	658	659	1.61956e-05	23	24	4.81705e-07	414	415	9.20135e-06	NA	1	1.99074e-08	732	733	1.86713e-05	1162	424	425	1.49601e-05	769	770	1.82827e-05	2	3	6.99196e-08	NA	1	2.80264e-08	2	3	6.5197e-08	1017	1018	2.37336e-05	26	27	7.09637e-07
ISALWEGL	ATCTCTGCCCTGTGGGAGGGATTA	Pool 13	14096	14097	0.000346447	3728	3729	7.4845e-05	22669	22670	0.000502638	16892	16893	0.000336296	2689	2690	6.85211e-05	2345.5	9224	9225	0.000324723	13586	13587	0.000322607	30288	30289	0.000705931	1737	1738	4.87098e-05	10987	10988	0.000238795	1208	1209	2.81866e-05	6294	6295	0.000165451
ISAQIGTL	ATTAGCGCCCAGATCGGGACGTTG	Pool 13	1011	1012	2.48709e-05	2	3	6.02132e-08	NA	1	2.21719e-08	2	3	5.97223e-08	NA	1	2.54725e-08	64	538	539	1.8973e-05	725	726	1.7238e-05	347	348	8.11067e-06	NA	1	2.80264e-08	20	21	4.56379e-07	NA	1	2.3314e-08	4	5	1.31414e-07
ISASRWLL	ATCTCTGCATCGAGATGGCTATTA	Pool 13	11371	11372	0.000279478	2774	2775	5.56972e-05	8926	8927	0.000197929	22228	22229	0.000442522	37714	37715	0.000960696	4855	6740	6741	0.000237285	11369	11370	0.000269967	4803	4804	0.000111965	8558	8559	0.000239878	9313	9314	0.000202415	15254	15255	0.000355655	3479	3480	9.14643e-05
ISAYRKLL	ATTTCAGCCTACCGAAAGTTGCTA	Pool 13	2806	2807	6.89847e-05	3195	3196	6.41471e-05	37263	37264	0.000826215	2056	2057	4.09496e-05	484	485	1.23542e-05	945	2073	2074	7.30054e-05	3304	3305	7.84733e-05	10	11	2.56372e-07	117	118	3.30711e-06	1523	1524	3.31201e-05	53	54	1.25895e-06	4317	4318	0.000113489
ISCSFGSV	ATATCGTGCTCTTTTGGATCCGTC	Pool 13	28986	28987	0.000712383	273070	273071	0.00548082	4413	4414	9.78669e-05	20738	20739	0.00041286	69378	69379	0.00176726	4961	19119	19120	0.00067303	29549	29550	0.000701629	228434	228435	0.00532403	6914	6915	0.000193802	20848	20849	0.000453098	6511	6512	0.000151821	20726	20727	0.000544765
ISDFLAFL	ATTAGTGATTTTCTCGCGTTCCTC	Pool 13	11616	11617	0.000285499	1568	1569	3.14915e-05	10225	10226	0.00022673	5197	5198	0.000103479	2401	2402	6.1185e-05	2217	9425	9426	0.000331798	11444	11445	0.000271748	22546	22547	0.000525492	283	284	7.95949e-06	7896	7897	0.00017162	1861	1862	4.34106e-05	40954	40955	0.00107641
ISDLLFLL	ATCTCTGACCTTCTCTTCCTACTC	Pool 13	12846	12847	0.000315727	5184	5185	0.000104068	26219	26220	0.000581348	29548	29549	0.000588244	8304	8305	0.000211549	3733	9283	9284	0.0003268	12829	12830	0.000304633	20423	20424	0.000476012	2598	2599	7.28405e-05	43173	43174	0.000938272	18533	18534	0.000432101	7494	7495	0.00019699
ISDRLVTL	ATATCAGACAGACTCGTGACACTG	Pool 13	1143	1144	2.81149e-05	12	13	2.60924e-07	3	4	8.86877e-08	56	57	1.13472e-06	2	3	7.64175e-08	162.5	995	996	3.50595e-05	1371	1372	3.25765e-05	197	198	4.61469e-06	4	5	1.40132e-07	224	225	4.88978e-06	NA	1	2.3314e-08	339	340	8.93617e-06
ISDSFFFL	ATCAGCGATTCTTTCTTCTTCTTA	Pool 13	14328	14329	0.000352149	3826	3827	7.68119e-05	24339	24340	0.000539665	11980	11981	0.000238511	11316	11317	0.000288272	4098	11220	11221	0.000394983	15093	15094	0.000358389	10780	10781	0.000251268	4421	4422	0.000123933	13939	13940	0.000302949	12401	12402	0.00028914	9427	9428	0.000247795
ISEYYGML	ATCAGTGAATATTATGGGATGCTT	Pool 13	3630	3631	8.92353e-05	716	717	1.43909e-05	4413	4414	9.78669e-05	804	805	1.60255e-05	13839	13840	0.00035254	4284	3021	3022	0.000106375	5075	5076	0.000120524	1479	1480	3.44937e-05	699	700	1.96185e-05	3285	3286	7.14125e-05	31	32	7.46047e-07	841	842	2.21302e-05
ISFCNSGL	ATATCCTTCTGTAACAGTGGCCTC	Pool 13	175	176	4.32537e-06	NA	1	2.00711e-08	NA	1	2.21719e-08	10	11	2.18982e-07	163	164	4.17749e-06	568.5	165	166	5.84325e-06	239	240	5.69851e-06	NA	1	2.33065e-08	NA	1	2.80264e-08	NA	1	2.17323e-08	NA	1	2.3314e-08	117	118	3.10138e-06
ISFCPTDL	ATCTCTTTCTGTCCTACAGATCTC	Pool 13	7482	7483	0.000183902	3188	3189	6.40066e-05	17103	17104	0.000379229	3924	3925	7.81366e-05	4857	4858	0.000123745	3036	6242	6243	0.000219756	7952	7953	0.000188834	9589	9590	0.00022351	5080	5081	0.000142402	10319	10320	0.000224278	2214	2215	5.16404e-05	2694	2695	7.08323e-05
ISFENVSF	ATCTCTTTTGAGAATGTAAGCTTC	Pool 13	6284	6285	0.00015446	1929	1930	3.87371e-05	3702	3703	8.21026e-05	2700	2701	5.377e-05	6126	6127	0.00015607	3337.5	5406	5407	0.000190328	6181	6182	0.000146784	5528	5529	0.000128862	260	261	7.31488e-06	246	247	5.36789e-06	4504	4505	0.000105029	1877	1878	4.93592e-05
ISFGCCMM	ATTTCGTTTGGTTGTTGCATGATG	Pool 13	12405	12406	0.000304889	2832	2833	5.68613e-05	2150	2151	4.76918e-05	15497	15498	0.000308525	9841	9842	0.0002507	3936	9191	9192	0.000323561	13183	13184	0.000313038	13345	13346	0.000311049	576	577	1.61712e-05	1630	1631	3.54454e-05	13924	13925	0.000324647	9485	9486	0.000249319
ISFIDYFI	ATTTCCTTCATCGACTATTTCATA	Pool 13	28104	28105	0.000690707	24280	24281	0.000487345	23818	23819	0.000528113	22683	22684	0.00045158	10105	10106	0.000257425	3973	21054	21055	0.000741143	30792	30793	0.000731143	47317	47318	0.00110282	100039	100040	0.00280376	10439	10440	0.000226886	37355	37356	0.000870916	30035	30036	0.000789432
ISFIFKYN	ATCTCTTTTATTTTCAAATACAAT	Pool 13	6323	6324	0.000155418	3415	3416	6.85627e-05	9407	9408	0.000208593	2029	2030	4.04121e-05	7467	7468	0.000190229	3622	5249	5250	0.000184802	6024	6025	0.000143056	15795	15796	0.00036815	14714	14715	0.000412408	67226	67227	0.001461	340	341	7.95006e-06	1889	1890	4.96746e-05
ISFIVLMI	ATAAGTTTTATCGTCCTCATGATA	Pool 13	18192	18193	0.00044711	4775	4776	9.58594e-05	8486	8487	0.000188173	53568	53569	0.00106642	8346	8347	0.000212619	3739	12881	12882	0.00045345	18155	18156	0.000431092	49691	49692	0.00115815	6424	6425	0.000180069	18385	18386	0.000399571	7813	7814	0.000182175	11270	11271	0.000296234
ISFLGART	ATATCGTTCCTAGGAGCCCGAACC	Pool 13	4015	4016	9.86971e-05	27	28	5.6199e-07	1269	1270	2.81583e-05	386	387	7.70417e-06	1907	1908	4.86015e-05	1982	2468	2469	8.69096e-05	3812	3813	9.05351e-05	1802	1803	4.20217e-05	189	190	5.32501e-06	13	14	3.04253e-07	22	23	5.36221e-07	1713	1714	4.50488e-05
ISFLGCIM	ATAAGTTTTCTAGGTTGCATTATG	Pool 13	15859	15860	0.000389775	4242	4243	8.51615e-05	7250	7251	0.000160769	11149	11150	0.000221968	4358	4359	0.000111035	2903	12844	12845	0.000452148	15420	15421	0.000366153	7342	7343	0.00017114	10892	10893	0.000305291	17942	17943	0.000389943	5511	5512	0.000128507	11552	11553	0.000303646
ISFLILPM	ATTAGTTTTCTTATACTTCCAATG	Pool 13	8050	8051	0.000197861	16275	16276	0.000326677	4806	4807	0.00010658	7410	7411	0.000147534	23294	23295	0.000593382	4656	6704	6705	0.000236018	7771	7772	0.000184537	2751	2752	6.41396e-05	72	73	2.04592e-06	14838	14839	0.000322486	8676	8677	0.000202295	3164	3165	8.31852e-05
ISFLLRSC	ATCTCCTTTCTGCTCCGATCGTGT	Pool 13	6346	6347	0.000155984	566	567	1.13803e-05	2332	2333	5.17271e-05	1915	1916	3.81426e-05	5403	5404	0.000137653	3179	4721	4722	0.000166216	8289	8290	0.000196836	6136	6137	0.000143032	1831	1832	5.13443e-05	20043	20044	0.000435603	4379	4380	0.000102115	4154	4155	0.000109205
ISFLNSFC	ATTTCCTTCTTAAATTCATTTTGC	Pool 13	23087	23088	0.00056741	27817	27818	0.000558337	50204	50205	0.00111314	23217	23218	0.000462211	96624	96625	0.00246128	4982	17611	17612	0.000619948	22870	22871	0.000543045	20055	20056	0.000467436	19896	19897	0.000557641	32336	32337	0.000702759	38294	38295	0.000892808	25323	25324	0.000665587
ISFQGCVV	ATCTCGTTTCAGGGATGTGTTGTG	Pool 13	4657	4658	0.000114475	920	921	1.84854e-05	291	292	6.4742e-06	4648	4649	9.25496e-05	184	185	4.71241e-06	594	2865	2866	0.000100884	4111	4112	9.76345e-05	6	7	1.63146e-07	506	507	1.42094e-05	5941	5942	0.000129134	2	3	6.99419e-08	1246	1247	3.27747e-05
ISFRGLFI	ATCTCTTTTCGAGGGCTGTTTATT	Pool 13	14128	14129	0.000347234	15245	15246	0.000306003	4666	4667	0.000103476	14999	15000	0.000298611	6101	6102	0.000155433	3329	11294	11295	0.000397588	15166	15167	0.000360122	13422	13423	0.000312844	4659	4660	0.000130603	38979	38980	0.000847127	3045	3046	7.10143e-05	11489	11490	0.00030199
ISFRRVAC	ATATCTTTCCGGCGAGTGGCATGT	Pool 13	2666	2667	6.55441e-05	1096	1097	2.2018e-05	1736	1737	3.85126e-05	4796	4797	9.54959e-05	1260	1261	3.21208e-05	1570	1317	1318	4.6394e-05	2396	2397	5.69139e-05	1802	1803	4.20217e-05	7	8	2.24211e-07	463	464	1.00838e-05	1654	1655	3.85846e-05	515	516	1.35619e-05
ISFRSCAA	ATCAGTTTCCGCTCGTGTGCGGCA	Pool 13	147	148	3.63724e-06	NA	1	2.00711e-08	NA	1	2.21719e-08	NA	1	1.99074e-08	3717	3718	9.47068e-05	2709.5	98	99	3.48483e-06	138	139	3.30039e-06	NA	1	2.33065e-08	NA	1	2.80264e-08	2	3	6.5197e-08	2	3	6.99419e-08	2	3	7.88485e-08
ISFSETAL	ATCAGCTTTTCCGAGACGGCGCTA	Pool 13	2990	2991	7.35067e-05	3	4	8.02842e-08	200	201	4.45656e-06	2619	2620	5.21575e-05	1741	1742	4.43731e-05	1880.5	1929	1930	6.79366e-05	2423	2424	5.7555e-05	1025	1026	2.39125e-05	5975	5976	0.000167486	5327	5328	0.00011579	176	177	4.12657e-06	173	174	4.57322e-06
ISFSILGL	ATATCCTTTAGCATACTAGGATTG	Pool 13	52790	52791	0.00129739	15202	15203	0.00030514	34096	34097	0.000755996	29695	29696	0.000591171	50537	50538	0.00128733	4929	33470	33471	0.00117819	50767	50768	0.00120543	33535	33536	0.000781608	18715	18716	0.000524541	35908	35909	0.000780387	29883	29884	0.000696715	50522	50523	0.00132789
ISFSRILA	ATATCCTTCTCACGTATCCTCGCC	Pool 13	9026	9027	0.000221847	21381	21382	0.000429159	5326	5327	0.00011811	199	200	3.98148e-06	2944	2945	7.50165e-05	2444	5731	5732	0.000201768	7788	7789	0.00018494	987	988	2.30268e-05	88808	88809	0.00248899	10571	10572	0.000229754	1042	1043	2.43165e-05	6706	6707	0.000176279
ISFSSGCL	ATATCGTTCAGTTCTGGATGTCTA	Pool 13	13603	13604	0.000334331	2930	2931	5.88283e-05	1231	1232	2.73158e-05	4984	4985	9.92385e-05	4911	4912	0.000125121	3052	8373	8374	0.000294767	12554	12555	0.000298103	27312	27313	0.000636571	12662	12663	0.000354898	8417	8418	0.000182943	40	41	9.55873e-07	3566	3567	9.37509e-05
ISFTPTVL	ATATCATTCACCCCAACAGTCTTA	Pool 13	1925	1926	4.73333e-05	352	353	7.08508e-06	55	56	1.24163e-06	326	327	6.50973e-06	1809	1810	4.61052e-05	1924	1183	1184	4.16772e-05	2248	2249	5.33998e-05	NA	1	2.33065e-08	7	8	2.24211e-07	2913	2914	6.3328e-05	NA	1	2.3314e-08	6	7	1.8398e-07
ISFVGCSI	ATATCTTTCGTTGGGTGCTCGATA	Pool 13	4400	4401	0.000108159	43	44	8.83127e-07	273	274	6.07511e-06	473	474	9.43612e-06	2556	2557	6.51332e-05	2289	3011	3012	0.000106023	5004	5005	0.000118838	3	4	9.32261e-08	8	9	2.52237e-07	1086	1087	2.36231e-05	4826	4827	0.000112537	1155	1156	3.0383e-05
ISFVLLAA	ATTAGTTTCGTGCTTCTAGCTGCG	Pool 13	5747	5748	0.000141263	3440	3441	6.90645e-05	558	559	1.23941e-05	962	963	1.91709e-05	1500	1501	3.82342e-05	1749.5	4390	4391	0.000154565	6137	6138	0.000145739	1409	1410	3.28622e-05	567	568	1.5919e-05	2217	2218	4.82023e-05	10946	10947	0.000255218	7211	7212	0.000189552
ISFYNALL	ATTAGCTTCTACAATGCCTTGTTA	Pool 13	11057	11058	0.000271761	242	243	4.87727e-06	3173	3174	7.03737e-05	2312	2313	4.60459e-05	7824	7825	0.000199322	3666	7284	7285	0.000256434	12047	12048	0.000286065	16339	16340	0.000380829	1572	1573	4.40855e-05	3294	3295	7.16081e-05	14288	14289	0.000333133	9467	9468	0.000248846
ISGFEAQL	ATTTCAGGTTTCGAGGCCCAATTA	Pool 13	17830	17831	0.000438214	50653	50654	0.00101668	10799	10800	0.000239457	23575	23576	0.000469337	20361	20362	0.000518671	4571	12356	12357	0.00043497	18227	18228	0.000432802	12667	12668	0.000295247	81976	81977	0.00229752	159282	159283	0.00346159	3030	3031	7.06646e-05	38461	38462	0.00101089
ISGYSLRL	ATTTCCGGCTATAGCCTTCGTCTC	Pool 13	16831	16832	0.000413663	1517	1518	3.04679e-05	3160	3161	7.00855e-05	6532	6533	0.000130055	7031	7032	0.000179123	3536.5	12877	12878	0.00045331	16635	16636	0.000395002	19517	19518	0.000454897	13694	13695	0.000383821	63802	63803	0.00138659	14640	14641	0.00034134	9346	9347	0.000245666
ISHFYSVS	ATTTCACATTTCTATAGCGTATCT	Pool 13	12475	12476	0.00030661	4120	4121	8.27128e-05	1892	1893	4.19715e-05	3816	3817	7.59866e-05	7127	7128	0.000181568	3562	9121	9122	0.000321097	12253	12254	0.000290957	9421	9422	0.000219594	2172	2173	6.09013e-05	35442	35443	0.000770259	4812	4813	0.00011221	7864	7865	0.000206715
ISHMLLPF	ATATCTCATATGCTGTTACCCTTC	Pool 13	12727	12728	0.000312803	1217	1218	2.44465e-05	22095	22096	0.000489911	6874	6875	0.000136864	5332	5333	0.000135845	3150	9457	9458	0.000332925	13036	13037	0.000309548	2374	2375	5.5353e-05	222	223	6.24988e-06	10729	10730	0.000233188	10392	10393	0.000242302	4620	4621	0.000121453
ISHPRRLL	ATTTCTCACCCGCGCCGACTCCTG	Pool 13	3017	3018	7.41703e-05	616	617	1.23838e-05	14688	14689	0.000325683	1070	1071	2.13209e-05	1837	1838	4.68185e-05	1945	1879	1880	6.61766e-05	3097	3098	7.35583e-05	806	807	1.88084e-05	15	16	4.48422e-07	2908	2909	6.32194e-05	3694	3695	8.61451e-05	406	407	1.06971e-05
ISHQHQKL	ATTTCGCATCAACATCAGAAATTA	Pool 13	7749	7750	0.000190464	2788	2789	5.59782e-05	2132	2133	4.72927e-05	2124	2125	4.23033e-05	2966	2967	7.55769e-05	2453	4300	4301	0.000151397	7167	7168	0.000170196	3665	3666	8.54417e-05	11739	11740	0.00032903	5185	5186	0.000112704	525	526	1.22631e-05	2779	2780	7.30663e-05
ISHYFCDL	ATCTCGCACTACTTCTGTGACTTA	Pool 13	5019	5020	0.000123371	446814	446815	0.00896805	10162	10163	0.000225333	1179	1180	2.34908e-05	44697	44698	0.00113857	4904	3484	3485	0.000122673	5447	5448	0.000129356	2723	2724	6.3487e-05	3405	3406	9.54578e-05	367	368	7.9975e-06	3221	3222	7.51176e-05	1561	1562	4.10538e-05
ISIETAQL	ATCTCGATAGAAACCGCCCAGTTA	Pool 13	8955	8956	0.000220102	1827	1828	3.66899e-05	31610	31611	0.000700877	5721	5722	0.00011391	5692	5693	0.000145015	3246	5838	5839	0.000205535	9066	9067	0.000215285	85560	85561	0.00199413	83	84	2.35421e-06	3211	3212	6.98043e-05	3181	3182	7.4185e-05	2141	2142	5.62979e-05
ISIFHGII	ATCAGCATTTTCCACGGTATCATA	Pool 13	9340	9341	0.000229564	9961	9962	0.000199948	10397	10398	0.000230544	4715	4716	9.38834e-05	17227	17228	0.00043884	4458	6732	6733	0.000237004	11019	11020	0.000261657	2489	2490	5.80333e-05	1340	1341	3.75834e-05	3140	3141	6.82613e-05	64369	64370	0.00150072	6753	6754	0.000177514
ISIFTAIL	ATTTCTATCTTCACAGCCATACTC	Pool 13	12423	12424	0.000305332	1117	1118	2.24394e-05	9199	9200	0.000203982	2169	2170	4.31991e-05	7821	7822	0.000199246	3665	9068	9069	0.000319232	12198	12199	0.000289651	1188	1189	2.77115e-05	820	821	2.30096e-05	4042	4043	8.78639e-05	4671	4672	0.000108923	26544	26545	0.000697678
ISIFVAIF	ATCTCTATTTTCGTTGCCATCTTC	Pool 13	7302	7303	0.000179478	2598	2599	5.21647e-05	660	661	1.46556e-05	147	148	2.9463e-06	853	854	2.17535e-05	1260.5	5389	5390	0.00018973	7524	7525	0.000178672	4634	4635	0.000108026	18	19	5.32501e-07	1666	1667	3.62278e-05	4496	4497	0.000104843	3717	3718	9.77196e-05
ISILNSML	ATTTCGATACTGAACAGCATGCTC	Pool 13	NA	1	2.4576e-08	NA	1	2.00711e-08	1	2	4.43439e-08	NA	1	1.99074e-08	NA	1	2.54725e-08	64	NA	1	3.52003e-08	NA	1	2.37438e-08	NA	1	2.33065e-08	NA	1	2.80264e-08	NA	1	2.17323e-08	NA	1	2.3314e-08	NA	1	2.62828e-08
ISILWIPI	ATTTCAATATTATGGATACCGATT	Pool 13	14781	14782	0.000363282	33972	33973	0.000681874	3803	3804	8.4342e-05	5836	5837	0.0001162	42984	42985	0.00109494	4892	10213	10214	0.000359536	15019	15020	0.000356632	23608	23609	0.000550244	23953	23954	0.000671344	799	800	1.73859e-05	6426	6427	0.000149839	9447	9448	0.00024832
ISIMYREV	ATATCTATCATGTATAGAGAGGTA	Pool 13	2819	2820	6.93042e-05	204	205	4.11457e-06	195	196	4.3457e-06	1604	1605	3.19514e-05	462	463	1.17938e-05	921	1880	1881	6.62118e-05	3009	3010	7.14688e-05	144	145	3.37945e-06	329	330	9.2487e-06	294	295	6.41104e-06	6	7	1.63198e-07	557	558	1.46658e-05
ISIPFFAI	ATTTCAATTCCGTTCTTCGCTATC	Pool 13	29185	29186	0.000717274	4632	4633	9.29892e-05	11116	11117	0.000246485	10144	10145	0.000201961	7351	7352	0.000187274	3598.5	20652	20653	0.000726992	28784	28785	0.000683465	8199	8200	0.000191114	2632	2633	7.37934e-05	6066	6067	0.00013185	24574	24575	0.000572941	6916	6917	0.000181798
ISISYGSC	ATCTCCATCTCCTACGGGTCCTGC	Pool 13	5427	5428	0.000133398	3129	3130	6.28224e-05	2310	2311	5.12393e-05	118	119	2.36898e-06	4498	4499	0.000114601	2950	3874	3875	0.000136401	6756	6757	0.000160437	1923	1924	4.48418e-05	13553	13554	0.000379869	2087	2088	4.53771e-05	1491	1492	3.47844e-05	3391	3392	8.91514e-05
ISITCLYV	ATTTCAATAACTTGCCTCTACGTT	Pool 13	5170	5171	0.000127082	147	148	2.97052e-06	1799	1800	3.99095e-05	457	458	9.1176e-06	8733	8734	0.000222477	3784.5	3830	3831	0.000134852	4781	4782	0.000113543	385	386	8.99632e-06	74	75	2.10198e-06	437	438	9.51877e-06	6417	6418	0.000149629	1816	1817	4.77559e-05
ISITFFRL	ATCTCCATCACGTTCTTTCGTTTG	Pool 13	8048	8049	0.000197812	741	742	1.48927e-05	9837	9838	0.000218127	3330	3331	6.63116e-05	10978	10979	0.000279663	4058	6041	6042	0.00021268	9345	9346	0.00022191	2866	2867	6.68198e-05	2287	2288	6.41243e-05	10314	10315	0.000224169	281	282	6.57454e-06	5540	5541	0.000145633
ISITLAVL	ATCTCTATCACGCTGGCCGTATTG	Pool 13	6260	6261	0.00015387	264	265	5.31883e-06	6093	6094	0.000135116	559	560	1.11482e-05	517	518	1.31948e-05	974.5	2991	2992	0.000105319	5991	5992	0.000142273	2038	2039	4.7522e-05	5143	5144	0.000144168	4213	4214	9.15801e-05	1585	1586	3.69759e-05	3350	3351	8.80738e-05
ISIVELAL	ATAAGCATAGTCGAATTGGCATTA	Pool 13	11741	11742	0.000288571	2102	2103	4.22094e-05	3763	3764	8.34551e-05	70412	70413	0.00140174	2250	2251	5.73386e-05	2146.5	6599	6600	0.000232322	11829	11830	0.000280889	8985	8986	0.000209432	301	302	8.46396e-06	1320	1321	2.87084e-05	15112	15113	0.000352344	9923	9924	0.000260831
ISKCLSSL	ATCTCGAAGTGCTTAAGCAGCCTG	Pool 13	892	893	2.19463e-05	797	798	1.60167e-05	355	356	7.89321e-06	NA	1	1.99074e-08	4	5	1.27363e-07	198.5	425	426	1.49953e-05	1026	1027	2.43849e-05	NA	1	2.33065e-08	4	5	1.40132e-07	10	11	2.39056e-07	649	650	1.51541e-05	45	46	1.20901e-06
ISKRISFL	ATAAGCAAAAGGATTTCCTTCTTG	Pool 13	17346	17347	0.000426319	23218	23219	0.00046603	14833	14834	0.000328898	7365	7366	0.000146638	9862	9863	0.000251235	3939	10893	10894	0.000383472	16856	16857	0.000400249	21353	21354	0.000497688	919	920	2.57843e-05	1665	1666	3.62061e-05	88	89	2.07494e-06	11268	11269	0.000296181
ISLEMAAV	ATCTCACTCGAGATGGCTGCAGTT	Pool 13	3986	3987	9.79844e-05	605	606	1.21631e-05	835	836	1.85357e-05	519	520	1.03519e-05	1125	1126	2.8682e-05	1471	2984	2985	0.000105073	4003	4004	9.50702e-05	3650	3651	8.50921e-05	811	812	2.27574e-05	2082	2083	4.52685e-05	2	3	6.99419e-08	4268	4269	0.000112201
ISLFLSTF	ATCTCGCTCTTTCTGAGCACTTTT	Pool 13	6223	6224	0.000152961	5940	5941	0.000119242	2687	2688	5.95981e-05	3510	3511	6.9895e-05	8751	8752	0.000222935	3790	4620	4621	0.000162661	6788	6789	0.000161197	56	57	1.32847e-06	2436	2437	6.83003e-05	5501	5502	0.000119571	146915	146916	0.00342519	1608	1609	4.22891e-05
ISLFTVRL	ATCTCACTGTTCACTGTACGTTTA	Pool 13	7926	7927	0.000194814	3009	3010	6.04139e-05	3798	3799	8.42312e-05	9053	9054	0.000180242	11708	11709	0.000298258	4139	5235	5236	0.000184309	8451	8452	0.000200683	2796	2797	6.51884e-05	757	758	2.1244e-05	6445	6446	0.000140087	1106	1107	2.58086e-05	14384	14385	0.000378079
ISLFYGLL	ATCTCCCTGTTTTATGGGCTTCTA	Pool 13	8845	8846	0.000217399	1861	1862	3.73723e-05	3601	3602	7.98633e-05	9197	9198	0.000183108	2270	2271	5.78481e-05	2156	5887	5888	0.000207259	9529	9530	0.000226278	14985	14986	0.000349272	26183	26184	0.000733842	1268	1269	2.75783e-05	7930	7931	0.000184903	1113	1114	2.92791e-05
ISLFYSAF	ATTTCGCTGTTCTACTCGGCATTT	Pool 13	15459	15460	0.000379944	7947	7948	0.000159525	6959	6960	0.000154317	4919	4920	9.79445e-05	16646	16647	0.000424041	4429	8960	8961	0.00031543	15406	15407	0.000365821	10246	10247	0.000238822	12326	12327	0.000345481	7316	7317	0.000159016	1612	1613	3.76054e-05	11970	11971	0.000314632
ISLIFCLA	ATTAGTTTAATTTTCTGTCTAGCT	Pool 13	11094	11095	0.00027267	2416	2417	4.85117e-05	10568	10569	0.000234335	11986	11987	0.00023863	8958	8959	0.000228208	3818	8381	8382	0.000295049	10994	10995	0.000261063	2406	2407	5.60988e-05	2912	2913	8.16408e-05	2176	2177	4.73113e-05	1815	1816	4.23382e-05	7661	7662	0.000201379
ISLILSDV	ATATCACTGATCTTATCAGATGTC	Pool 13	5568	5569	0.000136864	905	906	1.81844e-05	1718	1719	3.81135e-05	2086	2087	4.15468e-05	9602	9603	0.000244613	3903	3111	3112	0.000109543	5920	5921	0.000140587	12116	12117	0.000282405	669	670	1.87777e-05	10146	10147	0.000220518	3790	3791	8.83832e-05	18375	18376	0.000482974
ISLISITL	ATTAGCTTGATATCTATAACTCTT	Pool 13	6618	6619	0.000162668	862	863	1.73213e-05	389	390	8.64705e-06	631	632	1.25815e-05	3493	3494	8.90009e-05	2648	5490	5491	0.000193285	7256	7257	0.000172309	2396	2397	5.58657e-05	1586	1587	4.44778e-05	5640	5641	0.000122592	905	906	2.11225e-05	6478	6479	0.000170287
ISLKFKAM	ATTAGTTTGAAATTTAAGGCCATG	Pool 13	2796	2797	6.8739e-05	93	94	1.88668e-06	2206	2207	4.89334e-05	268	269	5.3551e-06	74	75	1.91044e-06	430	1757	1758	6.18822e-05	2888	2889	6.85958e-05	912	913	2.12789e-05	154	155	4.34409e-06	49	50	1.08662e-06	18	19	4.42965e-07	1217	1218	3.20125e-05
ISLKRVAV	ATATCTCTAAAGAGGGTAGCCGTA	Pool 13	4164	4165	0.000102359	149	150	3.01066e-06	754	755	1.67398e-05	523	524	1.04315e-05	124	125	3.18406e-06	510.5	2738	2739	9.64137e-05	5034	5035	0.00011955	666	667	1.55455e-05	78	79	2.21408e-06	7	8	1.73859e-07	16	17	3.96337e-07	8250	8251	0.00021686
ISLLKQNL	ATCTCCCTACTTAAGCAAAATCTC	Pool 13	5663	5664	0.000139198	3198	3199	6.42073e-05	6028	6029	0.000133675	1458	1459	2.90449e-05	2753	2754	7.01513e-05	2377	4994	4995	0.000175826	6751	6752	0.000160318	262	263	6.12962e-06	2784	2785	7.80534e-05	6223	6224	0.000135262	34	35	8.15989e-07	882	883	2.32078e-05
ISLLLPQV	ATAAGCCTCCTTCTGCCGCAGGTG	Pool 13	1267	1268	3.11623e-05	384	385	7.72736e-06	2011	2012	4.46099e-05	133	134	2.66759e-06	42	43	1.09532e-06	349.5	805	806	2.83715e-05	915	916	2.17493e-05	9084	9085	0.00021174	5	6	1.68158e-07	NA	1	2.17323e-08	841	842	1.96304e-05	2	3	7.88485e-08
ISLLSSAV	ATTAGCCTGCTCTCCTCGGCCGTC	Pool 13	1572	1573	3.8658e-05	4359	4360	8.75098e-05	2	3	6.65158e-08	12879	12880	0.000256408	469	470	1.19721e-05	926.5	851	852	2.99907e-05	2140	2141	5.08355e-05	262	263	6.12962e-06	3773	3774	0.000105772	2924	2925	6.35671e-05	3	4	9.32559e-08	1118	1119	2.94105e-05
ISLLWSCI	ATATCTCTCCTCTGGAGTTGCATT	Pool 13	8824	8825	0.000216883	4633	4634	9.30093e-05	5811	5812	0.000128863	7661	7662	0.000152531	1956	1957	4.98497e-05	2006	5363	5364	0.000188814	8342	8343	0.000198095	7033	7034	0.000163938	2710	2711	7.59795e-05	3995	3996	8.68424e-05	4707	4708	0.000109762	4719	4720	0.000124055
ISLMSCFL	ATATCCCTCATGAGTTGCTTCTTG	Pool 13	1583	1584	3.89283e-05	578	579	1.16211e-05	13	14	3.10407e-07	2284	2285	4.54885e-05	3086	3087	7.86336e-05	2510	995	996	3.50595e-05	1373	1374	3.2624e-05	4	5	1.16533e-07	4	5	1.40132e-07	403	404	8.77987e-06	39	40	9.32559e-07	322	323	8.48936e-06
ISLPFFIM	ATTTCGCTTCCCTTCTTCATTATG	Pool 13	10274	10275	0.000252518	4936	4937	9.90908e-05	3131	3132	6.94425e-05	6706	6707	0.000133519	12704	12705	0.000323628	4209	8165	8166	0.000287446	10763	10764	0.000255578	12060	12061	0.0002811	1460	1461	4.09465e-05	1777	1778	3.86401e-05	1659	1660	3.87012e-05	3105	3106	8.16345e-05
ISLPHFLM	ATTTCCCTTCCACACTTTCTAATG	Pool 13	11768	11769	0.000289235	7815	7816	0.000156875	9410	9411	0.00020866	7537	7538	0.000150062	3480	3481	8.86698e-05	2641	8281	8282	0.000291529	13090	13091	0.00031083	4866	4867	0.000113433	24810	24811	0.000695362	7860	7861	0.000170838	2044	2045	4.76771e-05	3455	3456	9.08335e-05
ISLSFLDL	ATCAGTTTGTCCTTCCTCGATTTA	Pool 13	4865	4866	0.000119587	4699	4700	9.4334e-05	4488	4489	9.95298e-05	2621	2622	5.21973e-05	4674	4675	0.000119084	2998	3272	3273	0.000115211	4933	4934	0.000117152	1322	1323	3.08345e-05	14	15	4.20396e-07	1931	1932	4.19869e-05	1631	1632	3.80484e-05	491	492	1.29312e-05
ISLSHQNL	ATAAGCCTGAGCCATCAAAACTTG	Pool 13	3174	3175	7.80287e-05	46	47	9.4334e-07	7824	7825	0.000173495	1375	1376	2.73926e-05	1539	1540	3.92277e-05	1774.5	1732	1733	6.10021e-05	2812	2813	6.67913e-05	788	789	1.83888e-05	1275	1276	3.57616e-05	15999	16000	0.000347717	71	72	1.67861e-06	152	153	4.02128e-06
ISLSVKKL	ATCTCATTATCTGTCAAGAAATTG	Pool 13	10229	10230	0.000251412	884	885	1.77629e-05	4984	4985	0.000110527	3075	3076	6.12352e-05	3457	3458	8.80839e-05	2632	7097	7098	0.000249852	9259	9260	0.000219868	2985	2986	6.95933e-05	496	497	1.39291e-05	24652	24653	0.000535767	1104	1105	2.57619e-05	3870	3871	0.000101741
ISLTLCFL	ATAAGCTTAACACTTTGCTTCCTT	Pool 13	17863	17864	0.000439025	1971	1972	3.95801e-05	12901	12902	0.000286062	104857	104858	0.00208745	13893	13894	0.000353915	4287	13142	13143	0.000462638	17541	17542	0.000416514	7349	7350	0.000171303	128	129	3.6154e-06	4960	4961	0.000107814	8673	8674	0.000202225	5781	5782	0.000151967
ISLVHSMI	ATTAGTCTGGTACACTCCATGATA	Pool 13	7794	7795	0.00019157	3112	3113	6.24812e-05	1856	1857	4.11733e-05	1783	1784	3.55148e-05	7397	7398	0.000188446	3608	5203	5204	0.000183182	7449	7450	0.000176891	552	553	1.28885e-05	1449	1450	4.06382e-05	3804	3805	8.26916e-05	9279	9280	0.000216354	3020	3021	7.94005e-05
ISLVISTL	ATTAGTCTCGTTATCAGTACACTT	Pool 13	5941	5942	0.00014603	35	36	7.22558e-07	13219	13220	0.000293113	2097	2098	4.17658e-05	3109	3110	7.92195e-05	2517	3902	3903	0.000137387	5908	5909	0.000140302	10660	10661	0.000248471	960	961	2.69333e-05	1497	1498	3.2555e-05	9777	9778	0.000227964	2016	2017	5.30125e-05
ISLVLAPT	ATAAGTCTCGTGCTCGCACCTACT	Pool 13	3811	3812	9.36836e-05	31	32	6.42274e-07	283	284	6.29683e-06	254	255	5.07639e-06	352	353	8.9918e-06	795	2990	2991	0.000105284	4402	4403	0.000104544	2085	2086	4.86174e-05	11833	11834	0.000331664	1008	1009	2.19279e-05	150	151	3.52041e-06	158	159	4.17897e-06
ISLYFPTL	ATATCCCTTTATTTCCCAACGCTG	Pool 13	7231	7232	0.000177733	2541	2542	5.10206e-05	2665	2666	5.91104e-05	32782	32783	0.000652625	1601	1602	4.0807e-05	1807.5	3953	3954	0.000139182	7623	7624	0.000181023	385	386	8.99632e-06	9006	9007	0.000252433	10777	10778	0.000234231	72	73	1.70192e-06	1237	1238	3.25382e-05
ISLYKAQI	ATATCACTATACAAAGCTCAAATC	Pool 13	NA	1	2.4576e-08	NA	1	2.00711e-08	NA	1	2.21719e-08	1	2	3.98148e-08	1	2	5.0945e-08	134.5	NA	1	3.52003e-08	NA	1	2.37438e-08	NA	1	2.33065e-08	1	2	5.60527e-08	NA	1	2.17323e-08	NA	1	2.3314e-08	NA	1	2.62828e-08
ISLYNTSM	ATCAGCCTGTACAACACTTCCATG	Pool 13	12674	12675	0.0003115	116	117	2.34831e-06	12817	12818	0.0002842	2768	2769	5.51237e-05	6710	6711	0.000170946	3465	8629	8630	0.000303779	15687	15688	0.000372493	326	327	7.62123e-06	4335	4336	0.000121522	948	949	2.0624e-05	8010	8011	0.000186768	6063	6064	0.000159379
ISMAASTL	ATTAGTATGGCAGCATCGACACTC	Pool 13	3767	3768	9.26022e-05	41	42	8.42984e-07	1693	1694	3.75592e-05	2066	2067	4.11486e-05	14456	14457	0.000368256	4321.5	2516	2517	8.85992e-05	4018	4019	9.54263e-05	1489	1490	3.47267e-05	21	22	6.1658e-07	1358	1359	2.95343e-05	9944	9945	0.000231857	2912	2913	7.65619e-05
[truncated: 3,715 more rows]
