# Supplementary material for: Rejection of immunogenic tumor clones is limited by clonal fraction
Source: eLife. 2018 Nov 30;7:e41090. doi: 10.7554/eLife.41090 (PMC6269121; doi:10.7554/eLife.41090)
Supplement: Figure 5—source data 1. [file elife-41090-fig5-data1.xlsx]

## Sheet: Figure 5 counts and frequencies
peptide	DNA	pool	Pool_13_Rag_1	Pool_13_Rag_1_pseudocount	Pool_13_Rag_1_freq	Pool_13_Rag2wt_1	Pool_13_Rag2wt_1_pseudocount	Pool_13_Rag2wt_1_freq	Pool_13_Rag2wt_2	Pool_13_Rag2wt_2_pseudocount	Pool_13_Rag2wt_2_freq	Pool_13_Rag2wt_3	Pool_13_Rag2wt_3_pseudocount	Pool_13_Rag2wt_3_freq	Pool_18_Rag2Rag_1	Pool_18_Rag2Rag_1_pseudocount	Pool_18_Rag2Rag_1_freq	Pool_18_Rag2Rag_2	Pool_18_Rag2Rag_2_pseudocount	Pool_18_Rag2Rag_2_freq	Pool_18_Rag2Rag_3	Pool_18_Rag2Rag_3_pseudocount	Pool_18_Rag2Rag_3_freq	Pool_18_Rag2wt_1	Pool_18_Rag2wt_1_pseudocount	Pool_18_Rag2wt_1_freq	Pool_18_Rag2wt_2	Pool_18_Rag2wt_2_pseudocount	Pool_18_Rag2wt_2_freq	Pool_13_Rag_2	Pool_13_Rag_2_pseudocount	Pool_13_Rag_2_freq	Pool_13_Rag_3	Pool_13_Rag_3_pseudocount	Pool_13_Rag_3_freq	Pool_18_Rag_1	Pool_18_Rag_1_pseudocount	Pool_18_Rag_1_freq	Pool_18_Rag_2	Pool_18_Rag_2_pseudocount	Pool_18_Rag_2_freq	Pool_18_Rag_3	Pool_18_Rag_3_pseudocount	Pool_18_Rag_3_freq	Pool_13_Rag2Rag_1	Pool_13_Rag2Rag_1_pseudocount	Pool_13_Rag2Rag_1_freq	Pool_13_Rag2Rag_2	Pool_13_Rag2Rag_2_pseudocount
AAEEFAFL	GCCGCGGAGGAATTCGCCTTCCTC	Pool 13	393	394	4.26432e-05	808	809	4.30446e-05	110	111	1.80962e-06	230	231	3.73913e-06	NA	NA	NA	NA	NA	NA	NA	NA	NA	NA	NA	NA	NA	NA	NA	1596	1597	8.77924e-05	1036	1037	5.74788e-05	NA	NA	NA	NA	NA	NA	NA	NA	NA	136	137	4.17801e-06	194	195
AAEFHPGL	GCAGCTGAGTTTCACCCTGGGCTT	Pool 13	1206	1207	0.000130635	580	581	3.09134e-05	36	37	6.03207e-07	1548	1549	2.50732e-05	NA	NA	NA	NA	NA	NA	NA	NA	NA	NA	NA	NA	NA	NA	NA	5144	5145	0.000282838	5034	5035	0.00027908	NA	NA	NA	NA	NA	NA	NA	NA	NA	393	394	1.20156e-05	278	279
AAELYLNL	GCGGCCGAGTTGTACCTTAATCTC	Pool 13	5337	5338	0.00057774	11012	11013	0.000585971	3524	3525	5.74677e-05	5680	5681	9.19568e-05	NA	NA	NA	NA	NA	NA	NA	NA	NA	NA	NA	NA	NA	NA	NA	20440	20441	0.00112371	14120	14121	0.000782698	NA	NA	NA	NA	NA	NA	NA	NA	NA	3423	3424	0.00010442	14900	14901
AAEYLAML	GCTGCAGAATACTTGGCGATGCTA	Pool 13	1041	1042	0.000112777	172	173	9.20484e-06	62	63	1.02708e-06	NA	1	1.61867e-08	NA	NA	NA	NA	NA	NA	NA	NA	NA	NA	NA	NA	NA	NA	NA	2226	2227	0.000122426	1076	1077	5.96959e-05	NA	NA	NA	NA	NA	NA	NA	NA	NA	8	9	2.74468e-07	56	57
AAFALFSL	GCCGCATTTGCATTGTTCTCTCTT	Pool 13	1492	1493	0.00016159	416	417	2.21874e-05	696	697	1.13631e-05	1610	1611	2.60768e-05	NA	NA	NA	NA	NA	NA	NA	NA	NA	NA	NA	NA	NA	NA	NA	4482	4483	0.000246445	2190	2191	0.000121443	NA	NA	NA	NA	NA	NA	NA	NA	NA	96	97	2.95815e-06	210	211
AAFMLFCI	GCTGCCTTCATGTTATTCTGTATC	Pool 13	103041	103042	0.0111524	58740	58741	0.00312544	23016	23017	0.000375243	224684	224685	0.00363691	NA	NA	NA	NA	NA	NA	NA	NA	NA	NA	NA	NA	NA	NA	NA	112058	112059	0.00616025	72054	72055	0.00399386	NA	NA	NA	NA	NA	NA	NA	NA	NA	43929	43930	0.00133971	64069	64070
AAFQALGL	GCGGCGTTTCAGGCGTTGGGTCTG	Pool 13	367	368	3.98292e-05	220	221	1.17588e-05	60	61	9.94476e-07	108	109	1.76435e-06	NA	NA	NA	NA	NA	NA	NA	NA	NA	NA	NA	NA	NA	NA	NA	3380	3381	0.000185865	1004	1005	5.57051e-05	NA	NA	NA	NA	NA	NA	NA	NA	NA	99	100	3.04964e-06	17	18
AAFQGLFL	GCTGCCTTCCAGGGGCTGTTTCTT	Pool 13	254	255	2.7599e-05	130	131	6.97014e-06	564	565	9.21113e-06	412	413	6.68512e-06	NA	NA	NA	NA	NA	NA	NA	NA	NA	NA	NA	NA	NA	NA	NA	1494	1495	8.21851e-05	844	845	4.68366e-05	NA	NA	NA	NA	NA	NA	NA	NA	NA	34	35	1.06737e-06	36	37
AAFTLAHI	GCGGCGTTCACACTCGCGCATATT	Pool 13	358	359	3.88551e-05	86	87	4.62903e-06	24	25	4.07572e-07	50	51	8.25523e-07	NA	NA	NA	NA	NA	NA	NA	NA	NA	NA	NA	NA	NA	NA	NA	1022	1023	5.62377e-05	1136	1137	6.30216e-05	NA	NA	NA	NA	NA	NA	NA	NA	NA	51	52	1.58581e-06	68	69
AAFTYAII	GCGGCGTTTACCTACGCGATCATC	Pool 13	415	416	4.50243e-05	110	111	5.906e-06	108	109	1.77701e-06	60	61	9.8739e-07	NA	NA	NA	NA	NA	NA	NA	NA	NA	NA	NA	NA	NA	NA	NA	1358	1359	7.47087e-05	1018	1019	5.64811e-05	NA	NA	NA	NA	NA	NA	NA	NA	NA	343	344	1.04908e-05	612	613
AAFVVVLL	GCCGCATTTGTCGTTGTACTTCTG	Pool 13	1594	1595	0.000172629	1468	1469	7.81614e-05	300	301	4.90717e-06	9520	9521	0.000154114	NA	NA	NA	NA	NA	NA	NA	NA	NA	NA	NA	NA	NA	NA	NA	5456	5457	0.000299989	3052	3053	0.000169222	NA	NA	NA	NA	NA	NA	NA	NA	NA	656	657	2.00361e-05	1122	1123
AAHGYLNL	GCCGCACATGGGTACTTAAACCTA	Pool 13	2048	2049	0.000221766	2474	2475	0.000131688	264	265	4.32026e-06	950	951	1.53936e-05	NA	NA	NA	NA	NA	NA	NA	NA	NA	NA	NA	NA	NA	NA	NA	9606	9607	0.000528129	4264	4265	0.0002364	NA	NA	NA	NA	NA	NA	NA	NA	NA	1575	1576	4.80623e-05	436	437
AAIFKLSL	GCGGCCATATTCAAACTGAGTCTT	Pool 13	NA	1	1.08231e-07	NA	1	5.32072e-08	NA	1	1.63029e-08	NA	1	1.61867e-08	NA	NA	NA	NA	NA	NA	NA	NA	NA	NA	NA	NA	NA	NA	NA	NA	1	5.49733e-08	NA	1	5.5428e-08	NA	NA	NA	NA	NA	NA	NA	NA	NA	NA	1	3.04964e-08	NA	1
AAKLYATV	GCTGCCAAACTGTATGCCACTGTC	Pool 13	6505	6506	0.000704154	4020	4021	0.000213946	27214	27215	0.000443683	64396	64397	0.00104238	NA	NA	NA	NA	NA	NA	NA	NA	NA	NA	NA	NA	NA	NA	NA	6580	6581	0.000361779	10166	10167	0.000563536	NA	NA	NA	NA	NA	NA	NA	NA	NA	22137	22138	0.000675129	13781	13782
AALFFVSL	GCTGCGTTGTTCTTCGTATCTTTA	Pool 13	2180	2181	0.000236053	564	565	3.00621e-05	224	225	3.66815e-06	292	293	4.74271e-06	NA	NA	NA	NA	NA	NA	NA	NA	NA	NA	NA	NA	NA	NA	NA	4978	4979	0.000273712	4244	4245	0.000235292	NA	NA	NA	NA	NA	NA	NA	NA	NA	334	335	1.02163e-05	224	225
AALFVLTL	GCCGCCCTGTTCGTCCTTACGCTC	Pool 13	NA	1	1.08231e-07	NA	1	5.32072e-08	NA	1	1.63029e-08	NA	1	1.61867e-08	NA	NA	NA	NA	NA	NA	NA	NA	NA	NA	NA	NA	NA	NA	NA	NA	1	5.49733e-08	NA	1	5.5428e-08	NA	NA	NA	NA	NA	NA	NA	NA	NA	NA	1	3.04964e-08	NA	1
AALFWWNL	GCGGCGTTGTTTTGGTGGAATCTA	Pool 13	6786	6787	0.000734567	66094	66095	0.00351673	13222	13223	0.000215573	11318	11319	0.000183218	NA	NA	NA	NA	NA	NA	NA	NA	NA	NA	NA	NA	NA	NA	NA	17018	17019	0.000935591	16028	16029	0.000888455	NA	NA	NA	NA	NA	NA	NA	NA	NA	121897	121898	0.00371745	8818	8819
AALGLALL	GCGGCTCTAGGACTAGCCCTACTA	Pool 13	1354	1355	0.000146654	872	873	4.64499e-05	1836	1837	2.99484e-05	2240	2241	3.62745e-05	NA	NA	NA	NA	NA	NA	NA	NA	NA	NA	NA	NA	NA	NA	NA	3992	3993	0.000219508	4598	4599	0.000254913	NA	NA	NA	NA	NA	NA	NA	NA	NA	239	240	7.31913e-06	934	935
AALLLASL	GCCGCACTCCTCCTCGCGTCCCTA	Pool 13	331	332	3.59328e-05	22	23	1.22377e-06	8	9	1.46726e-07	50	51	8.25523e-07	NA	NA	NA	NA	NA	NA	NA	NA	NA	NA	NA	NA	NA	NA	NA	1704	1705	9.37295e-05	566	567	3.14277e-05	NA	NA	NA	NA	NA	NA	NA	NA	NA	5	6	1.82978e-07	20	21
AALLYRPV	GCAGCTCTGCTATATAGGCCCGTG	Pool 13	267	268	2.9006e-05	104	105	5.58676e-06	800	801	1.30586e-05	46	47	7.60776e-07	NA	NA	NA	NA	NA	NA	NA	NA	NA	NA	NA	NA	NA	NA	NA	1314	1315	7.22899e-05	640	641	3.55293e-05	NA	NA	NA	NA	NA	NA	NA	NA	NA	373	374	1.14057e-05	371	372
AALRFSQL	GCCGCCCTCAGGTTCTCTCAACTG	Pool 13	13	14	1.51524e-06	NA	1	5.32072e-08	NA	1	1.63029e-08	NA	1	1.61867e-08	NA	NA	NA	NA	NA	NA	NA	NA	NA	NA	NA	NA	NA	NA	NA	26	27	1.48428e-06	2	3	1.66284e-07	NA	NA	NA	NA	NA	NA	NA	NA	NA	NA	1	3.04964e-08	NA	1
AALSRLAL	GCCGCGCTCTCGCGTCTGGCACTC	Pool 13	13	14	1.51524e-06	4	5	2.66036e-07	52	53	8.64053e-07	NA	1	1.61867e-08	NA	NA	NA	NA	NA	NA	NA	NA	NA	NA	NA	NA	NA	NA	NA	42	43	2.36385e-06	130	131	7.26106e-06	NA	NA	NA	NA	NA	NA	NA	NA	NA	NA	1	3.04964e-08	2	3
AAMAFCFL	GCGGCAATGGCGTTTTGCTTTCTG	Pool 13	1211	1212	0.000131177	496	497	2.6444e-05	366	367	5.98316e-06	506	507	8.20667e-06	NA	NA	NA	NA	NA	NA	NA	NA	NA	NA	NA	NA	NA	NA	NA	3876	3877	0.000213131	2786	2787	0.000154478	NA	NA	NA	NA	NA	NA	NA	NA	NA	444	445	1.35709e-05	394	395
AAMFSVSL	GCTGCTATGTTCTCCGTCTCTTTA	Pool 13	5096	5097	0.000551656	1392	1393	7.41176e-05	1732	1733	2.82529e-05	2306	2307	3.73428e-05	NA	NA	NA	NA	NA	NA	NA	NA	NA	NA	NA	NA	NA	NA	NA	10832	10833	0.000595526	11720	11721	0.000649671	NA	NA	NA	NA	NA	NA	NA	NA	NA	922	923	2.81482e-05	2117	2118
AAMQHGPL	GCCGCTATGCAGCATGGTCCCCTA	Pool 13	3250	3251	0.000351861	642	643	3.42122e-05	280	281	4.58111e-06	258	259	4.19236e-06	NA	NA	NA	NA	NA	NA	NA	NA	NA	NA	NA	NA	NA	NA	NA	5338	5339	0.000293502	3030	3031	0.000168002	NA	NA	NA	NA	NA	NA	NA	NA	NA	244	245	7.47162e-06	1224	1225
AAMTVMHL	GCCGCCATGACCGTTATGCACTTA	Pool 13	211	212	2.29451e-05	10	11	5.85279e-07	NA	1	1.63029e-08	84	85	1.37587e-06	NA	NA	NA	NA	NA	NA	NA	NA	NA	NA	NA	NA	NA	NA	NA	900	901	4.95309e-05	430	431	2.38894e-05	NA	NA	NA	NA	NA	NA	NA	NA	NA	10	11	3.3546e-07	5	6
AANPFFKL	GCCGCCAACCCATTCTTTAAGCTC	Pool 13	1074	1075	0.000116349	2054	2055	0.000109341	170	171	2.78779e-06	334	335	5.42255e-06	NA	NA	NA	NA	NA	NA	NA	NA	NA	NA	NA	NA	NA	NA	NA	3568	3569	0.0001962	3152	3153	0.000174764	NA	NA	NA	NA	NA	NA	NA	NA	NA	318	319	9.72835e-06	508	509
AAPFSAFL	GCCGCACCATTCTCTGCATTTCTA	Pool 13	14757	14758	0.00159728	14396	14397	0.000766024	3916	3917	6.38584e-05	38742	38743	0.000627122	NA	NA	NA	NA	NA	NA	NA	NA	NA	NA	NA	NA	NA	NA	NA	11618	11619	0.000638735	11286	11287	0.000625615	NA	NA	NA	NA	NA	NA	NA	NA	NA	12740	12741	0.000388555	25538	25539
AAPWYFPI	GCGGCTCCCTGGTATTTTCCAATC	Pool 13	2156	2157	0.000233455	1014	1015	5.40053e-05	774	775	1.26347e-05	590	591	9.56636e-06	NA	NA	NA	NA	NA	NA	NA	NA	NA	NA	NA	NA	NA	NA	NA	6122	6123	0.000336602	4936	4937	0.000273648	NA	NA	NA	NA	NA	NA	NA	NA	NA	8591	8592	0.000262025	1625	1626
AAQDFCQL	GCTGCGCAGGACTTCTGTCAGTTA	Pool 13	347	348	3.76646e-05	28	29	1.54301e-06	4	5	8.15144e-08	66	67	1.08451e-06	NA	NA	NA	NA	NA	NA	NA	NA	NA	NA	NA	NA	NA	NA	NA	280	281	1.54475e-05	536	537	2.97648e-05	NA	NA	NA	NA	NA	NA	NA	NA	NA	93	94	2.86666e-06	9	10
AAQKYEAL	GCTGCACAGAAATATGAGGCGCTA	Pool 13	1145	1146	0.000124033	66	67	3.56488e-06	2	3	4.89086e-08	92	93	1.50537e-06	NA	NA	NA	NA	NA	NA	NA	NA	NA	NA	NA	NA	NA	NA	NA	2362	2363	0.000129902	2848	2849	0.000157914	NA	NA	NA	NA	NA	NA	NA	NA	NA	14	15	4.57446e-07	16	17
AAQMFFFV	GCCGCTCAGATGTTCTTCTTCGTG	Pool 13	3371	3372	0.000364957	660	661	3.517e-05	188	189	3.08124e-06	1168	1169	1.89223e-05	NA	NA	NA	NA	NA	NA	NA	NA	NA	NA	NA	NA	NA	NA	NA	5330	5331	0.000293063	12842	12843	0.000711861	NA	NA	NA	NA	NA	NA	NA	NA	NA	922	923	2.81482e-05	901	902
AARFVLSL	GCTGCCCGATTTGTACTCAGCCTA	Pool 13	577	578	6.25578e-05	80	81	4.30978e-06	182	183	2.98343e-06	164	165	2.67081e-06	NA	NA	NA	NA	NA	NA	NA	NA	NA	NA	NA	NA	NA	NA	NA	1464	1465	8.05359e-05	2846	2847	0.000157803	NA	NA	NA	NA	NA	NA	NA	NA	NA	107	108	3.29361e-06	2732	2733
AARVFQSV	GCGGCTCGAGTATTTCAAAGTGTA	Pool 13	1128	1129	0.000122193	262	263	1.39935e-05	202	203	3.30948e-06	74	75	1.214e-06	NA	NA	NA	NA	NA	NA	NA	NA	NA	NA	NA	NA	NA	NA	NA	3072	3073	0.000168933	2696	2697	0.000149489	NA	NA	NA	NA	NA	NA	NA	NA	NA	412	413	1.2595e-05	1040	1041
AAVLSFSL	GCTGCTGTTCTGAGTTTCTCGCTC	Pool 13	5141	5142	0.000556526	4696	4697	0.000249914	4636	4637	7.55965e-05	5772	5773	9.3446e-05	NA	NA	NA	NA	NA	NA	NA	NA	NA	NA	NA	NA	NA	NA	NA	21970	21971	0.00120782	13986	13987	0.000775271	NA	NA	NA	NA	NA	NA	NA	NA	NA	7819	7820	0.000238482	2824	2825
AAWCLHHI	GCAGCGTGGTGCTTACATCACATC	Pool 13	769	770	8.33382e-05	38	39	2.07508e-06	2	3	4.89086e-08	282	283	4.58084e-06	NA	NA	NA	NA	NA	NA	NA	NA	NA	NA	NA	NA	NA	NA	NA	2280	2281	0.000125394	2060	2061	0.000114237	NA	NA	NA	NA	NA	NA	NA	NA	NA	15	16	4.87942e-07	29	30
AAWPFPVL	GCCGCCTGGCCTTTCCCTGTACTA	Pool 13	94	95	1.0282e-05	12	13	6.91693e-07	NA	1	1.63029e-08	98	99	1.60249e-06	NA	NA	NA	NA	NA	NA	NA	NA	NA	NA	NA	NA	NA	NA	NA	324	325	1.78663e-05	116	117	6.48507e-06	NA	NA	NA	NA	NA	NA	NA	NA	NA	377	378	1.15276e-05	14	15
AAWTVRAL	GCCGCATGGACGGTTAGGGCCCTA	Pool 13	73	74	8.00913e-06	NA	1	5.32072e-08	6	7	1.1412e-07	24	25	4.04668e-07	NA	NA	NA	NA	NA	NA	NA	NA	NA	NA	NA	NA	NA	NA	NA	126	127	6.98161e-06	16	17	9.42275e-07	NA	NA	NA	NA	NA	NA	NA	NA	NA	NA	1	3.04964e-08	2	3
AAYEFRVI	GCTGCATATGAGTTTCGGGTTATC	Pool 13	5019	5020	0.000543322	1410	1411	7.50753e-05	158	159	2.59216e-06	8342	8343	0.000135046	NA	NA	NA	NA	NA	NA	NA	NA	NA	NA	NA	NA	NA	NA	NA	7756	7757	0.000426428	9928	9929	0.000550344	NA	NA	NA	NA	NA	NA	NA	NA	NA	291	292	8.90495e-06	1060	1061
AAYFGFSV	GCGGCCTATTTTGGATTTAGCGTG	Pool 13	926	927	0.000100331	794	795	4.22997e-05	1134	1135	1.85038e-05	998	999	1.61705e-05	NA	NA	NA	NA	NA	NA	NA	NA	NA	NA	NA	NA	NA	NA	NA	3318	3319	0.000182456	1588	1589	8.8075e-05	NA	NA	NA	NA	NA	NA	NA	NA	NA	147	148	4.51347e-06	973	974
AAYFLAAC	GCGGCCTATTTTCTCGCAGCCTGT	Pool 13	982	983	0.000106392	296	297	1.58025e-05	82	83	1.35314e-06	400	401	6.49088e-06	NA	NA	NA	NA	NA	NA	NA	NA	NA	NA	NA	NA	NA	NA	NA	2884	2885	0.000158598	1434	1435	7.95391e-05	NA	NA	NA	NA	NA	NA	NA	NA	NA	48	49	1.49432e-06	323	324
AAYLSKSL	GCAGCTTACCTAAGTAAAAGCTTG	Pool 13	271	272	2.9439e-05	380	381	2.02719e-05	38	39	6.35812e-07	206	207	3.35065e-06	NA	NA	NA	NA	NA	NA	NA	NA	NA	NA	NA	NA	NA	NA	NA	1974	1975	0.000108572	1296	1297	7.18901e-05	NA	NA	NA	NA	NA	NA	NA	NA	NA	30	31	9.45388e-07	82	83
ACLNFLKL	GCTTGCCTGAACTTTCTCAAACTT	Pool 13	7089	7090	0.000767361	11464	11465	0.00061002	24656	24657	0.00040198	34414	34415	0.000557066	NA	NA	NA	NA	NA	NA	NA	NA	NA	NA	NA	NA	NA	NA	NA	13366	13367	0.000734828	25794	25795	0.00142976	NA	NA	NA	NA	NA	NA	NA	NA	NA	55808	55809	0.00170197	19702	19703
ACTFFFHL	GCTTGTACATTCTTCTTTCATCTC	Pool 13	14650	14651	0.0015857	20626	20627	0.0010975	7768	7769	0.000126657	71408	71409	0.00115588	NA	NA	NA	NA	NA	NA	NA	NA	NA	NA	NA	NA	NA	NA	NA	40948	40949	0.0022511	39312	39313	0.00217904	NA	NA	NA	NA	NA	NA	NA	NA	NA	6925	6926	0.000211218	12488	12489
ADYVFTSI	GCAGACTATGTCTTTACCAGCATC	Pool 13	1654	1655	0.000179123	1310	1311	6.97546e-05	416	417	6.7983e-06	1150	1151	1.86309e-05	NA	NA	NA	NA	NA	NA	NA	NA	NA	NA	NA	NA	NA	NA	NA	3554	3555	0.00019543	3028	3029	0.000167891	NA	NA	NA	NA	NA	NA	NA	NA	NA	922	923	2.81482e-05	1923	1924
AEYVFADL	GCTGAATATGTGTTCGCAGATCTA	Pool 13	1487	1488	0.000161048	570	571	3.03813e-05	270	271	4.41808e-06	206	207	3.35065e-06	NA	NA	NA	NA	NA	NA	NA	NA	NA	NA	NA	NA	NA	NA	NA	3628	3629	0.000199498	7198	7199	0.000399026	NA	NA	NA	NA	NA	NA	NA	NA	NA	181	182	5.55034e-06	58	59
AFAFHSYL	GCTTTTGCATTTCATAGCTATTTG	Pool 13	1996	1997	0.000216138	5420	5421	0.000288436	1648	1649	2.68835e-05	2754	2755	4.45944e-05	NA	NA	NA	NA	NA	NA	NA	NA	NA	NA	NA	NA	NA	NA	NA	16562	16563	0.000910523	8916	8917	0.000494251	NA	NA	NA	NA	NA	NA	NA	NA	NA	2495	2496	7.6119e-05	1404	1405
AFAFSALF	GCATTTGCCTTCAGCGCTCTATTT	Pool 13	230	231	2.50015e-05	148	149	7.92787e-06	218	219	3.57033e-06	238	239	3.86863e-06	NA	NA	NA	NA	NA	NA	NA	NA	NA	NA	NA	NA	NA	NA	NA	1284	1285	7.06407e-05	626	627	3.47533e-05	NA	NA	NA	NA	NA	NA	NA	NA	NA	1	2	6.09928e-08	106	107
AFCTFLAL	GCCTTCTGCACGTTTCTAGCTTTA	Pool 13	1634	1635	0.000176958	2886	2887	0.000153609	280	281	4.58111e-06	646	647	1.04728e-05	NA	NA	NA	NA	NA	NA	NA	NA	NA	NA	NA	NA	NA	NA	NA	3566	3567	0.00019609	2936	2937	0.000162792	NA	NA	NA	NA	NA	NA	NA	NA	NA	1832	1833	5.58999e-05	971	972
AFFFAGTV	GCTTTCTTCTTTGCCGGTACGGTT	Pool 13	320	321	3.47423e-05	268	269	1.43127e-05	102	103	1.6792e-06	68	69	1.11688e-06	NA	NA	NA	NA	NA	NA	NA	NA	NA	NA	NA	NA	NA	NA	NA	482	483	2.65521e-05	836	837	4.63932e-05	NA	NA	NA	NA	NA	NA	NA	NA	NA	55	56	1.7078e-06	133	134
AFFSFAPL	GCTTTCTTTAGTTTTGCACCGCTG	Pool 13	557	558	6.03932e-05	1060	1061	5.64528e-05	894	895	1.45911e-05	1386	1387	2.2451e-05	NA	NA	NA	NA	NA	NA	NA	NA	NA	NA	NA	NA	NA	NA	NA	2320	2321	0.000127593	864	865	4.79452e-05	NA	NA	NA	NA	NA	NA	NA	NA	NA	294	295	8.99644e-06	271	272
AFFSHPFL	GCGTTCTTTTCCCACCCGTTCTTG	Pool 13	1499	1500	0.000162347	302	303	1.61218e-05	276	277	4.5159e-06	362	363	5.87578e-06	NA	NA	NA	NA	NA	NA	NA	NA	NA	NA	NA	NA	NA	NA	NA	2490	2491	0.000136938	2948	2949	0.000163457	NA	NA	NA	NA	NA	NA	NA	NA	NA	252	253	7.71559e-06	321	322
AFFSWNRI	GCTTTCTTCTCATGGAACCGGATA	Pool 13	461	462	5.00029e-05	518	519	2.76145e-05	318	319	5.20062e-06	384	385	6.23189e-06	NA	NA	NA	NA	NA	NA	NA	NA	NA	NA	NA	NA	NA	NA	NA	928	929	5.10702e-05	676	677	3.75247e-05	NA	NA	NA	NA	NA	NA	NA	NA	NA	588	589	1.79624e-05	346	347
AFFVLVPL	GCCTTCTTTGTATTAGTCCCTTTA	Pool 13	573	574	6.21249e-05	236	237	1.26101e-05	176	177	2.88561e-06	298	299	4.83983e-06	NA	NA	NA	NA	NA	NA	NA	NA	NA	NA	NA	NA	NA	NA	NA	1406	1407	7.73474e-05	1334	1335	7.39963e-05	NA	NA	NA	NA	NA	NA	NA	NA	NA	75	76	2.31773e-06	126	127
AFGYLLPI	GCGTTTGGTTATCTCCTCCCCATA	Pool 13	2204	2205	0.00023865	668	669	3.55956e-05	388	389	6.34182e-06	664	665	1.07642e-05	NA	NA	NA	NA	NA	NA	NA	NA	NA	NA	NA	NA	NA	NA	NA	3968	3969	0.000218189	7354	7355	0.000407673	NA	NA	NA	NA	NA	NA	NA	NA	NA	799	800	2.43971e-05	411	412
AFIAFANL	GCGTTCATAGCATTCGCTAACTTA	Pool 13	5242	5243	0.000567458	3922	3923	0.000208732	1160	1161	1.89276e-05	3138	3139	5.08101e-05	NA	NA	NA	NA	NA	NA	NA	NA	NA	NA	NA	NA	NA	NA	NA	15520	15521	0.000853241	7072	7073	0.000392042	NA	NA	NA	NA	NA	NA	NA	NA	NA	2764	2765	8.43225e-05	1534	1535
AFKALAPL	GCCTTCAAGGCTCTAGCGCCCTTG	Pool 13	86	87	9.41614e-06	2	3	1.59622e-07	NA	1	1.63029e-08	NA	1	1.61867e-08	NA	NA	NA	NA	NA	NA	NA	NA	NA	NA	NA	NA	NA	NA	NA	174	175	9.62033e-06	128	129	7.15021e-06	NA	NA	NA	NA	NA	NA	NA	NA	NA	NA	1	3.04964e-08	10	11
AFLFYGLL	GCATTCCTGTTTTACGGATTGCTA	Pool 13	2117	2118	0.000229234	88	89	4.73544e-06	46	47	7.66235e-07	306	307	4.96933e-06	NA	NA	NA	NA	NA	NA	NA	NA	NA	NA	NA	NA	NA	NA	NA	2358	2359	0.000129682	2374	2375	0.000131641	NA	NA	NA	NA	NA	NA	NA	NA	NA	100	101	3.08014e-06	57	58
AFLYLALM	GCATTCTTGTATCTTGCGTTAATG	Pool 13	8018	8019	0.000867908	4860	4861	0.00025864	3448	3449	5.62286e-05	3562	3563	5.76733e-05	NA	NA	NA	NA	NA	NA	NA	NA	NA	NA	NA	NA	NA	NA	NA	16160	16161	0.000888424	16228	16229	0.00089954	NA	NA	NA	NA	NA	NA	NA	NA	NA	2871	2872	8.75856e-05	3250	3251
AFQFWIHL	GCGTTCCAATTTTGGATCCATTTG	Pool 13	1023	1024	0.000110829	3178	3179	0.000169146	78	79	1.28793e-06	1012	1013	1.63972e-05	NA	NA	NA	NA	NA	NA	NA	NA	NA	NA	NA	NA	NA	NA	NA	2720	2721	0.000149582	1778	1779	9.86063e-05	NA	NA	NA	NA	NA	NA	NA	NA	NA	1106	1107	3.37595e-05	225	226
AFQMFLAL	GCGTTTCAGATGTTTCTAGCCCTG	Pool 13	1070	1071	0.000115916	694	695	3.6979e-05	634	635	1.03523e-05	1368	1369	2.21596e-05	NA	NA	NA	NA	NA	NA	NA	NA	NA	NA	NA	NA	NA	NA	NA	2900	2901	0.000159478	6518	6519	0.000361335	NA	NA	NA	NA	NA	NA	NA	NA	NA	10869	10870	0.000331496	1541	1542
AFRFLSPL	GCATTCAGGTTCCTGTCCCCGTTA	Pool 13	93	94	1.01738e-05	46	47	2.50074e-06	60	61	9.94476e-07	6	7	1.13307e-07	NA	NA	NA	NA	NA	NA	NA	NA	NA	NA	NA	NA	NA	NA	NA	644	645	3.54578e-05	118	119	6.59593e-06	NA	NA	NA	NA	NA	NA	NA	NA	NA	29	30	9.14892e-07	NA	1
AFRHHSYL	GCCTTCCGGCATCACTCTTACTTA	Pool 13	2531	2532	0.000274042	3168	3169	0.000168614	882	883	1.43954e-05	734	735	1.18972e-05	NA	NA	NA	NA	NA	NA	NA	NA	NA	NA	NA	NA	NA	NA	NA	6816	6817	0.000374753	8006	8007	0.000443812	NA	NA	NA	NA	NA	NA	NA	NA	NA	2471	2472	7.53871e-05	1843	1844
AFRHSSSL	GCTTTTAGGCACTCGTCCAGTCTG	Pool 13	261	262	2.83566e-05	176	177	9.41767e-06	434	435	7.09175e-06	78	79	1.27875e-06	NA	NA	NA	NA	NA	NA	NA	NA	NA	NA	NA	NA	NA	NA	NA	1124	1125	6.1845e-05	1036	1037	5.74788e-05	NA	NA	NA	NA	NA	NA	NA	NA	NA	496	497	1.51567e-05	247	248
AFSQHSNL	GCGTTCTCACAGCACAGTAACCTC	Pool 13	3153	3154	0.000341362	64062	64063	0.00340861	6874	6875	0.000112082	18294	18295	0.000296136	NA	NA	NA	NA	NA	NA	NA	NA	NA	NA	NA	NA	NA	NA	NA	8736	8737	0.000480302	7074	7075	0.000392153	NA	NA	NA	NA	NA	NA	NA	NA	NA	20305	20306	0.00061926	131620	131621
AFSQYSVL	GCTTTCTCTCAATATTCAGTGTTG	Pool 13	3424	3425	0.000370693	1942	1943	0.000103382	2548	2549	4.1556e-05	4462	4463	7.22414e-05	NA	NA	NA	NA	NA	NA	NA	NA	NA	NA	NA	NA	NA	NA	NA	9462	9463	0.000520212	7496	7497	0.000415543	NA	NA	NA	NA	NA	NA	NA	NA	NA	1052	1053	3.21127e-05	1005	1006
AFTNYSTL	GCCTTCACCAATTACTCAACACTC	Pool 13	2347	2348	0.000254127	682	683	3.63405e-05	176	177	2.88561e-06	2682	2683	4.3429e-05	NA	NA	NA	NA	NA	NA	NA	NA	NA	NA	NA	NA	NA	NA	NA	4970	4971	0.000273272	3868	3869	0.000214451	NA	NA	NA	NA	NA	NA	NA	NA	NA	451	452	1.37844e-05	730	731
AFTWQSQL	GCTTTCACGTGGCAGTCTCAGCTC	Pool 13	2065	2066	0.000223606	2552	2553	0.000135838	7458	7459	0.000121603	1918	1919	3.10623e-05	NA	NA	NA	NA	NA	NA	NA	NA	NA	NA	NA	NA	NA	NA	NA	5042	5043	0.00027723	9372	9373	0.000519526	NA	NA	NA	NA	NA	NA	NA	NA	NA	2153	2154	6.56892e-05	3704	3705
AFTYLSAL	GCGTTTACATATCTCAGTGCACTA	Pool 13	4937	4938	0.000534447	1724	1725	9.17824e-05	676	677	1.10371e-05	398	399	6.4585e-06	NA	NA	NA	NA	NA	NA	NA	NA	NA	NA	NA	NA	NA	NA	NA	7278	7279	0.000400151	22298	22299	0.00123599	NA	NA	NA	NA	NA	NA	NA	NA	NA	919	920	2.80567e-05	704	705
AFTYPASL	GCCTTTACGTATCCAGCATCTCTC	Pool 13	1181	1182	0.00012793	258	259	1.37807e-05	52	53	8.64053e-07	362	363	5.87578e-06	NA	NA	NA	NA	NA	NA	NA	NA	NA	NA	NA	NA	NA	NA	NA	2660	2661	0.000146284	3310	3311	0.000183522	NA	NA	NA	NA	NA	NA	NA	NA	NA	121	122	3.72056e-06	365	366
AFVHFLGI	GCTTTTGTACACTTTCTTGGTATC	Pool 13	39127	39128	0.00423488	151262	151263	0.00804828	62014	62015	0.00101102	103298	103299	0.00167207	NA	NA	NA	NA	NA	NA	NA	NA	NA	NA	NA	NA	NA	NA	NA	47628	47629	0.00261832	30528	30529	0.00169216	NA	NA	NA	NA	NA	NA	NA	NA	NA	64339	64340	0.00196214	111843	111844
AFVYLSKL	GCTTTCGTTTATCTCTCTAAGTTG	Pool 13	1302	1303	0.000141026	2484	2485	0.00013222	1436	1437	2.34272e-05	420	421	6.81461e-06	NA	NA	NA	NA	NA	NA	NA	NA	NA	NA	NA	NA	NA	NA	NA	3338	3339	0.000183556	4544	4545	0.00025192	NA	NA	NA	NA	NA	NA	NA	NA	NA	1464	1465	4.46772e-05	1468	1469
AFYFSATV	GCGTTTTATTTCTCTGCAACTGTC	Pool 13	1798	1799	0.000194708	312	313	1.66539e-05	248	249	4.05942e-06	494	495	8.01243e-06	NA	NA	NA	NA	NA	NA	NA	NA	NA	NA	NA	NA	NA	NA	NA	3210	3211	0.000176519	4316	4317	0.000239282	NA	NA	NA	NA	NA	NA	NA	NA	NA	7415	7416	0.000226161	355	356
AGALFVHI	GCGGGAGCCCTCTTTGTACATATT	Pool 13	1627	1628	0.000176201	408	409	2.17617e-05	2170	2171	3.53936e-05	2730	2731	4.4206e-05	NA	NA	NA	NA	NA	NA	NA	NA	NA	NA	NA	NA	NA	NA	NA	5226	5227	0.000287345	2934	2935	0.000162681	NA	NA	NA	NA	NA	NA	NA	NA	NA	120	121	3.69006e-06	316	317
AGFALQNI	GCCGGGTTTGCCCTTCAAAACATA	Pool 13	52	53	5.73627e-06	4	5	2.66036e-07	NA	1	1.63029e-08	NA	1	1.61867e-08	NA	NA	NA	NA	NA	NA	NA	NA	NA	NA	NA	NA	NA	NA	NA	102	103	5.66225e-06	190	191	1.05867e-05	NA	NA	NA	NA	NA	NA	NA	NA	NA	2	3	9.14892e-08	41	42
AGFFRFFA	GCAGGATTCTTTCGTTTCTTTGCG	Pool 13	6315	6316	0.00068359	7522	7523	0.000400278	250	251	4.09202e-06	120	121	1.95859e-06	NA	NA	NA	NA	NA	NA	NA	NA	NA	NA	NA	NA	NA	NA	NA	14472	14473	0.000795629	3160	3161	0.000175208	NA	NA	NA	NA	NA	NA	NA	NA	NA	288	289	8.81346e-06	369	370
AGFLYTIL	GCAGGTTTTCTCTACACGATCCTT	Pool 13	406	407	4.40502e-05	210	211	1.12267e-05	26	27	4.40178e-07	1038	1039	1.6818e-05	NA	NA	NA	NA	NA	NA	NA	NA	NA	NA	NA	NA	NA	NA	NA	1010	1011	5.5578e-05	818	819	4.53955e-05	NA	NA	NA	NA	NA	NA	NA	NA	NA	133	134	4.08652e-06	344	345
AGFQFPFT	GCTGGTTTCCAGTTCCCCTTTACT	Pool 13	706	707	7.65196e-05	36	37	1.96867e-06	44	45	7.3363e-07	138	139	2.24996e-06	NA	NA	NA	NA	NA	NA	NA	NA	NA	NA	NA	NA	NA	NA	NA	1190	1191	6.54732e-05	848	849	4.70583e-05	NA	NA	NA	NA	NA	NA	NA	NA	NA	249	250	7.6241e-06	75	76
AGFRALGL	GCGGGTTTCAGGGCTCTAGGTTTG	Pool 13	1551	1552	0.000167975	1872	1873	9.96571e-05	414	415	6.7657e-06	1348	1349	2.18359e-05	NA	NA	NA	NA	NA	NA	NA	NA	NA	NA	NA	NA	NA	NA	NA	2178	2179	0.000119787	1742	1743	9.66109e-05	NA	NA	NA	NA	NA	NA	NA	NA	NA	762	763	2.32687e-05	572	573
AGHRFPEL	GCTGGGCATAGGTTTCCAGAATTG	Pool 13	14953	14954	0.00161849	1432	1433	7.62459e-05	616	617	1.00589e-05	2466	2467	3.99327e-05	NA	NA	NA	NA	NA	NA	NA	NA	NA	NA	NA	NA	NA	NA	NA	8204	8205	0.000451056	6254	6255	0.000346702	NA	NA	NA	NA	NA	NA	NA	NA	NA	256	257	7.83757e-06	314	315
AGHVLAAL	GCGGGGCACGTTCTTGCGGCTCTC	Pool 13	311	312	3.37682e-05	130	131	6.97014e-06	46	47	7.66235e-07	152	153	2.47657e-06	NA	NA	NA	NA	NA	NA	NA	NA	NA	NA	NA	NA	NA	NA	NA	614	615	3.38086e-05	1448	1449	8.03151e-05	NA	NA	NA	NA	NA	NA	NA	NA	NA	197	198	6.03829e-06	14	15
AGIFYFIL	GCGGGAATATTCTATTTCATTCTG	Pool 13	569	570	6.16919e-05	734	735	3.91073e-05	396	397	6.47224e-06	66	67	1.08451e-06	NA	NA	NA	NA	NA	NA	NA	NA	NA	NA	NA	NA	NA	NA	NA	1500	1501	8.25149e-05	786	787	4.36218e-05	NA	NA	NA	NA	NA	NA	NA	NA	NA	162	163	4.97091e-06	145	146
AGLIYASI	GCTGGACTCATATATGCTTCGATC	Pool 13	1003	1004	0.000108664	276	277	1.47384e-05	56	57	9.29264e-07	352	353	5.71391e-06	NA	NA	NA	NA	NA	NA	NA	NA	NA	NA	NA	NA	NA	NA	NA	2620	2621	0.000144085	1386	1387	7.68786e-05	NA	NA	NA	NA	NA	NA	NA	NA	NA	2632	2633	8.0297e-05	744	745
AGMTFTTF	GCAGGTATGACCTTTACCACTTTC	Pool 13	1074	1075	0.000116349	164	165	8.77919e-06	26	27	4.40178e-07	30	31	5.01789e-07	NA	NA	NA	NA	NA	NA	NA	NA	NA	NA	NA	NA	NA	NA	NA	444	445	2.44631e-05	390	391	2.16723e-05	NA	NA	NA	NA	NA	NA	NA	NA	NA	5	6	1.82978e-07	15	16
AGPHFVAV	GCGGGTCCTCACTTTGTCGCGGTG	Pool 13	NA	1	1.08231e-07	NA	1	5.32072e-08	NA	1	1.63029e-08	NA	1	1.61867e-08	NA	NA	NA	NA	NA	NA	NA	NA	NA	NA	NA	NA	NA	NA	NA	14	15	8.246e-07	NA	1	5.5428e-08	NA	NA	NA	NA	NA	NA	NA	NA	NA	NA	1	3.04964e-08	NA	1
AGRLFVSV	GCAGGTCGCTTATTTGTAAGCGTC	Pool 13	727	728	7.87925e-05	316	317	1.68667e-05	20	21	3.42361e-07	7616	7617	0.000123294	NA	NA	NA	NA	NA	NA	NA	NA	NA	NA	NA	NA	NA	NA	NA	1270	1271	6.98711e-05	1298	1299	7.20009e-05	NA	NA	NA	NA	NA	NA	NA	NA	NA	104	105	3.20212e-06	211	212
AGRPWALL	GCGGGACGGCCTTGGGCGCTGCTC	Pool 13	69	70	7.5762e-06	38	39	2.07508e-06	NA	1	1.63029e-08	2	3	4.85602e-08	NA	NA	NA	NA	NA	NA	NA	NA	NA	NA	NA	NA	NA	NA	NA	42	43	2.36385e-06	100	101	5.59822e-06	NA	NA	NA	NA	NA	NA	NA	NA	NA	NA	1	3.04964e-08	1	2
AGRRYLGI	GCAGGTCGTCGATATCTTGGTATA	Pool 13	1636	1637	0.000177175	512	513	2.72953e-05	244	245	3.99421e-06	204	205	3.31828e-06	NA	NA	NA	NA	NA	NA	NA	NA	NA	NA	NA	NA	NA	NA	NA	4818	4819	0.000264916	4454	4455	0.000246932	NA	NA	NA	NA	NA	NA	NA	NA	NA	1018	1019	3.10758e-05	1199	1200
AGSLFPLL	GCTGGGTCCCTGTTCCCGCTATTA	Pool 13	21	22	2.38109e-06	128	129	6.86373e-06	222	223	3.63554e-06	NA	1	1.61867e-08	NA	NA	NA	NA	NA	NA	NA	NA	NA	NA	NA	NA	NA	NA	NA	54	55	3.02353e-06	72	73	4.04624e-06	NA	NA	NA	NA	NA	NA	NA	NA	NA	81	82	2.5007e-06	NA	1
AGVLLATL	GCAGGTGTGCTGCTAGCAACGCTC	Pool 13	94	95	1.0282e-05	20	21	1.11735e-06	NA	1	1.63029e-08	NA	1	1.61867e-08	NA	NA	NA	NA	NA	NA	NA	NA	NA	NA	NA	NA	NA	NA	NA	230	231	1.26988e-05	104	105	5.81994e-06	NA	NA	NA	NA	NA	NA	NA	NA	NA	68	69	2.10425e-06	10	11
AGVRYLDL	GCCGGTGTCCGTTATCTTGATTTA	Pool 13	3201	3202	0.000346557	2394	2395	0.000127431	508	509	8.29817e-06	392	393	6.36138e-06	NA	NA	NA	NA	NA	NA	NA	NA	NA	NA	NA	NA	NA	NA	NA	2896	2897	0.000159258	2324	2325	0.00012887	NA	NA	NA	NA	NA	NA	NA	NA	NA	4810	4811	0.000146718	8261	8262
AGWAQAVL	GCGGGCTGGGCGCAAGCTGTTTTG	Pool 13	131	132	1.42866e-05	106	107	5.69317e-06	4	5	8.15144e-08	4	5	8.09336e-08	NA	NA	NA	NA	NA	NA	NA	NA	NA	NA	NA	NA	NA	NA	NA	568	569	3.12798e-05	86	87	4.82223e-06	NA	NA	NA	NA	NA	NA	NA	NA	NA	4	5	1.52482e-07	NA	1
AGWQFKPM	GCAGGATGGCAGTTTAAACCAATG	Pool 13	334	335	3.62575e-05	118	119	6.33166e-06	198	199	3.24427e-06	140	141	2.28233e-06	NA	NA	NA	NA	NA	NA	NA	NA	NA	NA	NA	NA	NA	NA	NA	728	729	4.00755e-05	902	903	5.00514e-05	NA	NA	NA	NA	NA	NA	NA	NA	NA	541	542	1.6529e-05	79	80
AGWVVGSL	GCGGGATGGGTTGTTGGGTCTTTA	Pool 13	2033	2034	0.000220143	294	295	1.56961e-05	172	173	2.8204e-06	338	339	5.4873e-06	NA	NA	NA	NA	NA	NA	NA	NA	NA	NA	NA	NA	NA	NA	NA	3292	3293	0.000181027	8144	8145	0.000451461	NA	NA	NA	NA	NA	NA	NA	NA	NA	102	103	3.14113e-06	344	345
AGYFHKAV	GCCGGGTATTTTCATAAAGCGGTC	Pool 13	730	731	7.91172e-05	116	117	6.22524e-06	244	245	3.99421e-06	700	701	1.13469e-05	NA	NA	NA	NA	NA	NA	NA	NA	NA	NA	NA	NA	NA	NA	NA	1936	1937	0.000106483	1880	1881	0.00010426	NA	NA	NA	NA	NA	NA	NA	NA	NA	53	54	1.64681e-06	137	138
AGYFYNGT	GCGGGTTATTTCTATAATGGTACG	Pool 13	4356	4357	0.000471565	786	787	4.18741e-05	536	537	8.75465e-06	2044	2045	3.31019e-05	NA	NA	NA	NA	NA	NA	NA	NA	NA	NA	NA	NA	NA	NA	NA	4498	4499	0.000247325	6216	6217	0.000344596	NA	NA	NA	NA	NA	NA	NA	NA	NA	608	609	1.85723e-05	3508	3509
AGYHMECL	GCCGGATATCATATGGAATGCCTG	Pool 13	338	339	3.66905e-05	40	41	2.18149e-06	156	157	2.55955e-06	8	9	1.45681e-07	NA	NA	NA	NA	NA	NA	NA	NA	NA	NA	NA	NA	NA	NA	NA	460	461	2.53427e-05	366	367	2.03421e-05	NA	NA	NA	NA	NA	NA	NA	NA	NA	17	18	5.48935e-07	72	73
AGYIPLNL	GCAGGGTACATCCCGTTAAACCTC	Pool 13	479	480	5.19511e-05	126	127	6.75731e-06	8	9	1.46726e-07	124	125	2.02334e-06	NA	NA	NA	NA	NA	NA	NA	NA	NA	NA	NA	NA	NA	NA	NA	1260	1261	6.93213e-05	1370	1371	7.59917e-05	NA	NA	NA	NA	NA	NA	NA	NA	NA	533	534	1.62851e-05	2	3
AGYPMGPF	GCAGGTTACCCAATGGGCCCTTTT	Pool 13	225	226	2.44603e-05	126	127	6.75731e-06	166	167	2.72258e-06	6710	6711	0.000108629	NA	NA	NA	NA	NA	NA	NA	NA	NA	NA	NA	NA	NA	NA	NA	848	849	4.66723e-05	560	561	3.10951e-05	NA	NA	NA	NA	NA	NA	NA	NA	NA	709	710	2.16524e-05	144	145
AGYRKCSV	GCTGGTTATCGTAAATGCTCCGTC	Pool 13	2998	2999	0.000324586	2732	2733	0.000145415	874	875	1.4265e-05	10030	10031	0.000162369	NA	NA	NA	NA	NA	NA	NA	NA	NA	NA	NA	NA	NA	NA	NA	10512	10513	0.000577934	10194	10195	0.000565088	NA	NA	NA	NA	NA	NA	NA	NA	NA	1149	1150	3.50708e-05	1157	1158
AGYTYCGS	GCTGGCTATACATATTGCGGTTCG	Pool 13	5301	5302	0.000573843	11940	11941	0.000635347	9182	9183	0.000149709	41406	41407	0.000670244	NA	NA	NA	NA	NA	NA	NA	NA	NA	NA	NA	NA	NA	NA	NA	15040	15041	0.000826853	10282	10283	0.000569966	NA	NA	NA	NA	NA	NA	NA	NA	NA	47575	47576	0.0014509	6109	6110
AHFLAKSL	GCACACTTCCTCGCCAAGAGCCTC	Pool 13	10	11	1.19055e-06	NA	1	5.32072e-08	NA	1	1.63029e-08	NA	1	1.61867e-08	NA	NA	NA	NA	NA	NA	NA	NA	NA	NA	NA	NA	NA	NA	NA	18	19	1.04449e-06	NA	1	5.5428e-08	NA	NA	NA	NA	NA	NA	NA	NA	NA	NA	1	3.04964e-08	NA	1
AHITFAIL	GCCCACATTACCTTCGCTATTCTA	Pool 13	183	184	1.99146e-05	168	169	8.99202e-06	14	15	2.44543e-07	84	85	1.37587e-06	NA	NA	NA	NA	NA	NA	NA	NA	NA	NA	NA	NA	NA	NA	NA	332	333	1.83061e-05	98	99	5.48737e-06	NA	NA	NA	NA	NA	NA	NA	NA	NA	5	6	1.82978e-07	2	3
AHKFFLFL	GCGCACAAATTCTTTCTCTTTCTC	Pool 13	8113	8114	0.00087819	6016	6017	0.000320148	4182	4183	6.8195e-05	7232	7233	0.000117079	NA	NA	NA	NA	NA	NA	NA	NA	NA	NA	NA	NA	NA	NA	NA	26558	26559	0.00146004	14598	14599	0.000809193	NA	NA	NA	NA	NA	NA	NA	NA	NA	2828	2829	8.62743e-05	2534	2535
AHPLYLLL	GCTCACCCTCTGTACTTGCTACTA	Pool 13	56	57	6.16919e-06	4	5	2.66036e-07	NA	1	1.63029e-08	NA	1	1.61867e-08	NA	NA	NA	NA	NA	NA	NA	NA	NA	NA	NA	NA	NA	NA	NA	156	157	8.63081e-06	294	295	1.63512e-05	NA	NA	NA	NA	NA	NA	NA	NA	NA	8	9	2.74468e-07	25	26
AIATYWAL	GCCATAGCTACCTATTGGGCTCTA	Pool 13	129	130	1.40701e-05	186	187	9.94974e-06	4	5	8.15144e-08	18	19	3.07548e-07	NA	NA	NA	NA	NA	NA	NA	NA	NA	NA	NA	NA	NA	NA	NA	344	345	1.89658e-05	372	373	2.06746e-05	NA	NA	NA	NA	NA	NA	NA	NA	NA	15	16	4.87942e-07	2	3
AICYISYL	GCAATTTGCTATATATCATACTTA	Pool 13	1116	1117	0.000120895	340	341	1.81437e-05	66	67	1.09229e-06	340	341	5.51967e-06	NA	NA	NA	NA	NA	NA	NA	NA	NA	NA	NA	NA	NA	NA	NA	1608	1609	8.8452e-05	1970	1971	0.000109248	NA	NA	NA	NA	NA	NA	NA	NA	NA	21	22	6.70921e-07	167	168
AIESFALM	GCAATTGAGTCCTTCGCATTGATG	Pool 13	4407	4408	0.000477084	2882	2883	0.000153396	2586	2587	4.21756e-05	3562	3563	5.76733e-05	NA	NA	NA	NA	NA	NA	NA	NA	NA	NA	NA	NA	NA	NA	NA	12176	12177	0.00066941	9374	9375	0.000519637	NA	NA	NA	NA	NA	NA	NA	NA	NA	1834	1835	5.59609e-05	10938	10939
AIFFGKFL	GCGATCTTCTTTGGCAAGTTCCTT	Pool 13	647	648	7.0134e-05	1092	1093	5.81555e-05	752	753	1.22761e-05	9458	9459	0.00015311	NA	NA	NA	NA	NA	NA	NA	NA	NA	NA	NA	NA	NA	NA	NA	1524	1525	8.38343e-05	1072	1073	5.94742e-05	NA	NA	NA	NA	NA	NA	NA	NA	NA	1405	1406	4.28779e-05	1506	1507
AIFGYLTF	GCAATATTCGGGTATCTTACATTT	Pool 13	22415	22416	0.00242612	20456	20457	0.00108846	12652	12653	0.00020628	121396	121397	0.00196502	NA	NA	NA	NA	NA	NA	NA	NA	NA	NA	NA	NA	NA	NA	NA	69002	69003	0.00379332	47004	47005	0.00260539	NA	NA	NA	NA	NA	NA	NA	NA	NA	20002	20003	0.000610019	39925	39926
AIFLPPNL	GCCATCTTCTTGCCACCGAATCTC	Pool 13	960	961	0.00010401	5130	5131	0.000273006	8088	8089	0.000131874	36514	36515	0.000591058	NA	NA	NA	NA	NA	NA	NA	NA	NA	NA	NA	NA	NA	NA	NA	2740	2741	0.000150682	1474	1475	8.17562e-05	NA	NA	NA	NA	NA	NA	NA	NA	NA	4793	4794	0.0001462	9019	9020
AIFLRNLM	GCTATCTTCCTGAGGAATCTCATG	Pool 13	2618	2619	0.000283458	2522	2523	0.000134242	1834	1835	2.99158e-05	2488	2489	4.02888e-05	NA	NA	NA	NA	NA	NA	NA	NA	NA	NA	NA	NA	NA	NA	NA	10072	10073	0.000553746	5222	5223	0.0002895	NA	NA	NA	NA	NA	NA	NA	NA	NA	1773	1774	5.41006e-05	838	839
AIFQHWVL	GCGATCTTCCAGCATTGGGTACTA	Pool 13	628	629	6.80776e-05	526	527	2.80402e-05	110	111	1.80962e-06	304	305	4.93695e-06	NA	NA	NA	NA	NA	NA	NA	NA	NA	NA	NA	NA	NA	NA	NA	1922	1923	0.000105714	1304	1305	7.23335e-05	NA	NA	NA	NA	NA	NA	NA	NA	NA	53	54	1.64681e-06	238	239
AIFRKFDV	GCGATTTTCCGCAAGTTTGACGTC	Pool 13	837	838	9.0698e-05	256	257	1.36742e-05	108	109	1.77701e-06	9528	9529	0.000154243	NA	NA	NA	NA	NA	NA	NA	NA	NA	NA	NA	NA	NA	NA	NA	2308	2309	0.000126933	2038	2039	0.000113018	NA	NA	NA	NA	NA	NA	NA	NA	NA	84	85	2.59219e-06	176	177
AIFVFLHI	GCCATCTTTGTATTTCTCCATATC	Pool 13	1162	1163	0.000125873	1112	1113	5.92196e-05	150	151	2.46174e-06	1494	1495	2.41992e-05	NA	NA	NA	NA	NA	NA	NA	NA	NA	NA	NA	NA	NA	NA	NA	3568	3569	0.0001962	6028	6029	0.000334175	NA	NA	NA	NA	NA	NA	NA	NA	NA	516	517	1.57666e-05	470	471
AIHRLLAL	GCTATTCATAGACTCCTCGCACTA	Pool 13	1126	1127	0.000121977	640	641	3.41058e-05	202	203	3.30948e-06	6444	6445	0.000104323	NA	NA	NA	NA	NA	NA	NA	NA	NA	NA	NA	NA	NA	NA	NA	3164	3165	0.000173991	2406	2407	0.000133415	NA	NA	NA	NA	NA	NA	NA	NA	NA	583	584	1.78099e-05	300	301
AIIAFKTL	GCGATTATTGCATTTAAAACCCTC	Pool 13	2047	2048	0.000221658	956	957	5.09193e-05	7716	7717	0.000125809	1008	1009	1.63324e-05	NA	NA	NA	NA	NA	NA	NA	NA	NA	NA	NA	NA	NA	NA	NA	5236	5237	0.000287895	1886	1887	0.000104593	NA	NA	NA	NA	NA	NA	NA	NA	NA	903	904	2.75687e-05	765	766
AIKVYCNM	GCAATCAAAGTCTATTGTAACATG	Pool 13	895	896	9.69754e-05	366	367	1.9527e-05	1004	1005	1.63844e-05	696	697	1.12821e-05	NA	NA	NA	NA	NA	NA	NA	NA	NA	NA	NA	NA	NA	NA	NA	1700	1701	9.35096e-05	1844	1845	0.000102265	NA	NA	NA	NA	NA	NA	NA	NA	NA	66	67	2.04326e-06	183	184
AILALSLL	GCTATACTTGCTCTCTCTCTGTTG	Pool 13	9460	9461	0.00102398	25508	25509	0.00135726	68734	68735	0.00112058	276816	276817	0.00448076	NA	NA	NA	NA	NA	NA	NA	NA	NA	NA	NA	NA	NA	NA	NA	21340	21341	0.00117319	26428	26429	0.00146491	NA	NA	NA	NA	NA	NA	NA	NA	NA	125474	125475	0.00382653	53180	53181
AILLPAYL	GCCATATTGTTGCCCGCGTATCTA	Pool 13	1892	1893	0.000204882	808	809	4.30446e-05	558	559	9.11331e-06	822	823	1.33217e-05	NA	NA	NA	NA	NA	NA	NA	NA	NA	NA	NA	NA	NA	NA	NA	3986	3987	0.000219179	24940	24941	0.00138243	NA	NA	NA	NA	NA	NA	NA	NA	NA	412	413	1.2595e-05	5150	5151
AILLRAFL	GCGATACTCCTTAGAGCCTTCCTT	Pool 13	775	776	8.39876e-05	2572	2573	0.000136902	1324	1325	2.16013e-05	1210	1211	1.96021e-05	NA	NA	NA	NA	NA	NA	NA	NA	NA	NA	NA	NA	NA	NA	NA	2492	2493	0.000137048	1774	1775	9.83846e-05	NA	NA	NA	NA	NA	NA	NA	NA	NA	7924	7925	0.000241684	867	868
AILYFIPL	GCCATACTGTATTTTATACCCCTT	Pool 13	1291	1292	0.000139835	520	521	2.77209e-05	78	79	1.28793e-06	2284	2285	3.69867e-05	NA	NA	NA	NA	NA	NA	NA	NA	NA	NA	NA	NA	NA	NA	NA	2984	2985	0.000164095	2300	2301	0.00012754	NA	NA	NA	NA	NA	NA	NA	NA	NA	492	493	1.50347e-05	344	345
AILYYVNL	GCGATCCTTTATTACGTAAACTTG	Pool 13	3183	3184	0.000344609	5030	5031	0.000267685	1160	1161	1.89276e-05	1322	1323	2.1415e-05	NA	NA	NA	NA	NA	NA	NA	NA	NA	NA	NA	NA	NA	NA	NA	8004	8005	0.000440061	8696	8697	0.000482057	NA	NA	NA	NA	NA	NA	NA	NA	NA	4346	4347	0.000132568	5282	5283
AIPKLYSL	GCGATTCCAAAACTTTATTCGCTG	Pool 13	1265	1266	0.000137021	712	713	3.79367e-05	318	319	5.20062e-06	196	197	3.18879e-06	NA	NA	NA	NA	NA	NA	NA	NA	NA	NA	NA	NA	NA	NA	NA	3668	3669	0.000201697	7080	7081	0.000392485	NA	NA	NA	NA	NA	NA	NA	NA	NA	249	250	7.6241e-06	379	380
AIRTYLNL	GCAATTCGAACCTACTTGAATTTA	Pool 13	462	463	5.01112e-05	132	133	7.07656e-06	10	11	1.79332e-07	12	13	2.10427e-07	NA	NA	NA	NA	NA	NA	NA	NA	NA	NA	NA	NA	NA	NA	NA	1308	1309	7.19601e-05	566	567	3.14277e-05	NA	NA	NA	NA	NA	NA	NA	NA	NA	77	78	2.37872e-06	34	35
AISFFILM	GCAATATCGTTCTTCATACTAATG	Pool 13	1564	1565	0.000169382	4826	4827	0.000256831	3170	3171	5.16964e-05	1540	1541	2.49437e-05	NA	NA	NA	NA	NA	NA	NA	NA	NA	NA	NA	NA	NA	NA	NA	3786	3787	0.000208184	6786	6787	0.00037619	NA	NA	NA	NA	NA	NA	NA	NA	NA	2043	2044	6.23346e-05	1459	1460
AITLFGNL	GCAATTACCTTATTTGGGAACTTA	Pool 13	279	280	3.03048e-05	64	65	3.45847e-06	4	5	8.15144e-08	8	9	1.45681e-07	NA	NA	NA	NA	NA	NA	NA	NA	NA	NA	NA	NA	NA	NA	NA	3098	3099	0.000170362	438	439	2.43329e-05	NA	NA	NA	NA	NA	NA	NA	NA	NA	159	160	4.87942e-06	62	63
AIWRYLYL	GCCATTTGGCGTTACCTCTATTTG	Pool 13	54	55	5.95273e-06	40	41	2.18149e-06	4	5	8.15144e-08	NA	1	1.61867e-08	NA	NA	NA	NA	NA	NA	NA	NA	NA	NA	NA	NA	NA	NA	NA	112	113	6.21198e-06	74	75	4.1571e-06	NA	NA	NA	NA	NA	NA	NA	NA	NA	39	40	1.21986e-06	NA	1
AIWVLPLL	GCAATTTGGGTGTTACCGCTGCTC	Pool 13	592	593	6.41813e-05	1182	1183	6.29441e-05	34	35	5.70601e-07	124	125	2.02334e-06	NA	NA	NA	NA	NA	NA	NA	NA	NA	NA	NA	NA	NA	NA	NA	3276	3277	0.000180148	1496	1497	8.29756e-05	NA	NA	NA	NA	NA	NA	NA	NA	NA	67	68	2.07375e-06	362	363
AIYHGIPI	GCCATATACCATGGGATCCCTATA	Pool 13	873	874	9.45943e-05	428	429	2.28259e-05	32	33	5.37995e-07	212	213	3.44777e-06	NA	NA	NA	NA	NA	NA	NA	NA	NA	NA	NA	NA	NA	NA	NA	2396	2397	0.000131771	1904	1905	0.00010559	NA	NA	NA	NA	NA	NA	NA	NA	NA	109	110	3.3546e-06	35	36
AIYNMASV	GCGATTTACAATATGGCGTCAGTG	Pool 13	1826	1827	0.000197739	1366	1367	7.27342e-05	366	367	5.98316e-06	432	433	7.00885e-06	NA	NA	NA	NA	NA	NA	NA	NA	NA	NA	NA	NA	NA	NA	NA	4810	4811	0.000264477	3694	3695	0.000204806	NA	NA	NA	NA	NA	NA	NA	NA	NA	261	262	7.99005e-06	1258	1259
AIYYFKIA	GCCATTTACTATTTTAAGATAGCT	Pool 13	1263	1264	0.000136805	9836	9837	0.000523399	228	229	3.73336e-06	596	597	9.66348e-06	NA	NA	NA	NA	NA	NA	NA	NA	NA	NA	NA	NA	NA	NA	NA	22716	22717	0.00124883	2372	2373	0.000131531	NA	NA	NA	NA	NA	NA	NA	NA	NA	779	780	2.37872e-05	176	177
AKYIFLSL	GCTAAATATATCTTCTTGTCACTG	Pool 13	3516	3517	0.00038065	3804	3805	0.000202453	2770	2771	4.51753e-05	4020	4021	6.50868e-05	NA	NA	NA	NA	NA	NA	NA	NA	NA	NA	NA	NA	NA	NA	NA	7212	7213	0.000396522	6982	6983	0.000387053	NA	NA	NA	NA	NA	NA	NA	NA	NA	2587	2588	7.89247e-05	5321	5322
ALFAMAKL	GCGTTATTTGCGATGGCTAAGCTA	Pool 13	7599	7600	0.000822559	11504	11505	0.000612149	6582	6583	0.000107322	4986	4987	8.07232e-05	NA	NA	NA	NA	NA	NA	NA	NA	NA	NA	NA	NA	NA	NA	NA	26434	26435	0.00145322	18350	18351	0.00101716	NA	NA	NA	NA	NA	NA	NA	NA	NA	10020	10021	0.000305604	7812	7813
ALFAYSSF	GCCCTGTTTGCTTATTCTTCTTTT	Pool 13	3173	3174	0.000343527	1274	1275	6.78392e-05	318	319	5.20062e-06	1200	1201	1.94403e-05	NA	NA	NA	NA	NA	NA	NA	NA	NA	NA	NA	NA	NA	NA	NA	6320	6321	0.000347486	5396	5397	0.000299145	NA	NA	NA	NA	NA	NA	NA	NA	NA	1220	1221	3.72361e-05	448	449
ALFIMFAL	GCACTATTTATCATGTTTGCGTTA	Pool 13	1562	1563	0.000169166	316	317	1.68667e-05	140	141	2.29871e-06	2228	2229	3.60802e-05	NA	NA	NA	NA	NA	NA	NA	NA	NA	NA	NA	NA	NA	NA	NA	3410	3411	0.000187514	2452	2453	0.000135965	NA	NA	NA	NA	NA	NA	NA	NA	NA	2130	2131	6.49878e-05	192	193
ALFLEFNM	GCATTATTTCTGGAATTCAATATG	Pool 13	1034	1035	0.00011202	924	925	4.92167e-05	120	121	1.97265e-06	150	151	2.4442e-06	NA	NA	NA	NA	NA	NA	NA	NA	NA	NA	NA	NA	NA	NA	NA	2140	2141	0.000117698	1416	1417	7.85414e-05	NA	NA	NA	NA	NA	NA	NA	NA	NA	149	150	4.57446e-06	464	465
ALFLSLQL	GCCTTATTCCTGTCTCTGCAGCTT	Pool 13	451	452	4.89206e-05	60	61	3.24564e-06	86	87	1.41835e-06	94	95	1.53774e-06	NA	NA	NA	NA	NA	NA	NA	NA	NA	NA	NA	NA	NA	NA	NA	1068	1069	5.87665e-05	1202	1203	6.66798e-05	NA	NA	NA	NA	NA	NA	NA	NA	NA	171	172	5.24538e-06	169	170
ALFYRHYL	GCACTTTTCTACCGACACTATCTG	Pool 13	1929	1930	0.000208887	504	505	2.68696e-05	1232	1233	2.01015e-05	426	427	6.91173e-06	NA	NA	NA	NA	NA	NA	NA	NA	NA	NA	NA	NA	NA	NA	NA	5720	5721	0.000314502	5098	5099	0.000282627	NA	NA	NA	NA	NA	NA	NA	NA	NA	979	980	2.98865e-05	1849	1850
ALGSYATL	GCTCTCGGCTCATATGCCACTCTC	Pool 13	782	783	8.47452e-05	12	13	6.91693e-07	NA	1	1.63029e-08	4	5	8.09336e-08	NA	NA	NA	NA	NA	NA	NA	NA	NA	NA	NA	NA	NA	NA	NA	506	507	2.78715e-05	264	265	1.46884e-05	NA	NA	NA	NA	NA	NA	NA	NA	NA	NA	1	3.04964e-08	17	18
ALIELANL	GCCCTAATCGAACTGGCCAATCTT	Pool 13	158	159	1.72088e-05	302	303	1.61218e-05	34	35	5.70601e-07	190	191	3.09166e-06	NA	NA	NA	NA	NA	NA	NA	NA	NA	NA	NA	NA	NA	NA	NA	500	501	2.75416e-05	316	317	1.75707e-05	NA	NA	NA	NA	NA	NA	NA	NA	NA	12	13	3.96453e-07	11	12
ALIKYHTL	GCACTTATAAAGTATCATACCCTG	Pool 13	1743	1744	0.000188756	47286	47287	0.00251601	438	439	7.15696e-06	14978	14979	0.000242461	NA	NA	NA	NA	NA	NA	NA	NA	NA	NA	NA	NA	NA	NA	NA	6364	6365	0.000349905	4966	4967	0.000275311	NA	NA	NA	NA	NA	NA	NA	NA	NA	33925	33926	0.00103462	4362	4363
ALLLFRHL	GCTTTACTGTTATTCCGTCATCTT	Pool 13	5019	5020	0.000543322	28836	28837	0.00153434	18632	18633	0.000303772	16158	16159	0.000261561	NA	NA	NA	NA	NA	NA	NA	NA	NA	NA	NA	NA	NA	NA	NA	27050	27051	0.00148708	32472	32473	0.00179991	NA	NA	NA	NA	NA	NA	NA	NA	NA	24799	24800	0.000756311	37297	37298
ALQYVAPL	GCTCTGCAATATGTAGCGCCTCTC	Pool 13	23	24	2.59756e-06	NA	1	5.32072e-08	NA	1	1.63029e-08	40	41	6.63656e-07	NA	NA	NA	NA	NA	NA	NA	NA	NA	NA	NA	NA	NA	NA	NA	128	129	7.09156e-06	NA	1	5.5428e-08	NA	NA	NA	NA	NA	NA	NA	NA	NA	128	129	3.93403e-06	NA	1
ALTRFSHL	GCACTGACGCGGTTCTCCCATCTT	Pool 13	686	687	7.4355e-05	110	111	5.906e-06	8	9	1.46726e-07	56	57	9.22643e-07	NA	NA	NA	NA	NA	NA	NA	NA	NA	NA	NA	NA	NA	NA	NA	626	627	3.44683e-05	1198	1199	6.64581e-05	NA	NA	NA	NA	NA	NA	NA	NA	NA	15	16	4.87942e-07	21	22
ALVVFAYI	GCCTTAGTCGTATTTGCTTATATA	Pool 13	1009	1010	0.000109314	900	901	4.79397e-05	274	275	4.48329e-06	614	615	9.95484e-06	NA	NA	NA	NA	NA	NA	NA	NA	NA	NA	NA	NA	NA	NA	NA	1998	1999	0.000109892	1822	1823	0.000101045	NA	NA	NA	NA	NA	NA	NA	NA	NA	210	211	6.43474e-06	282	283
ALYDYMPM	GCATTGTATGACTATATGCCCATG	Pool 13	102	103	1.11478e-05	48	49	2.60715e-06	118	119	1.94004e-06	2	3	4.85602e-08	NA	NA	NA	NA	NA	NA	NA	NA	NA	NA	NA	NA	NA	NA	NA	288	289	1.58873e-05	1460	1461	8.09802e-05	NA	NA	NA	NA	NA	NA	NA	NA	NA	6	7	2.13475e-07	24	25
ALYFVALM	GCTTTGTACTTTGTGGCACTGATG	Pool 13	2370	2371	0.000256617	3268	3269	0.000173934	856	857	1.39716e-05	15028	15029	0.00024327	NA	NA	NA	NA	NA	NA	NA	NA	NA	NA	NA	NA	NA	NA	NA	5662	5663	0.000311314	4554	4555	0.000252474	NA	NA	NA	NA	NA	NA	NA	NA	NA	4852	4853	0.000147999	658	659
ALYNLLAL	GCTCTTTACAACCTACTTGCCCTG	Pool 13	338	339	3.66905e-05	188	189	1.00562e-05	582	583	9.50458e-06	1180	1181	1.91165e-05	NA	NA	NA	NA	NA	NA	NA	NA	NA	NA	NA	NA	NA	NA	NA	898	899	4.9421e-05	942	943	5.22686e-05	NA	NA	NA	NA	NA	NA	NA	NA	NA	351	352	1.07347e-05	148	149
ALYRGVSL	GCGCTTTACAGGGGCGTCTCATTA	Pool 13	430	431	4.66478e-05	892	893	4.7514e-05	10	11	1.79332e-07	1894	1895	3.06738e-05	NA	NA	NA	NA	NA	NA	NA	NA	NA	NA	NA	NA	NA	NA	NA	2124	2125	0.000116818	680	681	3.77464e-05	NA	NA	NA	NA	NA	NA	NA	NA	NA	3	4	1.21986e-07	39	40
ALYRKMRL	GCTCTGTATAGAAAGATGAGGTTA	Pool 13	371	372	4.02621e-05	502	503	2.67632e-05	8	9	1.46726e-07	70	71	1.14926e-06	NA	NA	NA	NA	NA	NA	NA	NA	NA	NA	NA	NA	NA	NA	NA	1088	1089	5.98659e-05	1396	1397	7.74329e-05	NA	NA	NA	NA	NA	NA	NA	NA	NA	54	55	1.6773e-06	46	47
ALYRYFSR	GCCCTTTATCGCTACTTTTCCCGG	Pool 13	757	758	8.20395e-05	914	915	4.86846e-05	52	53	8.64053e-07	1996	1997	3.23249e-05	NA	NA	NA	NA	NA	NA	NA	NA	NA	NA	NA	NA	NA	NA	NA	2928	2929	0.000161017	1754	1755	9.72761e-05	NA	NA	NA	NA	NA	NA	NA	NA	NA	2773	2774	8.4597e-05	298	299
ALYTHCLF	GCGCTCTATACGCATTGTCTCTTC	Pool 13	6054	6055	0.000655342	4660	4661	0.000247999	1052	1053	1.71669e-05	4640	4641	7.51226e-05	NA	NA	NA	NA	NA	NA	NA	NA	NA	NA	NA	NA	NA	NA	NA	14714	14715	0.000808932	10436	10437	0.000578502	NA	NA	NA	NA	NA	NA	NA	NA	NA	2409	2410	7.34963e-05	1702	1703
AMFFAPTM	GCAATGTTCTTTGCACCCACTATG	Pool 13	873	874	9.45943e-05	866	867	4.61306e-05	362	363	5.91795e-06	728	729	1.18001e-05	NA	NA	NA	NA	NA	NA	NA	NA	NA	NA	NA	NA	NA	NA	NA	2494	2495	0.000137158	2024	2025	0.000112242	NA	NA	NA	NA	NA	NA	NA	NA	NA	209	210	6.40424e-06	811	812
AMFLHFSL	GCTATGTTCTTACACTTTTCCTTA	Pool 13	11260	11261	0.00121879	4256	4257	0.000226503	2580	2581	4.20777e-05	7614	7615	0.000123262	NA	NA	NA	NA	NA	NA	NA	NA	NA	NA	NA	NA	NA	NA	NA	13360	13361	0.000734498	17106	17107	0.000948206	NA	NA	NA	NA	NA	NA	NA	NA	NA	866	867	2.64404e-05	1295	1296
AMFVLLGL	GCGATGTTTGTCCTTCTGGGTCTG	Pool 13	272	273	2.95472e-05	72	73	3.88412e-06	50	51	8.31447e-07	16	17	2.75174e-07	NA	NA	NA	NA	NA	NA	NA	NA	NA	NA	NA	NA	NA	NA	NA	710	711	3.9086e-05	522	523	2.89888e-05	NA	NA	NA	NA	NA	NA	NA	NA	NA	67	68	2.07375e-06	18	19
AMHVHGSL	GCCATGCATGTGCACGGCAGTCTC	Pool 13	1589	1590	0.000172088	810	811	4.3151e-05	150	151	2.46174e-06	1326	1327	2.14798e-05	NA	NA	NA	NA	NA	NA	NA	NA	NA	NA	NA	NA	NA	NA	NA	2456	2457	0.000135069	2606	2607	0.000144501	NA	NA	NA	NA	NA	NA	NA	NA	NA	262	263	8.02055e-06	41	42
AMLFALNI	GCCATGTTATTTGCGCTGAACATA	Pool 13	2569	2570	0.000278155	8220	8221	0.000437416	818	819	1.33521e-05	910	911	1.47461e-05	NA	NA	NA	NA	NA	NA	NA	NA	NA	NA	NA	NA	NA	NA	NA	6864	6865	0.000377392	7472	7473	0.000414213	NA	NA	NA	NA	NA	NA	NA	NA	NA	170538	170539	0.00520082	8474	8475
AMLMRVGL	GCTATGTTAATGAGGGTGGGCCTT	Pool 13	230	231	2.50015e-05	98	99	5.26751e-06	144	145	2.36392e-06	178	179	2.89742e-06	NA	NA	NA	NA	NA	NA	NA	NA	NA	NA	NA	NA	NA	NA	NA	414	415	2.28139e-05	806	807	4.47304e-05	NA	NA	NA	NA	NA	NA	NA	NA	NA	39	40	1.21986e-06	37	38
AMRSLASL	GCTATGAGGTCGCTGGCTAGCCTT	Pool 13	229	230	2.48932e-05	76	77	4.09695e-06	12	13	2.11937e-07	54	55	8.9027e-07	NA	NA	NA	NA	NA	NA	NA	NA	NA	NA	NA	NA	NA	NA	NA	434	435	2.39134e-05	518	519	2.87671e-05	NA	NA	NA	NA	NA	NA	NA	NA	NA	88	89	2.71418e-06	110	111
AMVFFVVL	GCAATGGTGTTCTTCGTCGTCTTG	Pool 13	6312	6313	0.000683265	12228	12229	0.000650671	1850	1851	3.01766e-05	12326	12327	0.000199534	NA	NA	NA	NA	NA	NA	NA	NA	NA	NA	NA	NA	NA	NA	NA	14658	14659	0.000805854	17792	17793	0.00098623	NA	NA	NA	NA	NA	NA	NA	NA	NA	1390	1391	4.24205e-05	4336	4337
AMVRCLPL	GCGATGGTTAGGTGCCTACCCCTA	Pool 13	15	16	1.7317e-06	NA	1	5.32072e-08	4	5	8.15144e-08	12	13	2.10427e-07	NA	NA	NA	NA	NA	NA	NA	NA	NA	NA	NA	NA	NA	NA	NA	14	15	8.246e-07	NA	1	5.5428e-08	NA	NA	NA	NA	NA	NA	NA	NA	NA	29	30	9.14892e-07	17	18
AMVVYLNI	GCTATGGTCGTGTACCTTAATATC	Pool 13	7895	7896	0.000854596	268	269	1.43127e-05	150	151	2.46174e-06	612	613	9.92246e-06	NA	NA	NA	NA	NA	NA	NA	NA	NA	NA	NA	NA	NA	NA	NA	5976	5977	0.000328575	3162	3163	0.000175319	NA	NA	NA	NA	NA	NA	NA	NA	NA	176	177	5.39786e-06	168	169
ANAWHHGL	GCCAATGCATGGCACCACGGTTTA	Pool 13	222	223	2.41356e-05	84	85	4.52261e-06	30	31	5.05389e-07	74	75	1.214e-06	NA	NA	NA	NA	NA	NA	NA	NA	NA	NA	NA	NA	NA	NA	NA	492	493	2.71018e-05	514	515	2.85454e-05	NA	NA	NA	NA	NA	NA	NA	NA	NA	4	5	1.52482e-07	1	2
ANCIFLNI	GCGAACTGCATTTTCTTAAATATC	Pool 13	1438	1439	0.000155745	260	261	1.38871e-05	88	89	1.45096e-06	1104	1105	1.78863e-05	NA	NA	NA	NA	NA	NA	NA	NA	NA	NA	NA	NA	NA	NA	NA	2450	2451	0.00013474	2792	2793	0.00015481	NA	NA	NA	NA	NA	NA	NA	NA	NA	40	41	1.25035e-06	324	325
ANFDKSRL	GCGAATTTCGACAAATCACGCCTT	Pool 13	109	110	1.19055e-05	60	61	3.24564e-06	12	13	2.11937e-07	2526	2527	4.09039e-05	NA	NA	NA	NA	NA	NA	NA	NA	NA	NA	NA	NA	NA	NA	NA	232	233	1.28088e-05	290	291	1.61295e-05	NA	NA	NA	NA	NA	NA	NA	NA	NA	53	54	1.64681e-06	18	19
ANFFLRLI	GCTAATTTCTTTCTCCGCCTAATA	Pool 13	574	575	6.22331e-05	850	851	4.52793e-05	134	135	2.20089e-06	254	255	4.12762e-06	NA	NA	NA	NA	NA	NA	NA	NA	NA	NA	NA	NA	NA	NA	NA	1970	1971	0.000108352	2888	2889	0.000160131	NA	NA	NA	NA	NA	NA	NA	NA	NA	25	26	7.92906e-07	128	129
ANFLEEPL	GCAAACTTTCTCGAGGAGCCACTG	Pool 13	226	227	2.45685e-05	2720	2721	0.000144777	8394	8395	0.000136863	28	29	4.69415e-07	NA	NA	NA	NA	NA	NA	NA	NA	NA	NA	NA	NA	NA	NA	NA	636	637	3.5018e-05	634	635	3.51968e-05	NA	NA	NA	NA	NA	NA	NA	NA	NA	416	417	1.2717e-05	48	49
ANFQFFSC	GCAAACTTCCAGTTCTTTAGCTGT	Pool 13	2811	2812	0.000304347	784	785	4.17676e-05	348	349	5.68971e-06	1556	1557	2.52027e-05	NA	NA	NA	NA	NA	NA	NA	NA	NA	NA	NA	NA	NA	NA	NA	3728	3729	0.000204995	2184	2185	0.00012111	NA	NA	NA	NA	NA	NA	NA	NA	NA	380	381	1.16191e-05	1406	1407
ANISYLTV	GCCAACATCAGTTACTTAACAGTC	Pool 13	574	575	6.22331e-05	474	475	2.52734e-05	48	49	7.98841e-07	32	33	5.34162e-07	NA	NA	NA	NA	NA	NA	NA	NA	NA	NA	NA	NA	NA	NA	NA	1776	1777	9.76876e-05	1972	1973	0.000109359	NA	NA	NA	NA	NA	NA	NA	NA	NA	192	193	5.8858e-06	493	494
ANKTFIYL	GCCAATAAAACTTTCATTTACTTG	Pool 13	289	290	3.13871e-05	124	125	6.6509e-06	86	87	1.41835e-06	120	121	1.95859e-06	NA	NA	NA	NA	NA	NA	NA	NA	NA	NA	NA	NA	NA	NA	NA	672	673	3.6997e-05	828	829	4.59498e-05	NA	NA	NA	NA	NA	NA	NA	NA	NA	248	249	7.5936e-06	206	207
ANLSFADI	GCGAACCTGAGCTTCGCGGATATC	Pool 13	173	174	1.88323e-05	18	19	1.01094e-06	14	15	2.44543e-07	206	207	3.35065e-06	NA	NA	NA	NA	NA	NA	NA	NA	NA	NA	NA	NA	NA	NA	NA	720	721	3.96358e-05	292	293	1.62404e-05	NA	NA	NA	NA	NA	NA	NA	NA	NA	6	7	2.13475e-07	324	325
ANLSFAVL	GCTAACTTATCTTTTGCTGTCTTA	Pool 13	5076	5077	0.000549491	6498	6499	0.000345794	2918	2919	4.75881e-05	5222	5223	8.45433e-05	NA	NA	NA	NA	NA	NA	NA	NA	NA	NA	NA	NA	NA	NA	NA	8698	8699	0.000478213	18466	18467	0.00102359	NA	NA	NA	NA	NA	NA	NA	NA	NA	5289	5290	0.000161326	3051	3052
ANLSFTDI	GCGAACCTCTCTTTCACAGACATT	Pool 13	1752	1753	0.00018973	1590	1591	8.46526e-05	294	295	4.80935e-06	278	279	4.5161e-06	NA	NA	NA	NA	NA	NA	NA	NA	NA	NA	NA	NA	NA	NA	NA	6258	6259	0.000344078	3098	3099	0.000171771	NA	NA	NA	NA	NA	NA	NA	NA	NA	3918	3919	0.000119515	1119	1120
ANLYFLDV	GCGAATCTCTACTTCTTGGACGTT	Pool 13	3949	3950	0.000427514	46744	46745	0.00248717	599898	599899	0.00978008	361868	361869	0.00585747	NA	NA	NA	NA	NA	NA	NA	NA	NA	NA	NA	NA	NA	NA	NA	9602	9603	0.000527909	6568	6569	0.000364106	NA	NA	NA	NA	NA	NA	NA	NA	NA	204339	204340	0.00623163	631820	631821
ANNFTTPL	GCAAATAATTTCACTACGCCGTTG	Pool 13	809	810	8.76675e-05	782	783	4.16612e-05	352	353	5.75492e-06	346	347	5.61679e-06	NA	NA	NA	NA	NA	NA	NA	NA	NA	NA	NA	NA	NA	NA	NA	1432	1433	7.87767e-05	1416	1417	7.85414e-05	NA	NA	NA	NA	NA	NA	NA	NA	NA	2	3	9.14892e-08	16	17
ANSPYATL	GCTAACAGCCCGTACGCCACATTG	Pool 13	271	272	2.9439e-05	522	523	2.78274e-05	36	37	6.03207e-07	22	23	3.72295e-07	NA	NA	NA	NA	NA	NA	NA	NA	NA	NA	NA	NA	NA	NA	NA	904	905	4.97508e-05	702	703	3.89659e-05	NA	NA	NA	NA	NA	NA	NA	NA	NA	111	112	3.4156e-06	104	105
ANYDFYQL	GCGAACTACGATTTCTATCAACTT	Pool 13	4432	4433	0.00047979	3374	3375	0.000179574	2106	2107	3.43502e-05	968	969	1.56849e-05	NA	NA	NA	NA	NA	NA	NA	NA	NA	NA	NA	NA	NA	NA	NA	6768	6769	0.000372114	13236	13237	0.0007337	NA	NA	NA	NA	NA	NA	NA	NA	NA	664	665	2.02801e-05	2973	2974
ANYILLAF	GCTAACTATATCCTGCTCGCTTTC	Pool 13	3989	3990	0.000431844	4692	4693	0.000249701	1026	1027	1.67431e-05	2528	2529	4.09362e-05	NA	NA	NA	NA	NA	NA	NA	NA	NA	NA	NA	NA	NA	NA	NA	10008	10009	0.000550228	9018	9019	0.000499905	NA	NA	NA	NA	NA	NA	NA	NA	NA	422	423	1.29e-05	1478	1479
ANYKTIGL	GCAAACTATAAAACGATTGGTCTG	Pool 13	194	195	2.11051e-05	528	529	2.81466e-05	596	597	9.73282e-06	50	51	8.25523e-07	NA	NA	NA	NA	NA	NA	NA	NA	NA	NA	NA	NA	NA	NA	NA	386	387	2.12747e-05	192	193	1.06976e-05	NA	NA	NA	NA	NA	NA	NA	NA	NA	510	511	1.55837e-05	181	182
ANYSDCFL	GCTAACTACTCCGATTGTTTCCTC	Pool 13	1707	1708	0.000184859	944	945	5.02808e-05	48	49	7.98841e-07	306	307	4.96933e-06	NA	NA	NA	NA	NA	NA	NA	NA	NA	NA	NA	NA	NA	NA	NA	2064	2065	0.00011352	1390	1391	7.71003e-05	NA	NA	NA	NA	NA	NA	NA	NA	NA	111	112	3.4156e-06	271	272
APFFATFL	GCACCGTTCTTTGCTACATTCCTT	Pool 13	854	855	9.25379e-05	228	229	1.21844e-05	1314	1315	2.14383e-05	3158	3159	5.11339e-05	NA	NA	NA	NA	NA	NA	NA	NA	NA	NA	NA	NA	NA	NA	NA	1468	1469	8.07558e-05	1974	1975	0.00010947	NA	NA	NA	NA	NA	NA	NA	NA	NA	250	251	7.65459e-06	1825	1826
APFVYTYL	GCTCCCTTCGTTTATACCTACTTA	Pool 13	883	884	9.56766e-05	146	147	7.82146e-06	168	169	2.75519e-06	120	121	1.95859e-06	NA	NA	NA	NA	NA	NA	NA	NA	NA	NA	NA	NA	NA	NA	NA	2156	2157	0.000118577	2560	2561	0.000141951	NA	NA	NA	NA	NA	NA	NA	NA	NA	21	22	6.70921e-07	154	155
APRLYYPL	GCTCCTCGTCTCTACTATCCCCTA	Pool 13	3654	3655	0.000395586	16498	16499	0.000877865	42882	42883	0.000699116	139378	139379	0.00225609	NA	NA	NA	NA	NA	NA	NA	NA	NA	NA	NA	NA	NA	NA	NA	4770	4771	0.000262278	6314	6315	0.000350028	NA	NA	NA	NA	NA	NA	NA	NA	NA	32371	32372	0.000987229	13808	13809
AQATYSGL	GCCCAGGCAACCTATTCGGGGCTT	Pool 13	140	141	1.52606e-05	14	15	7.98108e-07	636	637	1.03849e-05	110	111	1.79673e-06	NA	NA	NA	NA	NA	NA	NA	NA	NA	NA	NA	NA	NA	NA	NA	196	197	1.08297e-05	492	493	2.7326e-05	NA	NA	NA	NA	NA	NA	NA	NA	NA	11091	11092	0.000338266	24	25
AQFFQAGV	GCTCAATTCTTTCAAGCTGGGGTG	Pool 13	777	778	8.42041e-05	560	561	2.98492e-05	158	159	2.59216e-06	328	329	5.32543e-06	NA	NA	NA	NA	NA	NA	NA	NA	NA	NA	NA	NA	NA	NA	NA	2408	2409	0.000132431	1986	1987	0.000110135	NA	NA	NA	NA	NA	NA	NA	NA	NA	385	386	1.17716e-05	518	519
AQFYFLCL	GCTCAATTTTATTTCCTTTGTTTG	Pool 13	4618	4619	0.000499921	1262	1263	6.72007e-05	28010	28011	0.00045666	2634	2635	4.2652e-05	NA	NA	NA	NA	NA	NA	NA	NA	NA	NA	NA	NA	NA	NA	NA	12426	12427	0.000683153	7804	7805	0.000432615	NA	NA	NA	NA	NA	NA	NA	NA	NA	1786	1787	5.44971e-05	1062	1063
AQIFFVYI	GCGCAAATATTCTTCGTCTATATA	Pool 13	4360	4361	0.000471997	14702	14703	0.000782305	46742	46743	0.000762046	35888	35889	0.000580925	NA	NA	NA	NA	NA	NA	NA	NA	NA	NA	NA	NA	NA	NA	NA	10644	10645	0.000585191	7778	7779	0.000431174	NA	NA	NA	NA	NA	NA	NA	NA	NA	113444	113445	0.00345966	82351	82352
AQLHFLCL	GCGCAGTTACATTTCCTCTGCCTT	Pool 13	5169	5170	0.000559557	2326	2327	0.000123813	5162	5163	8.41718e-05	880	881	1.42605e-05	NA	NA	NA	NA	NA	NA	NA	NA	NA	NA	NA	NA	NA	NA	NA	15890	15891	0.000873581	10500	10501	0.000582049	NA	NA	NA	NA	NA	NA	NA	NA	NA	1848	1849	5.63878e-05	4830	4831
AQRAFVAL	GCCCAGCGCGCGTTCGTGGCATTA	Pool 13	1060	1061	0.000114834	228	229	1.21844e-05	30	31	5.05389e-07	44	45	7.28403e-07	NA	NA	NA	NA	NA	NA	NA	NA	NA	NA	NA	NA	NA	NA	NA	2898	2899	0.000159368	1744	1745	9.67218e-05	NA	NA	NA	NA	NA	NA	NA	NA	NA	52	53	1.61631e-06	74	75
AQRTYGPL	GCTCAACGGACCTATGGTCCATTG	Pool 13	23	24	2.59756e-06	NA	1	5.32072e-08	4	5	8.15144e-08	NA	1	1.61867e-08	NA	NA	NA	NA	NA	NA	NA	NA	NA	NA	NA	NA	NA	NA	NA	136	137	7.53134e-06	80	81	4.48966e-06	NA	NA	NA	NA	NA	NA	NA	NA	NA	NA	1	3.04964e-08	1	2
AQSNYVRL	GCCCAATCGAACTATGTTCGACTC	Pool 13	1752	1753	0.00018973	1352	1353	7.19893e-05	392	393	6.40703e-06	538	539	8.72465e-06	NA	NA	NA	NA	NA	NA	NA	NA	NA	NA	NA	NA	NA	NA	NA	3054	3055	0.000167943	2446	2447	0.000135632	NA	NA	NA	NA	NA	NA	NA	NA	NA	146	147	4.48297e-06	544	545
AQTSFFRL	GCGCAAACCAGTTTCTTTAGATTG	Pool 13	352	353	3.82057e-05	104	105	5.58676e-06	142	143	2.33131e-06	42	43	6.96029e-07	NA	NA	NA	NA	NA	NA	NA	NA	NA	NA	NA	NA	NA	NA	NA	902	903	4.96409e-05	916	917	5.08274e-05	NA	NA	NA	NA	NA	NA	NA	NA	NA	58	59	1.79929e-06	7	8
AQVPFIAL	GCCCAGGTTCCCTTTATAGCATTA	Pool 13	553	554	5.99602e-05	204	205	1.09075e-05	1026	1027	1.67431e-05	36	37	5.98909e-07	NA	NA	NA	NA	NA	NA	NA	NA	NA	NA	NA	NA	NA	NA	NA	1490	1491	8.19652e-05	1690	1691	9.37287e-05	NA	NA	NA	NA	NA	NA	NA	NA	NA	174	175	5.33687e-06	230	231
AQYRFNLS	GCGCAGTACCGATTCAATTTGTCC	Pool 13	263	264	2.85731e-05	676	677	3.60213e-05	224	225	3.66815e-06	104	105	1.69961e-06	NA	NA	NA	NA	NA	NA	NA	NA	NA	NA	NA	NA	NA	NA	NA	358	359	1.97354e-05	368	369	2.04529e-05	NA	NA	NA	NA	NA	NA	NA	NA	NA	1	2	6.09928e-08	6	7
ARRFFAPL	GCGCGCCGTTTCTTCGCTCCGTTA	Pool 13	1655	1656	0.000179231	1242	1243	6.61365e-05	5698	5699	9.29101e-05	492	493	7.98006e-06	NA	NA	NA	NA	NA	NA	NA	NA	NA	NA	NA	NA	NA	NA	NA	4228	4229	0.000232482	2800	2801	0.000155254	NA	NA	NA	NA	NA	NA	NA	NA	NA	297	298	9.08792e-06	1362	1363
ASAAYLSL	GCCTCTGCGGCATACTTGTCCTTA	Pool 13	401	402	4.35091e-05	292	293	1.55897e-05	134	135	2.20089e-06	120	121	1.95859e-06	NA	NA	NA	NA	NA	NA	NA	NA	NA	NA	NA	NA	NA	NA	NA	2156	2157	0.000118577	928	929	5.14926e-05	NA	NA	NA	NA	NA	NA	NA	NA	NA	6	7	2.13475e-07	45	46
ASAEFCNI	GCTTCCGCTGAATTCTGCAATATA	Pool 13	2352	2353	0.000254669	1980	1981	0.000105403	4112	4113	6.70538e-05	23788	23789	0.000385066	NA	NA	NA	NA	NA	NA	NA	NA	NA	NA	NA	NA	NA	NA	NA	4764	4765	0.000261948	6152	6153	0.000341048	NA	NA	NA	NA	NA	NA	NA	NA	NA	1297	1298	3.95843e-05	15161	15162
ASASFQEL	GCCAGCGCCAGCTTTCAGGAGTTG	Pool 13	2312	2313	0.000250339	824	825	4.38959e-05	140	141	2.29871e-06	1018	1019	1.64943e-05	NA	NA	NA	NA	NA	NA	NA	NA	NA	NA	NA	NA	NA	NA	NA	6572	6573	0.00036134	3970	3971	0.000220104	NA	NA	NA	NA	NA	NA	NA	NA	NA	217	218	6.64821e-06	648	649
ASASHSRL	GCCTCCGCCAGTCATTCCAGACTA	Pool 13	3969	3970	0.000429679	1434	1435	7.63523e-05	254	255	4.15723e-06	66	67	1.08451e-06	NA	NA	NA	NA	NA	NA	NA	NA	NA	NA	NA	NA	NA	NA	NA	4646	4647	0.000255461	3356	3357	0.000186072	NA	NA	NA	NA	NA	NA	NA	NA	NA	240	241	7.34963e-06	148	149
ASAVFRLL	GCATCGGCCGTGTTTCGGCTACTA	Pool 13	88	89	9.6326e-06	16	17	9.04522e-07	2	3	4.89086e-08	NA	1	1.61867e-08	NA	NA	NA	NA	NA	NA	NA	NA	NA	NA	NA	NA	NA	NA	NA	182	183	1.00601e-05	192	193	1.06976e-05	NA	NA	NA	NA	NA	NA	NA	NA	NA	73	74	2.25673e-06	9	10
ASCLYYLL	GCAAGTTGCCTTTATTATCTTCTC	Pool 13	3318	3319	0.00035922	7588	7589	0.000403789	712	713	1.1624e-05	4942	4943	8.0011e-05	NA	NA	NA	NA	NA	NA	NA	NA	NA	NA	NA	NA	NA	NA	NA	6698	6699	0.000368266	7090	7091	0.00039304	NA	NA	NA	NA	NA	NA	NA	NA	NA	690	691	2.1073e-05	1993	1994
ASFDKAKL	GCGTCCTTTGATAAGGCCAAACTT	Pool 13	783	784	8.48535e-05	230	231	1.22909e-05	740	741	1.20804e-05	46	47	7.60776e-07	NA	NA	NA	NA	NA	NA	NA	NA	NA	NA	NA	NA	NA	NA	NA	1572	1573	8.6473e-05	4694	4695	0.000260234	NA	NA	NA	NA	NA	NA	NA	NA	NA	92	93	2.83616e-06	285	286
ASFEQAAF	GCGTCTTTTGAACAGGCCGCTTTT	Pool 13	14560	14561	0.00157596	309618	309619	0.016474	1442394	1442395	0.0235152	634076	634077	0.0102636	NA	NA	NA	NA	NA	NA	NA	NA	NA	NA	NA	NA	NA	NA	NA	34342	34343	0.00188795	43112	43113	0.00238967	NA	NA	NA	NA	NA	NA	NA	NA	NA	618475	618476	0.0188613	432447	432448
ASFHRFNL	GCCAGTTTCCATCGATTTAACCTC	Pool 13	2286	2287	0.000247525	13542	13543	0.000720585	15342	15343	0.000250135	69278	69279	0.0011214	NA	NA	NA	NA	NA	NA	NA	NA	NA	NA	NA	NA	NA	NA	NA	6858	6859	0.000377062	5046	5047	0.000279745	NA	NA	NA	NA	NA	NA	NA	NA	NA	16166	16167	0.000493035	13793	13794
ASFLPLLL	GCCTCATTCCTGCCTCTCCTTCTA	Pool 13	79	80	8.65852e-06	62	63	3.35205e-06	NA	1	1.63029e-08	50	51	8.25523e-07	NA	NA	NA	NA	NA	NA	NA	NA	NA	NA	NA	NA	NA	NA	NA	178	179	9.84022e-06	124	125	6.92849e-06	NA	NA	NA	NA	NA	NA	NA	NA	NA	3	4	1.21986e-07	22	23
ASFNSGEL	GCAAGCTTCAATTCTGGGGAACTT	Pool 13	213	214	2.31615e-05	182	183	9.73692e-06	26	27	4.40178e-07	66	67	1.08451e-06	NA	NA	NA	NA	NA	NA	NA	NA	NA	NA	NA	NA	NA	NA	NA	510	511	2.80914e-05	654	655	3.63053e-05	NA	NA	NA	NA	NA	NA	NA	NA	NA	153	154	4.69644e-06	3	4
ASFPFPGS	GCCAGCTTTCCATTTCCCGGATCT	Pool 13	829	830	8.98321e-05	644	645	3.43186e-05	168	169	2.75519e-06	266	267	4.32186e-06	NA	NA	NA	NA	NA	NA	NA	NA	NA	NA	NA	NA	NA	NA	NA	2446	2447	0.00013452	2022	2023	0.000112131	NA	NA	NA	NA	NA	NA	NA	NA	NA	399	400	1.21986e-05	798	799
ASFPKLEL	GCTAGCTTCCCTAAACTCGAATTG	Pool 13	943	944	0.000102171	570	571	3.03813e-05	74	75	1.22272e-06	194	195	3.15641e-06	NA	NA	NA	NA	NA	NA	NA	NA	NA	NA	NA	NA	NA	NA	NA	2652	2653	0.000145844	1440	1441	7.98717e-05	NA	NA	NA	NA	NA	NA	NA	NA	NA	501	502	1.53092e-05	69	70
ASFSNNNL	GCCTCATTTAGTAACAATAATCTA	Pool 13	452	453	4.90289e-05	28	29	1.54301e-06	10	11	1.79332e-07	NA	1	1.61867e-08	NA	NA	NA	NA	NA	NA	NA	NA	NA	NA	NA	NA	NA	NA	NA	1076	1077	5.92062e-05	1754	1755	9.72761e-05	NA	NA	NA	NA	NA	NA	NA	NA	NA	250	251	7.65459e-06	26	27
ASFTHSFV	GCTAGTTTTACCCACAGCTTTGTA	Pool 13	2645	2646	0.00028638	7702	7703	0.000409855	1910	1911	3.11548e-05	18104	18105	0.000293061	NA	NA	NA	NA	NA	NA	NA	NA	NA	NA	NA	NA	NA	NA	NA	5458	5459	0.000300099	6110	6111	0.00033872	NA	NA	NA	NA	NA	NA	NA	NA	NA	60732	60733	0.00185214	2224	2225
ASFTVSVF	GCGTCGTTTACGGTATCAGTTTTC	Pool 13	988	989	0.000107041	1996	1997	0.000106255	318	319	5.20062e-06	154	155	2.50894e-06	NA	NA	NA	NA	NA	NA	NA	NA	NA	NA	NA	NA	NA	NA	NA	3232	3233	0.000177729	2234	2235	0.000123881	NA	NA	NA	NA	NA	NA	NA	NA	NA	326	327	9.97232e-06	443	444
ASFYISLV	GCATCCTTCTACATATCTTTGGTC	Pool 13	590	591	6.39648e-05	98	99	5.26751e-06	18	19	3.09755e-07	32	33	5.34162e-07	NA	NA	NA	NA	NA	NA	NA	NA	NA	NA	NA	NA	NA	NA	NA	1176	1177	6.47036e-05	528	529	2.93214e-05	NA	NA	NA	NA	NA	NA	NA	NA	NA	118	119	3.62907e-06	43	44
ASGAFLPL	GCCAGCGGAGCCTTCCTGCCTTTA	Pool 13	2	3	3.24694e-07	NA	1	5.32072e-08	NA	1	1.63029e-08	2	3	4.85602e-08	NA	NA	NA	NA	NA	NA	NA	NA	NA	NA	NA	NA	NA	NA	NA	4	5	2.74867e-07	4	5	2.7714e-07	NA	NA	NA	NA	NA	NA	NA	NA	NA	NA	1	3.04964e-08	2	3
ASGFFSVF	GCATCAGGCTTCTTCTCTGTGTTC	Pool 13	3618	3619	0.00039169	1928	1929	0.000102637	818	819	1.33521e-05	2052	2053	3.32314e-05	NA	NA	NA	NA	NA	NA	NA	NA	NA	NA	NA	NA	NA	NA	NA	8600	8601	0.000472825	6386	6387	0.000354018	NA	NA	NA	NA	NA	NA	NA	NA	NA	2559	2560	7.80708e-05	513	514
ASHGFYEF	GCGTCACATGGATTCTACGAATTT	Pool 13	8499	8500	0.000919967	4868	4869	0.000259066	5048	5049	8.23132e-05	4978	4979	8.05937e-05	NA	NA	NA	NA	NA	NA	NA	NA	NA	NA	NA	NA	NA	NA	NA	24056	24057	0.00132249	8922	8923	0.000494584	NA	NA	NA	NA	NA	NA	NA	NA	NA	3456	3457	0.000105426	4829	4830
ASHQFSPA	GCATCACACCAATTTTCTCCTGCT	Pool 13	1960	1961	0.000212242	682	683	3.63405e-05	784	785	1.27978e-05	1514	1515	2.45229e-05	NA	NA	NA	NA	NA	NA	NA	NA	NA	NA	NA	NA	NA	NA	NA	6056	6057	0.000332973	3458	3459	0.000191725	NA	NA	NA	NA	NA	NA	NA	NA	NA	587	588	1.79319e-05	243	244
ASIFDSRL	GCGAGCATCTTCGATAGCCGATTG	Pool 13	581	582	6.29907e-05	146	147	7.82146e-06	128	129	2.10307e-06	6	7	1.13307e-07	NA	NA	NA	NA	NA	NA	NA	NA	NA	NA	NA	NA	NA	NA	NA	1244	1245	6.84418e-05	1238	1239	6.86752e-05	NA	NA	NA	NA	NA	NA	NA	NA	NA	539	540	1.64681e-05	25	26
ASILWYNM	GCGAGCATCTTATGGTATAATATG	Pool 13	1849	1850	0.000200228	1420	1421	7.56074e-05	338	339	5.52668e-06	1356	1357	2.19654e-05	NA	NA	NA	NA	NA	NA	NA	NA	NA	NA	NA	NA	NA	NA	NA	4374	4375	0.000240508	4030	4031	0.00022343	NA	NA	NA	NA	NA	NA	NA	NA	NA	1025	1026	3.12893e-05	4373	4374
ASITFFSP	GCATCTATCACTTTCTTCTCTCCT	Pool 13	37306	37307	0.00403779	13112	13113	0.000697706	5328	5329	8.68781e-05	46718	46719	0.000756228	NA	NA	NA	NA	NA	NA	NA	NA	NA	NA	NA	NA	NA	NA	NA	49632	49633	0.00272849	34452	34453	0.00190966	NA	NA	NA	NA	NA	NA	NA	NA	NA	12281	12282	0.000374557	15017	15018
ASKHFMLF	GCCTCCAAACACTTCATGCTCTTT	Pool 13	1043	1044	0.000112994	352	353	1.87821e-05	262	263	4.28766e-06	1444	1445	2.33898e-05	NA	NA	NA	NA	NA	NA	NA	NA	NA	NA	NA	NA	NA	NA	NA	1886	1887	0.000103735	1358	1359	7.53266e-05	NA	NA	NA	NA	NA	NA	NA	NA	NA	102	103	3.14113e-06	206	207
ASLCIAIL	GCCAGTTTGTGCATTGCCATTCTA	Pool 13	280	281	3.0413e-05	50	51	2.71357e-06	10	11	1.79332e-07	98	99	1.60249e-06	NA	NA	NA	NA	NA	NA	NA	NA	NA	NA	NA	NA	NA	NA	NA	1120	1121	6.16251e-05	650	651	3.60836e-05	NA	NA	NA	NA	NA	NA	NA	NA	NA	9	10	3.04964e-07	24	25
ASLELGKL	GCCTCACTAGAGCTCGGTAAATTG	Pool 13	510	511	5.53063e-05	262	263	1.39935e-05	62	63	1.02708e-06	170	171	2.76793e-06	NA	NA	NA	NA	NA	NA	NA	NA	NA	NA	NA	NA	NA	NA	NA	1312	1313	7.21799e-05	1258	1259	6.97838e-05	NA	NA	NA	NA	NA	NA	NA	NA	NA	706	707	2.15609e-05	254	255
ASLFLTGI	GCCTCTCTGTTCCTGACGGGCATT	Pool 13	31	32	3.46341e-06	40	41	2.18149e-06	6	7	1.1412e-07	42	43	6.96029e-07	NA	NA	NA	NA	NA	NA	NA	NA	NA	NA	NA	NA	NA	NA	NA	144	145	7.97113e-06	206	207	1.14736e-05	NA	NA	NA	NA	NA	NA	NA	NA	NA	4	5	1.52482e-07	5	6
ASLLMERL	GCGAGCCTTCTGATGGAGAGACTT	Pool 13	3562	3563	0.000385629	1110	1111	5.91132e-05	1018	1019	1.66126e-05	2424	2425	3.92528e-05	NA	NA	NA	NA	NA	NA	NA	NA	NA	NA	NA	NA	NA	NA	NA	12300	12301	0.000676227	7776	7777	0.000431063	NA	NA	NA	NA	NA	NA	NA	NA	NA	1380	1381	4.21155e-05	2443	2444
ASLPLPSL	GCTAGCTTACCCCTGCCGTCTCTG	Pool 13	220	221	2.39192e-05	294	295	1.56961e-05	NA	1	1.63029e-08	220	221	3.57727e-06	NA	NA	NA	NA	NA	NA	NA	NA	NA	NA	NA	NA	NA	NA	NA	1110	1111	6.10753e-05	262	263	1.45776e-05	NA	NA	NA	NA	NA	NA	NA	NA	NA	33	34	1.03688e-06	88	89
ASLRYSGV	GCAAGTCTTAGATATTCAGGTGTG	Pool 13	237	238	2.57591e-05	200	201	1.06946e-05	182	183	2.98343e-06	1868	1869	3.0253e-05	NA	NA	NA	NA	NA	NA	NA	NA	NA	NA	NA	NA	NA	NA	NA	702	703	3.86462e-05	158	159	8.81304e-06	NA	NA	NA	NA	NA	NA	NA	NA	NA	51	52	1.58581e-06	99	100
ASLSFVDI	GCCAGTTTGTCTTTTGTTGATATC	Pool 13	806	807	8.73428e-05	176	177	9.41767e-06	330	331	5.39625e-06	3872	3873	6.26912e-05	NA	NA	NA	NA	NA	NA	NA	NA	NA	NA	NA	NA	NA	NA	NA	2090	2091	0.000114949	1270	1271	7.04489e-05	NA	NA	NA	NA	NA	NA	NA	NA	NA	498	499	1.52177e-05	203	204
ASLSLVTL	GCGTCTCTTTCCTTGGTCACCCTG	Pool 13	NA	1	1.08231e-07	NA	1	5.32072e-08	2	3	4.89086e-08	NA	1	1.61867e-08	NA	NA	NA	NA	NA	NA	NA	NA	NA	NA	NA	NA	NA	NA	NA	NA	1	5.49733e-08	NA	1	5.5428e-08	NA	NA	NA	NA	NA	NA	NA	NA	NA	NA	1	3.04964e-08	NA	1
ASLTLTLL	GCCTCGTTGACACTTACGCTTCTT	Pool 13	841	842	9.11309e-05	574	575	3.05941e-05	190	191	3.11385e-06	886	887	1.43576e-05	NA	NA	NA	NA	NA	NA	NA	NA	NA	NA	NA	NA	NA	NA	NA	2318	2319	0.000127483	2624	2625	0.000145498	NA	NA	NA	NA	NA	NA	NA	NA	NA	339	340	1.03688e-05	1765	1766
ASLTMSGM	GCTAGTTTAACAATGTCAGGCATG	Pool 13	5085	5086	0.000550465	4080	4081	0.000217139	1248	1249	2.03623e-05	12934	12935	0.000209375	NA	NA	NA	NA	NA	NA	NA	NA	NA	NA	NA	NA	NA	NA	NA	7780	7781	0.000427747	8044	8045	0.000445918	NA	NA	NA	NA	NA	NA	NA	NA	NA	1608	1609	4.90687e-05	5110	5111
ASMSTYCL	GCTTCAATGTCAACATATTGCCTG	Pool 13	1550	1551	0.000167867	1408	1409	7.49689e-05	8758	8759	0.000142797	268	269	4.35423e-06	NA	NA	NA	NA	NA	NA	NA	NA	NA	NA	NA	NA	NA	NA	NA	3280	3281	0.000180367	2172	2173	0.000120445	NA	NA	NA	NA	NA	NA	NA	NA	NA	1271	1272	3.87914e-05	1594	1595
ASNHHYAL	GCATCGAATCACCACTACGCGCTT	Pool 13	25	26	2.81402e-06	210	211	1.12267e-05	NA	1	1.63029e-08	NA	1	1.61867e-08	NA	NA	NA	NA	NA	NA	NA	NA	NA	NA	NA	NA	NA	NA	NA	158	159	8.74076e-06	94	95	5.26566e-06	NA	NA	NA	NA	NA	NA	NA	NA	NA	NA	1	3.04964e-08	2	3
ASNVYGNM	GCGTCAAATGTCTATGGAAACATG	Pool 13	255	256	2.77073e-05	368	369	1.96335e-05	286	287	4.67893e-06	376	377	6.1024e-06	NA	NA	NA	NA	NA	NA	NA	NA	NA	NA	NA	NA	NA	NA	NA	1708	1709	9.39494e-05	422	423	2.3446e-05	NA	NA	NA	NA	NA	NA	NA	NA	NA	186	187	5.70283e-06	135	136
ASNYFRAM	GCATCCAATTACTTCCGCGCGATG	Pool 13	164	165	1.78582e-05	NA	1	5.32072e-08	NA	1	1.63029e-08	NA	1	1.61867e-08	NA	NA	NA	NA	NA	NA	NA	NA	NA	NA	NA	NA	NA	NA	NA	590	591	3.24892e-05	490	491	2.72151e-05	NA	NA	NA	NA	NA	NA	NA	NA	NA	6	7	2.13475e-07	2	3
ASPSHWPL	GCTTCTCCTAGTCACTGGCCACTA	Pool 13	7330	7331	0.000793445	544	545	2.89979e-05	42	43	7.01024e-07	834	835	1.35159e-05	NA	NA	NA	NA	NA	NA	NA	NA	NA	NA	NA	NA	NA	NA	NA	2892	2893	0.000159038	12960	12961	0.000718402	NA	NA	NA	NA	NA	NA	NA	NA	NA	467	468	1.42723e-05	431	432
ASPTFRRL	GCATCTCCGACATTCCGGCGTCTC	Pool 13	2958	2959	0.000320257	2618	2619	0.00013935	592	593	9.66761e-06	5746	5747	9.30251e-05	NA	NA	NA	NA	NA	NA	NA	NA	NA	NA	NA	NA	NA	NA	NA	6324	6325	0.000347706	6560	6561	0.000363663	NA	NA	NA	NA	NA	NA	NA	NA	NA	3524	3525	0.0001075	2362	2363
ASQYSPML	GCGTCTCAGTACAGTCCGATGCTT	Pool 13	1188	1189	0.000128687	570	571	3.03813e-05	394	395	6.43964e-06	1206	1207	1.95374e-05	NA	NA	NA	NA	NA	NA	NA	NA	NA	NA	NA	NA	NA	NA	NA	2890	2891	0.000158928	2990	2991	0.000165785	NA	NA	NA	NA	NA	NA	NA	NA	NA	153	154	4.69644e-06	413	414
ASRQFHAI	GCAAGCAGGCAGTTCCATGCGATA	Pool 13	6203	6204	0.000671468	1112	1113	5.92196e-05	672	673	1.09718e-05	1196	1197	1.93755e-05	NA	NA	NA	NA	NA	NA	NA	NA	NA	NA	NA	NA	NA	NA	NA	6586	6587	0.000362109	4520	4521	0.00025059	NA	NA	NA	NA	NA	NA	NA	NA	NA	2233	2234	6.81289e-05	1514	1515
ASRVYYIM	GCCAGTCGGGTATATTACATCATG	Pool 13	258	259	2.8032e-05	480	481	2.55927e-05	106	107	1.74441e-06	10438	10439	0.000168973	NA	NA	NA	NA	NA	NA	NA	NA	NA	NA	NA	NA	NA	NA	NA	848	849	4.66723e-05	1136	1137	6.30216e-05	NA	NA	NA	NA	NA	NA	NA	NA	NA	191	192	5.85531e-06	214	215
ASSAYHQL	GCCAGTTCTGCATACCATCAGCTC	Pool 13	2694	2695	0.000291684	1426	1427	7.59267e-05	414	415	6.7657e-06	3850	3851	6.23351e-05	NA	NA	NA	NA	NA	NA	NA	NA	NA	NA	NA	NA	NA	NA	NA	5264	5265	0.000289434	5800	5801	0.000321538	NA	NA	NA	NA	NA	NA	NA	NA	NA	155	156	4.75744e-06	540	541
ASSFFAFL	GCCTCCAGTTTCTTTGCGTTCCTC	Pool 13	2942	2943	0.000318525	9208	9209	0.000489985	830	831	1.35477e-05	6316	6317	0.000102252	NA	NA	NA	NA	NA	NA	NA	NA	NA	NA	NA	NA	NA	NA	NA	9556	9557	0.00052538	6980	6981	0.000386943	NA	NA	NA	NA	NA	NA	NA	NA	NA	3984	3985	0.000121528	1353	1354
ASSGYGSL	GCTTCATCCGGATACGGTTCGTTA	Pool 13	7627	7628	0.00082559	2328	2329	0.00012392	1128	1129	1.8406e-05	11028	11029	0.000178523	NA	NA	NA	NA	NA	NA	NA	NA	NA	NA	NA	NA	NA	NA	NA	22930	22931	0.00126059	10130	10131	0.000561541	NA	NA	NA	NA	NA	NA	NA	NA	NA	1759	1760	5.36736e-05	4843	4844
ASSLFLMI	GCCTCGAGCTTATTCCTGATGATC	Pool 13	2070	2071	0.000224147	12162	12163	0.000647159	968	969	1.57975e-05	2982	2983	4.8285e-05	NA	NA	NA	NA	NA	NA	NA	NA	NA	NA	NA	NA	NA	NA	NA	8026	8027	0.000441271	4768	4769	0.000264336	NA	NA	NA	NA	NA	NA	NA	NA	NA	2173	2174	6.62992e-05	2241	2242
ASSPFSTL	GCAAGTTCCCCGTTTTCCACGTTA	Pool 13	14860	14861	0.00160843	22640	22641	0.00120466	5160	5161	8.41392e-05	32782	32783	0.000530649	NA	NA	NA	NA	NA	NA	NA	NA	NA	NA	NA	NA	NA	NA	NA	13840	13841	0.000760885	11848	11849	0.000656766	NA	NA	NA	NA	NA	NA	NA	NA	NA	32259	32260	0.000983814	16692	16693
ASSWLLHL	GCCTCTTCGTGGCTGCTGCATCTT	Pool 13	238	239	2.58673e-05	282	283	1.50576e-05	NA	1	1.63029e-08	64	65	1.05214e-06	NA	NA	NA	NA	NA	NA	NA	NA	NA	NA	NA	NA	NA	NA	NA	564	565	3.10599e-05	1078	1079	5.98068e-05	NA	NA	NA	NA	NA	NA	NA	NA	NA	158	159	4.84893e-06	17	18
ASTLLASL	GCCTCCACATTGTTGGCATCTCTC	Pool 13	555	556	6.01767e-05	324	325	1.72923e-05	18	19	3.09755e-07	44	45	7.28403e-07	NA	NA	NA	NA	NA	NA	NA	NA	NA	NA	NA	NA	NA	NA	NA	1150	1151	6.32743e-05	778	779	4.31784e-05	NA	NA	NA	NA	NA	NA	NA	NA	NA	12	13	3.96453e-07	28	29
ASVVFEGV	GCTTCAGTTGTATTTGAGGGCGTC	Pool 13	87	88	9.52437e-06	98	99	5.26751e-06	20	21	3.42361e-07	NA	1	1.61867e-08	NA	NA	NA	NA	NA	NA	NA	NA	NA	NA	NA	NA	NA	NA	NA	184	185	1.01701e-05	302	303	1.67947e-05	NA	NA	NA	NA	NA	NA	NA	NA	NA	107	108	3.29361e-06	34	35
ASWACGSL	GCAAGCTGGGCCTGCGGCAGCTTG	Pool 13	NA	1	1.08231e-07	NA	1	5.32072e-08	NA	1	1.63029e-08	NA	1	1.61867e-08	NA	NA	NA	NA	NA	NA	NA	NA	NA	NA	NA	NA	NA	NA	NA	NA	1	5.49733e-08	NA	1	5.5428e-08	NA	NA	NA	NA	NA	NA	NA	NA	NA	NA	1	3.04964e-08	NA	1
ASWFSGAL	GCCTCCTGGTTCTCAGGTGCATTA	Pool 13	1550	1551	0.000167867	464	465	2.47413e-05	640	641	1.04501e-05	72	73	1.18163e-06	NA	NA	NA	NA	NA	NA	NA	NA	NA	NA	NA	NA	NA	NA	NA	2638	2639	0.000145075	2200	2201	0.000121997	NA	NA	NA	NA	NA	NA	NA	NA	NA	3473	3474	0.000105944	354	355
ASWHKLGL	GCATCTTGGCACAAGCTTGGGTTG	Pool 13	587	588	6.36401e-05	520	521	2.77209e-05	12	13	2.11937e-07	170	171	2.76793e-06	NA	NA	NA	NA	NA	NA	NA	NA	NA	NA	NA	NA	NA	NA	NA	3152	3153	0.000173331	1094	1095	6.06936e-05	NA	NA	NA	NA	NA	NA	NA	NA	NA	429	430	1.31134e-05	82	83
ASWLFKNA	GCCTCCTGGCTCTTTAAGAATGCA	Pool 13	420	421	4.55654e-05	400	401	2.13361e-05	120	121	1.97265e-06	1708	1709	2.76631e-05	NA	NA	NA	NA	NA	NA	NA	NA	NA	NA	NA	NA	NA	NA	NA	1238	1239	6.81119e-05	1060	1061	5.88091e-05	NA	NA	NA	NA	NA	NA	NA	NA	NA	83	84	2.5617e-06	137	138
ASWTCASV	GCGTCCTGGACCTGTGCCTCAGTC	Pool 13	NA	1	1.08231e-07	NA	1	5.32072e-08	NA	1	1.63029e-08	NA	1	1.61867e-08	NA	NA	NA	NA	NA	NA	NA	NA	NA	NA	NA	NA	NA	NA	NA	NA	1	5.49733e-08	NA	1	5.5428e-08	NA	NA	NA	NA	NA	NA	NA	NA	NA	NA	1	3.04964e-08	NA	1
ASWTLEEL	GCCAGTTGGACTCTAGAAGAATTA	Pool 13	39	40	4.32926e-06	242	243	1.29293e-05	NA	1	1.63029e-08	NA	1	1.61867e-08	NA	NA	NA	NA	NA	NA	NA	NA	NA	NA	NA	NA	NA	NA	NA	92	93	5.11252e-06	60	61	3.38111e-06	NA	NA	NA	NA	NA	NA	NA	NA	NA	24	25	7.6241e-07	12	13
ASWVLRSL	GCAAGCTGGGTCCTACGCTCCTTG	Pool 13	409	410	4.43749e-05	56	57	3.03281e-06	178	179	2.91822e-06	6	7	1.13307e-07	NA	NA	NA	NA	NA	NA	NA	NA	NA	NA	NA	NA	NA	NA	NA	386	387	2.12747e-05	660	661	3.66379e-05	NA	NA	NA	NA	NA	NA	NA	NA	NA	97	98	2.98865e-06	66	67
ASYFIRNM	GCTAGTTATTTTATTCGAAATATG	Pool 13	3376	3377	0.000365498	2382	2383	0.000126793	710	711	1.15913e-05	13466	13467	0.000217987	NA	NA	NA	NA	NA	NA	NA	NA	NA	NA	NA	NA	NA	NA	NA	3258	3259	0.000179158	3608	3609	0.000200039	NA	NA	NA	NA	NA	NA	NA	NA	NA	313	314	9.57587e-06	1341	1342
ASYGHVDV	GCGTCGTATGGTCATGTCGATGTT	Pool 13	3301	3302	0.00035738	20154	20155	0.00107239	41812	41813	0.000681672	69806	69807	0.00112995	NA	NA	NA	NA	NA	NA	NA	NA	NA	NA	NA	NA	NA	NA	NA	10150	10151	0.000558034	6784	6785	0.000376079	NA	NA	NA	NA	NA	NA	NA	NA	NA	41874	41875	0.00127704	97381	97382
ASYGQSGL	GCGTCCTACGGACAGAGTGGCCTC	Pool 13	NA	1	1.08231e-07	NA	1	5.32072e-08	NA	1	1.63029e-08	NA	1	1.61867e-08	NA	NA	NA	NA	NA	NA	NA	NA	NA	NA	NA	NA	NA	NA	NA	NA	1	5.49733e-08	NA	1	5.5428e-08	NA	NA	NA	NA	NA	NA	NA	NA	NA	NA	1	3.04964e-08	1	2
ASYIRIAM	GCAAGTTATATTAGAATTGCAATG	Pool 13	546	547	5.92026e-05	498	499	2.65504e-05	222	223	3.63554e-06	380	381	6.16714e-06	NA	NA	NA	NA	NA	NA	NA	NA	NA	NA	NA	NA	NA	NA	NA	1492	1493	8.20751e-05	1734	1735	9.61675e-05	NA	NA	NA	NA	NA	NA	NA	NA	NA	567	568	1.7322e-05	534	535
ASYIRIVM	GCCAGCTACATCCGTATTGTAATG	Pool 13	89	90	9.74083e-06	26	27	1.43659e-06	8	9	1.46726e-07	12	13	2.10427e-07	NA	NA	NA	NA	NA	NA	NA	NA	NA	NA	NA	NA	NA	NA	NA	144	145	7.97113e-06	148	149	8.25877e-06	NA	NA	NA	NA	NA	NA	NA	NA	NA	NA	1	3.04964e-08	10	11
ASYKDVLL	GCTAGCTATAAAGATGTTCTTTTA	Pool 13	3664	3665	0.000396668	512	513	2.72953e-05	312	313	5.1028e-06	2500	2501	4.0483e-05	NA	NA	NA	NA	NA	NA	NA	NA	NA	NA	NA	NA	NA	NA	NA	3130	3131	0.000172121	2642	2643	0.000146496	NA	NA	NA	NA	NA	NA	NA	NA	NA	805	806	2.45801e-05	470	471
ASYLLKPI	GCTAGTTACTTGCTAAAACCGATC	Pool 13	668	669	7.24069e-05	76	77	4.09695e-06	28	29	4.72784e-07	170	171	2.76793e-06	NA	NA	NA	NA	NA	NA	NA	NA	NA	NA	NA	NA	NA	NA	NA	1558	1559	8.57034e-05	988	989	5.48182e-05	NA	NA	NA	NA	NA	NA	NA	NA	NA	4	5	1.52482e-07	502	503
ASYLQNLL	GCATCCTACCTTCAAAACCTGTTA	Pool 13	2461	2462	0.000266466	1116	1117	5.94324e-05	1060	1061	1.72974e-05	918	919	1.48756e-05	NA	NA	NA	NA	NA	NA	NA	NA	NA	NA	NA	NA	NA	NA	NA	9412	9413	0.000517464	5970	5971	0.00033096	NA	NA	NA	NA	NA	NA	NA	NA	NA	2515	2516	7.67289e-05	600	601
ASYLSWRL	GCAAGTTATTTATCATGGCGGCTA	Pool 13	1841	1842	0.000199362	482	483	2.56991e-05	744	745	1.21456e-05	638	639	1.03433e-05	NA	NA	NA	NA	NA	NA	NA	NA	NA	NA	NA	NA	NA	NA	NA	3794	3795	0.000208624	2306	2307	0.000127872	NA	NA	NA	NA	NA	NA	NA	NA	NA	199	200	6.09928e-06	246	247
ATAIFLIL	GCCACGGCGATCTTCTTAATCCTA	Pool 13	6044	6045	0.000654259	3956	3957	0.000210541	1978	1979	3.22634e-05	1910	1911	3.09328e-05	NA	NA	NA	NA	NA	NA	NA	NA	NA	NA	NA	NA	NA	NA	NA	11160	11161	0.000613557	7120	7121	0.000394702	NA	NA	NA	NA	NA	NA	NA	NA	NA	1499	1500	4.57446e-05	1396	1397
ATFELIEL	GCAACATTTGAGCTAATCGAACTA	Pool 13	17	18	1.94817e-06	NA	1	5.32072e-08	NA	1	1.63029e-08	4	5	8.09336e-08	NA	NA	NA	NA	NA	NA	NA	NA	NA	NA	NA	NA	NA	NA	NA	66	67	3.68321e-06	206	207	1.14736e-05	NA	NA	NA	NA	NA	NA	NA	NA	NA	65	66	2.01276e-06	3	4
ATFFLTCI	GCGACGTTCTTCTTGACATGTATT	Pool 13	2068	2069	0.000223931	1518	1519	8.08217e-05	764	765	1.24717e-05	5574	5575	9.0241e-05	NA	NA	NA	NA	NA	NA	NA	NA	NA	NA	NA	NA	NA	NA	NA	5892	5893	0.000323958	4352	4353	0.000241278	NA	NA	NA	NA	NA	NA	NA	NA	NA	253	254	7.74608e-06	596	597
ATFIREVL	GCAACGTTTATCCGTGAGGTCCTT	Pool 13	930	931	0.000100763	676	677	3.60213e-05	1018	1019	1.66126e-05	392	393	6.36138e-06	NA	NA	NA	NA	NA	NA	NA	NA	NA	NA	NA	NA	NA	NA	NA	1670	1671	9.18604e-05	1714	1715	9.50589e-05	NA	NA	NA	NA	NA	NA	NA	NA	NA	93	94	2.86666e-06	340	341
ATFQFTFC	GCTACATTTCAGTTTACATTTTGT	Pool 13	8933	8934	0.00096694	6814	6815	0.000362607	1068	1069	1.74278e-05	5104	5105	8.26332e-05	NA	NA	NA	NA	NA	NA	NA	NA	NA	NA	NA	NA	NA	NA	NA	19138	19139	0.00105213	10756	10757	0.000596239	NA	NA	NA	NA	NA	NA	NA	NA	NA	2414	2415	7.36488e-05	2328	2329
ATFQINPF	GCGACATTCCAGATTAACCCATTC	Pool 13	1703	1704	0.000184426	810	811	4.3151e-05	474	475	7.74387e-06	1560	1561	2.52675e-05	NA	NA	NA	NA	NA	NA	NA	NA	NA	NA	NA	NA	NA	NA	NA	4512	4513	0.000248095	3398	3399	0.0001884	NA	NA	NA	NA	NA	NA	NA	NA	NA	33	34	1.03688e-06	550	551
ATFWFCTW	GCGACGTTTTGGTTCTGTACCTGG	Pool 13	201	202	2.18628e-05	738	739	3.93201e-05	22	23	3.74966e-07	180	181	2.9298e-06	NA	NA	NA	NA	NA	NA	NA	NA	NA	NA	NA	NA	NA	NA	NA	774	775	4.26043e-05	716	717	3.97418e-05	NA	NA	NA	NA	NA	NA	NA	NA	NA	29	30	9.14892e-07	32	33
ATHEYRTL	GCGACACACGAGTACAGAACCTTG	Pool 13	348	349	3.77728e-05	122	123	6.54448e-06	304	305	4.97238e-06	72	73	1.18163e-06	NA	NA	NA	NA	NA	NA	NA	NA	NA	NA	NA	NA	NA	NA	NA	904	905	4.97508e-05	730	731	4.05178e-05	NA	NA	NA	NA	NA	NA	NA	NA	NA	79	80	2.43971e-06	746	747
ATHPLFSL	GCCACACACCCTCTCTTTAGCCTC	Pool 13	77	78	8.44205e-06	NA	1	5.32072e-08	NA	1	1.63029e-08	NA	1	1.61867e-08	NA	NA	NA	NA	NA	NA	NA	NA	NA	NA	NA	NA	NA	NA	NA	90	91	5.00257e-06	126	127	7.03935e-06	NA	NA	NA	NA	NA	NA	NA	NA	NA	15	16	4.87942e-07	NA	1
ATIAFHQM	GCCACGATTGCATTTCATCAGATG	Pool 13	758	759	8.21477e-05	398	399	2.12297e-05	40	41	6.68418e-07	374	375	6.07002e-06	NA	NA	NA	NA	NA	NA	NA	NA	NA	NA	NA	NA	NA	NA	NA	2376	2377	0.000130672	3540	3541	0.00019627	NA	NA	NA	NA	NA	NA	NA	NA	NA	591	592	1.80539e-05	966	967
ATIFFTRL	GCGACTATATTCTTTACTCGGTTA	Pool 13	973	974	0.000105417	1006	1007	5.35796e-05	668	669	1.09066e-05	1628	1629	2.63682e-05	NA	NA	NA	NA	NA	NA	NA	NA	NA	NA	NA	NA	NA	NA	NA	2730	2731	0.000150132	1914	1915	0.000106145	NA	NA	NA	NA	NA	NA	NA	NA	NA	103	104	3.17162e-06	427	428
ATKAFHTL	GCCACTAAGGCCTTCCATACTCTT	Pool 13	4	5	5.41157e-07	NA	1	5.32072e-08	NA	1	1.63029e-08	NA	1	1.61867e-08	NA	NA	NA	NA	NA	NA	NA	NA	NA	NA	NA	NA	NA	NA	NA	NA	1	5.49733e-08	NA	1	5.5428e-08	NA	NA	NA	NA	NA	NA	NA	NA	NA	NA	1	3.04964e-08	NA	1
ATLDYMHL	GCTACATTGGACTACATGCACCTG	Pool 13	1992	1993	0.000215705	6370	6371	0.000338983	440	441	7.18957e-06	438	439	7.10597e-06	NA	NA	NA	NA	NA	NA	NA	NA	NA	NA	NA	NA	NA	NA	NA	4984	4985	0.000274042	2676	2677	0.000148381	NA	NA	NA	NA	NA	NA	NA	NA	NA	1324	1325	4.04077e-05	3877	3878
ATMLHVEL	GCTACAATGCTCCATGTAGAGTTA	Pool 13	1603	1604	0.000173603	350	351	1.86757e-05	24	25	4.07572e-07	202	203	3.28591e-06	NA	NA	NA	NA	NA	NA	NA	NA	NA	NA	NA	NA	NA	NA	NA	2412	2413	0.000132651	3306	3307	0.0001833	NA	NA	NA	NA	NA	NA	NA	NA	NA	40	41	1.25035e-06	84	85
ATPEWAAL	GCAACTCCAGAGTGGGCCGCGTTA	Pool 13	59	60	6.49389e-06	82	83	4.4162e-06	24	25	4.07572e-07	34	35	5.66535e-07	NA	NA	NA	NA	NA	NA	NA	NA	NA	NA	NA	NA	NA	NA	NA	174	175	9.62033e-06	112	113	6.26336e-06	NA	NA	NA	NA	NA	NA	NA	NA	NA	2	3	9.14892e-08	15	16
ATPRMIGL	GCTACACCACGTATGATCGGTTTG	Pool 13	3136	3137	0.000339522	648	649	3.45315e-05	234	235	3.83118e-06	396	397	6.42613e-06	NA	NA	NA	NA	NA	NA	NA	NA	NA	NA	NA	NA	NA	NA	NA	2376	2377	0.000130672	2838	2839	0.00015736	NA	NA	NA	NA	NA	NA	NA	NA	NA	321	322	9.81984e-06	566	567
ATPWFVTI	GCGACCCCGTGGTTTGTGACCATT	Pool 13	2615	2616	0.000283134	386	387	2.05912e-05	230	231	3.76597e-06	1616	1617	2.61739e-05	NA	NA	NA	NA	NA	NA	NA	NA	NA	NA	NA	NA	NA	NA	NA	3824	3825	0.000210273	5964	5965	0.000330628	NA	NA	NA	NA	NA	NA	NA	NA	NA	716	717	2.18659e-05	2114	2115
ATTYFTRL	GCGACCACTTATTTTACACGGCTG	Pool 13	302	303	3.27941e-05	182	183	9.73692e-06	48	49	7.98841e-07	94	95	1.53774e-06	NA	NA	NA	NA	NA	NA	NA	NA	NA	NA	NA	NA	NA	NA	NA	874	875	4.81016e-05	136	137	7.59363e-06	NA	NA	NA	NA	NA	NA	NA	NA	NA	13	14	4.26949e-07	224	225
ATVIRSPL	GCAACGGTCATACGGAGCCCGCTA	Pool 13	373	374	4.04786e-05	154	155	8.24711e-06	112	113	1.84223e-06	8	9	1.45681e-07	NA	NA	NA	NA	NA	NA	NA	NA	NA	NA	NA	NA	NA	NA	NA	948	949	5.21697e-05	1166	1167	6.46844e-05	NA	NA	NA	NA	NA	NA	NA	NA	NA	11	12	3.65957e-07	984	985
ATWRQIML	GCTACCTGGCGTCAGATAATGCTT	Pool 13	387	388	4.19938e-05	196	197	1.04818e-05	124	125	2.03786e-06	204	205	3.31828e-06	NA	NA	NA	NA	NA	NA	NA	NA	NA	NA	NA	NA	NA	NA	NA	1094	1095	6.01958e-05	666	667	3.69704e-05	NA	NA	NA	NA	NA	NA	NA	NA	NA	20	21	6.40424e-07	279	280
ATWSQTSL	GCGACATGGTCTCAAACAAGCCTC	Pool 13	NA	1	1.08231e-07	NA	1	5.32072e-08	NA	1	1.63029e-08	NA	1	1.61867e-08	NA	NA	NA	NA	NA	NA	NA	NA	NA	NA	NA	NA	NA	NA	NA	NA	1	5.49733e-08	NA	1	5.5428e-08	NA	NA	NA	NA	NA	NA	NA	NA	NA	2	3	9.14892e-08	NA	1
ATYRRLCL	GCCACCTATAGGAGGCTCTGCTTG	Pool 13	3508	3509	0.000379784	3302	3303	0.000175743	1874	1875	3.05679e-05	1612	1613	2.61092e-05	NA	NA	NA	NA	NA	NA	NA	NA	NA	NA	NA	NA	NA	NA	NA	6698	6699	0.000368266	5490	5491	0.000304355	NA	NA	NA	NA	NA	NA	NA	NA	NA	820	821	2.50375e-05	2173	2174
ATYSFCAF	GCAACATATTCCTTCTGCGCATTT	Pool 13	7212	7213	0.000780674	898	899	4.78333e-05	268	269	4.38548e-06	82	83	1.3435e-06	NA	NA	NA	NA	NA	NA	NA	NA	NA	NA	NA	NA	NA	NA	NA	5324	5325	0.000292733	6126	6127	0.000339607	NA	NA	NA	NA	NA	NA	NA	NA	NA	3601	3602	0.000109848	887	888
ATYTERAL	GCTACCTATACGGAGCGTGCACTG	Pool 13	1933	1934	0.00020932	940	941	5.0068e-05	148	149	2.42913e-06	1236	1237	2.0023e-05	NA	NA	NA	NA	NA	NA	NA	NA	NA	NA	NA	NA	NA	NA	NA	3382	3383	0.000185975	4238	4239	0.000234959	NA	NA	NA	NA	NA	NA	NA	NA	NA	152	153	4.66595e-06	875	876
ATYYFTTF	GCCACATATTATTTTACGACTTTT	Pool 13	1656	1657	0.00017934	1242	1243	6.61365e-05	322	323	5.26583e-06	544	545	8.82177e-06	NA	NA	NA	NA	NA	NA	NA	NA	NA	NA	NA	NA	NA	NA	NA	5066	5067	0.00027855	3822	3823	0.000211901	NA	NA	NA	NA	NA	NA	NA	NA	NA	171	172	5.24538e-06	673	674
ATYYGAFI	GCGACGTATTACGGGGCGTTTATT	Pool 13	126	127	1.37454e-05	140	141	7.50221e-06	124	125	2.03786e-06	8	9	1.45681e-07	NA	NA	NA	NA	NA	NA	NA	NA	NA	NA	NA	NA	NA	NA	NA	422	423	2.32537e-05	290	291	1.61295e-05	NA	NA	NA	NA	NA	NA	NA	NA	NA	9	10	3.04964e-07	12	13
AVDLYSML	GCTGTAGACCTTTATTCGATGTTG	Pool 13	739	740	8.00913e-05	98	99	5.26751e-06	66	67	1.09229e-06	64	65	1.05214e-06	NA	NA	NA	NA	NA	NA	NA	NA	NA	NA	NA	NA	NA	NA	NA	1528	1529	8.40542e-05	1092	1093	6.05828e-05	NA	NA	NA	NA	NA	NA	NA	NA	NA	72	73	2.22624e-06	111	112
AVEEFHNL	GCGGTGGAGGAATTTCACAACCTC	Pool 13	684	685	7.41386e-05	162	163	8.67277e-06	84	85	1.38574e-06	674	675	1.0926e-05	NA	NA	NA	NA	NA	NA	NA	NA	NA	NA	NA	NA	NA	NA	NA	3308	3309	0.000181907	1926	1927	0.00010681	NA	NA	NA	NA	NA	NA	NA	NA	NA	81	82	2.5007e-06	14	15
AVFAATGI	GCTGTATTCGCCGCTACTGGTATT	Pool 13	481	482	5.21676e-05	60	61	3.24564e-06	38	39	6.35812e-07	10	11	1.78054e-07	NA	NA	NA	NA	NA	NA	NA	NA	NA	NA	NA	NA	NA	NA	NA	920	921	5.06304e-05	1064	1065	5.90308e-05	NA	NA	NA	NA	NA	NA	NA	NA	NA	6	7	2.13475e-07	567	568
AVFFFIYL	GCTGTTTTCTTCTTTATCTATTTA	Pool 13	2378	2379	0.000257483	976	977	5.19834e-05	350	351	5.72231e-06	2344	2345	3.79579e-05	NA	NA	NA	NA	NA	NA	NA	NA	NA	NA	NA	NA	NA	NA	NA	4696	4697	0.00025821	6182	6183	0.000342711	NA	NA	NA	NA	NA	NA	NA	NA	NA	1493	1494	4.55616e-05	473	474
AVFIRASV	GCTGTTTTCATACGAGCCTCGGTT	Pool 13	42	43	4.65395e-06	NA	1	5.32072e-08	28	29	4.72784e-07	NA	1	1.61867e-08	NA	NA	NA	NA	NA	NA	NA	NA	NA	NA	NA	NA	NA	NA	NA	124	125	6.87166e-06	52	53	2.93768e-06	NA	NA	NA	NA	NA	NA	NA	NA	NA	13	14	4.26949e-07	3	4
AVFLGAEI	GCGGTGTTCCTTGGCGCGGAAATC	Pool 13	2160	2161	0.000233888	1200	1201	6.39018e-05	732	733	1.195e-05	24290	24291	0.000393192	NA	NA	NA	NA	NA	NA	NA	NA	NA	NA	NA	NA	NA	NA	NA	5968	5969	0.000328136	3822	3823	0.000211901	NA	NA	NA	NA	NA	NA	NA	NA	NA	2697	2698	8.22793e-05	687	688
AVFLIALV	GCCGTATTTCTTATAGCTTTAGTC	Pool 13	1546	1547	0.000167434	3118	3119	0.000165953	18770	18771	0.000306021	5980	5981	9.68128e-05	NA	NA	NA	NA	NA	NA	NA	NA	NA	NA	NA	NA	NA	NA	NA	3858	3859	0.000212142	3854	3855	0.000213675	NA	NA	NA	NA	NA	NA	NA	NA	NA	4179	4180	0.000127475	8762	8763
AVFLLRLM	GCTGTCTTTCTATTAAGGCTGATG	Pool 13	2001	2002	0.000216679	3612	3613	0.000192238	866	867	1.41346e-05	2646	2647	4.28463e-05	NA	NA	NA	NA	NA	NA	NA	NA	NA	NA	NA	NA	NA	NA	NA	6454	6455	0.000354853	4980	4981	0.000276087	NA	NA	NA	NA	NA	NA	NA	NA	NA	293	294	8.96594e-06	534	535
AVFLVGVL	GCAGTGTTCCTTGTAGGGGTCTTA	Pool 13	458	459	4.96782e-05	270	271	1.44191e-05	3982	3983	6.49344e-05	198	199	3.22116e-06	NA	NA	NA	NA	NA	NA	NA	NA	NA	NA	NA	NA	NA	NA	NA	1068	1069	5.87665e-05	986	987	5.47074e-05	NA	NA	NA	NA	NA	NA	NA	NA	NA	136	137	4.17801e-06	173	174
AVFRVGSV	GCAGTGTTTAGGGTGGGGTCAGTC	Pool 13	252	253	2.73826e-05	NA	1	5.32072e-08	NA	1	1.63029e-08	NA	1	1.61867e-08	NA	NA	NA	NA	NA	NA	NA	NA	NA	NA	NA	NA	NA	NA	NA	1260	1261	6.93213e-05	286	287	1.59078e-05	NA	NA	NA	NA	NA	NA	NA	NA	NA	NA	1	3.04964e-08	26	27
AVFVKNEL	GCCGTCTTCGTAAAGAACGAATTA	Pool 13	237	238	2.57591e-05	192	193	1.0269e-05	32	33	5.37995e-07	414	415	6.71749e-06	NA	NA	NA	NA	NA	NA	NA	NA	NA	NA	NA	NA	NA	NA	NA	860	861	4.7332e-05	4498	4499	0.00024937	NA	NA	NA	NA	NA	NA	NA	NA	NA	37	38	1.15886e-06	200	201
AVFVLTGL	GCGGTTTTCGTACTGACGGGATTG	Pool 13	406	407	4.40502e-05	82	83	4.4162e-06	28	29	4.72784e-07	NA	1	1.61867e-08	NA	NA	NA	NA	NA	NA	NA	NA	NA	NA	NA	NA	NA	NA	NA	636	637	3.5018e-05	1634	1635	9.06247e-05	NA	NA	NA	NA	NA	NA	NA	NA	NA	3	4	1.21986e-07	7	8
AVFWHSSA	GCGGTCTTCTGGCACTCTTCTGCT	Pool 13	31970	31971	0.00346027	182730	182731	0.0097226	511332	511333	0.0083362	518152	518153	0.0083872	NA	NA	NA	NA	NA	NA	NA	NA	NA	NA	NA	NA	NA	NA	NA	64118	64119	0.00352483	44176	44177	0.00244864	NA	NA	NA	NA	NA	NA	NA	NA	NA	346918	346919	0.0105798	314938	314939
AVFYAACV	GCTGTGTTCTATGCAGCATGCGTG	Pool 13	1311	1312	0.000142	620	621	3.30417e-05	32	33	5.37995e-07	840	841	1.3613e-05	NA	NA	NA	NA	NA	NA	NA	NA	NA	NA	NA	NA	NA	NA	NA	4718	4719	0.000259419	9848	9849	0.00054591	NA	NA	NA	NA	NA	NA	NA	NA	NA	42	43	1.31134e-06	119	120
AVFYICIL	GCCGTGTTCTACATTTGTATCCTC	Pool 13	896	897	9.70836e-05	106	107	5.69317e-06	62	63	1.02708e-06	192	193	3.12404e-06	NA	NA	NA	NA	NA	NA	NA	NA	NA	NA	NA	NA	NA	NA	NA	2724	2725	0.000149802	1424	1425	7.89848e-05	NA	NA	NA	NA	NA	NA	NA	NA	NA	36	37	1.12837e-06	159	160
AVFYIPMF	GCTGTTTTCTACATTCCGATGTTT	Pool 13	5545	5546	0.000600252	5442	5443	0.000289607	1378	1379	2.24817e-05	18994	18995	0.000307467	NA	NA	NA	NA	NA	NA	NA	NA	NA	NA	NA	NA	NA	NA	NA	12924	12925	0.00071053	18952	18953	0.00105053	NA	NA	NA	NA	NA	NA	NA	NA	NA	2880	2881	8.78601e-05	2591	2592
AVGFFISL	GCGGTAGGTTTCTTCATATCGCTT	Pool 13	1856	1857	0.000200986	852	853	4.53857e-05	548	549	8.95028e-06	1534	1535	2.48466e-05	NA	NA	NA	NA	NA	NA	NA	NA	NA	NA	NA	NA	NA	NA	NA	4524	4525	0.000248754	6042	6043	0.000334951	NA	NA	NA	NA	NA	NA	NA	NA	NA	133	134	4.08652e-06	1475	1476
AVGWFHSL	GCCGTCGGATGGTTCCACTCTTTG	Pool 13	1983	1984	0.000214731	1144	1145	6.09222e-05	316	317	5.16801e-06	1972	1973	3.19364e-05	NA	NA	NA	NA	NA	NA	NA	NA	NA	NA	NA	NA	NA	NA	NA	3872	3873	0.000212912	3070	3071	0.000170219	NA	NA	NA	NA	NA	NA	NA	NA	NA	179	180	5.48935e-06	117	118
AVHFFTGM	GCTGTACACTTCTTTACAGGTATG	Pool 13	30712	30713	0.00332411	1162	1163	6.188e-05	838	839	1.36781e-05	2702	2703	4.37527e-05	NA	NA	NA	NA	NA	NA	NA	NA	NA	NA	NA	NA	NA	NA	NA	9564	9565	0.00052582	9964	9965	0.00055234	NA	NA	NA	NA	NA	NA	NA	NA	NA	977	978	2.98255e-05	968	969
AVHLFALL	GCCGTCCATTTGTTCGCTCTACTC	Pool 13	2994	2995	0.000324153	632	633	3.36802e-05	54	55	8.96658e-07	1018	1019	1.64943e-05	NA	NA	NA	NA	NA	NA	NA	NA	NA	NA	NA	NA	NA	NA	NA	4088	4089	0.000224786	2596	2597	0.000143946	NA	NA	NA	NA	NA	NA	NA	NA	NA	86	87	2.65319e-06	58	59
AVHLFVLV	GCAGTGCATTTGTTTGTGCTGGTA	Pool 13	881	882	9.54602e-05	704	705	3.75111e-05	320	321	5.23322e-06	80	81	1.31112e-06	NA	NA	NA	NA	NA	NA	NA	NA	NA	NA	NA	NA	NA	NA	NA	2890	2891	0.000158928	3274	3275	0.000181527	NA	NA	NA	NA	NA	NA	NA	NA	NA	326	327	9.97232e-06	778	779
AVHWVATL	GCAGTTCATTGGGTAGCTACCCTT	Pool 13	862	863	9.34038e-05	164	165	8.77919e-06	72	73	1.19011e-06	60	61	9.8739e-07	NA	NA	NA	NA	NA	NA	NA	NA	NA	NA	NA	NA	NA	NA	NA	1554	1555	8.54835e-05	1768	1769	9.80521e-05	NA	NA	NA	NA	NA	NA	NA	NA	NA	92	93	2.83616e-06	2528	2529
AVHYVSGL	GCGGTGCACTACGTGTCGGGACTA	Pool 13	1298	1299	0.000140593	152	153	8.1407e-06	22	23	3.74966e-07	254	255	4.12762e-06	NA	NA	NA	NA	NA	NA	NA	NA	NA	NA	NA	NA	NA	NA	NA	3082	3083	0.000169483	1648	1649	9.14007e-05	NA	NA	NA	NA	NA	NA	NA	NA	NA	54	55	1.6773e-06	203	204
AVICFFSV	GCCGTAATCTGCTTCTTTTCAGTT	Pool 13	6414	6415	0.000694305	7618	7619	0.000405386	2910	2911	4.74577e-05	2610	2611	4.22635e-05	NA	NA	NA	NA	NA	NA	NA	NA	NA	NA	NA	NA	NA	NA	NA	8790	8791	0.00048327	6272	6273	0.0003477	NA	NA	NA	NA	NA	NA	NA	NA	NA	71276	71277	0.00217369	1995	1996
AVIGFGVL	GCCGTGATCGGGTTTGGGGTCCTT	Pool 13	414	415	4.49161e-05	204	205	1.09075e-05	120	121	1.97265e-06	118	119	1.92622e-06	NA	NA	NA	NA	NA	NA	NA	NA	NA	NA	NA	NA	NA	NA	NA	906	907	4.98608e-05	884	885	4.90537e-05	NA	NA	NA	NA	NA	NA	NA	NA	NA	371	372	1.13447e-05	441	442
AVILLPRL	GCCGTAATCCTTTTGCCAAGACTG	Pool 13	4791	4792	0.000518645	3874	3875	0.000206178	20148	20149	0.000328487	2390	2391	3.87025e-05	NA	NA	NA	NA	NA	NA	NA	NA	NA	NA	NA	NA	NA	NA	NA	9592	9593	0.000527359	7524	7525	0.000417095	NA	NA	NA	NA	NA	NA	NA	NA	NA	6475	6476	0.000197495	3406	3407
AVLLYEYV	GCGGTATTATTATATGAATACGTT	Pool 13	850	851	9.2105e-05	608	609	3.24032e-05	86	87	1.41835e-06	198	199	3.22116e-06	NA	NA	NA	NA	NA	NA	NA	NA	NA	NA	NA	NA	NA	NA	NA	2266	2267	0.000124624	1946	1947	0.000107918	NA	NA	NA	NA	NA	NA	NA	NA	NA	44	45	1.37234e-06	209	210
AVLRYTKL	GCCGTCTTACGTTATACGAAATTA	Pool 13	568	569	6.15837e-05	266	267	1.42063e-05	112	113	1.84223e-06	164	165	2.67081e-06	NA	NA	NA	NA	NA	NA	NA	NA	NA	NA	NA	NA	NA	NA	NA	1796	1797	9.8787e-05	2372	2373	0.000131531	NA	NA	NA	NA	NA	NA	NA	NA	NA	103	104	3.17162e-06	71	72
AVLTCVPL	GCTGTCCTTACGTGTGTTCCTCTG	Pool 13	313	314	3.39847e-05	600	601	3.19775e-05	326	327	5.33104e-06	10	11	1.78054e-07	NA	NA	NA	NA	NA	NA	NA	NA	NA	NA	NA	NA	NA	NA	NA	972	973	5.3489e-05	780	781	4.32892e-05	NA	NA	NA	NA	NA	NA	NA	NA	NA	699	700	2.13475e-05	29	30
AVLTFRRL	GCCGTTCTAACGTTCAGACGGCTG	Pool 13	3968	3969	0.000429571	14588	14589	0.00077624	50154	50155	0.000817671	62922	62923	0.00101852	NA	NA	NA	NA	NA	NA	NA	NA	NA	NA	NA	NA	NA	NA	NA	4266	4267	0.000234571	3804	3805	0.000210903	NA	NA	NA	NA	NA	NA	NA	NA	NA	30013	30014	0.000915319	47205	47206
AVMMWASL	GCGGTAATGATGTGGGCGTCGCTT	Pool 13	2819	2820	0.000305213	5110	5111	0.000271942	16736	16737	0.000272861	28270	28271	0.000457615	NA	NA	NA	NA	NA	NA	NA	NA	NA	NA	NA	NA	NA	NA	NA	7062	7063	0.000388276	4722	4723	0.000261786	NA	NA	NA	NA	NA	NA	NA	NA	NA	7047	7048	0.000214939	4429	4430
AVMVFALV	GCTGTGATGGTATTCGCTTTGGTG	Pool 13	1763	1764	0.00019092	522	523	2.78274e-05	366	367	5.98316e-06	948	949	1.53612e-05	NA	NA	NA	NA	NA	NA	NA	NA	NA	NA	NA	NA	NA	NA	NA	8386	8387	0.000461061	2556	2557	0.000141729	NA	NA	NA	NA	NA	NA	NA	NA	NA	199	200	6.09928e-06	1001	1002
AVMWSHLL	GCAGTCATGTGGTCTCACTTACTA	Pool 13	540	541	5.85532e-05	96	97	5.1611e-06	12	13	2.11937e-07	142	143	2.3147e-06	NA	NA	NA	NA	NA	NA	NA	NA	NA	NA	NA	NA	NA	NA	NA	1896	1897	0.000104284	1512	1513	8.38625e-05	NA	NA	NA	NA	NA	NA	NA	NA	NA	17	18	5.48935e-07	22	23
AVNFFGTV	GCTGTTAACTTCTTTGGGACAGTT	Pool 13	1013	1014	0.000109747	354	355	1.88886e-05	156	157	2.55955e-06	680	681	1.10232e-05	NA	NA	NA	NA	NA	NA	NA	NA	NA	NA	NA	NA	NA	NA	NA	2704	2705	0.000148703	1880	1881	0.00010426	NA	NA	NA	NA	NA	NA	NA	NA	NA	384	385	1.17411e-05	254	255
AVNMFRTL	GCGGTAAATATGTTTCGTACACTA	Pool 13	934	935	0.000101196	242	243	1.29293e-05	120	121	1.97265e-06	258	259	4.19236e-06	NA	NA	NA	NA	NA	NA	NA	NA	NA	NA	NA	NA	NA	NA	NA	2776	2777	0.000152661	1732	1733	9.60566e-05	NA	NA	NA	NA	NA	NA	NA	NA	NA	828	829	2.52815e-05	96	97
AVNYFTNI	GCGGTTAACTATTTTACAAATATT	Pool 13	1078	1079	0.000116782	4954	4955	0.000263642	536	537	8.75465e-06	962	963	1.55878e-05	NA	NA	NA	NA	NA	NA	NA	NA	NA	NA	NA	NA	NA	NA	NA	3386	3387	0.000186195	2938	2939	0.000162903	NA	NA	NA	NA	NA	NA	NA	NA	NA	1086	1087	3.31496e-05	1860	1861
AVPGYLSL	GCCGTACCAGGATACCTTTCGTTA	Pool 13	677	678	7.33809e-05	732	733	3.90009e-05	382	383	6.244e-06	1732	1733	2.80516e-05	NA	NA	NA	NA	NA	NA	NA	NA	NA	NA	NA	NA	NA	NA	NA	1796	1797	9.8787e-05	1128	1129	6.25782e-05	NA	NA	NA	NA	NA	NA	NA	NA	NA	34	35	1.06737e-06	689	690
AVPVFDLL	GCGGTGCCTGTATTTGACTTATTG	Pool 13	952	953	0.000103145	312	313	1.66539e-05	756	757	1.23413e-05	1238	1239	2.00554e-05	NA	NA	NA	NA	NA	NA	NA	NA	NA	NA	NA	NA	NA	NA	NA	2352	2353	0.000129352	2012	2013	0.000111576	NA	NA	NA	NA	NA	NA	NA	NA	NA	337	338	1.03078e-05	237	238
AVQAFVFL	GCCGTCCAAGCCTTTGTCTTTCTG	Pool 13	839	840	9.09144e-05	1910	1911	0.000101679	4066	4067	6.63038e-05	4106	4107	6.64789e-05	NA	NA	NA	NA	NA	NA	NA	NA	NA	NA	NA	NA	NA	NA	NA	1900	1901	0.000104504	2534	2535	0.00014051	NA	NA	NA	NA	NA	NA	NA	NA	NA	332	333	1.01553e-05	3692	3693
AVQFVSSL	GCTGTTCAGTTTGTTTCTAGCCTG	Pool 13	9065	9066	0.000981226	1024	1025	5.45374e-05	180	181	2.95082e-06	572	573	9.27499e-06	NA	NA	NA	NA	NA	NA	NA	NA	NA	NA	NA	NA	NA	NA	NA	6420	6421	0.000352984	7040	7041	0.000390268	NA	NA	NA	NA	NA	NA	NA	NA	NA	883	884	2.69588e-05	804	805
AVQLFMFL	GCTGTTCAGCTCTTTATGTTCCTG	Pool 13	18862	18863	0.00204157	5808	5809	0.000309081	2584	2585	4.21429e-05	7332	7333	0.000118697	NA	NA	NA	NA	NA	NA	NA	NA	NA	NA	NA	NA	NA	NA	NA	25758	25759	0.00141606	17678	17679	0.000979911	NA	NA	NA	NA	NA	NA	NA	NA	NA	278700	278701	0.00849937	7627	7628
AVRCFALF	GCAGTACGTTGTTTTGCGCTATTT	Pool 13	3036	3037	0.000328699	1476	1477	7.8587e-05	844	845	1.37759e-05	15450	15451	0.000250101	NA	NA	NA	NA	NA	NA	NA	NA	NA	NA	NA	NA	NA	NA	NA	9124	9125	0.000501631	6294	6295	0.000348919	NA	NA	NA	NA	NA	NA	NA	NA	NA	851	852	2.59829e-05	532	533
AVRPYAGM	GCCGTGCGCCCCTATGCTGGCATG	Pool 13	56	57	6.16919e-06	20	21	1.11735e-06	NA	1	1.63029e-08	NA	1	1.61867e-08	NA	NA	NA	NA	NA	NA	NA	NA	NA	NA	NA	NA	NA	NA	NA	138	139	7.64129e-06	160	161	8.9239e-06	NA	NA	NA	NA	NA	NA	NA	NA	NA	NA	1	3.04964e-08	NA	1
AVTFVCSL	GCGGTTACCTTTGTGTGTAGCTTG	Pool 13	1050	1051	0.000113751	1044	1045	5.56015e-05	644	645	1.05154e-05	608	609	9.85772e-06	NA	NA	NA	NA	NA	NA	NA	NA	NA	NA	NA	NA	NA	NA	NA	3248	3249	0.000178608	3348	3349	0.000185628	NA	NA	NA	NA	NA	NA	NA	NA	NA	95	96	2.92765e-06	4545	4546
AVVRIVNL	GCAGTCGTACGAATTGTCAATTTG	Pool 13	2715	2716	0.000293957	5368	5369	0.000285669	1118	1119	1.82429e-05	1324	1325	2.14474e-05	NA	NA	NA	NA	NA	NA	NA	NA	NA	NA	NA	NA	NA	NA	NA	11656	11657	0.000640824	5680	5681	0.000314886	NA	NA	NA	NA	NA	NA	NA	NA	NA	4097	4098	0.000124974	7480	7481
AVVTFLFL	GCAGTAGTCACGTTCCTCTTTCTT	Pool 13	2765	2766	0.000299368	2638	2639	0.000140414	1068	1069	1.74278e-05	4058	4059	6.57019e-05	NA	NA	NA	NA	NA	NA	NA	NA	NA	NA	NA	NA	NA	NA	NA	7624	7625	0.000419171	5936	5937	0.000329076	NA	NA	NA	NA	NA	NA	NA	NA	NA	1901	1902	5.80041e-05	5202	5203
AVWFLSNI	GCAGTGTGGTTCCTTAGTAACATC	Pool 13	1991	1992	0.000215597	9384	9385	0.000499349	376	377	6.14619e-06	1708	1709	2.76631e-05	NA	NA	NA	NA	NA	NA	NA	NA	NA	NA	NA	NA	NA	NA	NA	4956	4957	0.000272503	7154	7155	0.000396587	NA	NA	NA	NA	NA	NA	NA	NA	NA	414	415	1.2656e-05	1636	1637
AVYAALGL	GCGGTATATGCCGCACTTGGTTTG	Pool 13	489	490	5.30334e-05	144	145	7.71504e-06	120	121	1.97265e-06	344	345	5.58442e-06	NA	NA	NA	NA	NA	NA	NA	NA	NA	NA	NA	NA	NA	NA	NA	1354	1355	7.44888e-05	392	393	2.17832e-05	NA	NA	NA	NA	NA	NA	NA	NA	NA	68	69	2.10425e-06	198	199
AVYEYFRA	GCTGTATACGAGTACTTTAGAGCG	Pool 13	95	96	1.03902e-05	64	65	3.45847e-06	4	5	8.15144e-08	8	9	1.45681e-07	NA	NA	NA	NA	NA	NA	NA	NA	NA	NA	NA	NA	NA	NA	NA	264	265	1.45679e-05	186	187	1.0365e-05	NA	NA	NA	NA	NA	NA	NA	NA	NA	24	25	7.6241e-07	7	8
AVYKMADV	GCAGTGTATAAAATGGCCGATGTT	Pool 13	2059	2060	0.000222957	2108	2109	0.000112214	122	123	2.00525e-06	1852	1853	2.9994e-05	NA	NA	NA	NA	NA	NA	NA	NA	NA	NA	NA	NA	NA	NA	NA	3564	3565	0.00019598	3672	3673	0.000203587	NA	NA	NA	NA	NA	NA	NA	NA	NA	52	53	1.61631e-06	7276	7277
AVYLLAHA	GCCGTATACCTCTTAGCCCACGCC	Pool 13	21	22	2.38109e-06	12	13	6.91693e-07	NA	1	1.63029e-08	4	5	8.09336e-08	NA	NA	NA	NA	NA	NA	NA	NA	NA	NA	NA	NA	NA	NA	NA	48	49	2.69369e-06	18	19	1.05313e-06	NA	NA	NA	NA	NA	NA	NA	NA	NA	NA	1	3.04964e-08	NA	1
AVYMAIGF	GCAGTATACATGGCTATAGGTTTT	Pool 13	4482	4483	0.000485202	2402	2403	0.000127857	2152	2153	3.51001e-05	7644	7645	0.000123748	NA	NA	NA	NA	NA	NA	NA	NA	NA	NA	NA	NA	NA	NA	NA	13024	13025	0.000716027	9596	9597	0.000531942	NA	NA	NA	NA	NA	NA	NA	NA	NA	9613	9614	0.000293192	2200	2201
AVYQLLGL	GCTGTGTATCAGTTGTTGGGACTG	Pool 13	187	188	2.03475e-05	8	9	4.78865e-07	400	401	6.53746e-06	168	169	2.73556e-06	NA	NA	NA	NA	NA	NA	NA	NA	NA	NA	NA	NA	NA	NA	NA	548	549	3.01803e-05	250	251	1.39124e-05	NA	NA	NA	NA	NA	NA	NA	NA	NA	12	13	3.96453e-07	26	27
AVYRKLGV	GCCGTCTATAGAAAACTAGGGGTG	Pool 13	122	123	1.33125e-05	30	31	1.64942e-06	NA	1	1.63029e-08	2	3	4.85602e-08	NA	NA	NA	NA	NA	NA	NA	NA	NA	NA	NA	NA	NA	NA	NA	242	243	1.33585e-05	94	95	5.26566e-06	NA	NA	NA	NA	NA	NA	NA	NA	NA	NA	1	3.04964e-08	7	8
AVYRMTYV	GCTGTCTATCGTATGACGTACGTT	Pool 13	2478	2479	0.000268306	2050	2051	0.000109128	806	807	1.31564e-05	952	953	1.5426e-05	NA	NA	NA	NA	NA	NA	NA	NA	NA	NA	NA	NA	NA	NA	NA	8516	8517	0.000468208	4920	4921	0.000272761	NA	NA	NA	NA	NA	NA	NA	NA	NA	527	528	1.61021e-05	407	408
AVYRYMDT	GCCGTGTACCGGTATATGGATACG	Pool 13	1036	1037	0.000112236	854	855	4.54921e-05	742	743	1.2113e-05	92	93	1.50537e-06	NA	NA	NA	NA	NA	NA	NA	NA	NA	NA	NA	NA	NA	NA	NA	3080	3081	0.000169373	2714	2715	0.000150487	NA	NA	NA	NA	NA	NA	NA	NA	NA	162	163	4.97091e-06	490	491
AVYSHFYV	GCAGTCTACTCCCACTTCTACGTA	Pool 13	396	397	4.29679e-05	60	61	3.24564e-06	1182	1183	1.92863e-05	8	9	1.45681e-07	NA	NA	NA	NA	NA	NA	NA	NA	NA	NA	NA	NA	NA	NA	NA	1016	1017	5.59078e-05	1194	1195	6.62364e-05	NA	NA	NA	NA	NA	NA	NA	NA	NA	599	600	1.82978e-05	94	95
AWFEQFVL	GCATGGTTTGAACAATTTGTGCTC	Pool 13	861	862	9.32955e-05	1786	1787	9.50813e-05	2308	2309	3.76434e-05	14630	14631	0.000236828	NA	NA	NA	NA	NA	NA	NA	NA	NA	NA	NA	NA	NA	NA	NA	2190	2191	0.000120447	4008	4009	0.000222211	NA	NA	NA	NA	NA	NA	NA	NA	NA	1745	1746	5.32467e-05	3939	3940
AWFFCLLL	GCGTGGTTCTTTTGCCTCTTGCTA	Pool 13	401	402	4.35091e-05	100	101	5.37393e-06	154	155	2.52695e-06	488	489	7.91531e-06	NA	NA	NA	NA	NA	NA	NA	NA	NA	NA	NA	NA	NA	NA	NA	830	831	4.56828e-05	964	965	5.3488e-05	NA	NA	NA	NA	NA	NA	NA	NA	NA	909	910	2.77517e-05	828	829
AWYFNGAL	GCTTGGTATTTCAACGGAGCTCTC	Pool 13	653	654	7.07834e-05	302	303	1.61218e-05	128	129	2.10307e-06	26	27	4.37042e-07	NA	NA	NA	NA	NA	NA	NA	NA	NA	NA	NA	NA	NA	NA	NA	2586	2587	0.000142216	1902	1903	0.000105479	NA	NA	NA	NA	NA	NA	NA	NA	NA	199	200	6.09928e-06	1211	1212
AYDIYSRL	GCTTACGACATATATTCGCGTCTT	Pool 13	11787	11788	0.00127583	21970	21971	0.00116902	4640	4641	7.56617e-05	11880	11881	0.000192315	NA	NA	NA	NA	NA	NA	NA	NA	NA	NA	NA	NA	NA	NA	NA	49052	49053	0.00269661	22766	22767	0.00126193	NA	NA	NA	NA	NA	NA	NA	NA	NA	19731	19732	0.000601755	9061	9062
AYFESPNL	GCGTACTTTGAGTCTCCTAATCTC	Pool 13	2922	2923	0.000316361	1256	1257	6.68814e-05	718	719	1.17218e-05	1106	1107	1.79187e-05	NA	NA	NA	NA	NA	NA	NA	NA	NA	NA	NA	NA	NA	NA	NA	7006	7007	0.000385198	6012	6013	0.000333288	NA	NA	NA	NA	NA	NA	NA	NA	NA	348	349	1.06432e-05	800	801
AYFRIKLM	GCTTATTTTCGCATTAAACTCATG	Pool 13	89	90	9.74083e-06	NA	1	5.32072e-08	40	41	6.68418e-07	NA	1	1.61867e-08	NA	NA	NA	NA	NA	NA	NA	NA	NA	NA	NA	NA	NA	NA	NA	168	169	9.29049e-06	162	163	9.03476e-06	NA	NA	NA	NA	NA	NA	NA	NA	NA	NA	1	3.04964e-08	NA	1
AYGRHAGL	GCGTACGGCCGTCATGCGGGTCTG	Pool 13	3530	3531	0.000382165	1546	1547	8.23115e-05	122	123	2.00525e-06	2032	2033	3.29076e-05	NA	NA	NA	NA	NA	NA	NA	NA	NA	NA	NA	NA	NA	NA	NA	6432	6433	0.000353643	6924	6925	0.000383839	NA	NA	NA	NA	NA	NA	NA	NA	NA	3029	3030	9.24041e-05	6206	6207
AYINMVPL	GCTTACATTAATATGGTGCCACTG	Pool 13	286	287	3.10624e-05	382	383	2.03784e-05	134	135	2.20089e-06	562	563	9.11313e-06	NA	NA	NA	NA	NA	NA	NA	NA	NA	NA	NA	NA	NA	NA	NA	772	773	4.24944e-05	956	957	5.30446e-05	NA	NA	NA	NA	NA	NA	NA	NA	NA	28	29	8.84395e-07	113	114
AYIYFTDF	GCATACATTTATTTCACAGATTTT	Pool 13	882	883	9.55684e-05	994	995	5.29412e-05	248	249	4.05942e-06	984	985	1.59439e-05	NA	NA	NA	NA	NA	NA	NA	NA	NA	NA	NA	NA	NA	NA	NA	2666	2667	0.000146614	5408	5409	0.00029981	NA	NA	NA	NA	NA	NA	NA	NA	NA	213	214	6.52623e-06	1841	1842
AYKYLAAL	GCGTACAAATATCTAGCGGCTTTG	Pool 13	3376	3377	0.000365498	1930	1931	0.000102743	656	657	1.0711e-05	850	851	1.37749e-05	NA	NA	NA	NA	NA	NA	NA	NA	NA	NA	NA	NA	NA	NA	NA	6610	6611	0.000363429	4066	4067	0.000225425	NA	NA	NA	NA	NA	NA	NA	NA	NA	427	428	1.30525e-05	761	762
AYLMSQPL	GCCTATCTAATGTCCCAGCCCTTG	Pool 13	692	693	7.50044e-05	1030	1031	5.48566e-05	16	17	2.77149e-07	1852	1853	2.9994e-05	NA	NA	NA	NA	NA	NA	NA	NA	NA	NA	NA	NA	NA	NA	NA	3254	3255	0.000178938	1732	1733	9.60566e-05	NA	NA	NA	NA	NA	NA	NA	NA	NA	229	230	7.01417e-06	303	304
AYWMKTPL	GCATATTGGATGAAGACGCCGTTG	Pool 13	245	246	2.66249e-05	148	149	7.92787e-06	42	43	7.01024e-07	8	9	1.45681e-07	NA	NA	NA	NA	NA	NA	NA	NA	NA	NA	NA	NA	NA	NA	NA	1254	1255	6.89915e-05	412	413	2.28917e-05	NA	NA	NA	NA	NA	NA	NA	NA	NA	35	36	1.09787e-06	194	195
AYYFIGFL	GCCTATTATTTCATCGGCTTTCTC	Pool 13	399	400	4.32926e-05	148	149	7.92787e-06	156	157	2.55955e-06	18	19	3.07548e-07	NA	NA	NA	NA	NA	NA	NA	NA	NA	NA	NA	NA	NA	NA	NA	1474	1475	8.10856e-05	1112	1113	6.16913e-05	NA	NA	NA	NA	NA	NA	NA	NA	NA	41	42	1.28085e-06	45	46
AYYLTYIL	GCGTACTATCTGACCTATATCCTG	Pool 13	1360	1361	0.000147303	912	913	4.85782e-05	468	469	7.64605e-06	1364	1365	2.20949e-05	NA	NA	NA	NA	NA	NA	NA	NA	NA	NA	NA	NA	NA	NA	NA	3558	3559	0.00019565	3408	3409	0.000188954	NA	NA	NA	NA	NA	NA	NA	NA	NA	150	151	4.60496e-06	494	495
AYYLYIPL	GCCTATTATTTGTATATCCCGCTC	Pool 13	967	968	0.000104768	246	247	1.31422e-05	214	215	3.50512e-06	116	117	1.89385e-06	NA	NA	NA	NA	NA	NA	NA	NA	NA	NA	NA	NA	NA	NA	NA	3118	3119	0.000171462	6628	6629	0.000367432	NA	NA	NA	NA	NA	NA	NA	NA	NA	236	237	7.22764e-06	30	31
AYYSLQCL	GCGTACTACTCACTTCAATGCTTG	Pool 13	992	993	0.000107474	384	385	2.04848e-05	96	97	1.58138e-06	86	87	1.40825e-06	NA	NA	NA	NA	NA	NA	NA	NA	NA	NA	NA	NA	NA	NA	NA	2076	2077	0.00011418	1462	1463	8.10911e-05	NA	NA	NA	NA	NA	NA	NA	NA	NA	600	601	1.83283e-05	436	437
AYYVSGVL	GCTTACTACGTTTCAGGCGTATTG	Pool 13	1216	1217	0.000131718	1208	1209	6.43275e-05	538	539	8.78725e-06	644	645	1.04404e-05	NA	NA	NA	NA	NA	NA	NA	NA	NA	NA	NA	NA	NA	NA	NA	2778	2779	0.000152771	4032	4033	0.000223541	NA	NA	NA	NA	NA	NA	NA	NA	NA	1142	1143	3.48574e-05	334	335
CAHIYSAL	TGTGCACACATTTATAGCGCCCTT	Pool 13	160	161	1.74253e-05	76	77	4.09695e-06	2	3	4.89086e-08	NA	1	1.61867e-08	NA	NA	NA	NA	NA	NA	NA	NA	NA	NA	NA	NA	NA	NA	NA	344	345	1.89658e-05	310	311	1.72381e-05	NA	NA	NA	NA	NA	NA	NA	NA	NA	NA	1	3.04964e-08	NA	1
CALALAYL	TGCGCCCTTGCCCTCGCATATCTC	Pool 13	81	82	8.87498e-06	116	117	6.22524e-06	NA	1	1.63029e-08	2	3	4.85602e-08	NA	NA	NA	NA	NA	NA	NA	NA	NA	NA	NA	NA	NA	NA	NA	174	175	9.62033e-06	50	51	2.82683e-06	NA	NA	NA	NA	NA	NA	NA	NA	NA	2	3	9.14892e-08	NA	1
CAYSRVHL	TGTGCGTACAGTCGAGTGCACCTG	Pool 13	123	124	1.34207e-05	546	547	2.91043e-05	8	9	1.46726e-07	186	187	3.02692e-06	NA	NA	NA	NA	NA	NA	NA	NA	NA	NA	NA	NA	NA	NA	NA	136	137	7.53134e-06	26	27	1.49655e-06	NA	NA	NA	NA	NA	NA	NA	NA	NA	4	5	1.52482e-07	14	15
CGAFYLPL	TGCGGCGCCTTTTATCTCCCATTG	Pool 13	86938	86939	0.00940954	1127164	1127165	0.0599733	2539348	2539349	0.0413987	830632	830633	0.0134452	NA	NA	NA	NA	NA	NA	NA	NA	NA	NA	NA	NA	NA	NA	NA	120164	120165	0.00660587	66030	66031	0.00365996	NA	NA	NA	NA	NA	NA	NA	NA	NA	802656	802657	0.0244781	892381	892382
CGFPFLLL	TGTGGATTTCCGTTCCTCCTACTT	Pool 13	815	816	8.83169e-05	958	959	5.10257e-05	216	217	3.53773e-06	1048	1049	1.69799e-05	NA	NA	NA	NA	NA	NA	NA	NA	NA	NA	NA	NA	NA	NA	NA	5572	5573	0.000306366	2036	2037	0.000112907	NA	NA	NA	NA	NA	NA	NA	NA	NA	1543	1544	4.70864e-05	110	111
CGFVIAHL	TGTGGATTTGTTATAGCTCATTTA	Pool 13	4077	4078	0.000441368	2418	2419	0.000128708	532	533	8.68944e-06	1348	1349	2.18359e-05	NA	NA	NA	NA	NA	NA	NA	NA	NA	NA	NA	NA	NA	NA	NA	12558	12559	0.00069041	11026	11027	0.000611204	NA	NA	NA	NA	NA	NA	NA	NA	NA	890	891	2.71723e-05	1464	1465
CGFVKGAL	TGCGGTTTTGTGAAAGGCGCCTTG	Pool 13	4793	4794	0.000518862	120	121	6.43807e-06	78	79	1.28793e-06	210	211	3.4154e-06	NA	NA	NA	NA	NA	NA	NA	NA	NA	NA	NA	NA	NA	NA	NA	1152	1153	6.33842e-05	504	505	2.79911e-05	NA	NA	NA	NA	NA	NA	NA	NA	NA	80	81	2.47021e-06	48	49
CGKAFSQL	TGCGGTAAGGCATTCTCCCAACTA	Pool 13	1643	1644	0.000177933	4246	4247	0.000225971	12862	12863	0.000209704	68508	68509	0.00110894	NA	NA	NA	NA	NA	NA	NA	NA	NA	NA	NA	NA	NA	NA	NA	4300	4301	0.00023644	6774	6775	0.000375524	NA	NA	NA	NA	NA	NA	NA	NA	NA	6803	6804	0.000207497	5266	5267
CGKRFAEL	TGTGGTAAACGATTCGCCGAGTTG	Pool 13	319	320	3.46341e-05	444	445	2.36772e-05	314	315	5.13541e-06	856	857	1.3872e-05	NA	NA	NA	NA	NA	NA	NA	NA	NA	NA	NA	NA	NA	NA	NA	1182	1183	6.50334e-05	1184	1185	6.56821e-05	NA	NA	NA	NA	NA	NA	NA	NA	NA	624	625	1.90602e-05	747	748
CGLGYRTL	TGTGGACTGGGGTATCGAACGCTG	Pool 13	299	300	3.24694e-05	24	25	1.33018e-06	4	5	8.15144e-08	4	5	8.09336e-08	NA	NA	NA	NA	NA	NA	NA	NA	NA	NA	NA	NA	NA	NA	NA	436	437	2.40233e-05	1056	1057	5.85873e-05	NA	NA	NA	NA	NA	NA	NA	NA	NA	NA	1	3.04964e-08	NA	1
CGRRFGRL	TGTGGGCGACGGTTCGGGAGGTTG	Pool 13	41	42	4.54572e-06	NA	1	5.32072e-08	NA	1	1.63029e-08	NA	1	1.61867e-08	NA	NA	NA	NA	NA	NA	NA	NA	NA	NA	NA	NA	NA	NA	NA	80	81	4.45284e-06	280	281	1.55753e-05	NA	NA	NA	NA	NA	NA	NA	NA	NA	NA	1	3.04964e-08	NA	1
CGTVFPLL	TGCGGTACAGTATTCCCTCTATTG	Pool 13	2665	2666	0.000288545	1428	1429	7.60331e-05	3482	3483	5.67829e-05	2312	2313	3.74399e-05	NA	NA	NA	NA	NA	NA	NA	NA	NA	NA	NA	NA	NA	NA	NA	4768	4769	0.000262168	4958	4959	0.000274867	NA	NA	NA	NA	NA	NA	NA	NA	NA	22384	22385	0.000682662	3067	3068
CGWTFTSM	TGCGGCTGGACCTTCACGTCCATG	Pool 13	4626	4627	0.000500787	3064	3065	0.00016308	7228	7229	0.000117854	425584	425585	0.00688883	NA	NA	NA	NA	NA	NA	NA	NA	NA	NA	NA	NA	NA	NA	NA	12846	12847	0.000706242	13806	13807	0.000765294	NA	NA	NA	NA	NA	NA	NA	NA	NA	8037	8038	0.00024513	1561	1562
CGYQSTML	TGTGGTTACCAGAGCACGATGCTG	Pool 13	146	147	1.591e-05	50	51	2.71357e-06	12	13	2.11937e-07	NA	1	1.61867e-08	NA	NA	NA	NA	NA	NA	NA	NA	NA	NA	NA	NA	NA	NA	NA	262	263	1.4458e-05	316	317	1.75707e-05	NA	NA	NA	NA	NA	NA	NA	NA	NA	91	92	2.80567e-06	NA	1
CGYSRAEV	TGTGGATACAGCCGGGCTGAGGTT	Pool 13	15	16	1.7317e-06	2	3	1.59622e-07	NA	1	1.63029e-08	NA	1	1.61867e-08	NA	NA	NA	NA	NA	NA	NA	NA	NA	NA	NA	NA	NA	NA	NA	16	17	9.34546e-07	NA	1	5.5428e-08	NA	NA	NA	NA	NA	NA	NA	NA	NA	NA	1	3.04964e-08	1	2
CGYTCSPL	TGCGGGTACACGTGTTCACCATTA	Pool 13	482	483	5.22758e-05	98	99	5.26751e-06	NA	1	1.63029e-08	84	85	1.37587e-06	NA	NA	NA	NA	NA	NA	NA	NA	NA	NA	NA	NA	NA	NA	NA	1398	1399	7.69077e-05	738	739	4.09613e-05	NA	NA	NA	NA	NA	NA	NA	NA	NA	14	15	4.57446e-07	18	19
CGYTSVLL	TGTGGCTACACATCTGTCTTGCTT	Pool 13	194	195	2.11051e-05	262	263	1.39935e-05	4	5	8.15144e-08	76	77	1.24638e-06	NA	NA	NA	NA	NA	NA	NA	NA	NA	NA	NA	NA	NA	NA	NA	508	509	2.79814e-05	304	305	1.69055e-05	NA	NA	NA	NA	NA	NA	NA	NA	NA	4	5	1.52482e-07	114	115
CIAEFLSL	TGCATCGCAGAATTTCTCAGCTTA	Pool 13	307	308	3.33353e-05	24	25	1.33018e-06	4	5	8.15144e-08	120	121	1.95859e-06	NA	NA	NA	NA	NA	NA	NA	NA	NA	NA	NA	NA	NA	NA	NA	726	727	3.99656e-05	342	343	1.90118e-05	NA	NA	NA	NA	NA	NA	NA	NA	NA	4	5	1.52482e-07	59	60
CIFLFSFI	TGTATATTCCTGTTCAGTTTTATC	Pool 13	3861	3862	0.00041799	18028	18029	0.000959272	36392	36393	0.000593311	62662	62663	0.00101431	NA	NA	NA	NA	NA	NA	NA	NA	NA	NA	NA	NA	NA	NA	NA	8026	8027	0.000441271	6800	6801	0.000376966	NA	NA	NA	NA	NA	NA	NA	NA	NA	74734	74735	0.00227915	11795	11796
CIFLGTLL	TGCATTTTCTTAGGGACCCTGTTA	Pool 13	3549	3550	0.000384222	13770	13771	0.000732716	678	679	1.10697e-05	2472	2473	4.00298e-05	NA	NA	NA	NA	NA	NA	NA	NA	NA	NA	NA	NA	NA	NA	NA	12266	12267	0.000674358	8312	8313	0.000460773	NA	NA	NA	NA	NA	NA	NA	NA	NA	488	489	1.49127e-05	623	624
CLFNFLLL	TGTTTGTTTAACTTCCTCTTATTG	Pool 13	1355	1356	0.000146762	348	349	1.85693e-05	162	163	2.65737e-06	256	257	4.15999e-06	NA	NA	NA	NA	NA	NA	NA	NA	NA	NA	NA	NA	NA	NA	NA	5714	5715	0.000314172	4422	4423	0.000245158	NA	NA	NA	NA	NA	NA	NA	NA	NA	173	174	5.30637e-06	534	535
CLLAYSGL	TGCCTCTTGGCATATTCAGGACTG	Pool 13	6	7	7.5762e-07	NA	1	5.32072e-08	NA	1	1.63029e-08	NA	1	1.61867e-08	NA	NA	NA	NA	NA	NA	NA	NA	NA	NA	NA	NA	NA	NA	NA	6	7	3.84813e-07	NA	1	5.5428e-08	NA	NA	NA	NA	NA	NA	NA	NA	NA	1	2	6.09928e-08	9	10
CLRVYAGL	TGTCTTCGAGTCTACGCCGGACTC	Pool 13	284	285	3.0846e-05	16	17	9.04522e-07	68	69	1.1249e-06	26	27	4.37042e-07	NA	NA	NA	NA	NA	NA	NA	NA	NA	NA	NA	NA	NA	NA	NA	642	643	3.53478e-05	480	481	2.66608e-05	NA	NA	NA	NA	NA	NA	NA	NA	NA	124	125	3.81205e-06	15	16
CLYIHMFL	TGCCTGTATATTCACATGTTTCTT	Pool 13	1208	1209	0.000130852	880	881	4.68755e-05	322	323	5.26583e-06	318	319	5.16357e-06	NA	NA	NA	NA	NA	NA	NA	NA	NA	NA	NA	NA	NA	NA	NA	4996	4997	0.000274702	2736	2737	0.000151706	NA	NA	NA	NA	NA	NA	NA	NA	NA	353	354	1.07957e-05	1041	1042
CMITFQFI	TGCATGATTACCTTTCAGTTTATA	Pool 13	2034	2035	0.000220251	1084	1085	5.77298e-05	342	343	5.59189e-06	610	611	9.89009e-06	NA	NA	NA	NA	NA	NA	NA	NA	NA	NA	NA	NA	NA	NA	NA	4350	4351	0.000239189	5062	5063	0.000280632	NA	NA	NA	NA	NA	NA	NA	NA	NA	653	654	1.99446e-05	1961	1962
CMLAFADM	TGCATGTTGGCGTTTGCTGACATG	Pool 13	23	24	2.59756e-06	NA	1	5.32072e-08	4	5	8.15144e-08	2	3	4.85602e-08	NA	NA	NA	NA	NA	NA	NA	NA	NA	NA	NA	NA	NA	NA	NA	54	55	3.02353e-06	22	23	1.27484e-06	NA	NA	NA	NA	NA	NA	NA	NA	NA	6	7	2.13475e-07	NA	1
CMLLASHL	TGCATGCTACTAGCTTCCCATTTG	Pool 13	1025	1026	0.000111045	796	797	4.24061e-05	124	125	2.03786e-06	1352	1353	2.19006e-05	NA	NA	NA	NA	NA	NA	NA	NA	NA	NA	NA	NA	NA	NA	NA	3116	3117	0.000171352	2602	2603	0.000144279	NA	NA	NA	NA	NA	NA	NA	NA	NA	112	113	3.44609e-06	134	135
CMWLSSPL	TGCATGTGGCTATCATCCCCACTG	Pool 13	12	13	1.40701e-06	NA	1	5.32072e-08	NA	1	1.63029e-08	4	5	8.09336e-08	NA	NA	NA	NA	NA	NA	NA	NA	NA	NA	NA	NA	NA	NA	NA	252	253	1.39082e-05	384	385	2.13398e-05	NA	NA	NA	NA	NA	NA	NA	NA	NA	2	3	9.14892e-08	6	7
CNFLFVNL	TGTAATTTTCTTTTCGTTAACCTC	Pool 13	907	908	9.82742e-05	446	447	2.37836e-05	372	373	6.08097e-06	300	301	4.8722e-06	NA	NA	NA	NA	NA	NA	NA	NA	NA	NA	NA	NA	NA	NA	NA	5794	5795	0.00031857	1780	1781	9.87172e-05	NA	NA	NA	NA	NA	NA	NA	NA	NA	146	147	4.48297e-06	762	763
CNKSFVFL	TGCAACAAATCGTTTGTCTTCTTA	Pool 13	3104	3105	0.000336059	774	775	4.12356e-05	448	449	7.31999e-06	4344	4345	7.03313e-05	NA	NA	NA	NA	NA	NA	NA	NA	NA	NA	NA	NA	NA	NA	NA	6710	6711	0.000368926	6088	6089	0.000337501	NA	NA	NA	NA	NA	NA	NA	NA	NA	783	784	2.39092e-05	35327	35328
CNMVFSSL	TGTAATATGGTATTCTCGTCCCTC	Pool 13	1288	1289	0.00013951	285604	285605	0.0151962	15666	15667	0.000255417	294078	294079	0.00476018	NA	NA	NA	NA	NA	NA	NA	NA	NA	NA	NA	NA	NA	NA	NA	3902	3903	0.000214561	2660	2661	0.000147494	NA	NA	NA	NA	NA	NA	NA	NA	NA	25612	25613	0.000781104	14237	14238
CNPLFAAL	TGTAATCCGCTATTTGCCGCCTTG	Pool 13	412	413	4.46996e-05	294	295	1.56961e-05	102	103	1.6792e-06	6	7	1.13307e-07	NA	NA	NA	NA	NA	NA	NA	NA	NA	NA	NA	NA	NA	NA	NA	1456	1457	8.00961e-05	808	809	4.48412e-05	NA	NA	NA	NA	NA	NA	NA	NA	NA	87	88	2.68368e-06	92	93
CNYIFTVI	TGCAATTACATCTTCACTGTTATA	Pool 13	141	142	1.53689e-05	708	709	3.77239e-05	150	151	2.46174e-06	132	133	2.15283e-06	NA	NA	NA	NA	NA	NA	NA	NA	NA	NA	NA	NA	NA	NA	NA	620	621	3.41384e-05	590	591	3.27579e-05	NA	NA	NA	NA	NA	NA	NA	NA	NA	53	54	1.64681e-06	63	64
CQFYVDNL	TGCCAATTTTACGTTGACAACCTG	Pool 13	236	237	2.56509e-05	160	161	8.56636e-06	88	89	1.45096e-06	186	187	3.02692e-06	NA	NA	NA	NA	NA	NA	NA	NA	NA	NA	NA	NA	NA	NA	NA	882	883	4.85414e-05	770	771	4.2735e-05	NA	NA	NA	NA	NA	NA	NA	NA	NA	7	8	2.43971e-07	31	32
CQSIYAYL	TGTCAGTCGATTTACGCGTATCTT	Pool 13	330	331	3.58246e-05	338	339	1.80372e-05	352	353	5.75492e-06	130	131	2.12046e-06	NA	NA	NA	NA	NA	NA	NA	NA	NA	NA	NA	NA	NA	NA	NA	1058	1059	5.82167e-05	1090	1091	6.04719e-05	NA	NA	NA	NA	NA	NA	NA	NA	NA	2	3	9.14892e-08	383	384
CRYYYPNV	TGTAGGTACTACTATCCGAATGTC	Pool 13	2315	2316	0.000250664	1368	1369	7.28406e-05	436	437	7.12436e-06	8120	8121	0.000131452	NA	NA	NA	NA	NA	NA	NA	NA	NA	NA	NA	NA	NA	NA	NA	3742	3743	0.000205765	2914	2915	0.000161572	NA	NA	NA	NA	NA	NA	NA	NA	NA	2678	2679	8.16998e-05	2784	2785
CSFFIQAV	TGTTCCTTCTTCATTCAAGCTGTC	Pool 13	9655	9656	0.00104508	2766	2767	0.000147224	784	785	1.27978e-05	3164	3165	5.1231e-05	NA	NA	NA	NA	NA	NA	NA	NA	NA	NA	NA	NA	NA	NA	NA	3818	3819	0.000209943	4522	4523	0.000250701	NA	NA	NA	NA	NA	NA	NA	NA	NA	3512	3513	0.000107134	1520	1521
CSFQIYSV	TGTAGTTTCCAAATTTACTCGGTA	Pool 13	2013	2014	0.000217978	1232	1233	6.56045e-05	160	161	2.62476e-06	1238	1239	2.00554e-05	NA	NA	NA	NA	NA	NA	NA	NA	NA	NA	NA	NA	NA	NA	NA	3330	3331	0.000183116	3846	3847	0.000213231	NA	NA	NA	NA	NA	NA	NA	NA	NA	261	262	7.99005e-06	268	269
CSHAFHLL	TGTTCGCATGCCTTTCATCTGTTG	Pool 13	1684	1685	0.00018237	4292	4293	0.000228418	1432	1433	2.3362e-05	5314	5315	8.60325e-05	NA	NA	NA	NA	NA	NA	NA	NA	NA	NA	NA	NA	NA	NA	NA	6406	6407	0.000352214	4044	4045	0.000224206	NA	NA	NA	NA	NA	NA	NA	NA	NA	1033	1034	3.15333e-05	2052	2053
CSILFPLI	TGCAGTATATTATTCCCTTTAATC	Pool 13	849	850	9.19967e-05	1012	1013	5.38989e-05	682	683	1.11349e-05	114	115	1.86147e-06	NA	NA	NA	NA	NA	NA	NA	NA	NA	NA	NA	NA	NA	NA	NA	2622	2623	0.000144195	3426	3427	0.000189952	NA	NA	NA	NA	NA	NA	NA	NA	NA	731	732	2.23234e-05	795	796
CSITFTSL	TGCTCGATAACATTCACATCCCTT	Pool 13	2918	2919	0.000315928	324	325	1.72923e-05	564	565	9.21113e-06	418	419	6.78224e-06	NA	NA	NA	NA	NA	NA	NA	NA	NA	NA	NA	NA	NA	NA	NA	1664	1665	9.15305e-05	1352	1353	7.4994e-05	NA	NA	NA	NA	NA	NA	NA	NA	NA	141	142	4.33049e-06	139	140
CSLAVTNL	TGTTCACTGGCAGTAACTAACCTT	Pool 13	18	19	2.0564e-06	8	9	4.78865e-07	NA	1	1.63029e-08	8	9	1.45681e-07	NA	NA	NA	NA	NA	NA	NA	NA	NA	NA	NA	NA	NA	NA	NA	122	123	6.76172e-06	6	7	3.87996e-07	NA	NA	NA	NA	NA	NA	NA	NA	NA	NA	1	3.04964e-08	NA	1
CSLFASAL	TGCTCTTTATTCGCGTCGGCCTTG	Pool 13	23	24	2.59756e-06	NA	1	5.32072e-08	4	5	8.15144e-08	6	7	1.13307e-07	NA	NA	NA	NA	NA	NA	NA	NA	NA	NA	NA	NA	NA	NA	NA	30	31	1.70417e-06	4	5	2.7714e-07	NA	NA	NA	NA	NA	NA	NA	NA	NA	2	3	9.14892e-08	2	3
CSLFMRNI	TGCTCGCTGTTTATGCGCAACATA	Pool 13	806	807	8.73428e-05	194	195	1.03754e-05	96	97	1.58138e-06	140	141	2.28233e-06	NA	NA	NA	NA	NA	NA	NA	NA	NA	NA	NA	NA	NA	NA	NA	8912	8913	0.000489977	2958	2959	0.000164011	NA	NA	NA	NA	NA	NA	NA	NA	NA	219	220	6.70921e-06	117	118
CSLLFAVL	TGCTCTTTATTGTTTGCGGTCTTG	Pool 13	2917	2918	0.000315819	9240	9241	0.000491688	5254	5255	8.56716e-05	28296	28297	0.000458036	NA	NA	NA	NA	NA	NA	NA	NA	NA	NA	NA	NA	NA	NA	NA	7740	7741	0.000425548	9350	9351	0.000518307	NA	NA	NA	NA	NA	NA	NA	NA	NA	38832	38833	0.00118427	3479	3480
CSMTFEQL	TGCTCCATGACCTTTGAGCAGTTA	Pool 13	6457	6458	0.000698959	9834	9835	0.000523293	6016	6017	9.80944e-05	2992	2993	4.84469e-05	NA	NA	NA	NA	NA	NA	NA	NA	NA	NA	NA	NA	NA	NA	NA	18478	18479	0.00101585	15978	15979	0.000885683	NA	NA	NA	NA	NA	NA	NA	NA	NA	1674	1675	5.10815e-05	4683	4684
CSNFFGSF	TGCTCCAATTTCTTTGGCTCATTT	Pool 13	479	480	5.19511e-05	1638	1639	8.72066e-05	276	277	4.5159e-06	774	775	1.25447e-05	NA	NA	NA	NA	NA	NA	NA	NA	NA	NA	NA	NA	NA	NA	NA	4208	4209	0.000231383	1130	1131	6.2689e-05	NA	NA	NA	NA	NA	NA	NA	NA	NA	66	67	2.04326e-06	132	133
CSPMYYFL	TGTTCCCCAATGTATTACTTCCTT	Pool 13	9390	9391	0.0010164	9194	9195	0.00048924	28600	28601	0.000466279	1379276	1379277	0.022326	NA	NA	NA	NA	NA	NA	NA	NA	NA	NA	NA	NA	NA	NA	NA	9282	9283	0.000510317	6844	6845	0.000379404	NA	NA	NA	NA	NA	NA	NA	NA	NA	32181	32182	0.000981435	10419	10420
CSPRWSAL	TGTTCCCCGAGATGGTCCGCATTA	Pool 13	812	813	8.79922e-05	2762	2763	0.000147011	144	145	2.36392e-06	1366	1367	2.21273e-05	NA	NA	NA	NA	NA	NA	NA	NA	NA	NA	NA	NA	NA	NA	NA	2022	2023	0.000111211	506	507	2.8102e-05	NA	NA	NA	NA	NA	NA	NA	NA	NA	245	246	7.50211e-06	477	478
CSRSFHNL	TGTTCTCGTTCGTTCCATAACCTA	Pool 13	59	60	6.49389e-06	48	49	2.60715e-06	98	99	1.61399e-06	26	27	4.37042e-07	NA	NA	NA	NA	NA	NA	NA	NA	NA	NA	NA	NA	NA	NA	NA	392	393	2.16045e-05	346	347	1.92335e-05	NA	NA	NA	NA	NA	NA	NA	NA	NA	249	250	7.6241e-06	6	7
CSTFRLSL	TGTTCCACGTTCAGGTTGTCACTC	Pool 13	56	57	6.16919e-06	2	3	1.59622e-07	16	17	2.77149e-07	10	11	1.78054e-07	NA	NA	NA	NA	NA	NA	NA	NA	NA	NA	NA	NA	NA	NA	NA	116	117	6.43188e-06	16	17	9.42275e-07	NA	NA	NA	NA	NA	NA	NA	NA	NA	4	5	1.52482e-07	10	11
CSWTLATV	TGTAGTTGGACGCTCGCAACTGTC	Pool 13	280	281	3.0413e-05	64	65	3.45847e-06	NA	1	1.63029e-08	42	43	6.96029e-07	NA	NA	NA	NA	NA	NA	NA	NA	NA	NA	NA	NA	NA	NA	NA	674	675	3.7107e-05	442	443	2.45546e-05	NA	NA	NA	NA	NA	NA	NA	NA	NA	2	3	9.14892e-08	68	69
CSYFLGLL	TGCAGTTATTTTCTTGGCCTATTA	Pool 13	2263	2264	0.000245036	3202	3203	0.000170423	1310	1311	2.13731e-05	1268	1269	2.0541e-05	NA	NA	NA	NA	NA	NA	NA	NA	NA	NA	NA	NA	NA	NA	NA	5504	5505	0.000302628	6502	6503	0.000360448	NA	NA	NA	NA	NA	NA	NA	NA	NA	1705	1706	5.20268e-05	844	845
CSYKLVTV	TGTTCCTATAAACTCGTCACGGTA	Pool 13	14	15	1.62347e-06	2	3	1.59622e-07	NA	1	1.63029e-08	NA	1	1.61867e-08	NA	NA	NA	NA	NA	NA	NA	NA	NA	NA	NA	NA	NA	NA	NA	6	7	3.84813e-07	NA	1	5.5428e-08	NA	NA	NA	NA	NA	NA	NA	NA	NA	NA	1	3.04964e-08	NA	1
CSYKNGVL	TGTTCATACAAGAACGGCGTTCTG	Pool 13	12	13	1.40701e-06	136	137	7.28939e-06	4	5	8.15144e-08	NA	1	1.61867e-08	NA	NA	NA	NA	NA	NA	NA	NA	NA	NA	NA	NA	NA	NA	NA	30	31	1.70417e-06	10	11	6.09707e-07	NA	NA	NA	NA	NA	NA	NA	NA	NA	8	9	2.74468e-07	NA	1
CSYLGKEL	TGTTCCTACCTGGGCAAAGAGCTC	Pool 13	175	176	1.90487e-05	308	309	1.6441e-05	4	5	8.15144e-08	4	5	8.09336e-08	NA	NA	NA	NA	NA	NA	NA	NA	NA	NA	NA	NA	NA	NA	NA	350	351	1.92956e-05	496	497	2.75477e-05	NA	NA	NA	NA	NA	NA	NA	NA	NA	2	3	9.14892e-08	2	3
CSYRLLSV	TGCAGTTATAGGCTTCTGTCCGTC	Pool 13	1868	1869	0.000202285	202	203	1.08011e-05	596	597	9.73282e-06	440	441	7.13835e-06	NA	NA	NA	NA	NA	NA	NA	NA	NA	NA	NA	NA	NA	NA	NA	2196	2197	0.000120776	1822	1823	0.000101045	NA	NA	NA	NA	NA	NA	NA	NA	NA	452	453	1.38149e-05	368	369
CSYVRMVF	TGCTCTTATGTCCGTATGGTATTC	Pool 13	420	421	4.55654e-05	384	385	2.04848e-05	34	35	5.70601e-07	380	381	6.16714e-06	NA	NA	NA	NA	NA	NA	NA	NA	NA	NA	NA	NA	NA	NA	NA	1704	1705	9.37295e-05	2596	2597	0.000143946	NA	NA	NA	NA	NA	NA	NA	NA	NA	409	410	1.25035e-05	360	361
CTAIFYTL	TGTACCGCGATCTTCTATACGCTC	Pool 13	1427	1428	0.000154555	3060	3061	0.000162867	2674	2675	4.36102e-05	476	477	7.72107e-06	NA	NA	NA	NA	NA	NA	NA	NA	NA	NA	NA	NA	NA	NA	NA	4216	4217	0.000231822	2500	2501	0.000138625	NA	NA	NA	NA	NA	NA	NA	NA	NA	6516	6517	0.000198745	983	984
CTFMLTQM	TGTACATTTATGCTCACTCAAATG	Pool 13	51	52	5.62804e-06	NA	1	5.32072e-08	20	21	3.42361e-07	12	13	2.10427e-07	NA	NA	NA	NA	NA	NA	NA	NA	NA	NA	NA	NA	NA	NA	NA	60	61	3.35337e-06	226	227	1.25821e-05	NA	NA	NA	NA	NA	NA	NA	NA	NA	4	5	1.52482e-07	1	2
CTFVLSYL	TGTACGTTTGTTCTTTCCTATTTA	Pool 13	737	738	7.98748e-05	1608	1609	8.56104e-05	166	167	2.72258e-06	30	31	5.01789e-07	NA	NA	NA	NA	NA	NA	NA	NA	NA	NA	NA	NA	NA	NA	NA	3098	3099	0.000170362	2640	2641	0.000146385	NA	NA	NA	NA	NA	NA	NA	NA	NA	114	115	3.50708e-06	187	188
CTLKYSIL	TGTACCCTAAAATACAGTATCTTA	Pool 13	196	197	2.13216e-05	50	51	2.71357e-06	NA	1	1.63029e-08	NA	1	1.61867e-08	NA	NA	NA	NA	NA	NA	NA	NA	NA	NA	NA	NA	NA	NA	NA	616	617	3.39185e-05	638	639	3.54185e-05	NA	NA	NA	NA	NA	NA	NA	NA	NA	195	196	5.97729e-06	58	59
CTMYIISL	TGTACCATGTATATAATCTCCCTC	Pool 13	2536	2537	0.000274583	3858	3859	0.000205327	306	307	5.00498e-06	684	685	1.10879e-05	NA	NA	NA	NA	NA	NA	NA	NA	NA	NA	NA	NA	NA	NA	NA	2300	2301	0.000126494	2960	2961	0.000164122	NA	NA	NA	NA	NA	NA	NA	NA	NA	258	259	7.89857e-06	1857	1858
CTRIFAGI	TGTACGCGGATATTCGCTGGGATC	Pool 13	486	487	5.27087e-05	68	69	3.6713e-06	118	119	1.94004e-06	22	23	3.72295e-07	NA	NA	NA	NA	NA	NA	NA	NA	NA	NA	NA	NA	NA	NA	NA	1292	1293	7.10805e-05	1358	1359	7.53266e-05	NA	NA	NA	NA	NA	NA	NA	NA	NA	4	5	1.52482e-07	55	56
CTWFQADL	TGCACTTGGTTCCAAGCCGATCTC	Pool 13	80	81	8.76675e-06	NA	1	5.32072e-08	20	21	3.42361e-07	NA	1	1.61867e-08	NA	NA	NA	NA	NA	NA	NA	NA	NA	NA	NA	NA	NA	NA	NA	212	213	1.17093e-05	292	293	1.62404e-05	NA	NA	NA	NA	NA	NA	NA	NA	NA	7	8	2.43971e-07	4	5
CTYCRRHF	TGTACTTATTGCAGGAGACACTTC	Pool 13	1096	1097	0.00011873	236	237	1.26101e-05	106	107	1.74441e-06	318	319	5.16357e-06	NA	NA	NA	NA	NA	NA	NA	NA	NA	NA	NA	NA	NA	NA	NA	4140	4141	0.000227644	1746	1747	9.68326e-05	NA	NA	NA	NA	NA	NA	NA	NA	NA	87	88	2.68368e-06	97	98
CTYDYLFV	TGTACATATGATTATTTGTTTGTA	Pool 13	314	315	3.40929e-05	60	61	3.24564e-06	376	377	6.14619e-06	790	791	1.28037e-05	NA	NA	NA	NA	NA	NA	NA	NA	NA	NA	NA	NA	NA	NA	NA	900	901	4.95309e-05	1448	1449	8.03151e-05	NA	NA	NA	NA	NA	NA	NA	NA	NA	61	62	1.89078e-06	68	69
CTYKVTGL	TGTACTTATAAAGTCACAGGTCTC	Pool 13	617	618	6.6887e-05	322	323	1.71859e-05	324	325	5.29844e-06	204	205	3.31828e-06	NA	NA	NA	NA	NA	NA	NA	NA	NA	NA	NA	NA	NA	NA	NA	1840	1841	0.000101206	3838	3839	0.000212788	NA	NA	NA	NA	NA	NA	NA	NA	NA	68	69	2.10425e-06	156	157
CVFFYGLV	TGTGTATTCTTCTATGGGCTGGTG	Pool 13	304	305	3.30106e-05	68	69	3.6713e-06	NA	1	1.63029e-08	NA	1	1.61867e-08	NA	NA	NA	NA	NA	NA	NA	NA	NA	NA	NA	NA	NA	NA	NA	708	709	3.89761e-05	1074	1075	5.95851e-05	NA	NA	NA	NA	NA	NA	NA	NA	NA	75	76	2.31773e-06	34	35
CVLAFTGV	TGCGTGCTAGCATTTACGGGCGTG	Pool 13	2235	2236	0.000242006	1772	1773	9.43363e-05	922	923	1.50476e-05	380	381	6.16714e-06	NA	NA	NA	NA	NA	NA	NA	NA	NA	NA	NA	NA	NA	NA	NA	6322	6323	0.000347596	2966	2967	0.000164455	NA	NA	NA	NA	NA	NA	NA	NA	NA	216	217	6.61772e-06	1351	1352
CVLTFLGL	TGTGTTTTGACATTCTTAGGTCTT	Pool 13	1770	1771	0.000191678	1012	1013	5.38989e-05	144	145	2.36392e-06	1054	1055	1.7077e-05	NA	NA	NA	NA	NA	NA	NA	NA	NA	NA	NA	NA	NA	NA	NA	5932	5933	0.000326157	5904	5905	0.000327302	NA	NA	NA	NA	NA	NA	NA	NA	NA	158	159	4.84893e-06	1186	1187
CVPPYISM	TGCGTCCCACCGTATATAAGCATG	Pool 13	110	111	1.20137e-05	78	79	4.20337e-06	2	3	4.89086e-08	34	35	5.66535e-07	NA	NA	NA	NA	NA	NA	NA	NA	NA	NA	NA	NA	NA	NA	NA	264	265	1.45679e-05	410	411	2.27809e-05	NA	NA	NA	NA	NA	NA	NA	NA	NA	310	311	9.48438e-06	33	34
CVTPFLTL	TGCGTAACTCCCTTTCTTACACTA	Pool 13	2951	2952	0.000319499	3668	3669	0.000195217	5456	5457	8.89648e-05	20844	20845	0.000337412	NA	NA	NA	NA	NA	NA	NA	NA	NA	NA	NA	NA	NA	NA	NA	9344	9345	0.000513726	7236	7237	0.000401132	NA	NA	NA	NA	NA	NA	NA	NA	NA	1697	1698	5.17829e-05	6438	6439
CVYAYLIL	TGTGTGTACGCATATCTCATCCTC	Pool 13	305	306	3.31188e-05	156	157	8.35353e-06	810	811	1.32216e-05	2	3	4.85602e-08	NA	NA	NA	NA	NA	NA	NA	NA	NA	NA	NA	NA	NA	NA	NA	684	685	3.76567e-05	1498	1499	8.30865e-05	NA	NA	NA	NA	NA	NA	NA	NA	NA	9	10	3.04964e-07	NA	1
CVYCLAEV	TGTGTTTACTGCCTTGCAGAAGTT	Pool 13	1659	1660	0.000179664	176	177	9.41767e-06	76	77	1.25532e-06	68	69	1.11688e-06	NA	NA	NA	NA	NA	NA	NA	NA	NA	NA	NA	NA	NA	NA	NA	2938	2939	0.000161567	3716	3717	0.000206026	NA	NA	NA	NA	NA	NA	NA	NA	NA	35	36	1.09787e-06	651	652
CVYDLCLL	TGCGTCTATGACCTCTGCCTCTTG	Pool 13	693	694	7.51126e-05	352	353	1.87821e-05	1398	1399	2.28077e-05	474	475	7.6887e-06	NA	NA	NA	NA	NA	NA	NA	NA	NA	NA	NA	NA	NA	NA	NA	2574	2575	0.000141556	2358	2359	0.000130755	NA	NA	NA	NA	NA	NA	NA	NA	NA	1359	1360	4.14751e-05	159	160
CVYFFKNL	TGTGTATATTTCTTTAAGAATTTA	Pool 13	435	436	4.71889e-05	274	275	1.4632e-05	358	359	5.85273e-06	22	23	3.72295e-07	NA	NA	NA	NA	NA	NA	NA	NA	NA	NA	NA	NA	NA	NA	NA	1060	1061	5.83267e-05	1630	1631	9.0403e-05	NA	NA	NA	NA	NA	NA	NA	NA	NA	169	170	5.18439e-06	162	163
CVYSLLYL	TGCGTGTACTCCCTACTGTATTTA	Pool 13	1031	1032	0.000111695	192	193	1.0269e-05	110	111	1.80962e-06	414	415	6.71749e-06	NA	NA	NA	NA	NA	NA	NA	NA	NA	NA	NA	NA	NA	NA	NA	3490	3491	0.000191912	2080	2081	0.000115346	NA	NA	NA	NA	NA	NA	NA	NA	NA	365	366	1.11617e-05	1168	1169
CWLAWSPL	TGTTGGTTAGCTTGGTCACCCCTA	Pool 13	300	301	3.25777e-05	802	803	4.27254e-05	218	219	3.57033e-06	3978	3979	6.4407e-05	NA	NA	NA	NA	NA	NA	NA	NA	NA	NA	NA	NA	NA	NA	NA	1028	1029	5.65675e-05	730	731	4.05178e-05	NA	NA	NA	NA	NA	NA	NA	NA	NA	1466	1467	4.47382e-05	6843	6844
CYDAFAPL	TGTTATGACGCCTTTGCCCCTTTA	Pool 13	1108	1109	0.000120029	804	805	4.28318e-05	82	83	1.35314e-06	172	173	2.8003e-06	NA	NA	NA	NA	NA	NA	NA	NA	NA	NA	NA	NA	NA	NA	NA	2808	2809	0.00015442	2304	2305	0.000127761	NA	NA	NA	NA	NA	NA	NA	NA	NA	255	256	7.80708e-06	416	417
CYGYFRKL	TGTTATGGTTATTTCAGAAAGTTG	Pool 13	320	321	3.47423e-05	176	177	9.41767e-06	22	23	3.74966e-07	76	77	1.24638e-06	NA	NA	NA	NA	NA	NA	NA	NA	NA	NA	NA	NA	NA	NA	NA	942	943	5.18398e-05	690	691	3.83007e-05	NA	NA	NA	NA	NA	NA	NA	NA	NA	6	7	2.13475e-07	64	65
CYYLAHPL	TGTTATTATCTCGCGCACCCTCTT	Pool 13	698	699	7.56538e-05	472	473	2.5167e-05	212	213	3.47251e-06	238	239	3.86863e-06	NA	NA	NA	NA	NA	NA	NA	NA	NA	NA	NA	NA	NA	NA	NA	1810	1811	9.95567e-05	2838	2839	0.00015736	NA	NA	NA	NA	NA	NA	NA	NA	NA	136	137	4.17801e-06	594	595
DFYMFSEL	GACTTTTACATGTTCTCCGAGTTG	Pool 13	776	777	8.40959e-05	196	197	1.04818e-05	950	951	1.5504e-05	1374	1375	2.22568e-05	NA	NA	NA	NA	NA	NA	NA	NA	NA	NA	NA	NA	NA	NA	NA	2414	2415	0.000132761	1912	1913	0.000106034	NA	NA	NA	NA	NA	NA	NA	NA	NA	235	236	7.19715e-06	282	283
DIFNYQSL	GACATATTTAACTATCAGTCACTG	Pool 13	331	332	3.59328e-05	144	145	7.71504e-06	26	27	4.40178e-07	366	367	5.94053e-06	NA	NA	NA	NA	NA	NA	NA	NA	NA	NA	NA	NA	NA	NA	NA	866	867	4.76619e-05	438	439	2.43329e-05	NA	NA	NA	NA	NA	NA	NA	NA	NA	30	31	9.45388e-07	212	213
DIYFTSPL	GATATTTATTTTACTTCTCCTCTC	Pool 13	11070	11071	0.00119823	6454	6455	0.000343452	2092	2093	3.41219e-05	10254	10255	0.000165995	NA	NA	NA	NA	NA	NA	NA	NA	NA	NA	NA	NA	NA	NA	NA	16448	16449	0.000904256	17566	17567	0.000973703	NA	NA	NA	NA	NA	NA	NA	NA	NA	6974	6975	0.000212712	31563	31564
DIYSFSEL	GATATCTACTCTTTCAGTGAGTTA	Pool 13	7333	7334	0.00079377	7106	7107	0.000378144	1500	1501	2.44706e-05	8672	8673	0.000140387	NA	NA	NA	NA	NA	NA	NA	NA	NA	NA	NA	NA	NA	NA	NA	16966	16967	0.000932732	14674	14675	0.000813405	NA	NA	NA	NA	NA	NA	NA	NA	NA	5716	5717	0.000174348	7971	7972
DNYCYFIL	GATAATTACTGCTACTTCATCCTC	Pool 13	328	329	3.56082e-05	210	211	1.12267e-05	44	45	7.3363e-07	80	81	1.31112e-06	NA	NA	NA	NA	NA	NA	NA	NA	NA	NA	NA	NA	NA	NA	NA	774	775	4.26043e-05	1396	1397	7.74329e-05	NA	NA	NA	NA	NA	NA	NA	NA	NA	34	35	1.06737e-06	51	52
DNYMYLII	GATAATTACATGTATCTTATAATC	Pool 13	1072	1073	0.000116132	540	541	2.87851e-05	516	517	8.42859e-06	380	381	6.16714e-06	NA	NA	NA	NA	NA	NA	NA	NA	NA	NA	NA	NA	NA	NA	NA	2642	2643	0.000145294	3498	3499	0.000193942	NA	NA	NA	NA	NA	NA	NA	NA	NA	247	248	7.56311e-06	554	555
DSFFFSLV	GATTCCTTCTTCTTCAGCCTGGTG	Pool 13	109	110	1.19055e-05	NA	1	5.32072e-08	NA	1	1.63029e-08	12	13	2.10427e-07	NA	NA	NA	NA	NA	NA	NA	NA	NA	NA	NA	NA	NA	NA	NA	338	339	1.86359e-05	214	215	1.1917e-05	NA	NA	NA	NA	NA	NA	NA	NA	NA	NA	1	3.04964e-08	2	3
DSLLYPSL	GACTCCTTGTTGTACCCAAGTCTG	Pool 13	1851	1852	0.000200445	3036	3037	0.00016159	2084	2085	3.39915e-05	3000	3001	4.85764e-05	NA	NA	NA	NA	NA	NA	NA	NA	NA	NA	NA	NA	NA	NA	NA	4818	4819	0.000264916	4676	4677	0.000259237	NA	NA	NA	NA	NA	NA	NA	NA	NA	1873	1874	5.71502e-05	2925	2926
DSLYFMYL	GATTCTTTATACTTCATGTATCTG	Pool 13	181	182	1.96981e-05	170	171	9.09843e-06	30	31	5.05389e-07	302	303	4.90458e-06	NA	NA	NA	NA	NA	NA	NA	NA	NA	NA	NA	NA	NA	NA	NA	466	467	2.56725e-05	398	399	2.21158e-05	NA	NA	NA	NA	NA	NA	NA	NA	NA	207	208	6.34325e-06	463	464
DSSFFAAL	GACAGCTCGTTCTTCGCCGCGCTG	Pool 13	170	171	1.85076e-05	20	21	1.11735e-06	NA	1	1.63029e-08	658	659	1.06671e-05	NA	NA	NA	NA	NA	NA	NA	NA	NA	NA	NA	NA	NA	NA	NA	402	403	2.21542e-05	1934	1935	0.000107253	NA	NA	NA	NA	NA	NA	NA	NA	NA	3	4	1.21986e-07	NA	1
DTFTYAKV	GATACGTTCACATACGCTAAAGTA	Pool 13	277	278	3.00883e-05	62	63	3.35205e-06	4	5	8.15144e-08	22	23	3.72295e-07	NA	NA	NA	NA	NA	NA	NA	NA	NA	NA	NA	NA	NA	NA	NA	778	779	4.28242e-05	590	591	3.27579e-05	NA	NA	NA	NA	NA	NA	NA	NA	NA	150	151	4.60496e-06	100	101
DVFAFQVL	GATGTTTTCGCTTTCCAAGTTCTT	Pool 13	1488	1489	0.000161157	946	947	5.03872e-05	552	553	9.01549e-06	1444	1445	2.33898e-05	NA	NA	NA	NA	NA	NA	NA	NA	NA	NA	NA	NA	NA	NA	NA	5584	5585	0.000307026	5404	5405	0.000299588	NA	NA	NA	NA	NA	NA	NA	NA	NA	286	287	8.75246e-06	357	358
DVWLFAPL	GACGTGTGGCTCTTTGCTCCTTTG	Pool 13	215	216	2.3378e-05	136	137	7.28939e-06	436	437	7.12436e-06	374	375	6.07002e-06	NA	NA	NA	NA	NA	NA	NA	NA	NA	NA	NA	NA	NA	NA	NA	458	459	2.52327e-05	962	963	5.33771e-05	NA	NA	NA	NA	NA	NA	NA	NA	NA	125	126	3.84255e-06	616	617
EAFDYLHL	GAGGCGTTCGACTATCTCCATCTA	Pool 13	2588	2589	0.000280211	798	799	4.25125e-05	92	93	1.51617e-06	136	137	2.21758e-06	NA	NA	NA	NA	NA	NA	NA	NA	NA	NA	NA	NA	NA	NA	NA	2334	2335	0.000128363	2820	2821	0.000156362	NA	NA	NA	NA	NA	NA	NA	NA	NA	188	189	5.76382e-06	187	188
EAFHLALL	GAAGCCTTCCACCTGGCTCTACTA	Pool 13	1306	1307	0.000141459	3380	3381	0.000179894	726	727	1.18522e-05	558	559	9.04838e-06	NA	NA	NA	NA	NA	NA	NA	NA	NA	NA	NA	NA	NA	NA	NA	3016	3017	0.000165854	3102	3103	0.000171993	NA	NA	NA	NA	NA	NA	NA	NA	NA	235	236	7.19715e-06	516	517
EAYKWYEL	GAGGCTTATAAGTGGTATGAATTG	Pool 13	622	623	6.74282e-05	1162	1163	6.188e-05	108	109	1.77701e-06	372	373	6.03765e-06	NA	NA	NA	NA	NA	NA	NA	NA	NA	NA	NA	NA	NA	NA	NA	1832	1833	0.000100766	7042	7043	0.000390379	NA	NA	NA	NA	NA	NA	NA	NA	NA	10574	10575	0.000322499	363	364
EIFMLSAL	GAAATCTTCATGCTGTCCGCGTTG	Pool 13	361	362	3.91798e-05	174	175	9.31126e-06	2	3	4.89086e-08	138	139	2.24996e-06	NA	NA	NA	NA	NA	NA	NA	NA	NA	NA	NA	NA	NA	NA	NA	1360	1361	7.48187e-05	694	695	3.85224e-05	NA	NA	NA	NA	NA	NA	NA	NA	NA	12	13	3.96453e-07	3	4
EIISFQHL	GAGATAATTAGCTTTCAACACTTG	Pool 13	1008	1009	0.000109206	222	223	1.18652e-05	284	285	4.64632e-06	4462	4463	7.22414e-05	NA	NA	NA	NA	NA	NA	NA	NA	NA	NA	NA	NA	NA	NA	NA	2554	2555	0.000140457	1110	1111	6.15805e-05	NA	NA	NA	NA	NA	NA	NA	NA	NA	659	660	2.01276e-05	107	108
EIMRFLSL	GAGATAATGCGGTTCTTAAGTCTA	Pool 13	675	676	7.31645e-05	420	421	2.24002e-05	582	583	9.50458e-06	112	113	1.8291e-06	NA	NA	NA	NA	NA	NA	NA	NA	NA	NA	NA	NA	NA	NA	NA	1898	1899	0.000104394	1220	1221	6.76775e-05	NA	NA	NA	NA	NA	NA	NA	NA	NA	213	214	6.52623e-06	617	618
EIMSYVPL	GAAATCATGAGCTATGTTCCGTTG	Pool 13	555	556	6.01767e-05	150	151	8.03429e-06	24	25	4.07572e-07	1038	1039	1.6818e-05	NA	NA	NA	NA	NA	NA	NA	NA	NA	NA	NA	NA	NA	NA	NA	1396	1397	7.67977e-05	1596	1597	8.85184e-05	NA	NA	NA	NA	NA	NA	NA	NA	NA	60	61	1.86028e-06	49	50
EIYSFGRV	GAGATATACAGTTTTGGCCGTGTT	Pool 13	352	353	3.82057e-05	464	465	2.47413e-05	1362	1363	2.22208e-05	3778	3779	6.11696e-05	NA	NA	NA	NA	NA	NA	NA	NA	NA	NA	NA	NA	NA	NA	NA	1550	1551	8.52636e-05	3606	3607	0.000199929	NA	NA	NA	NA	NA	NA	NA	NA	NA	212	213	6.49573e-06	1134	1135
EMLKFLSL	GAGATGTTAAAGTTTCTGAGCCTA	Pool 13	31	32	3.46341e-06	4	5	2.66036e-07	4	5	8.15144e-08	14	15	2.42801e-07	NA	NA	NA	NA	NA	NA	NA	NA	NA	NA	NA	NA	NA	NA	NA	52	53	2.91359e-06	NA	1	5.5428e-08	NA	NA	NA	NA	NA	NA	NA	NA	NA	5	6	1.82978e-07	10	11
ENLCFAGL	GAAAACCTATGCTTTGCAGGACTT	Pool 13	90	91	9.84906e-06	26	27	1.43659e-06	NA	1	1.63029e-08	10	11	1.78054e-07	NA	NA	NA	NA	NA	NA	NA	NA	NA	NA	NA	NA	NA	NA	NA	88	89	4.89262e-06	162	163	9.03476e-06	NA	NA	NA	NA	NA	NA	NA	NA	NA	4	5	1.52482e-07	NA	1
EQFLYHLL	GAGCAATTCCTGTACCATTTACTC	Pool 13	2914	2915	0.000315495	1268	1269	6.75199e-05	1646	1647	2.68508e-05	7598	7599	0.000123003	NA	NA	NA	NA	NA	NA	NA	NA	NA	NA	NA	NA	NA	NA	NA	11438	11439	0.00062884	10158	10159	0.000563093	NA	NA	NA	NA	NA	NA	NA	NA	NA	554	555	1.69255e-05	1478	1479
ESFMLASM	GAGTCGTTCATGCTGGCCTCAATG	Pool 13	NA	1	1.08231e-07	NA	1	5.32072e-08	NA	1	1.63029e-08	NA	1	1.61867e-08	NA	NA	NA	NA	NA	NA	NA	NA	NA	NA	NA	NA	NA	NA	NA	NA	1	5.49733e-08	NA	1	5.5428e-08	NA	NA	NA	NA	NA	NA	NA	NA	NA	NA	1	3.04964e-08	NA	1
ESLRFLHV	GAGAGCTTGCGCTTTCTCCATGTG	Pool 13	220	221	2.39192e-05	220	221	1.17588e-05	104	105	1.7118e-06	1412	1413	2.28718e-05	NA	NA	NA	NA	NA	NA	NA	NA	NA	NA	NA	NA	NA	NA	NA	602	603	3.31489e-05	730	731	4.05178e-05	NA	NA	NA	NA	NA	NA	NA	NA	NA	41	42	1.28085e-06	153	154
ESMSYQKL	GAGAGCATGAGCTATCAGAAACTT	Pool 13	9	10	1.08231e-06	NA	1	5.32072e-08	4	5	8.15144e-08	NA	1	1.61867e-08	NA	NA	NA	NA	NA	NA	NA	NA	NA	NA	NA	NA	NA	NA	NA	32	33	1.81412e-06	2	3	1.66284e-07	NA	NA	NA	NA	NA	NA	NA	NA	NA	2	3	9.14892e-08	NA	1
ESRIFTFL	GAGTCTCGGATCTTTACCTTTCTT	Pool 13	2249	2250	0.000243521	980	981	5.21963e-05	878	879	1.43302e-05	346	347	5.61679e-06	NA	NA	NA	NA	NA	NA	NA	NA	NA	NA	NA	NA	NA	NA	NA	4976	4977	0.000273602	6240	6241	0.000345926	NA	NA	NA	NA	NA	NA	NA	NA	NA	116	117	3.56808e-06	582	583
ESYFNSSL	GAGTCCTACTTTAATTCGAGCTTA	Pool 13	1392	1393	0.000150766	192	193	1.0269e-05	508	509	8.29817e-06	8684	8685	0.000140582	NA	NA	NA	NA	NA	NA	NA	NA	NA	NA	NA	NA	NA	NA	NA	2464	2465	0.000135509	1356	1357	7.52157e-05	NA	NA	NA	NA	NA	NA	NA	NA	NA	418	419	1.2778e-05	792	793
ETFDYSQL	GAAACCTTTGACTATTCACAACTT	Pool 13	909	910	9.84906e-05	2552	2553	0.000135838	1158	1159	1.8895e-05	1110	1111	1.79835e-05	NA	NA	NA	NA	NA	NA	NA	NA	NA	NA	NA	NA	NA	NA	NA	9334	9335	0.000513176	1724	1725	9.56132e-05	NA	NA	NA	NA	NA	NA	NA	NA	NA	5682	5683	0.000173311	591	592
ETFEHMPL	GAAACATTCGAGCACATGCCACTC	Pool 13	6	7	7.5762e-07	NA	1	5.32072e-08	10	11	1.79332e-07	88	89	1.44062e-06	NA	NA	NA	NA	NA	NA	NA	NA	NA	NA	NA	NA	NA	NA	NA	32	33	1.81412e-06	NA	1	5.5428e-08	NA	NA	NA	NA	NA	NA	NA	NA	NA	NA	1	3.04964e-08	1	2
ETFNFCHL	GAGACGTTCAACTTCTGTCATTTG	Pool 13	112	113	1.22302e-05	4	5	2.66036e-07	298	299	4.87456e-06	400	401	6.49088e-06	NA	NA	NA	NA	NA	NA	NA	NA	NA	NA	NA	NA	NA	NA	NA	372	373	2.0505e-05	230	231	1.28039e-05	NA	NA	NA	NA	NA	NA	NA	NA	NA	9	10	3.04964e-07	111	112
ETFNLHYL	GAAACATTTAATCTGCATTACCTG	Pool 13	2627	2628	0.000284432	1930	1931	0.000102743	1832	1833	2.98832e-05	6982	6983	0.000113032	NA	NA	NA	NA	NA	NA	NA	NA	NA	NA	NA	NA	NA	NA	NA	8672	8673	0.000476783	9560	9561	0.000529947	NA	NA	NA	NA	NA	NA	NA	NA	NA	2406	2407	7.34048e-05	4398	4399
EVFNFLLV	GAGGTTTTCAATTTCCTCCTAGTC	Pool 13	10679	10680	0.00115591	21866	21867	0.00116348	17416	17417	0.000283947	3193190	3193191	0.0516873	NA	NA	NA	NA	NA	NA	NA	NA	NA	NA	NA	NA	NA	NA	NA	11784	11785	0.00064786	15604	15605	0.000864953	NA	NA	NA	NA	NA	NA	NA	NA	NA	160920	160921	0.00490751	14838	14839
EVFPFSSV	GAAGTCTTTCCGTTCAGTTCTGTC	Pool 13	3522	3523	0.000381299	10994	10995	0.000585013	11324	11325	0.00018463	6150	6151	9.95646e-05	NA	NA	NA	NA	NA	NA	NA	NA	NA	NA	NA	NA	NA	NA	NA	11434	11435	0.00062862	6880	6881	0.0003814	NA	NA	NA	NA	NA	NA	NA	NA	NA	12613	12614	0.000384681	14409	14410
EVYLFSHI	GAGGTGTACCTGTTTTCCCATATT	Pool 13	726	727	7.86843e-05	114	115	6.11883e-06	526	527	8.59162e-06	134	135	2.18521e-06	NA	NA	NA	NA	NA	NA	NA	NA	NA	NA	NA	NA	NA	NA	NA	2030	2031	0.000111651	5160	5161	0.000286064	NA	NA	NA	NA	NA	NA	NA	NA	NA	80	81	2.47021e-06	27	28
FAAAHSNL	TTCGCCGCTGCTCACAGTAATCTC	Pool 13	172	173	1.8724e-05	56	57	3.03281e-06	NA	1	1.63029e-08	NA	1	1.61867e-08	NA	NA	NA	NA	NA	NA	NA	NA	NA	NA	NA	NA	NA	NA	NA	462	463	2.54526e-05	392	393	2.17832e-05	NA	NA	NA	NA	NA	NA	NA	NA	NA	21	22	6.70921e-07	65	66
FAFCASHV	TTCGCCTTTTGTGCGAGCCATGTT	Pool 13	1119	1120	0.000121219	44	45	2.39432e-06	484	485	7.9069e-06	2	3	4.85602e-08	NA	NA	NA	NA	NA	NA	NA	NA	NA	NA	NA	NA	NA	NA	NA	766	767	4.21645e-05	406	407	2.25592e-05	NA	NA	NA	NA	NA	NA	NA	NA	NA	4	5	1.52482e-07	72	73
FAFLVSSL	TTCGCCTTCTTAGTGAGCTCGCTA	Pool 13	1178	1179	0.000127605	2308	2309	0.000122855	1108	1109	1.80799e-05	918	919	1.48756e-05	NA	NA	NA	NA	NA	NA	NA	NA	NA	NA	NA	NA	NA	NA	NA	3472	3473	0.000190922	9196	9197	0.000509771	NA	NA	NA	NA	NA	NA	NA	NA	NA	642	643	1.96092e-05	781	782
FAFNVTHL	TTCGCTTTTAATGTCACTCATTTA	Pool 13	626	627	6.78611e-05	254	255	1.35678e-05	24	25	4.07572e-07	228	229	3.70676e-06	NA	NA	NA	NA	NA	NA	NA	NA	NA	NA	NA	NA	NA	NA	NA	2598	2599	0.000142876	1366	1367	7.577e-05	NA	NA	NA	NA	NA	NA	NA	NA	NA	39	40	1.21986e-06	392	393
FAFQYNPS	TTCGCTTTTCAGTACAATCCTAGC	Pool 13	1128	1129	0.000122193	3610	3611	0.000192131	48	49	7.98841e-07	192	193	3.12404e-06	NA	NA	NA	NA	NA	NA	NA	NA	NA	NA	NA	NA	NA	NA	NA	1416	1417	7.78972e-05	968	969	5.37097e-05	NA	NA	NA	NA	NA	NA	NA	NA	NA	53	54	1.64681e-06	94	95
FAFVEFEL	TTCGCATTCGTCGAATTTGAGTTG	Pool 13	81	82	8.87498e-06	620	621	3.30417e-05	360	361	5.88534e-06	1732	1733	2.80516e-05	NA	NA	NA	NA	NA	NA	NA	NA	NA	NA	NA	NA	NA	NA	NA	428	429	2.35835e-05	288	289	1.60187e-05	NA	NA	NA	NA	NA	NA	NA	NA	NA	10118	10119	0.000308593	268	269
FAFVHVSF	TTTGCCTTTGTTCATGTCTCTTTT	Pool 13	2848	2849	0.000308351	2212	2213	0.000117748	3718	3719	6.06304e-05	9106	9107	0.000147413	NA	NA	NA	NA	NA	NA	NA	NA	NA	NA	NA	NA	NA	NA	NA	6066	6067	0.000333523	5630	5631	0.000312115	NA	NA	NA	NA	NA	NA	NA	NA	NA	3219	3220	9.81984e-05	1384	1385
FAFVTGNL	TTTGCATTTGTAACAGGTAATCTA	Pool 13	2119	2120	0.000229451	1190	1191	6.33698e-05	758	759	1.23739e-05	576	577	9.33974e-06	NA	NA	NA	NA	NA	NA	NA	NA	NA	NA	NA	NA	NA	NA	NA	3896	3897	0.000214231	13026	13027	0.00072206	NA	NA	NA	NA	NA	NA	NA	NA	NA	156	157	4.78793e-06	144	145
FAIIFFLM	TTTGCTATAATTTTCTTTCTAATG	Pool 13	2232	2233	0.000241681	830	831	4.42152e-05	220	221	3.60294e-06	370	371	6.00528e-06	NA	NA	NA	NA	NA	NA	NA	NA	NA	NA	NA	NA	NA	NA	NA	3190	3191	0.00017542	2710	2711	0.000150265	NA	NA	NA	NA	NA	NA	NA	NA	NA	855	856	2.61049e-05	800	801
FALFLGNL	TTTGCACTTTTCCTTGGGAATCTG	Pool 13	304	305	3.30106e-05	260	261	1.38871e-05	72	73	1.19011e-06	14	15	2.42801e-07	NA	NA	NA	NA	NA	NA	NA	NA	NA	NA	NA	NA	NA	NA	NA	806	807	4.43635e-05	994	995	5.51508e-05	NA	NA	NA	NA	NA	NA	NA	NA	NA	7	8	2.43971e-07	57	58
FALRVFSL	TTCGCCTTACGCGTCTTTTCGCTG	Pool 13	NA	1	1.08231e-07	NA	1	5.32072e-08	NA	1	1.63029e-08	NA	1	1.61867e-08	NA	NA	NA	NA	NA	NA	NA	NA	NA	NA	NA	NA	NA	NA	NA	NA	1	5.49733e-08	NA	1	5.5428e-08	NA	NA	NA	NA	NA	NA	NA	NA	NA	NA	1	3.04964e-08	NA	1
FALVRTAL	TTCGCCTTAGTCCGCACTGCACTG	Pool 13	12	13	1.40701e-06	NA	1	5.32072e-08	NA	1	1.63029e-08	NA	1	1.61867e-08	NA	NA	NA	NA	NA	NA	NA	NA	NA	NA	NA	NA	NA	NA	NA	100	101	5.5523e-06	2	3	1.66284e-07	NA	NA	NA	NA	NA	NA	NA	NA	NA	2	3	9.14892e-08	107	108
FAMLATLL	TTCGCTATGTTAGCAACGCTTCTT	Pool 13	627	628	6.79694e-05	136	137	7.28939e-06	20	21	3.42361e-07	20	21	3.39921e-07	NA	NA	NA	NA	NA	NA	NA	NA	NA	NA	NA	NA	NA	NA	NA	800	801	4.40336e-05	718	719	3.98527e-05	NA	NA	NA	NA	NA	NA	NA	NA	NA	12	13	3.96453e-07	14	15
FAMYCLLL	TTTGCCATGTATTGCCTTCTATTG	Pool 13	2243	2244	0.000242871	350	351	1.86757e-05	148	149	2.42913e-06	198	199	3.22116e-06	NA	NA	NA	NA	NA	NA	NA	NA	NA	NA	NA	NA	NA	NA	NA	4106	4107	0.000225775	3538	3539	0.00019616	NA	NA	NA	NA	NA	NA	NA	NA	NA	419	420	1.28085e-05	501	502
FAPYFGHM	TTCGCGCCCTACTTCGGGCATATG	Pool 13	305	306	3.31188e-05	702	703	3.74047e-05	46	47	7.66235e-07	NA	1	1.61867e-08	NA	NA	NA	NA	NA	NA	NA	NA	NA	NA	NA	NA	NA	NA	NA	570	571	3.13898e-05	270	271	1.5021e-05	NA	NA	NA	NA	NA	NA	NA	NA	NA	140	141	4.29999e-06	65	66
FAQIFEPL	TTTGCGCAGATCTTTGAACCACTG	Pool 13	607	608	6.58047e-05	62	63	3.35205e-06	58	59	9.6187e-07	4	5	8.09336e-08	NA	NA	NA	NA	NA	NA	NA	NA	NA	NA	NA	NA	NA	NA	NA	1766	1767	9.71378e-05	6658	6659	0.000369095	NA	NA	NA	NA	NA	NA	NA	NA	NA	86	87	2.65319e-06	67	68
FARSFHPM	TTTGCTCGAAGCTTCCACCCAATG	Pool 13	298	299	3.23612e-05	254	255	1.35678e-05	640	641	1.04501e-05	6	7	1.13307e-07	NA	NA	NA	NA	NA	NA	NA	NA	NA	NA	NA	NA	NA	NA	NA	586	587	3.22693e-05	518	519	2.87671e-05	NA	NA	NA	NA	NA	NA	NA	NA	NA	163	164	5.00141e-06	67	68
FASLFFIL	TTTGCATCCCTCTTCTTCATCTTA	Pool 13	21832	21833	0.00236302	15724	15725	0.000836683	9266	9267	0.000151079	20772	20773	0.000336247	NA	NA	NA	NA	NA	NA	NA	NA	NA	NA	NA	NA	NA	NA	NA	35438	35439	0.0019482	165886	165887	0.00919478	NA	NA	NA	NA	NA	NA	NA	NA	NA	13298	13299	0.000405572	14682	14683
FATFFPEI	TTTGCAACGTTCTTCCCAGAGATA	Pool 13	159	160	1.7317e-05	26	27	1.43659e-06	12	13	2.11937e-07	46	47	7.60776e-07	NA	NA	NA	NA	NA	NA	NA	NA	NA	NA	NA	NA	NA	NA	NA	452	453	2.49029e-05	314	315	1.74598e-05	NA	NA	NA	NA	NA	NA	NA	NA	NA	100	101	3.08014e-06	62	63
FAVLWLPL	TTTGCGGTCCTCTGGCTACCTCTG	Pool 13	115	116	1.25549e-05	54	55	2.9264e-06	4	5	8.15144e-08	NA	1	1.61867e-08	NA	NA	NA	NA	NA	NA	NA	NA	NA	NA	NA	NA	NA	NA	NA	218	219	1.20392e-05	16	17	9.42275e-07	NA	NA	NA	NA	NA	NA	NA	NA	NA	NA	1	3.04964e-08	4	5
FAVLYTAI	TTCGCTGTCCTGTATACAGCTATC	Pool 13	1362	1363	0.000147519	910	911	4.84718e-05	176	177	2.88561e-06	950	951	1.53936e-05	NA	NA	NA	NA	NA	NA	NA	NA	NA	NA	NA	NA	NA	NA	NA	8822	8823	0.000485029	16306	16307	0.000903864	NA	NA	NA	NA	NA	NA	NA	NA	NA	168	169	5.15389e-06	549	550
FAVNHFTL	TTTGCCGTGAATCATTTTACTTTG	Pool 13	231	232	2.51097e-05	176	177	9.41767e-06	132	133	2.16828e-06	22	23	3.72295e-07	NA	NA	NA	NA	NA	NA	NA	NA	NA	NA	NA	NA	NA	NA	NA	988	989	5.43686e-05	1398	1399	7.75437e-05	NA	NA	NA	NA	NA	NA	NA	NA	NA	26	27	8.23403e-07	1	2
FAWFEYAL	TTCGCGTGGTTCGAATACGCTCTA	Pool 13	78	79	8.55029e-06	68	69	3.6713e-06	NA	1	1.63029e-08	6	7	1.13307e-07	NA	NA	NA	NA	NA	NA	NA	NA	NA	NA	NA	NA	NA	NA	NA	1118	1119	6.15151e-05	1074	1075	5.95851e-05	NA	NA	NA	NA	NA	NA	NA	NA	NA	NA	1	3.04964e-08	4	5
FAYIYFST	TTTGCTTACATATACTTTTCAACA	Pool 13	1552	1553	0.000168083	590	591	3.14454e-05	68	69	1.1249e-06	486	487	7.88294e-06	NA	NA	NA	NA	NA	NA	NA	NA	NA	NA	NA	NA	NA	NA	NA	1738	1739	9.55986e-05	1816	1817	0.000100713	NA	NA	NA	NA	NA	NA	NA	NA	NA	73	74	2.25673e-06	120	121
FAYLREHF	TTTGCCTATCTCAGGGAACATTTC	Pool 13	720	721	7.80349e-05	114	115	6.11883e-06	180	181	2.95082e-06	610	611	9.89009e-06	NA	NA	NA	NA	NA	NA	NA	NA	NA	NA	NA	NA	NA	NA	NA	3482	3483	0.000191472	1128	1129	6.25782e-05	NA	NA	NA	NA	NA	NA	NA	NA	NA	90	91	2.77517e-06	396	397
FCMMFANM	TTCTGTATGATGTTTGCGAACATG	Pool 13	926	927	0.000100331	326	327	1.73988e-05	74	75	1.22272e-06	3836	3837	6.21085e-05	NA	NA	NA	NA	NA	NA	NA	NA	NA	NA	NA	NA	NA	NA	NA	1906	1907	0.000104834	4740	4741	0.000262784	NA	NA	NA	NA	NA	NA	NA	NA	NA	613	614	1.87248e-05	449	450
FEKIILSN	TTCGAGAAAATAATACTCAGCAAC	Pool 13	1200	1201	0.000129986	1120	1121	5.96453e-05	386	387	6.30922e-06	246	247	3.99812e-06	NA	NA	NA	NA	NA	NA	NA	NA	NA	NA	NA	NA	NA	NA	NA	2518	2519	0.000138478	2916	2917	0.000161683	NA	NA	NA	NA	NA	NA	NA	NA	NA	377	378	1.15276e-05	246	247
FFCLFSRL	TTCTTCTGTCTTTTCAGCCGGTTA	Pool 13	213	214	2.31615e-05	254	255	1.35678e-05	44	45	7.3363e-07	1786	1787	2.89257e-05	NA	NA	NA	NA	NA	NA	NA	NA	NA	NA	NA	NA	NA	NA	NA	658	659	3.62274e-05	676	677	3.75247e-05	NA	NA	NA	NA	NA	NA	NA	NA	NA	57	58	1.76879e-06	431	432
FFFRVAAL	TTCTTCTTTCGGGTTGCTGCTTTA	Pool 13	1338	1339	0.000144922	158	159	8.45994e-06	364	365	5.95055e-06	28	29	4.69415e-07	NA	NA	NA	NA	NA	NA	NA	NA	NA	NA	NA	NA	NA	NA	NA	3828	3829	0.000210493	3882	3883	0.000215227	NA	NA	NA	NA	NA	NA	NA	NA	NA	46	47	1.43333e-06	299	300
FFLYFGDL	TTCTTTCTTTACTTCGGTGACTTG	Pool 13	587	588	6.36401e-05	388	389	2.06976e-05	70	71	1.1575e-06	440	441	7.13835e-06	NA	NA	NA	NA	NA	NA	NA	NA	NA	NA	NA	NA	NA	NA	NA	1480	1481	8.14155e-05	1150	1151	6.37976e-05	NA	NA	NA	NA	NA	NA	NA	NA	NA	120	121	3.69006e-06	160	161
FFLYHIHL	TTCTTTCTGTACCATATTCATCTC	Pool 13	12307	12308	0.00133211	1516	1517	8.07153e-05	422	423	6.89612e-06	7870	7871	0.000127406	NA	NA	NA	NA	NA	NA	NA	NA	NA	NA	NA	NA	NA	NA	NA	8644	8645	0.000475244	4638	4639	0.00025713	NA	NA	NA	NA	NA	NA	NA	NA	NA	1351	1352	4.12311e-05	1093	1094
FFPSFCML	TTCTTTCCCTCGTTTTGTATGCTA	Pool 13	1417	1418	0.000153472	1028	1029	5.47502e-05	1198	1199	1.95472e-05	348	349	5.64917e-06	NA	NA	NA	NA	NA	NA	NA	NA	NA	NA	NA	NA	NA	NA	NA	3478	3479	0.000191252	3596	3597	0.000199374	NA	NA	NA	NA	NA	NA	NA	NA	NA	2028	2029	6.18772e-05	1967	1968
FFRFMNVL	TTCTTTCGCTTCATGAACGTACTA	Pool 13	625	626	6.77529e-05	336	337	1.79308e-05	256	257	4.18984e-06	720	721	1.16706e-05	NA	NA	NA	NA	NA	NA	NA	NA	NA	NA	NA	NA	NA	NA	NA	1544	1545	8.49338e-05	1916	1917	0.000106255	NA	NA	NA	NA	NA	NA	NA	NA	NA	40	41	1.25035e-06	567	568
FFSFLGLL	TTCTTTAGCTTTCTGGGGCTATTA	Pool 13	650	651	7.04587e-05	406	407	2.16553e-05	418	419	6.83091e-06	1272	1273	2.06057e-05	NA	NA	NA	NA	NA	NA	NA	NA	NA	NA	NA	NA	NA	NA	NA	2436	2437	0.00013397	1386	1387	7.68786e-05	NA	NA	NA	NA	NA	NA	NA	NA	NA	1748	1749	5.33382e-05	308	309
FGAKYVSL	TTCGGGGCAAAGTACGTTTCACTG	Pool 13	73	74	8.00913e-06	48	49	2.60715e-06	546	547	8.91768e-06	40	41	6.63656e-07	NA	NA	NA	NA	NA	NA	NA	NA	NA	NA	NA	NA	NA	NA	NA	454	455	2.50129e-05	326	327	1.81249e-05	NA	NA	NA	NA	NA	NA	NA	NA	NA	177	178	5.42836e-06	349	350
FGFFGTTV	TTTGGTTTCTTTGGTACTACAGTC	Pool 13	1141	1142	0.0001236	456	457	2.43157e-05	766	767	1.25043e-05	2014	2015	3.26163e-05	NA	NA	NA	NA	NA	NA	NA	NA	NA	NA	NA	NA	NA	NA	NA	2582	2583	0.000141996	2024	2025	0.000112242	NA	NA	NA	NA	NA	NA	NA	NA	NA	156	157	4.78793e-06	1179	1180
FGFFTPLL	TTTGGGTTCTTTACCCCTCTTCTG	Pool 13	2206	2207	0.000238867	1028	1029	5.47502e-05	568	569	9.27634e-06	242	243	3.93337e-06	NA	NA	NA	NA	NA	NA	NA	NA	NA	NA	NA	NA	NA	NA	NA	5376	5377	0.000295591	6432	6433	0.000356568	NA	NA	NA	NA	NA	NA	NA	NA	NA	1825	1826	5.56864e-05	288	289
FGFLSGML	TTCGGTTTCCTTAGTGGTATGTTG	Pool 13	7075	7076	0.000765846	752	753	4.0065e-05	444	445	7.25478e-06	2248	2249	3.6404e-05	NA	NA	NA	NA	NA	NA	NA	NA	NA	NA	NA	NA	NA	NA	NA	4870	4871	0.000267775	8526	8527	0.000472634	NA	NA	NA	NA	NA	NA	NA	NA	NA	387	388	1.18326e-05	560	561
FGGCFAQM	TTCGGAGGGTGCTTTGCCCAAATG	Pool 13	560	561	6.07179e-05	8	9	4.78865e-07	12	13	2.11937e-07	NA	1	1.61867e-08	NA	NA	NA	NA	NA	NA	NA	NA	NA	NA	NA	NA	NA	NA	NA	692	693	3.80965e-05	374	375	2.07855e-05	NA	NA	NA	NA	NA	NA	NA	NA	NA	52	53	1.61631e-06	24	25
FGIYSSFL	TTTGGCATATACTCTAGTTTCTTA	Pool 13	277	278	3.00883e-05	172	173	9.20484e-06	22	23	3.74966e-07	902	903	1.46166e-05	NA	NA	NA	NA	NA	NA	NA	NA	NA	NA	NA	NA	NA	NA	NA	1672	1673	9.19703e-05	358	359	1.98986e-05	NA	NA	NA	NA	NA	NA	NA	NA	NA	20	21	6.40424e-07	39	40
FGLIWGLM	TTTGGCCTAATTTGGGGTCTTATG	Pool 13	6	7	7.5762e-07	14	15	7.98108e-07	16	17	2.77149e-07	NA	1	1.61867e-08	NA	NA	NA	NA	NA	NA	NA	NA	NA	NA	NA	NA	NA	NA	NA	18	19	1.04449e-06	12	13	7.20563e-07	NA	NA	NA	NA	NA	NA	NA	NA	NA	NA	1	3.04964e-08	NA	1
FGLVFDHV	TTCGGACTAGTCTTTGATCACGTC	Pool 13	102	103	1.11478e-05	26	27	1.43659e-06	8	9	1.46726e-07	4	5	8.09336e-08	NA	NA	NA	NA	NA	NA	NA	NA	NA	NA	NA	NA	NA	NA	NA	144	145	7.97113e-06	172	173	9.58904e-06	NA	NA	NA	NA	NA	NA	NA	NA	NA	NA	1	3.04964e-08	1	2
FGMSVFNL	TTCGGTATGTCTGTGTTCAACCTA	Pool 13	7773	7774	0.000841391	5352	5353	0.000284818	6670	6671	0.000108757	14354	14355	0.00023236	NA	NA	NA	NA	NA	NA	NA	NA	NA	NA	NA	NA	NA	NA	NA	18722	18723	0.00102927	99722	99723	0.00552744	NA	NA	NA	NA	NA	NA	NA	NA	NA	3254	3255	9.92658e-05	6214	6215
FGPFFCIL	TTCGGACCCTTCTTTTGCATATTG	Pool 13	NA	1	1.08231e-07	NA	1	5.32072e-08	NA	1	1.63029e-08	2	3	4.85602e-08	NA	NA	NA	NA	NA	NA	NA	NA	NA	NA	NA	NA	NA	NA	NA	NA	1	5.49733e-08	NA	1	5.5428e-08	NA	NA	NA	NA	NA	NA	NA	NA	NA	NA	1	3.04964e-08	NA	1
FGPYHIGL	TTTGGACCTTACCACATAGGACTG	Pool 13	1	2	2.16463e-07	NA	1	5.32072e-08	NA	1	1.63029e-08	4	5	8.09336e-08	NA	NA	NA	NA	NA	NA	NA	NA	NA	NA	NA	NA	NA	NA	NA	NA	1	5.49733e-08	NA	1	5.5428e-08	NA	NA	NA	NA	NA	NA	NA	NA	NA	NA	1	3.04964e-08	NA	1
FGQRYIHI	TTCGGACAGCGATACATACATATT	Pool 13	5857	5858	0.00063402	78810	78811	0.00419331	10368	10369	0.000169045	59940	59941	0.000970249	NA	NA	NA	NA	NA	NA	NA	NA	NA	NA	NA	NA	NA	NA	NA	16030	16031	0.000881277	12820	12821	0.000710642	NA	NA	NA	NA	NA	NA	NA	NA	NA	6188	6189	0.000188742	6065	6066
FGTVYTML	TTCGGTACGGTATACACTATGTTG	Pool 13	527	528	5.71462e-05	220	221	1.17588e-05	168	169	2.75519e-06	248	249	4.0305e-06	NA	NA	NA	NA	NA	NA	NA	NA	NA	NA	NA	NA	NA	NA	NA	1342	1343	7.38291e-05	760	761	4.21807e-05	NA	NA	NA	NA	NA	NA	NA	NA	NA	860	861	2.62574e-05	18	19
FGYELAVI	TTTGGTTATGAGTTAGCAGTAATA	Pool 13	4444	4445	0.000481089	5544	5545	0.000295034	2132	2133	3.4774e-05	14478	14479	0.000234368	NA	NA	NA	NA	NA	NA	NA	NA	NA	NA	NA	NA	NA	NA	NA	11522	11523	0.000633457	15382	15383	0.000852648	NA	NA	NA	NA	NA	NA	NA	NA	NA	3406	3407	0.000103901	5613	5614
FGYKEIPM	TTCGGGTATAAAGAGATTCCGATG	Pool 13	10	11	1.19055e-06	20	21	1.11735e-06	NA	1	1.63029e-08	NA	1	1.61867e-08	NA	NA	NA	NA	NA	NA	NA	NA	NA	NA	NA	NA	NA	NA	NA	36	37	2.03401e-06	124	125	6.92849e-06	NA	NA	NA	NA	NA	NA	NA	NA	NA	2	3	9.14892e-08	NA	1
FGYMVSSI	TTTGGCTATATGGTTTCCTCCATA	Pool 13	556	557	6.02849e-05	232	233	1.23973e-05	576	577	9.40676e-06	576	577	9.33974e-06	NA	NA	NA	NA	NA	NA	NA	NA	NA	NA	NA	NA	NA	NA	NA	1894	1895	0.000104174	776	777	4.30675e-05	NA	NA	NA	NA	NA	NA	NA	NA	NA	152	153	4.66595e-06	107	108
FGYRKTPI	TTCGGGTACAGGAAAACGCCTATC	Pool 13	9	10	1.08231e-06	NA	1	5.32072e-08	NA	1	1.63029e-08	NA	1	1.61867e-08	NA	NA	NA	NA	NA	NA	NA	NA	NA	NA	NA	NA	NA	NA	NA	2	3	1.6492e-07	88	89	4.93309e-06	NA	NA	NA	NA	NA	NA	NA	NA	NA	NA	1	3.04964e-08	NA	1
FGYTSYSV	TTTGGTTACACATCCTATAGTGTT	Pool 13	464	465	5.03276e-05	358	359	1.91014e-05	74	75	1.22272e-06	1224	1225	1.98287e-05	NA	NA	NA	NA	NA	NA	NA	NA	NA	NA	NA	NA	NA	NA	NA	1608	1609	8.8452e-05	1692	1693	9.38395e-05	NA	NA	NA	NA	NA	NA	NA	NA	NA	736	737	2.24758e-05	101	102
FHFPIYYL	TTTCACTTCCCTATCTATTACCTC	Pool 13	16938	16939	0.00183333	9628	9629	0.000512332	6908	6909	0.000112637	25738	25739	0.00041663	NA	NA	NA	NA	NA	NA	NA	NA	NA	NA	NA	NA	NA	NA	NA	14218	14219	0.000781665	17426	17427	0.000965943	NA	NA	NA	NA	NA	NA	NA	NA	NA	13090	13091	0.000399228	19533	19534
FHFRFWHF	TTTCATTTCCGCTTTTGGCATTTC	Pool 13	2048	2049	0.000221766	542	543	2.88915e-05	1010	1011	1.64822e-05	3180	3181	5.149e-05	NA	NA	NA	NA	NA	NA	NA	NA	NA	NA	NA	NA	NA	NA	NA	2716	2717	0.000149362	5512	5513	0.000305574	NA	NA	NA	NA	NA	NA	NA	NA	NA	790	791	2.41226e-05	368	369
FHVLYSSL	TTTCACGTCTTATACTCTTCACTG	Pool 13	1183	1184	0.000128146	868	869	4.6237e-05	450	451	7.3526e-06	2732	2733	4.42383e-05	NA	NA	NA	NA	NA	NA	NA	NA	NA	NA	NA	NA	NA	NA	NA	5970	5971	0.000328246	2068	2069	0.00011468	NA	NA	NA	NA	NA	NA	NA	NA	NA	118	119	3.62907e-06	249	250
FIFFTALV	TTTATTTTCTTCACAGCGCTAGTA	Pool 13	346	347	3.75563e-05	242	243	1.29293e-05	54	55	8.96658e-07	228	229	3.70676e-06	NA	NA	NA	NA	NA	NA	NA	NA	NA	NA	NA	NA	NA	NA	NA	746	747	4.10651e-05	878	879	4.87212e-05	NA	NA	NA	NA	NA	NA	NA	NA	NA	579	580	1.76879e-05	21	22
FIFGFNVI	TTTATCTTTGGTTTCAATGTTATA	Pool 13	1046	1047	0.000113318	232	233	1.23973e-05	120	121	1.97265e-06	122	123	1.99097e-06	NA	NA	NA	NA	NA	NA	NA	NA	NA	NA	NA	NA	NA	NA	NA	1546	1547	8.50437e-05	2638	2639	0.000146274	NA	NA	NA	NA	NA	NA	NA	NA	NA	57	58	1.76879e-06	428	429
FIFGYTKI	TTTATCTTTGGCTATACTAAAATA	Pool 13	941	942	0.000101954	446	447	2.37836e-05	184	185	3.01603e-06	268	269	4.35423e-06	NA	NA	NA	NA	NA	NA	NA	NA	NA	NA	NA	NA	NA	NA	NA	922	923	5.07404e-05	942	943	5.22686e-05	NA	NA	NA	NA	NA	NA	NA	NA	NA	326	327	9.97232e-06	114	115
FIFRGAQI	TTCATATTCCGCGGAGCACAAATC	Pool 13	120	121	1.3096e-05	284	285	1.5164e-05	20	21	3.42361e-07	8	9	1.45681e-07	NA	NA	NA	NA	NA	NA	NA	NA	NA	NA	NA	NA	NA	NA	NA	532	533	2.93008e-05	724	725	4.01853e-05	NA	NA	NA	NA	NA	NA	NA	NA	NA	34	35	1.06737e-06	4	5
FIFSFHNA	TTCATATTCTCATTTCACAACGCT	Pool 13	123	124	1.34207e-05	54	55	2.9264e-06	4	5	8.15144e-08	114	115	1.86147e-06	NA	NA	NA	NA	NA	NA	NA	NA	NA	NA	NA	NA	NA	NA	NA	144	145	7.97113e-06	176	177	9.81075e-06	NA	NA	NA	NA	NA	NA	NA	NA	NA	4	5	1.52482e-07	2	3
FIHNWPQL	TTTATCCATAACTGGCCCCAGCTT	Pool 13	31	32	3.46341e-06	22	23	1.22377e-06	2	3	4.89086e-08	NA	1	1.61867e-08	NA	NA	NA	NA	NA	NA	NA	NA	NA	NA	NA	NA	NA	NA	NA	314	315	1.73166e-05	898	899	4.98297e-05	NA	NA	NA	NA	NA	NA	NA	NA	NA	5	6	1.82978e-07	1	2
FIHTFTAM	TTTATACATACATTCACCGCTATG	Pool 13	244	245	2.65167e-05	172	173	9.20484e-06	12	13	2.11937e-07	476	477	7.72107e-06	NA	NA	NA	NA	NA	NA	NA	NA	NA	NA	NA	NA	NA	NA	NA	1962	1963	0.000107913	476	477	2.64391e-05	NA	NA	NA	NA	NA	NA	NA	NA	NA	NA	1	3.04964e-08	152	153
FIKSFQAL	TTCATCAAATCGTTTCAGGCTCTT	Pool 13	1665	1666	0.000180314	818	819	4.35767e-05	452	453	7.38521e-06	8480	8481	0.00013728	NA	NA	NA	NA	NA	NA	NA	NA	NA	NA	NA	NA	NA	NA	NA	4588	4589	0.000252272	11822	11823	0.000655325	NA	NA	NA	NA	NA	NA	NA	NA	NA	536	537	1.63766e-05	1308	1309
FILLFSKV	TTCATCTTATTGTTTTCAAAGGTT	Pool 13	5265	5266	0.000569947	1666	1667	8.86964e-05	4006	4007	6.53256e-05	4070	4071	6.58962e-05	NA	NA	NA	NA	NA	NA	NA	NA	NA	NA	NA	NA	NA	NA	NA	19050	19051	0.0010473	6096	6097	0.000337944	NA	NA	NA	NA	NA	NA	NA	NA	NA	3884	3885	0.000118478	2195	2196
FILYSYYL	TTCATCTTGTACAGCTACTATCTA	Pool 13	1106	1107	0.000119812	346	347	1.84629e-05	120	121	1.97265e-06	952	953	1.5426e-05	NA	NA	NA	NA	NA	NA	NA	NA	NA	NA	NA	NA	NA	NA	NA	2514	2515	0.000138258	2484	2485	0.000137738	NA	NA	NA	NA	NA	NA	NA	NA	NA	364	365	1.11312e-05	356	357
FIMIFVTL	TTTATTATGATCTTCGTAACTCTC	Pool 13	1283	1284	0.000138969	814	815	4.33639e-05	970	971	1.58301e-05	2926	2927	4.73786e-05	NA	NA	NA	NA	NA	NA	NA	NA	NA	NA	NA	NA	NA	NA	NA	2342	2343	0.000128802	7398	7399	0.000410111	NA	NA	NA	NA	NA	NA	NA	NA	NA	1443	1444	4.40368e-05	1138	1139
FIQFFQDL	TTTATTCAATTCTTTCAAGACTTG	Pool 13	273	274	2.96554e-05	444	445	2.36772e-05	94	95	1.54877e-06	830	831	1.34512e-05	NA	NA	NA	NA	NA	NA	NA	NA	NA	NA	NA	NA	NA	NA	NA	622	623	3.42484e-05	602	603	3.34231e-05	NA	NA	NA	NA	NA	NA	NA	NA	NA	11	12	3.65957e-07	16	17
FISHYTLL	TTCATCTCACATTATACTCTGTTA	Pool 13	2972	2973	0.000321772	3108	3109	0.000165421	3372	3373	5.49896e-05	14726	14727	0.000238382	NA	NA	NA	NA	NA	NA	NA	NA	NA	NA	NA	NA	NA	NA	NA	14500	14501	0.000797168	7224	7225	0.000400467	NA	NA	NA	NA	NA	NA	NA	NA	NA	4838	4839	0.000147572	3601	3602
FISMFYIL	TTTATTTCAATGTTTTATATCCTG	Pool 13	994	995	0.00010769	1424	1425	7.58202e-05	192	193	3.14646e-06	660	661	1.06994e-05	NA	NA	NA	NA	NA	NA	NA	NA	NA	NA	NA	NA	NA	NA	NA	2542	2543	0.000139797	2520	2521	0.000139734	NA	NA	NA	NA	NA	NA	NA	NA	NA	289	290	8.84395e-06	593	594
FIYAWSGF	TTTATATATGCGTGGAGCGGCTTT	Pool 13	23	24	2.59756e-06	2	3	1.59622e-07	12	13	2.11937e-07	6	7	1.13307e-07	NA	NA	NA	NA	NA	NA	NA	NA	NA	NA	NA	NA	NA	NA	NA	58	59	3.24342e-06	118	119	6.59593e-06	NA	NA	NA	NA	NA	NA	NA	NA	NA	NA	1	3.04964e-08	NA	1
FIYQYWKL	TTTATCTACCAGTACTGGAAACTT	Pool 13	405	406	4.3942e-05	156	157	8.35353e-06	NA	1	1.63029e-08	12	13	2.10427e-07	NA	NA	NA	NA	NA	NA	NA	NA	NA	NA	NA	NA	NA	NA	NA	428	429	2.35835e-05	558	559	3.09842e-05	NA	NA	NA	NA	NA	NA	NA	NA	NA	4	5	1.52482e-07	2	3
FIYTSKLL	TTTATCTATACTAGTAAGCTATTG	Pool 13	1228	1229	0.000133016	1476	1477	7.8587e-05	132	133	2.16828e-06	282	283	4.58084e-06	NA	NA	NA	NA	NA	NA	NA	NA	NA	NA	NA	NA	NA	NA	NA	2918	2919	0.000160467	2370	2371	0.00013142	NA	NA	NA	NA	NA	NA	NA	NA	NA	254	255	7.77658e-06	179	180
FKYTFHQV	TTCAAGTATACGTTCCACCAAGTC	Pool 13	1106	1107	0.000119812	506	507	2.6976e-05	114	115	1.87483e-06	1850	1851	2.99616e-05	NA	NA	NA	NA	NA	NA	NA	NA	NA	NA	NA	NA	NA	NA	NA	1434	1435	7.88867e-05	7102	7103	0.000393705	NA	NA	NA	NA	NA	NA	NA	NA	NA	19	20	6.09928e-07	170	171
FLALFRLL	TTTCTGGCCCTTTTCCGACTGCTT	Pool 13	739	740	8.00913e-05	1030	1031	5.48566e-05	740	741	1.20804e-05	266	267	4.32186e-06	NA	NA	NA	NA	NA	NA	NA	NA	NA	NA	NA	NA	NA	NA	NA	5264	5265	0.000289434	5238	5239	0.000290387	NA	NA	NA	NA	NA	NA	NA	NA	NA	205	206	6.28226e-06	378	379
FLALYAFL	TTCCTGGCCCTCTACGCGTTCCTA	Pool 13	626	627	6.78611e-05	638	639	3.39994e-05	118	119	1.94004e-06	350	351	5.68154e-06	NA	NA	NA	NA	NA	NA	NA	NA	NA	NA	NA	NA	NA	NA	NA	1480	1481	8.14155e-05	1266	1267	7.02272e-05	NA	NA	NA	NA	NA	NA	NA	NA	NA	927	928	2.83007e-05	694	695
FLFKVLNL	TTCCTGTTTAAAGTCCTGAATCTA	Pool 13	745	746	8.07407e-05	4010	4011	0.000213414	110	111	1.80962e-06	352	353	5.71391e-06	NA	NA	NA	NA	NA	NA	NA	NA	NA	NA	NA	NA	NA	NA	NA	1872	1873	0.000102965	1432	1433	7.94283e-05	NA	NA	NA	NA	NA	NA	NA	NA	NA	159	160	4.87942e-06	438	439
FLFLTYLL	TTCTTATTCCTAACATATCTGCTT	Pool 13	338	339	3.66905e-05	72	73	3.88412e-06	66	67	1.09229e-06	1414	1415	2.29042e-05	NA	NA	NA	NA	NA	NA	NA	NA	NA	NA	NA	NA	NA	NA	NA	1154	1155	6.34942e-05	546	547	3.03191e-05	NA	NA	NA	NA	NA	NA	NA	NA	NA	29	30	9.14892e-07	50	51
FLFSFKDI	TTCTTATTTAGCTTTAAAGATATT	Pool 13	2945	2946	0.00031885	3988	3989	0.000212243	1902	1903	3.10244e-05	6904	6905	0.000111769	NA	NA	NA	NA	NA	NA	NA	NA	NA	NA	NA	NA	NA	NA	NA	7392	7393	0.000406418	9034	9035	0.000500792	NA	NA	NA	NA	NA	NA	NA	NA	NA	3244	3245	9.89608e-05	4054	4055
FLFTPFKL	TTCTTATTCACTCCATTTAAGCTC	Pool 13	2655	2656	0.000287463	938	939	4.99616e-05	90	91	1.48356e-06	1684	1685	2.72746e-05	NA	NA	NA	NA	NA	NA	NA	NA	NA	NA	NA	NA	NA	NA	NA	6696	6697	0.000368156	23778	23779	0.00131802	NA	NA	NA	NA	NA	NA	NA	NA	NA	322	323	9.85033e-06	711	712
FLSNFSFL	TTTCTATCCAACTTCTCCTTCTTA	Pool 13	1433	1434	0.000155204	2438	2439	0.000129772	1526	1527	2.48945e-05	494	495	8.01243e-06	NA	NA	NA	NA	NA	NA	NA	NA	NA	NA	NA	NA	NA	NA	NA	5674	5675	0.000311973	4798	4799	0.000265999	NA	NA	NA	NA	NA	NA	NA	NA	NA	8697	8698	0.000265258	2307	2308
FLTIFPPL	TTCTTGACTATCTTCCCACCTCTG	Pool 13	476	477	5.16264e-05	126	127	6.75731e-06	204	205	3.34209e-06	762	763	1.23505e-05	NA	NA	NA	NA	NA	NA	NA	NA	NA	NA	NA	NA	NA	NA	NA	728	729	4.00755e-05	728	729	4.0407e-05	NA	NA	NA	NA	NA	NA	NA	NA	NA	146	147	4.48297e-06	133	134
FLYPAAQL	TTTCTTTACCCGGCGGCTCAACTA	Pool 13	75	76	8.22559e-06	12	13	6.91693e-07	NA	1	1.63029e-08	NA	1	1.61867e-08	NA	NA	NA	NA	NA	NA	NA	NA	NA	NA	NA	NA	NA	NA	NA	66	67	3.68321e-06	170	171	9.47818e-06	NA	NA	NA	NA	NA	NA	NA	NA	NA	NA	1	3.04964e-08	16	17
FLYPWQPL	TTCCTATATCCGTGGCAACCTCTT	Pool 13	395	396	4.28597e-05	68	69	3.6713e-06	98	99	1.61399e-06	40	41	6.63656e-07	NA	NA	NA	NA	NA	NA	NA	NA	NA	NA	NA	NA	NA	NA	NA	1028	1029	5.65675e-05	1460	1461	8.09802e-05	NA	NA	NA	NA	NA	NA	NA	NA	NA	72	73	2.22624e-06	347	348
FLYRKFLF	TTCCTTTATAGGAAGTTCCTTTTC	Pool 13	154	155	1.67759e-05	84	85	4.52261e-06	40	41	6.68418e-07	22	23	3.72295e-07	NA	NA	NA	NA	NA	NA	NA	NA	NA	NA	NA	NA	NA	NA	NA	720	721	3.96358e-05	496	497	2.75477e-05	NA	NA	NA	NA	NA	NA	NA	NA	NA	42	43	1.31134e-06	31	32
FMALWAVL	TTTATGGCATTATGGGCGGTGCTT	Pool 13	1486	1487	0.00016094	506	507	2.6976e-05	206	207	3.3747e-06	3880	3881	6.28207e-05	NA	NA	NA	NA	NA	NA	NA	NA	NA	NA	NA	NA	NA	NA	NA	3812	3813	0.000209613	3220	3221	0.000178533	NA	NA	NA	NA	NA	NA	NA	NA	NA	285	286	8.72197e-06	276	277
FMDLYSHL	TTCATGGATTTGTACTCGCACCTG	Pool 13	300	301	3.25777e-05	634	635	3.37866e-05	126	127	2.07047e-06	34	35	5.66535e-07	NA	NA	NA	NA	NA	NA	NA	NA	NA	NA	NA	NA	NA	NA	NA	752	753	4.13949e-05	724	725	4.01853e-05	NA	NA	NA	NA	NA	NA	NA	NA	NA	1091	1092	3.33021e-05	51	52
FMDSYRYL	TTCATGGATTCATACAGGTATTTA	Pool 13	10267	10268	0.00111132	9666	9667	0.000514354	2414	2415	3.93715e-05	8040	8041	0.000130157	NA	NA	NA	NA	NA	NA	NA	NA	NA	NA	NA	NA	NA	NA	NA	24344	24345	0.00133833	20860	20861	0.00115628	NA	NA	NA	NA	NA	NA	NA	NA	NA	13799	13800	0.00042085	4734	4735
FMITRFFL	TTTATGATAACTCGCTTCTTTCTG	Pool 13	1967	1968	0.000213	720	721	3.83624e-05	164	165	2.68998e-06	144	145	2.34708e-06	NA	NA	NA	NA	NA	NA	NA	NA	NA	NA	NA	NA	NA	NA	NA	3432	3433	0.000188723	3328	3329	0.00018452	NA	NA	NA	NA	NA	NA	NA	NA	NA	62	63	1.92127e-06	507	508
FMLFLASL	TTCATGTTGTTTCTCGCGAGTCTA	Pool 13	125	126	1.36372e-05	14	15	7.98108e-07	NA	1	1.63029e-08	NA	1	1.61867e-08	NA	NA	NA	NA	NA	NA	NA	NA	NA	NA	NA	NA	NA	NA	NA	396	397	2.18244e-05	414	415	2.30026e-05	NA	NA	NA	NA	NA	NA	NA	NA	NA	7	8	2.43971e-07	18	19
FMYAPAIL	TTTATGTACGCTCCAGCGATTCTC	Pool 13	127	128	1.38536e-05	302	303	1.61218e-05	380	381	6.2114e-06	16	17	2.75174e-07	NA	NA	NA	NA	NA	NA	NA	NA	NA	NA	NA	NA	NA	NA	NA	266	267	1.46779e-05	198	199	1.10302e-05	NA	NA	NA	NA	NA	NA	NA	NA	NA	6	7	2.13475e-07	44	45
FMYVFYLL	TTCATGTATGTCTTCTACCTTCTG	Pool 13	771	772	8.35547e-05	668	669	3.55956e-05	312	313	5.1028e-06	394	395	6.39376e-06	NA	NA	NA	NA	NA	NA	NA	NA	NA	NA	NA	NA	NA	NA	NA	1724	1725	9.48289e-05	1490	1491	8.26431e-05	NA	NA	NA	NA	NA	NA	NA	NA	NA	35	36	1.09787e-06	345	346
FNFGYAKA	TTTAACTTCGGGTACGCTAAGGCG	Pool 13	87	88	9.52437e-06	24	25	1.33018e-06	30	31	5.05389e-07	NA	1	1.61867e-08	NA	NA	NA	NA	NA	NA	NA	NA	NA	NA	NA	NA	NA	NA	NA	124	125	6.87166e-06	418	419	2.32243e-05	NA	NA	NA	NA	NA	NA	NA	NA	NA	24	25	7.6241e-07	1	2
FNISYIVV	TTTAACATCTCTTACATAGTCGTA	Pool 13	1672	1673	0.000181071	3928	3929	0.000209051	1122	1123	1.83081e-05	10390	10391	0.000168196	NA	NA	NA	NA	NA	NA	NA	NA	NA	NA	NA	NA	NA	NA	NA	5190	5191	0.000285366	4422	4423	0.000245158	NA	NA	NA	NA	NA	NA	NA	NA	NA	1439	1440	4.39148e-05	1645	1646
FNITKAPL	TTTAATATAACAAAGGCGCCGCTC	Pool 13	112	113	1.22302e-05	12	13	6.91693e-07	2	3	4.89086e-08	28	29	4.69415e-07	NA	NA	NA	NA	NA	NA	NA	NA	NA	NA	NA	NA	NA	NA	NA	116	117	6.43188e-06	180	181	1.00325e-05	NA	NA	NA	NA	NA	NA	NA	NA	NA	22	23	7.01417e-07	320	321
FNLVYENL	TTTAACTTAGTATATGAAAACTTG	Pool 13	253	254	2.74908e-05	174	175	9.31126e-06	18	19	3.09755e-07	66	67	1.08451e-06	NA	NA	NA	NA	NA	NA	NA	NA	NA	NA	NA	NA	NA	NA	NA	1362	1363	7.49286e-05	772	773	4.28458e-05	NA	NA	NA	NA	NA	NA	NA	NA	NA	156	157	4.78793e-06	80	81
FNQAFGFM	TTTAACCAAGCATTTGGGTTTATG	Pool 13	749	750	8.11736e-05	586	587	3.12326e-05	90	91	1.48356e-06	494	495	8.01243e-06	NA	NA	NA	NA	NA	NA	NA	NA	NA	NA	NA	NA	NA	NA	NA	1888	1889	0.000103845	1336	1337	7.41072e-05	NA	NA	NA	NA	NA	NA	NA	NA	NA	122	123	3.75106e-06	99	100
FNQFMMLL	TTTAACCAATTTATGATGCTCCTG	Pool 13	617	618	6.6887e-05	136	137	7.28939e-06	468	469	7.64605e-06	2542	2543	4.11628e-05	NA	NA	NA	NA	NA	NA	NA	NA	NA	NA	NA	NA	NA	NA	NA	1788	1789	9.83472e-05	1558	1559	8.64122e-05	NA	NA	NA	NA	NA	NA	NA	NA	NA	182	183	5.58084e-06	104	105
FNSIYALI	TTTAATTCAATCTACGCACTGATC	Pool 13	323	324	3.5067e-05	138	139	7.3958e-06	4	5	8.15144e-08	258	259	4.19236e-06	NA	NA	NA	NA	NA	NA	NA	NA	NA	NA	NA	NA	NA	NA	NA	986	987	5.42586e-05	626	627	3.47533e-05	NA	NA	NA	NA	NA	NA	NA	NA	NA	477	478	1.45773e-05	54	55
FNWPYMSI	TTCAACTGGCCGTACATGAGTATC	Pool 13	1036	1037	0.000112236	34	35	1.86225e-06	20	21	3.42361e-07	16	17	2.75174e-07	NA	NA	NA	NA	NA	NA	NA	NA	NA	NA	NA	NA	NA	NA	NA	778	779	4.28242e-05	504	505	2.79911e-05	NA	NA	NA	NA	NA	NA	NA	NA	NA	2	3	9.14892e-08	21	22
FNYGMQPL	TTCAATTACGGGATGCAGCCCCTG	Pool 13	20	21	2.27286e-06	NA	1	5.32072e-08	NA	1	1.63029e-08	NA	1	1.61867e-08	NA	NA	NA	NA	NA	NA	NA	NA	NA	NA	NA	NA	NA	NA	NA	40	41	2.25391e-06	48	49	2.71597e-06	NA	NA	NA	NA	NA	NA	NA	NA	NA	1	2	6.09928e-08	3	4
FNYILSMM	TTCAATTATATTCTGTCGATGATG	Pool 13	3064	3065	0.000331729	1188	1189	6.32634e-05	424	425	6.92872e-06	490	491	7.94768e-06	NA	NA	NA	NA	NA	NA	NA	NA	NA	NA	NA	NA	NA	NA	NA	5160	5161	0.000283717	6208	6209	0.000344152	NA	NA	NA	NA	NA	NA	NA	NA	NA	1810	1811	5.5229e-05	1107	1108
FNYWQTEL	TTCAATTACTGGCAGACAGAACTT	Pool 13	706	707	7.65196e-05	1058	1059	5.63464e-05	146	147	2.39652e-06	190	191	3.09166e-06	NA	NA	NA	NA	NA	NA	NA	NA	NA	NA	NA	NA	NA	NA	NA	1168	1169	6.42638e-05	1320	1321	7.32203e-05	NA	NA	NA	NA	NA	NA	NA	NA	NA	373	374	1.14057e-05	39	40
FPSYYLYL	TTTCCATCATATTACTTGTACTTA	Pool 13	824	825	8.9291e-05	242	243	1.29293e-05	8	9	1.46726e-07	6	7	1.13307e-07	NA	NA	NA	NA	NA	NA	NA	NA	NA	NA	NA	NA	NA	NA	NA	738	739	4.06253e-05	858	859	4.76126e-05	NA	NA	NA	NA	NA	NA	NA	NA	NA	18	19	5.79431e-07	1063	1064
FQFLPAHL	TTTCAATTTCTACCTGCACATCTC	Pool 13	1370	1371	0.000148385	21426	21427	0.00114007	68772	68773	0.0011212	125660	125661	0.00203404	NA	NA	NA	NA	NA	NA	NA	NA	NA	NA	NA	NA	NA	NA	NA	4176	4177	0.000229623	5778	5779	0.000320318	NA	NA	NA	NA	NA	NA	NA	NA	NA	80252	80253	0.00244743	55289	55290
FQFYSNLL	TTCCAATTCTACTCAAATCTCCTT	Pool 13	2276	2277	0.000246443	1010	1011	5.37925e-05	1130	1131	1.84386e-05	746	747	1.20915e-05	NA	NA	NA	NA	NA	NA	NA	NA	NA	NA	NA	NA	NA	NA	NA	4714	4715	0.000259199	7138	7139	0.0003957	NA	NA	NA	NA	NA	NA	NA	NA	NA	754	755	2.30248e-05	1228	1229
FQFYYLPA	TTCCAGTTTTACTATCTTCCTGCG	Pool 13	580	581	6.28825e-05	770	771	4.10227e-05	350	351	5.72231e-06	2452	2453	3.9706e-05	NA	NA	NA	NA	NA	NA	NA	NA	NA	NA	NA	NA	NA	NA	NA	990	991	5.44785e-05	1364	1365	7.56592e-05	NA	NA	NA	NA	NA	NA	NA	NA	NA	821	822	2.5068e-05	1078	1079
FQICFIPI	TTTCAAATTTGTTTTATACCGATA	Pool 13	536	537	5.81203e-05	232	233	1.23973e-05	116	117	1.90744e-06	342	343	5.55205e-06	NA	NA	NA	NA	NA	NA	NA	NA	NA	NA	NA	NA	NA	NA	NA	1492	1493	8.20751e-05	1848	1849	0.000102486	NA	NA	NA	NA	NA	NA	NA	NA	NA	52	53	1.61631e-06	496	497
FQYMQYGF	TTCCAATACATGCAATATGGCTTT	Pool 13	3755	3756	0.000406517	1436	1437	7.64587e-05	1306	1307	2.13079e-05	2994	2995	4.84792e-05	NA	NA	NA	NA	NA	NA	NA	NA	NA	NA	NA	NA	NA	NA	NA	7626	7627	0.000419281	6410	6411	0.000355349	NA	NA	NA	NA	NA	NA	NA	NA	NA	1330	1331	4.05907e-05	2906	2907
FRYYLFSL	TTCAGGTATTACTTATTTAGCTTA	Pool 13	3510	3511	0.000380001	1614	1615	8.59296e-05	9564	9565	0.000155937	1102	1103	1.7854e-05	NA	NA	NA	NA	NA	NA	NA	NA	NA	NA	NA	NA	NA	NA	NA	7724	7725	0.000424669	7044	7045	0.00039049	NA	NA	NA	NA	NA	NA	NA	NA	NA	862	863	2.63184e-05	2690	2691
FSAFCGLL	TTCTCTGCCTTCTGCGGACTACTG	Pool 13	342	343	3.71234e-05	576	577	3.07005e-05	96	97	1.58138e-06	38	39	6.31282e-07	NA	NA	NA	NA	NA	NA	NA	NA	NA	NA	NA	NA	NA	NA	NA	414	415	2.28139e-05	856	857	4.75018e-05	NA	NA	NA	NA	NA	NA	NA	NA	NA	97	98	2.98865e-06	303	304
FSAWWARL	TTCTCGGCCTGGTGGGCACGTTTA	Pool 13	NA	1	1.08231e-07	NA	1	5.32072e-08	NA	1	1.63029e-08	NA	1	1.61867e-08	NA	NA	NA	NA	NA	NA	NA	NA	NA	NA	NA	NA	NA	NA	NA	6	7	3.84813e-07	10	11	6.09707e-07	NA	NA	NA	NA	NA	NA	NA	NA	NA	1	2	6.09928e-08	2	3
FSAYWSGV	TTCTCTGCGTATTGGTCTGGTGTA	Pool 13	1502	1503	0.000162672	900	901	4.79397e-05	1042	1043	1.70039e-05	864	865	1.40015e-05	NA	NA	NA	NA	NA	NA	NA	NA	NA	NA	NA	NA	NA	NA	NA	15120	15121	0.000831251	2940	2941	0.000163014	NA	NA	NA	NA	NA	NA	NA	NA	NA	964	965	2.9429e-05	1290	1291
FSFDFFGG	TTCAGCTTCGATTTCTTCGGAGGA	Pool 13	1308	1309	0.000141675	286	287	1.52705e-05	366	367	5.98316e-06	194	195	3.15641e-06	NA	NA	NA	NA	NA	NA	NA	NA	NA	NA	NA	NA	NA	NA	NA	2076	2077	0.00011418	3994	3995	0.000221435	NA	NA	NA	NA	NA	NA	NA	NA	NA	380	381	1.16191e-05	272	273
FSFHLAAV	TTTTCTTTCCACCTTGCGGCCGTA	Pool 13	147	148	1.60183e-05	202	203	1.08011e-05	20	21	3.42361e-07	130	131	2.12046e-06	NA	NA	NA	NA	NA	NA	NA	NA	NA	NA	NA	NA	NA	NA	NA	270	271	1.48978e-05	102	103	5.70908e-06	NA	NA	NA	NA	NA	NA	NA	NA	NA	2	3	9.14892e-08	156	157
FSFISEPM	TTCTCTTTCATTAGCGAACCCATG	Pool 13	242	243	2.63002e-05	444	445	2.36772e-05	98	99	1.61399e-06	210	211	3.4154e-06	NA	NA	NA	NA	NA	NA	NA	NA	NA	NA	NA	NA	NA	NA	NA	566	567	3.11699e-05	1438	1439	7.97608e-05	NA	NA	NA	NA	NA	NA	NA	NA	NA	1253	1254	3.82425e-05	137	138
FSFLFNLT	TTTTCTTTCCTGTTCAATCTTACG	Pool 13	1318	1319	0.000142757	1334	1335	7.10316e-05	796	797	1.29934e-05	1882	1883	3.04796e-05	NA	NA	NA	NA	NA	NA	NA	NA	NA	NA	NA	NA	NA	NA	NA	2812	2813	0.00015464	8746	8747	0.000484828	NA	NA	NA	NA	NA	NA	NA	NA	NA	336	337	1.02773e-05	977	978
FSFLPLNL	TTTTCCTTCCTACCTTTAAATTTA	Pool 13	1711	1712	0.000185292	746	747	3.97458e-05	74	75	1.22272e-06	944	945	1.52965e-05	NA	NA	NA	NA	NA	NA	NA	NA	NA	NA	NA	NA	NA	NA	NA	5572	5573	0.000306366	3674	3675	0.000203698	NA	NA	NA	NA	NA	NA	NA	NA	NA	109	110	3.3546e-06	258	259
FSFLSQSI	TTTTCCTTCTTGTCTCAAAGTATA	Pool 13	469	470	5.08688e-05	52	53	2.81998e-06	12	13	2.11937e-07	50	51	8.25523e-07	NA	NA	NA	NA	NA	NA	NA	NA	NA	NA	NA	NA	NA	NA	NA	614	615	3.38086e-05	496	497	2.75477e-05	NA	NA	NA	NA	NA	NA	NA	NA	NA	22	23	7.01417e-07	NA	1
FSFMVSTL	TTTAGTTTCATGGTATCGACTCTA	Pool 13	433	434	4.69725e-05	86	87	4.62903e-06	54	55	8.96658e-07	24	25	4.04668e-07	NA	NA	NA	NA	NA	NA	NA	NA	NA	NA	NA	NA	NA	NA	NA	990	991	5.44785e-05	1292	1293	7.16683e-05	NA	NA	NA	NA	NA	NA	NA	NA	NA	14	15	4.57446e-07	144	145
FSFPKASF	TTTTCTTTTCCGAAAGCTAGCTTC	Pool 13	772	773	8.36629e-05	1848	1849	9.83801e-05	96	97	1.58138e-06	336	337	5.45493e-06	NA	NA	NA	NA	NA	NA	NA	NA	NA	NA	NA	NA	NA	NA	NA	2480	2481	0.000136389	4070	4071	0.000225647	NA	NA	NA	NA	NA	NA	NA	NA	NA	176	177	5.39786e-06	66	67
FSFTWSSS	TTTTCATTCACCTGGTCGTCGTCA	Pool 13	855	856	9.26461e-05	2970	2971	0.000158079	6294	6295	0.000102627	1784	1785	2.88933e-05	NA	NA	NA	NA	NA	NA	NA	NA	NA	NA	NA	NA	NA	NA	NA	2380	2381	0.000130891	3388	3389	0.000187845	NA	NA	NA	NA	NA	NA	NA	NA	NA	11221	11222	0.000342231	1218	1219
FSFVFGAL	TTCTCGTTTGTATTCGGTGCCTTG	Pool 13	664	665	7.19739e-05	150	151	8.03429e-06	168	169	2.75519e-06	318	319	5.16357e-06	NA	NA	NA	NA	NA	NA	NA	NA	NA	NA	NA	NA	NA	NA	NA	1284	1285	7.06407e-05	618	619	3.43099e-05	NA	NA	NA	NA	NA	NA	NA	NA	NA	79	80	2.43971e-06	381	382
FSFVQSTL	TTCAGCTTCGTCCAATCAACGTTG	Pool 13	453	454	4.91371e-05	54	55	2.9264e-06	NA	1	1.63029e-08	NA	1	1.61867e-08	NA	NA	NA	NA	NA	NA	NA	NA	NA	NA	NA	NA	NA	NA	NA	566	567	3.11699e-05	730	731	4.05178e-05	NA	NA	NA	NA	NA	NA	NA	NA	NA	2	3	9.14892e-08	43	44
FSGRYFHI	TTCAGTGGGAGGTACTTTCACATA	Pool 13	181	182	1.96981e-05	896	897	4.77269e-05	10	11	1.79332e-07	32	33	5.34162e-07	NA	NA	NA	NA	NA	NA	NA	NA	NA	NA	NA	NA	NA	NA	NA	530	531	2.91908e-05	664	665	3.68596e-05	NA	NA	NA	NA	NA	NA	NA	NA	NA	148	149	4.54396e-06	50	51
FSGVYKKL	TTTTCAGGAGTCTATAAGAAGCTA	Pool 13	110	111	1.20137e-05	92	93	4.94827e-06	4	5	8.15144e-08	6	7	1.13307e-07	NA	NA	NA	NA	NA	NA	NA	NA	NA	NA	NA	NA	NA	NA	NA	414	415	2.28139e-05	682	683	3.78573e-05	NA	NA	NA	NA	NA	NA	NA	NA	NA	26	27	8.23403e-07	437	438
FSIMGVNL	TTCTCTATCATGGGAGTAAACCTG	Pool 13	2048	2049	0.000221766	646	647	3.44251e-05	354	355	5.78752e-06	652	653	1.05699e-05	NA	NA	NA	NA	NA	NA	NA	NA	NA	NA	NA	NA	NA	NA	NA	3218	3219	0.000176959	3388	3389	0.000187845	NA	NA	NA	NA	NA	NA	NA	NA	NA	228	229	6.98367e-06	2827	2828
FSIPHAFL	TTTTCGATTCCTCACGCGTTTCTG	Pool 13	NA	1	1.08231e-07	NA	1	5.32072e-08	NA	1	1.63029e-08	NA	1	1.61867e-08	NA	NA	NA	NA	NA	NA	NA	NA	NA	NA	NA	NA	NA	NA	NA	NA	1	5.49733e-08	NA	1	5.5428e-08	NA	NA	NA	NA	NA	NA	NA	NA	NA	NA	1	3.04964e-08	NA	1
FSIRYHDM	TTTTCAATTCGGTATCACGACATG	Pool 13	247	248	2.68414e-05	298	299	1.5909e-05	50	51	8.31447e-07	272	273	4.41898e-06	NA	NA	NA	NA	NA	NA	NA	NA	NA	NA	NA	NA	NA	NA	NA	3652	3653	0.000200817	840	841	4.66149e-05	NA	NA	NA	NA	NA	NA	NA	NA	NA	3520	3521	0.000107378	44	45
FSLFMAAL	TTTTCATTATTCATGGCCGCCCTG	Pool 13	198	199	2.15381e-05	192	193	1.0269e-05	206	207	3.3747e-06	24	25	4.04668e-07	NA	NA	NA	NA	NA	NA	NA	NA	NA	NA	NA	NA	NA	NA	NA	678	679	3.73269e-05	772	773	4.28458e-05	NA	NA	NA	NA	NA	NA	NA	NA	NA	37	38	1.15886e-06	4	5
FSLIFKLI	TTCAGTCTCATTTTCAAGCTTATA	Pool 13	866	867	9.38367e-05	444	445	2.36772e-05	76	77	1.25532e-06	446	447	7.23547e-06	NA	NA	NA	NA	NA	NA	NA	NA	NA	NA	NA	NA	NA	NA	NA	1448	1449	7.96563e-05	2842	2843	0.000157582	NA	NA	NA	NA	NA	NA	NA	NA	NA	314	315	9.60636e-06	286	287
FSLLFPAV	TTCTCCCTTTTGTTCCCAGCGGTG	Pool 13	759	760	8.22559e-05	622	623	3.31481e-05	94	95	1.54877e-06	2	3	4.85602e-08	NA	NA	NA	NA	NA	NA	NA	NA	NA	NA	NA	NA	NA	NA	NA	1686	1687	9.274e-05	1692	1693	9.38395e-05	NA	NA	NA	NA	NA	NA	NA	NA	NA	395	396	1.20766e-05	372	373
FSLNMYEM	TTTTCGTTGAATATGTATGAAATG	Pool 13	69	70	7.5762e-06	NA	1	5.32072e-08	NA	1	1.63029e-08	NA	1	1.61867e-08	NA	NA	NA	NA	NA	NA	NA	NA	NA	NA	NA	NA	NA	NA	NA	138	139	7.64129e-06	158	159	8.81304e-06	NA	NA	NA	NA	NA	NA	NA	NA	NA	8	9	2.74468e-07	2	3
FSLVMCLL	TTTTCCCTAGTGATGTGTCTGCTC	Pool 13	6803	6804	0.000736407	4038	4039	0.000214904	1068	1069	1.74278e-05	8254	8255	0.000133621	NA	NA	NA	NA	NA	NA	NA	NA	NA	NA	NA	NA	NA	NA	NA	19686	19687	0.00108226	15996	15997	0.000886681	NA	NA	NA	NA	NA	NA	NA	NA	NA	13826	13827	0.000421674	1983	1984
FSMCFGFV	TTTTCAATGTGTTTCGGTTTTGTT	Pool 13	766	767	8.30135e-05	880	881	4.68755e-05	2756	2757	4.4947e-05	184	185	2.99454e-06	NA	NA	NA	NA	NA	NA	NA	NA	NA	NA	NA	NA	NA	NA	NA	2956	2957	0.000162556	2582	2583	0.00014317	NA	NA	NA	NA	NA	NA	NA	NA	NA	235	236	7.19715e-06	758	759
FSMYVAPL	TTTAGTATGTACGTTGCACCATTA	Pool 13	379	380	4.1128e-05	170	171	9.09843e-06	198	199	3.24427e-06	702	703	1.13793e-05	NA	NA	NA	NA	NA	NA	NA	NA	NA	NA	NA	NA	NA	NA	NA	794	795	4.37038e-05	774	775	4.29567e-05	NA	NA	NA	NA	NA	NA	NA	NA	NA	240	241	7.34963e-06	259	260
FSPHFHNF	TTCTCACCACATTTTCACAATTTT	Pool 13	1570	1571	0.000170032	652	653	3.47443e-05	234	235	3.83118e-06	484	485	7.85056e-06	NA	NA	NA	NA	NA	NA	NA	NA	NA	NA	NA	NA	NA	NA	NA	3882	3883	0.000213461	4082	4083	0.000226312	NA	NA	NA	NA	NA	NA	NA	NA	NA	533	534	1.62851e-05	557	558
FSPKFQAL	TTCTCACCCAAGTTCCAAGCATTA	Pool 13	383	384	4.15609e-05	34	35	1.86225e-06	116	117	1.90744e-06	76	77	1.24638e-06	NA	NA	NA	NA	NA	NA	NA	NA	NA	NA	NA	NA	NA	NA	NA	1300	1301	7.15203e-05	1400	1401	7.76546e-05	NA	NA	NA	NA	NA	NA	NA	NA	NA	4	5	1.52482e-07	56	57
FSPPFLEL	TTCTCTCCGCCATTCCTAGAACTA	Pool 13	1100	1101	0.000119163	608	609	3.24032e-05	180	181	2.95082e-06	282	283	4.58084e-06	NA	NA	NA	NA	NA	NA	NA	NA	NA	NA	NA	NA	NA	NA	NA	4394	4395	0.000241608	1926	1927	0.00010681	NA	NA	NA	NA	NA	NA	NA	NA	NA	219	220	6.70921e-06	274	275
FSPPHSSL	TTCTCACCGCCCCATTCCAGTTTG	Pool 13	93	94	1.01738e-05	120	121	6.43807e-06	60	61	9.94476e-07	10	11	1.78054e-07	NA	NA	NA	NA	NA	NA	NA	NA	NA	NA	NA	NA	NA	NA	NA	356	357	1.96255e-05	192	193	1.06976e-05	NA	NA	NA	NA	NA	NA	NA	NA	NA	17	18	5.48935e-07	25	26
FSPSFPSL	TTTTCTCCGAGTTTCCCTTCCTTG	Pool 13	860	861	9.31873e-05	166	167	8.8856e-06	286	287	4.67893e-06	162	163	2.63844e-06	NA	NA	NA	NA	NA	NA	NA	NA	NA	NA	NA	NA	NA	NA	NA	1770	1771	9.73577e-05	2414	2415	0.000133859	NA	NA	NA	NA	NA	NA	NA	NA	NA	132	133	4.05602e-06	15	16
FSSLFPYV	TTCTCTTCCCTATTCCCCTATGTA	Pool 13	5428	5429	0.000587589	920	921	4.90038e-05	210	211	3.43991e-06	670	671	1.08613e-05	NA	NA	NA	NA	NA	NA	NA	NA	NA	NA	NA	NA	NA	NA	NA	3392	3393	0.000186524	2520	2521	0.000139734	NA	NA	NA	NA	NA	NA	NA	NA	NA	94	95	2.89716e-06	698	699
FSSPYEHL	TTCAGTAGCCCCTACGAGCATCTG	Pool 13	14	15	1.62347e-06	NA	1	5.32072e-08	2	3	4.89086e-08	NA	1	1.61867e-08	NA	NA	NA	NA	NA	NA	NA	NA	NA	NA	NA	NA	NA	NA	NA	34	35	1.92407e-06	72	73	4.04624e-06	NA	NA	NA	NA	NA	NA	NA	NA	NA	1	2	6.09928e-08	NA	1
FSVFYQYL	TTCTCCGTGTTCTATCAATATTTA	Pool 13	1474	1475	0.000159641	1348	1349	7.17765e-05	650	651	1.06132e-05	722	723	1.1703e-05	NA	NA	NA	NA	NA	NA	NA	NA	NA	NA	NA	NA	NA	NA	NA	3478	3479	0.000191252	7352	7353	0.000407562	NA	NA	NA	NA	NA	NA	NA	NA	NA	877	878	2.67758e-05	826	827
FSVFYTLM	TTTTCCGTGTTTTATACACTTATG	Pool 13	151	152	1.64512e-05	52	53	2.81998e-06	12	13	2.11937e-07	4	5	8.09336e-08	NA	NA	NA	NA	NA	NA	NA	NA	NA	NA	NA	NA	NA	NA	NA	502	503	2.76516e-05	756	757	4.1959e-05	NA	NA	NA	NA	NA	NA	NA	NA	NA	6	7	2.13475e-07	23	24
FSVVLAGL	TTTTCGGTGGTGCTAGCTGGACTT	Pool 13	717	718	7.77102e-05	470	471	2.50606e-05	74	75	1.22272e-06	1006	1007	1.63e-05	NA	NA	NA	NA	NA	NA	NA	NA	NA	NA	NA	NA	NA	NA	NA	1600	1601	8.80123e-05	976	977	5.41531e-05	NA	NA	NA	NA	NA	NA	NA	NA	NA	18	19	5.79431e-07	66	67
FSVVYTFV	TTTTCAGTGGTGTACACATTCGTA	Pool 13	395	396	4.28597e-05	102	103	5.48034e-06	38	39	6.35812e-07	78	79	1.27875e-06	NA	NA	NA	NA	NA	NA	NA	NA	NA	NA	NA	NA	NA	NA	NA	1520	1521	8.36144e-05	742	743	4.1183e-05	NA	NA	NA	NA	NA	NA	NA	NA	NA	200	201	6.12977e-06	534	535
FSYCVGNV	TTTTCCTACTGCGTAGGCAACGTT	Pool 13	2768	2769	0.000299693	8716	8717	0.000463807	2552	2553	4.16213e-05	6398	6399	0.000103579	NA	NA	NA	NA	NA	NA	NA	NA	NA	NA	NA	NA	NA	NA	NA	6048	6049	0.000332534	8344	8345	0.000462546	NA	NA	NA	NA	NA	NA	NA	NA	NA	6966	6967	0.000212468	12732	12733
FSYISFAL	TTTTCCTACATAAGTTTTGCCCTC	Pool 13	201	202	2.18628e-05	72	73	3.88412e-06	54	55	8.96658e-07	82	83	1.3435e-06	NA	NA	NA	NA	NA	NA	NA	NA	NA	NA	NA	NA	NA	NA	NA	574	575	3.16096e-05	354	355	1.96769e-05	NA	NA	NA	NA	NA	NA	NA	NA	NA	96	97	2.95815e-06	441	442
FSYKKMTI	TTCTCATATAAGAAGATGACGATA	Pool 13	118	119	1.28795e-05	38	39	2.07508e-06	16	17	2.77149e-07	4	5	8.09336e-08	NA	NA	NA	NA	NA	NA	NA	NA	NA	NA	NA	NA	NA	NA	NA	482	483	2.65521e-05	302	303	1.67947e-05	NA	NA	NA	NA	NA	NA	NA	NA	NA	25	26	7.92906e-07	111	112
FSYNNKQL	TTCTCATACAACAACAAACAACTG	Pool 13	290	291	3.14954e-05	46	47	2.50074e-06	22	23	3.74966e-07	8	9	1.45681e-07	NA	NA	NA	NA	NA	NA	NA	NA	NA	NA	NA	NA	NA	NA	NA	1146	1147	6.30544e-05	1144	1145	6.3465e-05	NA	NA	NA	NA	NA	NA	NA	NA	NA	386	387	1.18021e-05	9	10
FSYRIPNL	TTCAGCTATCGCATACCCAATCTT	Pool 13	412	413	4.46996e-05	522	523	2.78274e-05	4	5	8.15144e-08	74	75	1.214e-06	NA	NA	NA	NA	NA	NA	NA	NA	NA	NA	NA	NA	NA	NA	NA	470	471	2.58924e-05	600	601	3.33122e-05	NA	NA	NA	NA	NA	NA	NA	NA	NA	12	13	3.96453e-07	44	45
FSYSLGAI	TTTAGTTATAGTTTAGGGGCCATT	Pool 13	1272	1273	0.000137779	968	969	5.15578e-05	426	427	6.96133e-06	762	763	1.23505e-05	NA	NA	NA	NA	NA	NA	NA	NA	NA	NA	NA	NA	NA	NA	NA	2706	2707	0.000148813	2418	2419	0.00013408	NA	NA	NA	NA	NA	NA	NA	NA	NA	836	837	2.55255e-05	733	734
FSYVGFPV	TTTAGTTATGTGGGATTCCCTGTT	Pool 13	2312	2313	0.000250339	904	905	4.81525e-05	1798	1799	2.93289e-05	5128	5129	8.30217e-05	NA	NA	NA	NA	NA	NA	NA	NA	NA	NA	NA	NA	NA	NA	NA	8276	8277	0.000455014	7802	7803	0.000432504	NA	NA	NA	NA	NA	NA	NA	NA	NA	1250	1251	3.8151e-05	1690	1691
FTATWAAM	TTTACAGCAACTTGGGCCGCTATG	Pool 13	198	199	2.15381e-05	498	499	2.65504e-05	64	65	1.05969e-06	2106	2107	3.41054e-05	NA	NA	NA	NA	NA	NA	NA	NA	NA	NA	NA	NA	NA	NA	NA	510	511	2.80914e-05	626	627	3.47533e-05	NA	NA	NA	NA	NA	NA	NA	NA	NA	4	5	1.52482e-07	495	496
FTFFLSLF	TTTACATTCTTCCTCTCACTTTTC	Pool 13	1837	1838	0.000198929	736	737	3.92137e-05	640	641	1.04501e-05	612	613	9.92246e-06	NA	NA	NA	NA	NA	NA	NA	NA	NA	NA	NA	NA	NA	NA	NA	3562	3563	0.00019587	7706	7707	0.000427183	NA	NA	NA	NA	NA	NA	NA	NA	NA	419	420	1.28085e-05	878	879
FTFMESGV	TTTACTTTTATGGAGAGTGGCGTT	Pool 13	5	6	6.49389e-07	16	17	9.04522e-07	4	5	8.15144e-08	4	5	8.09336e-08	NA	NA	NA	NA	NA	NA	NA	NA	NA	NA	NA	NA	NA	NA	NA	114	115	6.32193e-06	10	11	6.09707e-07	NA	NA	NA	NA	NA	NA	NA	NA	NA	1	2	6.09928e-08	NA	1
FTFSLLHL	TTCACCTTCAGCTTGCTACACCTG	Pool 13	36	37	4.00456e-06	NA	1	5.32072e-08	NA	1	1.63029e-08	4	5	8.09336e-08	NA	NA	NA	NA	NA	NA	NA	NA	NA	NA	NA	NA	NA	NA	NA	28	29	1.59423e-06	390	391	2.16723e-05	NA	NA	NA	NA	NA	NA	NA	NA	NA	2	3	9.14892e-08	NA	1
FTFSLLLL	TTTACGTTCAGCCTACTTCTCTTA	Pool 13	869	870	9.41614e-05	738	739	3.93201e-05	690	691	1.12653e-05	132	133	2.15283e-06	NA	NA	NA	NA	NA	NA	NA	NA	NA	NA	NA	NA	NA	NA	NA	2612	2613	0.000143645	7816	7817	0.00043328	NA	NA	NA	NA	NA	NA	NA	NA	NA	112	113	3.44609e-06	509	510
FTFSYKKA	TTCACGTTCTCTTACAAGAAGGCT	Pool 13	2864	2865	0.000310083	412	413	2.19746e-05	666	667	1.0874e-05	236	237	3.83625e-06	NA	NA	NA	NA	NA	NA	NA	NA	NA	NA	NA	NA	NA	NA	NA	4084	4085	0.000224566	4048	4049	0.000224428	NA	NA	NA	NA	NA	NA	NA	NA	NA	3299	3300	0.000100638	1125	1126
FTFTDYYM	TTCACGTTTACAGACTATTATATG	Pool 13	368	369	3.99374e-05	100	101	5.37393e-06	90	91	1.48356e-06	56	57	9.22643e-07	NA	NA	NA	NA	NA	NA	NA	NA	NA	NA	NA	NA	NA	NA	NA	724	725	3.98556e-05	870	871	4.82777e-05	NA	NA	NA	NA	NA	NA	NA	NA	NA	64	65	1.98227e-06	84	85
FTFVCMAL	TTTACCTTTGTCTGTATGGCGTTA	Pool 13	48	49	5.30334e-06	6	7	3.7245e-07	NA	1	1.63029e-08	8	9	1.45681e-07	NA	NA	NA	NA	NA	NA	NA	NA	NA	NA	NA	NA	NA	NA	NA	54	55	3.02353e-06	44	45	2.49426e-06	NA	NA	NA	NA	NA	NA	NA	NA	NA	1	2	6.09928e-08	NA	1
FTFVIPAL	TTCACATTTGTTATTCCCGCGCTC	Pool 13	400	401	4.34008e-05	3016	3017	0.000160526	938	939	1.53084e-05	192	193	3.12404e-06	NA	NA	NA	NA	NA	NA	NA	NA	NA	NA	NA	NA	NA	NA	NA	1302	1303	7.16302e-05	2036	2037	0.000112907	NA	NA	NA	NA	NA	NA	NA	NA	NA	345	346	1.05518e-05	2488	2489
FTIVYAGA	TTCACGATTGTATATGCGGGTGCA	Pool 13	121	122	1.32042e-05	106	107	5.69317e-06	12	13	2.11937e-07	892	893	1.44547e-05	NA	NA	NA	NA	NA	NA	NA	NA	NA	NA	NA	NA	NA	NA	NA	566	567	3.11699e-05	144	145	8.03705e-06	NA	NA	NA	NA	NA	NA	NA	NA	NA	74	75	2.28723e-06	12	13
FTKDFAPV	TTCACAAAGGATTTTGCTCCGGTC	Pool 13	333	334	3.61493e-05	5106	5107	0.000271729	14	15	2.44543e-07	8	9	1.45681e-07	NA	NA	NA	NA	NA	NA	NA	NA	NA	NA	NA	NA	NA	NA	NA	59586	59587	0.00327569	406	407	2.25592e-05	NA	NA	NA	NA	NA	NA	NA	NA	NA	57	58	1.76879e-06	2	3
FTLLLLPL	TTTACCCTGTTGTTACTGCCATTG	Pool 13	1261	1262	0.000136588	856	857	4.55986e-05	628	629	1.02545e-05	1202	1203	1.94726e-05	NA	NA	NA	NA	NA	NA	NA	NA	NA	NA	NA	NA	NA	NA	NA	3028	3029	0.000166514	2460	2461	0.000136408	NA	NA	NA	NA	NA	NA	NA	NA	NA	68	69	2.10425e-06	206	207
FTLVFARL	TTCACACTGGTATTTGCCCGTCTT	Pool 13	135	136	1.47195e-05	12	13	6.91693e-07	390	391	6.37443e-06	86	87	1.40825e-06	NA	NA	NA	NA	NA	NA	NA	NA	NA	NA	NA	NA	NA	NA	NA	648	649	3.56777e-05	420	421	2.33352e-05	NA	NA	NA	NA	NA	NA	NA	NA	NA	3	4	1.21986e-07	20	21
FTMRYSLI	TTCACCATGAGGTACTCGCTGATT	Pool 13	131	132	1.42866e-05	58	59	3.13922e-06	148	149	2.42913e-06	8	9	1.45681e-07	NA	NA	NA	NA	NA	NA	NA	NA	NA	NA	NA	NA	NA	NA	NA	656	657	3.61175e-05	334	335	1.85684e-05	NA	NA	NA	NA	NA	NA	NA	NA	NA	191	192	5.85531e-06	NA	1
FTTSYREL	TTCACAACATCTTATAGGGAGCTA	Pool 13	6009	6010	0.000650471	10004	10005	0.000532338	6884	6885	0.000112245	34258	34259	0.000554541	NA	NA	NA	NA	NA	NA	NA	NA	NA	NA	NA	NA	NA	NA	NA	13640	13641	0.000749891	11242	11243	0.000623176	NA	NA	NA	NA	NA	NA	NA	NA	NA	33996	33997	0.00103679	17107	17108
FTVLFAIV	TTCACAGTCCTCTTCGCAATTGTG	Pool 13	NA	1	1.08231e-07	NA	1	5.32072e-08	2	3	4.89086e-08	NA	1	1.61867e-08	NA	NA	NA	NA	NA	NA	NA	NA	NA	NA	NA	NA	NA	NA	NA	44	45	2.4738e-06	132	133	7.37192e-06	NA	NA	NA	NA	NA	NA	NA	NA	NA	2	3	9.14892e-08	3	4
FTYAKYIV	TTTACATATGCAAAGTATATCGTC	Pool 13	1561	1562	0.000169058	39640	39641	0.00210919	342	343	5.59189e-06	19470	19471	0.000315172	NA	NA	NA	NA	NA	NA	NA	NA	NA	NA	NA	NA	NA	NA	NA	4498	4499	0.000247325	4204	4205	0.000233075	NA	NA	NA	NA	NA	NA	NA	NA	NA	1064	1065	3.24787e-05	448	449
FTYLKKSM	TTTACATATCTCAAGAAAAGCATG	Pool 13	441	442	4.78383e-05	350	351	1.86757e-05	124	125	2.03786e-06	862	863	1.39691e-05	NA	NA	NA	NA	NA	NA	NA	NA	NA	NA	NA	NA	NA	NA	NA	1220	1221	6.71224e-05	1708	1709	9.47264e-05	NA	NA	NA	NA	NA	NA	NA	NA	NA	93	94	2.86666e-06	145	146
FTYRGVDL	TTTACGTACAGAGGAGTCGACCTC	Pool 13	9383	9384	0.00101564	21652	21653	0.0011521	464	465	7.58084e-06	2450	2451	3.96737e-05	NA	NA	NA	NA	NA	NA	NA	NA	NA	NA	NA	NA	NA	NA	NA	27650	27651	0.00152007	769698	769699	0.0426628	NA	NA	NA	NA	NA	NA	NA	NA	NA	632	633	1.93042e-05	1474	1475
FTYVNEKL	TTCACGTATGTGAATGAAAAGTTG	Pool 13	1611	1612	0.000174469	1100	1101	5.85811e-05	214	215	3.50512e-06	6118	6119	9.90466e-05	NA	NA	NA	NA	NA	NA	NA	NA	NA	NA	NA	NA	NA	NA	NA	3338	3339	0.000183556	2854	2855	0.000158247	NA	NA	NA	NA	NA	NA	NA	NA	NA	1051	1052	3.20822e-05	228	229
FTYWLTFV	TTTACCTATTGGTTAACCTTCGTT	Pool 13	1378	1379	0.000149251	23176	23177	0.00123318	1894	1895	3.0894e-05	2686	2687	4.34937e-05	NA	NA	NA	NA	NA	NA	NA	NA	NA	NA	NA	NA	NA	NA	NA	912	913	5.01906e-05	1864	1865	0.000103373	NA	NA	NA	NA	NA	NA	NA	NA	NA	172	173	5.27588e-06	234	235
FVAEHSNL	TTTGTTGCCGAGCACAGCAATTTA	Pool 13	222	223	2.41356e-05	116	117	6.22524e-06	20	21	3.42361e-07	16	17	2.75174e-07	NA	NA	NA	NA	NA	NA	NA	NA	NA	NA	NA	NA	NA	NA	NA	1226	1227	6.74522e-05	666	667	3.69704e-05	NA	NA	NA	NA	NA	NA	NA	NA	NA	32	33	1.00638e-06	46	47
FVAFHPPL	TTCGTCGCTTTTCATCCACCTCTG	Pool 13	224	225	2.43521e-05	292	293	1.55897e-05	28	29	4.72784e-07	46	47	7.60776e-07	NA	NA	NA	NA	NA	NA	NA	NA	NA	NA	NA	NA	NA	NA	NA	504	505	2.77615e-05	436	437	2.4222e-05	NA	NA	NA	NA	NA	NA	NA	NA	NA	7	8	2.43971e-07	175	176
FVALFTLL	TTCGTGGCCTTGTTTACCTTGCTG	Pool 13	766	767	8.30135e-05	874	875	4.65563e-05	34	35	5.70601e-07	6	7	1.13307e-07	NA	NA	NA	NA	NA	NA	NA	NA	NA	NA	NA	NA	NA	NA	NA	3740	3741	0.000205655	778	779	4.31784e-05	NA	NA	NA	NA	NA	NA	NA	NA	NA	99	100	3.04964e-06	45	46
FVASYQEL	TTCGTGGCATCCTACCAGGAACTC	Pool 13	2495	2496	0.000270146	570	571	3.03813e-05	360	361	5.88534e-06	244	245	3.96575e-06	NA	NA	NA	NA	NA	NA	NA	NA	NA	NA	NA	NA	NA	NA	NA	3672	3673	0.000201917	12962	12963	0.000718513	NA	NA	NA	NA	NA	NA	NA	NA	NA	514	515	1.57056e-05	566	567
FVAYFLPV	TTCGTTGCTTACTTCCTGCCTGTA	Pool 13	1668	1669	0.000180638	2818	2819	0.000149991	200	201	3.27688e-06	5012	5013	8.11441e-05	NA	NA	NA	NA	NA	NA	NA	NA	NA	NA	NA	NA	NA	NA	NA	4814	4815	0.000264696	3284	3285	0.000182081	NA	NA	NA	NA	NA	NA	NA	NA	NA	201	202	6.16027e-06	686	687
FVDMFSVL	TTTGTCGACATGTTTTCAGTACTC	Pool 13	1057	1058	0.000114509	2916	2917	0.000155205	3716	3717	6.05978e-05	258	259	4.19236e-06	NA	NA	NA	NA	NA	NA	NA	NA	NA	NA	NA	NA	NA	NA	NA	2428	2429	0.00013353	1866	1867	0.000103484	NA	NA	NA	NA	NA	NA	NA	NA	NA	910	911	2.77822e-05	1454	1455
FVFLRTMV	TTTGTTTTCCTCCGGACCATGGTA	Pool 13	162	163	1.76417e-05	92	93	4.94827e-06	24	25	4.07572e-07	42	43	6.96029e-07	NA	NA	NA	NA	NA	NA	NA	NA	NA	NA	NA	NA	NA	NA	NA	278	279	1.53376e-05	248	249	1.38016e-05	NA	NA	NA	NA	NA	NA	NA	NA	NA	132	133	4.05602e-06	15	16
FVFSHLAL	TTTGTATTCTCGCATCTAGCACTG	Pool 13	448	449	4.85959e-05	112	113	6.01241e-06	50	51	8.31447e-07	58	59	9.55017e-07	NA	NA	NA	NA	NA	NA	NA	NA	NA	NA	NA	NA	NA	NA	NA	1386	1387	7.6248e-05	1462	1463	8.10911e-05	NA	NA	NA	NA	NA	NA	NA	NA	NA	72	73	2.22624e-06	58	59
FVFSRRRV	TTTGTATTCAGCCGCAGGCGGGTC	Pool 13	188	189	2.04557e-05	56	57	3.03281e-06	8	9	1.46726e-07	176	177	2.86505e-06	NA	NA	NA	NA	NA	NA	NA	NA	NA	NA	NA	NA	NA	NA	NA	1566	1567	8.61432e-05	390	391	2.16723e-05	NA	NA	NA	NA	NA	NA	NA	NA	NA	NA	1	3.04964e-08	12	13
FVFTYLRS	TTCGTCTTCACCTACCTGAGAAGT	Pool 13	3422	3423	0.000370476	126	127	6.75731e-06	4	5	8.15144e-08	8	9	1.45681e-07	NA	NA	NA	NA	NA	NA	NA	NA	NA	NA	NA	NA	NA	NA	NA	704	705	3.87562e-05	758	759	4.20698e-05	NA	NA	NA	NA	NA	NA	NA	NA	NA	68	69	2.10425e-06	3214	3215
FVFVSINL	TTCGTGTTCGTAAGTATCAATCTA	Pool 13	2766	2767	0.000299476	2566	2567	0.000136583	1544	1545	2.5188e-05	5166	5167	8.36368e-05	NA	NA	NA	NA	NA	NA	NA	NA	NA	NA	NA	NA	NA	NA	NA	8386	8387	0.000461061	23236	23237	0.00128798	NA	NA	NA	NA	NA	NA	NA	NA	NA	3206	3207	9.78019e-05	5348	5349
FVFWPFSL	TTTGTATTCTGGCCCTTTTCGCTT	Pool 13	2314	2315	0.000250556	1454	1455	7.74165e-05	276	277	4.5159e-06	2414	2415	3.90909e-05	NA	NA	NA	NA	NA	NA	NA	NA	NA	NA	NA	NA	NA	NA	NA	6504	6505	0.000357601	12094	12095	0.000670401	NA	NA	NA	NA	NA	NA	NA	NA	NA	318	319	9.72835e-06	1243	1244
FVGWYNGL	TTCGTCGGATGGTATAACGGCTTG	Pool 13	113	114	1.23384e-05	86	87	4.62903e-06	NA	1	1.63029e-08	NA	1	1.61867e-08	NA	NA	NA	NA	NA	NA	NA	NA	NA	NA	NA	NA	NA	NA	NA	304	305	1.67669e-05	518	519	2.87671e-05	NA	NA	NA	NA	NA	NA	NA	NA	NA	434	435	1.32659e-05	NA	1
FVHNFSRI	TTTGTCCATAACTTCAGTAGAATA	Pool 13	28	29	3.13871e-06	4	5	2.66036e-07	8	9	1.46726e-07	8	9	1.45681e-07	NA	NA	NA	NA	NA	NA	NA	NA	NA	NA	NA	NA	NA	NA	NA	78	79	4.34289e-06	70	71	3.93538e-06	NA	NA	NA	NA	NA	NA	NA	NA	NA	NA	1	3.04964e-08	6	7
FVHSWTNL	TTTGTCCACTCTTGGACGAACCTA	Pool 13	172	173	1.8724e-05	454	455	2.42093e-05	136	137	2.23349e-06	6036	6037	9.77193e-05	NA	NA	NA	NA	NA	NA	NA	NA	NA	NA	NA	NA	NA	NA	NA	550	551	3.02903e-05	556	557	3.08734e-05	NA	NA	NA	NA	NA	NA	NA	NA	NA	340	341	1.03993e-05	51	52
FVIHFFEV	TTTGTAATACACTTCTTTGAGGTG	Pool 13	61	62	6.71035e-06	8	9	4.78865e-07	NA	1	1.63029e-08	8	9	1.45681e-07	NA	NA	NA	NA	NA	NA	NA	NA	NA	NA	NA	NA	NA	NA	NA	230	231	1.26988e-05	144	145	8.03705e-06	NA	NA	NA	NA	NA	NA	NA	NA	NA	1	2	6.09928e-08	30	31
FVIIFQNL	TTTGTAATTATCTTCCAAAACTTA	Pool 13	861	862	9.32955e-05	444	445	2.36772e-05	506	507	8.26556e-06	952	953	1.5426e-05	NA	NA	NA	NA	NA	NA	NA	NA	NA	NA	NA	NA	NA	NA	NA	2120	2121	0.000116598	1966	1967	0.000109027	NA	NA	NA	NA	NA	NA	NA	NA	NA	10391	10392	0.000316918	452	453
FVKSYENL	TTTGTAAAGAGCTACGAGAATCTG	Pool 13	226	227	2.45685e-05	98	99	5.26751e-06	262	263	4.28766e-06	2	3	4.85602e-08	NA	NA	NA	NA	NA	NA	NA	NA	NA	NA	NA	NA	NA	NA	NA	592	593	3.25992e-05	822	823	4.56172e-05	NA	NA	NA	NA	NA	NA	NA	NA	NA	12	13	3.96453e-07	104	105
FVLCHGLL	TTCGTCCTCTGCCACGGGTTGTTG	Pool 13	433	434	4.69725e-05	724	725	3.85752e-05	48	49	7.98841e-07	12	13	2.10427e-07	NA	NA	NA	NA	NA	NA	NA	NA	NA	NA	NA	NA	NA	NA	NA	1010	1011	5.5578e-05	700	701	3.8855e-05	NA	NA	NA	NA	NA	NA	NA	NA	NA	380	381	1.16191e-05	107	108
FVMKYNLM	TTTGTCATGAAGTATAACCTTATG	Pool 13	172	173	1.8724e-05	30	31	1.64942e-06	20	21	3.42361e-07	106	107	1.73198e-06	NA	NA	NA	NA	NA	NA	NA	NA	NA	NA	NA	NA	NA	NA	NA	484	485	2.66621e-05	700	701	3.8855e-05	NA	NA	NA	NA	NA	NA	NA	NA	NA	46	47	1.43333e-06	221	222
FVPKFAGL	TTTGTGCCAAAATTCGCGGGCTTA	Pool 13	209	210	2.27286e-05	778	779	4.14484e-05	16	17	2.77149e-07	4	5	8.09336e-08	NA	NA	NA	NA	NA	NA	NA	NA	NA	NA	NA	NA	NA	NA	NA	400	401	2.20443e-05	420	421	2.33352e-05	NA	NA	NA	NA	NA	NA	NA	NA	NA	59	60	1.82978e-06	102	103
FVQCYHEL	TTTGTCCAGTGCTACCACGAGCTG	Pool 13	41	42	4.54572e-06	NA	1	5.32072e-08	54	55	8.96658e-07	NA	1	1.61867e-08	NA	NA	NA	NA	NA	NA	NA	NA	NA	NA	NA	NA	NA	NA	NA	90	91	5.00257e-06	134	135	7.48277e-06	NA	NA	NA	NA	NA	NA	NA	NA	NA	2	3	9.14892e-08	4	5
FVRVWVEL	TTCGTTCGGGTGTGGGTAGAACTA	Pool 13	12	13	1.40701e-06	14	15	7.98108e-07	NA	1	1.63029e-08	NA	1	1.61867e-08	NA	NA	NA	NA	NA	NA	NA	NA	NA	NA	NA	NA	NA	NA	NA	66	67	3.68321e-06	98	99	5.48737e-06	NA	NA	NA	NA	NA	NA	NA	NA	NA	51	52	1.58581e-06	NA	1
FVTIFGNI	TTTGTTACGATCTTTGGAAATATA	Pool 13	2576	2577	0.000278912	3220	3221	0.00017138	2090	2091	3.40893e-05	7326	7327	0.0001186	NA	NA	NA	NA	NA	NA	NA	NA	NA	NA	NA	NA	NA	NA	NA	10442	10443	0.000574086	8250	8251	0.000457336	NA	NA	NA	NA	NA	NA	NA	NA	NA	2231	2232	6.80679e-05	3223	3224
FVVPRFKL	TTCGTAGTCCCTCGATTTAAGCTT	Pool 13	240	241	2.60838e-05	62	63	3.35205e-06	644	645	1.05154e-05	74	75	1.214e-06	NA	NA	NA	NA	NA	NA	NA	NA	NA	NA	NA	NA	NA	NA	NA	498	499	2.74317e-05	332	333	1.84575e-05	NA	NA	NA	NA	NA	NA	NA	NA	NA	58	59	1.79929e-06	87	88
FVVVFAVL	TTTGTGGTAGTGTTCGCCGTTTTA	Pool 13	2424	2425	0.000262461	2238	2239	0.000119131	4644	4645	7.57269e-05	27668	27669	0.000447871	NA	NA	NA	NA	NA	NA	NA	NA	NA	NA	NA	NA	NA	NA	NA	7258	7259	0.000399051	4632	4633	0.000256798	NA	NA	NA	NA	NA	NA	NA	NA	NA	4888	4889	0.000149097	66150	66151
FWFYNYGL	TTTTGGTTTTATAACTACGGACTT	Pool 13	154	155	1.67759e-05	322	323	1.71859e-05	88	89	1.45096e-06	812	813	1.31598e-05	NA	NA	NA	NA	NA	NA	NA	NA	NA	NA	NA	NA	NA	NA	NA	554	555	3.05102e-05	1062	1063	5.89199e-05	NA	NA	NA	NA	NA	NA	NA	NA	NA	11	12	3.65957e-07	205	206
FWYDMAAL	TTCTGGTATGATATGGCGGCTTTG	Pool 13	24	25	2.70579e-06	2	3	1.59622e-07	2	3	4.89086e-08	64	65	1.05214e-06	NA	NA	NA	NA	NA	NA	NA	NA	NA	NA	NA	NA	NA	NA	NA	222	223	1.2259e-05	176	177	9.81075e-06	NA	NA	NA	NA	NA	NA	NA	NA	NA	35	36	1.09787e-06	7	8
FYFAFVTL	TTTTACTTCGCTTTCGTAACACTG	Pool 13	3116	3117	0.000337357	1352	1353	7.19893e-05	1030	1031	1.68083e-05	20814	20815	0.000336927	NA	NA	NA	NA	NA	NA	NA	NA	NA	NA	NA	NA	NA	NA	NA	4814	4815	0.000264696	7018	7019	0.000389049	NA	NA	NA	NA	NA	NA	NA	NA	NA	3830	3831	0.000116832	608	609
FYFRGYGL	TTCTACTTTCGAGGTTACGGGCTG	Pool 13	575	576	6.23413e-05	1612	1613	8.58232e-05	510	511	8.33077e-06	6478	6479	0.000104874	NA	NA	NA	NA	NA	NA	NA	NA	NA	NA	NA	NA	NA	NA	NA	1848	1849	0.000101646	1820	1821	0.000100934	NA	NA	NA	NA	NA	NA	NA	NA	NA	1247	1248	3.80595e-05	302	303
FYKFVPLL	TTCTATAAATTCGTGCCTCTTCTC	Pool 13	751	752	8.13901e-05	258	259	1.37807e-05	84	85	1.38574e-06	196	197	3.18879e-06	NA	NA	NA	NA	NA	NA	NA	NA	NA	NA	NA	NA	NA	NA	NA	1776	1777	9.76876e-05	3872	3873	0.000214672	NA	NA	NA	NA	NA	NA	NA	NA	NA	21	22	6.70921e-07	80	81
FYNFRGLL	TTCTACAACTTCAGGGGTCTCCTA	Pool 13	723	724	7.83596e-05	294	295	1.56961e-05	502	503	8.20035e-06	5032	5033	8.14678e-05	NA	NA	NA	NA	NA	NA	NA	NA	NA	NA	NA	NA	NA	NA	NA	3028	3029	0.000166514	1344	1345	7.45506e-05	NA	NA	NA	NA	NA	NA	NA	NA	NA	354	355	1.08262e-05	259	260
FYNTFTAL	TTTTACAACACGTTCACTGCGTTA	Pool 13	190	191	2.06722e-05	72	73	3.88412e-06	54	55	8.96658e-07	10	11	1.78054e-07	NA	NA	NA	NA	NA	NA	NA	NA	NA	NA	NA	NA	NA	NA	NA	720	721	3.96358e-05	466	467	2.58849e-05	NA	NA	NA	NA	NA	NA	NA	NA	NA	19	20	6.09928e-07	2	3
FYPQYGAL	TTTTATCCGCAGTATGGGGCACTC	Pool 13	531	532	5.75791e-05	1014	1015	5.40053e-05	90	91	1.48356e-06	748	749	1.21239e-05	NA	NA	NA	NA	NA	NA	NA	NA	NA	NA	NA	NA	NA	NA	NA	1602	1603	8.81222e-05	2322	2323	0.000128759	NA	NA	NA	NA	NA	NA	NA	NA	NA	96	97	2.95815e-06	128	129
FYRTWTHL	TTTTATCGAACCTGGACCCACTTG	Pool 13	851	852	9.22132e-05	358	359	1.91014e-05	1118	1119	1.82429e-05	900	901	1.45842e-05	NA	NA	NA	NA	NA	NA	NA	NA	NA	NA	NA	NA	NA	NA	NA	2264	2265	0.000124515	3892	3893	0.000215781	NA	NA	NA	NA	NA	NA	NA	NA	NA	2765	2766	8.4353e-05	215	216
FYTLYENL	TTCTACACACTATACGAAAATTTA	Pool 13	63	64	6.92681e-06	2	3	1.59622e-07	38	39	6.35812e-07	NA	1	1.61867e-08	NA	NA	NA	NA	NA	NA	NA	NA	NA	NA	NA	NA	NA	NA	NA	172	173	9.51038e-06	380	381	2.11181e-05	NA	NA	NA	NA	NA	NA	NA	NA	NA	NA	1	3.04964e-08	10	11
FYYMAVSL	TTCTATTACATGGCAGTAAGCCTC	Pool 13	305	306	3.31188e-05	118	119	6.33166e-06	436	437	7.12436e-06	294	295	4.77508e-06	NA	NA	NA	NA	NA	NA	NA	NA	NA	NA	NA	NA	NA	NA	NA	468	469	2.57825e-05	328	329	1.82358e-05	NA	NA	NA	NA	NA	NA	NA	NA	NA	12	13	3.96453e-07	343	344
GAIRFFAF	GGGGCCATCCGATTCTTTGCCTTC	Pool 13	3292	3293	0.000356406	3748	3749	0.000199474	1618	1619	2.63944e-05	9732	9733	0.000157545	NA	NA	NA	NA	NA	NA	NA	NA	NA	NA	NA	NA	NA	NA	NA	6678	6679	0.000367167	7452	7453	0.000413105	NA	NA	NA	NA	NA	NA	NA	NA	NA	13431	13432	0.000409628	3964	3965
GALLFSKL	GGCGCTCTATTATTTTCGAAGCTA	Pool 13	119	120	1.29878e-05	62	63	3.35205e-06	230	231	3.76597e-06	8	9	1.45681e-07	NA	NA	NA	NA	NA	NA	NA	NA	NA	NA	NA	NA	NA	NA	NA	362	363	1.99553e-05	434	435	2.41112e-05	NA	NA	NA	NA	NA	NA	NA	NA	NA	40	41	1.25035e-06	41	42
GALVFQAL	GGTGCTTTGGTCTTCCAAGCGCTC	Pool 13	276	277	2.99801e-05	196	197	1.04818e-05	274	275	4.48329e-06	128	129	2.08809e-06	NA	NA	NA	NA	NA	NA	NA	NA	NA	NA	NA	NA	NA	NA	NA	758	759	4.17247e-05	870	871	4.82777e-05	NA	NA	NA	NA	NA	NA	NA	NA	NA	649	650	1.98227e-05	48	49
GAPGFINL	GGTGCGCCTGGTTTTATTAACCTA	Pool 13	3918	3919	0.000424159	68960	68961	0.00366922	7252	7253	0.000118245	131250	131251	0.00212452	NA	NA	NA	NA	NA	NA	NA	NA	NA	NA	NA	NA	NA	NA	NA	12088	12089	0.000664572	9932	9933	0.000550566	NA	NA	NA	NA	NA	NA	NA	NA	NA	11153	11154	0.000340157	12703	12704
GASSFFPL	GGCGCATCATCATTCTTTCCCTTA	Pool 13	693	694	7.51126e-05	1204	1205	6.41147e-05	696	697	1.13631e-05	206	207	3.35065e-06	NA	NA	NA	NA	NA	NA	NA	NA	NA	NA	NA	NA	NA	NA	NA	3016	3017	0.000165854	4120	4121	0.000228419	NA	NA	NA	NA	NA	NA	NA	NA	NA	112	113	3.44609e-06	65	66
GAYLYSNS	GGAGCTTATCTTTACTCGAATTCC	Pool 13	1199	1200	0.000129878	364	365	1.94206e-05	86	87	1.41835e-06	30	31	5.01789e-07	NA	NA	NA	NA	NA	NA	NA	NA	NA	NA	NA	NA	NA	NA	NA	720	721	3.96358e-05	1312	1313	7.27769e-05	NA	NA	NA	NA	NA	NA	NA	NA	NA	124	125	3.81205e-06	46	47
GFEYINPL	GGCTTTGAGTACATAAACCCACTA	Pool 13	138	139	1.50442e-05	16	17	9.04522e-07	4	5	8.15144e-08	826	827	1.33864e-05	NA	NA	NA	NA	NA	NA	NA	NA	NA	NA	NA	NA	NA	NA	NA	952	953	5.23896e-05	534	535	2.9654e-05	NA	NA	NA	NA	NA	NA	NA	NA	NA	96	97	2.95815e-06	68	69
GFFRMPQL	GGATTCTTCAGAATGCCGCAACTG	Pool 13	541	542	5.86615e-05	1922	1923	0.000102317	322	323	5.26583e-06	8084	8085	0.00013087	NA	NA	NA	NA	NA	NA	NA	NA	NA	NA	NA	NA	NA	NA	NA	1666	1667	9.16405e-05	1502	1503	8.33082e-05	NA	NA	NA	NA	NA	NA	NA	NA	NA	208	209	6.37375e-06	623	624
GFLAFTQL	GGATTCTTAGCGTTCACACAGCTA	Pool 13	525	526	5.69298e-05	610	611	3.25096e-05	22	23	3.74966e-07	294	295	4.77508e-06	NA	NA	NA	NA	NA	NA	NA	NA	NA	NA	NA	NA	NA	NA	NA	1328	1329	7.30595e-05	1072	1073	5.94742e-05	NA	NA	NA	NA	NA	NA	NA	NA	NA	10	11	3.3546e-07	61	62
GFRNFLLL	GGATTCCGAAATTTCTTGCTTCTC	Pool 13	601	602	6.51553e-05	2348	2349	0.000124984	20	21	3.42361e-07	14	15	2.42801e-07	NA	NA	NA	NA	NA	NA	NA	NA	NA	NA	NA	NA	NA	NA	NA	1180	1181	6.49235e-05	892	893	4.94972e-05	NA	NA	NA	NA	NA	NA	NA	NA	NA	114	115	3.50708e-06	36	37
GFSSYSSL	GGGTTCTCATCTTACAGCTCACTT	Pool 13	819	820	8.87498e-05	98	99	5.26751e-06	12	13	2.11937e-07	40	41	6.63656e-07	NA	NA	NA	NA	NA	NA	NA	NA	NA	NA	NA	NA	NA	NA	NA	1038	1039	5.71173e-05	604	605	3.35339e-05	NA	NA	NA	NA	NA	NA	NA	NA	NA	46	47	1.43333e-06	61	62
GFVHWFPL	GGATTCGTCCACTGGTTTCCGTTA	Pool 13	10209	10210	0.00110504	5194	5195	0.000276411	12108	12109	0.000197412	9788	9789	0.000158452	NA	NA	NA	NA	NA	NA	NA	NA	NA	NA	NA	NA	NA	NA	NA	16002	16003	0.000879738	30456	30457	0.00168817	NA	NA	NA	NA	NA	NA	NA	NA	NA	10336	10337	0.000315241	19900	19901
GGFSYADV	GGAGGCTTTAGCTATGCCGATGTC	Pool 13	217	218	2.35945e-05	440	441	2.34644e-05	502	503	8.20035e-06	568	569	9.21025e-06	NA	NA	NA	NA	NA	NA	NA	NA	NA	NA	NA	NA	NA	NA	NA	1110	1111	6.10753e-05	956	957	5.30446e-05	NA	NA	NA	NA	NA	NA	NA	NA	NA	159	160	4.87942e-06	190	191
GGFVKFLL	GGTGGCTTCGTAAAATTCCTGCTT	Pool 13	1381	1382	0.000149576	560	561	2.98492e-05	2574	2575	4.19799e-05	342	343	5.55205e-06	NA	NA	NA	NA	NA	NA	NA	NA	NA	NA	NA	NA	NA	NA	NA	3698	3699	0.000203346	2478	2479	0.000137406	NA	NA	NA	NA	NA	NA	NA	NA	NA	85	86	2.62269e-06	624	625
GGFVYRGV	GGCGGGTTTGTCTACCGCGGCGTA	Pool 13	36	37	4.00456e-06	NA	1	5.32072e-08	4	5	8.15144e-08	NA	1	1.61867e-08	NA	NA	NA	NA	NA	NA	NA	NA	NA	NA	NA	NA	NA	NA	NA	208	209	1.14894e-05	NA	1	5.5428e-08	NA	NA	NA	NA	NA	NA	NA	NA	NA	NA	1	3.04964e-08	13	14
GGITFFPV	GGAGGAATCACGTTCTTCCCCGTT	Pool 13	704	705	7.63032e-05	2100	2101	0.000111788	508	509	8.29817e-06	1602	1603	2.59473e-05	NA	NA	NA	NA	NA	NA	NA	NA	NA	NA	NA	NA	NA	NA	NA	1744	1745	9.59284e-05	1490	1491	8.26431e-05	NA	NA	NA	NA	NA	NA	NA	NA	NA	1753	1754	5.34907e-05	78	79
GGMAFILL	GGTGGGATGGCGTTCATTCTCCTG	Pool 13	503	504	5.45487e-05	246	247	1.31422e-05	6	7	1.1412e-07	14	15	2.42801e-07	NA	NA	NA	NA	NA	NA	NA	NA	NA	NA	NA	NA	NA	NA	NA	866	867	4.76619e-05	240	241	1.33581e-05	NA	NA	NA	NA	NA	NA	NA	NA	NA	17	18	5.48935e-07	NA	1
GGPFFFCL	GGCGGCCCGTTCTTCTTCTGTCTG	Pool 13	567	568	6.14755e-05	72	73	3.88412e-06	88	89	1.45096e-06	274	275	4.45135e-06	NA	NA	NA	NA	NA	NA	NA	NA	NA	NA	NA	NA	NA	NA	NA	1524	1525	8.38343e-05	964	965	5.3488e-05	NA	NA	NA	NA	NA	NA	NA	NA	NA	4	5	1.52482e-07	217	218
GGWSFTNF	GGAGGTTGGTCCTTCACGAACTTT	Pool 13	403	404	4.37255e-05	14	15	7.98108e-07	NA	1	1.63029e-08	2448	2449	3.96413e-05	NA	NA	NA	NA	NA	NA	NA	NA	NA	NA	NA	NA	NA	NA	NA	540	541	2.97406e-05	442	443	2.45546e-05	NA	NA	NA	NA	NA	NA	NA	NA	NA	2	3	9.14892e-08	25	26
GGYFLPRL	GGCGGCTATTTTCTCCCGAGACTT	Pool 13	2466	2467	0.000267007	2852	2853	0.0001518	270	271	4.41808e-06	628	629	1.01815e-05	NA	NA	NA	NA	NA	NA	NA	NA	NA	NA	NA	NA	NA	NA	NA	2886	2887	0.000158708	3684	3685	0.000204252	NA	NA	NA	NA	NA	NA	NA	NA	NA	176	177	5.39786e-06	776	777
GHLLFPGL	GGGCATCTGCTCTTCCCTGGGCTC	Pool 13	8860	8861	0.000959039	8670	8671	0.00046136	2618	2619	4.26972e-05	3908	3909	6.32739e-05	NA	NA	NA	NA	NA	NA	NA	NA	NA	NA	NA	NA	NA	NA	NA	22222	22223	0.00122167	18606	18607	0.00103135	NA	NA	NA	NA	NA	NA	NA	NA	NA	2421	2422	7.38623e-05	8195	8196
GHMLFFLL	GGCCATATGCTATTCTTCTTGCTT	Pool 13	928	929	0.000100547	582	583	3.10198e-05	212	213	3.47251e-06	162	163	2.63844e-06	NA	NA	NA	NA	NA	NA	NA	NA	NA	NA	NA	NA	NA	NA	NA	2730	2731	0.000150132	3490	3491	0.000193499	NA	NA	NA	NA	NA	NA	NA	NA	NA	156	157	4.78793e-06	251	252
GHYPFAGI	GGTCACTATCCTTTTGCTGGCATC	Pool 13	2085	2086	0.000225771	1494	1495	7.95448e-05	852	853	1.39064e-05	1636	1637	2.64977e-05	NA	NA	NA	NA	NA	NA	NA	NA	NA	NA	NA	NA	NA	NA	NA	5446	5447	0.00029944	6074	6075	0.000336725	NA	NA	NA	NA	NA	NA	NA	NA	NA	1095	1096	3.3424e-05	5051	5052
GIFFCMAL	GGAATTTTCTTCTGCATGGCGCTT	Pool 13	3299	3300	0.000357164	1440	1441	7.66716e-05	294	295	4.80935e-06	6722	6723	0.000108823	NA	NA	NA	NA	NA	NA	NA	NA	NA	NA	NA	NA	NA	NA	NA	6700	6701	0.000368376	5056	5057	0.000280299	NA	NA	NA	NA	NA	NA	NA	NA	NA	1611	1612	4.91602e-05	992	993
GIFNRYNV	GGCATCTTTAACAGATATAATGTG	Pool 13	30	31	3.35518e-06	18	19	1.01094e-06	408	409	6.66788e-06	250	251	4.06287e-06	NA	NA	NA	NA	NA	NA	NA	NA	NA	NA	NA	NA	NA	NA	NA	232	233	1.28088e-05	130	131	7.26106e-06	NA	NA	NA	NA	NA	NA	NA	NA	NA	8	9	2.74468e-07	13	14
GIIQFIKL	GGGATAATTCAATTTATCAAACTC	Pool 13	274	275	2.97637e-05	124	125	6.6509e-06	150	151	2.46174e-06	40	41	6.63656e-07	NA	NA	NA	NA	NA	NA	NA	NA	NA	NA	NA	NA	NA	NA	NA	682	683	3.75468e-05	1098	1099	6.09153e-05	NA	NA	NA	NA	NA	NA	NA	NA	NA	NA	1	3.04964e-08	360	361
GLSHFAAL	GGGCTAAGCCATTTTGCAGCATTG	Pool 13	237	238	2.57591e-05	52	53	2.81998e-06	8	9	1.46726e-07	4	5	8.09336e-08	NA	NA	NA	NA	NA	NA	NA	NA	NA	NA	NA	NA	NA	NA	NA	624	625	3.43583e-05	316	317	1.75707e-05	NA	NA	NA	NA	NA	NA	NA	NA	NA	11	12	3.65957e-07	5	6
GLYYFLKI	GGTCTCTACTATTTCTTGAAAATT	Pool 13	1330	1331	0.000144056	3834	3835	0.00020405	252	253	4.12463e-06	6388	6389	0.000103417	NA	NA	NA	NA	NA	NA	NA	NA	NA	NA	NA	NA	NA	NA	NA	3338	3339	0.000183556	3058	3059	0.000169554	NA	NA	NA	NA	NA	NA	NA	NA	NA	3999	4000	0.000121986	2133	2134
GMFKYEEI	GGAATGTTCAAATACGAGGAGATT	Pool 13	570	571	6.18002e-05	932	933	4.96423e-05	140	141	2.29871e-06	560	561	9.08075e-06	NA	NA	NA	NA	NA	NA	NA	NA	NA	NA	NA	NA	NA	NA	NA	1322	1323	7.27297e-05	1464	1465	8.1202e-05	NA	NA	NA	NA	NA	NA	NA	NA	NA	115	116	3.53758e-06	464	465
GMFLQLYL	GGAATGTTTCTGCAACTCTATTTG	Pool 13	451	452	4.89206e-05	258	259	1.37807e-05	106	107	1.74441e-06	84	85	1.37587e-06	NA	NA	NA	NA	NA	NA	NA	NA	NA	NA	NA	NA	NA	NA	NA	1182	1183	6.50334e-05	1718	1719	9.52807e-05	NA	NA	NA	NA	NA	NA	NA	NA	NA	20	21	6.40424e-07	27	28
GMFSFTGL	GGCATGTTCTCATTCACCGGATTG	Pool 13	322	323	3.49588e-05	520	521	2.77209e-05	1614	1615	2.63292e-05	1570	1571	2.54293e-05	NA	NA	NA	NA	NA	NA	NA	NA	NA	NA	NA	NA	NA	NA	NA	814	815	4.48032e-05	1704	1705	9.45047e-05	NA	NA	NA	NA	NA	NA	NA	NA	NA	52	53	1.61631e-06	1648	1649
GMVVFWNL	GGCATGGTGGTCTTTTGGAATTTA	Pool 13	113	114	1.23384e-05	32	33	1.75584e-06	18	19	3.09755e-07	28	29	4.69415e-07	NA	NA	NA	NA	NA	NA	NA	NA	NA	NA	NA	NA	NA	NA	NA	434	435	2.39134e-05	582	583	3.23145e-05	NA	NA	NA	NA	NA	NA	NA	NA	NA	2	3	9.14892e-08	7	8
GNFELVSL	GGGAACTTTGAACTTGTCTCGCTC	Pool 13	73	74	8.00913e-06	6	7	3.7245e-07	38	39	6.35812e-07	NA	1	1.61867e-08	NA	NA	NA	NA	NA	NA	NA	NA	NA	NA	NA	NA	NA	NA	NA	176	177	9.73027e-06	72	73	4.04624e-06	NA	NA	NA	NA	NA	NA	NA	NA	NA	6	7	2.13475e-07	7	8
GNIVYTYV	GGAAATATAGTGTATACTTACGTA	Pool 13	193	194	2.09969e-05	242	243	1.29293e-05	18	19	3.09755e-07	60	61	9.8739e-07	NA	NA	NA	NA	NA	NA	NA	NA	NA	NA	NA	NA	NA	NA	NA	598	599	3.2929e-05	2022	2023	0.000112131	NA	NA	NA	NA	NA	NA	NA	NA	NA	13	14	4.26949e-07	163	164
GNTYFAFL	GGTAATACTTACTTCGCATTCTTG	Pool 13	571	572	6.19084e-05	274	275	1.4632e-05	124	125	2.03786e-06	56	57	9.22643e-07	NA	NA	NA	NA	NA	NA	NA	NA	NA	NA	NA	NA	NA	NA	NA	1816	1817	9.98865e-05	1262	1263	7.00055e-05	NA	NA	NA	NA	NA	NA	NA	NA	NA	815	816	2.48851e-05	155	156
GNYFWVLL	GGAAACTACTTCTGGGTTCTATTG	Pool 13	142	143	1.54771e-05	24	25	1.33018e-06	NA	1	1.63029e-08	100	101	1.63486e-06	NA	NA	NA	NA	NA	NA	NA	NA	NA	NA	NA	NA	NA	NA	NA	372	373	2.0505e-05	48	49	2.71597e-06	NA	NA	NA	NA	NA	NA	NA	NA	NA	109	110	3.3546e-06	9	10
GQFDYALV	GGTCAGTTCGACTACGCACTAGTA	Pool 13	436	437	4.72972e-05	814	815	4.33639e-05	16	17	2.77149e-07	756	757	1.22534e-05	NA	NA	NA	NA	NA	NA	NA	NA	NA	NA	NA	NA	NA	NA	NA	1658	1659	9.12007e-05	1086	1087	6.02502e-05	NA	NA	NA	NA	NA	NA	NA	NA	NA	26	27	8.23403e-07	1073	1074
GQFGFQRL	GGACAGTTTGGTTTCCAAAGACTT	Pool 13	150	151	1.6343e-05	10	11	5.85279e-07	2	3	4.89086e-08	30	31	5.01789e-07	NA	NA	NA	NA	NA	NA	NA	NA	NA	NA	NA	NA	NA	NA	NA	448	449	2.4683e-05	908	909	5.0384e-05	NA	NA	NA	NA	NA	NA	NA	NA	NA	4	5	1.52482e-07	NA	1
GQFLRVPL	GGACAATTTCTGCGCGTTCCTCTT	Pool 13	1197	1198	0.000129661	524	525	2.79338e-05	438	439	7.15696e-06	836	837	1.35483e-05	NA	NA	NA	NA	NA	NA	NA	NA	NA	NA	NA	NA	NA	NA	NA	3080	3081	0.000169373	2930	2931	0.000162459	NA	NA	NA	NA	NA	NA	NA	NA	NA	921	922	2.81177e-05	333	334
GQFSFAEV	GGCCAATTTTCGTTCGCCGAGGTA	Pool 13	44	45	4.87042e-06	32	33	1.75584e-06	NA	1	1.63029e-08	2	3	4.85602e-08	NA	NA	NA	NA	NA	NA	NA	NA	NA	NA	NA	NA	NA	NA	NA	186	187	1.028e-05	236	237	1.31364e-05	NA	NA	NA	NA	NA	NA	NA	NA	NA	8	9	2.74468e-07	6	7
GQYVCSPL	GGGCAATACGTCTGCAGCCCGTTA	Pool 13	441	442	4.78383e-05	694	695	3.6979e-05	54	55	8.96658e-07	650	651	1.05376e-05	NA	NA	NA	NA	NA	NA	NA	NA	NA	NA	NA	NA	NA	NA	NA	1106	1107	6.08554e-05	638	639	3.54185e-05	NA	NA	NA	NA	NA	NA	NA	NA	NA	220	221	6.7397e-06	258	259
GSAPFLFL	GGTTCGGCACCGTTTCTGTTTCTA	Pool 13	717	718	7.77102e-05	2994	2995	0.000159356	4516	4517	7.36401e-05	1046	1047	1.69475e-05	NA	NA	NA	NA	NA	NA	NA	NA	NA	NA	NA	NA	NA	NA	NA	2086	2087	0.000114729	2744	2745	0.00015215	NA	NA	NA	NA	NA	NA	NA	NA	NA	5837	5838	0.000178038	2585	2586
GSASFILL	GGGTCGGCGTCTTTCATCCTCTTG	Pool 13	670	671	7.26233e-05	150	151	8.03429e-06	16	17	2.77149e-07	108	109	1.76435e-06	NA	NA	NA	NA	NA	NA	NA	NA	NA	NA	NA	NA	NA	NA	NA	2244	2245	0.000123415	1774	1775	9.83846e-05	NA	NA	NA	NA	NA	NA	NA	NA	NA	8	9	2.74468e-07	167	168
GSFFSLLL	GGTTCATTCTTCAGCTTGCTATTG	Pool 13	260	261	2.82484e-05	1260	1261	6.70943e-05	516	517	8.42859e-06	448	449	7.26784e-06	NA	NA	NA	NA	NA	NA	NA	NA	NA	NA	NA	NA	NA	NA	NA	946	947	5.20597e-05	610	611	3.38665e-05	NA	NA	NA	NA	NA	NA	NA	NA	NA	418	419	1.2778e-05	171	172
GSFFTLNL	GGCTCATTCTTTACATTAAACTTG	Pool 13	400	401	4.34008e-05	4258	4259	0.000226609	9814	9815	0.000160013	77354	77355	0.00125212	NA	NA	NA	NA	NA	NA	NA	NA	NA	NA	NA	NA	NA	NA	NA	1244	1245	6.84418e-05	1428	1429	7.92065e-05	NA	NA	NA	NA	NA	NA	NA	NA	NA	2051	2052	6.25786e-05	1549	1550
GSFHLIRL	GGGAGTTTTCACCTAATTCGTTTA	Pool 13	539	540	5.8445e-05	258	259	1.37807e-05	92	93	1.51617e-06	1202	1203	1.94726e-05	NA	NA	NA	NA	NA	NA	NA	NA	NA	NA	NA	NA	NA	NA	NA	1142	1143	6.28345e-05	1328	1329	7.36638e-05	NA	NA	NA	NA	NA	NA	NA	NA	NA	307	308	9.39289e-06	409	410
GSFLAANM	GGGTCTTTCCTTGCTGCTAATATG	Pool 13	3027	3028	0.000327725	1448	1449	7.70972e-05	6120	6121	9.97899e-05	2420	2421	3.91881e-05	NA	NA	NA	NA	NA	NA	NA	NA	NA	NA	NA	NA	NA	NA	NA	2880	2881	0.000158378	2536	2537	0.000140621	NA	NA	NA	NA	NA	NA	NA	NA	NA	54749	54750	0.00166968	1144	1145
GSFPYDSV	GGTTCGTTTCCGTATGACTCTGTC	Pool 13	434	435	4.70807e-05	334	335	1.78244e-05	46	47	7.66235e-07	354	355	5.74629e-06	NA	NA	NA	NA	NA	NA	NA	NA	NA	NA	NA	NA	NA	NA	NA	4232	4233	0.000232702	702	703	3.89659e-05	NA	NA	NA	NA	NA	NA	NA	NA	NA	252	253	7.71559e-06	258	259
GSFSMGML	GGGAGCTTCTCTATGGGTATGTTG	Pool 13	313	314	3.39847e-05	42	43	2.28791e-06	4	5	8.15144e-08	6	7	1.13307e-07	NA	NA	NA	NA	NA	NA	NA	NA	NA	NA	NA	NA	NA	NA	NA	610	611	3.35887e-05	1286	1287	7.13358e-05	NA	NA	NA	NA	NA	NA	NA	NA	NA	214	215	6.55672e-06	44	45
GSFVSGQL	GGTTCCTTTGTGTCGGGGCAACTA	Pool 13	308	309	3.34435e-05	182	183	9.73692e-06	102	103	1.6792e-06	20	21	3.39921e-07	NA	NA	NA	NA	NA	NA	NA	NA	NA	NA	NA	NA	NA	NA	NA	980	981	5.39288e-05	1070	1071	5.93633e-05	NA	NA	NA	NA	NA	NA	NA	NA	NA	179	180	5.48935e-06	124	125
GSGAFMYL	GGTTCCGGAGCCTTCATGTATTTG	Pool 13	1640	1641	0.000177608	10142	10143	0.000539681	106	107	1.74441e-06	94	95	1.53774e-06	NA	NA	NA	NA	NA	NA	NA	NA	NA	NA	NA	NA	NA	NA	NA	4806	4807	0.000264257	2882	2883	0.000159799	NA	NA	NA	NA	NA	NA	NA	NA	NA	839	840	2.5617e-05	9	10
GSGMFPPL	GGGAGTGGGATGTTCCCACCCCTT	Pool 13	193	194	2.09969e-05	36	37	1.96867e-06	88	89	1.45096e-06	12	13	2.10427e-07	NA	NA	NA	NA	NA	NA	NA	NA	NA	NA	NA	NA	NA	NA	NA	504	505	2.77615e-05	454	455	2.52197e-05	NA	NA	NA	NA	NA	NA	NA	NA	NA	34	35	1.06737e-06	38	39
GSIVFTFI	GGATCAATAGTGTTTACCTTTATC	Pool 13	3579	3580	0.000387469	626	627	3.33609e-05	172	173	2.8204e-06	1668	1669	2.70156e-05	NA	NA	NA	NA	NA	NA	NA	NA	NA	NA	NA	NA	NA	NA	NA	6418	6419	0.000352874	4894	4895	0.00027132	NA	NA	NA	NA	NA	NA	NA	NA	NA	260	261	7.95956e-06	947	948
GSLPFFLL	GGCAGTCTCCCATTCTTCTTACTA	Pool 13	535	536	5.80121e-05	428	429	2.28259e-05	1044	1045	1.70365e-05	184	185	2.99454e-06	NA	NA	NA	NA	NA	NA	NA	NA	NA	NA	NA	NA	NA	NA	NA	1168	1169	6.42638e-05	2928	2929	0.000162348	NA	NA	NA	NA	NA	NA	NA	NA	NA	11900	11901	0.000362938	627	628
GSQYFIFL	GGCTCCCAATATTTCATATTCTTA	Pool 13	26508	26509	0.00286911	606	607	3.22968e-05	192	193	3.14646e-06	970	971	1.57173e-05	NA	NA	NA	NA	NA	NA	NA	NA	NA	NA	NA	NA	NA	NA	NA	4348	4349	0.000239079	4062	4063	0.000225204	NA	NA	NA	NA	NA	NA	NA	NA	NA	116	117	3.56808e-06	297	298
GSRFFKTL	GGGAGTAGGTTCTTTAAGACCCTA	Pool 13	1950	1951	0.00021116	532	533	2.83594e-05	328	329	5.36365e-06	922	923	1.49403e-05	NA	NA	NA	NA	NA	NA	NA	NA	NA	NA	NA	NA	NA	NA	NA	3864	3865	0.000212472	10700	10701	0.000593135	NA	NA	NA	NA	NA	NA	NA	NA	NA	1354	1355	4.13226e-05	520	521
GSSFFSAL	GGCAGCTCGTTCTTTAGCGCCTTG	Pool 13	149	150	1.62347e-05	196	197	1.04818e-05	30	31	5.05389e-07	108	109	1.76435e-06	NA	NA	NA	NA	NA	NA	NA	NA	NA	NA	NA	NA	NA	NA	NA	616	617	3.39185e-05	450	451	2.4998e-05	NA	NA	NA	NA	NA	NA	NA	NA	NA	5	6	1.82978e-07	44	45
GSYAMTEL	GGAAGTTATGCTATGACGGAATTG	Pool 13	616	617	6.67788e-05	100	101	5.37393e-06	32	33	5.37995e-07	NA	1	1.61867e-08	NA	NA	NA	NA	NA	NA	NA	NA	NA	NA	NA	NA	NA	NA	NA	888	889	4.88713e-05	2642	2643	0.000146496	NA	NA	NA	NA	NA	NA	NA	NA	NA	10	11	3.3546e-07	6	7
GSYFGYSL	GGGAGCTATTTTGGGTATTCACTC	Pool 13	847	848	9.17803e-05	1068	1069	5.68785e-05	566	567	9.24373e-06	468	469	7.59158e-06	NA	NA	NA	NA	NA	NA	NA	NA	NA	NA	NA	NA	NA	NA	NA	2920	2921	0.000160577	1544	1545	8.56362e-05	NA	NA	NA	NA	NA	NA	NA	NA	NA	87	88	2.68368e-06	1025	1026
GSYIMNYI	GGTTCATACATAATGAACTACATC	Pool 13	686	687	7.4355e-05	152	153	8.1407e-06	480	481	7.84169e-06	2962	2963	4.79613e-05	NA	NA	NA	NA	NA	NA	NA	NA	NA	NA	NA	NA	NA	NA	NA	1258	1259	6.92114e-05	1368	1369	7.58809e-05	NA	NA	NA	NA	NA	NA	NA	NA	NA	516	517	1.57666e-05	1202	1203
GSYIYLSM	GGCTCTTACATCTACCTATCGATG	Pool 13	109	110	1.19055e-05	54	55	2.9264e-06	46	47	7.66235e-07	2	3	4.85602e-08	NA	NA	NA	NA	NA	NA	NA	NA	NA	NA	NA	NA	NA	NA	NA	182	183	1.00601e-05	72	73	4.04624e-06	NA	NA	NA	NA	NA	NA	NA	NA	NA	NA	1	3.04964e-08	13	14
GSYWYFDV	GGATCGTATTGGTACTTCGATGTG	Pool 13	118	119	1.28795e-05	48	49	2.60715e-06	12	13	2.11937e-07	48	49	7.9315e-07	NA	NA	NA	NA	NA	NA	NA	NA	NA	NA	NA	NA	NA	NA	NA	242	243	1.33585e-05	428	429	2.37786e-05	NA	NA	NA	NA	NA	NA	NA	NA	NA	60	61	1.86028e-06	6	7
GTALYNNL	GGGACAGCGTTGTACAACAACTTG	Pool 13	340	341	3.69069e-05	214	215	1.14395e-05	76	77	1.25532e-06	100	101	1.63486e-06	NA	NA	NA	NA	NA	NA	NA	NA	NA	NA	NA	NA	NA	NA	NA	1120	1121	6.16251e-05	1502	1503	8.33082e-05	NA	NA	NA	NA	NA	NA	NA	NA	NA	7	8	2.43971e-07	82	83
GTILFMYL	GGGACGATTTTGTTTATGTATTTG	Pool 13	652	653	7.06751e-05	554	555	2.953e-05	110	111	1.80962e-06	140	141	2.28233e-06	NA	NA	NA	NA	NA	NA	NA	NA	NA	NA	NA	NA	NA	NA	NA	1750	1751	9.62583e-05	1486	1487	8.24214e-05	NA	NA	NA	NA	NA	NA	NA	NA	NA	128	129	3.93403e-06	190	191
GTISFFEI	GGAACGATAAGTTTCTTCGAGATA	Pool 13	241	242	2.6192e-05	174	175	9.31126e-06	652	653	1.06458e-05	2676	2677	4.33319e-05	NA	NA	NA	NA	NA	NA	NA	NA	NA	NA	NA	NA	NA	NA	NA	558	559	3.07301e-05	904	905	5.01623e-05	NA	NA	NA	NA	NA	NA	NA	NA	NA	16423	16424	0.000500873	53	54
GTLEFTLL	GGCACACTTGAATTTACACTCTTA	Pool 13	728	729	7.89007e-05	466	467	2.48478e-05	92	93	1.51617e-06	388	389	6.29664e-06	NA	NA	NA	NA	NA	NA	NA	NA	NA	NA	NA	NA	NA	NA	NA	1814	1815	9.97765e-05	1448	1449	8.03151e-05	NA	NA	NA	NA	NA	NA	NA	NA	NA	128	129	3.93403e-06	165	166
GTLIYMYM	GGAACACTTATATACATGTATATG	Pool 13	4584	4585	0.000496241	42	43	2.28791e-06	10	11	1.79332e-07	120	121	1.95859e-06	NA	NA	NA	NA	NA	NA	NA	NA	NA	NA	NA	NA	NA	NA	NA	1664	1665	9.15305e-05	924	925	5.12709e-05	NA	NA	NA	NA	NA	NA	NA	NA	NA	7	8	2.43971e-07	42	43
GTLNFTNV	GGAACTCTCAACTTTACCAATGTC	Pool 13	122	123	1.33125e-05	34	35	1.86225e-06	54	55	8.96658e-07	40	41	6.63656e-07	NA	NA	NA	NA	NA	NA	NA	NA	NA	NA	NA	NA	NA	NA	NA	432	433	2.38034e-05	324	325	1.80141e-05	NA	NA	NA	NA	NA	NA	NA	NA	NA	12	13	3.96453e-07	20	21
GTLTFMYI	GGCACCCTGACATTTATGTACATA	Pool 13	872	873	9.44861e-05	304	305	1.62282e-05	306	307	5.00498e-06	262	263	4.25711e-06	NA	NA	NA	NA	NA	NA	NA	NA	NA	NA	NA	NA	NA	NA	NA	3024	3025	0.000166294	1456	1457	8.07585e-05	NA	NA	NA	NA	NA	NA	NA	NA	NA	99	100	3.04964e-06	75	76
GTPRFFPL	GGGACGCCGCGGTTCTTCCCGCTT	Pool 13	NA	1	1.08231e-07	NA	1	5.32072e-08	NA	1	1.63029e-08	NA	1	1.61867e-08	NA	NA	NA	NA	NA	NA	NA	NA	NA	NA	NA	NA	NA	NA	NA	NA	1	5.49733e-08	NA	1	5.5428e-08	NA	NA	NA	NA	NA	NA	NA	NA	NA	NA	1	3.04964e-08	NA	1
GTYILQTL	GGAACTTACATATTACAAACGCTG	Pool 13	339	340	3.67987e-05	22	23	1.22377e-06	NA	1	1.63029e-08	4	5	8.09336e-08	NA	NA	NA	NA	NA	NA	NA	NA	NA	NA	NA	NA	NA	NA	NA	722	723	3.97457e-05	406	407	2.25592e-05	NA	NA	NA	NA	NA	NA	NA	NA	NA	4	5	1.52482e-07	NA	1
GTYKYLEV	GGGACGTACAAATACCTAGAAGTC	Pool 13	16944	16945	0.00183398	6598	6599	0.000351114	122	123	2.00525e-06	426	427	6.91173e-06	NA	NA	NA	NA	NA	NA	NA	NA	NA	NA	NA	NA	NA	NA	NA	5302	5303	0.000291523	17126	17127	0.000949315	NA	NA	NA	NA	NA	NA	NA	NA	NA	68	69	2.10425e-06	52015	52016
GVFVWTAL	GGGGTTTTCGTTTGGACAGCATTG	Pool 13	90	91	9.84906e-06	20	21	1.11735e-06	NA	1	1.63029e-08	8	9	1.45681e-07	NA	NA	NA	NA	NA	NA	NA	NA	NA	NA	NA	NA	NA	NA	NA	190	191	1.04999e-05	204	205	1.13627e-05	NA	NA	NA	NA	NA	NA	NA	NA	NA	NA	1	3.04964e-08	NA	1
GVIHFLEL	GGTGTAATACATTTTCTGGAACTG	Pool 13	2290	2291	0.000247958	650	651	3.46379e-05	274	275	4.48329e-06	1124	1125	1.82101e-05	NA	NA	NA	NA	NA	NA	NA	NA	NA	NA	NA	NA	NA	NA	NA	4354	4355	0.000239409	3310	3311	0.000183522	NA	NA	NA	NA	NA	NA	NA	NA	NA	212	213	6.49573e-06	739	740
GVILFLRL	GGCGTGATACTATTCCTCAGGTTA	Pool 13	256	257	2.78155e-05	144	145	7.71504e-06	16	17	2.77149e-07	12	13	2.10427e-07	NA	NA	NA	NA	NA	NA	NA	NA	NA	NA	NA	NA	NA	NA	NA	812	813	4.46933e-05	1270	1271	7.04489e-05	NA	NA	NA	NA	NA	NA	NA	NA	NA	60	61	1.86028e-06	43	44
GVMALANL	GGGGTGATGGCGCTGGCTAACCTA	Pool 13	119	120	1.29878e-05	2	3	1.59622e-07	12	13	2.11937e-07	NA	1	1.61867e-08	NA	NA	NA	NA	NA	NA	NA	NA	NA	NA	NA	NA	NA	NA	NA	194	195	1.07198e-05	114	115	6.37421e-06	NA	NA	NA	NA	NA	NA	NA	NA	NA	2	3	9.14892e-08	3	4
GVYGFLTF	GGCGTTTATGGATTCCTTACATTT	Pool 13	1665	1666	0.000180314	280	281	1.49512e-05	192	193	3.14646e-06	1228	1229	1.98935e-05	NA	NA	NA	NA	NA	NA	NA	NA	NA	NA	NA	NA	NA	NA	NA	2530	2531	0.000139137	2872	2873	0.000159245	NA	NA	NA	NA	NA	NA	NA	NA	NA	410	411	1.2534e-05	409	410
GVYHLSGL	GGCGTCTACCACTTGTCAGGGTTA	Pool 13	1862	1863	0.000201635	1184	1185	6.30505e-05	360	361	5.88534e-06	654	655	1.06023e-05	NA	NA	NA	NA	NA	NA	NA	NA	NA	NA	NA	NA	NA	NA	NA	4276	4277	0.000235121	3240	3241	0.000179642	NA	NA	NA	NA	NA	NA	NA	NA	NA	1995	1996	6.08708e-05	1677	1678
GVYSAAAL	GGGGTGTATAGTGCTGCCGCTCTG	Pool 13	780	781	8.45288e-05	312	313	1.66539e-05	110	111	1.80962e-06	912	913	1.47785e-05	NA	NA	NA	NA	NA	NA	NA	NA	NA	NA	NA	NA	NA	NA	NA	2236	2237	0.000122975	5330	5331	0.000295486	NA	NA	NA	NA	NA	NA	NA	NA	NA	73	74	2.25673e-06	318	319
GVYTHHPL	GGGGTGTACACCCACCATCCGTTG	Pool 13	353	354	3.83139e-05	3378	3379	0.000179787	NA	1	1.63029e-08	16	17	2.75174e-07	NA	NA	NA	NA	NA	NA	NA	NA	NA	NA	NA	NA	NA	NA	NA	592	593	3.25992e-05	490	491	2.72151e-05	NA	NA	NA	NA	NA	NA	NA	NA	NA	65	66	2.01276e-06	161	162
GYFQFRLV	GGGTACTTCCAGTTTCGGCTTGTT	Pool 13	4000	4001	0.000433034	1842	1843	9.80609e-05	844	845	1.37759e-05	5544	5545	8.97554e-05	NA	NA	NA	NA	NA	NA	NA	NA	NA	NA	NA	NA	NA	NA	NA	6460	6461	0.000355183	4566	4567	0.000253139	NA	NA	NA	NA	NA	NA	NA	NA	NA	1136	1137	3.46744e-05	1263	1264
GYQFLSQL	GGGTATCAATTCTTATCTCAACTA	Pool 13	1022	1023	0.000110721	282	283	1.50576e-05	24	25	4.07572e-07	104	105	1.69961e-06	NA	NA	NA	NA	NA	NA	NA	NA	NA	NA	NA	NA	NA	NA	NA	980	981	5.39288e-05	1014	1015	5.62594e-05	NA	NA	NA	NA	NA	NA	NA	NA	NA	2924	2925	8.92019e-05	255	256
GYRYYTCL	GGGTATCGGTATTACACATGTCTG	Pool 13	1764	1765	0.000191029	742	743	3.95329e-05	94	95	1.54877e-06	2742	2743	4.44002e-05	NA	NA	NA	NA	NA	NA	NA	NA	NA	NA	NA	NA	NA	NA	NA	11002	11003	0.000604871	19414	19415	0.00107613	NA	NA	NA	NA	NA	NA	NA	NA	NA	300	301	9.17941e-06	767	768
GYYFFIVL	GGATACTACTTCTTTATCGTATTA	Pool 13	1443	1444	0.000156286	780	781	4.15548e-05	308	309	5.03759e-06	1166	1167	1.88899e-05	NA	NA	NA	NA	NA	NA	NA	NA	NA	NA	NA	NA	NA	NA	NA	4084	4085	0.000224566	4066	4067	0.000225425	NA	NA	NA	NA	NA	NA	NA	NA	NA	1146	1147	3.49794e-05	535	536
HAEFFRNL	CACGCCGAATTCTTTCGCAACTTG	Pool 13	848	849	9.18885e-05	522	523	2.78274e-05	2736	2737	4.4621e-05	744	745	1.20591e-05	NA	NA	NA	NA	NA	NA	NA	NA	NA	NA	NA	NA	NA	NA	NA	2092	2093	0.000115059	1848	1849	0.000102486	NA	NA	NA	NA	NA	NA	NA	NA	NA	459	460	1.40283e-05	1318	1319
HAYTLRML	CATGCATACACGCTAAGGATGCTA	Pool 13	424	425	4.59984e-05	38	39	2.07508e-06	706	707	1.15261e-05	12	13	2.10427e-07	NA	NA	NA	NA	NA	NA	NA	NA	NA	NA	NA	NA	NA	NA	NA	1126	1127	6.19549e-05	2152	2153	0.000119336	NA	NA	NA	NA	NA	NA	NA	NA	NA	36	37	1.12837e-06	74	75
HAYYYCFI	CACGCGTATTATTATTGCTTCATC	Pool 13	2070	2071	0.000224147	1396	1397	7.43304e-05	780	781	1.27326e-05	402	403	6.52325e-06	NA	NA	NA	NA	NA	NA	NA	NA	NA	NA	NA	NA	NA	NA	NA	2860	2861	0.000157279	2522	2523	0.000139845	NA	NA	NA	NA	NA	NA	NA	NA	NA	108	109	3.32411e-06	8457	8458
HFFFSNPL	CACTTCTTCTTCAGCAACCCGTTG	Pool 13	444	445	4.8163e-05	770	771	4.10227e-05	94	95	1.54877e-06	50	51	8.25523e-07	NA	NA	NA	NA	NA	NA	NA	NA	NA	NA	NA	NA	NA	NA	NA	728	729	4.00755e-05	830	831	4.60606e-05	NA	NA	NA	NA	NA	NA	NA	NA	NA	19	20	6.09928e-07	2	3
HFFRFLGL	CATTTCTTCCGGTTCCTAGGGTTG	Pool 13	181	182	1.96981e-05	246	247	1.31422e-05	4	5	8.15144e-08	18	19	3.07548e-07	NA	NA	NA	NA	NA	NA	NA	NA	NA	NA	NA	NA	NA	NA	NA	3350	3351	0.000184216	398	399	2.21158e-05	NA	NA	NA	NA	NA	NA	NA	NA	NA	16	17	5.18439e-07	139	140
HFYSLSYL	CATTTCTACAGCTTGTCCTACCTT	Pool 13	704	705	7.63032e-05	606	607	3.22968e-05	90	91	1.48356e-06	110	111	1.79673e-06	NA	NA	NA	NA	NA	NA	NA	NA	NA	NA	NA	NA	NA	NA	NA	1282	1283	7.05307e-05	3632	3633	0.00020137	NA	NA	NA	NA	NA	NA	NA	NA	NA	1425	1426	4.34879e-05	189	190
HGLFWANL	CACGGACTGTTCTGGGCTAATTTA	Pool 13	17	18	1.94817e-06	44	45	2.39432e-06	NA	1	1.63029e-08	NA	1	1.61867e-08	NA	NA	NA	NA	NA	NA	NA	NA	NA	NA	NA	NA	NA	NA	NA	22	23	1.26439e-06	40	41	2.27255e-06	NA	NA	NA	NA	NA	NA	NA	NA	NA	NA	1	3.04964e-08	2	3
HGLIFLPV	CATGGGCTCATCTTCTTGCCCGTC	Pool 13	404	405	4.38337e-05	416	417	2.21874e-05	474	475	7.74387e-06	74	75	1.214e-06	NA	NA	NA	NA	NA	NA	NA	NA	NA	NA	NA	NA	NA	NA	NA	1424	1425	7.8337e-05	1972	1973	0.000109359	NA	NA	NA	NA	NA	NA	NA	NA	NA	151	152	4.63545e-06	546	547
HGLVFLPV	CATGGTCTTGTCTTCCTCCCTGTG	Pool 13	1983	1984	0.000214731	3156	3157	0.000167975	84	85	1.38574e-06	1168	1169	1.89223e-05	NA	NA	NA	NA	NA	NA	NA	NA	NA	NA	NA	NA	NA	NA	NA	9220	9221	0.000506909	5130	5131	0.000284401	NA	NA	NA	NA	NA	NA	NA	NA	NA	971	972	2.96425e-05	1051	1052
HGVSYFRL	CATGGAGTCTCGTATTTTCGCCTC	Pool 13	93	94	1.01738e-05	14	15	7.98108e-07	136	137	2.23349e-06	4	5	8.09336e-08	NA	NA	NA	NA	NA	NA	NA	NA	NA	NA	NA	NA	NA	NA	NA	376	377	2.07249e-05	270	271	1.5021e-05	NA	NA	NA	NA	NA	NA	NA	NA	NA	NA	1	3.04964e-08	11	12
HGYAFLNT	CACGGCTACGCCTTTCTTAACACG	Pool 13	96	97	1.04985e-05	46	47	2.50074e-06	6	7	1.1412e-07	40	41	6.63656e-07	NA	NA	NA	NA	NA	NA	NA	NA	NA	NA	NA	NA	NA	NA	NA	244	245	1.34685e-05	208	209	1.15844e-05	NA	NA	NA	NA	NA	NA	NA	NA	NA	19	20	6.09928e-07	34	35
HGYEYPKV	CATGGTTATGAATATCCTAAAGTA	Pool 13	2439	2440	0.000264085	2068	2069	0.000110086	3664	3665	5.97501e-05	2084	2085	3.37493e-05	NA	NA	NA	NA	NA	NA	NA	NA	NA	NA	NA	NA	NA	NA	NA	6356	6357	0.000349465	6112	6113	0.000338831	NA	NA	NA	NA	NA	NA	NA	NA	NA	2185	2186	6.66651e-05	1598	1599
HIFRYLPL	CACATCTTTCGGTACTTACCATTG	Pool 13	240	241	2.60838e-05	1158	1159	6.16671e-05	6	7	1.1412e-07	620	621	1.0052e-05	NA	NA	NA	NA	NA	NA	NA	NA	NA	NA	NA	NA	NA	NA	NA	848	849	4.66723e-05	864	865	4.79452e-05	NA	NA	NA	NA	NA	NA	NA	NA	NA	408	409	1.2473e-05	35	36
HILYFRHL	CATATTCTGTACTTTCGACATTTA	Pool 13	2128	2129	0.000230425	840	841	4.47472e-05	574	575	9.37416e-06	860	861	1.39368e-05	NA	NA	NA	NA	NA	NA	NA	NA	NA	NA	NA	NA	NA	NA	NA	8130	8131	0.000446988	4478	4479	0.000248262	NA	NA	NA	NA	NA	NA	NA	NA	NA	1135	1136	3.46439e-05	810	811
HLLHFLPL	CATTTGCTGCACTTCTTGCCTTTA	Pool 13	617	618	6.6887e-05	454	455	2.42093e-05	138	139	2.2661e-06	436	437	7.0736e-06	NA	NA	NA	NA	NA	NA	NA	NA	NA	NA	NA	NA	NA	NA	NA	1912	1913	0.000105164	1190	1191	6.60147e-05	NA	NA	NA	NA	NA	NA	NA	NA	NA	239	240	7.31913e-06	267	268
HLYNLVHL	CATTTGTATAATCTCGTGCACTTG	Pool 13	183	184	1.99146e-05	86	87	4.62903e-06	24	25	4.07572e-07	114	115	1.86147e-06	NA	NA	NA	NA	NA	NA	NA	NA	NA	NA	NA	NA	NA	NA	NA	346	347	1.90757e-05	904	905	5.01623e-05	NA	NA	NA	NA	NA	NA	NA	NA	NA	58	59	1.79929e-06	45	46
HMQFFQHL	CACATGCAATTCTTTCAACATCTT	Pool 13	836	837	9.05897e-05	280	281	1.49512e-05	94	95	1.54877e-06	46	47	7.60776e-07	NA	NA	NA	NA	NA	NA	NA	NA	NA	NA	NA	NA	NA	NA	NA	3274	3275	0.000180038	1590	1591	8.81859e-05	NA	NA	NA	NA	NA	NA	NA	NA	NA	487	488	1.48822e-05	97	98
HQYLYQYL	CACCAATACCTTTATCAGTATTTG	Pool 13	1437	1438	0.000155637	612	613	3.2616e-05	142	143	2.33131e-06	418	419	6.78224e-06	NA	NA	NA	NA	NA	NA	NA	NA	NA	NA	NA	NA	NA	NA	NA	2706	2707	0.000148813	2368	2369	0.000131309	NA	NA	NA	NA	NA	NA	NA	NA	NA	347	348	1.06127e-05	709	710
HSFRFSEI	CACTCATTCCGTTTCTCGGAGATT	Pool 13	144	145	1.56936e-05	150	151	8.03429e-06	104	105	1.7118e-06	5156	5157	8.3475e-05	NA	NA	NA	NA	NA	NA	NA	NA	NA	NA	NA	NA	NA	NA	NA	374	375	2.0615e-05	1928	1929	0.000106921	NA	NA	NA	NA	NA	NA	NA	NA	NA	716	717	2.18659e-05	82	83
HSFRVYDL	CACTCATTTAGGGTCTATGATCTG	Pool 13	162	163	1.76417e-05	130	131	6.97014e-06	378	379	6.17879e-06	3558	3559	5.76086e-05	NA	NA	NA	NA	NA	NA	NA	NA	NA	NA	NA	NA	NA	NA	NA	418	419	2.30338e-05	444	445	2.46654e-05	NA	NA	NA	NA	NA	NA	NA	NA	NA	104	105	3.20212e-06	87	88
HSFSFHGA	CATAGCTTTTCATTTCATGGAGCT	Pool 13	491	492	5.32499e-05	268	269	1.43127e-05	8	9	1.46726e-07	112	113	1.8291e-06	NA	NA	NA	NA	NA	NA	NA	NA	NA	NA	NA	NA	NA	NA	NA	1636	1637	8.99913e-05	996	997	5.52617e-05	NA	NA	NA	NA	NA	NA	NA	NA	NA	63	64	1.95177e-06	46	47
HSHLFIRL	CATTCTCACCTGTTCATACGACTC	Pool 13	221	222	2.40274e-05	60	61	3.24564e-06	NA	1	1.63029e-08	244	245	3.96575e-06	NA	NA	NA	NA	NA	NA	NA	NA	NA	NA	NA	NA	NA	NA	NA	428	429	2.35835e-05	502	503	2.78803e-05	NA	NA	NA	NA	NA	NA	NA	NA	NA	6	7	2.13475e-07	33	34
HSIVYTQI	CACTCTATTGTCTACACTCAAATA	Pool 13	787	788	8.52864e-05	314	315	1.67603e-05	96	97	1.58138e-06	1108	1109	1.79511e-05	NA	NA	NA	NA	NA	NA	NA	NA	NA	NA	NA	NA	NA	NA	NA	2488	2489	0.000136829	1720	1721	9.53915e-05	NA	NA	NA	NA	NA	NA	NA	NA	NA	130	131	3.99503e-06	91	92
HSLAWTAL	CATTCCCTGGCATGGACGGCACTT	Pool 13	424	425	4.59984e-05	114	115	6.11883e-06	228	229	3.73336e-06	68	69	1.11688e-06	NA	NA	NA	NA	NA	NA	NA	NA	NA	NA	NA	NA	NA	NA	NA	1312	1313	7.21799e-05	752	753	4.17372e-05	NA	NA	NA	NA	NA	NA	NA	NA	NA	39	40	1.21986e-06	536	537
HSLLFMRL	CACTCGTTACTATTTATGAGACTA	Pool 13	NA	1	1.08231e-07	NA	1	5.32072e-08	2	3	4.89086e-08	NA	1	1.61867e-08	NA	NA	NA	NA	NA	NA	NA	NA	NA	NA	NA	NA	NA	NA	NA	NA	1	5.49733e-08	2	3	1.66284e-07	NA	NA	NA	NA	NA	NA	NA	NA	NA	NA	1	3.04964e-08	NA	1
HSMFLMSL	CATTCCATGTTCTTGATGAGTTTG	Pool 13	1886	1887	0.000204233	1426	1427	7.59267e-05	384	385	6.27661e-06	3266	3267	5.2882e-05	NA	NA	NA	NA	NA	NA	NA	NA	NA	NA	NA	NA	NA	NA	NA	4416	4417	0.000242817	12994	12995	0.000720286	NA	NA	NA	NA	NA	NA	NA	NA	NA	407	408	1.24425e-05	630	631
HSWHVAKL	CACTCCTGGCATGTCGCTAAGCTT	Pool 13	921	922	9.97894e-05	236	237	1.26101e-05	16	17	2.77149e-07	466	467	7.5592e-06	NA	NA	NA	NA	NA	NA	NA	NA	NA	NA	NA	NA	NA	NA	NA	4536	4537	0.000249414	940	941	5.21577e-05	NA	NA	NA	NA	NA	NA	NA	NA	NA	8	9	2.74468e-07	302	303
HSYCRMFL	CACAGTTACTGCAGGATGTTCCTA	Pool 13	881	882	9.54602e-05	218	219	1.16524e-05	438	439	7.15696e-06	878	879	1.42281e-05	NA	NA	NA	NA	NA	NA	NA	NA	NA	NA	NA	NA	NA	NA	NA	2226	2227	0.000122426	5556	5557	0.000308013	NA	NA	NA	NA	NA	NA	NA	NA	NA	538	539	1.64376e-05	103	104
HTFRHTLL	CATACGTTCCGCCATACCCTCTTA	Pool 13	NA	1	1.08231e-07	NA	1	5.32072e-08	NA	1	1.63029e-08	2	3	4.85602e-08	NA	NA	NA	NA	NA	NA	NA	NA	NA	NA	NA	NA	NA	NA	NA	NA	1	5.49733e-08	NA	1	5.5428e-08	NA	NA	NA	NA	NA	NA	NA	NA	NA	NA	1	3.04964e-08	NA	1
HTQPFASL	CACACCCAGCCATTCGCATCACTA	Pool 13	65	66	7.14328e-06	NA	1	5.32072e-08	NA	1	1.63029e-08	NA	1	1.61867e-08	NA	NA	NA	NA	NA	NA	NA	NA	NA	NA	NA	NA	NA	NA	NA	360	361	1.98454e-05	90	91	5.04394e-06	NA	NA	NA	NA	NA	NA	NA	NA	NA	NA	1	3.04964e-08	51	52
HVISYYHV	CATGTAATCTCCTATTATCATGTC	Pool 13	2851	2852	0.000308676	2532	2533	0.000134774	998	999	1.62866e-05	19232	19233	0.000311319	NA	NA	NA	NA	NA	NA	NA	NA	NA	NA	NA	NA	NA	NA	NA	28858	28859	0.00158647	9890	9891	0.000548238	NA	NA	NA	NA	NA	NA	NA	NA	NA	3173	3174	9.67955e-05	7948	7949
HVLHFFHI	CATGTTCTACATTTCTTCCACATT	Pool 13	943	944	0.000102171	450	451	2.39964e-05	236	237	3.86378e-06	1598	1599	2.58826e-05	NA	NA	NA	NA	NA	NA	NA	NA	NA	NA	NA	NA	NA	NA	NA	3048	3049	0.000167614	2106	2107	0.000116787	NA	NA	NA	NA	NA	NA	NA	NA	NA	240	241	7.34963e-06	759	760
HVYRYFSY	CACGTATACAGATACTTTAGCTAC	Pool 13	3659	3660	0.000396127	1790	1791	9.52941e-05	1078	1079	1.75908e-05	4740	4741	7.67413e-05	NA	NA	NA	NA	NA	NA	NA	NA	NA	NA	NA	NA	NA	NA	NA	6728	6729	0.000369915	10526	10527	0.00058349	NA	NA	NA	NA	NA	NA	NA	NA	NA	1634	1635	4.98616e-05	2056	2057
IAAEFLFV	ATAGCTGCGGAGTTCCTTTTCGTG	Pool 13	26	27	2.92225e-06	70	71	3.77771e-06	NA	1	1.63029e-08	2	3	4.85602e-08	NA	NA	NA	NA	NA	NA	NA	NA	NA	NA	NA	NA	NA	NA	NA	46	47	2.58375e-06	NA	1	5.5428e-08	NA	NA	NA	NA	NA	NA	NA	NA	NA	2	3	9.14892e-08	NA	1
IAALMSFL	ATTGCAGCATTAATGTCCTTCTTG	Pool 13	3323	3324	0.000359761	774	775	4.12356e-05	128	129	2.10307e-06	536	537	8.69227e-06	NA	NA	NA	NA	NA	NA	NA	NA	NA	NA	NA	NA	NA	NA	NA	2518	2519	0.000138478	1116	1117	6.1913e-05	NA	NA	NA	NA	NA	NA	NA	NA	NA	789	790	2.40921e-05	159	160
IAASYGNV	ATCGCAGCGAGCTACGGAAACGTA	Pool 13	47	48	5.19511e-06	52	53	2.81998e-06	NA	1	1.63029e-08	32	33	5.34162e-07	NA	NA	NA	NA	NA	NA	NA	NA	NA	NA	NA	NA	NA	NA	NA	48	49	2.69369e-06	36	37	2.05083e-06	NA	NA	NA	NA	NA	NA	NA	NA	NA	NA	1	3.04964e-08	NA	1
IAAVMAFL	ATTGCTGCTGTGATGGCCTTTCTG	Pool 13	16	17	1.83993e-06	14	15	7.98108e-07	36	37	6.03207e-07	NA	1	1.61867e-08	NA	NA	NA	NA	NA	NA	NA	NA	NA	NA	NA	NA	NA	NA	NA	58	59	3.24342e-06	40	41	2.27255e-06	NA	NA	NA	NA	NA	NA	NA	NA	NA	5	6	1.82978e-07	NA	1
IADQFHRL	ATAGCCGACCAATTCCATAGACTG	Pool 13	2039	2040	0.000220792	46990	46991	0.00250026	5846	5847	9.53229e-05	113096	113097	0.00183067	NA	NA	NA	NA	NA	NA	NA	NA	NA	NA	NA	NA	NA	NA	NA	15364	15365	0.000844665	3022	3023	0.000167559	NA	NA	NA	NA	NA	NA	NA	NA	NA	8211	8212	0.000250436	58236	58237
IAESYQNI	ATAGCCGAGTCATATCAGAATATC	Pool 13	1629	1630	0.000176417	1264	1265	6.73071e-05	6648	6649	0.000108398	692	693	1.12174e-05	NA	NA	NA	NA	NA	NA	NA	NA	NA	NA	NA	NA	NA	NA	NA	6126	6127	0.000336821	2082	2083	0.000115456	NA	NA	NA	NA	NA	NA	NA	NA	NA	132	133	4.05602e-06	874	875
IAEYFVPL	ATTGCAGAATACTTTGTTCCGTTA	Pool 13	425	426	4.61066e-05	266	267	1.42063e-05	42	43	7.01024e-07	230	231	3.73913e-06	NA	NA	NA	NA	NA	NA	NA	NA	NA	NA	NA	NA	NA	NA	NA	344	345	1.89658e-05	194	195	1.08085e-05	NA	NA	NA	NA	NA	NA	NA	NA	NA	6	7	2.13475e-07	144	145
IAFCALLL	ATCGCGTTCTGTGCATTGCTGCTA	Pool 13	1258	1259	0.000136263	606	607	3.22968e-05	276	277	4.5159e-06	614	615	9.95484e-06	NA	NA	NA	NA	NA	NA	NA	NA	NA	NA	NA	NA	NA	NA	NA	2892	2893	0.000159038	2522	2523	0.000139845	NA	NA	NA	NA	NA	NA	NA	NA	NA	300	301	9.17941e-06	560	561
IAFCVAQF	ATAGCCTTTTGCGTAGCGCAATTC	Pool 13	6	7	7.5762e-07	NA	1	5.32072e-08	NA	1	1.63029e-08	4	5	8.09336e-08	NA	NA	NA	NA	NA	NA	NA	NA	NA	NA	NA	NA	NA	NA	NA	146	147	8.08108e-06	178	179	9.9216e-06	NA	NA	NA	NA	NA	NA	NA	NA	NA	293	294	8.96594e-06	6	7
IAFETWEI	ATCGCATTTGAAACCTGGGAGATT	Pool 13	428	429	4.64313e-05	40	41	2.18149e-06	20	21	3.42361e-07	326	327	5.29306e-06	NA	NA	NA	NA	NA	NA	NA	NA	NA	NA	NA	NA	NA	NA	NA	1606	1607	8.83421e-05	1132	1133	6.27999e-05	NA	NA	NA	NA	NA	NA	NA	NA	NA	45	46	1.40283e-06	2	3
IAFFYNRS	ATAGCCTTCTTCTATAATCGGAGT	Pool 13	451	452	4.89206e-05	442	443	2.35708e-05	6	7	1.1412e-07	956	957	1.54907e-05	NA	NA	NA	NA	NA	NA	NA	NA	NA	NA	NA	NA	NA	NA	NA	1452	1453	7.98762e-05	1640	1641	9.09573e-05	NA	NA	NA	NA	NA	NA	NA	NA	NA	247	248	7.56311e-06	65	66
IAFHYKHS	ATTGCTTTTCACTACAAGCACAGT	Pool 13	1150	1151	0.000124574	872	873	4.64499e-05	294	295	4.80935e-06	936	937	1.5167e-05	NA	NA	NA	NA	NA	NA	NA	NA	NA	NA	NA	NA	NA	NA	NA	3134	3135	0.000172341	2956	2957	0.0001639	NA	NA	NA	NA	NA	NA	NA	NA	NA	1416	1417	4.32134e-05	189	190
IAFNYILA	ATAGCATTCAACTATATTTTAGCC	Pool 13	326	327	3.53917e-05	44	45	2.39432e-06	24	25	4.07572e-07	4	5	8.09336e-08	NA	NA	NA	NA	NA	NA	NA	NA	NA	NA	NA	NA	NA	NA	NA	1540	1541	8.47139e-05	452	453	2.51089e-05	NA	NA	NA	NA	NA	NA	NA	NA	NA	46	47	1.43333e-06	220	221
IAFSLWIV	ATTGCATTCTCCCTCTGGATCGTT	Pool 13	141558	141559	0.0153211	16322	16323	0.000868501	20698	20699	0.000337453	9850	9851	0.000159455	NA	NA	NA	NA	NA	NA	NA	NA	NA	NA	NA	NA	NA	NA	NA	13382	13383	0.000735708	10838	10839	0.000600784	NA	NA	NA	NA	NA	NA	NA	NA	NA	11318	11319	0.000345189	18124	18125
IAFTFTCF	ATAGCGTTTACTTTTACGTGCTTT	Pool 13	477	478	5.17346e-05	98	99	5.26751e-06	28	29	4.72784e-07	150	151	2.4442e-06	NA	NA	NA	NA	NA	NA	NA	NA	NA	NA	NA	NA	NA	NA	NA	1250	1251	6.87716e-05	1454	1455	8.06477e-05	NA	NA	NA	NA	NA	NA	NA	NA	NA	85	86	2.62269e-06	105	106
IAFTYNPR	ATAGCGTTTACCTATAATCCCCGA	Pool 13	421	422	4.56737e-05	300	301	1.60154e-05	272	273	4.45069e-06	130	131	2.12046e-06	NA	NA	NA	NA	NA	NA	NA	NA	NA	NA	NA	NA	NA	NA	NA	1296	1297	7.13004e-05	1424	1425	7.89848e-05	NA	NA	NA	NA	NA	NA	NA	NA	NA	794	795	2.42446e-05	248	249
IAFVVFLV	ATTGCCTTCGTGGTCTTTCTGGTT	Pool 13	2941	2942	0.000318417	1282	1283	6.82648e-05	1410	1411	2.30034e-05	2864	2865	4.6375e-05	NA	NA	NA	NA	NA	NA	NA	NA	NA	NA	NA	NA	NA	NA	NA	6120	6121	0.000336492	6464	6465	0.000358342	NA	NA	NA	NA	NA	NA	NA	NA	NA	823	824	2.5129e-05	1084	1085
IAHRYNDL	ATAGCCCATCGGTACAATGATCTT	Pool 13	686	687	7.4355e-05	396	397	2.11233e-05	692	693	1.12979e-05	760	761	1.23181e-05	NA	NA	NA	NA	NA	NA	NA	NA	NA	NA	NA	NA	NA	NA	NA	1552	1553	8.53735e-05	1530	1531	8.48602e-05	NA	NA	NA	NA	NA	NA	NA	NA	NA	124	125	3.81205e-06	489	490
IAIAIPML	ATCGCAATCGCAATCCCGATGTTG	Pool 13	1461	1462	0.000158234	1458	1459	7.76293e-05	728	729	1.18848e-05	4714	4715	7.63204e-05	NA	NA	NA	NA	NA	NA	NA	NA	NA	NA	NA	NA	NA	NA	NA	3046	3047	0.000167504	2966	2967	0.000164455	NA	NA	NA	NA	NA	NA	NA	NA	NA	791	792	2.41531e-05	1331	1332
IAIDVAFL	ATAGCCATAGACGTTGCATTTCTA	Pool 13	5	6	6.49389e-07	NA	1	5.32072e-08	4	5	8.15144e-08	4	5	8.09336e-08	NA	NA	NA	NA	NA	NA	NA	NA	NA	NA	NA	NA	NA	NA	NA	20	21	1.15444e-06	NA	1	5.5428e-08	NA	NA	NA	NA	NA	NA	NA	NA	NA	NA	1	3.04964e-08	4	5
IAILARYM	ATAGCTATATTGGCGCGATATATG	Pool 13	714	715	7.73855e-05	28	29	1.54301e-06	114	115	1.87483e-06	NA	1	1.61867e-08	NA	NA	NA	NA	NA	NA	NA	NA	NA	NA	NA	NA	NA	NA	NA	1958	1959	0.000107693	1582	1583	8.77425e-05	NA	NA	NA	NA	NA	NA	NA	NA	NA	NA	1	3.04964e-08	1	2
IAKRLFHL	ATTGCTAAGAGGCTCTTTCACCTA	Pool 13	183	184	1.99146e-05	38	39	2.07508e-06	48	49	7.98841e-07	14	15	2.42801e-07	NA	NA	NA	NA	NA	NA	NA	NA	NA	NA	NA	NA	NA	NA	NA	348	349	1.91857e-05	842	843	4.67258e-05	NA	NA	NA	NA	NA	NA	NA	NA	NA	18	19	5.79431e-07	7	8
IALCFPTL	ATCGCGCTATGCTTTCCGACGCTC	Pool 13	24	25	2.70579e-06	NA	1	5.32072e-08	2	3	4.89086e-08	NA	1	1.61867e-08	NA	NA	NA	NA	NA	NA	NA	NA	NA	NA	NA	NA	NA	NA	NA	170	171	9.40043e-06	NA	1	5.5428e-08	NA	NA	NA	NA	NA	NA	NA	NA	NA	NA	1	3.04964e-08	NA	1
IALFVSFI	ATCGCCCTTTTCGTCAGCTTCATT	Pool 13	476	477	5.16264e-05	22	23	1.22377e-06	34	35	5.70601e-07	16	17	2.75174e-07	NA	NA	NA	NA	NA	NA	NA	NA	NA	NA	NA	NA	NA	NA	NA	920	921	5.06304e-05	556	557	3.08734e-05	NA	NA	NA	NA	NA	NA	NA	NA	NA	13	14	4.26949e-07	4	5
IALLGSSL	ATCGCTCTACTCGGTTCGTCCCTC	Pool 13	10	11	1.19055e-06	2	3	1.59622e-07	NA	1	1.63029e-08	14	15	2.42801e-07	NA	NA	NA	NA	NA	NA	NA	NA	NA	NA	NA	NA	NA	NA	NA	30	31	1.70417e-06	48	49	2.71597e-06	NA	NA	NA	NA	NA	NA	NA	NA	NA	2	3	9.14892e-08	2	3
IALLNFSL	ATTGCGCTTCTTAATTTTAGTTTA	Pool 13	3636	3637	0.000393638	1704	1705	9.07183e-05	896	897	1.46237e-05	1894	1895	3.06738e-05	NA	NA	NA	NA	NA	NA	NA	NA	NA	NA	NA	NA	NA	NA	NA	6758	6759	0.000371565	7048	7049	0.000390712	NA	NA	NA	NA	NA	NA	NA	NA	NA	592	593	1.80844e-05	1367	1368
IALLTFHI	ATCGCTTTGCTGACCTTCCACATA	Pool 13	112	113	1.22302e-05	24	25	1.33018e-06	68	69	1.1249e-06	12	13	2.10427e-07	NA	NA	NA	NA	NA	NA	NA	NA	NA	NA	NA	NA	NA	NA	NA	352	353	1.94056e-05	444	445	2.46654e-05	NA	NA	NA	NA	NA	NA	NA	NA	NA	10	11	3.3546e-07	64	65
IAMKVELL	ATAGCGATGAAGGTTGAGTTGTTA	Pool 13	99	100	1.08231e-05	8	9	4.78865e-07	NA	1	1.63029e-08	NA	1	1.61867e-08	NA	NA	NA	NA	NA	NA	NA	NA	NA	NA	NA	NA	NA	NA	NA	462	463	2.54526e-05	152	153	8.48048e-06	NA	NA	NA	NA	NA	NA	NA	NA	NA	14	15	4.57446e-07	20	21
IAMWFIRC	ATCGCTATGTGGTTCATACGCTGC	Pool 13	128	129	1.39619e-05	NA	1	5.32072e-08	NA	1	1.63029e-08	NA	1	1.61867e-08	NA	NA	NA	NA	NA	NA	NA	NA	NA	NA	NA	NA	NA	NA	NA	366	367	2.01752e-05	310	311	1.72381e-05	NA	NA	NA	NA	NA	NA	NA	NA	NA	NA	1	3.04964e-08	1	2
IANLYLLL	ATCGCCAATTTGTACCTTCTTTTA	Pool 13	1209	1210	0.00013096	1284	1285	6.83712e-05	2298	2299	3.74803e-05	96	97	1.57011e-06	NA	NA	NA	NA	NA	NA	NA	NA	NA	NA	NA	NA	NA	NA	NA	3480	3481	0.000191362	3222	3223	0.000178644	NA	NA	NA	NA	NA	NA	NA	NA	NA	102	103	3.14113e-06	74	75
IARFFKGL	ATAGCGCGGTTCTTTAAAGGCCTC	Pool 13	7	8	8.65852e-07	NA	1	5.32072e-08	NA	1	1.63029e-08	NA	1	1.61867e-08	NA	NA	NA	NA	NA	NA	NA	NA	NA	NA	NA	NA	NA	NA	NA	10	11	6.04706e-07	2	3	1.66284e-07	NA	NA	NA	NA	NA	NA	NA	NA	NA	NA	1	3.04964e-08	NA	1
IARLYHSI	ATCGCACGACTGTACCATTCAATT	Pool 13	656	657	7.11081e-05	186	187	9.94974e-06	24	25	4.07572e-07	158	159	2.57369e-06	NA	NA	NA	NA	NA	NA	NA	NA	NA	NA	NA	NA	NA	NA	NA	1072	1073	5.89864e-05	690	691	3.83007e-05	NA	NA	NA	NA	NA	NA	NA	NA	NA	75	76	2.31773e-06	97	98
IATLVFGL	ATCGCCACTCTCGTCTTCGGTCTT	Pool 13	NA	1	1.08231e-07	NA	1	5.32072e-08	NA	1	1.63029e-08	NA	1	1.61867e-08	NA	NA	NA	NA	NA	NA	NA	NA	NA	NA	NA	NA	NA	NA	NA	NA	1	5.49733e-08	NA	1	5.5428e-08	NA	NA	NA	NA	NA	NA	NA	NA	NA	NA	1	3.04964e-08	NA	1
IATRLMGL	ATCGCGACACGCTTAATGGGCTTG	Pool 13	892	893	9.66507e-05	1030	1031	5.48566e-05	986	987	1.60909e-05	5162	5163	8.35721e-05	NA	NA	NA	NA	NA	NA	NA	NA	NA	NA	NA	NA	NA	NA	NA	2240	2241	0.000123195	3202	3203	0.000177536	NA	NA	NA	NA	NA	NA	NA	NA	NA	3561	3562	0.000108628	1642	1643
IATYRNLL	ATAGCAACGTATCGAAATTTACTT	Pool 13	1299	1300	0.000140701	882	883	4.69819e-05	198	199	3.24427e-06	4218	4219	6.82918e-05	NA	NA	NA	NA	NA	NA	NA	NA	NA	NA	NA	NA	NA	NA	NA	1622	1623	8.92217e-05	1200	1201	6.6569e-05	NA	NA	NA	NA	NA	NA	NA	NA	NA	261	262	7.99005e-06	461	462
IAVAYTHF	ATTGCGGTCGCATACACCCATTTT	Pool 13	212	213	2.30533e-05	134	135	7.18297e-06	20	21	3.42361e-07	NA	1	1.61867e-08	NA	NA	NA	NA	NA	NA	NA	NA	NA	NA	NA	NA	NA	NA	NA	570	571	3.13898e-05	692	693	3.84116e-05	NA	NA	NA	NA	NA	NA	NA	NA	NA	4	5	1.52482e-07	8	9
IAVDFFSF	ATCGCTGTCGACTTCTTCAGCTTT	Pool 13	466	467	5.05441e-05	692	693	3.68726e-05	580	581	9.47197e-06	130	131	2.12046e-06	NA	NA	NA	NA	NA	NA	NA	NA	NA	NA	NA	NA	NA	NA	NA	1662	1663	9.14206e-05	1772	1773	9.82738e-05	NA	NA	NA	NA	NA	NA	NA	NA	NA	386	387	1.18021e-05	101	102
IAVGIYLL	ATAGCGGTTGGCATCTACCTCCTA	Pool 13	344	345	3.73399e-05	626	627	3.33609e-05	56	57	9.29264e-07	4	5	8.09336e-08	NA	NA	NA	NA	NA	NA	NA	NA	NA	NA	NA	NA	NA	NA	NA	944	945	5.19498e-05	634	635	3.51968e-05	NA	NA	NA	NA	NA	NA	NA	NA	NA	6	7	2.13475e-07	NA	1
IAVLFLAI	ATAGCAGTACTCTTTCTGGCCATC	Pool 13	1197	1198	0.000129661	620	621	3.30417e-05	248	249	4.05942e-06	98	99	1.60249e-06	NA	NA	NA	NA	NA	NA	NA	NA	NA	NA	NA	NA	NA	NA	NA	3010	3011	0.000165525	2076	2077	0.000115124	NA	NA	NA	NA	NA	NA	NA	NA	NA	34	35	1.06737e-06	161	162
IAVQFVDM	ATTGCCGTGCAGTTTGTAGACATG	Pool 13	219	220	2.38109e-05	402	403	2.14425e-05	2	3	4.89086e-08	66	67	1.08451e-06	NA	NA	NA	NA	NA	NA	NA	NA	NA	NA	NA	NA	NA	NA	NA	572	573	3.14997e-05	354	355	1.96769e-05	NA	NA	NA	NA	NA	NA	NA	NA	NA	19	20	6.09928e-07	8	9
IAVRYAVI	ATAGCTGTACGCTATGCGGTCATA	Pool 13	383	384	4.15609e-05	152	153	8.1407e-06	48	49	7.98841e-07	22	23	3.72295e-07	NA	NA	NA	NA	NA	NA	NA	NA	NA	NA	NA	NA	NA	NA	NA	1320	1321	7.26197e-05	1236	1237	6.85644e-05	NA	NA	NA	NA	NA	NA	NA	NA	NA	121	122	3.72056e-06	40	41
IAVSYTYI	ATTGCCGTGTCTTATACTTACATC	Pool 13	8869	8870	0.000960013	4036	4037	0.000214797	8748	8749	0.000142634	3484	3485	5.64107e-05	NA	NA	NA	NA	NA	NA	NA	NA	NA	NA	NA	NA	NA	NA	NA	19344	19345	0.00106346	17266	17267	0.000957074	NA	NA	NA	NA	NA	NA	NA	NA	NA	4102	4103	0.000125127	3912	3913
IAVTILAL	ATAGCTGTAACCATACTGGCCTTA	Pool 13	672	673	7.28398e-05	216	217	1.1546e-05	NA	1	1.63029e-08	298	299	4.83983e-06	NA	NA	NA	NA	NA	NA	NA	NA	NA	NA	NA	NA	NA	NA	NA	1714	1715	9.42792e-05	16232	16233	0.000899762	NA	NA	NA	NA	NA	NA	NA	NA	NA	NA	1	3.04964e-08	14	15
IAWALRDL	ATTGCATGGGCCCTGAGAGACCTT	Pool 13	1822	1823	0.000197306	1592	1593	8.47591e-05	418	419	6.83091e-06	1044	1045	1.69151e-05	NA	NA	NA	NA	NA	NA	NA	NA	NA	NA	NA	NA	NA	NA	NA	2752	2753	0.000151342	1542	1543	8.55253e-05	NA	NA	NA	NA	NA	NA	NA	NA	NA	1240	1241	3.7846e-05	109	110
IAWFLQEL	ATCGCTTGGTTCCTGCAGGAGTTG	Pool 13	240	241	2.60838e-05	248	249	1.32486e-05	132	133	2.16828e-06	148	149	2.41182e-06	NA	NA	NA	NA	NA	NA	NA	NA	NA	NA	NA	NA	NA	NA	NA	550	551	3.02903e-05	458	459	2.54414e-05	NA	NA	NA	NA	NA	NA	NA	NA	NA	173	174	5.30637e-06	96	97
IAYCRNNL	ATTGCGTATTGTCGTAACAATTTA	Pool 13	140	141	1.52606e-05	22	23	1.22377e-06	84	85	1.38574e-06	NA	1	1.61867e-08	NA	NA	NA	NA	NA	NA	NA	NA	NA	NA	NA	NA	NA	NA	NA	284	285	1.56674e-05	442	443	2.45546e-05	NA	NA	NA	NA	NA	NA	NA	NA	NA	NA	1	3.04964e-08	54	55
IAYEMVCL	ATCGCCTACGAAATGGTATGTTTA	Pool 13	2911	2912	0.00031517	7960	7961	0.000423582	6810	6811	0.000111039	16768	16769	0.000271435	NA	NA	NA	NA	NA	NA	NA	NA	NA	NA	NA	NA	NA	NA	NA	8706	8707	0.000478653	4772	4773	0.000264558	NA	NA	NA	NA	NA	NA	NA	NA	NA	10204	10205	0.000311216	30743	30744
IAYGVSAF	ATCGCGTATGGGGTTTCCGCTTTC	Pool 13	1470	1471	0.000159208	346	347	1.84629e-05	24	25	4.07572e-07	NA	1	1.61867e-08	NA	NA	NA	NA	NA	NA	NA	NA	NA	NA	NA	NA	NA	NA	NA	3120	3121	0.000171572	3172	3173	0.000175873	NA	NA	NA	NA	NA	NA	NA	NA	NA	269	270	8.23403e-06	141	142
IAYIHLVA	ATCGCCTATATTCACTTGGTAGCT	Pool 13	6551	6552	0.000709133	3840	3841	0.000204369	1454	1455	2.37207e-05	3242	3243	5.24936e-05	NA	NA	NA	NA	NA	NA	NA	NA	NA	NA	NA	NA	NA	NA	NA	10966	10967	0.000602892	9560	9561	0.000529947	NA	NA	NA	NA	NA	NA	NA	NA	NA	1714	1715	5.23013e-05	3340	3341
IAYILKQM	ATTGCGTACATCTTGAAGCAGATG	Pool 13	620	621	6.72117e-05	1808	1809	9.62518e-05	NA	1	1.63029e-08	364	365	5.90816e-06	NA	NA	NA	NA	NA	NA	NA	NA	NA	NA	NA	NA	NA	NA	NA	24108	24109	0.00132535	1682	1683	9.32852e-05	NA	NA	NA	NA	NA	NA	NA	NA	NA	81	82	2.5007e-06	140	141
IAYKVLEV	ATTGCCTACAAAGTCCTAGAAGTA	Pool 13	65	66	7.14328e-06	8	9	4.78865e-07	4	5	8.15144e-08	4	5	8.09336e-08	NA	NA	NA	NA	NA	NA	NA	NA	NA	NA	NA	NA	NA	NA	NA	62	63	3.46332e-06	160	161	8.9239e-06	NA	NA	NA	NA	NA	NA	NA	NA	NA	39	40	1.21986e-06	NA	1
IAYPHEVV	ATAGCCTACCCGCACGAGGTCGTA	Pool 13	472	473	5.11935e-05	226	227	1.2078e-05	30	31	5.05389e-07	186	187	3.02692e-06	NA	NA	NA	NA	NA	NA	NA	NA	NA	NA	NA	NA	NA	NA	NA	738	739	4.06253e-05	540	541	2.99865e-05	NA	NA	NA	NA	NA	NA	NA	NA	NA	265	266	8.11204e-06	244	245
IAYRCFPG	ATAGCCTACCGGTGCTTTCCAGGT	Pool 13	15	16	1.7317e-06	NA	1	5.32072e-08	2	3	4.89086e-08	NA	1	1.61867e-08	NA	NA	NA	NA	NA	NA	NA	NA	NA	NA	NA	NA	NA	NA	NA	32	33	1.81412e-06	32	33	1.82912e-06	NA	NA	NA	NA	NA	NA	NA	NA	NA	NA	1	3.04964e-08	NA	1
IAYRQFTA	ATAGCCTACAGGCAGTTCACGGCT	Pool 13	98	99	1.07149e-05	2	3	1.59622e-07	4	5	8.15144e-08	2	3	4.85602e-08	NA	NA	NA	NA	NA	NA	NA	NA	NA	NA	NA	NA	NA	NA	NA	172	173	9.51038e-06	82	83	4.60052e-06	NA	NA	NA	NA	NA	NA	NA	NA	NA	NA	1	3.04964e-08	NA	1
IAYSCKLL	ATTGCTTACTCGTGCAAGCTCTTG	Pool 13	176	177	1.9157e-05	198	199	1.05882e-05	32	33	5.37995e-07	68	69	1.11688e-06	NA	NA	NA	NA	NA	NA	NA	NA	NA	NA	NA	NA	NA	NA	NA	398	399	2.19343e-05	190	191	1.05867e-05	NA	NA	NA	NA	NA	NA	NA	NA	NA	NA	1	3.04964e-08	13	14
IAYSLICV	ATAGCTTACTCGTTGATTTGTGTT	Pool 13	15015	15016	0.0016252	22320	22321	0.00118764	2694	2695	4.39363e-05	32732	32733	0.00052984	NA	NA	NA	NA	NA	NA	NA	NA	NA	NA	NA	NA	NA	NA	NA	41502	41503	0.00228156	58286	58287	0.00323073	NA	NA	NA	NA	NA	NA	NA	NA	NA	5296	5297	0.000161539	3968	3969
IAYVMAAI	ATCGCGTATGTAATGGCCGCGATA	Pool 13	NA	1	1.08231e-07	NA	1	5.32072e-08	NA	1	1.63029e-08	NA	1	1.61867e-08	NA	NA	NA	NA	NA	NA	NA	NA	NA	NA	NA	NA	NA	NA	NA	NA	1	5.49733e-08	NA	1	5.5428e-08	NA	NA	NA	NA	NA	NA	NA	NA	NA	NA	1	3.04964e-08	NA	1
ICFFCSYI	ATCTGCTTCTTTTGCTCGTACATA	Pool 13	2120	2121	0.000229559	1836	1837	9.77416e-05	898	899	1.46563e-05	576	577	9.33974e-06	NA	NA	NA	NA	NA	NA	NA	NA	NA	NA	NA	NA	NA	NA	NA	4676	4677	0.00025711	4810	4811	0.000266664	NA	NA	NA	NA	NA	NA	NA	NA	NA	914	915	2.79042e-05	1245	1246
ICIVWFPL	ATTTGTATTGTGTGGTTCCCGTTA	Pool 13	300	301	3.25777e-05	28	29	1.54301e-06	112	113	1.84223e-06	8	9	1.45681e-07	NA	NA	NA	NA	NA	NA	NA	NA	NA	NA	NA	NA	NA	NA	NA	742	743	4.08452e-05	754	755	4.18481e-05	NA	NA	NA	NA	NA	NA	NA	NA	NA	NA	1	3.04964e-08	84	85
ICLRLALL	ATTTGCTTGAGGCTAGCACTACTA	Pool 13	2516	2517	0.000272419	1370	1371	7.29471e-05	1520	1521	2.47967e-05	23078	23079	0.000373573	NA	NA	NA	NA	NA	NA	NA	NA	NA	NA	NA	NA	NA	NA	NA	5686	5687	0.000312633	6516	6517	0.000361224	NA	NA	NA	NA	NA	NA	NA	NA	NA	1945	1946	5.9346e-05	1625	1626
ICYIMAEI	ATCTGCTATATAATGGCCGAAATC	Pool 13	1037	1038	0.000112344	422	423	2.25066e-05	22	23	3.74966e-07	698	699	1.13145e-05	NA	NA	NA	NA	NA	NA	NA	NA	NA	NA	NA	NA	NA	NA	NA	2426	2427	0.00013342	1772	1773	9.82738e-05	NA	NA	NA	NA	NA	NA	NA	NA	NA	356	357	1.08872e-05	866	867
ICYTAALL	ATTTGTTACACGGCCGCGCTACTA	Pool 13	333	334	3.61493e-05	1862	1863	9.9125e-05	86	87	1.41835e-06	1014	1015	1.64295e-05	NA	NA	NA	NA	NA	NA	NA	NA	NA	NA	NA	NA	NA	NA	NA	1132	1133	6.22848e-05	932	933	5.17143e-05	NA	NA	NA	NA	NA	NA	NA	NA	NA	178	179	5.45885e-06	205	206
IDIVFAPL	ATTGACATCGTATTTGCCCCGCTC	Pool 13	167	168	1.81829e-05	4	5	2.66036e-07	26	27	4.40178e-07	4	5	8.09336e-08	NA	NA	NA	NA	NA	NA	NA	NA	NA	NA	NA	NA	NA	NA	NA	828	829	4.55729e-05	424	425	2.35569e-05	NA	NA	NA	NA	NA	NA	NA	NA	NA	2	3	9.14892e-08	57	58
IDPIFMHL	ATCGACCCGATATTCATGCATCTA	Pool 13	1845	1846	0.000199795	624	625	3.32545e-05	74	75	1.22272e-06	1540	1541	2.49437e-05	NA	NA	NA	NA	NA	NA	NA	NA	NA	NA	NA	NA	NA	NA	NA	3002	3003	0.000165085	8226	8227	0.000456006	NA	NA	NA	NA	NA	NA	NA	NA	NA	36	37	1.12837e-06	101	102
IEWIFLTL	ATAGAGTGGATCTTTCTAACCCTA	Pool 13	429	430	4.65395e-05	120	121	6.43807e-06	110	111	1.80962e-06	26	27	4.37042e-07	NA	NA	NA	NA	NA	NA	NA	NA	NA	NA	NA	NA	NA	NA	NA	682	683	3.75468e-05	918	919	5.09383e-05	NA	NA	NA	NA	NA	NA	NA	NA	NA	20	21	6.40424e-07	100	101
IFAGFGLL	ATCTTCGCAGGTTTTGGACTGCTA	Pool 13	1057	1058	0.000114509	926	927	4.93231e-05	1274	1275	2.07862e-05	416	417	6.74987e-06	NA	NA	NA	NA	NA	NA	NA	NA	NA	NA	NA	NA	NA	NA	NA	4216	4217	0.000231822	2098	2099	0.000116343	NA	NA	NA	NA	NA	NA	NA	NA	NA	2099	2100	6.40424e-05	1196	1197
IFCDFPPL	ATCTTCTGCGATTTCCCACCGCTG	Pool 13	216	217	2.34862e-05	152	153	8.1407e-06	264	265	4.32026e-06	4	5	8.09336e-08	NA	NA	NA	NA	NA	NA	NA	NA	NA	NA	NA	NA	NA	NA	NA	708	709	3.89761e-05	460	461	2.55523e-05	NA	NA	NA	NA	NA	NA	NA	NA	NA	2	3	9.14892e-08	36	37
IFDFMDTL	ATCTTTGATTTTATGGACACGTTG	Pool 13	535	536	5.80121e-05	1428	1429	7.60331e-05	134	135	2.20089e-06	84	85	1.37587e-06	NA	NA	NA	NA	NA	NA	NA	NA	NA	NA	NA	NA	NA	NA	NA	1674	1675	9.20803e-05	1022	1023	5.67028e-05	NA	NA	NA	NA	NA	NA	NA	NA	NA	477	478	1.45773e-05	694	695
IFFASIGL	ATCTTCTTCGCCAGTATTGGCCTG	Pool 13	2	3	3.24694e-07	NA	1	5.32072e-08	NA	1	1.63029e-08	NA	1	1.61867e-08	NA	NA	NA	NA	NA	NA	NA	NA	NA	NA	NA	NA	NA	NA	NA	22	23	1.26439e-06	14	15	8.31419e-07	NA	NA	NA	NA	NA	NA	NA	NA	NA	NA	1	3.04964e-08	NA	1
IFFCFSSF	ATTTTCTTTTGTTTCTCAAGCTTT	Pool 13	1227	1228	0.000132908	614	615	3.27224e-05	126	127	2.07047e-06	5112	5113	8.27627e-05	NA	NA	NA	NA	NA	NA	NA	NA	NA	NA	NA	NA	NA	NA	NA	1778	1779	9.77975e-05	3242	3243	0.000179753	NA	NA	NA	NA	NA	NA	NA	NA	NA	98	99	3.01914e-06	396	397
IFFCIGLL	ATTTTCTTCTGTATAGGTTTACTA	Pool 13	270	271	2.93307e-05	220	221	1.17588e-05	20	21	3.42361e-07	10	11	1.78054e-07	NA	NA	NA	NA	NA	NA	NA	NA	NA	NA	NA	NA	NA	NA	NA	832	833	4.57928e-05	772	773	4.28458e-05	NA	NA	NA	NA	NA	NA	NA	NA	NA	30	31	9.45388e-07	42	43
IFFFFYSV	ATTTTCTTCTTCTTCTACTCGGTC	Pool 13	2854	2855	0.000309001	1548	1549	8.24179e-05	1702	1703	2.77638e-05	1114	1115	1.80482e-05	NA	NA	NA	NA	NA	NA	NA	NA	NA	NA	NA	NA	NA	NA	NA	8490	8491	0.000466778	17084	17085	0.000946987	NA	NA	NA	NA	NA	NA	NA	NA	NA	3006	3007	9.17026e-05	3446	3447
IFFHMAVM	ATTTTCTTCCACATGGCTGTAATG	Pool 13	411	412	4.45914e-05	968	969	5.15578e-05	598	599	9.76543e-06	626	627	1.01491e-05	NA	NA	NA	NA	NA	NA	NA	NA	NA	NA	NA	NA	NA	NA	NA	1244	1245	6.84418e-05	1420	1421	7.87631e-05	NA	NA	NA	NA	NA	NA	NA	NA	NA	744	745	2.27198e-05	211	212
IFFLLAQV	ATTTTCTTCCTCTTGGCACAAGTA	Pool 13	812	813	8.79922e-05	1192	1193	6.34762e-05	214	215	3.50512e-06	988	989	1.60087e-05	NA	NA	NA	NA	NA	NA	NA	NA	NA	NA	NA	NA	NA	NA	NA	2218	2219	0.000121986	2084	2085	0.000115567	NA	NA	NA	NA	NA	NA	NA	NA	NA	544	545	1.66205e-05	347	348
IFFLVPQV	ATCTTCTTCTTAGTTCCACAGGTC	Pool 13	394	395	4.27514e-05	184	185	9.84333e-06	100	101	1.64659e-06	96	97	1.57011e-06	NA	NA	NA	NA	NA	NA	NA	NA	NA	NA	NA	NA	NA	NA	NA	778	779	4.28242e-05	1344	1345	7.45506e-05	NA	NA	NA	NA	NA	NA	NA	NA	NA	684	685	2.089e-05	39	40
IFFMFIQI	ATCTTCTTTATGTTTATACAGATA	Pool 13	980	981	0.000106175	1106	1107	5.89004e-05	652	653	1.06458e-05	1128	1129	1.82748e-05	NA	NA	NA	NA	NA	NA	NA	NA	NA	NA	NA	NA	NA	NA	NA	2520	2521	0.000138588	3286	3287	0.000182192	NA	NA	NA	NA	NA	NA	NA	NA	NA	390	391	1.19241e-05	1069	1070
IFFSLSLL	ATTTTCTTTTCCTTGTCTCTACTT	Pool 13	976	977	0.000105742	792	793	4.21933e-05	266	267	4.35287e-06	16074	16075	0.000260202	NA	NA	NA	NA	NA	NA	NA	NA	NA	NA	NA	NA	NA	NA	NA	4668	4669	0.00025667	3230	3231	0.000179088	NA	NA	NA	NA	NA	NA	NA	NA	NA	421	422	1.28695e-05	273	274
IFFSYVLI	ATATTCTTCTCTTACGTGTTGATA	Pool 13	7465	7466	0.000808056	12020	12021	0.000639604	5052	5053	8.23785e-05	21586	21587	0.000349423	NA	NA	NA	NA	NA	NA	NA	NA	NA	NA	NA	NA	NA	NA	NA	22226	22227	0.00122189	22416	22417	0.00124253	NA	NA	NA	NA	NA	NA	NA	NA	NA	7889	7890	0.000240617	50158	50159
IFFVEAFL	ATCTTCTTCGTTGAAGCGTTTCTT	Pool 13	319	320	3.46341e-05	172	173	9.20484e-06	74	75	1.22272e-06	1358	1359	2.19978e-05	NA	NA	NA	NA	NA	NA	NA	NA	NA	NA	NA	NA	NA	NA	NA	1388	1389	7.63579e-05	1470	1471	8.15345e-05	NA	NA	NA	NA	NA	NA	NA	NA	NA	114	115	3.50708e-06	67	68
IFFVSAGL	ATATTCTTCGTGAGCGCAGGCTTG	Pool 13	236	237	2.56509e-05	246	247	1.31422e-05	16	17	2.77149e-07	NA	1	1.61867e-08	NA	NA	NA	NA	NA	NA	NA	NA	NA	NA	NA	NA	NA	NA	NA	544	545	2.99605e-05	592	593	3.28688e-05	NA	NA	NA	NA	NA	NA	NA	NA	NA	4	5	1.52482e-07	188	189
IFIQHNGL	ATATTTATACAGCATAACGGACTG	Pool 13	465	466	5.04359e-05	68	69	3.6713e-06	12	13	2.11937e-07	NA	1	1.61867e-08	NA	NA	NA	NA	NA	NA	NA	NA	NA	NA	NA	NA	NA	NA	NA	274	275	1.51177e-05	702	703	3.89659e-05	NA	NA	NA	NA	NA	NA	NA	NA	NA	17	18	5.48935e-07	100	101
IFIRWLSV	ATCTTCATCCGCTGGCTATCGGTC	Pool 13	496	497	5.3791e-05	52	53	2.81998e-06	24	25	4.07572e-07	30	31	5.01789e-07	NA	NA	NA	NA	NA	NA	NA	NA	NA	NA	NA	NA	NA	NA	NA	1730	1731	9.51588e-05	1924	1925	0.000106699	NA	NA	NA	NA	NA	NA	NA	NA	NA	80	81	2.47021e-06	13	14
IFIYVWPL	ATCTTCATCTATGTTTGGCCCCTA	Pool 13	5	6	6.49389e-07	2	3	1.59622e-07	NA	1	1.63029e-08	NA	1	1.61867e-08	NA	NA	NA	NA	NA	NA	NA	NA	NA	NA	NA	NA	NA	NA	NA	24	25	1.37433e-06	8	9	4.98852e-07	NA	NA	NA	NA	NA	NA	NA	NA	NA	1	2	6.09928e-08	NA	1
IFKFSQTI	ATCTTTAAATTTTCCCAAACGATA	Pool 13	140	141	1.52606e-05	46	47	2.50074e-06	170	171	2.78779e-06	28	29	4.69415e-07	NA	NA	NA	NA	NA	NA	NA	NA	NA	NA	NA	NA	NA	NA	NA	546	547	3.00704e-05	214	215	1.1917e-05	NA	NA	NA	NA	NA	NA	NA	NA	NA	32	33	1.00638e-06	58	59
IFKKLPNL	ATCTTCAAGAAGCTGCCAAACTTA	Pool 13	1531	1532	0.000165811	1006	1007	5.35796e-05	690	691	1.12653e-05	3702	3703	5.99395e-05	NA	NA	NA	NA	NA	NA	NA	NA	NA	NA	NA	NA	NA	NA	NA	3964	3965	0.000217969	4236	4237	0.000234848	NA	NA	NA	NA	NA	NA	NA	NA	NA	849	850	2.59219e-05	2138	2139
IFLAYAQL	ATATTCCTGGCATACGCCCAACTT	Pool 13	531	532	5.75791e-05	430	431	2.29323e-05	388	389	6.34182e-06	596	597	9.66348e-06	NA	NA	NA	NA	NA	NA	NA	NA	NA	NA	NA	NA	NA	NA	NA	1982	1983	0.000109012	3354	3355	0.000185961	NA	NA	NA	NA	NA	NA	NA	NA	NA	28	29	8.84395e-07	139	140
IFLFITYL	ATCTTTCTTTTCATTACGTATCTT	Pool 13	7190	7191	0.000778292	42150	42151	0.00224274	7600	7601	0.000123918	42980	42981	0.000695722	NA	NA	NA	NA	NA	NA	NA	NA	NA	NA	NA	NA	NA	NA	NA	18834	18835	0.00103542	15594	15595	0.000864399	NA	NA	NA	NA	NA	NA	NA	NA	NA	79474	79475	0.0024237	33499	33500
IFLFLTAI	ATCTTTCTATTTCTTACCGCGATC	Pool 13	1703	1704	0.000184426	1920	1921	0.000102211	2100	2101	3.42524e-05	24926	24927	0.000403487	NA	NA	NA	NA	NA	NA	NA	NA	NA	NA	NA	NA	NA	NA	NA	4950	4951	0.000272173	5164	5165	0.000286285	NA	NA	NA	NA	NA	NA	NA	NA	NA	7583	7584	0.000231285	1387	1388
IFLFLTFL	ATATTCTTGTTCCTGACATTTCTC	Pool 13	2211	2212	0.000239408	900	901	4.79397e-05	332	333	5.42886e-06	978	979	1.58468e-05	NA	NA	NA	NA	NA	NA	NA	NA	NA	NA	NA	NA	NA	NA	NA	5620	5621	0.000309005	7068	7069	0.00039182	NA	NA	NA	NA	NA	NA	NA	NA	NA	922	923	2.81482e-05	3037	3038
IFLGMGTL	ATTTTCTTGGGGATGGGTACCTTG	Pool 13	446	447	4.83795e-05	90	91	4.84185e-06	18	19	3.09755e-07	4	5	8.09336e-08	NA	NA	NA	NA	NA	NA	NA	NA	NA	NA	NA	NA	NA	NA	NA	960	961	5.28293e-05	1024	1025	5.68137e-05	NA	NA	NA	NA	NA	NA	NA	NA	NA	10	11	3.3546e-07	25	26
IFLKLGGL	ATCTTCTTAAAATTGGGTGGACTC	Pool 13	255	256	2.77073e-05	62	63	3.35205e-06	24	25	4.07572e-07	4	5	8.09336e-08	NA	NA	NA	NA	NA	NA	NA	NA	NA	NA	NA	NA	NA	NA	NA	778	779	4.28242e-05	1584	1585	8.78533e-05	NA	NA	NA	NA	NA	NA	NA	NA	NA	25	26	7.92906e-07	192	193
IFLRLGHI	ATATTTCTCCGGTTAGGACATATA	Pool 13	569	570	6.16919e-05	430	431	2.29323e-05	76	77	1.25532e-06	30	31	5.01789e-07	NA	NA	NA	NA	NA	NA	NA	NA	NA	NA	NA	NA	NA	NA	NA	1762	1763	9.69179e-05	2084	2085	0.000115567	NA	NA	NA	NA	NA	NA	NA	NA	NA	809	810	2.47021e-05	541	542
IFLSALLL	ATCTTCTTATCGGCATTACTTTTG	Pool 13	594	595	6.43977e-05	556	557	2.96364e-05	4678	4679	7.62812e-05	230	231	3.73913e-06	NA	NA	NA	NA	NA	NA	NA	NA	NA	NA	NA	NA	NA	NA	NA	2056	2057	0.00011308	1762	1763	9.77195e-05	NA	NA	NA	NA	NA	NA	NA	NA	NA	113	114	3.47659e-06	703	704
IFLTTFPL	ATTTTCCTTACAACGTTTCCATTG	Pool 13	8819	8820	0.000954602	20720	20721	0.00110251	1794	1795	2.92637e-05	4558	4559	7.37953e-05	NA	NA	NA	NA	NA	NA	NA	NA	NA	NA	NA	NA	NA	NA	NA	15908	15909	0.00087457	17488	17489	0.000969379	NA	NA	NA	NA	NA	NA	NA	NA	NA	2974	2975	9.07268e-05	7470	7471
IFMQHQRI	ATCTTCATGCAGCACCAGCGAATA	Pool 13	319	320	3.46341e-05	2372	2373	0.000126261	2	3	4.89086e-08	348	349	5.64917e-06	NA	NA	NA	NA	NA	NA	NA	NA	NA	NA	NA	NA	NA	NA	NA	748	749	4.1175e-05	886	887	4.91646e-05	NA	NA	NA	NA	NA	NA	NA	NA	NA	230	231	7.04467e-06	33	34
IFMYEEGL	ATCTTCATGTACGAAGAGGGCTTA	Pool 13	42	43	4.65395e-06	10	11	5.85279e-07	NA	1	1.63029e-08	NA	1	1.61867e-08	NA	NA	NA	NA	NA	NA	NA	NA	NA	NA	NA	NA	NA	NA	NA	192	193	1.06098e-05	102	103	5.70908e-06	NA	NA	NA	NA	NA	NA	NA	NA	NA	2	3	9.14892e-08	61	62
IFNFLLTV	ATATTTAATTTCCTTTTGACAGTA	Pool 13	574	575	6.22331e-05	240	241	1.28229e-05	214	215	3.50512e-06	610	611	9.89009e-06	NA	NA	NA	NA	NA	NA	NA	NA	NA	NA	NA	NA	NA	NA	NA	1446	1447	7.95464e-05	1634	1635	9.06247e-05	NA	NA	NA	NA	NA	NA	NA	NA	NA	333	334	1.01858e-05	245	246
IFPRFYFL	ATTTTCCCCAGGTTCTATTTTCTA	Pool 13	1722	1723	0.000186483	1820	1821	9.68903e-05	394	395	6.43964e-06	500	501	8.10955e-06	NA	NA	NA	NA	NA	NA	NA	NA	NA	NA	NA	NA	NA	NA	NA	5774	5775	0.000317471	4724	4725	0.000261897	NA	NA	NA	NA	NA	NA	NA	NA	NA	341	342	1.04298e-05	865	866
IFPYEMLM	ATCTTTCCTTACGAAATGTTAATG	Pool 13	7777	7778	0.000841824	1864	1865	9.92314e-05	4162	4163	6.78689e-05	5760	5761	9.32517e-05	NA	NA	NA	NA	NA	NA	NA	NA	NA	NA	NA	NA	NA	NA	NA	12980	12981	0.000713608	12580	12581	0.000697339	NA	NA	NA	NA	NA	NA	NA	NA	NA	1826	1827	5.57169e-05	7226	7227
IFQHYFGI	ATCTTCCAACATTATTTCGGTATT	Pool 13	962	963	0.000104227	806	807	4.29382e-05	1346	1347	2.196e-05	676	677	1.09584e-05	NA	NA	NA	NA	NA	NA	NA	NA	NA	NA	NA	NA	NA	NA	NA	2208	2209	0.000121436	1782	1783	9.8828e-05	NA	NA	NA	NA	NA	NA	NA	NA	NA	17996	17997	0.000548844	406	407
IFQKSSSL	ATATTCCAAAAGTCATCCTCGCTG	Pool 13	539	540	5.8445e-05	216	217	1.1546e-05	40	41	6.68418e-07	48	49	7.9315e-07	NA	NA	NA	NA	NA	NA	NA	NA	NA	NA	NA	NA	NA	NA	NA	2128	2129	0.000117038	1920	1921	0.000106477	NA	NA	NA	NA	NA	NA	NA	NA	NA	130	131	3.99503e-06	107	108
IFQMMNTL	ATATTCCAAATGATGAATACTCTA	Pool 13	8	9	9.74083e-07	NA	1	5.32072e-08	6	7	1.1412e-07	NA	1	1.61867e-08	NA	NA	NA	NA	NA	NA	NA	NA	NA	NA	NA	NA	NA	NA	NA	66	67	3.68321e-06	NA	1	5.5428e-08	NA	NA	NA	NA	NA	NA	NA	NA	NA	NA	1	3.04964e-08	NA	1
IFQNIANL	ATCTTCCAAAACATAGCAAATTTA	Pool 13	169	170	1.83993e-05	48	49	2.60715e-06	30	31	5.05389e-07	NA	1	1.61867e-08	NA	NA	NA	NA	NA	NA	NA	NA	NA	NA	NA	NA	NA	NA	NA	318	319	1.75365e-05	14	15	8.31419e-07	NA	NA	NA	NA	NA	NA	NA	NA	NA	NA	1	3.04964e-08	12	13
IFQRLTEL	ATATTCCAGAGGTTGACTGAATTA	Pool 13	568	569	6.15837e-05	1098	1099	5.84747e-05	686	687	1.12001e-05	1092	1093	1.76921e-05	NA	NA	NA	NA	NA	NA	NA	NA	NA	NA	NA	NA	NA	NA	NA	1440	1441	7.92165e-05	1346	1347	7.46615e-05	NA	NA	NA	NA	NA	NA	NA	NA	NA	2220	2221	6.77325e-05	6593	6594
IFRLAFRM	ATATTTCGACTCGCTTTTCGTATG	Pool 13	2351	2352	0.00025456	410	411	2.18682e-05	664	665	1.08414e-05	14	15	2.42801e-07	NA	NA	NA	NA	NA	NA	NA	NA	NA	NA	NA	NA	NA	NA	NA	2220	2221	0.000122096	1396	1397	7.74329e-05	NA	NA	NA	NA	NA	NA	NA	NA	NA	69	70	2.13475e-06	59	60
IFSAHPTL	ATATTTTCAGCACACCCGACGTTG	Pool 13	76	77	8.33382e-06	32	33	1.75584e-06	4	5	8.15144e-08	4	5	8.09336e-08	NA	NA	NA	NA	NA	NA	NA	NA	NA	NA	NA	NA	NA	NA	NA	178	179	9.84022e-06	198	199	1.10302e-05	NA	NA	NA	NA	NA	NA	NA	NA	NA	10	11	3.3546e-07	6	7
IFSFEVNV	ATCTTTTCGTTCGAGGTGAACGTG	Pool 13	348	349	3.77728e-05	2	3	1.59622e-07	254	255	4.15723e-06	NA	1	1.61867e-08	NA	NA	NA	NA	NA	NA	NA	NA	NA	NA	NA	NA	NA	NA	NA	296	297	1.63271e-05	828	829	4.59498e-05	NA	NA	NA	NA	NA	NA	NA	NA	NA	25	26	7.92906e-07	5	6
IFSFSAAV	ATATTTTCATTTTCCGCCGCCGTT	Pool 13	523	524	5.67133e-05	138	139	7.3958e-06	6	7	1.1412e-07	38	39	6.31282e-07	NA	NA	NA	NA	NA	NA	NA	NA	NA	NA	NA	NA	NA	NA	NA	1142	1143	6.28345e-05	662	663	3.67487e-05	NA	NA	NA	NA	NA	NA	NA	NA	NA	23	24	7.31913e-07	363	364
IFSFVMNF	ATCTTCTCCTTTGTTATGAACTTC	Pool 13	1262	1263	0.000136696	436	437	2.32515e-05	218	219	3.57033e-06	108	109	1.76435e-06	NA	NA	NA	NA	NA	NA	NA	NA	NA	NA	NA	NA	NA	NA	NA	2382	2383	0.000131001	2366	2367	0.000131198	NA	NA	NA	NA	NA	NA	NA	NA	NA	221	222	6.7702e-06	167	168
IFSKYGKI	ATATTTTCGAAATACGGCAAAATA	Pool 13	468	469	5.07606e-05	192	193	1.0269e-05	242	243	3.9616e-06	1090	1091	1.76597e-05	NA	NA	NA	NA	NA	NA	NA	NA	NA	NA	NA	NA	NA	NA	NA	1098	1099	6.04157e-05	1198	1199	6.64581e-05	NA	NA	NA	NA	NA	NA	NA	NA	NA	56	57	1.73829e-06	85	86
IFSLFAPF	ATATTCTCTTTATTTGCTCCTTTC	Pool 13	28308	28309	0.00306392	189170	189171	0.0100653	615942	615943	0.0100416	1332886	1332887	0.0215751	NA	NA	NA	NA	NA	NA	NA	NA	NA	NA	NA	NA	NA	NA	NA	58738	58739	0.00322908	54278	54279	0.00300857	NA	NA	NA	NA	NA	NA	NA	NA	NA	273858	273859	0.00835171	119109	119110
IFSYVLIL	ATATTCAGTTATGTTCTCATTTTG	Pool 13	2254	2255	0.000244062	1452	1453	7.731e-05	212	213	3.47251e-06	2940	2941	4.76052e-05	NA	NA	NA	NA	NA	NA	NA	NA	NA	NA	NA	NA	NA	NA	NA	5518	5519	0.000303398	4262	4263	0.000236289	NA	NA	NA	NA	NA	NA	NA	NA	NA	1315	1316	4.01333e-05	812	813
IFTFFLSL	ATATTTACTTTCTTCTTAAGTCTG	Pool 13	2188	2189	0.000236919	1120	1121	5.96453e-05	734	735	1.19826e-05	6578	6579	0.000106492	NA	NA	NA	NA	NA	NA	NA	NA	NA	NA	NA	NA	NA	NA	NA	5074	5075	0.00027899	4748	4749	0.000263227	NA	NA	NA	NA	NA	NA	NA	NA	NA	927	928	2.83007e-05	1022	1023
IFTFNFTI	ATATTTACATTCAACTTCACCATC	Pool 13	1349	1350	0.000146112	1626	1627	8.65681e-05	1684	1685	2.74704e-05	1358	1359	2.19978e-05	NA	NA	NA	NA	NA	NA	NA	NA	NA	NA	NA	NA	NA	NA	NA	3602	3603	0.000198069	3590	3591	0.000199042	NA	NA	NA	NA	NA	NA	NA	NA	NA	2045	2046	6.23956e-05	400	401
IFTSFLLL	ATATTTACTTCCTTCTTACTATTA	Pool 13	2990	2991	0.00032372	982	983	5.23027e-05	474	475	7.74387e-06	486	487	7.88294e-06	NA	NA	NA	NA	NA	NA	NA	NA	NA	NA	NA	NA	NA	NA	NA	4980	4981	0.000273822	4452	4453	0.000246821	NA	NA	NA	NA	NA	NA	NA	NA	NA	364	365	1.11312e-05	601	602
IFVFNHCL	ATCTTCGTCTTCAACCATTGTCTC	Pool 13	1984	1985	0.000214839	1908	1909	0.000101573	1374	1375	2.24165e-05	1084	1085	1.75626e-05	NA	NA	NA	NA	NA	NA	NA	NA	NA	NA	NA	NA	NA	NA	NA	3680	3681	0.000202357	4934	4935	0.000273537	NA	NA	NA	NA	NA	NA	NA	NA	NA	856	857	2.61354e-05	1626	1627
IFVFYCVM	ATATTTGTATTCTACTGCGTTATG	Pool 13	236	237	2.56509e-05	288	289	1.53769e-05	NA	1	1.63029e-08	36	37	5.98909e-07	NA	NA	NA	NA	NA	NA	NA	NA	NA	NA	NA	NA	NA	NA	NA	1586	1587	8.72426e-05	502	503	2.78803e-05	NA	NA	NA	NA	NA	NA	NA	NA	NA	285	286	8.72197e-06	4	5
IFVMFLTI	ATATTTGTGATGTTCCTCACGATT	Pool 13	1008	1009	0.000109206	992	993	5.28347e-05	456	457	7.45042e-06	14	15	2.42801e-07	NA	NA	NA	NA	NA	NA	NA	NA	NA	NA	NA	NA	NA	NA	NA	2034	2035	0.000111871	3262	3263	0.000180861	NA	NA	NA	NA	NA	NA	NA	NA	NA	234	235	7.16665e-06	383	384
IFWYKGAI	ATATTCTGGTACAAAGGTGCGATT	Pool 13	NA	1	1.08231e-07	NA	1	5.32072e-08	NA	1	1.63029e-08	NA	1	1.61867e-08	NA	NA	NA	NA	NA	NA	NA	NA	NA	NA	NA	NA	NA	NA	NA	2	3	1.6492e-07	NA	1	5.5428e-08	NA	NA	NA	NA	NA	NA	NA	NA	NA	NA	1	3.04964e-08	NA	1
IFYFIQKI	ATTTTCTACTTCATACAGAAGATT	Pool 13	803	804	8.70181e-05	364	365	1.94206e-05	76	77	1.25532e-06	776	777	1.25771e-05	NA	NA	NA	NA	NA	NA	NA	NA	NA	NA	NA	NA	NA	NA	NA	21150	21151	0.00116274	2010	2011	0.000111466	NA	NA	NA	NA	NA	NA	NA	NA	NA	14	15	4.57446e-07	208	209
IFYFVSYI	ATCTTTTACTTCGTGTCGTACATA	Pool 13	275	276	2.98719e-05	160	161	8.56636e-06	72	73	1.19011e-06	32	33	5.34162e-07	NA	NA	NA	NA	NA	NA	NA	NA	NA	NA	NA	NA	NA	NA	NA	1238	1239	6.81119e-05	660	661	3.66379e-05	NA	NA	NA	NA	NA	NA	NA	NA	NA	218	219	6.67871e-06	111	112
IGDLFPAL	ATCGGGGACCTATTCCCCGCCTTG	Pool 13	213	214	2.31615e-05	78	79	4.20337e-06	18	19	3.09755e-07	24	25	4.04668e-07	NA	NA	NA	NA	NA	NA	NA	NA	NA	NA	NA	NA	NA	NA	NA	284	285	1.56674e-05	202	203	1.12519e-05	NA	NA	NA	NA	NA	NA	NA	NA	NA	133	134	4.08652e-06	54	55
IGFFKQKL	ATAGGTTTCTTCAAGCAAAAGTTG	Pool 13	207	208	2.25121e-05	30	31	1.64942e-06	40	41	6.68418e-07	56	57	9.22643e-07	NA	NA	NA	NA	NA	NA	NA	NA	NA	NA	NA	NA	NA	NA	NA	1628	1629	8.95515e-05	452	453	2.51089e-05	NA	NA	NA	NA	NA	NA	NA	NA	NA	9	10	3.04964e-07	82	83
IGFGAMFL	ATCGGTTTCGGTGCCATGTTCCTC	Pool 13	288	289	3.12789e-05	114	115	6.11883e-06	20	21	3.42361e-07	200	201	3.25353e-06	NA	NA	NA	NA	NA	NA	NA	NA	NA	NA	NA	NA	NA	NA	NA	658	659	3.62274e-05	768	769	4.26241e-05	NA	NA	NA	NA	NA	NA	NA	NA	NA	7	8	2.43971e-07	66	67
IGFIPPKL	ATAGGATTTATCCCTCCTAAGCTG	Pool 13	1180	1181	0.000127821	780	781	4.15548e-05	70	71	1.1575e-06	1884	1885	3.0512e-05	NA	NA	NA	NA	NA	NA	NA	NA	NA	NA	NA	NA	NA	NA	NA	3588	3589	0.000197299	3928	3929	0.000217776	NA	NA	NA	NA	NA	NA	NA	NA	NA	1363	1364	4.15971e-05	724	725
IGFLTLIL	ATTGGCTTCCTGACACTTATCCTC	Pool 13	4001	4002	0.000433142	1246	1247	6.63494e-05	1744	1745	2.84485e-05	5314	5315	8.60325e-05	NA	NA	NA	NA	NA	NA	NA	NA	NA	NA	NA	NA	NA	NA	NA	6652	6653	0.000365737	4982	4983	0.000276197	NA	NA	NA	NA	NA	NA	NA	NA	NA	258	259	7.89857e-06	615	616
IGFLYIQA	ATAGGATTCCTGTACATCCAGGCC	Pool 13	1314	1315	0.000142324	10	11	5.85279e-07	4	5	8.15144e-08	118	119	1.92622e-06	NA	NA	NA	NA	NA	NA	NA	NA	NA	NA	NA	NA	NA	NA	NA	586	587	3.22693e-05	626	627	3.47533e-05	NA	NA	NA	NA	NA	NA	NA	NA	NA	2384	2385	7.27339e-05	NA	1
IGFNPGHV	ATCGGGTTTAACCCAGGACACGTT	Pool 13	10	11	1.19055e-06	NA	1	5.32072e-08	NA	1	1.63029e-08	2	3	4.85602e-08	NA	NA	NA	NA	NA	NA	NA	NA	NA	NA	NA	NA	NA	NA	NA	18	19	1.04449e-06	NA	1	5.5428e-08	NA	NA	NA	NA	NA	NA	NA	NA	NA	NA	1	3.04964e-08	2	3
IGFPAPPV	ATAGGATTCCCCGCTCCGCCGGTC	Pool 13	72	73	7.9009e-06	12	13	6.91693e-07	NA	1	1.63029e-08	2	3	4.85602e-08	NA	NA	NA	NA	NA	NA	NA	NA	NA	NA	NA	NA	NA	NA	NA	180	181	9.95017e-06	252	253	1.40233e-05	NA	NA	NA	NA	NA	NA	NA	NA	NA	NA	1	3.04964e-08	NA	1
IGFSYSLG	ATCGGATTCTCGTATTCGCTAGGA	Pool 13	60	61	6.60212e-06	314	315	1.67603e-05	6	7	1.1412e-07	NA	1	1.61867e-08	NA	NA	NA	NA	NA	NA	NA	NA	NA	NA	NA	NA	NA	NA	NA	178	179	9.84022e-06	218	219	1.21387e-05	NA	NA	NA	NA	NA	NA	NA	NA	NA	2	3	9.14892e-08	2	3
IGFTSTTI	ATAGGGTTCACCTCCACAACCATA	Pool 13	761	762	8.24724e-05	40	41	2.18149e-06	78	79	1.28793e-06	3378	3379	5.4695e-05	NA	NA	NA	NA	NA	NA	NA	NA	NA	NA	NA	NA	NA	NA	NA	1092	1093	6.00858e-05	998	999	5.53725e-05	NA	NA	NA	NA	NA	NA	NA	NA	NA	36	37	1.12837e-06	43	44
IGFYINEV	ATCGGATTTTACATAAATGAAGTC	Pool 13	1004	1005	0.000108773	894	895	4.76204e-05	2490	2491	4.06105e-05	1990	1991	3.22278e-05	NA	NA	NA	NA	NA	NA	NA	NA	NA	NA	NA	NA	NA	NA	NA	2674	2675	0.000147054	3564	3565	0.000197601	NA	NA	NA	NA	NA	NA	NA	NA	NA	2162	2163	6.59637e-05	701	702
IGGVLFSL	ATCGGTGGGGTTCTCTTCTCCTTG	Pool 13	21557	21558	0.00233325	186136	186137	0.00990383	524244	524245	0.0085467	2087188	2087189	0.0337848	NA	NA	NA	NA	NA	NA	NA	NA	NA	NA	NA	NA	NA	NA	NA	42170	42171	0.00231828	25966	25967	0.0014393	NA	NA	NA	NA	NA	NA	NA	NA	NA	381966	381967	0.0116486	252160	252161
IGIAMAVL	ATAGGAATCGCTATGGCGGTTCTC	Pool 13	230	231	2.50015e-05	70	71	3.77771e-06	6	7	1.1412e-07	52	53	8.57897e-07	NA	NA	NA	NA	NA	NA	NA	NA	NA	NA	NA	NA	NA	NA	NA	808	809	4.44734e-05	170	171	9.47818e-06	NA	NA	NA	NA	NA	NA	NA	NA	NA	28	29	8.84395e-07	80	81
IGILIASL	ATTGGGATTCTTATCGCAAGTCTA	Pool 13	1184	1185	0.000128254	166	167	8.8856e-06	374	375	6.11358e-06	544	545	8.82177e-06	NA	NA	NA	NA	NA	NA	NA	NA	NA	NA	NA	NA	NA	NA	NA	1446	1447	7.95464e-05	1470	1471	8.15345e-05	NA	NA	NA	NA	NA	NA	NA	NA	NA	72	73	2.22624e-06	168	169
IGILLGFI	ATAGGGATCCTTTTAGGATTCATC	Pool 13	722	723	7.82514e-05	148	149	7.92787e-06	546	547	8.91768e-06	90	91	1.47299e-06	NA	NA	NA	NA	NA	NA	NA	NA	NA	NA	NA	NA	NA	NA	NA	1002	1003	5.51382e-05	1244	1245	6.90078e-05	NA	NA	NA	NA	NA	NA	NA	NA	NA	298	299	9.11842e-06	1134	1135
IGILLGLI	ATCGGTATTCTCCTTGGGCTGATA	Pool 13	946	947	0.000102495	178	179	9.52409e-06	68	69	1.1249e-06	84	85	1.37587e-06	NA	NA	NA	NA	NA	NA	NA	NA	NA	NA	NA	NA	NA	NA	NA	2162	2163	0.000118907	1744	1745	9.67218e-05	NA	NA	NA	NA	NA	NA	NA	NA	NA	27	28	8.53899e-07	209	210
IGILYMVL	ATCGGCATACTTTACATGGTGTTG	Pool 13	132	133	1.43948e-05	6	7	3.7245e-07	4	5	8.15144e-08	NA	1	1.61867e-08	NA	NA	NA	NA	NA	NA	NA	NA	NA	NA	NA	NA	NA	NA	NA	106	107	5.88214e-06	60	61	3.38111e-06	NA	NA	NA	NA	NA	NA	NA	NA	NA	NA	1	3.04964e-08	NA	1
IGIPLFFL	ATTGGTATTCCGCTCTTCTTTCTA	Pool 13	3590	3591	0.000388659	1546	1547	8.23115e-05	1018	1019	1.66126e-05	8048	8049	0.000130287	NA	NA	NA	NA	NA	NA	NA	NA	NA	NA	NA	NA	NA	NA	NA	7104	7105	0.000390585	7948	7949	0.000440597	NA	NA	NA	NA	NA	NA	NA	NA	NA	1080	1081	3.29666e-05	7761	7762
IGIRLNEL	ATTGGGATCAGGCTTAATGAGCTC	Pool 13	563	564	6.10425e-05	154	155	8.24711e-06	124	125	2.03786e-06	174	175	2.83268e-06	NA	NA	NA	NA	NA	NA	NA	NA	NA	NA	NA	NA	NA	NA	NA	1054	1055	5.79968e-05	782	783	4.34001e-05	NA	NA	NA	NA	NA	NA	NA	NA	NA	130	131	3.99503e-06	388	389
IGIYHVLM	ATCGGGATTTACCACGTCCTCATG	Pool 13	299	300	3.24694e-05	352	353	1.87821e-05	72	73	1.19011e-06	44	45	7.28403e-07	NA	NA	NA	NA	NA	NA	NA	NA	NA	NA	NA	NA	NA	NA	NA	900	901	4.95309e-05	2432	2433	0.000134856	NA	NA	NA	NA	NA	NA	NA	NA	NA	511	512	1.56142e-05	75	76
IGKIFSNI	ATCGGCAAAATATTTTCAAATATC	Pool 13	49	50	5.41157e-06	NA	1	5.32072e-08	NA	1	1.63029e-08	4	5	8.09336e-08	NA	NA	NA	NA	NA	NA	NA	NA	NA	NA	NA	NA	NA	NA	NA	76	77	4.23294e-06	28	29	1.60741e-06	NA	NA	NA	NA	NA	NA	NA	NA	NA	2	3	9.14892e-08	2	3
IGKIQANL	ATAGGGAAGATTCAGGCGAATCTA	Pool 13	995	996	0.000107799	1240	1241	6.60301e-05	188	189	3.08124e-06	246	247	3.99812e-06	NA	NA	NA	NA	NA	NA	NA	NA	NA	NA	NA	NA	NA	NA	NA	2262	2263	0.000124405	1590	1591	8.81859e-05	NA	NA	NA	NA	NA	NA	NA	NA	NA	148	149	4.54396e-06	330	331
IGKRFGPF	ATTGGTAAACGATTTGGACCCTTC	Pool 13	154	155	1.67759e-05	284	285	1.5164e-05	20	21	3.42361e-07	4	5	8.09336e-08	NA	NA	NA	NA	NA	NA	NA	NA	NA	NA	NA	NA	NA	NA	NA	870	871	4.78817e-05	490	491	2.72151e-05	NA	NA	NA	NA	NA	NA	NA	NA	NA	2	3	9.14892e-08	66	67
IGLGSAPL	ATCGGTCTAGGGTCCGCACCCCTA	Pool 13	NA	1	1.08231e-07	NA	1	5.32072e-08	NA	1	1.63029e-08	NA	1	1.61867e-08	NA	NA	NA	NA	NA	NA	NA	NA	NA	NA	NA	NA	NA	NA	NA	NA	1	5.49733e-08	NA	1	5.5428e-08	NA	NA	NA	NA	NA	NA	NA	NA	NA	2	3	9.14892e-08	NA	1
IGLHGLGL	ATTGGGCTCCACGGCCTTGGGCTG	Pool 13	9	10	1.08231e-06	2	3	1.59622e-07	NA	1	1.63029e-08	NA	1	1.61867e-08	NA	NA	NA	NA	NA	NA	NA	NA	NA	NA	NA	NA	NA	NA	NA	24	25	1.37433e-06	NA	1	5.5428e-08	NA	NA	NA	NA	NA	NA	NA	NA	NA	NA	1	3.04964e-08	NA	1
IGLPYVEI	ATTGGTTTACCCTACGTGGAGATC	Pool 13	NA	1	1.08231e-07	NA	1	5.32072e-08	NA	1	1.63029e-08	8	9	1.45681e-07	NA	NA	NA	NA	NA	NA	NA	NA	NA	NA	NA	NA	NA	NA	NA	NA	1	5.49733e-08	NA	1	5.5428e-08	NA	NA	NA	NA	NA	NA	NA	NA	NA	NA	1	3.04964e-08	NA	1
IGLRISPL	ATTGGTTTACGTATCTCGCCTCTA	Pool 13	147	148	1.60183e-05	258	259	1.37807e-05	NA	1	1.63029e-08	8	9	1.45681e-07	NA	NA	NA	NA	NA	NA	NA	NA	NA	NA	NA	NA	NA	NA	NA	988	989	5.43686e-05	240	241	1.33581e-05	NA	NA	NA	NA	NA	NA	NA	NA	NA	49	50	1.52482e-06	5	6
IGLWSAFM	ATAGGACTTTGGAGTGCCTTTATG	Pool 13	26	27	2.92225e-06	NA	1	5.32072e-08	NA	1	1.63029e-08	NA	1	1.61867e-08	NA	NA	NA	NA	NA	NA	NA	NA	NA	NA	NA	NA	NA	NA	NA	8	9	4.9476e-07	NA	1	5.5428e-08	NA	NA	NA	NA	NA	NA	NA	NA	NA	NA	1	3.04964e-08	NA	1
IGLYFAWL	ATAGGTCTATATTTTGCGTGGTTA	Pool 13	3208	3209	0.000347315	2600	2601	0.000138392	2974	2975	4.85011e-05	7226	7227	0.000116981	NA	NA	NA	NA	NA	NA	NA	NA	NA	NA	NA	NA	NA	NA	NA	8484	8485	0.000466448	6132	6133	0.00033994	NA	NA	NA	NA	NA	NA	NA	NA	NA	3295	3296	0.000100516	1667	1668
IGMKYRSV	ATAGGTATGAAGTACCGCTCAGTC	Pool 13	3	4	4.32926e-07	2	3	1.59622e-07	8	9	1.46726e-07	NA	1	1.61867e-08	NA	NA	NA	NA	NA	NA	NA	NA	NA	NA	NA	NA	NA	NA	NA	8	9	4.9476e-07	NA	1	5.5428e-08	NA	NA	NA	NA	NA	NA	NA	NA	NA	2	3	9.14892e-08	4	5
IGMLLFTI	ATTGGCATGCTTTTGTTTACAATT	Pool 13	2204	2205	0.00023865	964	965	5.13449e-05	244	245	3.99421e-06	802	803	1.29979e-05	NA	NA	NA	NA	NA	NA	NA	NA	NA	NA	NA	NA	NA	NA	NA	4526	4527	0.000248864	3294	3295	0.000182635	NA	NA	NA	NA	NA	NA	NA	NA	NA	495	496	1.51262e-05	811	812
IGMLNNPM	ATAGGAATGCTAAATAATCCAATG	Pool 13	929	930	0.000100655	404	405	2.15489e-05	800	801	1.30586e-05	604	605	9.79297e-06	NA	NA	NA	NA	NA	NA	NA	NA	NA	NA	NA	NA	NA	NA	NA	2704	2705	0.000148703	1864	1865	0.000103373	NA	NA	NA	NA	NA	NA	NA	NA	NA	176	177	5.39786e-06	326	327
IGPEYKNI	ATTGGGCCTGAATACAAGAACATA	Pool 13	338	339	3.66905e-05	132	133	7.07656e-06	28	29	4.72784e-07	160	161	2.60606e-06	NA	NA	NA	NA	NA	NA	NA	NA	NA	NA	NA	NA	NA	NA	NA	668	669	3.67771e-05	692	693	3.84116e-05	NA	NA	NA	NA	NA	NA	NA	NA	NA	6	7	2.13475e-07	53	54
IGQKFSSL	ATCGGCCAAAAGTTCTCGAGTTTA	Pool 13	104	105	1.13643e-05	62	63	3.35205e-06	32	33	5.37995e-07	8	9	1.45681e-07	NA	NA	NA	NA	NA	NA	NA	NA	NA	NA	NA	NA	NA	NA	NA	306	307	1.68768e-05	1018	1019	5.64811e-05	NA	NA	NA	NA	NA	NA	NA	NA	NA	208	209	6.37375e-06	30	31
IGQQFAQM	ATCGGTCAACAGTTCGCTCAAATG	Pool 13	1223	1224	0.000132475	558	559	2.97428e-05	308	309	5.03759e-06	200	201	3.25353e-06	NA	NA	NA	NA	NA	NA	NA	NA	NA	NA	NA	NA	NA	NA	NA	2576	2577	0.000141666	3474	3475	0.000192612	NA	NA	NA	NA	NA	NA	NA	NA	NA	280	281	8.56949e-06	185	186
IGQRLLTL	ATCGGTCAGCGACTATTGACCCTG	Pool 13	1709	1710	0.000185076	248	249	1.32486e-05	220	221	3.60294e-06	172	173	2.8003e-06	NA	NA	NA	NA	NA	NA	NA	NA	NA	NA	NA	NA	NA	NA	NA	4858	4859	0.000267115	13058	13059	0.000723834	NA	NA	NA	NA	NA	NA	NA	NA	NA	38	39	1.18936e-06	185	186
IGRAIPNL	ATTGGTCGAGCTATACCGAATCTG	Pool 13	281	282	3.05213e-05	174	175	9.31126e-06	NA	1	1.63029e-08	326	327	5.29306e-06	NA	NA	NA	NA	NA	NA	NA	NA	NA	NA	NA	NA	NA	NA	NA	690	691	3.79866e-05	172	173	9.58904e-06	NA	NA	NA	NA	NA	NA	NA	NA	NA	24	25	7.6241e-07	75	76
IGRAVMYL	ATCGGCCGCGCCGTAATGTACTTA	Pool 13	15	16	1.7317e-06	NA	1	5.32072e-08	NA	1	1.63029e-08	2	3	4.85602e-08	NA	NA	NA	NA	NA	NA	NA	NA	NA	NA	NA	NA	NA	NA	NA	30	31	1.70417e-06	NA	1	5.5428e-08	NA	NA	NA	NA	NA	NA	NA	NA	NA	NA	1	3.04964e-08	NA	1
IGSTYQHL	ATCGGTTCTACCTATCAGCATCTG	Pool 13	214	215	2.32698e-05	78	79	4.20337e-06	2	3	4.89086e-08	10	11	1.78054e-07	NA	NA	NA	NA	NA	NA	NA	NA	NA	NA	NA	NA	NA	NA	NA	446	447	2.45731e-05	264	265	1.46884e-05	NA	NA	NA	NA	NA	NA	NA	NA	NA	21	22	6.70921e-07	19	20
IGTFSMNL	ATTGGAACATTCTCCATGAATCTA	Pool 13	664	665	7.19739e-05	738	739	3.93201e-05	16	17	2.77149e-07	1300	1301	2.10589e-05	NA	NA	NA	NA	NA	NA	NA	NA	NA	NA	NA	NA	NA	NA	NA	1708	1709	9.39494e-05	1346	1347	7.46615e-05	NA	NA	NA	NA	NA	NA	NA	NA	NA	620	621	1.89383e-05	13	14
IGTVFEVL	ATAGGGACCGTGTTCGAGGTGCTT	Pool 13	298	299	3.23612e-05	2504	2505	0.000133284	7400	7401	0.000120658	68716	68717	0.0011123	NA	NA	NA	NA	NA	NA	NA	NA	NA	NA	NA	NA	NA	NA	NA	656	657	3.61175e-05	690	691	3.83007e-05	NA	NA	NA	NA	NA	NA	NA	NA	NA	10278	10279	0.000313472	3903	3904
IGVFNASV	ATCGGGGTCTTCAACGCATCCGTC	Pool 13	304	305	3.30106e-05	260	261	1.38871e-05	94	95	1.54877e-06	102	103	1.66723e-06	NA	NA	NA	NA	NA	NA	NA	NA	NA	NA	NA	NA	NA	NA	NA	6508	6509	0.000357821	746	747	4.14047e-05	NA	NA	NA	NA	NA	NA	NA	NA	NA	NA	1	3.04964e-08	8	9
IGVFSPSL	ATAGGAGTCTTCTCGCCAAGCCTT	Pool 13	1974	1975	0.000213757	604	605	3.21904e-05	64	65	1.05969e-06	1920	1921	3.10947e-05	NA	NA	NA	NA	NA	NA	NA	NA	NA	NA	NA	NA	NA	NA	NA	4130	4131	0.000227095	3080	3081	0.000170774	NA	NA	NA	NA	NA	NA	NA	NA	NA	411	412	1.25645e-05	943	944
IGWGFPAV	ATAGGGTGGGGATTCCCCGCAGTT	Pool 13	57	58	6.27743e-06	NA	1	5.32072e-08	NA	1	1.63029e-08	2	3	4.85602e-08	NA	NA	NA	NA	NA	NA	NA	NA	NA	NA	NA	NA	NA	NA	NA	244	245	1.34685e-05	130	131	7.26106e-06	NA	NA	NA	NA	NA	NA	NA	NA	NA	5	6	1.82978e-07	12	13
IGYASSSL	ATTGGGTACGCGTCTAGTTCTTTA	Pool 13	755	756	8.1823e-05	624	625	3.32545e-05	306	307	5.00498e-06	348	349	5.64917e-06	NA	NA	NA	NA	NA	NA	NA	NA	NA	NA	NA	NA	NA	NA	NA	1692	1693	9.30698e-05	3022	3023	0.000167559	NA	NA	NA	NA	NA	NA	NA	NA	NA	25	26	7.92906e-07	187	188
IGYDIYNI	ATCGGGTATGATATCTATAATATA	Pool 13	866	867	9.38367e-05	342	343	1.82501e-05	392	393	6.40703e-06	522	523	8.46566e-06	NA	NA	NA	NA	NA	NA	NA	NA	NA	NA	NA	NA	NA	NA	NA	2788	2789	0.000153321	5472	5473	0.000303357	NA	NA	NA	NA	NA	NA	NA	NA	NA	150	151	4.60496e-06	244	245
IGYFSLFL	ATTGGGTACTTCTCTCTATTTCTG	Pool 13	146	147	1.591e-05	114	115	6.11883e-06	80	81	1.32053e-06	192	193	3.12404e-06	NA	NA	NA	NA	NA	NA	NA	NA	NA	NA	NA	NA	NA	NA	NA	364	365	2.00653e-05	338	339	1.87901e-05	NA	NA	NA	NA	NA	NA	NA	NA	NA	59	60	1.82978e-06	16	17
IGYQVTAM	ATAGGCTATCAGGTTACCGCGATG	Pool 13	96	97	1.04985e-05	80	81	4.30978e-06	28	29	4.72784e-07	24	25	4.04668e-07	NA	NA	NA	NA	NA	NA	NA	NA	NA	NA	NA	NA	NA	NA	NA	388	389	2.13846e-05	260	261	1.44667e-05	NA	NA	NA	NA	NA	NA	NA	NA	NA	NA	1	3.04964e-08	NA	1
IGYVYRLP	ATTGGGTACGTCTACCGACTTCCA	Pool 13	532	533	5.76874e-05	302	303	1.61218e-05	210	211	3.43991e-06	296	297	4.80746e-06	NA	NA	NA	NA	NA	NA	NA	NA	NA	NA	NA	NA	NA	NA	NA	1498	1499	8.2405e-05	3642	3643	0.000201924	NA	NA	NA	NA	NA	NA	NA	NA	NA	857	858	2.61659e-05	547	548
IHFFYLSV	ATTCACTTCTTCTACTTATCCGTT	Pool 13	3866	3867	0.000418531	2838	2839	0.000151055	808	809	1.3189e-05	1346	1347	2.18035e-05	NA	NA	NA	NA	NA	NA	NA	NA	NA	NA	NA	NA	NA	NA	NA	13938	13939	0.000766273	14566	14567	0.000807419	NA	NA	NA	NA	NA	NA	NA	NA	NA	798	799	2.43666e-05	820	821
IHFVRVLF	ATACACTTTGTAAGAGTACTATTT	Pool 13	145	146	1.58018e-05	30	31	1.64942e-06	8	9	1.46726e-07	234	235	3.80388e-06	NA	NA	NA	NA	NA	NA	NA	NA	NA	NA	NA	NA	NA	NA	NA	422	423	2.32537e-05	272	273	1.51318e-05	NA	NA	NA	NA	NA	NA	NA	NA	NA	3	4	1.21986e-07	8	9
IHHFYCDV	ATACATCACTTTTATTGTGATGTG	Pool 13	205	206	2.22957e-05	124	125	6.6509e-06	36	37	6.03207e-07	284	285	4.61322e-06	NA	NA	NA	NA	NA	NA	NA	NA	NA	NA	NA	NA	NA	NA	NA	746	747	4.10651e-05	318	319	1.76815e-05	NA	NA	NA	NA	NA	NA	NA	NA	NA	3	4	1.21986e-07	105	106
IHMLFCAL	ATACATATGCTGTTTTGCGCTCTG	Pool 13	1451	1452	0.000157152	768	769	4.09163e-05	798	799	1.3026e-05	17370	17371	0.00028118	NA	NA	NA	NA	NA	NA	NA	NA	NA	NA	NA	NA	NA	NA	NA	5490	5491	0.000301858	2930	2931	0.000162459	NA	NA	NA	NA	NA	NA	NA	NA	NA	1546	1547	4.71779e-05	721	722
IHMVELYL	ATACACATGGTTGAACTCTATCTA	Pool 13	26023	26024	0.00281662	1210	1211	6.44339e-05	1094	1095	1.78517e-05	4610	4611	7.4637e-05	NA	NA	NA	NA	NA	NA	NA	NA	NA	NA	NA	NA	NA	NA	NA	5780	5781	0.000317801	3624	3625	0.000200926	NA	NA	NA	NA	NA	NA	NA	NA	NA	379	380	1.15886e-05	1916	1917
IHNFSPLL	ATCCACAATTTCTCTCCGTTACTA	Pool 13	683	684	7.40303e-05	430	431	2.29323e-05	50	51	8.31447e-07	56	57	9.22643e-07	NA	NA	NA	NA	NA	NA	NA	NA	NA	NA	NA	NA	NA	NA	NA	888	889	4.88713e-05	1734	1735	9.61675e-05	NA	NA	NA	NA	NA	NA	NA	NA	NA	37	38	1.15886e-06	30	31
IHYFRKEL	ATACATTATTTCCGGAAGGAGTTA	Pool 13	20147	20148	0.00218065	694	695	3.6979e-05	174	175	2.853e-06	772	773	1.25123e-05	NA	NA	NA	NA	NA	NA	NA	NA	NA	NA	NA	NA	NA	NA	NA	1952	1953	0.000107363	1502	1503	8.33082e-05	NA	NA	NA	NA	NA	NA	NA	NA	NA	244	245	7.47162e-06	3398	3399
IHYHLQLI	ATCCATTATCATCTACAGTTGATC	Pool 13	NA	1	1.08231e-07	NA	1	5.32072e-08	NA	1	1.63029e-08	NA	1	1.61867e-08	NA	NA	NA	NA	NA	NA	NA	NA	NA	NA	NA	NA	NA	NA	NA	NA	1	5.49733e-08	NA	1	5.5428e-08	NA	NA	NA	NA	NA	NA	NA	NA	NA	NA	1	3.04964e-08	NA	1
IHYRLRLV	ATCCATTACCGTCTGAGACTGGTC	Pool 13	692	693	7.50044e-05	28	29	1.54301e-06	22	23	3.74966e-07	436	437	7.0736e-06	NA	NA	NA	NA	NA	NA	NA	NA	NA	NA	NA	NA	NA	NA	NA	1170	1171	6.43737e-05	676	677	3.75247e-05	NA	NA	NA	NA	NA	NA	NA	NA	NA	33	34	1.03688e-06	165	166
IIADFTGV	ATAATTGCTGATTTCACTGGAGTC	Pool 13	NA	1	1.08231e-07	NA	1	5.32072e-08	NA	1	1.63029e-08	NA	1	1.61867e-08	NA	NA	NA	NA	NA	NA	NA	NA	NA	NA	NA	NA	NA	NA	NA	NA	1	5.49733e-08	NA	1	5.5428e-08	NA	NA	NA	NA	NA	NA	NA	NA	NA	NA	1	3.04964e-08	NA	1
IIASYAFI	ATTATTGCTAGTTACGCGTTTATT	Pool 13	3620	3621	0.000391906	3564	3565	0.000189684	1878	1879	3.06331e-05	2586	2587	4.18751e-05	NA	NA	NA	NA	NA	NA	NA	NA	NA	NA	NA	NA	NA	NA	NA	8546	8547	0.000469857	7554	7555	0.000418758	NA	NA	NA	NA	NA	NA	NA	NA	NA	2364	2365	7.2124e-05	1820	1821
IICSFRRI	ATTATATGTTCGTTCCGTCGAATA	Pool 13	1546	1547	0.000167434	1262	1263	6.72007e-05	168	169	2.75519e-06	428	429	6.94411e-06	NA	NA	NA	NA	NA	NA	NA	NA	NA	NA	NA	NA	NA	NA	NA	3668	3669	0.000201697	4484	4485	0.000248594	NA	NA	NA	NA	NA	NA	NA	NA	NA	96	97	2.95815e-06	824	825
IIFAFWVV	ATAATCTTTGCATTTTGGGTGGTT	Pool 13	740	741	8.01995e-05	4010	4011	0.000213414	254	255	4.15723e-06	10272	10273	0.000166286	NA	NA	NA	NA	NA	NA	NA	NA	NA	NA	NA	NA	NA	NA	NA	2626	2627	0.000144415	2302	2303	0.000127651	NA	NA	NA	NA	NA	NA	NA	NA	NA	2238	2239	6.82814e-05	798	799
IIFHAFFI	ATCATATTTCACGCCTTCTTCATT	Pool 13	1180	1181	0.000127821	1284	1285	6.83712e-05	498	499	8.13514e-06	178	179	2.89742e-06	NA	NA	NA	NA	NA	NA	NA	NA	NA	NA	NA	NA	NA	NA	NA	5942	5943	0.000326706	2312	2313	0.000128205	NA	NA	NA	NA	NA	NA	NA	NA	NA	67	68	2.07375e-06	378	379
IIFISLVL	ATAATATTCATTTCACTGGTCCTC	Pool 13	3621	3622	0.000392014	2124	2125	0.000113065	496	497	8.10253e-06	8378	8379	0.000135629	NA	NA	NA	NA	NA	NA	NA	NA	NA	NA	NA	NA	NA	NA	NA	6294	6295	0.000346057	4574	4575	0.000253583	NA	NA	NA	NA	NA	NA	NA	NA	NA	5256	5257	0.00016032	2166	2167
IIFLLIYI	ATAATCTTTCTACTTATTTATATC	Pool 13	3100	3101	0.000335626	3940	3941	0.00020969	5252	5253	8.5639e-05	33332	33333	0.000539552	NA	NA	NA	NA	NA	NA	NA	NA	NA	NA	NA	NA	NA	NA	NA	10676	10677	0.00058695	9384	9385	0.000520191	NA	NA	NA	NA	NA	NA	NA	NA	NA	5200	5201	0.000158612	4378	4379
IIFLTTLF	ATAATCTTTCTAACGACTTTGTTT	Pool 13	568	569	6.15837e-05	84	85	4.52261e-06	82	83	1.35314e-06	28	29	4.69415e-07	NA	NA	NA	NA	NA	NA	NA	NA	NA	NA	NA	NA	NA	NA	NA	1422	1423	7.8227e-05	1032	1033	5.72571e-05	NA	NA	NA	NA	NA	NA	NA	NA	NA	8	9	2.74468e-07	72	73
IIFLVQLM	ATTATCTTCCTTGTTCAACTAATG	Pool 13	1212	1213	0.000131285	874	875	4.65563e-05	572	573	9.34155e-06	764	765	1.23828e-05	NA	NA	NA	NA	NA	NA	NA	NA	NA	NA	NA	NA	NA	NA	NA	3164	3165	0.000173991	4510	4511	0.000250036	NA	NA	NA	NA	NA	NA	NA	NA	NA	644	645	1.96702e-05	367	368
IIFRQESF	ATAATTTTCCGCCAGGAATCTTTT	Pool 13	58	59	6.38566e-06	62	63	3.35205e-06	18	19	3.09755e-07	2	3	4.85602e-08	NA	NA	NA	NA	NA	NA	NA	NA	NA	NA	NA	NA	NA	NA	NA	180	181	9.95017e-06	666	667	3.69704e-05	NA	NA	NA	NA	NA	NA	NA	NA	NA	5	6	1.82978e-07	14	15
IIFSIISL	ATCATCTTCTCTATTATATCTCTA	Pool 13	4269	4270	0.000462148	32374	32375	0.00172258	1694	1695	2.76334e-05	2470	2471	3.99974e-05	NA	NA	NA	NA	NA	NA	NA	NA	NA	NA	NA	NA	NA	NA	NA	9334	9335	0.000513176	8522	8523	0.000472412	NA	NA	NA	NA	NA	NA	NA	NA	NA	3588	3589	0.000109452	3500	3501
IIFSNGEL	ATTATATTTTCCAACGGCGAGTTG	Pool 13	434	435	4.70807e-05	62	63	3.35205e-06	50	51	8.31447e-07	68	69	1.11688e-06	NA	NA	NA	NA	NA	NA	NA	NA	NA	NA	NA	NA	NA	NA	NA	696	697	3.83164e-05	1160	1161	6.43519e-05	NA	NA	NA	NA	NA	NA	NA	NA	NA	33	34	1.03688e-06	22	23
IIFSYTRI	ATAATCTTTTCTTACACGCGGATT	Pool 13	318	319	3.45258e-05	128	129	6.86373e-06	620	621	1.01241e-05	18	19	3.07548e-07	NA	NA	NA	NA	NA	NA	NA	NA	NA	NA	NA	NA	NA	NA	NA	712	713	3.9196e-05	648	649	3.59727e-05	NA	NA	NA	NA	NA	NA	NA	NA	NA	39	40	1.21986e-06	158	159
IIFYRDGV	ATCATTTTCTACCGTGATGGCGTA	Pool 13	118	119	1.28795e-05	56	57	3.03281e-06	20	21	3.42361e-07	6	7	1.13307e-07	NA	NA	NA	NA	NA	NA	NA	NA	NA	NA	NA	NA	NA	NA	NA	362	363	1.99553e-05	260	261	1.44667e-05	NA	NA	NA	NA	NA	NA	NA	NA	NA	16	17	5.18439e-07	53	54
IIHRHKPM	ATCATTCACCGCCATAAACCAATG	Pool 13	233	234	2.53262e-05	482	483	2.56991e-05	122	123	2.00525e-06	102	103	1.66723e-06	NA	NA	NA	NA	NA	NA	NA	NA	NA	NA	NA	NA	NA	NA	NA	752	753	4.13949e-05	500	501	2.77694e-05	NA	NA	NA	NA	NA	NA	NA	NA	NA	23	24	7.31913e-07	235	236
IIHRYFDF	ATTATACATCGGTATTTTGACTTT	Pool 13	133	134	1.4503e-05	182	183	9.73692e-06	62	63	1.02708e-06	52	53	8.57897e-07	NA	NA	NA	NA	NA	NA	NA	NA	NA	NA	NA	NA	NA	NA	NA	640	641	3.52379e-05	222	223	1.23604e-05	NA	NA	NA	NA	NA	NA	NA	NA	NA	4	5	1.52482e-07	36	37
IIILTGLL	ATAATAATCTTGACCGGATTACTT	Pool 13	152	153	1.65594e-05	30	31	1.64942e-06	2	3	4.89086e-08	10	11	1.78054e-07	NA	NA	NA	NA	NA	NA	NA	NA	NA	NA	NA	NA	NA	NA	NA	450	451	2.4793e-05	526	527	2.92105e-05	NA	NA	NA	NA	NA	NA	NA	NA	NA	14	15	4.57446e-07	NA	1
IIISHVRL	ATTATCATTTCGCACGTTCGTCTC	Pool 13	1338	1339	0.000144922	1034	1035	5.50694e-05	290	291	4.74414e-06	416	417	6.74987e-06	NA	NA	NA	NA	NA	NA	NA	NA	NA	NA	NA	NA	NA	NA	NA	4812	4813	0.000264587	3276	3277	0.000181637	NA	NA	NA	NA	NA	NA	NA	NA	NA	107	108	3.29361e-06	182	183
IIKAFRNI	ATAATCAAGGCGTTTCGAAACATC	Pool 13	3	4	4.32926e-07	NA	1	5.32072e-08	24	25	4.07572e-07	NA	1	1.61867e-08	NA	NA	NA	NA	NA	NA	NA	NA	NA	NA	NA	NA	NA	NA	NA	94	95	5.22246e-06	42	43	2.3834e-06	NA	NA	NA	NA	NA	NA	NA	NA	NA	3	4	1.21986e-07	25	26
IIKTHLPL	ATTATTAAGACTCATTTACCGTTA	Pool 13	2381	2382	0.000257807	1988	1989	0.000105829	58	59	9.6187e-07	680	681	1.10232e-05	NA	NA	NA	NA	NA	NA	NA	NA	NA	NA	NA	NA	NA	NA	NA	1194	1195	6.56931e-05	2956	2957	0.0001639	NA	NA	NA	NA	NA	NA	NA	NA	NA	386	387	1.18021e-05	82	83
IILETIRL	ATAATTCTGGAAACCATTAGGCTC	Pool 13	1111	1112	0.000120353	626	627	3.33609e-05	172	173	2.8204e-06	2558	2559	4.14218e-05	NA	NA	NA	NA	NA	NA	NA	NA	NA	NA	NA	NA	NA	NA	NA	2900	2901	0.000159478	3230	3231	0.000179088	NA	NA	NA	NA	NA	NA	NA	NA	NA	3730	3731	0.000113782	664	665
IILFYQKV	ATTATTTTGTTTTATCAGAAAGTG	Pool 13	2003	2004	0.000216896	956	957	5.09193e-05	78	79	1.28793e-06	160	161	2.60606e-06	NA	NA	NA	NA	NA	NA	NA	NA	NA	NA	NA	NA	NA	NA	NA	3140	3141	0.000172671	4730	4731	0.00026223	NA	NA	NA	NA	NA	NA	NA	NA	NA	124	125	3.81205e-06	207	208
IILGSYLL	ATTATATTGGGGTCCTACCTTCTA	Pool 13	161	162	1.75335e-05	92	93	4.94827e-06	34	35	5.70601e-07	876	877	1.41958e-05	NA	NA	NA	NA	NA	NA	NA	NA	NA	NA	NA	NA	NA	NA	NA	552	553	3.04002e-05	464	465	2.5774e-05	NA	NA	NA	NA	NA	NA	NA	NA	NA	78	79	2.40921e-06	36	37
IILIFYSL	ATAATCTTGATATTCTACAGTCTA	Pool 13	5783	5784	0.000626011	1346	1347	7.16701e-05	104	105	1.7118e-06	480	481	7.78582e-06	NA	NA	NA	NA	NA	NA	NA	NA	NA	NA	NA	NA	NA	NA	NA	13042	13043	0.000717017	5130	5131	0.000284401	NA	NA	NA	NA	NA	NA	NA	NA	NA	442	443	1.35099e-05	1599	1600
IILLFFVM	ATTATACTATTGTTCTTCGTGATG	Pool 13	6101	6102	0.000660428	7236	7237	0.00038506	33710	33711	0.000549586	43704	43705	0.000707441	NA	NA	NA	NA	NA	NA	NA	NA	NA	NA	NA	NA	NA	NA	NA	15588	15589	0.000856979	19692	19693	0.00109154	NA	NA	NA	NA	NA	NA	NA	NA	NA	18038	18039	0.000550124	22879	22880
IILLLAYV	ATCATTTTATTATTAGCTTATGTC	Pool 13	671	672	7.27315e-05	500	501	2.66568e-05	300	301	4.90717e-06	1506	1507	2.43934e-05	NA	NA	NA	NA	NA	NA	NA	NA	NA	NA	NA	NA	NA	NA	NA	1832	1833	0.000100766	4670	4671	0.000258904	NA	NA	NA	NA	NA	NA	NA	NA	NA	201	202	6.16027e-06	91	92
IILLNFCL	ATAATCCTCTTGAACTTTTGTTTA	Pool 13	725	726	7.8576e-05	1646	1647	8.76322e-05	540	541	8.81986e-06	672	673	1.08937e-05	NA	NA	NA	NA	NA	NA	NA	NA	NA	NA	NA	NA	NA	NA	NA	2542	2543	0.000139797	2778	2779	0.000154034	NA	NA	NA	NA	NA	NA	NA	NA	NA	52	53	1.61631e-06	173	174
IILNFRTT	ATAATACTTAATTTTCGTACAACA	Pool 13	213	214	2.31615e-05	26	27	1.43659e-06	4	5	8.15144e-08	8	9	1.45681e-07	NA	NA	NA	NA	NA	NA	NA	NA	NA	NA	NA	NA	NA	NA	NA	1376	1377	7.56982e-05	632	633	3.50859e-05	NA	NA	NA	NA	NA	NA	NA	NA	NA	31	32	9.75885e-07	33	34
IILPPTRL	ATCATTCTCCCTCCCACGCGGCTG	Pool 13	325	326	3.52835e-05	236	237	1.26101e-05	2	3	4.89086e-08	38	39	6.31282e-07	NA	NA	NA	NA	NA	NA	NA	NA	NA	NA	NA	NA	NA	NA	NA	72	73	4.01305e-06	164	165	9.14561e-06	NA	NA	NA	NA	NA	NA	NA	NA	NA	18	19	5.79431e-07	11	12
IILSLLPM	ATTATCCTATCTCTACTACCAATG	Pool 13	1041	1042	0.000112777	560	561	2.98492e-05	184	185	3.01603e-06	2366	2367	3.8314e-05	NA	NA	NA	NA	NA	NA	NA	NA	NA	NA	NA	NA	NA	NA	NA	3046	3047	0.000167504	4348	4349	0.000241056	NA	NA	NA	NA	NA	NA	NA	NA	NA	342	343	1.04603e-05	432	433
IILSYCKI	ATCATACTAAGCTATTGCAAGATA	Pool 13	155	156	1.68841e-05	98	99	5.26751e-06	424	425	6.92872e-06	48	49	7.9315e-07	NA	NA	NA	NA	NA	NA	NA	NA	NA	NA	NA	NA	NA	NA	NA	448	449	2.4683e-05	128	129	7.15021e-06	NA	NA	NA	NA	NA	NA	NA	NA	NA	38	39	1.18936e-06	90	91
IILTESLL	ATAATACTGACGGAGAGTCTCTTA	Pool 13	714	715	7.73855e-05	1838	1839	9.7848e-05	122	123	2.00525e-06	158	159	2.57369e-06	NA	NA	NA	NA	NA	NA	NA	NA	NA	NA	NA	NA	NA	NA	NA	1214	1215	6.67926e-05	1512	1513	8.38625e-05	NA	NA	NA	NA	NA	NA	NA	NA	NA	251	252	7.68509e-06	141	142
IILVSSSL	ATCATTCTTGTCTCTAGTTCACTA	Pool 13	263	264	2.85731e-05	748	749	3.98522e-05	254	255	4.15723e-06	766	767	1.24152e-05	NA	NA	NA	NA	NA	NA	NA	NA	NA	NA	NA	NA	NA	NA	NA	570	571	3.13898e-05	950	951	5.2712e-05	NA	NA	NA	NA	NA	NA	NA	NA	NA	17	18	5.48935e-07	20	21
IIMASGEL	ATTATTATGGCTTCTGGCGAACTA	Pool 13	932	933	0.00010098	928	929	4.94295e-05	1280	1281	2.0884e-05	1790	1791	2.89904e-05	NA	NA	NA	NA	NA	NA	NA	NA	NA	NA	NA	NA	NA	NA	NA	2698	2699	0.000148373	2980	2981	0.000165231	NA	NA	NA	NA	NA	NA	NA	NA	NA	308	309	9.42338e-06	105	106
IIMILYHL	ATCATCATGATTCTATATCATCTC	Pool 13	NA	1	1.08231e-07	NA	1	5.32072e-08	NA	1	1.63029e-08	6	7	1.13307e-07	NA	NA	NA	NA	NA	NA	NA	NA	NA	NA	NA	NA	NA	NA	NA	2	3	1.6492e-07	2	3	1.66284e-07	NA	NA	NA	NA	NA	NA	NA	NA	NA	NA	1	3.04964e-08	NA	1
IINIFTFL	ATAATAAACATTTTCACATTTCTC	Pool 13	512	513	5.55227e-05	278	279	1.48448e-05	102	103	1.6792e-06	350	351	5.68154e-06	NA	NA	NA	NA	NA	NA	NA	NA	NA	NA	NA	NA	NA	NA	NA	958	959	5.27194e-05	1826	1827	0.000101267	NA	NA	NA	NA	NA	NA	NA	NA	NA	327	328	1.00028e-05	126	127
IIPMINPL	ATTATACCCATGATCAATCCTCTG	Pool 13	278	279	3.01966e-05	54	55	2.9264e-06	34	35	5.70601e-07	20	21	3.39921e-07	NA	NA	NA	NA	NA	NA	NA	NA	NA	NA	NA	NA	NA	NA	NA	1008	1009	5.54681e-05	1072	1073	5.94742e-05	NA	NA	NA	NA	NA	NA	NA	NA	NA	30	31	9.45388e-07	25	26
IIPPAAPL	ATAATCCCACCCGCCGCCCCTCTC	Pool 13	52	53	5.73627e-06	22	23	1.22377e-06	NA	1	1.63029e-08	4	5	8.09336e-08	NA	NA	NA	NA	NA	NA	NA	NA	NA	NA	NA	NA	NA	NA	NA	128	129	7.09156e-06	226	227	1.25821e-05	NA	NA	NA	NA	NA	NA	NA	NA	NA	NA	1	3.04964e-08	NA	1
IIPRYRNF	ATTATACCTAGGTACCGGAATTTC	Pool 13	651	652	7.05669e-05	898	899	4.78333e-05	78	79	1.28793e-06	592	593	9.59873e-06	NA	NA	NA	NA	NA	NA	NA	NA	NA	NA	NA	NA	NA	NA	NA	1548	1549	8.51536e-05	1798	1799	9.97149e-05	NA	NA	NA	NA	NA	NA	NA	NA	NA	124	125	3.81205e-06	140	141
IIPTIPLL	ATCATCCCGACAATACCGCTGCTC	Pool 13	116	117	1.26631e-05	132	133	7.07656e-06	8	9	1.46726e-07	6	7	1.13307e-07	NA	NA	NA	NA	NA	NA	NA	NA	NA	NA	NA	NA	NA	NA	NA	336	337	1.8526e-05	462	463	2.56631e-05	NA	NA	NA	NA	NA	NA	NA	NA	NA	234	235	7.16665e-06	49	50
IIPWNGPL	ATAATCCCCTGGAATGGACCGCTG	Pool 13	209	210	2.27286e-05	76	77	4.09695e-06	2	3	4.89086e-08	4	5	8.09336e-08	NA	NA	NA	NA	NA	NA	NA	NA	NA	NA	NA	NA	NA	NA	NA	330	331	1.81962e-05	200	201	1.1141e-05	NA	NA	NA	NA	NA	NA	NA	NA	NA	NA	1	3.04964e-08	1	2
IIQEFPEI	ATTATCCAGGAGTTTCCTGAGATC	Pool 13	1198	1199	0.00012977	968	969	5.15578e-05	122	123	2.00525e-06	47488	47489	0.000768692	NA	NA	NA	NA	NA	NA	NA	NA	NA	NA	NA	NA	NA	NA	NA	3148	3149	0.000173111	3616	3617	0.000200483	NA	NA	NA	NA	NA	NA	NA	NA	NA	943	944	2.87886e-05	1541	1542
IIRFFSKM	ATCATTCGATTCTTCTCAAAGATG	Pool 13	345	346	3.74481e-05	122	123	6.54448e-06	22	23	3.74966e-07	44	45	7.28403e-07	NA	NA	NA	NA	NA	NA	NA	NA	NA	NA	NA	NA	NA	NA	NA	1058	1059	5.82167e-05	558	559	3.09842e-05	NA	NA	NA	NA	NA	NA	NA	NA	NA	16	17	5.18439e-07	28	29
IIRGLYHL	ATAATTAGAGGCTTATACCATTTG	Pool 13	261	262	2.83566e-05	32	33	1.75584e-06	NA	1	1.63029e-08	4	5	8.09336e-08	NA	NA	NA	NA	NA	NA	NA	NA	NA	NA	NA	NA	NA	NA	NA	772	773	4.24944e-05	1554	1555	8.61905e-05	NA	NA	NA	NA	NA	NA	NA	NA	NA	28	29	8.84395e-07	360	361
IISLLSQL	ATAATATCGCTGCTCTCACAGTTG	Pool 13	323	324	3.5067e-05	4	5	2.66036e-07	NA	1	1.63029e-08	4	5	8.09336e-08	NA	NA	NA	NA	NA	NA	NA	NA	NA	NA	NA	NA	NA	NA	NA	158	159	8.74076e-06	580	581	3.22036e-05	NA	NA	NA	NA	NA	NA	NA	NA	NA	2	3	9.14892e-08	2	3
IISVFYTI	ATTATAAGCGTATTCTACACTATA	Pool 13	236	237	2.56509e-05	156	157	8.35353e-06	120	121	1.97265e-06	20	21	3.39921e-07	NA	NA	NA	NA	NA	NA	NA	NA	NA	NA	NA	NA	NA	NA	NA	602	603	3.31489e-05	468	469	2.59957e-05	NA	NA	NA	NA	NA	NA	NA	NA	NA	3	4	1.21986e-07	91	92
IITFFTFL	ATCATAACCTTCTTCACATTTCTC	Pool 13	1720	1721	0.000186266	272	273	1.45256e-05	76	77	1.25532e-06	172	173	2.8003e-06	NA	NA	NA	NA	NA	NA	NA	NA	NA	NA	NA	NA	NA	NA	NA	3122	3123	0.000171682	3168	3169	0.000175651	NA	NA	NA	NA	NA	NA	NA	NA	NA	83	84	2.5617e-06	343	344
IIVGMFLL	ATAATCGTGGGCATGTTCCTATTG	Pool 13	424	425	4.59984e-05	130	131	6.97014e-06	242	243	3.9616e-06	622	623	1.00843e-05	NA	NA	NA	NA	NA	NA	NA	NA	NA	NA	NA	NA	NA	NA	NA	1562	1563	8.59233e-05	1532	1533	8.49711e-05	NA	NA	NA	NA	NA	NA	NA	NA	NA	24	25	7.6241e-07	58	59
IIVLSTLL	ATTATTGTCCTGTCCACTCTGTTA	Pool 13	1	2	2.16463e-07	2	3	1.59622e-07	2	3	4.89086e-08	2	3	4.85602e-08	NA	NA	NA	NA	NA	NA	NA	NA	NA	NA	NA	NA	NA	NA	NA	NA	1	5.49733e-08	4	5	2.7714e-07	NA	NA	NA	NA	NA	NA	NA	NA	NA	NA	1	3.04964e-08	1	2
IIVMLYHL	ATCATCGTGATGCTTTATCACTTG	Pool 13	2337	2338	0.000253045	1490	1491	7.93319e-05	664	665	1.08414e-05	70054	70055	0.00113396	NA	NA	NA	NA	NA	NA	NA	NA	NA	NA	NA	NA	NA	NA	NA	3624	3625	0.000199278	2318	2319	0.000128537	NA	NA	NA	NA	NA	NA	NA	NA	NA	1365	1366	4.16581e-05	2052	2053
IIVNFPSF	ATTATAGTGAACTTCCCTTCTTTC	Pool 13	3881	3882	0.000420155	98	99	5.26751e-06	138	139	2.2661e-06	910	911	1.47461e-05	NA	NA	NA	NA	NA	NA	NA	NA	NA	NA	NA	NA	NA	NA	NA	1750	1751	9.62583e-05	35080	35081	0.00194447	NA	NA	NA	NA	NA	NA	NA	NA	NA	24	25	7.6241e-07	56	57
IIVSFVNA	ATTATTGTGTCCTTCGTAAATGCC	Pool 13	570	571	6.18002e-05	964	965	5.13449e-05	8	9	1.46726e-07	872	873	1.4131e-05	NA	NA	NA	NA	NA	NA	NA	NA	NA	NA	NA	NA	NA	NA	NA	346	347	1.90757e-05	276	277	1.53535e-05	NA	NA	NA	NA	NA	NA	NA	NA	NA	51	52	1.58581e-06	228	229
IIVSSYAL	ATTATCGTTAGTAGCTACGCTTTG	Pool 13	1275	1276	0.000138103	372	373	1.98463e-05	58	59	9.6187e-07	58	59	9.55017e-07	NA	NA	NA	NA	NA	NA	NA	NA	NA	NA	NA	NA	NA	NA	NA	3526	3527	0.000193891	2100	2101	0.000116454	NA	NA	NA	NA	NA	NA	NA	NA	NA	565	566	1.7261e-05	160	161
IIVSYFHI	ATCATTGTGAGTTACTTCCATATA	Pool 13	5861	5862	0.000634453	6386	6387	0.000339834	2028	2029	3.30785e-05	33832	33833	0.000547646	NA	NA	NA	NA	NA	NA	NA	NA	NA	NA	NA	NA	NA	NA	NA	11486	11487	0.000631478	10248	10249	0.000568081	NA	NA	NA	NA	NA	NA	NA	NA	NA	1388	1389	4.23595e-05	4149	4150
IIVVIQNL	ATTATAGTTGTCATTCAAAACCTA	Pool 13	40	41	4.43749e-06	6	7	3.7245e-07	8	9	1.46726e-07	2	3	4.85602e-08	NA	NA	NA	NA	NA	NA	NA	NA	NA	NA	NA	NA	NA	NA	NA	180	181	9.95017e-06	186	187	1.0365e-05	NA	NA	NA	NA	NA	NA	NA	NA	NA	3	4	1.21986e-07	5	6
IIWHSLAL	ATAATATGGCATAGCTTAGCGCTT	Pool 13	802	803	8.69099e-05	288	289	1.53769e-05	124	125	2.03786e-06	386	387	6.26426e-06	NA	NA	NA	NA	NA	NA	NA	NA	NA	NA	NA	NA	NA	NA	NA	2180	2181	0.000119897	3598	3599	0.000199485	NA	NA	NA	NA	NA	NA	NA	NA	NA	513	514	1.56751e-05	383	384
IIWLKENL	ATAATATGGCTTAAAGAGAATCTT	Pool 13	295	296	3.20365e-05	336	337	1.79308e-05	164	165	2.68998e-06	240	241	3.901e-06	NA	NA	NA	NA	NA	NA	NA	NA	NA	NA	NA	NA	NA	NA	NA	1884	1885	0.000103625	1278	1279	7.08924e-05	NA	NA	NA	NA	NA	NA	NA	NA	NA	725	726	2.21404e-05	327	328
IIWQCALL	ATCATATGGCAATGTGCCCTACTT	Pool 13	473	474	5.13017e-05	122	123	6.54448e-06	12	13	2.11937e-07	46	47	7.60776e-07	NA	NA	NA	NA	NA	NA	NA	NA	NA	NA	NA	NA	NA	NA	NA	1730	1731	9.51588e-05	10222	10223	0.00056664	NA	NA	NA	NA	NA	NA	NA	NA	NA	152	153	4.66595e-06	99	100
IIWSSVSM	ATAATTTGGTCAAGTGTATCTATG	Pool 13	218	219	2.37027e-05	128	129	6.86373e-06	120	121	1.97265e-06	220	221	3.57727e-06	NA	NA	NA	NA	NA	NA	NA	NA	NA	NA	NA	NA	NA	NA	NA	402	403	2.21542e-05	610	611	3.38665e-05	NA	NA	NA	NA	NA	NA	NA	NA	NA	4	5	1.52482e-07	56	57
IIYIKVYM	ATCATATACATAAAAGTGTACATG	Pool 13	146	147	1.591e-05	32	33	1.75584e-06	14	15	2.44543e-07	34	35	5.66535e-07	NA	NA	NA	NA	NA	NA	NA	NA	NA	NA	NA	NA	NA	NA	NA	552	553	3.04002e-05	718	719	3.98527e-05	NA	NA	NA	NA	NA	NA	NA	NA	NA	2	3	9.14892e-08	19	20
IIYMTILL	ATTATCTACATGACCATACTACTT	Pool 13	644	645	6.98093e-05	474	475	2.52734e-05	208	209	3.4073e-06	404	405	6.55562e-06	NA	NA	NA	NA	NA	NA	NA	NA	NA	NA	NA	NA	NA	NA	NA	2388	2389	0.000131331	1634	1635	9.06247e-05	NA	NA	NA	NA	NA	NA	NA	NA	NA	284	285	8.69147e-06	163	164
IIYMTSMV	ATTATATACATGACATCCATGGTT	Pool 13	3689	3690	0.000399374	68	69	3.6713e-06	32	33	5.37995e-07	296	297	4.80746e-06	NA	NA	NA	NA	NA	NA	NA	NA	NA	NA	NA	NA	NA	NA	NA	1936	1937	0.000106483	1146	1147	6.35759e-05	NA	NA	NA	NA	NA	NA	NA	NA	NA	15	16	4.87942e-07	50	51
IIYNFGMV	ATTATTTATAATTTTGGAATGGTA	Pool 13	1358	1359	0.000147087	794	795	4.22997e-05	598	599	9.76543e-06	3532	3533	5.71877e-05	NA	NA	NA	NA	NA	NA	NA	NA	NA	NA	NA	NA	NA	NA	NA	5898	5899	0.000324288	3576	3577	0.000198266	NA	NA	NA	NA	NA	NA	NA	NA	NA	506	507	1.54617e-05	430	431
IIYNILLF	ATTATTTATAATATCCTACTCTTT	Pool 13	1393	1394	0.000150875	3420	3421	0.000182022	640	641	1.04501e-05	1888	1889	3.05767e-05	NA	NA	NA	NA	NA	NA	NA	NA	NA	NA	NA	NA	NA	NA	NA	3002	3003	0.000165085	5900	5901	0.00032708	NA	NA	NA	NA	NA	NA	NA	NA	NA	4921	4922	0.000150103	876	877
IIYNNLGI	ATTATATACAACAACTTAGGGATC	Pool 13	1	2	2.16463e-07	NA	1	5.32072e-08	NA	1	1.63029e-08	NA	1	1.61867e-08	NA	NA	NA	NA	NA	NA	NA	NA	NA	NA	NA	NA	NA	NA	NA	NA	1	5.49733e-08	4	5	2.7714e-07	NA	NA	NA	NA	NA	NA	NA	NA	NA	NA	1	3.04964e-08	NA	1
IIYPLIVL	ATCATTTATCCCCTAATTGTACTT	Pool 13	520	521	5.63886e-05	1392	1393	7.41176e-05	410	411	6.70048e-06	594	595	9.6311e-06	NA	NA	NA	NA	NA	NA	NA	NA	NA	NA	NA	NA	NA	NA	NA	2794	2795	0.00015365	1822	1823	0.000101045	NA	NA	NA	NA	NA	NA	NA	NA	NA	421	422	1.28695e-05	371	372
IIYRDTPV	ATAATCTATAGAGACACGCCGGTG	Pool 13	NA	1	1.08231e-07	NA	1	5.32072e-08	NA	1	1.63029e-08	NA	1	1.61867e-08	NA	NA	NA	NA	NA	NA	NA	NA	NA	NA	NA	NA	NA	NA	NA	10	11	6.04706e-07	NA	1	5.5428e-08	NA	NA	NA	NA	NA	NA	NA	NA	NA	NA	1	3.04964e-08	NA	1
IIYSFSLL	ATAATTTATTCATTTTCCTTACTG	Pool 13	2725	2726	0.000295039	3182	3183	0.000169358	65468	65469	0.00106733	3816	3817	6.17847e-05	NA	NA	NA	NA	NA	NA	NA	NA	NA	NA	NA	NA	NA	NA	NA	8252	8253	0.000453695	7760	7761	0.000430176	NA	NA	NA	NA	NA	NA	NA	NA	NA	22982	22983	0.000700899	1839	1840
IIYTLRNT	ATAATTTATACGCTCCGTAACACT	Pool 13	257	258	2.79237e-05	34	35	1.86225e-06	216	217	3.53773e-06	30	31	5.01789e-07	NA	NA	NA	NA	NA	NA	NA	NA	NA	NA	NA	NA	NA	NA	NA	630	631	3.46882e-05	1198	1199	6.64581e-05	NA	NA	NA	NA	NA	NA	NA	NA	NA	449	450	1.37234e-05	313	314
IKYSYEYL	ATTAAGTATAGTTACGAGTACCTC	Pool 13	101	102	1.10396e-05	34	35	1.86225e-06	64	65	1.05969e-06	548	549	8.88651e-06	NA	NA	NA	NA	NA	NA	NA	NA	NA	NA	NA	NA	NA	NA	NA	222	223	1.2259e-05	600	601	3.33122e-05	NA	NA	NA	NA	NA	NA	NA	NA	NA	17	18	5.48935e-07	44	45
ILAVFYTV	ATTCTAGCGGTATTCTACACTGTC	Pool 13	2981	2982	0.000322746	2318	2319	0.000123387	928	929	1.51454e-05	2158	2159	3.49471e-05	NA	NA	NA	NA	NA	NA	NA	NA	NA	NA	NA	NA	NA	NA	NA	7328	7329	0.000402899	5634	5635	0.000312337	NA	NA	NA	NA	NA	NA	NA	NA	NA	1245	1246	3.79985e-05	557	558
ILCLYIHM	ATTCTATGCCTTTATATCCATATG	Pool 13	769	770	8.33382e-05	332	333	1.7718e-05	78	79	1.28793e-06	250	251	4.06287e-06	NA	NA	NA	NA	NA	NA	NA	NA	NA	NA	NA	NA	NA	NA	NA	1390	1391	7.64679e-05	2644	2645	0.000146607	NA	NA	NA	NA	NA	NA	NA	NA	NA	351	352	1.07347e-05	56	57
ILFAQLGL	ATCCTTTTCGCACAGCTTGGCCTA	Pool 13	6	7	7.5762e-07	8	9	4.78865e-07	NA	1	1.63029e-08	NA	1	1.61867e-08	NA	NA	NA	NA	NA	NA	NA	NA	NA	NA	NA	NA	NA	NA	NA	6	7	3.84813e-07	8	9	4.98852e-07	NA	NA	NA	NA	NA	NA	NA	NA	NA	NA	1	3.04964e-08	NA	1
ILFAVALM	ATACTGTTCGCTGTTGCTCTGATG	Pool 13	3226	3227	0.000349263	3102	3103	0.000165102	3646	3647	5.94566e-05	904	905	1.4649e-05	NA	NA	NA	NA	NA	NA	NA	NA	NA	NA	NA	NA	NA	NA	NA	23826	23827	0.00130985	5096	5097	0.000282516	NA	NA	NA	NA	NA	NA	NA	NA	NA	23413	23414	0.000714043	1972	1973
ILFFFMLL	ATTTTGTTCTTCTTTATGCTACTG	Pool 13	510	511	5.53063e-05	412	413	2.19746e-05	74	75	1.22272e-06	64	65	1.05214e-06	NA	NA	NA	NA	NA	NA	NA	NA	NA	NA	NA	NA	NA	NA	NA	1302	1303	7.16302e-05	1654	1655	9.17333e-05	NA	NA	NA	NA	NA	NA	NA	NA	NA	111	112	3.4156e-06	80	81
ILFKVALM	ATTCTCTTTAAGGTAGCTCTCATG	Pool 13	387	388	4.19938e-05	1326	1327	7.06059e-05	98	99	1.61399e-06	22	23	3.72295e-07	NA	NA	NA	NA	NA	NA	NA	NA	NA	NA	NA	NA	NA	NA	NA	1016	1017	5.59078e-05	1496	1497	8.29756e-05	NA	NA	NA	NA	NA	NA	NA	NA	NA	171	172	5.24538e-06	210	211
ILFLASPL	ATATTGTTCCTCGCCTCACCACTC	Pool 13	233	234	2.53262e-05	232	233	1.23973e-05	800	801	1.30586e-05	292	293	4.74271e-06	NA	NA	NA	NA	NA	NA	NA	NA	NA	NA	NA	NA	NA	NA	NA	692	693	3.80965e-05	498	499	2.76585e-05	NA	NA	NA	NA	NA	NA	NA	NA	NA	369	370	1.12837e-05	341	342
ILFSTPTI	ATCCTCTTTAGTACTCCGACGATC	Pool 13	2318	2319	0.000250989	376	377	2.00591e-05	146	147	2.39652e-06	1982	1983	3.20983e-05	NA	NA	NA	NA	NA	NA	NA	NA	NA	NA	NA	NA	NA	NA	NA	2962	2963	0.000162886	5500	5501	0.000304909	NA	NA	NA	NA	NA	NA	NA	NA	NA	125	126	3.84255e-06	813	814
ILFVAAGL	ATCTTATTTGTGGCTGCGGGCTTA	Pool 13	800	801	8.66934e-05	216	217	1.1546e-05	190	191	3.11385e-06	112	113	1.8291e-06	NA	NA	NA	NA	NA	NA	NA	NA	NA	NA	NA	NA	NA	NA	NA	2090	2091	0.000114949	2586	2587	0.000143392	NA	NA	NA	NA	NA	NA	NA	NA	NA	707	708	2.15914e-05	288	289
ILFYHLAA	ATTCTATTCTATCACCTAGCTGCA	Pool 13	196	197	2.13216e-05	174	175	9.31126e-06	6	7	1.1412e-07	14	15	2.42801e-07	NA	NA	NA	NA	NA	NA	NA	NA	NA	NA	NA	NA	NA	NA	NA	532	533	2.93008e-05	1828	1829	0.000101378	NA	NA	NA	NA	NA	NA	NA	NA	NA	23	24	7.31913e-07	17	18
ILHEYDLL	ATCCTGCATGAATATGACTTACTT	Pool 13	898	899	9.73001e-05	1614	1615	8.59296e-05	3142	3143	5.124e-05	550	551	8.91889e-06	NA	NA	NA	NA	NA	NA	NA	NA	NA	NA	NA	NA	NA	NA	NA	2960	2961	0.000162776	4662	4663	0.000258461	NA	NA	NA	NA	NA	NA	NA	NA	NA	2082	2083	6.3524e-05	2416	2417
ILHVKSNL	ATACTCCATGTGAAATCCAATTTA	Pool 13	88	89	9.6326e-06	2	3	1.59622e-07	NA	1	1.63029e-08	2	3	4.85602e-08	NA	NA	NA	NA	NA	NA	NA	NA	NA	NA	NA	NA	NA	NA	NA	258	259	1.42381e-05	596	597	3.30905e-05	NA	NA	NA	NA	NA	NA	NA	NA	NA	5	6	1.82978e-07	26	27
ILKFAQYL	ATTCTAAAGTTTGCTCAGTATCTT	Pool 13	1627	1628	0.000176201	924	925	4.92167e-05	230	231	3.76597e-06	1756	1757	2.84401e-05	NA	NA	NA	NA	NA	NA	NA	NA	NA	NA	NA	NA	NA	NA	NA	2900	2901	0.000159478	4548	4549	0.000252142	NA	NA	NA	NA	NA	NA	NA	NA	NA	311	312	9.51487e-06	711	712
ILLAAFGL	ATTCTGCTCGCCGCATTTGGTCTA	Pool 13	1227	1228	0.000132908	422	423	2.25066e-05	284	285	4.64632e-06	680	681	1.10232e-05	NA	NA	NA	NA	NA	NA	NA	NA	NA	NA	NA	NA	NA	NA	NA	2414	2415	0.000132761	1824	1825	0.000101156	NA	NA	NA	NA	NA	NA	NA	NA	NA	3175	3176	9.68565e-05	1026	1027
ILLFLSFL	ATCTTACTTTTCCTGTCCTTTCTT	Pool 13	11671	11672	0.00126328	8348	8349	0.000444227	5316	5317	8.66824e-05	3664	3665	5.93244e-05	NA	NA	NA	NA	NA	NA	NA	NA	NA	NA	NA	NA	NA	NA	NA	56226	56227	0.00309098	23018	23019	0.0012759	NA	NA	NA	NA	NA	NA	NA	NA	NA	17614	17615	0.000537194	8834	8835
ILLHIPRL	ATTTTGCTGCACATCCCACGGCTC	Pool 13	462	463	5.01112e-05	350	351	1.86757e-05	240	241	3.92899e-06	144	145	2.34708e-06	NA	NA	NA	NA	NA	NA	NA	NA	NA	NA	NA	NA	NA	NA	NA	880	881	4.84315e-05	1962	1963	0.000108805	NA	NA	NA	NA	NA	NA	NA	NA	NA	433	434	1.32354e-05	119	120
ILLLVHNL	ATTCTTCTCTTGGTCCACAACCTT	Pool 13	750	751	8.12818e-05	474	475	2.52734e-05	1066	1067	1.73952e-05	1242	1243	2.01201e-05	NA	NA	NA	NA	NA	NA	NA	NA	NA	NA	NA	NA	NA	NA	NA	1358	1359	7.47087e-05	1922	1923	0.000106588	NA	NA	NA	NA	NA	NA	NA	NA	NA	148	149	4.54396e-06	125	126
ILLNYAVL	ATTCTTCTTAATTACGCCGTTCTG	Pool 13	878	879	9.51355e-05	662	663	3.52764e-05	292	293	4.77674e-06	74	75	1.214e-06	NA	NA	NA	NA	NA	NA	NA	NA	NA	NA	NA	NA	NA	NA	NA	1162	1163	6.3934e-05	1640	1641	9.09573e-05	NA	NA	NA	NA	NA	NA	NA	NA	NA	274	275	8.38651e-06	122	123
ILLQFPFL	ATACTCCTCCAGTTTCCTTTCCTG	Pool 13	3909	3910	0.000423185	1786	1787	9.50813e-05	1108	1109	1.80799e-05	1736	1737	2.81163e-05	NA	NA	NA	NA	NA	NA	NA	NA	NA	NA	NA	NA	NA	NA	NA	9506	9507	0.000522631	17388	17389	0.000963837	NA	NA	NA	NA	NA	NA	NA	NA	NA	263	264	8.05105e-06	1834	1835
ILLSIPQL	ATTCTCCTCTCTATCCCGCAGCTT	Pool 13	627	628	6.79694e-05	224	225	1.19716e-05	30	31	5.05389e-07	16	17	2.75174e-07	NA	NA	NA	NA	NA	NA	NA	NA	NA	NA	NA	NA	NA	NA	NA	1810	1811	9.95567e-05	1944	1945	0.000107807	NA	NA	NA	NA	NA	NA	NA	NA	NA	8	9	2.74468e-07	1486	1487
ILLSVLNL	ATCTTACTTTCCGTCCTCAACCTC	Pool 13	843	844	9.13474e-05	424	425	2.26131e-05	1734	1735	2.82855e-05	280	281	4.54847e-06	NA	NA	NA	NA	NA	NA	NA	NA	NA	NA	NA	NA	NA	NA	NA	2168	2169	0.000119237	1162	1163	6.44627e-05	NA	NA	NA	NA	NA	NA	NA	NA	NA	1433	1434	4.37318e-05	897	898
ILMCFVRI	ATCCTCATGTGTTTTGTTAGGATA	Pool 13	4716	4717	0.000510528	23052	23053	0.00122659	3250	3251	5.30007e-05	4532	4533	7.33744e-05	NA	NA	NA	NA	NA	NA	NA	NA	NA	NA	NA	NA	NA	NA	NA	9646	9647	0.000530327	8670	8671	0.000480616	NA	NA	NA	NA	NA	NA	NA	NA	NA	9515	9516	0.000290204	4687	4688
ILMIKPRL	ATCCTCATGATCAAACCTAGGCTT	Pool 13	978	979	0.000105959	3670	3671	0.000195324	130	131	2.13568e-06	116	117	1.89385e-06	NA	NA	NA	NA	NA	NA	NA	NA	NA	NA	NA	NA	NA	NA	NA	1268	1269	6.97611e-05	2200	2201	0.000121997	NA	NA	NA	NA	NA	NA	NA	NA	NA	261	262	7.99005e-06	15	16
ILMLTSSL	ATACTCATGCTCACGTCGAGTTTG	Pool 13	60	61	6.60212e-06	44	45	2.39432e-06	10	11	1.79332e-07	2	3	4.85602e-08	NA	NA	NA	NA	NA	NA	NA	NA	NA	NA	NA	NA	NA	NA	NA	118	119	6.54182e-06	132	133	7.37192e-06	NA	NA	NA	NA	NA	NA	NA	NA	NA	2	3	9.14892e-08	4	5
ILMTHSML	ATTCTGATGACGCATAGCATGTTA	Pool 13	128	129	1.39619e-05	52	53	2.81998e-06	122	123	2.00525e-06	18	19	3.07548e-07	NA	NA	NA	NA	NA	NA	NA	NA	NA	NA	NA	NA	NA	NA	NA	652	653	3.58976e-05	382	383	2.12289e-05	NA	NA	NA	NA	NA	NA	NA	NA	NA	NA	1	3.04964e-08	193	194
ILMTLKML	ATACTTATGACACTTAAAATGCTA	Pool 13	1009	1010	0.000109314	770	771	4.10227e-05	408	409	6.66788e-06	352	353	5.71391e-06	NA	NA	NA	NA	NA	NA	NA	NA	NA	NA	NA	NA	NA	NA	NA	2480	2481	0.000136389	3472	3473	0.000192501	NA	NA	NA	NA	NA	NA	NA	NA	NA	429	430	1.31134e-05	303	304
ILNFQRAL	ATATTGAATTTCCAAAGAGCGTTG	Pool 13	NA	1	1.08231e-07	NA	1	5.32072e-08	NA	1	1.63029e-08	4	5	8.09336e-08	NA	NA	NA	NA	NA	NA	NA	NA	NA	NA	NA	NA	NA	NA	NA	34	35	1.92407e-06	NA	1	5.5428e-08	NA	NA	NA	NA	NA	NA	NA	NA	NA	NA	1	3.04964e-08	NA	1
ILPILGSL	ATCTTGCCCATTCTCGGATCTCTC	Pool 13	5977	5978	0.000647008	6326	6327	0.000336642	16084	16085	0.000262232	189792	189793	0.00307213	NA	NA	NA	NA	NA	NA	NA	NA	NA	NA	NA	NA	NA	NA	NA	11094	11095	0.000609929	14964	14965	0.000829479	NA	NA	NA	NA	NA	NA	NA	NA	NA	4021	4022	0.000122656	13219	13220
ILPPFELL	ATTCTACCGCCATTTGAGTTACTA	Pool 13	298	299	3.23612e-05	256	257	1.36742e-05	126	127	2.07047e-06	46	47	7.60776e-07	NA	NA	NA	NA	NA	NA	NA	NA	NA	NA	NA	NA	NA	NA	NA	2370	2371	0.000130342	490	491	2.72151e-05	NA	NA	NA	NA	NA	NA	NA	NA	NA	30	31	9.45388e-07	11	12
ILQMFGKM	ATACTACAGATGTTTGGCAAGATG	Pool 13	1227	1228	0.000132908	686	687	3.65533e-05	20	21	3.42361e-07	1024	1025	1.65914e-05	NA	NA	NA	NA	NA	NA	NA	NA	NA	NA	NA	NA	NA	NA	NA	3876	3877	0.000213131	5294	5295	0.000293491	NA	NA	NA	NA	NA	NA	NA	NA	NA	60	61	1.86028e-06	336	337
ILQTFLYL	ATACTCCAAACCTTCCTGTACCTC	Pool 13	107	108	1.1689e-05	NA	1	5.32072e-08	8	9	1.46726e-07	NA	1	1.61867e-08	NA	NA	NA	NA	NA	NA	NA	NA	NA	NA	NA	NA	NA	NA	NA	116	117	6.43188e-06	334	335	1.85684e-05	NA	NA	NA	NA	NA	NA	NA	NA	NA	48	49	1.49432e-06	3	4
ILREFVSI	ATTCTTAGGGAGTTCGTAAGTATC	Pool 13	8387	8388	0.000907846	4154	4155	0.000221076	2790	2791	4.55013e-05	3228	3229	5.22669e-05	NA	NA	NA	NA	NA	NA	NA	NA	NA	NA	NA	NA	NA	NA	NA	13260	13261	0.000729001	11814	11815	0.000654881	NA	NA	NA	NA	NA	NA	NA	NA	NA	2095	2096	6.39204e-05	4303	4304
ILRHFHLL	ATTCTTAGACATTTTCACCTACTC	Pool 13	1238	1239	0.000134099	214	215	1.14395e-05	110	111	1.80962e-06	594	595	9.6311e-06	NA	NA	NA	NA	NA	NA	NA	NA	NA	NA	NA	NA	NA	NA	NA	2464	2465	0.000135509	2108	2109	0.000116898	NA	NA	NA	NA	NA	NA	NA	NA	NA	233	234	7.13616e-06	39	40
ILRRFLVL	ATCTTACGCCGCTTTCTCGTGTTA	Pool 13	147	148	1.60183e-05	24	25	1.33018e-06	106	107	1.74441e-06	NA	1	1.61867e-08	NA	NA	NA	NA	NA	NA	NA	NA	NA	NA	NA	NA	NA	NA	NA	536	537	2.95207e-05	596	597	3.30905e-05	NA	NA	NA	NA	NA	NA	NA	NA	NA	35	36	1.09787e-06	26	27
ILRYFGKL	ATTCTCAGGTATTTTGGTAAGCTG	Pool 13	3647	3648	0.000394828	4040	4041	0.00021501	1912	1913	3.11874e-05	2894	2895	4.68606e-05	NA	NA	NA	NA	NA	NA	NA	NA	NA	NA	NA	NA	NA	NA	NA	9034	9035	0.000496684	9646	9647	0.000534713	NA	NA	NA	NA	NA	NA	NA	NA	NA	2164	2165	6.60247e-05	2418	2419
ILSCFCPM	ATACTCAGTTGCTTCTGTCCCATG	Pool 13	127	128	1.38536e-05	112	113	6.01241e-06	12	13	2.11937e-07	40	41	6.63656e-07	NA	NA	NA	NA	NA	NA	NA	NA	NA	NA	NA	NA	NA	NA	NA	502	503	2.76516e-05	558	559	3.09842e-05	NA	NA	NA	NA	NA	NA	NA	NA	NA	26	27	8.23403e-07	51	52
ILSIFYTI	ATACTCTCGATTTTCTACACGATT	Pool 13	4369	4370	0.000472972	714	715	3.80431e-05	72	73	1.19011e-06	234	235	3.80388e-06	NA	NA	NA	NA	NA	NA	NA	NA	NA	NA	NA	NA	NA	NA	NA	2782	2783	0.000152991	1826	1827	0.000101267	NA	NA	NA	NA	NA	NA	NA	NA	NA	604	605	1.84503e-05	161	162
ILTVFYTI	ATCTTGACTGTATTTTACACCATT	Pool 13	1699	1700	0.000183993	896	897	4.77269e-05	248	249	4.05942e-06	1970	1971	3.1904e-05	NA	NA	NA	NA	NA	NA	NA	NA	NA	NA	NA	NA	NA	NA	NA	4730	4731	0.000260079	4552	4553	0.000252363	NA	NA	NA	NA	NA	NA	NA	NA	NA	1160	1161	3.54063e-05	470	471
ILVLFSSL	ATATTAGTTCTGTTTTCGTCTCTT	Pool 13	2485	2486	0.000269063	636	637	3.3893e-05	24	25	4.07572e-07	334	335	5.42255e-06	NA	NA	NA	NA	NA	NA	NA	NA	NA	NA	NA	NA	NA	NA	NA	3866	3867	0.000212582	4810	4811	0.000266664	NA	NA	NA	NA	NA	NA	NA	NA	NA	235	236	7.19715e-06	171	172
ILVLTYPL	ATACTTGTTTTGACATACCCGCTC	Pool 13	321	322	3.48505e-05	208	209	1.11203e-05	44	45	7.3363e-07	454	455	7.36496e-06	NA	NA	NA	NA	NA	NA	NA	NA	NA	NA	NA	NA	NA	NA	NA	996	997	5.48084e-05	852	853	4.728e-05	NA	NA	NA	NA	NA	NA	NA	NA	NA	43	44	1.34184e-06	357	358
ILVSFGLF	ATCCTCGTATCCTTCGGGTTATTT	Pool 13	12435	12436	0.00134597	33708	33709	0.00179356	8130	8131	0.000132559	35670	35671	0.000577397	NA	NA	NA	NA	NA	NA	NA	NA	NA	NA	NA	NA	NA	NA	NA	38392	38393	0.00211059	33074	33075	0.00183328	NA	NA	NA	NA	NA	NA	NA	NA	NA	6204	6205	0.00018923	16974	16975
ILVSIFAL	ATTCTCGTGTCTATATTTGCGCTG	Pool 13	809	810	8.76675e-05	888	889	4.73012e-05	494	495	8.06993e-06	526	527	8.53041e-06	NA	NA	NA	NA	NA	NA	NA	NA	NA	NA	NA	NA	NA	NA	NA	1906	1907	0.000104834	2718	2719	0.000150709	NA	NA	NA	NA	NA	NA	NA	NA	NA	486	487	1.48517e-05	647	648
ILVSYIRV	ATTCTGGTATCGTACATTCGAGTT	Pool 13	621	622	6.732e-05	234	235	1.25037e-05	158	159	2.59216e-06	230	231	3.73913e-06	NA	NA	NA	NA	NA	NA	NA	NA	NA	NA	NA	NA	NA	NA	NA	2506	2507	0.000137818	1522	1523	8.44168e-05	NA	NA	NA	NA	NA	NA	NA	NA	NA	367	368	1.12227e-05	92	93
ILYAAPQL	ATACTATATGCGGCACCCCAATTG	Pool 13	202	203	2.1971e-05	34	35	1.86225e-06	22	23	3.74966e-07	62	63	1.01976e-06	NA	NA	NA	NA	NA	NA	NA	NA	NA	NA	NA	NA	NA	NA	NA	402	403	2.21542e-05	162	163	9.03476e-06	NA	NA	NA	NA	NA	NA	NA	NA	NA	10	11	3.3546e-07	18	19
ILYAYQLS	ATCTTATATGCCTATCAGCTCAGC	Pool 13	681	682	7.38139e-05	240	241	1.28229e-05	90	91	1.48356e-06	144	145	2.34708e-06	NA	NA	NA	NA	NA	NA	NA	NA	NA	NA	NA	NA	NA	NA	NA	4072	4073	0.000223906	2872	2873	0.000159245	NA	NA	NA	NA	NA	NA	NA	NA	NA	55	56	1.7078e-06	22	23
ILYDHTAL	ATTCTTTACGATCATACTGCATTA	Pool 13	844	845	9.14556e-05	824	825	4.38959e-05	92	93	1.51617e-06	402	403	6.52325e-06	NA	NA	NA	NA	NA	NA	NA	NA	NA	NA	NA	NA	NA	NA	NA	1958	1959	0.000107693	1006	1007	5.58159e-05	NA	NA	NA	NA	NA	NA	NA	NA	NA	37	38	1.15886e-06	132	133
ILYDIHYI	ATACTATATGACATCCACTATATC	Pool 13	826	827	8.95074e-05	228	229	1.21844e-05	136	137	2.23349e-06	76	77	1.24638e-06	NA	NA	NA	NA	NA	NA	NA	NA	NA	NA	NA	NA	NA	NA	NA	2398	2399	0.000131881	2258	2259	0.000125212	NA	NA	NA	NA	NA	NA	NA	NA	NA	89	90	2.74468e-06	50	51
ILYDREGL	ATTTTGTATGATCGAGAGGGATTA	Pool 13	260	261	2.82484e-05	128	129	6.86373e-06	16	17	2.77149e-07	6	7	1.13307e-07	NA	NA	NA	NA	NA	NA	NA	NA	NA	NA	NA	NA	NA	NA	NA	1074	1075	5.90963e-05	1038	1039	5.75896e-05	NA	NA	NA	NA	NA	NA	NA	NA	NA	6	7	2.13475e-07	178	179
ILYFFFLL	ATTCTGTACTTCTTCTTTCTTCTG	Pool 13	4478	4479	0.000484769	4110	4111	0.000218735	814	815	1.32868e-05	48694	48695	0.000788213	NA	NA	NA	NA	NA	NA	NA	NA	NA	NA	NA	NA	NA	NA	NA	18614	18615	0.00102333	13988	13989	0.000775382	NA	NA	NA	NA	NA	NA	NA	NA	NA	1338	1339	4.08347e-05	1912	1913
ILYFMLGL	ATCCTATACTTCATGCTTGGCCTA	Pool 13	4	5	5.41157e-07	NA	1	5.32072e-08	4	5	8.15144e-08	NA	1	1.61867e-08	NA	NA	NA	NA	NA	NA	NA	NA	NA	NA	NA	NA	NA	NA	NA	108	109	5.99209e-06	NA	1	5.5428e-08	NA	NA	NA	NA	NA	NA	NA	NA	NA	NA	1	3.04964e-08	NA	1
ILYGMLLL	ATCTTATACGGGATGCTGTTGCTA	Pool 13	183	184	1.99146e-05	18	19	1.01094e-06	84	85	1.38574e-06	8	9	1.45681e-07	NA	NA	NA	NA	NA	NA	NA	NA	NA	NA	NA	NA	NA	NA	NA	1024	1025	5.63476e-05	226	227	1.25821e-05	NA	NA	NA	NA	NA	NA	NA	NA	NA	10	11	3.3546e-07	3	4
ILYIVSYF	ATCCTGTACATCGTGTCCTACTTC	Pool 13	3730	3731	0.000403812	724	725	3.85752e-05	164	165	2.68998e-06	3170	3171	5.13281e-05	NA	NA	NA	NA	NA	NA	NA	NA	NA	NA	NA	NA	NA	NA	NA	5330	5331	0.000293063	4542	4543	0.000251809	NA	NA	NA	NA	NA	NA	NA	NA	NA	578	579	1.76574e-05	154	155
ILYLMAVV	ATACTGTATCTGATGGCAGTGGTC	Pool 13	173	174	1.88323e-05	258	259	1.37807e-05	108	109	1.77701e-06	NA	1	1.61867e-08	NA	NA	NA	NA	NA	NA	NA	NA	NA	NA	NA	NA	NA	NA	NA	2110	2111	0.000116049	358	359	1.98986e-05	NA	NA	NA	NA	NA	NA	NA	NA	NA	1191	1192	3.63517e-05	440	441
ILYNNLGL	ATACTGTATAACAACTTGGGGCTC	Pool 13	769	770	8.33382e-05	2598	2599	0.000138285	15088	15089	0.000245994	4668	4669	7.55758e-05	NA	NA	NA	NA	NA	NA	NA	NA	NA	NA	NA	NA	NA	NA	NA	2008	2009	0.000110441	1928	1929	0.000106921	NA	NA	NA	NA	NA	NA	NA	NA	NA	2570	2571	7.84062e-05	1658	1659
ILYPTLPV	ATTCTGTACCCTACACTGCCCGTC	Pool 13	641	642	6.94846e-05	348	349	1.85693e-05	16	17	2.77149e-07	NA	1	1.61867e-08	NA	NA	NA	NA	NA	NA	NA	NA	NA	NA	NA	NA	NA	NA	NA	798	799	4.39237e-05	1428	1429	7.92065e-05	NA	NA	NA	NA	NA	NA	NA	NA	NA	6	7	2.13475e-07	38	39
ILYPYELF	ATCTTATACCCGTATGAGCTGTTT	Pool 13	584	585	6.33154e-05	1916	1917	0.000101998	472	473	7.71126e-06	1146	1147	1.85662e-05	NA	NA	NA	NA	NA	NA	NA	NA	NA	NA	NA	NA	NA	NA	NA	3346	3347	0.000183996	1324	1325	7.3442e-05	NA	NA	NA	NA	NA	NA	NA	NA	NA	73	74	2.25673e-06	668	669
ILYSHYTT	ATACTGTATTCCCATTACACCACG	Pool 13	189	190	2.0564e-05	52	53	2.81998e-06	6	7	1.1412e-07	2	3	4.85602e-08	NA	NA	NA	NA	NA	NA	NA	NA	NA	NA	NA	NA	NA	NA	NA	890	891	4.89812e-05	332	333	1.84575e-05	NA	NA	NA	NA	NA	NA	NA	NA	NA	1	2	6.09928e-08	61	62
ILYTVLSI	ATCTTGTACACAGTCCTTTCAATA	Pool 13	1082	1083	0.000117215	326	327	1.73988e-05	330	331	5.39625e-06	368	369	5.9729e-06	NA	NA	NA	NA	NA	NA	NA	NA	NA	NA	NA	NA	NA	NA	NA	1818	1819	9.99964e-05	1622	1623	8.99596e-05	NA	NA	NA	NA	NA	NA	NA	NA	NA	2983	2984	9.10012e-05	303	304
ILYTYQLL	ATATTATATACCTATCAACTACTA	Pool 13	31	32	3.46341e-06	14	15	7.98108e-07	18	19	3.09755e-07	570	571	9.24262e-06	NA	NA	NA	NA	NA	NA	NA	NA	NA	NA	NA	NA	NA	NA	NA	38	39	2.14396e-06	92	93	5.1548e-06	NA	NA	NA	NA	NA	NA	NA	NA	NA	55	56	1.7078e-06	55	56
IMFLFVLA	ATCATGTTTCTGTTTGTTCTTGCT	Pool 13	2181	2182	0.000236161	4382	4383	0.000233207	2548	2549	4.1556e-05	18294	18295	0.000296136	NA	NA	NA	NA	NA	NA	NA	NA	NA	NA	NA	NA	NA	NA	NA	4554	4555	0.000250403	4824	4825	0.00026744	NA	NA	NA	NA	NA	NA	NA	NA	NA	1280	1281	3.90659e-05	3744	3745
IMFRYAVD	ATTATGTTCCGTTACGCGGTCGAT	Pool 13	232	233	2.52179e-05	684	685	3.64469e-05	152	153	2.49434e-06	8	9	1.45681e-07	NA	NA	NA	NA	NA	NA	NA	NA	NA	NA	NA	NA	NA	NA	NA	492	493	2.71018e-05	706	707	3.91876e-05	NA	NA	NA	NA	NA	NA	NA	NA	NA	5	6	1.82978e-07	8	9
IMFSFRVP	ATAATGTTCAGTTTCAGAGTTCCA	Pool 13	1191	1192	0.000129012	544	545	2.89979e-05	218	219	3.57033e-06	136	137	2.21758e-06	NA	NA	NA	NA	NA	NA	NA	NA	NA	NA	NA	NA	NA	NA	NA	4390	4391	0.000241388	4958	4959	0.000274867	NA	NA	NA	NA	NA	NA	NA	NA	NA	424	425	1.2961e-05	359	360
IMFSIIFL	ATAATGTTCTCGATCATCTTCTTA	Pool 13	7364	7365	0.000797125	794	795	4.22997e-05	106	107	1.74441e-06	2568	2569	4.15837e-05	NA	NA	NA	NA	NA	NA	NA	NA	NA	NA	NA	NA	NA	NA	NA	4604	4605	0.000253152	6918	6919	0.000383506	NA	NA	NA	NA	NA	NA	NA	NA	NA	97	98	2.98865e-06	2404	2405
IMFSLNTV	ATAATGTTCAGTCTTAATACAGTT	Pool 13	500	501	5.4224e-05	474	475	2.52734e-05	84	85	1.38574e-06	220	221	3.57727e-06	NA	NA	NA	NA	NA	NA	NA	NA	NA	NA	NA	NA	NA	NA	NA	2688	2689	0.000147823	1636	1637	9.07356e-05	NA	NA	NA	NA	NA	NA	NA	NA	NA	728	729	2.22319e-05	340	341
IMFVDPSL	ATTATGTTTGTGGACCCGTCCCTT	Pool 13	734	735	7.95501e-05	672	673	3.58084e-05	438	439	7.15696e-06	268	269	4.35423e-06	NA	NA	NA	NA	NA	NA	NA	NA	NA	NA	NA	NA	NA	NA	NA	1828	1829	0.000100546	2042	2043	0.000113239	NA	NA	NA	NA	NA	NA	NA	NA	NA	294	295	8.99644e-06	174	175
IMHIYATV	ATAATGCATATCTACGCCACGGTG	Pool 13	62	63	6.81858e-06	52	53	2.81998e-06	NA	1	1.63029e-08	4	5	8.09336e-08	NA	NA	NA	NA	NA	NA	NA	NA	NA	NA	NA	NA	NA	NA	NA	270	271	1.48978e-05	608	609	3.37556e-05	NA	NA	NA	NA	NA	NA	NA	NA	NA	8	9	2.74468e-07	15	16
IMHLVPVL	ATAATGCACCTCGTACCAGTGCTA	Pool 13	214	215	2.32698e-05	66	67	3.56488e-06	2	3	4.89086e-08	NA	1	1.61867e-08	NA	NA	NA	NA	NA	NA	NA	NA	NA	NA	NA	NA	NA	NA	NA	408	409	2.24841e-05	354	355	1.96769e-05	NA	NA	NA	NA	NA	NA	NA	NA	NA	9	10	3.04964e-07	NA	1
IMIRSIFL	ATTATGATTCGCTCTATCTTTCTT	Pool 13	3898	3899	0.000421994	1570	1571	8.35885e-05	708	709	1.15587e-05	5098	5099	8.25361e-05	NA	NA	NA	NA	NA	NA	NA	NA	NA	NA	NA	NA	NA	NA	NA	6278	6279	0.000345177	8312	8313	0.000460773	NA	NA	NA	NA	NA	NA	NA	NA	NA	1184	1185	3.61382e-05	1131	1132
IMITNFEL	ATAATGATTACCAATTTCGAGCTG	Pool 13	308	309	3.34435e-05	626	627	3.33609e-05	32	33	5.37995e-07	8	9	1.45681e-07	NA	NA	NA	NA	NA	NA	NA	NA	NA	NA	NA	NA	NA	NA	NA	2634	2635	0.000144855	570	571	3.16494e-05	NA	NA	NA	NA	NA	NA	NA	NA	NA	10	11	3.3546e-07	57	58
IMLDYLDL	ATTATGCTGGATTACTTAGATCTG	Pool 13	553	554	5.99602e-05	304	305	1.62282e-05	7580	7581	0.000123592	2532	2533	4.1001e-05	NA	NA	NA	NA	NA	NA	NA	NA	NA	NA	NA	NA	NA	NA	NA	1944	1945	0.000106923	9226	9227	0.000511434	NA	NA	NA	NA	NA	NA	NA	NA	NA	4	5	1.52482e-07	1881	1882
IMLFCLGL	ATAATGTTGTTCTGCTTAGGTCTC	Pool 13	228	229	2.4785e-05	94	95	5.05468e-06	28	29	4.72784e-07	222	223	3.60964e-06	NA	NA	NA	NA	NA	NA	NA	NA	NA	NA	NA	NA	NA	NA	NA	832	833	4.57928e-05	566	567	3.14277e-05	NA	NA	NA	NA	NA	NA	NA	NA	NA	15	16	4.87942e-07	14	15
IMLLERTL	ATTATGCTTCTGGAACGTACACTA	Pool 13	848	849	9.18885e-05	1110	1111	5.91132e-05	504	505	8.23296e-06	472	473	7.65632e-06	NA	NA	NA	NA	NA	NA	NA	NA	NA	NA	NA	NA	NA	NA	NA	2338	2339	0.000128583	1486	1487	8.24214e-05	NA	NA	NA	NA	NA	NA	NA	NA	NA	271	272	8.29502e-06	321	322
IMLSSASI	ATAATGCTGTCATCAGCTAGTATC	Pool 13	2704	2705	0.000292766	358	359	1.91014e-05	98	99	1.61399e-06	4120	4121	6.67055e-05	NA	NA	NA	NA	NA	NA	NA	NA	NA	NA	NA	NA	NA	NA	NA	5694	5695	0.000313073	6092	6093	0.000337723	NA	NA	NA	NA	NA	NA	NA	NA	NA	1315	1316	4.01333e-05	419	420
IMLVLPSI	ATCATGTTGGTGCTTCCGAGCATA	Pool 13	2331	2332	0.000252396	1750	1751	9.31658e-05	190	191	3.11385e-06	220	221	3.57727e-06	NA	NA	NA	NA	NA	NA	NA	NA	NA	NA	NA	NA	NA	NA	NA	2080	2081	0.000114399	2376	2377	0.000131752	NA	NA	NA	NA	NA	NA	NA	NA	NA	284	285	8.69147e-06	101	102
IMMVVAGF	ATTATGATGGTCGTCGCAGGGTTT	Pool 13	1289	1290	0.000139619	922	923	4.91102e-05	332	333	5.42886e-06	2740	2741	4.43678e-05	NA	NA	NA	NA	NA	NA	NA	NA	NA	NA	NA	NA	NA	NA	NA	4506	4507	0.000247765	5390	5391	0.000298812	NA	NA	NA	NA	NA	NA	NA	NA	NA	1100	1101	3.35765e-05	619	620
IMNQYTEI	ATTATGAACCAATATACGGAGATC	Pool 13	6	7	7.5762e-07	NA	1	5.32072e-08	4	5	8.15144e-08	2	3	4.85602e-08	NA	NA	NA	NA	NA	NA	NA	NA	NA	NA	NA	NA	NA	NA	NA	68	69	3.79316e-06	108	109	6.04165e-06	NA	NA	NA	NA	NA	NA	NA	NA	NA	NA	1	3.04964e-08	3	4
IMRWLWQL	ATCATGCGGTGGTTGTGGCAGCTA	Pool 13	NA	1	1.08231e-07	4	5	2.66036e-07	NA	1	1.63029e-08	4	5	8.09336e-08	NA	NA	NA	NA	NA	NA	NA	NA	NA	NA	NA	NA	NA	NA	NA	NA	1	5.49733e-08	NA	1	5.5428e-08	NA	NA	NA	NA	NA	NA	NA	NA	NA	NA	1	3.04964e-08	NA	1
IMTFRPSM	ATTATGACATTTCGTCCGTCTATG	Pool 13	5845	5846	0.000632721	7364	7365	0.000391871	864	865	1.4102e-05	2616	2617	4.23607e-05	NA	NA	NA	NA	NA	NA	NA	NA	NA	NA	NA	NA	NA	NA	NA	9462	9463	0.000520212	6026	6027	0.000334064	NA	NA	NA	NA	NA	NA	NA	NA	NA	9619	9620	0.000293375	25061	25062
IMYNLIIV	ATCATGTATAATCTTATTATAGTG	Pool 13	185	186	2.01311e-05	56	57	3.03281e-06	10	11	1.79332e-07	78	79	1.27875e-06	NA	NA	NA	NA	NA	NA	NA	NA	NA	NA	NA	NA	NA	NA	NA	1098	1099	6.04157e-05	674	675	3.74139e-05	NA	NA	NA	NA	NA	NA	NA	NA	NA	8	9	2.74468e-07	447	448
IMYYLSRI	ATCATGTATTACCTATCCCGGATA	Pool 13	1894	1895	0.000205099	308	309	1.6441e-05	54	55	8.96658e-07	482	483	7.81819e-06	NA	NA	NA	NA	NA	NA	NA	NA	NA	NA	NA	NA	NA	NA	NA	4152	4153	0.000228304	2724	2725	0.000151041	NA	NA	NA	NA	NA	NA	NA	NA	NA	116	117	3.56808e-06	697	698
INALVHSL	ATCAACGCCTTAGTTCATAGTCTC	Pool 13	2127	2128	0.000230317	1198	1199	6.37954e-05	630	631	1.02871e-05	10234	10235	0.000165671	NA	NA	NA	NA	NA	NA	NA	NA	NA	NA	NA	NA	NA	NA	NA	4976	4977	0.000273602	3826	3827	0.000212123	NA	NA	NA	NA	NA	NA	NA	NA	NA	895	896	2.73248e-05	2877	2878
INANYIDI	ATAAATGCCAATTATATCGACATT	Pool 13	429	430	4.65395e-05	228	229	1.21844e-05	272	273	4.45069e-06	14	15	2.42801e-07	NA	NA	NA	NA	NA	NA	NA	NA	NA	NA	NA	NA	NA	NA	NA	1422	1423	7.8227e-05	1078	1079	5.98068e-05	NA	NA	NA	NA	NA	NA	NA	NA	NA	409	410	1.25035e-05	288	289
INEAYAAL	ATCAATGAGGCGTACGCAGCCCTG	Pool 13	NA	1	1.08231e-07	NA	1	5.32072e-08	NA	1	1.63029e-08	6	7	1.13307e-07	NA	NA	NA	NA	NA	NA	NA	NA	NA	NA	NA	NA	NA	NA	NA	46	47	2.58375e-06	NA	1	5.5428e-08	NA	NA	NA	NA	NA	NA	NA	NA	NA	NA	1	3.04964e-08	NA	1
INFDDAFL	ATTAACTTCGACGACGCGTTCCTG	Pool 13	27	28	3.03048e-06	NA	1	5.32072e-08	12	13	2.11937e-07	NA	1	1.61867e-08	NA	NA	NA	NA	NA	NA	NA	NA	NA	NA	NA	NA	NA	NA	NA	128	129	7.09156e-06	140	141	7.81534e-06	NA	NA	NA	NA	NA	NA	NA	NA	NA	6	7	2.13475e-07	3	4
INFNCRKL	ATCAACTTTAACTGCCGGAAGCTC	Pool 13	576	577	6.24496e-05	46	47	2.50074e-06	80	81	1.32053e-06	24	25	4.04668e-07	NA	NA	NA	NA	NA	NA	NA	NA	NA	NA	NA	NA	NA	NA	NA	420	421	2.31438e-05	736	737	4.08504e-05	NA	NA	NA	NA	NA	NA	NA	NA	NA	7	8	2.43971e-07	15	16
INFNTRFV	ATTAACTTCAACACACGTTTCGTA	Pool 13	1261	1262	0.000136588	1212	1213	6.45403e-05	76	77	1.25532e-06	870	871	1.40986e-05	NA	NA	NA	NA	NA	NA	NA	NA	NA	NA	NA	NA	NA	NA	NA	2710	2711	0.000149033	2626	2627	0.000145609	NA	NA	NA	NA	NA	NA	NA	NA	NA	1414	1415	4.31524e-05	769	770
INFTWINS	ATTAATTTTACTTGGATAAACTCG	Pool 13	181	182	1.96981e-05	492	493	2.62311e-05	22	23	3.74966e-07	NA	1	1.61867e-08	NA	NA	NA	NA	NA	NA	NA	NA	NA	NA	NA	NA	NA	NA	NA	672	673	3.6997e-05	832	833	4.61715e-05	NA	NA	NA	NA	NA	NA	NA	NA	NA	33	34	1.03688e-06	110	111
INFVRNTV	ATTAACTTTGTCCGAAATACTGTT	Pool 13	5467	5468	0.00059181	116	117	6.22524e-06	28	29	4.72784e-07	468	469	7.59158e-06	NA	NA	NA	NA	NA	NA	NA	NA	NA	NA	NA	NA	NA	NA	NA	1808	1809	9.94467e-05	1908	1909	0.000105812	NA	NA	NA	NA	NA	NA	NA	NA	NA	762	763	2.32687e-05	177	178
INHFSCDL	ATCAATCATTTTAGTTGTGACCTT	Pool 13	631	632	6.84023e-05	232	233	1.23973e-05	526	527	8.59162e-06	40	41	6.63656e-07	NA	NA	NA	NA	NA	NA	NA	NA	NA	NA	NA	NA	NA	NA	NA	1258	1259	6.92114e-05	1500	1501	8.31974e-05	NA	NA	NA	NA	NA	NA	NA	NA	NA	171	172	5.24538e-06	50	51
INIFSSSF	ATTAATATATTTAGCTCGTCCTTT	Pool 13	325	326	3.52835e-05	178	179	9.52409e-06	94	95	1.54877e-06	494	495	8.01243e-06	NA	NA	NA	NA	NA	NA	NA	NA	NA	NA	NA	NA	NA	NA	NA	602	603	3.31489e-05	1206	1207	6.69015e-05	NA	NA	NA	NA	NA	NA	NA	NA	NA	100	101	3.08014e-06	261	262
INIMLLSI	ATCAACATAATGCTACTTTCTATA	Pool 13	3086	3087	0.000334111	2326	2327	0.000123813	2214	2215	3.61109e-05	1910	1911	3.09328e-05	NA	NA	NA	NA	NA	NA	NA	NA	NA	NA	NA	NA	NA	NA	NA	7552	7553	0.000415213	6238	6239	0.000345815	NA	NA	NA	NA	NA	NA	NA	NA	NA	2251	2252	6.86779e-05	2954	2955
INIVPFGI	ATCAACATAGTACCATTTGGTATT	Pool 13	53	54	5.8445e-06	18	19	1.01094e-06	14	15	2.44543e-07	704	705	1.14116e-05	NA	NA	NA	NA	NA	NA	NA	NA	NA	NA	NA	NA	NA	NA	NA	696	697	3.83164e-05	156	157	8.70219e-06	NA	NA	NA	NA	NA	NA	NA	NA	NA	4	5	1.52482e-07	4	5
INLESQYL	ATAAATTTGGAATCGCAGTACTTG	Pool 13	1507	1508	0.000163213	2134	2135	0.000113597	532	533	8.68944e-06	194	195	3.15641e-06	NA	NA	NA	NA	NA	NA	NA	NA	NA	NA	NA	NA	NA	NA	NA	3712	3713	0.000204116	4832	4833	0.000267883	NA	NA	NA	NA	NA	NA	NA	NA	NA	445	446	1.36014e-05	541	542
INLHELLL	ATAAATTTACATGAACTACTGCTA	Pool 13	1164	1165	0.00012609	2256	2257	0.000120089	606	607	9.89585e-06	1412	1413	2.28718e-05	NA	NA	NA	NA	NA	NA	NA	NA	NA	NA	NA	NA	NA	NA	NA	2378	2379	0.000130781	3590	3591	0.000199042	NA	NA	NA	NA	NA	NA	NA	NA	NA	1332	1333	4.06517e-05	833	834
INLNLGIL	ATCAACTTAAATCTTGGGATACTG	Pool 13	43	44	4.76218e-06	6	7	3.7245e-07	40	41	6.68418e-07	NA	1	1.61867e-08	NA	NA	NA	NA	NA	NA	NA	NA	NA	NA	NA	NA	NA	NA	NA	138	139	7.64129e-06	66	67	3.71367e-06	NA	NA	NA	NA	NA	NA	NA	NA	NA	2	3	9.14892e-08	4	5
INLSFNVF	ATAAATCTGAGCTTCAATGTTTTC	Pool 13	2101	2102	0.000227503	1992	1993	0.000106042	422	423	6.89612e-06	1628	1629	2.63682e-05	NA	NA	NA	NA	NA	NA	NA	NA	NA	NA	NA	NA	NA	NA	NA	5940	5941	0.000326596	8556	8557	0.000474297	NA	NA	NA	NA	NA	NA	NA	NA	NA	1353	1354	4.12921e-05	2861	2862
INLSSNRL	ATCAACCTTAGTAGTAACCGGTTA	Pool 13	69	70	7.5762e-06	58	59	3.13922e-06	NA	1	1.63029e-08	46	47	7.60776e-07	NA	NA	NA	NA	NA	NA	NA	NA	NA	NA	NA	NA	NA	NA	NA	172	173	9.51038e-06	102	103	5.70908e-06	NA	NA	NA	NA	NA	NA	NA	NA	NA	1	2	6.09928e-08	11	12
INNIFLYL	ATTAATAATATATTTCTCTACCTA	Pool 13	18483	18484	0.00200055	1402	1403	7.46497e-05	368	369	6.01576e-06	1532	1533	2.48143e-05	NA	NA	NA	NA	NA	NA	NA	NA	NA	NA	NA	NA	NA	NA	NA	5008	5009	0.000275361	10984	10985	0.000608876	NA	NA	NA	NA	NA	NA	NA	NA	NA	463	464	1.41503e-05	8537	8538
INNIIFSL	ATAAACAATATCATCTTCTCTCTC	Pool 13	702	703	7.60867e-05	352	353	1.87821e-05	104	105	1.7118e-06	2814	2815	4.55656e-05	NA	NA	NA	NA	NA	NA	NA	NA	NA	NA	NA	NA	NA	NA	NA	2592	2593	0.000142546	1786	1787	9.90498e-05	NA	NA	NA	NA	NA	NA	NA	NA	NA	79	80	2.43971e-06	322	323
INPICYAL	ATTAATCCGATTTGCTACGCTTTA	Pool 13	NA	1	1.08231e-07	NA	1	5.32072e-08	NA	1	1.63029e-08	NA	1	1.61867e-08	NA	NA	NA	NA	NA	NA	NA	NA	NA	NA	NA	NA	NA	NA	NA	NA	1	5.49733e-08	NA	1	5.5428e-08	NA	NA	NA	NA	NA	NA	NA	NA	NA	NA	1	3.04964e-08	NA	1
INPLLYRL	ATCAATCCTTTATTGTATCGGTTA	Pool 13	108	109	1.17972e-05	104	105	5.58676e-06	4	5	8.15144e-08	14	15	2.42801e-07	NA	NA	NA	NA	NA	NA	NA	NA	NA	NA	NA	NA	NA	NA	NA	228	229	1.25889e-05	352	353	1.95661e-05	NA	NA	NA	NA	NA	NA	NA	NA	NA	41	42	1.28085e-06	15	16
INPRHTLI	ATAAATCCTAGACACACCTTAATA	Pool 13	200	201	2.17545e-05	188	189	1.00562e-05	9516	9517	0.000155155	392	393	6.36138e-06	NA	NA	NA	NA	NA	NA	NA	NA	NA	NA	NA	NA	NA	NA	NA	604	605	3.32588e-05	736	737	4.08504e-05	NA	NA	NA	NA	NA	NA	NA	NA	NA	18	19	5.79431e-07	40	41
INQSFNAV	ATTAACCAATCATTCAACGCCGTT	Pool 13	474	475	5.14099e-05	158	159	8.45994e-06	116	117	1.90744e-06	2724	2725	4.41088e-05	NA	NA	NA	NA	NA	NA	NA	NA	NA	NA	NA	NA	NA	NA	NA	1946	1947	0.000107033	1826	1827	0.000101267	NA	NA	NA	NA	NA	NA	NA	NA	NA	485	486	1.48212e-05	229	230
INQSLMTL	ATCAATCAATCCCTCATGACGCTA	Pool 13	98	99	1.07149e-05	4	5	2.66036e-07	8	9	1.46726e-07	2	3	4.85602e-08	NA	NA	NA	NA	NA	NA	NA	NA	NA	NA	NA	NA	NA	NA	NA	140	141	7.75124e-06	214	215	1.1917e-05	NA	NA	NA	NA	NA	NA	NA	NA	NA	NA	1	3.04964e-08	2	3
INRSFLSF	ATCAACAGATCCTTTCTGTCGTTT	Pool 13	1691	1692	0.000183128	712	713	3.79367e-05	138	139	2.2661e-06	2188	2189	3.54327e-05	NA	NA	NA	NA	NA	NA	NA	NA	NA	NA	NA	NA	NA	NA	NA	2798	2799	0.00015387	2608	2609	0.000144612	NA	NA	NA	NA	NA	NA	NA	NA	NA	348	349	1.06432e-05	761	762
INRSLLAL	ATAAACCGGTCATTGCTTGCGCTT	Pool 13	1252	1253	0.000135614	2640	2641	0.00014052	10896	10897	0.000177652	1442	1443	2.33574e-05	NA	NA	NA	NA	NA	NA	NA	NA	NA	NA	NA	NA	NA	NA	NA	1504	1505	8.27348e-05	1596	1597	8.85184e-05	NA	NA	NA	NA	NA	NA	NA	NA	NA	858	859	2.61964e-05	346	347
INRTYFPF	ATCAATCGTACATACTTCCCGTTT	Pool 13	744	745	8.06324e-05	574	575	3.05941e-05	82	83	1.35314e-06	1552	1553	2.5138e-05	NA	NA	NA	NA	NA	NA	NA	NA	NA	NA	NA	NA	NA	NA	NA	2418	2419	0.00013298	1930	1931	0.000107031	NA	NA	NA	NA	NA	NA	NA	NA	NA	90	91	2.77517e-06	434	435
INSRHPSL	ATAAATAGTCGTCACCCGTCCTTA	Pool 13	1367	1368	0.000148061	876	877	4.66627e-05	36	37	6.03207e-07	234	235	3.80388e-06	NA	NA	NA	NA	NA	NA	NA	NA	NA	NA	NA	NA	NA	NA	NA	4196	4197	0.000230723	5668	5669	0.000314221	NA	NA	NA	NA	NA	NA	NA	NA	NA	213	214	6.52623e-06	358	359
INSYLKPM	ATCAATTCTTACTTAAAACCGATG	Pool 13	286	287	3.10624e-05	278	279	1.48448e-05	8	9	1.46726e-07	154	155	2.50894e-06	NA	NA	NA	NA	NA	NA	NA	NA	NA	NA	NA	NA	NA	NA	NA	640	641	3.52379e-05	732	733	4.06287e-05	NA	NA	NA	NA	NA	NA	NA	NA	NA	115	116	3.53758e-06	45	46
INTYRGLL	ATAAACACTTACCGCGGGTTGCTG	Pool 13	11	12	1.29878e-06	NA	1	5.32072e-08	NA	1	1.63029e-08	NA	1	1.61867e-08	NA	NA	NA	NA	NA	NA	NA	NA	NA	NA	NA	NA	NA	NA	NA	NA	1	5.49733e-08	NA	1	5.5428e-08	NA	NA	NA	NA	NA	NA	NA	NA	NA	NA	1	3.04964e-08	NA	1
INVEFPVV	ATCAACGTTGAATTCCCGGTGGTA	Pool 13	27	28	3.03048e-06	NA	1	5.32072e-08	NA	1	1.63029e-08	6	7	1.13307e-07	NA	NA	NA	NA	NA	NA	NA	NA	NA	NA	NA	NA	NA	NA	NA	102	103	5.66225e-06	224	225	1.24713e-05	NA	NA	NA	NA	NA	NA	NA	NA	NA	NA	1	3.04964e-08	1	2
INVTGYYL	ATTAACGTAACAGGATATTATCTC	Pool 13	313	314	3.39847e-05	180	181	9.6305e-06	112	113	1.84223e-06	10	11	1.78054e-07	NA	NA	NA	NA	NA	NA	NA	NA	NA	NA	NA	NA	NA	NA	NA	552	553	3.04002e-05	544	545	3.02082e-05	NA	NA	NA	NA	NA	NA	NA	NA	NA	156	157	4.78793e-06	76	77
INWIQQVL	ATCAATTGGATACAACAAGTCCTT	Pool 13	363	364	3.93963e-05	2070	2071	0.000110192	150	151	2.46174e-06	1384	1385	2.24186e-05	NA	NA	NA	NA	NA	NA	NA	NA	NA	NA	NA	NA	NA	NA	NA	1318	1319	7.25098e-05	6910	6911	0.000383063	NA	NA	NA	NA	NA	NA	NA	NA	NA	550	551	1.68035e-05	198	199
INYADYTL	ATAAACTACGCGGACTACACACTA	Pool 13	12848	12849	0.00139067	64430	64431	0.00342819	108960	108961	0.00177638	287284	287285	0.0046502	NA	NA	NA	NA	NA	NA	NA	NA	NA	NA	NA	NA	NA	NA	NA	37082	37083	0.00203857	26086	26087	0.00144595	NA	NA	NA	NA	NA	NA	NA	NA	NA	88875	88876	0.0027104	100330	100331
INYLMLFI	ATTAATTACTTAATGCTCTTTATA	Pool 13	477	478	5.17346e-05	1272	1273	6.77328e-05	336	337	5.49407e-06	64	65	1.05214e-06	NA	NA	NA	NA	NA	NA	NA	NA	NA	NA	NA	NA	NA	NA	NA	1528	1529	8.40542e-05	1708	1709	9.47264e-05	NA	NA	NA	NA	NA	NA	NA	NA	NA	215	216	6.58722e-06	816	817
INYNHKFI	ATCAACTATAATCACAAATTTATA	Pool 13	7685	7686	0.000831867	792	793	4.21933e-05	146	147	2.39652e-06	288	289	4.67796e-06	NA	NA	NA	NA	NA	NA	NA	NA	NA	NA	NA	NA	NA	NA	NA	2472	2473	0.000135949	1972	1973	0.000109359	NA	NA	NA	NA	NA	NA	NA	NA	NA	938	939	2.86361e-05	809	810
INYSIIVI	ATTAATTACTCGATCATCGTTATT	Pool 13	2401	2402	0.000259972	296	297	1.58025e-05	174	175	2.853e-06	1260	1261	2.04115e-05	NA	NA	NA	NA	NA	NA	NA	NA	NA	NA	NA	NA	NA	NA	NA	3838	3839	0.000211043	2812	2813	0.000155919	NA	NA	NA	NA	NA	NA	NA	NA	NA	311	312	9.51487e-06	224	225
INYSLIEI	ATTAATTACTCATTAATAGAAATC	Pool 13	803	804	8.70181e-05	832	833	4.43216e-05	158	159	2.59216e-06	162	163	2.63844e-06	NA	NA	NA	NA	NA	NA	NA	NA	NA	NA	NA	NA	NA	NA	NA	1110	1111	6.10753e-05	2038	2039	0.000113018	NA	NA	NA	NA	NA	NA	NA	NA	NA	177	178	5.42836e-06	402	403
INYTDCHI	ATTAATTATACAGATTGCCACATA	Pool 13	675	676	7.31645e-05	1156	1157	6.15607e-05	60	61	9.94476e-07	646	647	1.04728e-05	NA	NA	NA	NA	NA	NA	NA	NA	NA	NA	NA	NA	NA	NA	NA	1238	1239	6.81119e-05	1508	1509	8.36408e-05	NA	NA	NA	NA	NA	NA	NA	NA	NA	39	40	1.21986e-06	916	917
INYYKFSS	ATTAATTACTACAAATTCTCATCC	Pool 13	280	281	3.0413e-05	20	21	1.11735e-06	12	13	2.11937e-07	428	429	6.94411e-06	NA	NA	NA	NA	NA	NA	NA	NA	NA	NA	NA	NA	NA	NA	NA	1520	1521	8.36144e-05	874	875	4.84995e-05	NA	NA	NA	NA	NA	NA	NA	NA	NA	7	8	2.43971e-07	19	20
IPALYNNL	ATTCCAGCCCTATACAACAATCTT	Pool 13	136	137	1.48277e-05	66	67	3.56488e-06	4	5	8.15144e-08	4	5	8.09336e-08	NA	NA	NA	NA	NA	NA	NA	NA	NA	NA	NA	NA	NA	NA	NA	294	295	1.62171e-05	372	373	2.06746e-05	NA	NA	NA	NA	NA	NA	NA	NA	NA	3	4	1.21986e-07	16	17
IPFFYMTA	ATACCGTTCTTTTACATGACAGCT	Pool 13	5678	5679	0.000614647	3224	3225	0.000171593	1172	1173	1.91233e-05	2510	2511	4.06449e-05	NA	NA	NA	NA	NA	NA	NA	NA	NA	NA	NA	NA	NA	NA	NA	10636	10637	0.000584751	43432	43433	0.0024074	NA	NA	NA	NA	NA	NA	NA	NA	NA	3115	3116	9.50268e-05	3862	3863
IPFLKANL	ATTCCCTTCCTCAAAGCTAATCTC	Pool 13	498	499	5.40075e-05	264	265	1.40999e-05	570	571	9.30895e-06	128	129	2.08809e-06	NA	NA	NA	NA	NA	NA	NA	NA	NA	NA	NA	NA	NA	NA	NA	1248	1249	6.86617e-05	1462	1463	8.10911e-05	NA	NA	NA	NA	NA	NA	NA	NA	NA	1055	1056	3.22042e-05	153	154
IPFYIQAL	ATTCCGTTTTATATTCAGGCTTTA	Pool 13	2431	2432	0.000263219	3878	3879	0.000206391	854	855	1.3939e-05	2888	2889	4.67635e-05	NA	NA	NA	NA	NA	NA	NA	NA	NA	NA	NA	NA	NA	NA	NA	5990	5991	0.000329345	5520	5521	0.000306018	NA	NA	NA	NA	NA	NA	NA	NA	NA	1885	1886	5.75162e-05	1552	1553
IPIFLMYL	ATTCCAATATTCCTGATGTATTTA	Pool 13	2356	2357	0.000255102	21412	21413	0.00113933	28	29	4.72784e-07	606	607	9.82534e-06	NA	NA	NA	NA	NA	NA	NA	NA	NA	NA	NA	NA	NA	NA	NA	6884	6885	0.000378491	237012	237013	0.0131371	NA	NA	NA	NA	NA	NA	NA	NA	NA	74	75	2.28723e-06	132	133
IPLLFKML	ATTCCACTATTGTTCAAGATGCTC	Pool 13	424	425	4.59984e-05	244	245	1.30358e-05	168	169	2.75519e-06	7700	7701	0.000124654	NA	NA	NA	NA	NA	NA	NA	NA	NA	NA	NA	NA	NA	NA	NA	1202	1203	6.61329e-05	1190	1191	6.60147e-05	NA	NA	NA	NA	NA	NA	NA	NA	NA	150	151	4.60496e-06	233	234
IPNIYAAL	ATTCCTAATATATATGCTGCATTG	Pool 13	6473	6474	0.000700691	10986	10987	0.000584587	7230	7231	0.000117886	38192	38193	0.00061822	NA	NA	NA	NA	NA	NA	NA	NA	NA	NA	NA	NA	NA	NA	NA	17608	17609	0.000968025	18360	18361	0.00101771	NA	NA	NA	NA	NA	NA	NA	NA	NA	9612	9613	0.000293162	18012	18013
IPVFAAML	ATACCGGTATTTGCCGCGATGCTG	Pool 13	477	478	5.17346e-05	44	45	2.39432e-06	42	43	7.01024e-07	8	9	1.45681e-07	NA	NA	NA	NA	NA	NA	NA	NA	NA	NA	NA	NA	NA	NA	NA	810	811	4.45833e-05	5012	5013	0.00027786	NA	NA	NA	NA	NA	NA	NA	NA	NA	3	4	1.21986e-07	4	5
IQFGFATL	ATACAGTTCGGATTTGCAACTCTA	Pool 13	7350	7351	0.00079561	1220	1221	6.4966e-05	544	545	8.88507e-06	1400	1401	2.26776e-05	NA	NA	NA	NA	NA	NA	NA	NA	NA	NA	NA	NA	NA	NA	NA	5230	5231	0.000287565	4656	4657	0.000258128	NA	NA	NA	NA	NA	NA	NA	NA	NA	1372	1373	4.18715e-05	793	794
IQFHYGGC	ATACAGTTCCATTATGGTGGGTGT	Pool 13	38	39	4.22103e-06	NA	1	5.32072e-08	34	35	5.70601e-07	NA	1	1.61867e-08	NA	NA	NA	NA	NA	NA	NA	NA	NA	NA	NA	NA	NA	NA	NA	54	55	3.02353e-06	32	33	1.82912e-06	NA	NA	NA	NA	NA	NA	NA	NA	NA	4	5	1.52482e-07	NA	1
IQFIQSYF	ATTCAGTTTATCCAAAGCTACTTC	Pool 13	524	525	5.68215e-05	150	151	8.03429e-06	94	95	1.54877e-06	16	17	2.75174e-07	NA	NA	NA	NA	NA	NA	NA	NA	NA	NA	NA	NA	NA	NA	NA	1150	1151	6.32743e-05	1216	1217	6.74558e-05	NA	NA	NA	NA	NA	NA	NA	NA	NA	23	24	7.31913e-07	115	116
IQFLISLV	ATCCAATTCCTAATCAGCCTCGTT	Pool 13	301	302	3.26859e-05	678	679	3.61277e-05	34	35	5.70601e-07	404	405	6.55562e-06	NA	NA	NA	NA	NA	NA	NA	NA	NA	NA	NA	NA	NA	NA	NA	1386	1387	7.6248e-05	858	859	4.76126e-05	NA	NA	NA	NA	NA	NA	NA	NA	NA	2063	2064	6.29446e-05	564	565
IQFLLAAV	ATCCAATTCTTATTAGCAGCCGTA	Pool 13	6474	6475	0.000700799	11044	11045	0.000587673	232	233	3.79857e-06	918	919	1.48756e-05	NA	NA	NA	NA	NA	NA	NA	NA	NA	NA	NA	NA	NA	NA	NA	2278	2279	0.000125284	982	983	5.44857e-05	NA	NA	NA	NA	NA	NA	NA	NA	NA	212	213	6.49573e-06	3059	3060
IQFSAGSV	ATACAGTTTTCGGCGGGCTCTGTA	Pool 13	800	801	8.66934e-05	648	649	3.45315e-05	100	101	1.64659e-06	22	23	3.72295e-07	NA	NA	NA	NA	NA	NA	NA	NA	NA	NA	NA	NA	NA	NA	NA	1086	1087	5.9756e-05	1362	1363	7.55483e-05	NA	NA	NA	NA	NA	NA	NA	NA	NA	7	8	2.43971e-07	2308	2309
IQFTHCLV	ATTCAATTTACCCACTGTCTAGTT	Pool 13	2039	2040	0.000220792	880	881	4.68755e-05	776	777	1.26673e-05	17460	17461	0.000282636	NA	NA	NA	NA	NA	NA	NA	NA	NA	NA	NA	NA	NA	NA	NA	5900	5901	0.000324397	5730	5731	0.000317658	NA	NA	NA	NA	NA	NA	NA	NA	NA	591	592	1.80539e-05	1490	1491
IQFVYHLI	ATCCAGTTCGTCTATCACCTAATA	Pool 13	313	314	3.39847e-05	156	157	8.35353e-06	10	11	1.79332e-07	8	9	1.45681e-07	NA	NA	NA	NA	NA	NA	NA	NA	NA	NA	NA	NA	NA	NA	NA	816	817	4.49132e-05	1672	1673	9.2731e-05	NA	NA	NA	NA	NA	NA	NA	NA	NA	423	424	1.29305e-05	1497	1498
IQIFRAHL	ATTCAAATCTTTCGAGCTCACCTG	Pool 13	73	74	8.00913e-06	58	59	3.13922e-06	14	15	2.44543e-07	NA	1	1.61867e-08	NA	NA	NA	NA	NA	NA	NA	NA	NA	NA	NA	NA	NA	NA	NA	262	263	1.4458e-05	204	205	1.13627e-05	NA	NA	NA	NA	NA	NA	NA	NA	NA	63	64	1.95177e-06	4	5
IQKMFEKL	ATTCAGAAAATGTTCGAGAAACTG	Pool 13	372	373	4.03703e-05	156	157	8.35353e-06	94	95	1.54877e-06	162	163	2.63844e-06	NA	NA	NA	NA	NA	NA	NA	NA	NA	NA	NA	NA	NA	NA	NA	680	681	3.74368e-05	526	527	2.92105e-05	NA	NA	NA	NA	NA	NA	NA	NA	NA	70	71	2.16524e-06	85	86
IQLLCYLL	ATCCAATTGCTCTGTTATCTGTTG	Pool 13	7848	7849	0.000849509	17966	17967	0.000955974	966274	966275	0.0157531	273102	273103	0.00442064	NA	NA	NA	NA	NA	NA	NA	NA	NA	NA	NA	NA	NA	NA	NA	22124	22125	0.00121628	19736	19737	0.00109398	NA	NA	NA	NA	NA	NA	NA	NA	NA	25380	25381	0.000774029	26795	26796
IQMAKFRI	ATCCAGATGGCCAAATTTCGCATA	Pool 13	346	347	3.75563e-05	190	191	1.01626e-05	16	17	2.77149e-07	2	3	4.85602e-08	NA	NA	NA	NA	NA	NA	NA	NA	NA	NA	NA	NA	NA	NA	NA	828	829	4.55729e-05	664	665	3.68596e-05	NA	NA	NA	NA	NA	NA	NA	NA	NA	NA	1	3.04964e-08	20	21
IQMYFLLL	ATACAAATGTACTTCCTGTTGTTA	Pool 13	1169	1170	0.000126631	386	387	2.05912e-05	56	57	9.29264e-07	1948	1949	3.15479e-05	NA	NA	NA	NA	NA	NA	NA	NA	NA	NA	NA	NA	NA	NA	NA	2648	2649	0.000145624	1738	1739	9.63892e-05	NA	NA	NA	NA	NA	NA	NA	NA	NA	48	49	1.49432e-06	727	728
IQQVLAPL	ATTCAGCAAGTGCTGGCGCCGTTG	Pool 13	198	199	2.15381e-05	566	567	3.01685e-05	40	41	6.68418e-07	804	805	1.30303e-05	NA	NA	NA	NA	NA	NA	NA	NA	NA	NA	NA	NA	NA	NA	NA	462	463	2.54526e-05	478	479	2.655e-05	NA	NA	NA	NA	NA	NA	NA	NA	NA	2	3	9.14892e-08	72	73
IQTMHSNL	ATCCAGACAATGCATTCAAATCTA	Pool 13	238	239	2.58673e-05	10	11	5.85279e-07	NA	1	1.63029e-08	448	449	7.26784e-06	NA	NA	NA	NA	NA	NA	NA	NA	NA	NA	NA	NA	NA	NA	NA	396	397	2.18244e-05	2102	2103	0.000116565	NA	NA	NA	NA	NA	NA	NA	NA	NA	4	5	1.52482e-07	NA	1
IQVLFTAV	ATTCAGGTTTTGTTTACAGCCGTT	Pool 13	1606	1607	0.000173928	732	733	3.90009e-05	840	841	1.37107e-05	348	349	5.64917e-06	NA	NA	NA	NA	NA	NA	NA	NA	NA	NA	NA	NA	NA	NA	NA	2836	2837	0.000155959	4082	4083	0.000226312	NA	NA	NA	NA	NA	NA	NA	NA	NA	833	834	2.5434e-05	604	605
IQWIRHHV	ATACAGTGGATTAGGCATCATGTA	Pool 13	210	211	2.28368e-05	152	153	8.1407e-06	84	85	1.38574e-06	4	5	8.09336e-08	NA	NA	NA	NA	NA	NA	NA	NA	NA	NA	NA	NA	NA	NA	NA	674	675	3.7107e-05	308	309	1.71272e-05	NA	NA	NA	NA	NA	NA	NA	NA	NA	68	69	2.10425e-06	50	51
IQYKKAQL	ATTCAATACAAGAAAGCTCAATTG	Pool 13	129	130	1.40701e-05	54	55	2.9264e-06	100	101	1.64659e-06	354	355	5.74629e-06	NA	NA	NA	NA	NA	NA	NA	NA	NA	NA	NA	NA	NA	NA	NA	226	227	1.24789e-05	46	47	2.60511e-06	NA	NA	NA	NA	NA	NA	NA	NA	NA	95	96	2.92765e-06	7	8
IQYRDANL	ATACAATACAGGGATGCCAACCTC	Pool 13	59	60	6.49389e-06	NA	1	5.32072e-08	NA	1	1.63029e-08	NA	1	1.61867e-08	NA	NA	NA	NA	NA	NA	NA	NA	NA	NA	NA	NA	NA	NA	NA	118	119	6.54182e-06	170	171	9.47818e-06	NA	NA	NA	NA	NA	NA	NA	NA	NA	5	6	1.82978e-07	NA	1
IRYALLLL	ATTCGCTATGCATTGCTTCTGCTA	Pool 13	7032	7033	0.000761192	24074	24075	0.00128096	644330	644331	0.0105045	118204	118205	0.00191335	NA	NA	NA	NA	NA	NA	NA	NA	NA	NA	NA	NA	NA	NA	NA	11402	11403	0.000626861	11378	11379	0.000630715	NA	NA	NA	NA	NA	NA	NA	NA	NA	134209	134210	0.00409292	29250	29251
ISAALALM	ATTTCAGCCGCATTAGCCCTCATG	Pool 13	428	429	4.64313e-05	110	111	5.906e-06	4	5	8.15144e-08	102	103	1.66723e-06	NA	NA	NA	NA	NA	NA	NA	NA	NA	NA	NA	NA	NA	NA	NA	3420	3421	0.000188064	1830	1831	0.000101489	NA	NA	NA	NA	NA	NA	NA	NA	NA	76	77	2.34822e-06	30	31
ISAFLAVF	ATCAGCGCATTCCTAGCTGTGTTC	Pool 13	2294	2295	0.000248391	32	33	1.75584e-06	28	29	4.72784e-07	138	139	2.24996e-06	NA	NA	NA	NA	NA	NA	NA	NA	NA	NA	NA	NA	NA	NA	NA	1356	1357	7.45988e-05	632	633	3.50859e-05	NA	NA	NA	NA	NA	NA	NA	NA	NA	96	97	2.95815e-06	55	56
ISAKSHNL	ATATCGGCCAAGTCACATAACCTA	Pool 13	776	777	8.40959e-05	572	573	3.04877e-05	166	167	2.72258e-06	2706	2707	4.38175e-05	NA	NA	NA	NA	NA	NA	NA	NA	NA	NA	NA	NA	NA	NA	NA	2614	2615	0.000143755	1902	1903	0.000105479	NA	NA	NA	NA	NA	NA	NA	NA	NA	89	90	2.74468e-06	64	65
ISALSSGL	ATTAGCGCACTCTCATCGGGCCTG	Pool 13	202	203	2.1971e-05	20	21	1.11735e-06	NA	1	1.63029e-08	42	43	6.96029e-07	NA	NA	NA	NA	NA	NA	NA	NA	NA	NA	NA	NA	NA	NA	NA	600	601	3.3039e-05	978	979	5.4264e-05	NA	NA	NA	NA	NA	NA	NA	NA	NA	NA	1	3.04964e-08	113	114
ISALWEGL	ATCTCTGCCCTGTGGGAGGGATTA	Pool 13	927	928	0.000100439	604	605	3.21904e-05	654	655	1.06784e-05	2212	2213	3.58212e-05	NA	NA	NA	NA	NA	NA	NA	NA	NA	NA	NA	NA	NA	NA	NA	2468	2469	0.000135729	2426	2427	0.000134524	NA	NA	NA	NA	NA	NA	NA	NA	NA	672	673	2.05241e-05	166	167
ISAQIGTL	ATTAGCGCCCAGATCGGGACGTTG	Pool 13	5	6	6.49389e-07	2	3	1.59622e-07	NA	1	1.63029e-08	NA	1	1.61867e-08	NA	NA	NA	NA	NA	NA	NA	NA	NA	NA	NA	NA	NA	NA	NA	86	87	4.78268e-06	NA	1	5.5428e-08	NA	NA	NA	NA	NA	NA	NA	NA	NA	NA	1	3.04964e-08	NA	1
ISASRWLL	ATCTCTGCATCGAGATGGCTATTA	Pool 13	8541	8542	0.000924513	7018	7019	0.000373461	1000	1001	1.63192e-05	1876	1877	3.03825e-05	NA	NA	NA	NA	NA	NA	NA	NA	NA	NA	NA	NA	NA	NA	NA	10704	10705	0.000588489	11734	11735	0.000650447	NA	NA	NA	NA	NA	NA	NA	NA	NA	5112	5113	0.000155928	4555	4556
ISAYRKLL	ATTTCAGCCTACCGAAAGTTGCTA	Pool 13	1113	1114	0.00012057	178	179	9.52409e-06	78	79	1.28793e-06	198	199	3.22116e-06	NA	NA	NA	NA	NA	NA	NA	NA	NA	NA	NA	NA	NA	NA	NA	2460	2461	0.000135289	6732	6733	0.000373196	NA	NA	NA	NA	NA	NA	NA	NA	NA	80	81	2.47021e-06	318	319
ISCSFGSV	ATATCGTGCTCTTTTGGATCCGTC	Pool 13	6777	6778	0.000733593	2158	2159	0.000114874	762	763	1.24391e-05	7308	7309	0.000118309	NA	NA	NA	NA	NA	NA	NA	NA	NA	NA	NA	NA	NA	NA	NA	10158	10159	0.000558474	6818	6819	0.000377963	NA	NA	NA	NA	NA	NA	NA	NA	NA	3554	3555	0.000108415	1295	1296
ISDFLAFL	ATTAGTGATTTTCTCGCGTTCCTC	Pool 13	957	958	0.000103686	102	103	5.48034e-06	48	49	7.98841e-07	148	149	2.41182e-06	NA	NA	NA	NA	NA	NA	NA	NA	NA	NA	NA	NA	NA	NA	NA	1548	1549	8.51536e-05	1080	1081	5.99176e-05	NA	NA	NA	NA	NA	NA	NA	NA	NA	113	114	3.47659e-06	116	117
ISDLLFLL	ATCTCTGACCTTCTCTTCCTACTC	Pool 13	1239	1240	0.000134207	1676	1677	8.92285e-05	2572	2573	4.19473e-05	2100	2101	3.40083e-05	NA	NA	NA	NA	NA	NA	NA	NA	NA	NA	NA	NA	NA	NA	NA	2740	2741	0.000150682	2980	2981	0.000165231	NA	NA	NA	NA	NA	NA	NA	NA	NA	645	646	1.97007e-05	649	650
ISDRLVTL	ATATCAGACAGACTCGTGACACTG	Pool 13	81	82	8.87498e-06	28	29	1.54301e-06	28	29	4.72784e-07	NA	1	1.61867e-08	NA	NA	NA	NA	NA	NA	NA	NA	NA	NA	NA	NA	NA	NA	NA	188	189	1.039e-05	198	199	1.10302e-05	NA	NA	NA	NA	NA	NA	NA	NA	NA	NA	1	3.04964e-08	20	21
ISDSFFFL	ATCAGCGATTCTTTCTTCTTCTTA	Pool 13	3030	3031	0.00032805	1444	1445	7.68844e-05	624	625	1.01893e-05	948	949	1.53612e-05	NA	NA	NA	NA	NA	NA	NA	NA	NA	NA	NA	NA	NA	NA	NA	8514	8515	0.000468098	6164	6165	0.000341713	NA	NA	NA	NA	NA	NA	NA	NA	NA	3189	3190	9.72835e-05	798	799
ISEYYGML	ATCAGTGAATATTATGGGATGCTT	Pool 13	268	269	2.91143e-05	164	165	8.77919e-06	42	43	7.01024e-07	4	5	8.09336e-08	NA	NA	NA	NA	NA	NA	NA	NA	NA	NA	NA	NA	NA	NA	NA	754	755	4.15048e-05	1156	1157	6.41301e-05	NA	NA	NA	NA	NA	NA	NA	NA	NA	50	51	1.55532e-06	245	246
ISFCNSGL	ATATCCTTCTGTAACAGTGGCCTC	Pool 13	NA	1	1.08231e-07	NA	1	5.32072e-08	NA	1	1.63029e-08	NA	1	1.61867e-08	NA	NA	NA	NA	NA	NA	NA	NA	NA	NA	NA	NA	NA	NA	NA	NA	1	5.49733e-08	NA	1	5.5428e-08	NA	NA	NA	NA	NA	NA	NA	NA	NA	NA	1	3.04964e-08	NA	1
ISFCPTDL	ATCTCTTTCTGTCCTACAGATCTC	Pool 13	704	705	7.63032e-05	98	99	5.26751e-06	166	167	2.72258e-06	148	149	2.41182e-06	NA	NA	NA	NA	NA	NA	NA	NA	NA	NA	NA	NA	NA	NA	NA	1318	1319	7.25098e-05	1140	1141	6.32433e-05	NA	NA	NA	NA	NA	NA	NA	NA	NA	245	246	7.50211e-06	415	416
ISFENVSF	ATCTCTTTTGAGAATGTAAGCTTC	Pool 13	958	959	0.000103794	16522	16523	0.000879142	3862	3863	6.2978e-05	13154	13155	0.000212936	NA	NA	NA	NA	NA	NA	NA	NA	NA	NA	NA	NA	NA	NA	NA	3114	3115	0.000171242	4082	4083	0.000226312	NA	NA	NA	NA	NA	NA	NA	NA	NA	5322	5323	0.000162332	8392	8393
ISFGCCMM	ATTTCGTTTGGTTGTTGCATGATG	Pool 13	1618	1619	0.000175227	754	755	4.01714e-05	1184	1185	1.93189e-05	3326	3327	5.38532e-05	NA	NA	NA	NA	NA	NA	NA	NA	NA	NA	NA	NA	NA	NA	NA	4696	4697	0.00025821	4284	4285	0.000237509	NA	NA	NA	NA	NA	NA	NA	NA	NA	1001	1002	3.05574e-05	2058	2059
ISFIDYFI	ATTTCCTTCATCGACTATTTCATA	Pool 13	19230	19231	0.0020814	4656	4657	0.000247786	2066	2067	3.36981e-05	4434	4435	7.17881e-05	NA	NA	NA	NA	NA	NA	NA	NA	NA	NA	NA	NA	NA	NA	NA	31662	31663	0.00174062	23760	23761	0.00131702	NA	NA	NA	NA	NA	NA	NA	NA	NA	6433	6434	0.000196214	5321	5322
ISFIFKYN	ATCTCTTTTATTTTCAAATACAAT	Pool 13	1188	1189	0.000128687	1108	1109	5.90068e-05	1366	1367	2.2286e-05	936	937	1.5167e-05	NA	NA	NA	NA	NA	NA	NA	NA	NA	NA	NA	NA	NA	NA	NA	2044	2045	0.00011242	2622	2623	0.000145388	NA	NA	NA	NA	NA	NA	NA	NA	NA	799	800	2.43971e-05	7589	7590
ISFIVLMI	ATAAGTTTTATCGTCCTCATGATA	Pool 13	13968	13969	0.00151189	280	281	1.49512e-05	52	53	8.64053e-07	350	351	5.68154e-06	NA	NA	NA	NA	NA	NA	NA	NA	NA	NA	NA	NA	NA	NA	NA	3180	3181	0.00017487	1990	1991	0.000110357	NA	NA	NA	NA	NA	NA	NA	NA	NA	602	603	1.83893e-05	112	113
ISFLGART	ATATCGTTCCTAGGAGCCCGAACC	Pool 13	4432	4433	0.00047979	1234	1235	6.57109e-05	42	43	7.01024e-07	270	271	4.3866e-06	NA	NA	NA	NA	NA	NA	NA	NA	NA	NA	NA	NA	NA	NA	NA	4502	4503	0.000247545	6718	6719	0.00037242	NA	NA	NA	NA	NA	NA	NA	NA	NA	111	112	3.4156e-06	274	275
ISFLGCIM	ATAAGTTTTCTAGGTTGCATTATG	Pool 13	1203	1204	0.000130311	238	239	1.27165e-05	130	131	2.13568e-06	1310	1311	2.12208e-05	NA	NA	NA	NA	NA	NA	NA	NA	NA	NA	NA	NA	NA	NA	NA	2292	2293	0.000126054	2276	2277	0.000126209	NA	NA	NA	NA	NA	NA	NA	NA	NA	101	102	3.11063e-06	759	760
ISFLILPM	ATTAGTTTTCTTATACTTCCAATG	Pool 13	6602	6603	0.000714652	10500	10501	0.000558729	1314	1315	2.14383e-05	5300	5301	8.58058e-05	NA	NA	NA	NA	NA	NA	NA	NA	NA	NA	NA	NA	NA	NA	NA	6774	6775	0.000372444	5618	5619	0.00031145	NA	NA	NA	NA	NA	NA	NA	NA	NA	27991	27992	0.000853655	2226	2227
ISFLLRSC	ATCTCCTTTCTGCTCCGATCGTGT	Pool 13	772	773	8.36629e-05	220	221	1.17588e-05	8	9	1.46726e-07	278	279	4.5161e-06	NA	NA	NA	NA	NA	NA	NA	NA	NA	NA	NA	NA	NA	NA	NA	5258	5259	0.000289105	1250	1251	6.93404e-05	NA	NA	NA	NA	NA	NA	NA	NA	NA	3	4	1.21986e-07	98	99
ISFLNSFC	ATTTCCTTCTTAAATTCATTTTGC	Pool 13	3099	3100	0.000335518	4820	4821	0.000256512	2320	2321	3.7839e-05	5918	5919	9.58092e-05	NA	NA	NA	NA	NA	NA	NA	NA	NA	NA	NA	NA	NA	NA	NA	6074	6075	0.000333963	10360	10361	0.000574289	NA	NA	NA	NA	NA	NA	NA	NA	NA	832	833	2.54035e-05	3256	3257
ISFQGCVV	ATCTCGTTTCAGGGATGTGTTGTG	Pool 13	341	342	3.70152e-05	146	147	7.82146e-06	58	59	9.6187e-07	920	921	1.4908e-05	NA	NA	NA	NA	NA	NA	NA	NA	NA	NA	NA	NA	NA	NA	NA	588	589	3.23793e-05	506	507	2.8102e-05	NA	NA	NA	NA	NA	NA	NA	NA	NA	10	11	3.3546e-07	234	235
ISFRGLFI	ATCTCTTTTCGAGGGCTGTTTATT	Pool 13	893	894	9.67589e-05	2914	2915	0.000155099	188	189	3.08124e-06	46	47	7.60776e-07	NA	NA	NA	NA	NA	NA	NA	NA	NA	NA	NA	NA	NA	NA	NA	1892	1893	0.000104064	7158	7159	0.000396809	NA	NA	NA	NA	NA	NA	NA	NA	NA	475	476	1.45163e-05	876	877
ISFRRVAC	ATATCTTTCCGGCGAGTGGCATGT	Pool 13	245	246	2.66249e-05	122	123	6.54448e-06	NA	1	1.63029e-08	48	49	7.9315e-07	NA	NA	NA	NA	NA	NA	NA	NA	NA	NA	NA	NA	NA	NA	NA	552	553	3.04002e-05	680	681	3.77464e-05	NA	NA	NA	NA	NA	NA	NA	NA	NA	566	567	1.72915e-05	NA	1
ISFRSCAA	ATCAGTTTCCGCTCGTGTGCGGCA	Pool 13	15	16	1.7317e-06	NA	1	5.32072e-08	4	5	8.15144e-08	NA	1	1.61867e-08	NA	NA	NA	NA	NA	NA	NA	NA	NA	NA	NA	NA	NA	NA	NA	42	43	2.36385e-06	NA	1	5.5428e-08	NA	NA	NA	NA	NA	NA	NA	NA	NA	NA	1	3.04964e-08	NA	1
ISFSETAL	ATCAGCTTTTCCGAGACGGCGCTA	Pool 13	298	299	3.23612e-05	58	59	3.13922e-06	50	51	8.31447e-07	52	53	8.57897e-07	NA	NA	NA	NA	NA	NA	NA	NA	NA	NA	NA	NA	NA	NA	NA	342	343	1.88558e-05	478	479	2.655e-05	NA	NA	NA	NA	NA	NA	NA	NA	NA	4	5	1.52482e-07	31	32
ISFSILGL	ATATCCTTTAGCATACTAGGATTG	Pool 13	10873	10874	0.00117691	2442	2443	0.000129985	2700	2701	4.40341e-05	818	819	1.32569e-05	NA	NA	NA	NA	NA	NA	NA	NA	NA	NA	NA	NA	NA	NA	NA	10186	10187	0.000560013	13692	13693	0.000758975	NA	NA	NA	NA	NA	NA	NA	NA	NA	400	401	1.22291e-05	1267	1268
ISFSRILA	ATATCCTTCTCACGTATCCTCGCC	Pool 13	1276	1277	0.000138212	1202	1203	6.40083e-05	62	63	1.02708e-06	186	187	3.02692e-06	NA	NA	NA	NA	NA	NA	NA	NA	NA	NA	NA	NA	NA	NA	NA	2624	2625	0.000144305	1720	1721	9.53915e-05	NA	NA	NA	NA	NA	NA	NA	NA	NA	36	37	1.12837e-06	62	63
ISFSSGCL	ATATCGTTCAGTTCTGGATGTCTA	Pool 13	3521	3522	0.000381191	7278	7279	0.000387295	14266	14267	0.000232593	18598	18599	0.000301057	NA	NA	NA	NA	NA	NA	NA	NA	NA	NA	NA	NA	NA	NA	NA	5894	5895	0.000324068	4790	4791	0.000265555	NA	NA	NA	NA	NA	NA	NA	NA	NA	14199	14200	0.000433049	4443	4444
ISFTPTVL	ATATCATTCACCCCAACAGTCTTA	Pool 13	98	99	1.07149e-05	12	13	6.91693e-07	28	29	4.72784e-07	6	7	1.13307e-07	NA	NA	NA	NA	NA	NA	NA	NA	NA	NA	NA	NA	NA	NA	NA	118	119	6.54182e-06	178	179	9.9216e-06	NA	NA	NA	NA	NA	NA	NA	NA	NA	NA	1	3.04964e-08	NA	1
ISFVGCSI	ATATCTTTCGTTGGGTGCTCGATA	Pool 13	187	188	2.03475e-05	NA	1	5.32072e-08	6	7	1.1412e-07	NA	1	1.61867e-08	NA	NA	NA	NA	NA	NA	NA	NA	NA	NA	NA	NA	NA	NA	NA	458	459	2.52327e-05	306	307	1.70164e-05	NA	NA	NA	NA	NA	NA	NA	NA	NA	77	78	2.37872e-06	12	13
ISFVLLAA	ATTAGTTTCGTGCTTCTAGCTGCG	Pool 13	984	985	0.000106608	878	879	4.67691e-05	266	267	4.35287e-06	690	691	1.1185e-05	NA	NA	NA	NA	NA	NA	NA	NA	NA	NA	NA	NA	NA	NA	NA	1612	1613	8.86719e-05	1606	1607	8.90727e-05	NA	NA	NA	NA	NA	NA	NA	NA	NA	129	130	3.96453e-06	1206	1207
ISFYNALL	ATTAGCTTCTACAATGCCTTGTTA	Pool 13	1540	1541	0.000166785	986	987	5.25155e-05	550	551	8.98289e-06	1160	1161	1.87928e-05	NA	NA	NA	NA	NA	NA	NA	NA	NA	NA	NA	NA	NA	NA	NA	4498	4499	0.000247325	2198	2199	0.000121886	NA	NA	NA	NA	NA	NA	NA	NA	NA	666	667	2.03411e-05	1057	1058
ISGFEAQL	ATTTCAGGTTTCGAGGCCCAATTA	Pool 13	1619	1620	0.000175335	1272	1273	6.77328e-05	188	189	3.08124e-06	660	661	1.06994e-05	NA	NA	NA	NA	NA	NA	NA	NA	NA	NA	NA	NA	NA	NA	NA	3466	3467	0.000190592	3716	3717	0.000206026	NA	NA	NA	NA	NA	NA	NA	NA	NA	304	305	9.3014e-06	776	777
ISGYSLRL	ATTTCCGGCTATAGCCTTCGTCTC	Pool 13	2674	2675	0.000289519	1186	1187	6.31569e-05	236	237	3.86378e-06	1390	1391	2.25157e-05	NA	NA	NA	NA	NA	NA	NA	NA	NA	NA	NA	NA	NA	NA	NA	7220	7221	0.000396962	8724	8725	0.000483609	NA	NA	NA	NA	NA	NA	NA	NA	NA	66	67	2.04326e-06	156	157
ISHFYSVS	ATTTCACATTTCTATAGCGTATCT	Pool 13	2345	2346	0.000253911	948	949	5.04936e-05	490	491	8.00471e-06	558	559	9.04838e-06	NA	NA	NA	NA	NA	NA	NA	NA	NA	NA	NA	NA	NA	NA	NA	4776	4777	0.000262607	7372	7373	0.00040867	NA	NA	NA	NA	NA	NA	NA	NA	NA	603	604	1.84198e-05	312	313
ISHMLLPF	ATATCTCATATGCTGTTACCCTTC	Pool 13	426	427	4.62148e-05	422	423	2.25066e-05	8330	8331	0.000135819	1858	1859	3.00911e-05	NA	NA	NA	NA	NA	NA	NA	NA	NA	NA	NA	NA	NA	NA	NA	1536	1537	8.4494e-05	820	821	4.55064e-05	NA	NA	NA	NA	NA	NA	NA	NA	NA	71	72	2.19574e-06	377	378
ISHPRRLL	ATTTCTCACCCGCGCCGACTCCTG	Pool 13	141	142	1.53689e-05	204	205	1.09075e-05	18	19	3.09755e-07	4	5	8.09336e-08	NA	NA	NA	NA	NA	NA	NA	NA	NA	NA	NA	NA	NA	NA	NA	580	581	3.19395e-05	232	233	1.29147e-05	NA	NA	NA	NA	NA	NA	NA	NA	NA	NA	1	3.04964e-08	54	55
ISHQHQKL	ATTTCGCATCAACATCAGAAATTA	Pool 13	1679	1680	0.000181829	2126	2127	0.000113172	1440	1441	2.34925e-05	1642	1643	2.65948e-05	NA	NA	NA	NA	NA	NA	NA	NA	NA	NA	NA	NA	NA	NA	NA	6144	6145	0.000337811	6322	6323	0.000350471	NA	NA	NA	NA	NA	NA	NA	NA	NA	869	870	2.65319e-05	899	900
ISHYFCDL	ATCTCGCACTACTTCTGTGACTTA	Pool 13	280	281	3.0413e-05	4	5	2.66036e-07	72	73	1.19011e-06	78	79	1.27875e-06	NA	NA	NA	NA	NA	NA	NA	NA	NA	NA	NA	NA	NA	NA	NA	436	437	2.40233e-05	478	479	2.655e-05	NA	NA	NA	NA	NA	NA	NA	NA	NA	115	116	3.53758e-06	121	122
ISIETAQL	ATCTCGATAGAAACCGCCCAGTTA	Pool 13	729	730	7.9009e-05	1520	1521	8.09281e-05	382	383	6.244e-06	200	201	3.25353e-06	NA	NA	NA	NA	NA	NA	NA	NA	NA	NA	NA	NA	NA	NA	NA	1836	1837	0.000100986	8464	8465	0.000469198	NA	NA	NA	NA	NA	NA	NA	NA	NA	202	203	6.19077e-06	475	476
ISIFHGII	ATCAGCATTTTCCACGGTATCATA	Pool 13	545	546	5.90944e-05	124	125	6.6509e-06	24	25	4.07572e-07	56	57	9.22643e-07	NA	NA	NA	NA	NA	NA	NA	NA	NA	NA	NA	NA	NA	NA	NA	1176	1177	6.47036e-05	1820	1821	0.000100934	NA	NA	NA	NA	NA	NA	NA	NA	NA	344	345	1.05213e-05	41	42
ISIFTAIL	ATTTCTATCTTCACAGCCATACTC	Pool 13	2606	2607	0.000282159	412	413	2.19746e-05	44	45	7.3363e-07	316	317	5.13119e-06	NA	NA	NA	NA	NA	NA	NA	NA	NA	NA	NA	NA	NA	NA	NA	2774	2775	0.000152551	3728	3729	0.000206691	NA	NA	NA	NA	NA	NA	NA	NA	NA	362	363	1.10702e-05	392	393
ISIFVAIF	ATCTCTATTTTCGTTGCCATCTTC	Pool 13	1826	1827	0.000197739	590	591	3.14454e-05	384	385	6.27661e-06	3096	3097	5.01303e-05	NA	NA	NA	NA	NA	NA	NA	NA	NA	NA	NA	NA	NA	NA	NA	1936	1937	0.000106483	1624	1625	9.00704e-05	NA	NA	NA	NA	NA	NA	NA	NA	NA	66	67	2.04326e-06	96	97
ISILNSML	ATTTCGATACTGAACAGCATGCTC	Pool 13	NA	1	1.08231e-07	NA	1	5.32072e-08	NA	1	1.63029e-08	NA	1	1.61867e-08	NA	NA	NA	NA	NA	NA	NA	NA	NA	NA	NA	NA	NA	NA	NA	NA	1	5.49733e-08	NA	1	5.5428e-08	NA	NA	NA	NA	NA	NA	NA	NA	NA	NA	1	3.04964e-08	NA	1
ISILWIPI	ATTTCAATATTATGGATACCGATT	Pool 13	390	391	4.23185e-05	718	719	3.8256e-05	38	39	6.35812e-07	30	31	5.01789e-07	NA	NA	NA	NA	NA	NA	NA	NA	NA	NA	NA	NA	NA	NA	NA	914	915	5.03006e-05	1364	1365	7.56592e-05	NA	NA	NA	NA	NA	NA	NA	NA	NA	27	28	8.53899e-07	360	361
ISIMYREV	ATATCTATCATGTATAGAGAGGTA	Pool 13	985	986	0.000106716	460	461	2.45285e-05	1256	1257	2.04927e-05	940	941	1.52317e-05	NA	NA	NA	NA	NA	NA	NA	NA	NA	NA	NA	NA	NA	NA	NA	3364	3365	0.000184985	3926	3927	0.000217666	NA	NA	NA	NA	NA	NA	NA	NA	NA	9357	9358	0.000285385	364	365
ISIPFFAI	ATTTCAATTCCGTTCTTCGCTATC	Pool 13	4312	4313	0.000466802	3254	3255	0.000173189	646	647	1.0548e-05	2576	2577	4.17132e-05	NA	NA	NA	NA	NA	NA	NA	NA	NA	NA	NA	NA	NA	NA	NA	9746	9747	0.000535825	7018	7019	0.000389049	NA	NA	NA	NA	NA	NA	NA	NA	NA	2143	2144	6.53843e-05	2447	2448
ISISYGSC	ATCTCCATCTCCTACGGGTCCTGC	Pool 13	1480	1481	0.000160291	3786	3787	0.000201496	424	425	6.92872e-06	1378	1379	2.23215e-05	NA	NA	NA	NA	NA	NA	NA	NA	NA	NA	NA	NA	NA	NA	NA	7790	7791	0.000428297	3266	3267	0.000181083	NA	NA	NA	NA	NA	NA	NA	NA	NA	683	684	2.08595e-05	3776	3777
ISITCLYV	ATTTCAATAACTTGCCTCTACGTT	Pool 13	489	490	5.30334e-05	150	151	8.03429e-06	50	51	8.31447e-07	164	165	2.67081e-06	NA	NA	NA	NA	NA	NA	NA	NA	NA	NA	NA	NA	NA	NA	NA	778	779	4.28242e-05	2226	2227	0.000123438	NA	NA	NA	NA	NA	NA	NA	NA	NA	45	46	1.40283e-06	6	7
ISITFFRL	ATCTCCATCACGTTCTTTCGTTTG	Pool 13	903	904	9.78412e-05	104	105	5.58676e-06	38	39	6.35812e-07	126	127	2.05571e-06	NA	NA	NA	NA	NA	NA	NA	NA	NA	NA	NA	NA	NA	NA	NA	1686	1687	9.274e-05	752	753	4.17372e-05	NA	NA	NA	NA	NA	NA	NA	NA	NA	240	241	7.34963e-06	241	242
ISITLAVL	ATCTCTATCACGCTGGCCGTATTG	Pool 13	294	295	3.19283e-05	252	253	1.34614e-05	28	29	4.72784e-07	78	79	1.27875e-06	NA	NA	NA	NA	NA	NA	NA	NA	NA	NA	NA	NA	NA	NA	NA	938	939	5.16199e-05	1198	1199	6.64581e-05	NA	NA	NA	NA	NA	NA	NA	NA	NA	158	159	4.84893e-06	114	115
ISIVELAL	ATAAGCATAGTCGAATTGGCATTA	Pool 13	839	840	9.09144e-05	246	247	1.31422e-05	130	131	2.13568e-06	8	9	1.45681e-07	NA	NA	NA	NA	NA	NA	NA	NA	NA	NA	NA	NA	NA	NA	NA	2672	2673	0.000146944	2062	2063	0.000114348	NA	NA	NA	NA	NA	NA	NA	NA	NA	115	116	3.53758e-06	99	100
ISKCLSSL	ATCTCGAAGTGCTTAAGCAGCCTG	Pool 13	15	16	1.7317e-06	2	3	1.59622e-07	NA	1	1.63029e-08	50	51	8.25523e-07	NA	NA	NA	NA	NA	NA	NA	NA	NA	NA	NA	NA	NA	NA	NA	56	57	3.13348e-06	194	195	1.08085e-05	NA	NA	NA	NA	NA	NA	NA	NA	NA	NA	1	3.04964e-08	58	59
ISKRISFL	ATAAGCAAAAGGATTTCCTTCTTG	Pool 13	2109	2110	0.000228368	818	819	4.35767e-05	416	417	6.7983e-06	912	913	1.47785e-05	NA	NA	NA	NA	NA	NA	NA	NA	NA	NA	NA	NA	NA	NA	NA	4066	4067	0.000223576	3312	3313	0.000183633	NA	NA	NA	NA	NA	NA	NA	NA	NA	124	125	3.81205e-06	519	520
ISLEMAAV	ATCTCACTCGAGATGGCTGCAGTT	Pool 13	1031	1032	0.000111695	628	629	3.34673e-05	5174	5175	8.43674e-05	476	477	7.72107e-06	NA	NA	NA	NA	NA	NA	NA	NA	NA	NA	NA	NA	NA	NA	NA	2348	2349	0.000129132	3132	3133	0.000173656	NA	NA	NA	NA	NA	NA	NA	NA	NA	790	791	2.41226e-05	138	139
ISLFLSTF	ATCTCGCTCTTTCTGAGCACTTTT	Pool 13	611	612	6.62377e-05	108	109	5.79958e-06	22	23	3.74966e-07	38	39	6.31282e-07	NA	NA	NA	NA	NA	NA	NA	NA	NA	NA	NA	NA	NA	NA	NA	1900	1901	0.000104504	742	743	4.1183e-05	NA	NA	NA	NA	NA	NA	NA	NA	NA	20	21	6.40424e-07	20	21
ISLFTVRL	ATCTCACTGTTCACTGTACGTTTA	Pool 13	805	806	8.72346e-05	36	37	1.96867e-06	84	85	1.38574e-06	454	455	7.36496e-06	NA	NA	NA	NA	NA	NA	NA	NA	NA	NA	NA	NA	NA	NA	NA	1018	1019	5.60178e-05	5156	5157	0.000285842	NA	NA	NA	NA	NA	NA	NA	NA	NA	5	6	1.82978e-07	42	43
ISLFYGLL	ATCTCCCTGTTTTATGGGCTTCTA	Pool 13	663	664	7.18657e-05	48	49	2.60715e-06	58	59	9.6187e-07	58	59	9.55017e-07	NA	NA	NA	NA	NA	NA	NA	NA	NA	NA	NA	NA	NA	NA	NA	2390	2391	0.000131441	1048	1049	5.81439e-05	NA	NA	NA	NA	NA	NA	NA	NA	NA	6	7	2.13475e-07	151	152
ISLFYSAF	ATTTCGCTGTTCTACTCGGCATTT	Pool 13	670	671	7.26233e-05	466	467	2.48478e-05	40	41	6.68418e-07	24	25	4.04668e-07	NA	NA	NA	NA	NA	NA	NA	NA	NA	NA	NA	NA	NA	NA	NA	3670	3671	0.000201807	1402	1403	7.77654e-05	NA	NA	NA	NA	NA	NA	NA	NA	NA	81	82	2.5007e-06	61	62
ISLIFCLA	ATTAGTTTAATTTTCTGTCTAGCT	Pool 13	1085	1086	0.000117539	34	35	1.86225e-06	56	57	9.29264e-07	32	33	5.34162e-07	NA	NA	NA	NA	NA	NA	NA	NA	NA	NA	NA	NA	NA	NA	NA	788	789	4.33739e-05	2934	2935	0.000162681	NA	NA	NA	NA	NA	NA	NA	NA	NA	177	178	5.42836e-06	130	131
ISLILSDV	ATATCACTGATCTTATCAGATGTC	Pool 13	236	237	2.56509e-05	22	23	1.22377e-06	34	35	5.70601e-07	150	151	2.4442e-06	NA	NA	NA	NA	NA	NA	NA	NA	NA	NA	NA	NA	NA	NA	NA	590	591	3.24892e-05	1588	1589	8.8075e-05	NA	NA	NA	NA	NA	NA	NA	NA	NA	59	60	1.82978e-06	22	23
ISLISITL	ATTAGCTTGATATCTATAACTCTT	Pool 13	841	842	9.11309e-05	814	815	4.33639e-05	208	209	3.4073e-06	30	31	5.01789e-07	NA	NA	NA	NA	NA	NA	NA	NA	NA	NA	NA	NA	NA	NA	NA	1776	1777	9.76876e-05	1518	1519	8.41951e-05	NA	NA	NA	NA	NA	NA	NA	NA	NA	325	326	9.94182e-06	41	42
ISLKFKAM	ATTAGTTTGAAATTTAAGGCCATG	Pool 13	427	428	4.63231e-05	364	365	1.94206e-05	NA	1	1.63029e-08	52	53	8.57897e-07	NA	NA	NA	NA	NA	NA	NA	NA	NA	NA	NA	NA	NA	NA	NA	602	603	3.31489e-05	2852	2853	0.000158136	NA	NA	NA	NA	NA	NA	NA	NA	NA	NA	1	3.04964e-08	67	68
ISLKRVAV	ATATCTCTAAAGAGGGTAGCCGTA	Pool 13	76	77	8.33382e-06	42	43	2.28791e-06	6	7	1.1412e-07	8	9	1.45681e-07	NA	NA	NA	NA	NA	NA	NA	NA	NA	NA	NA	NA	NA	NA	NA	310	311	1.70967e-05	266	267	1.47993e-05	NA	NA	NA	NA	NA	NA	NA	NA	NA	2	3	9.14892e-08	7	8
ISLLKQNL	ATCTCCCTACTTAAGCAAAATCTC	Pool 13	2351	2352	0.00025456	268	269	1.43127e-05	48	49	7.98841e-07	202	203	3.28591e-06	NA	NA	NA	NA	NA	NA	NA	NA	NA	NA	NA	NA	NA	NA	NA	2130	2131	0.000117148	3030	3031	0.000168002	NA	NA	NA	NA	NA	NA	NA	NA	NA	6	7	2.13475e-07	237	238
ISLLLPQV	ATAAGCCTCCTTCTGCCGCAGGTG	Pool 13	38	39	4.22103e-06	NA	1	5.32072e-08	4	5	8.15144e-08	4	5	8.09336e-08	NA	NA	NA	NA	NA	NA	NA	NA	NA	NA	NA	NA	NA	NA	NA	20	21	1.15444e-06	NA	1	5.5428e-08	NA	NA	NA	NA	NA	NA	NA	NA	NA	NA	1	3.04964e-08	2	3
ISLLSSAV	ATTAGCCTGCTCTCCTCGGCCGTC	Pool 13	251	252	2.72743e-05	44	45	2.39432e-06	4	5	8.15144e-08	34	35	5.66535e-07	NA	NA	NA	NA	NA	NA	NA	NA	NA	NA	NA	NA	NA	NA	NA	590	591	3.24892e-05	742	743	4.1183e-05	NA	NA	NA	NA	NA	NA	NA	NA	NA	5	6	1.82978e-07	18	19
ISLLWSCI	ATATCTCTCCTCTGGAGTTGCATT	Pool 13	1211	1212	0.000131177	1626	1627	8.65681e-05	188	189	3.08124e-06	2290	2291	3.70838e-05	NA	NA	NA	NA	NA	NA	NA	NA	NA	NA	NA	NA	NA	NA	NA	2338	2339	0.000128583	2752	2753	0.000152593	NA	NA	NA	NA	NA	NA	NA	NA	NA	441	442	1.34794e-05	268	269
ISLMSCFL	ATATCCCTCATGAGTTGCTTCTTG	Pool 13	45	46	4.97865e-06	NA	1	5.32072e-08	NA	1	1.63029e-08	4	5	8.09336e-08	NA	NA	NA	NA	NA	NA	NA	NA	NA	NA	NA	NA	NA	NA	NA	66	67	3.68321e-06	132	133	7.37192e-06	NA	NA	NA	NA	NA	NA	NA	NA	NA	2	3	9.14892e-08	NA	1
ISLPFFIM	ATTTCGCTTCCCTTCTTCATTATG	Pool 13	1642	1643	0.000177824	110	111	5.906e-06	192	193	3.14646e-06	5554	5555	8.99173e-05	NA	NA	NA	NA	NA	NA	NA	NA	NA	NA	NA	NA	NA	NA	NA	3750	3751	0.000206205	2756	2757	0.000152815	NA	NA	NA	NA	NA	NA	NA	NA	NA	453	454	1.38454e-05	162	163
ISLPHFLM	ATTTCCCTTCCACACTTTCTAATG	Pool 13	1071	1072	0.000116024	728	729	3.8788e-05	470	471	7.67866e-06	1916	1917	3.103e-05	NA	NA	NA	NA	NA	NA	NA	NA	NA	NA	NA	NA	NA	NA	NA	4098	4099	0.000225336	3878	3879	0.000215005	NA	NA	NA	NA	NA	NA	NA	NA	NA	5155	5156	0.000157239	799	800
ISLSFLDL	ATCAGTTTGTCCTTCCTCGATTTA	Pool 13	1525	1526	0.000165161	662	663	3.52764e-05	380	381	6.2114e-06	612	613	9.92246e-06	NA	NA	NA	NA	NA	NA	NA	NA	NA	NA	NA	NA	NA	NA	NA	8000	8001	0.000439841	3768	3769	0.000208908	NA	NA	NA	NA	NA	NA	NA	NA	NA	892	893	2.72333e-05	1112	1113
ISLSHQNL	ATAAGCCTGAGCCATCAAAACTTG	Pool 13	550	551	5.96355e-05	284	285	1.5164e-05	254	255	4.15723e-06	312	313	5.06645e-06	NA	NA	NA	NA	NA	NA	NA	NA	NA	NA	NA	NA	NA	NA	NA	1210	1211	6.65727e-05	882	883	4.89429e-05	NA	NA	NA	NA	NA	NA	NA	NA	NA	78	79	2.40921e-06	154	155
ISLSVKKL	ATCTCATTATCTGTCAAGAAATTG	Pool 13	4546	4547	0.000492128	4438	4439	0.000236187	82	83	1.35314e-06	720	721	1.16706e-05	NA	NA	NA	NA	NA	NA	NA	NA	NA	NA	NA	NA	NA	NA	NA	2918	2919	0.000160467	3046	3047	0.000168889	NA	NA	NA	NA	NA	NA	NA	NA	NA	145	146	4.45247e-06	177	178
ISLTLCFL	ATAAGCTTAACACTTTGCTTCCTT	Pool 13	7291	7292	0.000789224	1046	1047	5.57079e-05	980	981	1.59931e-05	1534	1535	2.48466e-05	NA	NA	NA	NA	NA	NA	NA	NA	NA	NA	NA	NA	NA	NA	NA	5620	5621	0.000309005	5758	5759	0.00031921	NA	NA	NA	NA	NA	NA	NA	NA	NA	118	119	3.62907e-06	3469	3470
ISLVHSMI	ATTAGTCTGGTACACTCCATGATA	Pool 13	13275	13276	0.00143688	847832	847833	0.0451108	138260	138261	0.00225405	266014	266015	0.00430591	NA	NA	NA	NA	NA	NA	NA	NA	NA	NA	NA	NA	NA	NA	NA	15640	15641	0.000859837	28336	28337	0.00157066	NA	NA	NA	NA	NA	NA	NA	NA	NA	225234	225235	0.00686885	163411	163412
ISLVISTL	ATTAGTCTCGTTATCAGTACACTT	Pool 13	260	261	2.82484e-05	400	401	2.13361e-05	48	49	7.98841e-07	24	25	4.04668e-07	NA	NA	NA	NA	NA	NA	NA	NA	NA	NA	NA	NA	NA	NA	NA	430	431	2.36935e-05	260	261	1.44667e-05	NA	NA	NA	NA	NA	NA	NA	NA	NA	68	69	2.10425e-06	65	66
ISLVLAPT	ATAAGTCTCGTGCTCGCACCTACT	Pool 13	1335	1336	0.000144597	374	375	1.99527e-05	60	61	9.94476e-07	370	371	6.00528e-06	NA	NA	NA	NA	NA	NA	NA	NA	NA	NA	NA	NA	NA	NA	NA	2204	2205	0.000121216	7994	7995	0.000443146	NA	NA	NA	NA	NA	NA	NA	NA	NA	275	276	8.417e-06	1337	1338
ISLYFPTL	ATATCCCTTTATTTCCCAACGCTG	Pool 13	997	998	0.000108015	560	561	2.98492e-05	1642	1643	2.67856e-05	962	963	1.55878e-05	NA	NA	NA	NA	NA	NA	NA	NA	NA	NA	NA	NA	NA	NA	NA	4444	4445	0.000244356	2594	2595	0.000143836	NA	NA	NA	NA	NA	NA	NA	NA	NA	1750	1751	5.33992e-05	2208	2209
ISLYKAQI	ATATCACTATACAAAGCTCAAATC	Pool 13	NA	1	1.08231e-07	NA	1	5.32072e-08	NA	1	1.63029e-08	NA	1	1.61867e-08	NA	NA	NA	NA	NA	NA	NA	NA	NA	NA	NA	NA	NA	NA	NA	NA	1	5.49733e-08	NA	1	5.5428e-08	NA	NA	NA	NA	NA	NA	NA	NA	NA	NA	1	3.04964e-08	NA	1
ISLYNTSM	ATCAGCCTGTACAACACTTCCATG	Pool 13	3252	3253	0.000352077	1970	1971	0.000104871	1186	1187	1.93515e-05	3746	3747	6.06517e-05	NA	NA	NA	NA	NA	NA	NA	NA	NA	NA	NA	NA	NA	NA	NA	8674	8675	0.000476893	8464	8465	0.000469198	NA	NA	NA	NA	NA	NA	NA	NA	NA	2337	2338	7.13006e-05	6134	6135
ISMAASTL	ATTAGTATGGCAGCATCGACACTC	Pool 13	107	108	1.1689e-05	24	25	1.33018e-06	NA	1	1.63029e-08	28	29	4.69415e-07	NA	NA	NA	NA	NA	NA	NA	NA	NA	NA	NA	NA	NA	NA	NA	1668	1669	9.17504e-05	196	197	1.09193e-05	NA	NA	NA	NA	NA	NA	NA	NA	NA	47	48	1.46383e-06	76	77
ISMASSQL	ATTTCTATGGCCTCATCTCAGCTG	Pool 13	14	15	1.62347e-06	NA	1	5.32072e-08	NA	1	1.63029e-08	NA	1	1.61867e-08	NA	NA	NA	NA	NA	NA	NA	NA	NA	NA	NA	NA	NA	NA	NA	20	21	1.15444e-06	4	5	2.7714e-07	NA	NA	NA	NA	NA	NA	NA	NA	NA	NA	1	3.04964e-08	2	3
ISMENVPM	ATCAGCATGGAGAACGTACCTATG	Pool 13	65	66	7.14328e-06	18	19	1.01094e-06	8	9	1.46726e-07	2	3	4.85602e-08	NA	NA	NA	NA	NA	NA	NA	NA	NA	NA	NA	NA	NA	NA	NA	618	619	3.40285e-05	454	455	2.52197e-05	NA	NA	NA	NA	NA	NA	NA	NA	NA	NA	1	3.04964e-08	NA	1
ISMFFLNS	ATCAGCATGTTCTTCCTAAACAGC	Pool 13	54	55	5.95273e-06	22	23	1.22377e-06	22	23	3.74966e-07	8	9	1.45681e-07	NA	NA	NA	NA	NA	NA	NA	NA	NA	NA	NA	NA	NA	NA	NA	24	25	1.37433e-06	38	39	2.16169e-06	NA	NA	NA	NA	NA	NA	NA	NA	NA	2	3	9.14892e-08	6	7
ISMGLFSI	ATTTCGATGGGGCTCTTCTCAATA	Pool 13	41	42	4.54572e-06	34	35	1.86225e-06	NA	1	1.63029e-08	28	29	4.69415e-07	NA	NA	NA	NA	NA	NA	NA	NA	NA	NA	NA	NA	NA	NA	NA	72	73	4.01305e-06	90	91	5.04394e-06	NA	NA	NA	NA	NA	NA	NA	NA	NA	2	3	9.14892e-08	NA	1
ISMIERHL	ATCAGCATGATAGAGCGCCATCTC	Pool 13	1606	1607	0.000173928	1486	1487	7.91191e-05	458	459	7.48302e-06	2	3	4.85602e-08	NA	NA	NA	NA	NA	NA	NA	NA	NA	NA	NA	NA	NA	NA	NA	4716	4717	0.000259309	3218	3219	0.000178423	NA	NA	NA	NA	NA	NA	NA	NA	NA	1375	1376	4.1963e-05	1144	1145
ISMTVWGL	ATAAGCATGACTGTCTGGGGTCTC	Pool 13	226	227	2.45685e-05	344	345	1.83565e-05	1290	1291	2.1047e-05	892	893	1.44547e-05	NA	NA	NA	NA	NA	NA	NA	NA	NA	NA	NA	NA	NA	NA	NA	406	407	2.23741e-05	144	145	8.03705e-06	NA	NA	NA	NA	NA	NA	NA	NA	NA	12565	12566	0.000383218	577	578
ISMVIGRL	ATAAGCATGGTGATCGGACGACTC	Pool 13	66	67	7.25151e-06	NA	1	5.32072e-08	NA	1	1.63029e-08	NA	1	1.61867e-08	NA	NA	NA	NA	NA	NA	NA	NA	NA	NA	NA	NA	NA	NA	NA	406	407	2.23741e-05	94	95	5.26566e-06	NA	NA	NA	NA	NA	NA	NA	NA	NA	18	19	5.79431e-07	2	3
ISNQYFSF	ATTTCTAACCAATACTTCTCTTTT	Pool 13	1246	1247	0.000134965	958	959	5.10257e-05	286	287	4.67893e-06	2560	2561	4.14542e-05	NA	NA	NA	NA	NA	NA	NA	NA	NA	NA	NA	NA	NA	NA	NA	3852	3853	0.000211812	3566	3567	0.000197712	NA	NA	NA	NA	NA	NA	NA	NA	NA	773	774	2.36042e-05	1089	1090
ISPMLNPL	ATTTCCCCTATGTTAAATCCACTT	Pool 13	2327	2328	0.000251963	810	811	4.3151e-05	530	531	8.65683e-06	272	273	4.41898e-06	NA	NA	NA	NA	NA	NA	NA	NA	NA	NA	NA	NA	NA	NA	NA	7806	7807	0.000429177	8100	8101	0.000449022	NA	NA	NA	NA	NA	NA	NA	NA	NA	3932	3933	0.000119942	734	735
ISPNGMSL	ATATCTCCAAATGGCATGAGTCTG	Pool 13	144	145	1.56936e-05	48	49	2.60715e-06	2	3	4.89086e-08	NA	1	1.61867e-08	NA	NA	NA	NA	NA	NA	NA	NA	NA	NA	NA	NA	NA	NA	NA	390	391	2.14946e-05	88	89	4.93309e-06	NA	NA	NA	NA	NA	NA	NA	NA	NA	3	4	1.21986e-07	20	21
ISPPAPFL	ATCAGTCCTCCAGCGCCTTTTCTC	Pool 13	596	597	6.46142e-05	506	507	2.6976e-05	528	529	8.62422e-06	1934	1935	3.13213e-05	NA	NA	NA	NA	NA	NA	NA	NA	NA	NA	NA	NA	NA	NA	NA	1662	1663	9.14206e-05	4052	4053	0.000224649	NA	NA	NA	NA	NA	NA	NA	NA	NA	137	138	4.2085e-06	21	22
ISPQYQPV	ATCAGCCCTCAATACCAGCCAGTC	Pool 13	140	141	1.52606e-05	54	55	2.9264e-06	188	189	3.08124e-06	NA	1	1.61867e-08	NA	NA	NA	NA	NA	NA	NA	NA	NA	NA	NA	NA	NA	NA	NA	340	341	1.87459e-05	630	631	3.4975e-05	NA	NA	NA	NA	NA	NA	NA	NA	NA	NA	1	3.04964e-08	46	47
ISPVPINL	ATCAGTCCAGTCCCCATCAACCTA	Pool 13	NA	1	1.08231e-07	NA	1	5.32072e-08	4	5	8.15144e-08	8	9	1.45681e-07	NA	NA	NA	NA	NA	NA	NA	NA	NA	NA	NA	NA	NA	NA	NA	2	3	1.6492e-07	NA	1	5.5428e-08	NA	NA	NA	NA	NA	NA	NA	NA	NA	NA	1	3.04964e-08	1	2
ISPWWYFA	ATCAGCCCATGGTGGTACTTCGCT	Pool 13	271	272	2.9439e-05	52	53	2.81998e-06	NA	1	1.63029e-08	48	49	7.9315e-07	NA	NA	NA	NA	NA	NA	NA	NA	NA	NA	NA	NA	NA	NA	NA	782	783	4.30441e-05	1080	1081	5.99176e-05	NA	NA	NA	NA	NA	NA	NA	NA	NA	NA	1	3.04964e-08	73	74
ISQIILLL	ATCTCGCAAATTATCTTGCTACTC	Pool 13	540	541	5.85532e-05	1352	1353	7.19893e-05	164	165	2.68998e-06	2218	2219	3.59183e-05	NA	NA	NA	NA	NA	NA	NA	NA	NA	NA	NA	NA	NA	NA	NA	1710	1711	9.40593e-05	1708	1709	9.47264e-05	NA	NA	NA	NA	NA	NA	NA	NA	NA	190	191	5.82481e-06	190	191
ISQKFGFM	ATTTCTCAGAAATTCGGTTTTATG	Pool 13	1679	1680	0.000181829	2474	2475	0.000131688	2078	2079	3.38937e-05	814	815	1.31922e-05	NA	NA	NA	NA	NA	NA	NA	NA	NA	NA	NA	NA	NA	NA	NA	7676	7677	0.00042203	4366	4367	0.000242054	NA	NA	NA	NA	NA	NA	NA	NA	NA	380	381	1.16191e-05	658	659
ISQLKMFL	ATTTCTCAACTTAAAATGTTTCTA	Pool 13	1691	1692	0.000183128	878	879	4.67691e-05	186	187	3.04864e-06	962	963	1.55878e-05	NA	NA	NA	NA	NA	NA	NA	NA	NA	NA	NA	NA	NA	NA	NA	2948	2949	0.000162116	3416	3417	0.000189397	NA	NA	NA	NA	NA	NA	NA	NA	NA	199	200	6.09928e-06	478	479
ISQLMFFM	ATCTCGCAGCTCATGTTCTTTATG	Pool 13	719	720	7.79267e-05	16	17	9.04522e-07	NA	1	1.63029e-08	660	661	1.06994e-05	NA	NA	NA	NA	NA	NA	NA	NA	NA	NA	NA	NA	NA	NA	NA	1922	1923	0.000105714	1610	1611	8.92944e-05	NA	NA	NA	NA	NA	NA	NA	NA	NA	39	40	1.21986e-06	222	223
ISQLVPRL	ATCTCTCAGTTAGTACCCCGACTC	Pool 13	263	264	2.85731e-05	10	11	5.85279e-07	192	193	3.14646e-06	362	363	5.87578e-06	NA	NA	NA	NA	NA	NA	NA	NA	NA	NA	NA	NA	NA	NA	NA	546	547	3.00704e-05	614	615	3.40882e-05	NA	NA	NA	NA	NA	NA	NA	NA	NA	294	295	8.99644e-06	471	472
ISQMLTAM	ATTTCGCAAATGTTAACGGCAATG	Pool 13	722	723	7.82514e-05	700	701	3.72982e-05	210	211	3.43991e-06	474	475	7.6887e-06	NA	NA	NA	NA	NA	NA	NA	NA	NA	NA	NA	NA	NA	NA	NA	1492	1493	8.20751e-05	1164	1165	6.45736e-05	NA	NA	NA	NA	NA	NA	NA	NA	NA	41	42	1.28085e-06	194	195
ISQRYPDI	ATCTCTCAGCGCTATCCTGACATA	Pool 13	167533	167534	0.0181325	480320	480321	0.0255565	39934	39935	0.000651056	30776	30777	0.000498179	NA	NA	NA	NA	NA	NA	NA	NA	NA	NA	NA	NA	NA	NA	NA	25812	25813	0.00141903	17896	17897	0.000991994	NA	NA	NA	NA	NA	NA	NA	NA	NA	134903	134904	0.00411409	68665	68666
ISRFQSLI	ATCTCCCGCTTTCAGTCGCTCATA	Pool 13	229	230	2.48932e-05	134	135	7.18297e-06	52	53	8.64053e-07	12	13	2.10427e-07	NA	NA	NA	NA	NA	NA	NA	NA	NA	NA	NA	NA	NA	NA	NA	850	851	4.67823e-05	622	623	3.45316e-05	NA	NA	NA	NA	NA	NA	NA	NA	NA	95	96	2.92765e-06	17	18
ISRYTPQL	ATTTCGCGTTATACTCCGCAGCTT	Pool 13	1290	1291	0.000139727	676	677	3.60213e-05	354	355	5.78752e-06	206	207	3.35065e-06	NA	NA	NA	NA	NA	NA	NA	NA	NA	NA	NA	NA	NA	NA	NA	1242	1243	6.83318e-05	1040	1041	5.77005e-05	NA	NA	NA	NA	NA	NA	NA	NA	NA	131	132	4.02552e-06	118	119
ISSAHQRL	ATCTCCTCCGCTCATCAACGGTTG	Pool 13	146	147	1.591e-05	160	161	8.56636e-06	NA	1	1.63029e-08	NA	1	1.61867e-08	NA	NA	NA	NA	NA	NA	NA	NA	NA	NA	NA	NA	NA	NA	NA	520	521	2.86411e-05	598	599	3.32013e-05	NA	NA	NA	NA	NA	NA	NA	NA	NA	66	67	2.04326e-06	42	43
ISSIFYTI	ATCAGTTCGATCTTTTACACAATT	Pool 13	2537	2538	0.000274691	1140	1141	6.07094e-05	520	521	8.4938e-06	1476	1477	2.39078e-05	NA	NA	NA	NA	NA	NA	NA	NA	NA	NA	NA	NA	NA	NA	NA	6376	6377	0.000350565	5112	5113	0.000283403	NA	NA	NA	NA	NA	NA	NA	NA	NA	486	487	1.48517e-05	1689	1690
ISSNHSPL	ATTTCCAGTAACCACAGCCCTCTC	Pool 13	3699	3700	0.000400456	4994	4995	0.00026577	2972	2973	4.84685e-05	11658	11659	0.000188721	NA	NA	NA	NA	NA	NA	NA	NA	NA	NA	NA	NA	NA	NA	NA	9092	9093	0.000499872	8358	8359	0.000463322	NA	NA	NA	NA	NA	NA	NA	NA	NA	1644	1645	5.01666e-05	1999	2000
ISSRYLRF	ATATCCTCTAGATATCTTCGGTTT	Pool 13	3597	3598	0.000389417	2188	2189	0.000116471	5500	5501	8.96822e-05	8654	8655	0.000140096	NA	NA	NA	NA	NA	NA	NA	NA	NA	NA	NA	NA	NA	NA	NA	12302	12303	0.000676337	7624	7625	0.000422638	NA	NA	NA	NA	NA	NA	NA	NA	NA	971	972	2.96425e-05	6103	6104
ISSTFELI	ATCTCTAGCACTTTTGAACTAATC	Pool 13	165	166	1.79664e-05	52	53	2.81998e-06	54	55	8.96658e-07	20	21	3.39921e-07	NA	NA	NA	NA	NA	NA	NA	NA	NA	NA	NA	NA	NA	NA	NA	502	503	2.76516e-05	350	351	1.94552e-05	NA	NA	NA	NA	NA	NA	NA	NA	NA	7	8	2.43971e-07	6	7
ISSYFVST	ATTAGTTCATACTTTGTGTCAACG	Pool 13	1267	1268	0.000137238	284	285	1.5164e-05	516	517	8.42859e-06	142	143	2.3147e-06	NA	NA	NA	NA	NA	NA	NA	NA	NA	NA	NA	NA	NA	NA	NA	3708	3709	0.000203896	2838	2839	0.00015736	NA	NA	NA	NA	NA	NA	NA	NA	NA	227	228	6.95318e-06	385	386
ISTFLDTL	ATTTCTACTTTTCTCGACACCCTC	Pool 13	266	267	2.88978e-05	990	991	5.27283e-05	172	173	2.8204e-06	56	57	9.22643e-07	NA	NA	NA	NA	NA	NA	NA	NA	NA	NA	NA	NA	NA	NA	NA	412	413	2.2704e-05	944	945	5.23794e-05	NA	NA	NA	NA	NA	NA	NA	NA	NA	326	327	9.97232e-06	18	19
ISVATAAM	ATATCCGTTGCCACGGCCGCGATG	Pool 13	9	10	1.08231e-06	NA	1	5.32072e-08	12	13	2.11937e-07	8	9	1.45681e-07	NA	NA	NA	NA	NA	NA	NA	NA	NA	NA	NA	NA	NA	NA	NA	420	421	2.31438e-05	164	165	9.14561e-06	NA	NA	NA	NA	NA	NA	NA	NA	NA	3	4	1.21986e-07	NA	1
ISVGSFLL	ATAAGTGTGGGTTCATTTCTCCTT	Pool 13	7554	7555	0.000817689	2164	2165	0.000115194	1696	1697	2.7666e-05	2888	2889	4.67635e-05	NA	NA	NA	NA	NA	NA	NA	NA	NA	NA	NA	NA	NA	NA	NA	14086	14087	0.000774409	12290	12291	0.000681265	NA	NA	NA	NA	NA	NA	NA	NA	NA	2076	2077	6.3341e-05	4035	4036
ISVIYKKF	ATTAGCGTAATATATAAGAAATTT	Pool 13	5489	5490	0.000594191	2770	2771	0.000147437	716	717	1.16892e-05	14714	14715	0.000238188	NA	NA	NA	NA	NA	NA	NA	NA	NA	NA	NA	NA	NA	NA	NA	11262	11263	0.000619164	9838	9839	0.000545356	NA	NA	NA	NA	NA	NA	NA	NA	NA	8070	8071	0.000246136	2208	2209
ISVKLTSV	ATCTCCGTGAAGCTCACTTCTGTC	Pool 13	440	441	4.77301e-05	22	23	1.22377e-06	244	245	3.99421e-06	54	55	8.9027e-07	NA	NA	NA	NA	NA	NA	NA	NA	NA	NA	NA	NA	NA	NA	NA	3176	3177	0.00017465	704	705	3.90767e-05	NA	NA	NA	NA	NA	NA	NA	NA	NA	19	20	6.09928e-07	8	9
ISVLFLLA	ATTTCCGTGCTCTTTCTTTTGGCT	Pool 13	534	535	5.79038e-05	894	895	4.76204e-05	32	33	5.37995e-07	3008	3009	4.87059e-05	NA	NA	NA	NA	NA	NA	NA	NA	NA	NA	NA	NA	NA	NA	NA	1202	1203	6.61329e-05	1100	1101	6.10262e-05	NA	NA	NA	NA	NA	NA	NA	NA	NA	156	157	4.78793e-06	65	66
ISVLVSAL	ATCTCGGTGCTAGTATCGGCACTT	Pool 13	270	271	2.93307e-05	30	31	1.64942e-06	38	39	6.35812e-07	70	71	1.14926e-06	NA	NA	NA	NA	NA	NA	NA	NA	NA	NA	NA	NA	NA	NA	NA	1406	1407	7.73474e-05	634	635	3.51968e-05	NA	NA	NA	NA	NA	NA	NA	NA	NA	173	174	5.30637e-06	34	35
ISVQFNQL	ATCAGCGTGCAGTTCAATCAGCTC	Pool 13	780	781	8.45288e-05	42	43	2.28791e-06	6	7	1.1412e-07	772	773	1.25123e-05	NA	NA	NA	NA	NA	NA	NA	NA	NA	NA	NA	NA	NA	NA	NA	816	817	4.49132e-05	1662	1663	9.21767e-05	NA	NA	NA	NA	NA	NA	NA	NA	NA	230	231	7.04467e-06	46	47
ISWCLLLL	ATTTCGTGGTGTTTGCTGTTATTG	Pool 13	190	191	2.06722e-05	84	85	4.52261e-06	2	3	4.89086e-08	96	97	1.57011e-06	NA	NA	NA	NA	NA	NA	NA	NA	NA	NA	NA	NA	NA	NA	NA	284	285	1.56674e-05	690	691	3.83007e-05	NA	NA	NA	NA	NA	NA	NA	NA	NA	45	46	1.40283e-06	5	6
ISWILVLV	ATCTCATGGATTCTGGTGCTAGTA	Pool 13	912	913	9.88153e-05	2034	2035	0.000108277	6	7	1.1412e-07	7096	7097	0.000114877	NA	NA	NA	NA	NA	NA	NA	NA	NA	NA	NA	NA	NA	NA	NA	2018	2019	0.000110991	2130	2131	0.000118117	NA	NA	NA	NA	NA	NA	NA	NA	NA	80	81	2.47021e-06	270	271
ISWIQNTM	ATCTCGTGGATTCAAAATACCATG	Pool 13	377	378	4.09115e-05	164	165	8.77919e-06	6	7	1.1412e-07	154	155	2.50894e-06	NA	NA	NA	NA	NA	NA	NA	NA	NA	NA	NA	NA	NA	NA	NA	506	507	2.78715e-05	1640	1641	9.09573e-05	NA	NA	NA	NA	NA	NA	NA	NA	NA	NA	1	3.04964e-08	81	82
ISWLKDGL	ATTAGCTGGCTGAAAGACGGTCTC	Pool 13	192	193	2.08887e-05	128	129	6.86373e-06	6	7	1.1412e-07	4	5	8.09336e-08	NA	NA	NA	NA	NA	NA	NA	NA	NA	NA	NA	NA	NA	NA	NA	346	347	1.90757e-05	170	171	9.47818e-06	NA	NA	NA	NA	NA	NA	NA	NA	NA	72	73	2.22624e-06	28	29
ISWLPYSI	ATAAGCTGGCTCCCTTACTCCATT	Pool 13	1473	1474	0.000159533	2256	2257	0.000120089	82	83	1.35314e-06	274	275	4.45135e-06	NA	NA	NA	NA	NA	NA	NA	NA	NA	NA	NA	NA	NA	NA	NA	5364	5365	0.000294932	4470	4471	0.000247818	NA	NA	NA	NA	NA	NA	NA	NA	NA	52	53	1.61631e-06	177	178
ISWTIGFI	ATTTCTTGGACGATTGGTTTTATC	Pool 13	1746	1747	0.00018908	2178	2179	0.000115938	2856	2857	4.65773e-05	1136	1137	1.84043e-05	NA	NA	NA	NA	NA	NA	NA	NA	NA	NA	NA	NA	NA	NA	NA	4326	4327	0.000237869	3966	3967	0.000219883	NA	NA	NA	NA	NA	NA	NA	NA	NA	3420	3421	0.000104328	850	851
ISWVYFRK	ATCTCGTGGGTATACTTTCGAAAA	Pool 13	21	22	2.38109e-06	NA	1	5.32072e-08	4	5	8.15144e-08	2	3	4.85602e-08	NA	NA	NA	NA	NA	NA	NA	NA	NA	NA	NA	NA	NA	NA	NA	76	77	4.23294e-06	NA	1	5.5428e-08	NA	NA	NA	NA	NA	NA	NA	NA	NA	NA	1	3.04964e-08	NA	1
ISYAFILA	ATTAGCTATGCATTTATCTTAGCT	Pool 13	4141	4142	0.000448295	30686	30687	0.00163277	252820	252821	0.00412171	699778	699779	0.0113271	NA	NA	NA	NA	NA	NA	NA	NA	NA	NA	NA	NA	NA	NA	NA	7574	7575	0.000416423	8686	8687	0.000481503	NA	NA	NA	NA	NA	NA	NA	NA	NA	119775	119776	0.00365274	75556	75557
ISYALFAP	ATATCATACGCTCTCTTTGCTCCA	Pool 13	9138	9139	0.000989127	2276	2277	0.000121153	470	471	7.67866e-06	1326	1327	2.14798e-05	NA	NA	NA	NA	NA	NA	NA	NA	NA	NA	NA	NA	NA	NA	NA	6564	6565	0.0003609	4026	4027	0.000223208	NA	NA	NA	NA	NA	NA	NA	NA	NA	3455	3456	0.000105396	920	921
ISYAMNFT	ATATCATATGCGATGAACTTCACT	Pool 13	490	491	5.31417e-05	186	187	9.94974e-06	186	187	3.04864e-06	10	11	1.78054e-07	NA	NA	NA	NA	NA	NA	NA	NA	NA	NA	NA	NA	NA	NA	NA	1736	1737	9.54886e-05	1282	1283	7.11141e-05	NA	NA	NA	NA	NA	NA	NA	NA	NA	126	127	3.87304e-06	67	68
ISYEDHKL	ATTAGCTACGAGGATCATAAACTA	Pool 13	619	620	6.71035e-05	802	803	4.27254e-05	270	271	4.41808e-06	854	855	1.38397e-05	NA	NA	NA	NA	NA	NA	NA	NA	NA	NA	NA	NA	NA	NA	NA	2050	2051	0.00011275	2826	2827	0.000156695	NA	NA	NA	NA	NA	NA	NA	NA	NA	93	94	2.86666e-06	641	642
ISYEQCML	ATTAGCTATGAGCAGTGCATGCTC	Pool 13	65	66	7.14328e-06	38	39	2.07508e-06	26	27	4.40178e-07	24	25	4.04668e-07	NA	NA	NA	NA	NA	NA	NA	NA	NA	NA	NA	NA	NA	NA	NA	292	293	1.61072e-05	576	577	3.19819e-05	NA	NA	NA	NA	NA	NA	NA	NA	NA	NA	1	3.04964e-08	26	27
ISYFCILF	ATCTCATACTTCTGCATACTCTTC	Pool 13	1213	1214	0.000131393	1924	1925	0.000102424	2104	2105	3.43176e-05	918	919	1.48756e-05	NA	NA	NA	NA	NA	NA	NA	NA	NA	NA	NA	NA	NA	NA	NA	2490	2491	0.000136938	3416	3417	0.000189397	NA	NA	NA	NA	NA	NA	NA	NA	NA	1159	1160	3.53758e-05	1015	1016
ISYFEIFL	ATTTCCTACTTTGAGATATTCCTG	Pool 13	386	387	4.18856e-05	232	233	1.23973e-05	118	119	1.94004e-06	1908	1909	3.09005e-05	NA	NA	NA	NA	NA	NA	NA	NA	NA	NA	NA	NA	NA	NA	NA	1228	1229	6.75622e-05	1074	1075	5.95851e-05	NA	NA	NA	NA	NA	NA	NA	NA	NA	580	581	1.77184e-05	357	358
ISYFFILL	ATCTCCTATTTCTTTATATTACTA	Pool 13	579	580	6.27743e-05	386	387	2.05912e-05	452	453	7.38521e-06	444	445	7.20309e-06	NA	NA	NA	NA	NA	NA	NA	NA	NA	NA	NA	NA	NA	NA	NA	1436	1437	7.89966e-05	1300	1301	7.21118e-05	NA	NA	NA	NA	NA	NA	NA	NA	NA	145	146	4.45247e-06	374	375
ISYIVVLV	ATTTCTTATATTGTGGTACTGGTC	Pool 13	8223	8224	0.000890096	6710	6711	0.000357073	3698	3699	6.03044e-05	6634	6635	0.000107399	NA	NA	NA	NA	NA	NA	NA	NA	NA	NA	NA	NA	NA	NA	NA	11758	11759	0.000646431	15930	15931	0.000883023	NA	NA	NA	NA	NA	NA	NA	NA	NA	3399	3400	0.000103688	8274	8275
ISYLGFFI	ATCTCATATCTGGGGTTCTTTATC	Pool 13	1008	1009	0.000109206	316	317	1.68667e-05	76	77	1.25532e-06	1308	1309	2.11884e-05	NA	NA	NA	NA	NA	NA	NA	NA	NA	NA	NA	NA	NA	NA	NA	2008	2009	0.000110441	2094	2095	0.000116122	NA	NA	NA	NA	NA	NA	NA	NA	NA	29	30	9.14892e-07	32	33
ISYLRCVV	ATAAGTTACCTTCGGTGTGTTGTC	Pool 13	516	517	5.59557e-05	416	417	2.21874e-05	152	153	2.49434e-06	722	723	1.1703e-05	NA	NA	NA	NA	NA	NA	NA	NA	NA	NA	NA	NA	NA	NA	NA	2660	2661	0.000146284	1324	1325	7.3442e-05	NA	NA	NA	NA	NA	NA	NA	NA	NA	44	45	1.37234e-06	38	39
ISYRKFTS	ATTAGTTATCGGAAGTTTACCAGT	Pool 13	111	112	1.21219e-05	28	29	1.54301e-06	40	41	6.68418e-07	30	31	5.01789e-07	NA	NA	NA	NA	NA	NA	NA	NA	NA	NA	NA	NA	NA	NA	NA	310	311	1.70967e-05	152	153	8.48048e-06	NA	NA	NA	NA	NA	NA	NA	NA	NA	11	12	3.65957e-07	28	29
ISYTYIIS	ATCAGCTACACCTATATAATTTCT	Pool 13	248	249	2.69496e-05	50	51	2.71357e-06	62	63	1.02708e-06	222	223	3.60964e-06	NA	NA	NA	NA	NA	NA	NA	NA	NA	NA	NA	NA	NA	NA	NA	792	793	4.35938e-05	624	625	3.46425e-05	NA	NA	NA	NA	NA	NA	NA	NA	NA	2	3	9.14892e-08	63	64
ITAAIALL	ATAACAGCAGCAATAGCATTGCTC	Pool 13	384	385	4.16691e-05	204	205	1.09075e-05	38	39	6.35812e-07	106	107	1.73198e-06	NA	NA	NA	NA	NA	NA	NA	NA	NA	NA	NA	NA	NA	NA	NA	2438	2439	0.00013408	636	637	3.53076e-05	NA	NA	NA	NA	NA	NA	NA	NA	NA	5	6	1.82978e-07	602	603
ITAKFIQI	ATTACCGCCAAGTTTATCCAGATT	Pool 13	9	10	1.08231e-06	NA	1	5.32072e-08	4	5	8.15144e-08	8	9	1.45681e-07	NA	NA	NA	NA	NA	NA	NA	NA	NA	NA	NA	NA	NA	NA	NA	466	467	2.56725e-05	204	205	1.13627e-05	NA	NA	NA	NA	NA	NA	NA	NA	NA	NA	1	3.04964e-08	NA	1
ITALCFSL	ATCACCGCACTGTGCTTCTCTTTA	Pool 13	265	266	2.87896e-05	1270	1271	6.76263e-05	510	511	8.33077e-06	124	125	2.02334e-06	NA	NA	NA	NA	NA	NA	NA	NA	NA	NA	NA	NA	NA	NA	NA	1646	1647	9.0541e-05	4574	4575	0.000253583	NA	NA	NA	NA	NA	NA	NA	NA	NA	1276	1277	3.89439e-05	203	204
ITASYIMI	ATTACGGCGTCTTACATCATGATT	Pool 13	4083	4084	0.000442017	14620	14621	0.000777942	7860	7861	0.000128157	28768	28769	0.000465676	NA	NA	NA	NA	NA	NA	NA	NA	NA	NA	NA	NA	NA	NA	NA	8980	8981	0.000493715	8950	8951	0.000496136	NA	NA	NA	NA	NA	NA	NA	NA	NA	10321	10322	0.000314784	14633	14634
ITDFRGLL	ATTACGGACTTTCGAGGGTTGCTA	Pool 13	340	341	3.69069e-05	12	13	6.91693e-07	NA	1	1.63029e-08	4	5	8.09336e-08	NA	NA	NA	NA	NA	NA	NA	NA	NA	NA	NA	NA	NA	NA	NA	1312	1313	7.21799e-05	874	875	4.84995e-05	NA	NA	NA	NA	NA	NA	NA	NA	NA	NA	1	3.04964e-08	8	9
ITDYRVRL	ATAACAGATTACCGGGTCCGCCTC	Pool 13	26	27	2.92225e-06	2	3	1.59622e-07	4	5	8.15144e-08	NA	1	1.61867e-08	NA	NA	NA	NA	NA	NA	NA	NA	NA	NA	NA	NA	NA	NA	NA	36	37	2.03401e-06	62	63	3.49196e-06	NA	NA	NA	NA	NA	NA	NA	NA	NA	NA	1	3.04964e-08	NA	1
ITFEHIMA	ATTACCTTCGAACATATAATGGCC	Pool 13	263	264	2.85731e-05	208	209	1.11203e-05	30	31	5.05389e-07	1240	1241	2.00877e-05	NA	NA	NA	NA	NA	NA	NA	NA	NA	NA	NA	NA	NA	NA	NA	312	313	1.72066e-05	412	413	2.28917e-05	NA	NA	NA	NA	NA	NA	NA	NA	NA	54	55	1.6773e-06	27	28
ITFINEYL	ATCACTTTCATTAATGAGTACTTA	Pool 13	4238	4239	0.000458793	1282	1283	6.82648e-05	398	399	6.50485e-06	10300	10301	0.000166739	NA	NA	NA	NA	NA	NA	NA	NA	NA	NA	NA	NA	NA	NA	NA	7898	7899	0.000434234	6642	6643	0.000368208	NA	NA	NA	NA	NA	NA	NA	NA	NA	1486	1487	4.53481e-05	1041	1042
ITFKCPFF	ATAACATTCAAATGTCCATTCTTT	Pool 13	396	397	4.29679e-05	96	97	5.1611e-06	46	47	7.66235e-07	408	409	6.62037e-06	NA	NA	NA	NA	NA	NA	NA	NA	NA	NA	NA	NA	NA	NA	NA	904	905	4.97508e-05	2140	2141	0.000118671	NA	NA	NA	NA	NA	NA	NA	NA	NA	13	14	4.26949e-07	51	52
ITFLSLKL	ATAACCTTCCTATCGCTTAAACTT	Pool 13	484	485	5.24923e-05	560	561	2.98492e-05	10	11	1.79332e-07	88	89	1.44062e-06	NA	NA	NA	NA	NA	NA	NA	NA	NA	NA	NA	NA	NA	NA	NA	1400	1401	7.70176e-05	932	933	5.17143e-05	NA	NA	NA	NA	NA	NA	NA	NA	NA	1145	1146	3.49489e-05	33	34
ITFLYTLA	ATAACCTTCCTGTACACATTGGCC	Pool 13	43	44	4.76218e-06	12	13	6.91693e-07	22	23	3.74966e-07	NA	1	1.61867e-08	NA	NA	NA	NA	NA	NA	NA	NA	NA	NA	NA	NA	NA	NA	NA	64	65	3.57326e-06	76	77	4.26795e-06	NA	NA	NA	NA	NA	NA	NA	NA	NA	2	3	9.14892e-08	2	3
ITFSKNAV	ATCACCTTCTCAAAGAACGCCGTA	Pool 13	298	299	3.23612e-05	68	69	3.6713e-06	NA	1	1.63029e-08	10	11	1.78054e-07	NA	NA	NA	NA	NA	NA	NA	NA	NA	NA	NA	NA	NA	NA	NA	1586	1587	8.72426e-05	498	499	2.76585e-05	NA	NA	NA	NA	NA	NA	NA	NA	NA	NA	1	3.04964e-08	77	78
ITFSYFQL	ATAACCTTCTCCTATTTCCAATTA	Pool 13	1419	1420	0.000153689	496	497	2.6444e-05	676	677	1.10371e-05	12450	12451	0.000201541	NA	NA	NA	NA	NA	NA	NA	NA	NA	NA	NA	NA	NA	NA	NA	2700	2701	0.000148483	4546	4547	0.000252031	NA	NA	NA	NA	NA	NA	NA	NA	NA	484	485	1.47907e-05	75	76
ITFTLSHV	ATTACTTTCACCCTCTCACACGTG	Pool 13	291	292	3.16036e-05	1742	1743	9.27401e-05	2444	2445	3.98605e-05	4956	4957	8.02376e-05	NA	NA	NA	NA	NA	NA	NA	NA	NA	NA	NA	NA	NA	NA	NA	946	947	5.20597e-05	1206	1207	6.69015e-05	NA	NA	NA	NA	NA	NA	NA	NA	NA	6788	6789	0.00020704	76867	76868
ITFTSLHM	ATCACATTTACCAGTCTACATATG	Pool 13	192	193	2.08887e-05	110	111	5.906e-06	622	623	1.01567e-05	2006	2007	3.24868e-05	NA	NA	NA	NA	NA	NA	NA	NA	NA	NA	NA	NA	NA	NA	NA	400	401	2.20443e-05	156	157	8.70219e-06	NA	NA	NA	NA	NA	NA	NA	NA	NA	310	311	9.48438e-06	158	159
ITFVCFYL	ATAACGTTTGTATGCTTCTACCTA	Pool 13	17382	17383	0.00188139	54170	54171	0.00288229	20134	20135	0.000328259	10802	10803	0.000174865	NA	NA	NA	NA	NA	NA	NA	NA	NA	NA	NA	NA	NA	NA	NA	27012	27013	0.00148499	17588	17589	0.000974922	NA	NA	NA	NA	NA	NA	NA	NA	NA	13622	13623	0.000415452	13909	13910
ITFYFQQP	ATAACCTTTTACTTTCAACAGCCT	Pool 13	4238	4239	0.000458793	2332	2333	0.000124132	4852	4853	7.91179e-05	1722	1723	2.78897e-05	NA	NA	NA	NA	NA	NA	NA	NA	NA	NA	NA	NA	NA	NA	NA	4932	4933	0.000271183	11400	11401	0.000631934	NA	NA	NA	NA	NA	NA	NA	NA	NA	1646	1647	5.02276e-05	2807	2808
ITGAFVSL	ATTACTGGAGCGTTTGTGTCATTG	Pool 13	67	68	7.35974e-06	NA	1	5.32072e-08	8	9	1.46726e-07	10	11	1.78054e-07	NA	NA	NA	NA	NA	NA	NA	NA	NA	NA	NA	NA	NA	NA	NA	196	197	1.08297e-05	202	203	1.12519e-05	NA	NA	NA	NA	NA	NA	NA	NA	NA	13	14	4.26949e-07	21	22
ITGVLYAL	ATTACGGGAGTGCTTTATGCCCTG	Pool 13	540	541	5.85532e-05	194	195	1.03754e-05	52	53	8.64053e-07	1346	1347	2.18035e-05	NA	NA	NA	NA	NA	NA	NA	NA	NA	NA	NA	NA	NA	NA	NA	1554	1555	8.54835e-05	1098	1099	6.09153e-05	NA	NA	NA	NA	NA	NA	NA	NA	NA	384	385	1.17411e-05	118	119
ITGVMGNL	ATTACTGGCGTTATGGGCAACTTA	Pool 13	2463	2464	0.000266682	3534	3535	0.000188087	2242	2243	3.65674e-05	4070	4071	6.58962e-05	NA	NA	NA	NA	NA	NA	NA	NA	NA	NA	NA	NA	NA	NA	NA	6516	6517	0.000358261	5486	5487	0.000304133	NA	NA	NA	NA	NA	NA	NA	NA	NA	2095	2096	6.39204e-05	4338	4339
ITHRFTHL	ATAACTCACAGATTTACACACTTG	Pool 13	4008	4009	0.0004339	1868	1869	9.94442e-05	5464	5465	8.90952e-05	2156	2157	3.49148e-05	NA	NA	NA	NA	NA	NA	NA	NA	NA	NA	NA	NA	NA	NA	NA	8844	8845	0.000486239	8360	8361	0.000463433	NA	NA	NA	NA	NA	NA	NA	NA	NA	20109	20110	0.000613282	3528	3529
ITIIFKNM	ATAACGATAATATTCAAGAACATG	Pool 13	956	957	0.000103578	632	633	3.36802e-05	1666	1667	2.71769e-05	16440	16441	0.000266126	NA	NA	NA	NA	NA	NA	NA	NA	NA	NA	NA	NA	NA	NA	NA	2358	2359	0.000129682	1754	1755	9.72761e-05	NA	NA	NA	NA	NA	NA	NA	NA	NA	168	169	5.15389e-06	4281	4282
ITIWFSSG	ATAACTATTTGGTTTTCCAGTGGC	Pool 13	298	299	3.23612e-05	138	139	7.3958e-06	60	61	9.94476e-07	142	143	2.3147e-06	NA	NA	NA	NA	NA	NA	NA	NA	NA	NA	NA	NA	NA	NA	NA	742	743	4.08452e-05	836	837	4.63932e-05	NA	NA	NA	NA	NA	NA	NA	NA	NA	108	109	3.32411e-06	142	143
ITKDWVQL	ATAACAAAGGACTGGGTTCAGCTG	Pool 13	180	181	1.95899e-05	98	99	5.26751e-06	NA	1	1.63029e-08	550	551	8.91889e-06	NA	NA	NA	NA	NA	NA	NA	NA	NA	NA	NA	NA	NA	NA	NA	1200	1201	6.60229e-05	296	297	1.64621e-05	NA	NA	NA	NA	NA	NA	NA	NA	NA	12	13	3.96453e-07	113	114
ITLAFSRT	ATAACCTTGGCTTTTAGCAGAACC	Pool 13	1422	1423	0.000154013	32	33	1.75584e-06	12	13	2.11937e-07	208	209	3.38303e-06	NA	NA	NA	NA	NA	NA	NA	NA	NA	NA	NA	NA	NA	NA	NA	940	941	5.17299e-05	792	793	4.39544e-05	NA	NA	NA	NA	NA	NA	NA	NA	NA	13	14	4.26949e-07	20	21
ITLAGFHL	ATCACCCTAGCAGGGTTTCATTTA	Pool 13	125	126	1.36372e-05	8	9	4.78865e-07	76	77	1.25532e-06	8	9	1.45681e-07	NA	NA	NA	NA	NA	NA	NA	NA	NA	NA	NA	NA	NA	NA	NA	106	107	5.88214e-06	398	399	2.21158e-05	NA	NA	NA	NA	NA	NA	NA	NA	NA	3	4	1.21986e-07	6	7
ITLALPRL	ATTACACTAGCACTGCCCCGTTTG	Pool 13	426	427	4.62148e-05	254	255	1.35678e-05	12	13	2.11937e-07	296	297	4.80746e-06	NA	NA	NA	NA	NA	NA	NA	NA	NA	NA	NA	NA	NA	NA	NA	1032	1033	5.67874e-05	802	803	4.45086e-05	NA	NA	NA	NA	NA	NA	NA	NA	NA	83	84	2.5617e-06	63	64
ITLAVAGV	ATAACGCTTGCAGTCGCCGGAGTT	Pool 13	26	27	2.92225e-06	NA	1	5.32072e-08	NA	1	1.63029e-08	NA	1	1.61867e-08	NA	NA	NA	NA	NA	NA	NA	NA	NA	NA	NA	NA	NA	NA	NA	32	33	1.81412e-06	188	189	1.04759e-05	NA	NA	NA	NA	NA	NA	NA	NA	NA	NA	1	3.04964e-08	9	10
ITLQARTL	ATTACATTACAAGCGCGTACCCTA	Pool 13	4	5	5.41157e-07	NA	1	5.32072e-08	8	9	1.46726e-07	12	13	2.10427e-07	NA	NA	NA	NA	NA	NA	NA	NA	NA	NA	NA	NA	NA	NA	NA	26	27	1.48428e-06	44	45	2.49426e-06	NA	NA	NA	NA	NA	NA	NA	NA	NA	NA	1	3.04964e-08	6	7
ITLSIVGL	ATTACTCTATCGATCGTGGGGCTG	Pool 13	104	105	1.13643e-05	10	11	5.85279e-07	NA	1	1.63029e-08	132	133	2.15283e-06	NA	NA	NA	NA	NA	NA	NA	NA	NA	NA	NA	NA	NA	NA	NA	190	191	1.04999e-05	180	181	1.00325e-05	NA	NA	NA	NA	NA	NA	NA	NA	NA	4	5	1.52482e-07	4	5
ITLSLLLL	ATAACCTTATCCCTTTTGCTGTTA	Pool 13	1027	1028	0.000111262	1022	1023	5.4431e-05	148	149	2.42913e-06	340	341	5.51967e-06	NA	NA	NA	NA	NA	NA	NA	NA	NA	NA	NA	NA	NA	NA	NA	3608	3609	0.000198399	2250	2251	0.000124768	NA	NA	NA	NA	NA	NA	NA	NA	NA	184	185	5.64183e-06	454	455
ITLYFTDL	ATTACCTTGTACTTCACCGACCTT	Pool 13	883	884	9.56766e-05	396	397	2.11233e-05	318	319	5.20062e-06	6564	6565	0.000106266	NA	NA	NA	NA	NA	NA	NA	NA	NA	NA	NA	NA	NA	NA	NA	2542	2543	0.000139797	2414	2415	0.000133859	NA	NA	NA	NA	NA	NA	NA	NA	NA	521	522	1.59191e-05	424	425
ITLYTLYL	ATTACCCTTTATACGTTATATCTC	Pool 13	2375	2376	0.000257158	1782	1783	9.48684e-05	370	371	6.04837e-06	572	573	9.27499e-06	NA	NA	NA	NA	NA	NA	NA	NA	NA	NA	NA	NA	NA	NA	NA	7690	7691	0.0004228	4616	4617	0.000255911	NA	NA	NA	NA	NA	NA	NA	NA	NA	555	556	1.6956e-05	1567	1568
ITMPLVLL	ATAACTATGCCGTTGGTGCTTCTT	Pool 13	765	766	8.29053e-05	514	515	2.74017e-05	208	209	3.4073e-06	4	5	8.09336e-08	NA	NA	NA	NA	NA	NA	NA	NA	NA	NA	NA	NA	NA	NA	NA	2354	2355	0.000129462	2796	2797	0.000155032	NA	NA	NA	NA	NA	NA	NA	NA	NA	97	98	2.98865e-06	112	113
ITNFSARI	ATTACCAACTTTTCGGCGCGAATC	Pool 13	300	301	3.25777e-05	176	177	9.41767e-06	32	33	5.37995e-07	NA	1	1.61867e-08	NA	NA	NA	NA	NA	NA	NA	NA	NA	NA	NA	NA	NA	NA	NA	406	407	2.23741e-05	434	435	2.41112e-05	NA	NA	NA	NA	NA	NA	NA	NA	NA	2	3	9.14892e-08	408	409
ITPMLNPL	ATTACGCCTATGCTGAATCCACTT	Pool 13	1498	1499	0.000162239	860	861	4.58114e-05	284	285	4.64632e-06	52350	52351	0.000847391	NA	NA	NA	NA	NA	NA	NA	NA	NA	NA	NA	NA	NA	NA	NA	5332	5333	0.000293173	3340	3341	0.000185185	NA	NA	NA	NA	NA	NA	NA	NA	NA	7676	7677	0.000234121	1064	1065
ITPVYHNM	ATAACTCCGGTGTACCATAACATG	Pool 13	5	6	6.49389e-07	NA	1	5.32072e-08	NA	1	1.63029e-08	NA	1	1.61867e-08	NA	NA	NA	NA	NA	NA	NA	NA	NA	NA	NA	NA	NA	NA	NA	NA	1	5.49733e-08	NA	1	5.5428e-08	NA	NA	NA	NA	NA	NA	NA	NA	NA	NA	1	3.04964e-08	NA	1
ITPYECPL	ATCACCCCGTATGAGTGTCCACTG	Pool 13	3113	3114	0.000337033	480	481	2.55927e-05	296	297	4.84196e-06	266	267	4.32186e-06	NA	NA	NA	NA	NA	NA	NA	NA	NA	NA	NA	NA	NA	NA	NA	3752	3753	0.000206315	2952	2953	0.000163679	NA	NA	NA	NA	NA	NA	NA	NA	NA	533	534	1.62851e-05	170	171
ITQISAQL	ATCACACAAATTTCGGCGCAACTC	Pool 13	43	44	4.76218e-06	8	9	4.78865e-07	56	57	9.29264e-07	204	205	3.31828e-06	NA	NA	NA	NA	NA	NA	NA	NA	NA	NA	NA	NA	NA	NA	NA	74	75	4.123e-06	110	111	6.1525e-06	NA	NA	NA	NA	NA	NA	NA	NA	NA	2	3	9.14892e-08	NA	1
ITQLFDDL	ATCACGCAGCTGTTTGACGATTTA	Pool 13	1360	1361	0.000147303	1684	1685	8.96541e-05	40	41	6.68418e-07	1814	1815	2.93789e-05	NA	NA	NA	NA	NA	NA	NA	NA	NA	NA	NA	NA	NA	NA	NA	3850	3851	0.000211702	1578	1579	8.75207e-05	NA	NA	NA	NA	NA	NA	NA	NA	NA	46	47	1.43333e-06	142	143
ITRKFYAF	ATAACTCGGAAATTTTACGCTTTC	Pool 13	537	538	5.82285e-05	90	91	4.84185e-06	188	189	3.08124e-06	48	49	7.9315e-07	NA	NA	NA	NA	NA	NA	NA	NA	NA	NA	NA	NA	NA	NA	NA	728	729	4.00755e-05	1226	1227	6.80101e-05	NA	NA	NA	NA	NA	NA	NA	NA	NA	341	342	1.04298e-05	93	94
ITRLYSRF	ATTACTCGCCTCTACTCGAGGTTT	Pool 13	63	64	6.92681e-06	34	35	1.86225e-06	40	41	6.68418e-07	22	23	3.72295e-07	NA	NA	NA	NA	NA	NA	NA	NA	NA	NA	NA	NA	NA	NA	NA	1310	1311	7.207e-05	216	217	1.20279e-05	NA	NA	NA	NA	NA	NA	NA	NA	NA	6	7	2.13475e-07	26	27
ITSFLLAL	ATCACAAGCTTTCTCCTCGCTCTT	Pool 13	2275	2276	0.000246335	314	315	1.67603e-05	58	59	9.6187e-07	234	235	3.80388e-06	NA	NA	NA	NA	NA	NA	NA	NA	NA	NA	NA	NA	NA	NA	NA	3656	3657	0.000201037	2086	2087	0.000115678	NA	NA	NA	NA	NA	NA	NA	NA	NA	215	216	6.58722e-06	443	444
ITSLSFLL	ATTACCAGCCTTTCTTTCCTACTC	Pool 13	3902	3903	0.000422427	1280	1281	6.81584e-05	432	433	7.05915e-06	1262	1263	2.04438e-05	NA	NA	NA	NA	NA	NA	NA	NA	NA	NA	NA	NA	NA	NA	NA	7510	7511	0.000412904	5570	5571	0.000308789	NA	NA	NA	NA	NA	NA	NA	NA	NA	1018	1019	3.10758e-05	3591	3592
ITSRYPLM	ATTACTTCTAGATATCCGCTCATG	Pool 13	2438	2439	0.000263977	1518	1519	8.08217e-05	400	401	6.53746e-06	1318	1319	2.13503e-05	NA	NA	NA	NA	NA	NA	NA	NA	NA	NA	NA	NA	NA	NA	NA	7850	7851	0.000431595	4752	4753	0.000263449	NA	NA	NA	NA	NA	NA	NA	NA	NA	356	357	1.08872e-05	1276	1277
ITTISSNL	ATTACTACAATCTCGAGTAATTTG	Pool 13	67	68	7.35974e-06	8	9	4.78865e-07	4	5	8.15144e-08	20	21	3.39921e-07	NA	NA	NA	NA	NA	NA	NA	NA	NA	NA	NA	NA	NA	NA	NA	130	131	7.2015e-06	172	173	9.58904e-06	NA	NA	NA	NA	NA	NA	NA	NA	NA	2	3	9.14892e-08	5	6
ITTTHHTL	ATCACAACTACACATCATACATTG	Pool 13	1690	1691	0.000183019	1352	1353	7.19893e-05	1298	1299	2.11774e-05	9646	9647	0.000156153	NA	NA	NA	NA	NA	NA	NA	NA	NA	NA	NA	NA	NA	NA	NA	4674	4675	0.000257	3574	3575	0.000198155	NA	NA	NA	NA	NA	NA	NA	NA	NA	247	248	7.56311e-06	1064	1065
ITVCYGLM	ATCACAGTGTGCTACGGCCTGATG	Pool 13	61	62	6.71035e-06	2	3	1.59622e-07	16	17	2.77149e-07	NA	1	1.61867e-08	NA	NA	NA	NA	NA	NA	NA	NA	NA	NA	NA	NA	NA	NA	NA	174	175	9.62033e-06	64	65	3.60282e-06	NA	NA	NA	NA	NA	NA	NA	NA	NA	12	13	3.96453e-07	6	7
ITVFGNLL	ATAACCGTGTTCGGAAATTTGCTG	Pool 13	71	72	7.79267e-06	140	141	7.50221e-06	2	3	4.89086e-08	NA	1	1.61867e-08	NA	NA	NA	NA	NA	NA	NA	NA	NA	NA	NA	NA	NA	NA	NA	186	187	1.028e-05	504	505	2.79911e-05	NA	NA	NA	NA	NA	NA	NA	NA	NA	NA	1	3.04964e-08	24	25
ITVFWPPL	ATAACCGTGTTTTGGCCGCCCTTA	Pool 13	434	435	4.70807e-05	128	129	6.86373e-06	20	21	3.42361e-07	90	91	1.47299e-06	NA	NA	NA	NA	NA	NA	NA	NA	NA	NA	NA	NA	NA	NA	NA	884	885	4.86514e-05	644	645	3.5751e-05	NA	NA	NA	NA	NA	NA	NA	NA	NA	210	211	6.43474e-06	692	693
ITVSLIML	ATCACAGTATCACTCATCATGCTG	Pool 13	7	8	8.65852e-07	10	11	5.85279e-07	NA	1	1.63029e-08	NA	1	1.61867e-08	NA	NA	NA	NA	NA	NA	NA	NA	NA	NA	NA	NA	NA	NA	NA	22	23	1.26439e-06	NA	1	5.5428e-08	NA	NA	NA	NA	NA	NA	NA	NA	NA	NA	1	3.04964e-08	2	3
ITWVGILL	ATTACTTGGGTTGGAATCTTGTTA	Pool 13	3307	3308	0.00035803	7846	7847	0.000417517	2720	2721	4.43601e-05	5090	5091	8.24066e-05	NA	NA	NA	NA	NA	NA	NA	NA	NA	NA	NA	NA	NA	NA	NA	8198	8199	0.000450726	6560	6561	0.000363663	NA	NA	NA	NA	NA	NA	NA	NA	NA	5167	5168	0.000157605	1629	1630
ITYDGHPV	ATCACGTATGACGGCCACCCTGTA	Pool 13	1109	1110	0.000120137	2340	2341	0.000124558	522	523	8.52641e-06	1820	1821	2.9476e-05	NA	NA	NA	NA	NA	NA	NA	NA	NA	NA	NA	NA	NA	NA	NA	2856	2857	0.000157059	1150	1151	6.37976e-05	NA	NA	NA	NA	NA	NA	NA	NA	NA	200	201	6.12977e-06	1306	1307
ITYESPQI	ATAACATACGAGTCGCCCCAGATC	Pool 13	997	998	0.000108015	2194	2195	0.00011679	25760	25761	0.000419979	9544	9545	0.000154502	NA	NA	NA	NA	NA	NA	NA	NA	NA	NA	NA	NA	NA	NA	NA	2834	2835	0.000155849	2170	2171	0.000120334	NA	NA	NA	NA	NA	NA	NA	NA	NA	643	644	1.96397e-05	2812	2813
ITYEVLAL	ATAACATACGAGGTTCTCGCCTTA	Pool 13	1349	1350	0.000146112	190	191	1.01626e-05	264	265	4.32026e-06	76	77	1.24638e-06	NA	NA	NA	NA	NA	NA	NA	NA	NA	NA	NA	NA	NA	NA	NA	1334	1335	7.33894e-05	1244	1245	6.90078e-05	NA	NA	NA	NA	NA	NA	NA	NA	NA	653	654	1.99446e-05	648	649
ITYFIQQL	ATAACGTACTTTATTCAGCAATTG	Pool 13	348	349	3.77728e-05	58	59	3.13922e-06	8	9	1.46726e-07	122	123	1.99097e-06	NA	NA	NA	NA	NA	NA	NA	NA	NA	NA	NA	NA	NA	NA	NA	1178	1179	6.48135e-05	1364	1365	7.56592e-05	NA	NA	NA	NA	NA	NA	NA	NA	NA	33	34	1.03688e-06	65	66
ITYMRPQA	ATCACATATATGCGCCCGCAGGCG	Pool 13	17	18	1.94817e-06	46	47	2.50074e-06	NA	1	1.63029e-08	NA	1	1.61867e-08	NA	NA	NA	NA	NA	NA	NA	NA	NA	NA	NA	NA	NA	NA	NA	76	77	4.23294e-06	NA	1	5.5428e-08	NA	NA	NA	NA	NA	NA	NA	NA	NA	NA	1	3.04964e-08	NA	1
ITYRISGV	ATCACTTATCGTATATCGGGCGTC	Pool 13	787	788	8.52864e-05	958	959	5.10257e-05	270	271	4.41808e-06	23574	23575	0.000381602	NA	NA	NA	NA	NA	NA	NA	NA	NA	NA	NA	NA	NA	NA	NA	4274	4275	0.000235011	1898	1899	0.000105258	NA	NA	NA	NA	NA	NA	NA	NA	NA	2790	2791	8.51154e-05	1117	1118
ITYSIASL	ATTACATATAGTATTGCCTCTCTT	Pool 13	40421	40422	0.00437493	5388	5389	0.000286734	4432	4433	7.22707e-05	35298	35299	0.000571375	NA	NA	NA	NA	NA	NA	NA	NA	NA	NA	NA	NA	NA	NA	NA	22314	22315	0.00122673	15468	15469	0.000857415	NA	NA	NA	NA	NA	NA	NA	NA	NA	9036	9037	0.000275596	19799	19800
ITYSLLPA	ATTACATACAGTTTGCTACCAGCC	Pool 13	2244	2245	0.00024298	626	627	3.33609e-05	410	411	6.70048e-06	1078	1079	1.74655e-05	NA	NA	NA	NA	NA	NA	NA	NA	NA	NA	NA	NA	NA	NA	NA	6068	6069	0.000333633	5054	5055	0.000280188	NA	NA	NA	NA	NA	NA	NA	NA	NA	406	407	1.2412e-05	2309	2310
IVAEFGPM	ATAGTAGCTGAATTTGGACCAATG	Pool 13	226	227	2.45685e-05	18	19	1.01094e-06	22	23	3.74966e-07	NA	1	1.61867e-08	NA	NA	NA	NA	NA	NA	NA	NA	NA	NA	NA	NA	NA	NA	NA	674	675	3.7107e-05	360	361	2.00095e-05	NA	NA	NA	NA	NA	NA	NA	NA	NA	7	8	2.43971e-07	45	46
IVAHLGYL	ATTGTAGCGCATCTCGGCTATTTA	Pool 13	8981	8982	0.000972135	308416	308417	0.01641	303974	303975	0.00495567	398510	398511	0.00645059	NA	NA	NA	NA	NA	NA	NA	NA	NA	NA	NA	NA	NA	NA	NA	25414	25415	0.00139715	19670	19671	0.00109032	NA	NA	NA	NA	NA	NA	NA	NA	NA	449871	449872	0.0137195	429917	429918
IVAIQYRL	ATCGTTGCGATTCAATACAGGTTA	Pool 13	482	483	5.22758e-05	1170	1171	6.23056e-05	88	89	1.45096e-06	40	41	6.63656e-07	NA	NA	NA	NA	NA	NA	NA	NA	NA	NA	NA	NA	NA	NA	NA	1120	1121	6.16251e-05	846	847	4.69475e-05	NA	NA	NA	NA	NA	NA	NA	NA	NA	262	263	8.02055e-06	320	321
IVATFNEI	ATCGTTGCAACATTTAACGAAATC	Pool 13	257	258	2.79237e-05	166	167	8.8856e-06	116	117	1.90744e-06	NA	1	1.61867e-08	NA	NA	NA	NA	NA	NA	NA	NA	NA	NA	NA	NA	NA	NA	NA	878	879	4.83215e-05	804	805	4.46195e-05	NA	NA	NA	NA	NA	NA	NA	NA	NA	53	54	1.64681e-06	2017	2018
IVATLLGL	ATCGTGGCTACTCTGTTAGGGCTA	Pool 13	188	189	2.04557e-05	110	111	5.906e-06	84	85	1.38574e-06	NA	1	1.61867e-08	NA	NA	NA	NA	NA	NA	NA	NA	NA	NA	NA	NA	NA	NA	NA	880	881	4.84315e-05	430	431	2.38894e-05	NA	NA	NA	NA	NA	NA	NA	NA	NA	15	16	4.87942e-07	13	14
IVDKYHAL	ATTGTGGATAAGTATCACGCACTA	Pool 13	749	750	8.11736e-05	440	441	2.34644e-05	154	155	2.52695e-06	1330	1331	2.15445e-05	NA	NA	NA	NA	NA	NA	NA	NA	NA	NA	NA	NA	NA	NA	NA	2398	2399	0.000131881	2472	2473	0.000137073	NA	NA	NA	NA	NA	NA	NA	NA	NA	209	210	6.40424e-06	76	77
IVESYFML	ATTGTTGAGTCCTACTTTATGCTC	Pool 13	183	184	1.99146e-05	138	139	7.3958e-06	12	13	2.11937e-07	338	339	5.4873e-06	NA	NA	NA	NA	NA	NA	NA	NA	NA	NA	NA	NA	NA	NA	NA	528	529	2.90809e-05	694	695	3.85224e-05	NA	NA	NA	NA	NA	NA	NA	NA	NA	7	8	2.43971e-07	63	64
IVFAIENI	ATTGTATTTGCAATTGAGAACATC	Pool 13	5253	5254	0.000568648	1552	1553	8.26308e-05	922	923	1.50476e-05	2974	2975	4.81555e-05	NA	NA	NA	NA	NA	NA	NA	NA	NA	NA	NA	NA	NA	NA	NA	6982	6983	0.000383879	5556	5557	0.000308013	NA	NA	NA	NA	NA	NA	NA	NA	NA	4211	4212	0.000128451	2564	2565
IVFCSALL	ATTGTGTTTTGTTCCGCACTGCTC	Pool 13	929	930	0.000100655	1564	1565	8.32693e-05	200	201	3.27688e-06	2894	2895	4.68606e-05	NA	NA	NA	NA	NA	NA	NA	NA	NA	NA	NA	NA	NA	NA	NA	2226	2227	0.000122426	1822	1823	0.000101045	NA	NA	NA	NA	NA	NA	NA	NA	NA	706	707	2.15609e-05	1446	1447
IVFEHLVF	ATAGTTTTCGAACACCTAGTGTTC	Pool 13	6781	6782	0.000734026	596	597	3.17647e-05	424	425	6.92872e-06	1084	1085	1.75626e-05	NA	NA	NA	NA	NA	NA	NA	NA	NA	NA	NA	NA	NA	NA	NA	2014	2015	0.000110771	2872	2873	0.000159245	NA	NA	NA	NA	NA	NA	NA	NA	NA	694	695	2.1195e-05	377	378
IVFIAASL	ATAGTATTTATTGCCGCCTCATTA	Pool 13	604	605	6.548e-05	24	25	1.33018e-06	110	111	1.80962e-06	136	137	2.21758e-06	NA	NA	NA	NA	NA	NA	NA	NA	NA	NA	NA	NA	NA	NA	NA	1854	1855	0.000101975	2938	2939	0.000162903	NA	NA	NA	NA	NA	NA	NA	NA	NA	19	20	6.09928e-07	11	12
IVFIFSGS	ATAGTCTTTATATTTTCTGGCTCG	Pool 13	377	378	4.09115e-05	60	61	3.24564e-06	312	313	5.1028e-06	1008	1009	1.63324e-05	NA	NA	NA	NA	NA	NA	NA	NA	NA	NA	NA	NA	NA	NA	NA	1106	1107	6.08554e-05	1090	1091	6.04719e-05	NA	NA	NA	NA	NA	NA	NA	NA	NA	431	432	1.31744e-05	100	101
IVFKNCLL	ATTGTGTTTAAGAATTGTCTCCTA	Pool 13	186	187	2.02393e-05	64	65	3.45847e-06	44	45	7.3363e-07	14	15	2.42801e-07	NA	NA	NA	NA	NA	NA	NA	NA	NA	NA	NA	NA	NA	NA	NA	332	333	1.83061e-05	394	395	2.1894e-05	NA	NA	NA	NA	NA	NA	NA	NA	NA	21	22	6.70921e-07	11	12
IVFLLMYL	ATTGTCTTTCTCCTGATGTACCTA	Pool 13	2033	2034	0.000220143	1616	1617	8.6036e-05	1086	1087	1.77212e-05	934	935	1.51346e-05	NA	NA	NA	NA	NA	NA	NA	NA	NA	NA	NA	NA	NA	NA	NA	5758	5759	0.000316591	5276	5277	0.000292493	NA	NA	NA	NA	NA	NA	NA	NA	NA	2019	2020	6.16027e-05	1447	1448
IVFLPPSF	ATCGTTTTCTTACCTCCCTCGTTT	Pool 13	897	898	9.71919e-05	1054	1055	5.61336e-05	56	57	9.29264e-07	978	979	1.58468e-05	NA	NA	NA	NA	NA	NA	NA	NA	NA	NA	NA	NA	NA	NA	NA	1774	1775	9.75776e-05	1094	1095	6.06936e-05	NA	NA	NA	NA	NA	NA	NA	NA	NA	184	185	5.64183e-06	74	75
IVFLQFAY	ATAGTCTTTCTTCAATTTGCCTAC	Pool 13	1367	1368	0.000148061	536	537	2.85723e-05	278	279	4.5485e-06	1168	1169	1.89223e-05	NA	NA	NA	NA	NA	NA	NA	NA	NA	NA	NA	NA	NA	NA	NA	3018	3019	0.000165964	5644	5645	0.000312891	NA	NA	NA	NA	NA	NA	NA	NA	NA	205	206	6.28226e-06	519	520
IVFLYSLY	ATCGTGTTTCTATACTCCCTGTAT	Pool 13	734	735	7.95501e-05	392	393	2.09104e-05	214	215	3.50512e-06	710	711	1.15088e-05	NA	NA	NA	NA	NA	NA	NA	NA	NA	NA	NA	NA	NA	NA	NA	4358	4359	0.000239629	2608	2609	0.000144612	NA	NA	NA	NA	NA	NA	NA	NA	NA	277	278	8.478e-06	347	348
IVFRFLRI	ATCGTCTTCAGATTTCTGAGAATA	Pool 13	551	552	5.97438e-05	1118	1119	5.95388e-05	800	801	1.30586e-05	94	95	1.53774e-06	NA	NA	NA	NA	NA	NA	NA	NA	NA	NA	NA	NA	NA	NA	NA	1430	1431	7.86668e-05	1436	1437	7.965e-05	NA	NA	NA	NA	NA	NA	NA	NA	NA	153	154	4.69644e-06	881	882
IVFSMMYT	ATTGTATTCTCGATGATGTATACG	Pool 13	201	202	2.18628e-05	302	303	1.61218e-05	806	807	1.31564e-05	1528	1529	2.47495e-05	NA	NA	NA	NA	NA	NA	NA	NA	NA	NA	NA	NA	NA	NA	NA	816	817	4.49132e-05	706	707	3.91876e-05	NA	NA	NA	NA	NA	NA	NA	NA	NA	804	805	2.45496e-05	303	304
IVHAVFAL	ATCGTTCACGCCGTATTTGCTCTA	Pool 13	1440	1441	0.000155962	476	477	2.53798e-05	26	27	4.40178e-07	366	367	5.94053e-06	NA	NA	NA	NA	NA	NA	NA	NA	NA	NA	NA	NA	NA	NA	NA	3174	3175	0.00017454	2536	2537	0.000140621	NA	NA	NA	NA	NA	NA	NA	NA	NA	110	111	3.3851e-06	500	501
IVHCVVQL	ATAGTTCACTGCGTGGTTCAGTTG	Pool 13	1075	1076	0.000116457	1930	1931	0.000102743	284	285	4.64632e-06	1856	1857	3.00588e-05	NA	NA	NA	NA	NA	NA	NA	NA	NA	NA	NA	NA	NA	NA	NA	1980	1981	0.000108902	3124	3125	0.000173212	NA	NA	NA	NA	NA	NA	NA	NA	NA	317	318	9.69785e-06	295	296
IVIFSEPL	ATCGTCATATTTAGCGAGCCCTTG	Pool 13	NA	1	1.08231e-07	NA	1	5.32072e-08	4	5	8.15144e-08	NA	1	1.61867e-08	NA	NA	NA	NA	NA	NA	NA	NA	NA	NA	NA	NA	NA	NA	NA	NA	1	5.49733e-08	NA	1	5.5428e-08	NA	NA	NA	NA	NA	NA	NA	NA	NA	3	4	1.21986e-07	NA	1
IVIILGNL	ATAGTAATAATACTGGGGAACCTG	Pool 13	3	4	4.32926e-07	NA	1	5.32072e-08	NA	1	1.63029e-08	NA	1	1.61867e-08	NA	NA	NA	NA	NA	NA	NA	NA	NA	NA	NA	NA	NA	NA	NA	8	9	4.9476e-07	48	49	2.71597e-06	NA	NA	NA	NA	NA	NA	NA	NA	NA	2	3	9.14892e-08	NA	1
IVIMYMMI	ATCGTAATCATGTACATGATGATC	Pool 13	2781	2782	0.0003011	1074	1075	5.71977e-05	638	639	1.04175e-05	1166	1167	1.88899e-05	NA	NA	NA	NA	NA	NA	NA	NA	NA	NA	NA	NA	NA	NA	NA	5588	5589	0.000307246	21988	21989	0.00121881	NA	NA	NA	NA	NA	NA	NA	NA	NA	675	676	2.06156e-05	598	599
IVKAFRYL	ATTGTTAAAGCTTTCCGCTATCTA	Pool 13	280	281	3.0413e-05	148	149	7.92787e-06	92	93	1.51617e-06	4	5	8.09336e-08	NA	NA	NA	NA	NA	NA	NA	NA	NA	NA	NA	NA	NA	NA	NA	294	295	1.62171e-05	2494	2495	0.000138293	NA	NA	NA	NA	NA	NA	NA	NA	NA	1	2	6.09928e-08	180	181
IVLEVAVL	ATCGTTTTAGAGGTCGCTGTACTA	Pool 13	1847	1848	0.000200012	354	355	1.88886e-05	48	49	7.98841e-07	778	779	1.26095e-05	NA	NA	NA	NA	NA	NA	NA	NA	NA	NA	NA	NA	NA	NA	NA	5026	5027	0.000276351	3654	3655	0.000202589	NA	NA	NA	NA	NA	NA	NA	NA	NA	218	219	6.67871e-06	829	830
IVLFADTL	ATCGTTCTATTTGCAGACACGCTC	Pool 13	NA	1	1.08231e-07	NA	1	5.32072e-08	2	3	4.89086e-08	NA	1	1.61867e-08	NA	NA	NA	NA	NA	NA	NA	NA	NA	NA	NA	NA	NA	NA	NA	4	5	2.74867e-07	NA	1	5.5428e-08	NA	NA	NA	NA	NA	NA	NA	NA	NA	1	2	6.09928e-08	NA	1
IVLFGSLL	ATTGTACTATTTGGTAGCCTCCTG	Pool 13	409	410	4.43749e-05	708	709	3.77239e-05	8	9	1.46726e-07	60	61	9.8739e-07	NA	NA	NA	NA	NA	NA	NA	NA	NA	NA	NA	NA	NA	NA	NA	1050	1051	5.77769e-05	366	367	2.03421e-05	NA	NA	NA	NA	NA	NA	NA	NA	NA	61	62	1.89078e-06	33	34
IVLHGATL	ATAGTTTTACACGGCGCCACGCTG	Pool 13	NA	1	1.08231e-07	NA	1	5.32072e-08	NA	1	1.63029e-08	NA	1	1.61867e-08	NA	NA	NA	NA	NA	NA	NA	NA	NA	NA	NA	NA	NA	NA	NA	NA	1	5.49733e-08	NA	1	5.5428e-08	NA	NA	NA	NA	NA	NA	NA	NA	NA	NA	1	3.04964e-08	NA	1
IVLILVSL	ATTGTGCTTATACTAGTTTCACTC	Pool 13	4296	4297	0.000465071	23334	23335	0.00124159	33606	33607	0.000547891	310820	310821	0.00503117	NA	NA	NA	NA	NA	NA	NA	NA	NA	NA	NA	NA	NA	NA	NA	11042	11043	0.00060707	14036	14037	0.000778042	NA	NA	NA	NA	NA	NA	NA	NA	NA	692493	692494	0.0211186	217788	217789
IVLKSPTL	ATCGTGCTGAAATCTCCAACCCTA	Pool 13	356	357	3.86386e-05	152	153	8.1407e-06	24	25	4.07572e-07	2	3	4.85602e-08	NA	NA	NA	NA	NA	NA	NA	NA	NA	NA	NA	NA	NA	NA	NA	812	813	4.46933e-05	568	569	3.15385e-05	NA	NA	NA	NA	NA	NA	NA	NA	NA	12	13	3.96453e-07	1	2
IVLKSSSL	ATCGTCCTTAAGTCCAGTTCATTA	Pool 13	1129	1130	0.000122302	436	437	2.32515e-05	228	229	3.73336e-06	424	425	6.87936e-06	NA	NA	NA	NA	NA	NA	NA	NA	NA	NA	NA	NA	NA	NA	NA	2156	2157	0.000118577	3480	3481	0.000192945	NA	NA	NA	NA	NA	NA	NA	NA	NA	505	506	1.54312e-05	215	216
IVLLEAGL	ATTGTATTACTGGAGGCGGGATTA	Pool 13	5124	5125	0.000554686	10596	10597	0.000563837	32424	32425	0.000528621	4010	4011	6.4925e-05	NA	NA	NA	NA	NA	NA	NA	NA	NA	NA	NA	NA	NA	NA	NA	14624	14625	0.000803985	9652	9653	0.000535046	NA	NA	NA	NA	NA	NA	NA	NA	NA	1890	1891	5.76687e-05	2818	2819
IVLLISYI	ATAGTTCTATTAATTAGTTATATA	Pool 13	318	319	3.45258e-05	2456	2457	0.00013073	82	83	1.35314e-06	538	539	8.72465e-06	NA	NA	NA	NA	NA	NA	NA	NA	NA	NA	NA	NA	NA	NA	NA	956	957	5.26095e-05	1374	1375	7.62134e-05	NA	NA	NA	NA	NA	NA	NA	NA	NA	41	42	1.28085e-06	165	166
IVLSGAHI	ATCGTGCTGTCAGGCGCGCACATA	Pool 13	1	2	2.16463e-07	NA	1	5.32072e-08	2	3	4.89086e-08	NA	1	1.61867e-08	NA	NA	NA	NA	NA	NA	NA	NA	NA	NA	NA	NA	NA	NA	NA	8	9	4.9476e-07	NA	1	5.5428e-08	NA	NA	NA	NA	NA	NA	NA	NA	NA	NA	1	3.04964e-08	8	9
IVLSYSYI	ATAGTTCTATCCTACTCCTACATA	Pool 13	2459	2460	0.000266249	1126	1127	5.99645e-05	448	449	7.31999e-06	12550	12551	0.00020316	NA	NA	NA	NA	NA	NA	NA	NA	NA	NA	NA	NA	NA	NA	NA	2076	2077	0.00011418	1638	1639	9.08464e-05	NA	NA	NA	NA	NA	NA	NA	NA	NA	532	533	1.62546e-05	788	789
IVLTLGVL	ATCGTGCTGACGTTAGGCGTCCTA	Pool 13	244	245	2.65167e-05	34	35	1.86225e-06	518	519	8.4612e-06	4	5	8.09336e-08	NA	NA	NA	NA	NA	NA	NA	NA	NA	NA	NA	NA	NA	NA	NA	694	695	3.82064e-05	428	429	2.37786e-05	NA	NA	NA	NA	NA	NA	NA	NA	NA	345	346	1.05518e-05	7	8
IVLYSFNL	ATAGTATTGTACTCTTTCAATCTT	Pool 13	2139	2140	0.000231615	1238	1239	6.59237e-05	268	269	4.38548e-06	3792	3793	6.13963e-05	NA	NA	NA	NA	NA	NA	NA	NA	NA	NA	NA	NA	NA	NA	NA	10842	10843	0.000596076	5276	5277	0.000292493	NA	NA	NA	NA	NA	NA	NA	NA	NA	210	211	6.43474e-06	1411	1412
IVMFLLQM	ATTGTGATGTTTCTGTTACAAATG	Pool 13	1174	1175	0.000127172	186	187	9.94974e-06	72	73	1.19011e-06	106	107	1.73198e-06	NA	NA	NA	NA	NA	NA	NA	NA	NA	NA	NA	NA	NA	NA	NA	2154	2155	0.000118467	3104	3105	0.000172104	NA	NA	NA	NA	NA	NA	NA	NA	NA	148	149	4.54396e-06	49	50
IVMIFAGF	ATTGTCATGATCTTTGCTGGATTT	Pool 13	8799	8800	0.000952437	624	625	3.32545e-05	138	139	2.2661e-06	538	539	8.72465e-06	NA	NA	NA	NA	NA	NA	NA	NA	NA	NA	NA	NA	NA	NA	NA	7788	7789	0.000428187	3382	3383	0.000187513	NA	NA	NA	NA	NA	NA	NA	NA	NA	216	217	6.61772e-06	218	219
IVMNLPNV	ATAGTGATGAATTTACCTAATGTG	Pool 13	175	176	1.90487e-05	78	79	4.20337e-06	60	61	9.94476e-07	32	33	5.34162e-07	NA	NA	NA	NA	NA	NA	NA	NA	NA	NA	NA	NA	NA	NA	NA	244	245	1.34685e-05	140	141	7.81534e-06	NA	NA	NA	NA	NA	NA	NA	NA	NA	NA	1	3.04964e-08	NA	1
IVMSRQHI	ATTGTAATGTCCCGACAACATATT	Pool 13	171	172	1.86158e-05	68	69	3.6713e-06	NA	1	1.63029e-08	16	17	2.75174e-07	NA	NA	NA	NA	NA	NA	NA	NA	NA	NA	NA	NA	NA	NA	NA	1158	1159	6.37141e-05	378	379	2.10072e-05	NA	NA	NA	NA	NA	NA	NA	NA	NA	16	17	5.18439e-07	NA	1
IVMSYARI	ATCGTCATGTCTTATGCCCGGATT	Pool 13	NA	1	1.08231e-07	NA	1	5.32072e-08	NA	1	1.63029e-08	NA	1	1.61867e-08	NA	NA	NA	NA	NA	NA	NA	NA	NA	NA	NA	NA	NA	NA	NA	NA	1	5.49733e-08	NA	1	5.5428e-08	NA	NA	NA	NA	NA	NA	NA	NA	NA	NA	1	3.04964e-08	NA	1
IVNEYTTL	ATCGTAAACGAGTATACTACTCTG	Pool 13	985	986	0.000106716	658	659	3.50635e-05	408	409	6.66788e-06	4248	4249	6.87774e-05	NA	NA	NA	NA	NA	NA	NA	NA	NA	NA	NA	NA	NA	NA	NA	1760	1761	9.6808e-05	1836	1837	0.000101821	NA	NA	NA	NA	NA	NA	NA	NA	NA	430	431	1.31439e-05	1160	1161
IVNFGLPL	ATCGTTAACTTTGGCCTTCCATTG	Pool 13	72	73	7.9009e-06	32	33	1.75584e-06	10	11	1.79332e-07	18	19	3.07548e-07	NA	NA	NA	NA	NA	NA	NA	NA	NA	NA	NA	NA	NA	NA	NA	158	159	8.74076e-06	62	63	3.49196e-06	NA	NA	NA	NA	NA	NA	NA	NA	NA	8	9	2.74468e-07	10	11
IVPGYDFL	ATCGTTCCAGGTTACGATTTCCTG	Pool 13	1248	1249	0.000135181	602	603	3.20839e-05	26	27	4.40178e-07	278	279	4.5161e-06	NA	NA	NA	NA	NA	NA	NA	NA	NA	NA	NA	NA	NA	NA	NA	4952	4953	0.000272283	3326	3327	0.000184409	NA	NA	NA	NA	NA	NA	NA	NA	NA	257	258	7.86807e-06	200	201
IVQGFNLL	ATTGTTCAGGGCTTTAACTTATTA	Pool 13	767	768	8.31218e-05	744	745	3.96394e-05	400	401	6.53746e-06	998	999	1.61705e-05	NA	NA	NA	NA	NA	NA	NA	NA	NA	NA	NA	NA	NA	NA	NA	2144	2145	0.000117918	1912	1913	0.000106034	NA	NA	NA	NA	NA	NA	NA	NA	NA	165	166	5.0624e-06	416	417
IVQYLPRL	ATAGTTCAATATTTACCGAGACTC	Pool 13	17141	17142	0.0018553	3914	3915	0.000208306	406	407	6.63527e-06	652	653	1.05699e-05	NA	NA	NA	NA	NA	NA	NA	NA	NA	NA	NA	NA	NA	NA	NA	2440	2441	0.00013419	6234	6235	0.000345593	NA	NA	NA	NA	NA	NA	NA	NA	NA	4894	4895	0.00014928	110	111
IVRCWKML	ATAGTACGGTGCTGGAAGATGCTA	Pool 13	448	449	4.85959e-05	48	49	2.60715e-06	8	9	1.46726e-07	178	179	2.89742e-06	NA	NA	NA	NA	NA	NA	NA	NA	NA	NA	NA	NA	NA	NA	NA	1128	1129	6.20649e-05	862	863	4.78343e-05	NA	NA	NA	NA	NA	NA	NA	NA	NA	88	89	2.71418e-06	37	38
IVRMKFLL	ATCGTTCGGATGAAATTCTTGCTG	Pool 13	NA	1	1.08231e-07	NA	1	5.32072e-08	NA	1	1.63029e-08	6	7	1.13307e-07	NA	NA	NA	NA	NA	NA	NA	NA	NA	NA	NA	NA	NA	NA	NA	NA	1	5.49733e-08	NA	1	5.5428e-08	NA	NA	NA	NA	NA	NA	NA	NA	NA	3	4	1.21986e-07	NA	1
IVSEFFIL	ATTGTGTCAGAGTTCTTTATACTG	Pool 13	444	445	4.8163e-05	616	617	3.28288e-05	214	215	3.50512e-06	286	287	4.64559e-06	NA	NA	NA	NA	NA	NA	NA	NA	NA	NA	NA	NA	NA	NA	NA	1448	1449	7.96563e-05	760	761	4.21807e-05	NA	NA	NA	NA	NA	NA	NA	NA	NA	84	85	2.59219e-06	135	136
IVSHYFPL	ATCGTGTCCCATTACTTTCCTCTG	Pool 13	1351	1352	0.000146329	30	31	1.64942e-06	22	23	3.74966e-07	6	7	1.13307e-07	NA	NA	NA	NA	NA	NA	NA	NA	NA	NA	NA	NA	NA	NA	NA	3778	3779	0.000207744	4686	4687	0.000259791	NA	NA	NA	NA	NA	NA	NA	NA	NA	9	10	3.04964e-07	218	219
IVSLVPRL	ATTGTCTCTCTGGTGCCTCGCCTC	Pool 13	98	99	1.07149e-05	NA	1	5.32072e-08	6	7	1.1412e-07	82	83	1.3435e-06	NA	NA	NA	NA	NA	NA	NA	NA	NA	NA	NA	NA	NA	NA	NA	138	139	7.64129e-06	250	251	1.39124e-05	NA	NA	NA	NA	NA	NA	NA	NA	NA	82	83	2.5312e-06	4	5
IVSVAAHL	ATTGTTTCAGTAGCAGCTCATCTG	Pool 13	353	354	3.83139e-05	20	21	1.11735e-06	8	9	1.46726e-07	42	43	6.96029e-07	NA	NA	NA	NA	NA	NA	NA	NA	NA	NA	NA	NA	NA	NA	NA	904	905	4.97508e-05	310	311	1.72381e-05	NA	NA	NA	NA	NA	NA	NA	NA	NA	4	5	1.52482e-07	9	10
IVSVFYSI	ATAGTTTCAGTCTTCTATTCAATT	Pool 13	886	887	9.60013e-05	780	781	4.15548e-05	388	389	6.34182e-06	1146	1147	1.85662e-05	NA	NA	NA	NA	NA	NA	NA	NA	NA	NA	NA	NA	NA	NA	NA	2202	2203	0.000121106	3080	3081	0.000170774	NA	NA	NA	NA	NA	NA	NA	NA	NA	229	230	7.01417e-06	223	224
IVSYIFIL	ATCGTGAGCTACATATTCATCCTC	Pool 13	625	626	6.77529e-05	1946	1947	0.000103594	4564	4565	7.44227e-05	22646	22647	0.000366581	NA	NA	NA	NA	NA	NA	NA	NA	NA	NA	NA	NA	NA	NA	NA	1808	1809	9.94467e-05	1234	1235	6.84535e-05	NA	NA	NA	NA	NA	NA	NA	NA	NA	1735	1736	5.29417e-05	3725	3726
IVTMLGNL	ATAGTTACAATGTTGGGCAATCTA	Pool 13	1566	1567	0.000169599	370	371	1.97399e-05	334	335	5.46147e-06	660	661	1.06994e-05	NA	NA	NA	NA	NA	NA	NA	NA	NA	NA	NA	NA	NA	NA	NA	5662	5663	0.000311314	2608	2609	0.000144612	NA	NA	NA	NA	NA	NA	NA	NA	NA	178	179	5.45885e-06	421	422
IVTWFMLL	ATAGTGACTTGGTTTATGCTATTG	Pool 13	1408	1409	0.000152498	406	407	2.16553e-05	1498	1499	2.4438e-05	3436	3437	5.56338e-05	NA	NA	NA	NA	NA	NA	NA	NA	NA	NA	NA	NA	NA	NA	NA	3918	3919	0.00021544	4002	4003	0.000221878	NA	NA	NA	NA	NA	NA	NA	NA	NA	1262	1263	3.85169e-05	491	492
IVVTAAFL	ATCGTCGTCACGGCGGCATTCTTA	Pool 13	28	29	3.13871e-06	NA	1	5.32072e-08	4	5	8.15144e-08	NA	1	1.61867e-08	NA	NA	NA	NA	NA	NA	NA	NA	NA	NA	NA	NA	NA	NA	NA	96	97	5.33241e-06	278	279	1.54644e-05	NA	NA	NA	NA	NA	NA	NA	NA	NA	NA	1	3.04964e-08	NA	1
IVVVFFTV	ATAGTTGTCGTTTTCTTTACAGTC	Pool 13	1461	1462	0.000158234	2152	2153	0.000114555	80	81	1.32053e-06	368	369	5.9729e-06	NA	NA	NA	NA	NA	NA	NA	NA	NA	NA	NA	NA	NA	NA	NA	2572	2573	0.000141446	2404	2405	0.000133304	NA	NA	NA	NA	NA	NA	NA	NA	NA	104	105	3.20212e-06	428	429
IVYANLKI	ATAGTCTACGCCAACCTTAAAATT	Pool 13	488	489	5.29252e-05	160	161	8.56636e-06	344	345	5.62449e-06	48	49	7.9315e-07	NA	NA	NA	NA	NA	NA	NA	NA	NA	NA	NA	NA	NA	NA	NA	1722	1723	9.4719e-05	2460	2461	0.000136408	NA	NA	NA	NA	NA	NA	NA	NA	NA	333	334	1.01858e-05	116	117
IVYCYCNG	ATAGTCTACTGCTATTGCAACGGT	Pool 13	12	13	1.40701e-06	NA	1	5.32072e-08	32	33	5.37995e-07	24	25	4.04668e-07	NA	NA	NA	NA	NA	NA	NA	NA	NA	NA	NA	NA	NA	NA	NA	50	51	2.80364e-06	32	33	1.82912e-06	NA	NA	NA	NA	NA	NA	NA	NA	NA	16	17	5.18439e-07	8	9
IVYEMGEL	ATCGTCTACGAGATGGGAGAATTA	Pool 13	NA	1	1.08231e-07	NA	1	5.32072e-08	NA	1	1.63029e-08	NA	1	1.61867e-08	NA	NA	NA	NA	NA	NA	NA	NA	NA	NA	NA	NA	NA	NA	NA	8	9	4.9476e-07	NA	1	5.5428e-08	NA	NA	NA	NA	NA	NA	NA	NA	NA	NA	1	3.04964e-08	NA	1
IVYLKQPI	ATTGTATACCTCAAGCAACCCATC	Pool 13	439	440	4.76218e-05	86	87	4.62903e-06	60	61	9.94476e-07	170	171	2.76793e-06	NA	NA	NA	NA	NA	NA	NA	NA	NA	NA	NA	NA	NA	NA	NA	864	865	4.75519e-05	822	823	4.56172e-05	NA	NA	NA	NA	NA	NA	NA	NA	NA	113	114	3.47659e-06	5	6
IVYLLEKI	ATAGTCTACTTATTAGAGAAAATC	Pool 13	1135	1136	0.000122951	676	677	3.60213e-05	1142	1143	1.86342e-05	64	65	1.05214e-06	NA	NA	NA	NA	NA	NA	NA	NA	NA	NA	NA	NA	NA	NA	NA	2746	2747	0.000151012	12972	12973	0.000719067	NA	NA	NA	NA	NA	NA	NA	NA	NA	1430	1431	4.36403e-05	566	567
IVYLLTLM	ATTGTCTACTTACTTACGCTTATG	Pool 13	359	360	3.89633e-05	172	173	9.20484e-06	2374	2375	3.87193e-05	11266	11267	0.000182376	NA	NA	NA	NA	NA	NA	NA	NA	NA	NA	NA	NA	NA	NA	NA	882	883	4.85414e-05	1320	1321	7.32203e-05	NA	NA	NA	NA	NA	NA	NA	NA	NA	10	11	3.3546e-07	32	33
IVYMLFMF	ATCGTATATATGCTTTTCATGTTC	Pool 13	5697	5698	0.000616703	2860	2861	0.000152226	798	799	1.3026e-05	10938	10939	0.000177067	NA	NA	NA	NA	NA	NA	NA	NA	NA	NA	NA	NA	NA	NA	NA	7886	7887	0.000433574	9298	9299	0.000515425	NA	NA	NA	NA	NA	NA	NA	NA	NA	2088	2089	6.3707e-05	4374	4375
IVYSVIFI	ATAGTATACTCCGTAATATTTATA	Pool 13	3972	3973	0.000430004	2054	2055	0.000109341	1072	1073	1.7493e-05	1822	1823	2.95084e-05	NA	NA	NA	NA	NA	NA	NA	NA	NA	NA	NA	NA	NA	NA	NA	8684	8685	0.000477443	13682	13683	0.000758421	NA	NA	NA	NA	NA	NA	NA	NA	NA	1019	1020	3.11063e-05	2530	2531
IVYTVVHI	ATTGTTTATACCGTGGTACATATA	Pool 13	226	227	2.45685e-05	94	95	5.05468e-06	90	91	1.48356e-06	220	221	3.57727e-06	NA	NA	NA	NA	NA	NA	NA	NA	NA	NA	NA	NA	NA	NA	NA	660	661	3.63374e-05	766	767	4.25132e-05	NA	NA	NA	NA	NA	NA	NA	NA	NA	104	105	3.20212e-06	37	38
IWCLYSEL	ATTTGGTGTTTGTACAGCGAGCTA	Pool 13	1294	1295	0.00014016	668	669	3.55956e-05	136	137	2.23349e-06	408	409	6.62037e-06	NA	NA	NA	NA	NA	NA	NA	NA	NA	NA	NA	NA	NA	NA	NA	1436	1437	7.89966e-05	1614	1615	8.95161e-05	NA	NA	NA	NA	NA	NA	NA	NA	NA	525	526	1.60411e-05	517	518
IWEFLRQL	ATATGGGAATTCTTGCGTCAGTTA	Pool 13	2402	2403	0.00026008	1260	1261	6.70943e-05	378	379	6.17879e-06	1036	1037	1.67856e-05	NA	NA	NA	NA	NA	NA	NA	NA	NA	NA	NA	NA	NA	NA	NA	4372	4373	0.000240398	3876	3877	0.000214894	NA	NA	NA	NA	NA	NA	NA	NA	NA	1749	1750	5.33687e-05	291	292
IWISYVFI	ATCTGGATTTCGTACGTGTTCATT	Pool 13	1516	1517	0.000164187	1084	1085	5.77298e-05	128	129	2.10307e-06	126	127	2.05571e-06	NA	NA	NA	NA	NA	NA	NA	NA	NA	NA	NA	NA	NA	NA	NA	2114	2115	0.000116269	3554	3555	0.000197046	NA	NA	NA	NA	NA	NA	NA	NA	NA	96	97	2.95815e-06	729	730
IWSLFNTL	ATATGGAGTCTTTTCAACACATTA	Pool 13	592	593	6.41813e-05	298	299	1.5909e-05	400	401	6.53746e-06	134	135	2.18521e-06	NA	NA	NA	NA	NA	NA	NA	NA	NA	NA	NA	NA	NA	NA	NA	1458	1459	8.0206e-05	1248	1249	6.92295e-05	NA	NA	NA	NA	NA	NA	NA	NA	NA	101	102	3.11063e-06	88	89
IWWHLLPL	ATATGGTGGCATCTTCTCCCGCTA	Pool 13	130	131	1.41783e-05	46	47	2.50074e-06	24	25	4.07572e-07	70	71	1.14926e-06	NA	NA	NA	NA	NA	NA	NA	NA	NA	NA	NA	NA	NA	NA	NA	142	143	7.86118e-06	448	449	2.48872e-05	NA	NA	NA	NA	NA	NA	NA	NA	NA	7	8	2.43971e-07	12	13
IWYAIGNV	ATTTGGTACGCAATCGGCAACGTA	Pool 13	731	732	7.92254e-05	692	693	3.68726e-05	626	627	1.02219e-05	2120	2121	3.4332e-05	NA	NA	NA	NA	NA	NA	NA	NA	NA	NA	NA	NA	NA	NA	NA	2794	2795	0.00015365	1616	1617	8.9627e-05	NA	NA	NA	NA	NA	NA	NA	NA	NA	2301	2302	7.02027e-05	838	839
IWYVIGKM	ATATGGTACGTCATAGGCAAAATG	Pool 13	363	364	3.93963e-05	34	35	1.86225e-06	30	31	5.05389e-07	28	29	4.69415e-07	NA	NA	NA	NA	NA	NA	NA	NA	NA	NA	NA	NA	NA	NA	NA	438	439	2.41333e-05	254	255	1.41341e-05	NA	NA	NA	NA	NA	NA	NA	NA	NA	33	34	1.03688e-06	13	14
IYARISML	ATATATGCACGAATCTCGATGCTC	Pool 13	NA	1	1.08231e-07	NA	1	5.32072e-08	NA	1	1.63029e-08	NA	1	1.61867e-08	NA	NA	NA	NA	NA	NA	NA	NA	NA	NA	NA	NA	NA	NA	NA	NA	1	5.49733e-08	NA	1	5.5428e-08	NA	NA	NA	NA	NA	NA	NA	NA	NA	NA	1	3.04964e-08	NA	1
IYDLFVPV	ATATACGATTTATTTGTTCCGGTG	Pool 13	509	510	5.5198e-05	494	495	2.63376e-05	386	387	6.30922e-06	242	243	3.93337e-06	NA	NA	NA	NA	NA	NA	NA	NA	NA	NA	NA	NA	NA	NA	NA	1786	1787	9.82373e-05	1010	1011	5.60377e-05	NA	NA	NA	NA	NA	NA	NA	NA	NA	1093	1094	3.33631e-05	188	189
IYDRYLFF	ATCTATGACCGGTATCTATTCTTT	Pool 13	1435	1436	0.00015542	306	307	1.63346e-05	284	285	4.64632e-06	4460	4461	7.2209e-05	NA	NA	NA	NA	NA	NA	NA	NA	NA	NA	NA	NA	NA	NA	NA	5156	5157	0.000283497	3540	3541	0.00019627	NA	NA	NA	NA	NA	NA	NA	NA	NA	704	705	2.15e-05	186	187
IYEAHIRL	ATCTACGAAGCACATATTCGACTT	Pool 13	385	386	4.17773e-05	638	639	3.39994e-05	8	9	1.46726e-07	830	831	1.34512e-05	NA	NA	NA	NA	NA	NA	NA	NA	NA	NA	NA	NA	NA	NA	NA	2112	2113	0.000116159	916	917	5.08274e-05	NA	NA	NA	NA	NA	NA	NA	NA	NA	389	390	1.18936e-05	2136	2137
IYFLVPAI	ATCTACTTTCTTGTGCCTGCTATA	Pool 13	4303	4304	0.000465828	17722	17723	0.000942991	51538	51539	0.000840234	5696	5697	9.22158e-05	NA	NA	NA	NA	NA	NA	NA	NA	NA	NA	NA	NA	NA	NA	NA	8752	8753	0.000481181	57994	57995	0.00321454	NA	NA	NA	NA	NA	NA	NA	NA	NA	11542	11543	0.00035202	42669	42670
IYHFYFHL	ATATACCACTTCTATTTTCACCTC	Pool 13	676	677	7.32727e-05	88	89	4.73544e-06	228	229	3.73336e-06	26	27	4.37042e-07	NA	NA	NA	NA	NA	NA	NA	NA	NA	NA	NA	NA	NA	NA	NA	1242	1243	6.83318e-05	878	879	4.87212e-05	NA	NA	NA	NA	NA	NA	NA	NA	NA	178	179	5.45885e-06	100	101
IYHFYHNS	ATATATCATTTCTACCATAATTCG	Pool 13	1280	1281	0.000138645	460	461	2.45285e-05	94970	94971	0.0015483	452	453	7.33259e-06	NA	NA	NA	NA	NA	NA	NA	NA	NA	NA	NA	NA	NA	NA	NA	1960	1961	0.000107803	3194	3195	0.000177092	NA	NA	NA	NA	NA	NA	NA	NA	NA	408	409	1.2473e-05	165	166
IYHWWQAV	ATATATCACTGGTGGCAGGCGGTC	Pool 13	33	34	3.67987e-06	4	5	2.66036e-07	NA	1	1.63029e-08	NA	1	1.61867e-08	NA	NA	NA	NA	NA	NA	NA	NA	NA	NA	NA	NA	NA	NA	NA	84	85	4.67273e-06	62	63	3.49196e-06	NA	NA	NA	NA	NA	NA	NA	NA	NA	NA	1	3.04964e-08	NA	1
IYIHGHFL	ATATATATTCATGGGCACTTCTTA	Pool 13	1692	1693	0.000183236	1716	1717	9.13567e-05	1594	1595	2.60031e-05	2836	2837	4.59217e-05	NA	NA	NA	NA	NA	NA	NA	NA	NA	NA	NA	NA	NA	NA	NA	3758	3759	0.000206645	4010	4011	0.000222322	NA	NA	NA	NA	NA	NA	NA	NA	NA	258	259	7.89857e-06	317	318
IYIHKNFL	ATTTATATCCATAAGAACTTCCTC	Pool 13	898	899	9.73001e-05	414	415	2.2081e-05	316	317	5.16801e-06	1160	1161	1.87928e-05	NA	NA	NA	NA	NA	NA	NA	NA	NA	NA	NA	NA	NA	NA	NA	1832	1833	0.000100766	2292	2293	0.000127096	NA	NA	NA	NA	NA	NA	NA	NA	NA	327	328	1.00028e-05	570	571
IYISVGFL	ATATATATTTCAGTTGGCTTCCTG	Pool 13	251	252	2.72743e-05	72	73	3.88412e-06	2	3	4.89086e-08	NA	1	1.61867e-08	NA	NA	NA	NA	NA	NA	NA	NA	NA	NA	NA	NA	NA	NA	NA	526	527	2.89709e-05	614	615	3.40882e-05	NA	NA	NA	NA	NA	NA	NA	NA	NA	18	19	5.79431e-07	1	2
IYLFLAAF	ATCTATCTTTTCCTGGCCGCCTTC	Pool 13	1087	1088	0.000117756	570	571	3.03813e-05	182	183	2.98343e-06	292	293	4.74271e-06	NA	NA	NA	NA	NA	NA	NA	NA	NA	NA	NA	NA	NA	NA	NA	2776	2777	0.000152661	2110	2111	0.000117008	NA	NA	NA	NA	NA	NA	NA	NA	NA	704	705	2.15e-05	459	460
IYLHNPNI	ATATATCTGCATAATCCAAATATA	Pool 13	518	519	5.61721e-05	1032	1033	5.4963e-05	22	23	3.74966e-07	276	277	4.48372e-06	NA	NA	NA	NA	NA	NA	NA	NA	NA	NA	NA	NA	NA	NA	NA	1396	1397	7.67977e-05	2340	2341	0.000129757	NA	NA	NA	NA	NA	NA	NA	NA	NA	23	24	7.31913e-07	62	63
IYLNHTML	ATCTATTTAAATCATACCATGCTA	Pool 13	256	257	2.78155e-05	206	207	1.10139e-05	780	781	1.27326e-05	16	17	2.75174e-07	NA	NA	NA	NA	NA	NA	NA	NA	NA	NA	NA	NA	NA	NA	NA	954	955	5.24995e-05	1046	1047	5.80331e-05	NA	NA	NA	NA	NA	NA	NA	NA	NA	879	880	2.68368e-05	80	81
IYLTNLRL	ATTTATTTAACAAACCTCCGCTTA	Pool 13	1554	1555	0.0001683	1372	1373	7.30535e-05	678	679	1.10697e-05	2382	2383	3.8573e-05	NA	NA	NA	NA	NA	NA	NA	NA	NA	NA	NA	NA	NA	NA	NA	3786	3787	0.000208184	2208	2209	0.00012244	NA	NA	NA	NA	NA	NA	NA	NA	NA	540	541	1.64985e-05	831	832
IYLVTATM	ATATATCTCGTAACCGCTACGATG	Pool 13	78	79	8.55029e-06	16	17	9.04522e-07	24	25	4.07572e-07	NA	1	1.61867e-08	NA	NA	NA	NA	NA	NA	NA	NA	NA	NA	NA	NA	NA	NA	NA	562	563	3.095e-05	520	521	2.8878e-05	NA	NA	NA	NA	NA	NA	NA	NA	NA	55	56	1.7078e-06	NA	1
IYPMETRL	ATCTATCCAATGGAGACTCGTCTG	Pool 13	1014	1015	0.000109855	450	451	2.39964e-05	116	117	1.90744e-06	196	197	3.18879e-06	NA	NA	NA	NA	NA	NA	NA	NA	NA	NA	NA	NA	NA	NA	NA	2124	2125	0.000116818	1932	1933	0.000107142	NA	NA	NA	NA	NA	NA	NA	NA	NA	21	22	6.70921e-07	94	95
IYPYLLQI	ATCTACCCGTACCTACTTCAGATA	Pool 13	975	976	0.000105634	1658	1659	8.82707e-05	1046	1047	1.70691e-05	13952	13953	0.000225853	NA	NA	NA	NA	NA	NA	NA	NA	NA	NA	NA	NA	NA	NA	NA	5244	5245	0.000288335	1528	1529	8.47493e-05	NA	NA	NA	NA	NA	NA	NA	NA	NA	1074	1075	3.27836e-05	3633	3634
IYQMLKNL	ATCTATCAGATGCTTAAGAACTTA	Pool 13	295	296	3.20365e-05	1162	1163	6.188e-05	1128	1129	1.8406e-05	28	29	4.69415e-07	NA	NA	NA	NA	NA	NA	NA	NA	NA	NA	NA	NA	NA	NA	NA	644	645	3.54578e-05	762	763	4.22915e-05	NA	NA	NA	NA	NA	NA	NA	NA	NA	4	5	1.52482e-07	129	130
[truncated: 8,513 more rows]
[truncated: 4 more columns]
