# Supplementary material for: Rejection of immunogenic tumor clones is limited by clonal fraction
Source: eLife. 2018 Nov 30;7:e41090. doi: 10.7554/eLife.41090 (PMC6269121; doi:10.7554/eLife.41090)
Supplement: Supplementary file 1. [file elife-41090-supp1.xlsx]

## Sheet: Sheet1
Supplementary file 1. Oligonucleotide sequences.
Cloning Primers
NAME	SEQUENCE
T7_SfiI Primer	CGACTCACTATAGGGCCGTATTGGCC	Oligonucleotide template for cloning individual minigenes: 5’- GGCCGTATTGGCCCCGCCACCTGTGAGCGGG…[27-30nt insert]…TAAGGCCAAACAGGCC-3’
T3_SfiI Primer	AGTGATTTCCGGCCTGTTTGGCC
WT Library Forward Primer	CATGTTGCCCTGAGGCACAG	Oligonucleotide template for cloning pooled libraries of minigenes 5’—[pool specific F primer]—GGCCGTATTGGCCCCGCCACCTGTGAGCGGG—[27-30nt insert]—TAAGGCCAAACAGGCC—[pool specific R primer]—3’.
WT Library Reverse Primer	CGGATCGTCACGCTAGGTAC
Mutant Library Forward Primer	GGTCGTCGCATCACAATGCG
Mutant Library Reverse Primer	CGGATCGTCACGCTAGGTAC
Illumina P5 Primer	AATGATACGGCGACCACCGAGATCT
Illumina Barcoded P7 primer	CAAGCAGAAGACGGCATACGAGATXXXXXXGTGACTGGAGTTCAGACGTGTGCTCTTCCGATC
Custom Sequencing Primer for Illumina	ACGCTCTTCCGATCTTTGGCCTGTTTGGCCTTA
Outer PCR Forward	AATGATACGGCGACCACCGAGATCT
Outer PCR Reverse	GTGACTGGAGTTCAGACGTGTGCTCTTCCGATC
Inner PCR Forward	GCCACCTGTGAGCGGG
Inner PCR Reverse	TCTTTGGCCTGTTTGGCCTTA
PresentER Constructs
NAME	OLIGONUCLEOTIDE CORRESPONDING TO PEPTIDE	ENCODED PEPTIDE
Chicken ovalbumin 257-264	AGCATCATCAACTTCGAGAAGCTG	SIINFEKL
Scrambled chicken ovalbumin 257-264	TTCGAGAAGATCATCCTGAGCAAC	FEKIILSN
Mouse Pedf 271-279	ATGAGCATCATCTTCTTCCTGCCCCTG	MSIIFFLPL
Mouse p68 547-554	AGCAATTTTGTGAGTGCGGGAATC	SNFVSAGI
Mouse p68 547-554 S551F	AGCAACTTCGTGTTCGCCGGCATC	SNFVFAGI
Synthetic	AGTATTTACAGATACTATGGGTTG	SIYRYYGL
Mouse Ndufa4 (dEV8) 54-61	GAGCAGTACAAATTCTATTCCGTC	EQYKFYSV
Mouse Tyrp1 (gp75) 222-229	ACCTGGCACAGATACCACCTCCTT	TWHRYHLL
Mouse Tyrp1 (gp75) 222-229 W223A,H224Y	ACTGCTTATAGATATCATCTCCTT	TAYRYHLL
qPCR Primers
GENE	FORWARD PRIMER	REVERSE PRIMER
Mouse Tap2	CACAGCCACCACAAGGAAGA	CAGTTCCTGTCCAGTCGCAT
Mouse Gapdh	TGATGGGTGTGAACCACGAG	TCTTGCTCAGTGTCCTTGCT
