# Supplementary material for: Rejection of immunogenic tumor clones is limited by clonal fraction
Source: eLife. 2018 Nov 30;7:e41090. doi: 10.7554/eLife.41090 (PMC6269121; doi:10.7554/eLife.41090)
Supplement: Supplementary file 2. [file elife-41090-supp2.xlsx]

## Sheet: library_metadata.txt
pool	ic50	mutation	peptide	peptide origin
WT	27.8	NA	FIYQYWKL	sp|Q6ZQF7|JADE2_MOUSE|426-433,tr|A2AA59|A2AA59_MOUSE|426-433
WT	118.5	NA	TIYLEPTL	sp|Q6W049|OL688_MOUSE|54-61,tr|F6WFG0|F6WFG0_MOUSE|47-54
WT	300	NA	IPFYIQAL	sp|A8C756|THADA_MOUSE|1155-1162
WT	78.1	NA	FGFFTPLL	sp|O54689|CCR6_MOUSE|213-220
WT	133.7	NA	RNYFRSQI	sp|P41216|ACSL1_MOUSE|683-690,tr|D3Z041|D3Z041_MOUSE|683-690
WT	63.4	NA	ASSPFSTL	sp|Q6A044|F1891_MOUSE|271-278,tr|D3YX96|D3YX96_MOUSE|175-182
WT	297	NA	ASWTCASV	tr|F6ZBI5|F6ZBI5_MOUSE|33-40
WT	249.9	NA	VTKRCVPL	sp|Q8BPP5|LYPD6_MOUSE|92-99,tr|A2AQT4|A2AQT4_MOUSE|92-99
WT	458.7	NA	TMFCVPCM	tr|Q3KPC7|Q3KPC7_MOUSE|252-259
WT	268	NA	IFPYEMLM	sp|Q8K4G5|ABLM1_MOUSE|798-805,tr|E9Q9D2|E9Q9D2_MOUSE|391-398,tr|E9QK41|E9QK41_MOUSE|798-805,tr|E9Q030|E9Q030_MOUSE|482-489,tr|E9Q9C2|E9Q9C2_MOUSE|714-721,tr|E9Q9C7|E9Q9C7_MOUSE|605-612,tr|E9Q9C1|E9Q9C1_MOUSE|681-688,tr|E9Q9C4|E9Q9C4_MOUSE|619-626,tr|E9Q9Q7|E9Q9Q7_MOUSE|337-344,tr|E9Q9D1|E9Q9D1_MOUSE|363-370,tr|E9Q9C0|E9Q9C0_MOUSE|651-658
WT	409.4	NA	RAFTRTFI	sp|Q99JX7|NXF1_MOUSE|510-517
WT	14.5	NA	ISLSHQNL	tr|F7B0R9|F7B0R9_MOUSE|598-605,tr|E9Q3M9|E9Q3M9_MOUSE|1122-1129
WT	164.8	NA	VNKMYHGI	sp|O35386|PAHX_MOUSE|229-236
WT	393.3	NA	IVLSGAHI	sp|Q60575|KIF1B_MOUSE|569-576,tr|A2AH75|A2AH75_MOUSE|523-530
WT	89.3	NA	SNFRAEHL	sp|P10820|PERF_MOUSE|419-426
WT	476.1	NA	MNFKEAII	sp|Q8R4P5|TMC1_MOUSE|334-341
WT	81.6	NA	LFFFPLPL	sp|Q8VBV9|O51E2_MOUSE|153-160
WT	28.5	NA	SATTFINL	sp|Q04519|ASM_MOUSE|482-489
WT	428.1	NA	ALVVFAYI	sp|Q6VV64|KCNKI_MOUSE|299-306
WT	273.8	NA	TAFLNALV	sp|O08759|UBE3A_MOUSE|249-256,tr|A0A0J9YUK0|A0A0J9YUK0_MOUSE|249-256
WT	106	NA	VLNVYLRL	sp|P60755|MDGA2_MOUSE|843-850,tr|B2RQF5|B2RQF5_MOUSE|850-857
WT	60.5	NA	LVLRFGEM	tr|E9Q152|E9Q152_MOUSE|203-210
WT	237.9	NA	TFYFTMYI	sp|Q9CPV9|P2Y12_MOUSE|109-116,tr|A0A0G2JGU7|A0A0G2JGU7_MOUSE|109-116
WT	137.7	NA	STLVLNRL	sp|P63038|CH60_MOUSE|284-291
WT	437.8	NA	LALEAAQL	sp|O35906|SPIB_MOUSE|2-9,tr|A0A0X1KG64|A0A0X1KG64_MOUSE|2-9
WT	18.5	NA	QSLHFFYL	tr|E9PZQ1|E9PZQ1_MOUSE|59-66,tr|D3Z3B3|D3Z3B3_MOUSE|59-66,tr|D3YZ76|D3YZ76_MOUSE|59-66,tr|G3X9F7|G3X9F7_MOUSE|59-66
WT	465.2	NA	KFLNFPPF	tr|D3Z1I7|D3Z1I7_MOUSE|97-104,tr|J3QPP7|J3QPP7_MOUSE|176-183,tr|J3QPJ9|J3QPJ9_MOUSE|97-104
WT	165.3	NA	TYMFHLAV	sp|P35383|P2RY2_MOUSE|70-77,tr|A0A0R4J289|A0A0R4J289_MOUSE|70-77
WT	19.4	NA	VAAFHAFL	sp|P97428|RGS16_MOUSE|75-82
WT	136.3	NA	ITMPLVLL	tr|D3Z660|D3Z660_MOUSE|74-81
WT	178.5	NA	VNLILPLM	sp|Q9ESJ0|XPO4_MOUSE|959-966,tr|A0A0R4J254|A0A0R4J254_MOUSE|959-966
WT	282.7	NA	HLLHFLPL	tr|E9Q2M1|E9Q2M1_MOUSE|187-194,tr|E9PW76|E9PW76_MOUSE|187-194
WT	94.1	NA	VTFPGIKL	sp|Q8CGA3|LAT4_MOUSE|192-199
WT	441.6	NA	ISAQIGTL	tr|E9PWW0|E9PWW0_MOUSE|156-163,tr|E9Q3A5|E9Q3A5_MOUSE|159-166
WT	456.5	NA	VSILSLWL	tr|D3Z660|D3Z660_MOUSE|3-10
WT	443.4	NA	RVYVADSL	sp|Q8VHL1|SETD7_MOUSE|215-222
WT	323.7	NA	ITVFGNLL	tr|Q9EP55|Q9EP55_MOUSE|37-44
WT	230.6	NA	SVFDAREL	sp|Q6I6G8|HECW2_MOUSE|1445-1452,sp|Q8K4P8|HECW1_MOUSE|1471-1478
WT	119.4	NA	VTFITKVL	sp|Q8CGB6|TNS2_MOUSE|1388-1395
WT	154	NA	KSHDFWLL	sp|Q9D9M2|UBP12_MOUSE|323-330
WT	43.7	NA	SAPEYVFL	sp|Q7TNB8|SBNO2_MOUSE|842-849
WT	10.7	NA	RSLVFLNL	sp|Q6B966|NAL14_MOUSE|687-694,tr|A0A0N4SW95|A0A0N4SW95_MOUSE|28-35
WT	407.5	NA	CSLFMRNI	sp|Q99MR6|SRRT_MOUSE|420-427,tr|A0A0G2JDF8|A0A0G2JDF8_MOUSE|64-71
WT	172.2	NA	SVYDYDTF	sp|Q69ZN7|MYOF_MOUSE|1608-1615,tr|E9Q390|E9Q390_MOUSE|1608-1615
WT	107.1	NA	WNLRFPNI	sp|Q8BHE0|PRR11_MOUSE|62-69
WT	170.1	NA	IAYKVLEV	sp|Q9CX63|CQ099_MOUSE|27-34
WT	328.3	NA	VITALYML	tr|Q7TRN3|Q7TRN3_MOUSE|30-37
WT	136.8	NA	VNMSSVAL	sp|P0CW70|D19L2_MOUSE|390-397
WT	194.7	NA	REYFYFEL	sp|Q80W00|PP1RA_MOUSE|408-415
WT	172.1	NA	LSVLAFAL	sp|P30557|PE2R3_MOUSE|159-166,tr|G3UYL9|G3UYL9_MOUSE|160-167,tr|Q6PDF2|Q6PDF2_MOUSE|160-167
WT	213.6	NA	LVYQYSYS	sp|Q8CFW1|ANO2_MOUSE|830-837
WT	86.7	NA	SMGSFISL	sp|P00397|COX1_MOUSE|455-462
WT	36.3	NA	IIYMTILL	sp|O88455|DHCR7_MOUSE|429-436,tr|A0A140LIT2|A0A140LIT2_MOUSE|432-439
WT	107.6	NA	RNFVKVLL	sp|O54951|SEM6B_MOUSE|128-135
WT	280	NA	VVFELLEF	sp|A2ARJ3|TM236_MOUSE|10-17
WT	238.9	NA	IICSFRRI	sp|P47743|GRM8_MOUSE|646-653,tr|Q05BD6|Q05BD6_MOUSE|646-653
WT	243.4	NA	CGYQSTML	sp|Q3UPC7|K0825_MOUSE|242-249
WT	17	NA	IGYFSLFL	sp|Q8BVL3|SNX17_MOUSE|157-164,tr|D3Z7S9|D3Z7S9_MOUSE|75-82
WT	77.1	NA	KTMAFPDL	sp|Q09M05|CBPC4_MOUSE|481-488,tr|D3Z1M2|D3Z1M2_MOUSE|527-534
WT	28.3	NA	VAYHLSKM	sp|Q7TSQ8|PDPR_MOUSE|56-63,tr|D3Z443|D3Z443_MOUSE|56-63,tr|D6RD07|D6RD07_MOUSE|56-63
WT	277.2	NA	TQYFLFAF	tr|Q7TQY8|Q7TQY8_MOUSE|23-30
WT	299.5	NA	NIYTYPCI	sp|Q9D8U7|DTWD1_MOUSE|120-127
WT	193.9	NA	VSQLLSNI	sp|Q9ES00|UBE4B_MOUSE|324-331,tr|G3UZD6|G3UZD6_MOUSE|324-331,tr|G3UZM6|G3UZM6_MOUSE|324-331
WT	48.4	NA	RGLRYLLL	sp|Q6P3Y9|PONL1_MOUSE|304-311,tr|A0A0R4J142|A0A0R4J142_MOUSE|304-311
WT	89.6	NA	QQYFHRLL	sp|Q6PIJ4|NFRKB_MOUSE|140-147,tr|D6RD05|D6RD05_MOUSE|140-147,tr|D6RHP5|D6RHP5_MOUSE|140-147
WT	232.3	NA	RALFLAVL	sp|A2ANU3|SYNG1_MOUSE|225-232
WT	448.2	NA	ILYDIHYI	sp|Q60675|LAMA2_MOUSE|1328-1335,tr|A0A087WRP2|A0A087WRP2_MOUSE|1328-1335
WT	426.9	NA	STRNYPQV	sp|P11531|DMD_MOUSE|147-154
WT	46.5	NA	AIIAFKTL	sp|Q8K4I3|ARHG6_MOUSE|406-413,tr|H3BJ53|H3BJ53_MOUSE|253-260,tr|F6WMJ3|F6WMJ3_MOUSE|430-437,tr|A2AFJ8|A2AFJ8_MOUSE|167-174,tr|H3BKQ0|H3BKQ0_MOUSE|11-18
WT	396.5	NA	LTLTLVAL	sp|Q6RUT7|CSMT1_MOUSE|84-91
WT	157.4	NA	FAFVHVSF	sp|P35761|TTK_MOUSE|138-145,tr|Q3TPW2|Q3TPW2_MOUSE|138-145,tr|A0A087WPS8|A0A087WPS8_MOUSE|138-145
WT	74.8	NA	TARFYAKV	sp|Q8K3K7|PLCB_MOUSE|23-30
WT	320.7	NA	FSSPYEHL	sp|Q6PDJ1|CAHD1_MOUSE|676-683,tr|Z4YK18|Z4YK18_MOUSE|676-683
WT	173.2	NA	VFPYISVM	sp|Q9DBH5|LMAN2_MOUSE|175-182
WT	191.1	NA	LQRMFERL	sp|Q6VNB8|WDFY3_MOUSE|923-930,tr|G3UYW1|G3UYW1_MOUSE|923-930,tr|G3UY81|G3UY81_MOUSE|63-70
WT	96.1	NA	IGYDIYNI	tr|L7N2A1|L7N2A1_MOUSE|101-108,tr|K7N6V2|K7N6V2_MOUSE|101-108,tr|L7N2B8|L7N2B8_MOUSE|101-108
WT	256.5	NA	QLYMVHHL	tr|Q7TMG8|Q7TMG8_MOUSE|224-231
WT	438.5	NA	LSFCQSQF	sp|Q80XC6|NRDE2_MOUSE|431-438
WT	34.4	NA	VAQLFIFL	tr|Q7TQU5|Q7TQU5_MOUSE|98-105,tr|Q8VFA7|Q8VFA7_MOUSE|98-105,tr|Q8VFA9|Q8VFA9_MOUSE|98-105,tr|K9J6X0|K9J6X0_MOUSE|98-105
WT	22.9	NA	QSYLLPPL	sp|Q9JHR9|NRIP2_MOUSE|262-269
WT	193.2	NA	ILLFLSFL	tr|Q8VGL2|Q8VGL2_MOUSE|22-29
WT	212.7	NA	VVFAQNSV	tr|E9PZQ1|E9PZQ1_MOUSE|1304-1311,tr|G3X9F7|G3X9F7_MOUSE|1303-1310
WT	172.4	NA	STFPIPPV	sp|A2RTF1|CTSRB_MOUSE|758-765
WT	105.5	NA	ISMTVWGL	tr|Q9EQR4|Q9EQR4_MOUSE|886-893
WT	350.5	NA	LSMTGFLL	sp|Q9JKT4|TR105_MOUSE|41-48
WT	208.3	NA	AGVRYLDL	sp|Q8CHS4|PLCX1_MOUSE|120-127,tr|G3X9J3|G3X9J3_MOUSE|132-139,tr|D3Z5Z4|D3Z5Z4_MOUSE|82-89,tr|D3Z2L0|D3Z2L0_MOUSE|82-89
WT	8.7	NA	KGYRFIFL	sp|P59016|VP33B_MOUSE|591-598
WT	311.2	NA	AGWVVGSL	sp|Q80TY5|VP13B_MOUSE|3639-3646,tr|E9QKX5|E9QKX5_MOUSE|3619-3626
WT	95.8	NA	KVANFSNM	sp|P40201|CHD1_MOUSE|1018-1025,tr|Q8C7Q2|Q8C7Q2_MOUSE|1018-1025,tr|G3V014|G3V014_MOUSE|403-410
WT	251.2	NA	SSYELDVL	sp|Q3UK78|PCGF5_MOUSE|188-195
WT	70.7	NA	LTLVYFSI	sp|O70576|STAG3_MOUSE|761-768
WT	60.1	NA	RVFHRIHL	sp|O35084|CP27B_MOUSE|10-17,tr|E9Q3C2|E9Q3C2_MOUSE|10-17
WT	22.2	NA	TQMTFLRL	sp|Q3U962|CO5A2_MOUSE|1383-1390
WT	140.8	NA	CTYDYLFV	sp|P60882|MEGF8_MOUSE|81-88
WT	246.9	NA	GFLAFTQL	tr|D4AFX7|D4AFX7_MOUSE|441-448,tr|G3X922|G3X922_MOUSE|441-448
WT	359.8	NA	LLKNFLRL	sp|Q6ZQK0|CNDD3_MOUSE|220-227,tr|Q80W41|Q80W41_MOUSE|220-227,tr|K4DI67|K4DI67_MOUSE|220-227
WT	53.8	NA	RAVLYMFL	tr|E9PY60|E9PY60_MOUSE|179-186
WT	109.9	NA	MALTWAYV	tr|M0QWR8|M0QWR8_MOUSE|24-31,tr|L7N251|L7N251_MOUSE|4-11
WT	140.8	NA	ITLSLLLL	sp|Q3UQ22|NET5_MOUSE|21-28,tr|S4R1A5|S4R1A5_MOUSE|21-28
WT	168.3	NA	VNHVCNPL	sp|Q01279|EGFR_MOUSE|502-509,tr|Q9WVF5|Q9WVF5_MOUSE|502-509
WT	108.5	NA	KNLSFVDL	sp|Q60894|OLF12_MOUSE|71-78,tr|E9PYK6|E9PYK6_MOUSE|71-78,tr|Q8VFC4|Q8VFC4_MOUSE|71-78,tr|Q8VFC5|Q8VFC5_MOUSE|71-78
WT	484.6	NA	FPSYYLYL	sp|P46686|TULP2_MOUSE|338-345,tr|D3Z0R4|D3Z0R4_MOUSE|226-233
WT	298.2	NA	VLIILSLL	sp|Q60590|A1AG1_MOUSE|6-13
WT	16.3	NA	ATLDYMHL	sp|O54887|TSKS_MOUSE|538-545
WT	177.7	NA	LIFSVLYL	sp|Q6UJY2|SL9C1_MOUSE|268-275,tr|M0QW97|M0QW97_MOUSE|240-247
WT	237.7	NA	SSFKKLYF	sp|Q6PFQ7|RASL2_MOUSE|586-593,tr|F6W8M5|F6W8M5_MOUSE|15-22
WT	79.5	NA	VSFRFMSQ	sp|Q6P9K9|NRX3A_MOUSE|709-716,tr|E9Q2X2|E9Q2X2_MOUSE|709-716,tr|A0A087WPQ9|A0A087WPQ9_MOUSE|336-343
WT	138.1	NA	VMNNYFGI	tr|F6UUZ3|F6UUZ3_MOUSE|647-654,tr|D3YXJ0|D3YXJ0_MOUSE|762-769,tr|E9Q7N4|E9Q7N4_MOUSE|703-710,tr|E9PUQ8|E9PUQ8_MOUSE|765-772
WT	20.9	NA	VVLRFPKI	sp|Q8C7V8|CC134_MOUSE|118-125
WT	458.3	NA	AGRRYLGI	sp|Q8VC12|HUTU_MOUSE|229-236,tr|Q3UEL5|Q3UEL5_MOUSE|229-236
WT	239.4	NA	SYWPFGSF	sp|O08858|SSR5_MOUSE|100-107
WT	68.9	NA	AVYAALGL	sp|O35954|PITM1_MOUSE|1129-1136
WT	56.2	NA	VKLLFQNL	sp|Q925E0|SNTG2_MOUSE|481-488
WT	2.7	NA	LAYLFAQL	sp|Q711T7|NADE_MOUSE|492-499,tr|G5E8V4|G5E8V4_MOUSE|492-499
WT	55.4	NA	INEAYAAL	tr|Q80X81|Q80X81_MOUSE|320-327
WT	225.5	NA	SVNFQTRL	tr|Q9DAV6|Q9DAV6_MOUSE|152-159
WT	350.9	NA	AYINMVPL	tr|D3Z1K9|D3Z1K9_MOUSE|342-349,tr|D3YVL2|D3YVL2_MOUSE|342-349,tr|D3Z4F0|D3Z4F0_MOUSE|340-347,tr|E9Q7X8|E9Q7X8_MOUSE|342-349
WT	145.5	NA	VALHLFSI	sp|Q0P5V9|S45A4_MOUSE|247-254,tr|F7BEQ1|F7BEQ1_MOUSE|183-190,tr|F6Z9M3|F6Z9M3_MOUSE|125-132
WT	251.4	NA	MMFPISQF	sp|Q8K3H0|DP13A_MOUSE|111-118
WT	151.7	NA	KIANFSNI	sp|Q7M711|TR113_MOUSE|110-117
WT	429.7	NA	RLFCVRSL	tr|B1AT64|B1AT64_MOUSE|284-291
WT	302	NA	TSILLLFL	sp|Q9D882|CJ035_MOUSE|89-96,tr|D3Z7G3|D3Z7G3_MOUSE|89-96,tr|D3YYX8|D3YYX8_MOUSE|89-96,tr|F8WHN9|F8WHN9_MOUSE|69-76,tr|D3Z2E9|D3Z2E9_MOUSE|112-119
WT	29.5	NA	SMFVLYLL	sp|Q8R314|S35F5_MOUSE|109-116,tr|A0A087WP59|A0A087WP59_MOUSE|131-138
WT	98.4	NA	ISVLVSAL	sp|Q6DI86|FAKD1_MOUSE|402-409
WT	304.4	NA	NGFEYMMF	sp|Q9DBD0|ICA_MOUSE|633-640,tr|D3YY36|D3YY36_MOUSE|555-562,tr|F6W4D3|F6W4D3_MOUSE|201-208
WT	81.6	NA	SQVSYPHL	sp|Q62137|JAK3_MOUSE|573-580,tr|A0A0R4J0R7|A0A0R4J0R7_MOUSE|573-580
WT	178.8	NA	VFIFSAVI	tr|L7N1Y8|L7N1Y8_MOUSE|198-205
WT	204.1	NA	SDFVFVVL	sp|Q07832|PLK1_MOUSE|123-130,tr|A0A0U1RNM9|A0A0U1RNM9_MOUSE|123-130,tr|A0A0U1RQ54|A0A0U1RQ54_MOUSE|111-118
WT	13.7	NA	NTYFHMAL	sp|Q99MZ6|MYO7B_MOUSE|2058-2065
WT	106.3	NA	LGYQAAVL	sp|Q00175|PRGR_MOUSE|513-520,tr|E9QPW3|E9QPW3_MOUSE|351-358,tr|A6H6A5|A6H6A5_MOUSE|516-523
WT	289	NA	VVPLGSPL	sp|Q9D3I6|KRA71_MOUSE|33-40
WT	23.7	NA	IVYEMGEL	sp|Q60759|GCDH_MOUSE|96-103,tr|A0A0A0MQ68|A0A0A0MQ68_MOUSE|105-112
WT	433.7	NA	IFFLVPQV	sp|Q61139|PCSK7_MOUSE|27-34
WT	404	NA	AGWAQAVL	sp|O08760|OGG1_MOUSE|311-318
WT	201.6	NA	KAFARNTL	tr|A0A087WQ98|A0A087WQ98_MOUSE|525-532,tr|A2ANU7|A2ANU7_MOUSE|418-425,tr|A2AQA0|A2AQA0_MOUSE|582-589
WT	428	NA	GLSHFAAL	sp|Q9CYF5|WBS16_MOUSE|399-406
WT	67	NA	VLRSFRLL	sp|Q62205|SCN9A_MOUSE|832-839,sp|Q9ER60|SCN4A_MOUSE|661-668,sp|Q9WTU3|SCN8A_MOUSE|840-847,sp|Q9JJV9|SCN5A_MOUSE|806-813,tr|B1AYL0|B1AYL0_MOUSE|821-828,tr|E9PW82|E9PW82_MOUSE|821-828,tr|K3W4N7|K3W4N7_MOUSE|806-813,tr|A0A0R4J1M7|A0A0R4J1M7_MOUSE|806-813,tr|A2APX7|A2APX7_MOUSE|829-836,tr|A2APX6|A2APX6_MOUSE|846-853,tr|F6U329|F6U329_MOUSE|840-847,tr|G3X8T7|G3X8T7_MOUSE|661-668,tr|A2ASI5|A2ASI5_MOUSE|…
WT	449	NA	IFRLAFRM	sp|Q8K3F2|MMP21_MOUSE|196-203,tr|Q3KP74|Q3KP74_MOUSE|196-203
WT	274	NA	FTFFLSLF	tr|Q3V0L9|Q3V0L9_MOUSE|64-71
WT	41.1	NA	SNFPLNRL	tr|E9QPN6|E9QPN6_MOUSE|13-20
WT	46.6	NA	RSYKHSAV	sp|Q8C2S0|UBP44_MOUSE|318-325,tr|A0A0A0MQB2|A0A0A0MQB2_MOUSE|271-278
WT	165.3	NA	VFNHFADV	sp|Q3TBL6|TP8L3_MOUSE|164-171
WT	473.1	NA	KSHKLSML	sp|Q8VDN4|CCD92_MOUSE|120-127,tr|D3YUR9|D3YUR9_MOUSE|120-127
WT	126.8	NA	VCISFLFL	tr|Q91Y10|Q91Y10_MOUSE|690-697
WT	131.7	NA	VVLFVIGL	sp|Q9EPR5|SORC2_MOUSE|1084-1091
WT	61.9	NA	SMYFDRFL	sp|Q8VEB1|GRK5_MOUSE|164-171
WT	338.6	NA	ITVSLIML	sp|Q8CD26|S35E1_MOUSE|303-310,tr|F7BUQ6|F7BUQ6_MOUSE|180-187
WT	98.7	NA	KNFAMSYV	sp|Q8C3J5|DOCK2_MOUSE|525-532,tr|D6RGU3|D6RGU3_MOUSE|525-532,tr|Q5SRI3|Q5SRI3_MOUSE|525-532
WT	233.6	NA	VYMIRVYL	sp|Q9CQU3|RER1_MOUSE|53-60
WT	60.3	NA	ISMAASTL	sp|B1AZA5|TM245_MOUSE|271-278,tr|D3YWD3|D3YWD3_MOUSE|271-278
WT	144.5	NA	VVLWLEQL	sp|Q8R079|BFAR_MOUSE|187-194,tr|A0A0R4J040|A0A0R4J040_MOUSE|187-194
WT	53.9	NA	LGIRYDNL	sp|Q8BW94|DYH3_MOUSE|2955-2962,tr|A0A140LIN9|A0A140LIN9_MOUSE|2223-2230
WT	201.1	NA	TGYTLESL	sp|P51943|CCNA2_MOUSE|370-377,tr|A0A0G2JEY1|A0A0G2JEY1_MOUSE|233-240
WT	170.3	NA	LFFCRYNM	tr|Q8VFK3|Q8VFK3_MOUSE|167-174
WT	317.9	NA	FYNTFTAL	tr|Q8VEY6|Q8VEY6_MOUSE|280-287
WT	413.1	NA	SVYHITDI	sp|Q9JLC8|SACS_MOUSE|1564-1571,tr|E9QNY8|E9QNY8_MOUSE|1564-1571
WT	364.5	NA	LVIHSMHL	sp|D3Z6P0|PDIA2_MOUSE|254-261
WT	191.7	NA	RYLSFIQL	sp|Q8BKW4|ZCHC4_MOUSE|109-116
WT	278.1	NA	FALRVFSL	tr|G3X9B1|G3X9B1_MOUSE|725-732
WT	29.2	NA	SLYRLTGL	sp|P58735|S26A1_MOUSE|562-569,tr|G5E8U1|G5E8U1_MOUSE|578-585
WT	189.3	NA	IAIDVAFL	sp|Q8C779|CX057_MOUSE|760-767
WT	365.6	NA	AAEYLAML	tr|J3QMC5|J3QMC5_MOUSE|2927-2934,tr|A2ANY6|A2ANY6_MOUSE|2927-2934
WT	499.8	NA	GSFVSGQL	sp|Q9Z306|S22A4_MOUSE|156-163
WT	198	NA	IIYNNLGI	sp|E9Q401|RYR2_MOUSE|3282-3289,tr|F6U7V1|F6U7V1_MOUSE|3282-3289
WT	57.9	NA	APFVYTYL	tr|Q8VF05|Q8VF05_MOUSE|252-259,tr|Q8VGX2|Q8VGX2_MOUSE|252-259
WT	176.8	NA	SRWRFPPI	tr|A6X8Z9|A6X8Z9_MOUSE|316-323
WT	301.6	NA	MGMWTGML	sp|P57725|SAMN1_MOUSE|200-207,tr|D3Z0Y1|D3Z0Y1_MOUSE|329-336
WT	206.7	NA	ITPYECPL	sp|Q8BJK1|KCTD7_MOUSE|199-206
WT	30.5	NA	VASYHALL	sp|Q6NVD9|BFSP2_MOUSE|403-410
WT	65.5	NA	AGWQFKPM	tr|A0A0G2JGJ4|A0A0G2JGJ4_MOUSE|93-100
WT	79.5	NA	VVNSYNGL	sp|O88470|FOXL2_MOUSE|266-273
WT	456.9	NA	LLYRRFAP	sp|Q91VB4|HPS3_MOUSE|291-298,tr|E9PZY1|E9PZY1_MOUSE|159-166
WT	315.1	NA	KTSKFLPI	sp|Q6NS46|RRP5_MOUSE|1110-1117
WT	197	NA	SIFGSVAL	sp|Q9R0H5|K2C71_MOUSE|83-90
WT	6.7	NA	NSYFYGQL	sp|Q02591|GSC_MOUSE|81-88
WT	249.5	NA	ALQYVAPL	sp|Q8C2L6|T161B_MOUSE|375-382
WT	22	NA	VAFYLIFL	sp|Q8BJ51|MFS11_MOUSE|320-327
WT	222.7	NA	FISHYTLL	sp|Q8BW86|ARG33_MOUSE|441-448
WT	370.7	NA	KMQSYSAM	sp|E9Q4J9|AGRF2_MOUSE|168-175
WT	88.8	NA	AIFQHWVL	sp|Q6UJB9|WBS28_MOUSE|41-48
WT	104.4	NA	VTFSIYGF	sp|Q8VDB9|S620A_MOUSE|293-300,sp|O88575|S620B_MOUSE|336-343,tr|E9Q0H0|E9Q0H0_MOUSE|256-263
WT	15.3	NA	CNMVFSSL	sp|O35914|BNC1_MOUSE|360-367,sp|Q8BMQ3|BNC2_MOUSE|504-511,tr|F8VPY0|F8VPY0_MOUSE|389-396,tr|H3BIU2|H3BIU2_MOUSE|476-483,tr|H3BLG6|H3BLG6_MOUSE|434-441
WT	361.6	NA	PSYAHPAL	sp|Q3UHR0|BAHC1_MOUSE|2284-2291,tr|E9Q7G4|E9Q7G4_MOUSE|2284-2291
WT	7.3	NA	VSYIYNGF	sp|Q505K2|F16A1_MOUSE|308-315,tr|E9PX40|E9PX40_MOUSE|87-94
WT	485.6	NA	AQSNYVRL	sp|Q9CQ35|GRPL2_MOUSE|13-20
WT	138.7	NA	FSGRYFHI	sp|Q8R3P9|SLF1_MOUSE|459-466
WT	17.8	NA	IARFFKGL	sp|Q3US41|ESRP1_MOUSE|240-247,tr|F8WGU3|F8WGU3_MOUSE|241-248,tr|Z4YJI3|Z4YJI3_MOUSE|241-248,tr|Z4YMV4|Z4YMV4_MOUSE|76-83,tr|Z4YMQ5|Z4YMQ5_MOUSE|227-234
WT	499.7	NA	LFKHFHSV	sp|Q9ERU9|RBP2_MOUSE|629-636
WT	110.1	NA	IIFLVQLM	tr|Q6DFW5|Q6DFW5_MOUSE|73-80
WT	237.7	NA	KMYSDAFL	sp|O35638|STAG2_MOUSE|317-324,sp|Q9D3E6|STAG1_MOUSE|320-327,tr|A2AFF6|A2AFF6_MOUSE|317-324,tr|D6REF2|D6REF2_MOUSE|320-327,tr|F8WHU7|F8WHU7_MOUSE|320-327
WT	339.2	NA	FTKDFAPV	sp|Q8VDS4|RPR1A_MOUSE|77-84
WT	118.1	NA	VHLLMSLL	sp|Q9WTL4|INSRR_MOUSE|11-18
WT	153.1	NA	LYFLATLL	sp|Q9D3H0|TMM80_MOUSE|12-19
WT	191.1	NA	IGLGSAPL	sp|Q7TST0|BTNL1_MOUSE|145-152
WT	189.8	NA	STLRSSHL	sp|P42859|HD_MOUSE|2746-2753,tr|G3X9H5|G3X9H5_MOUSE|2747-2754
WT	25.2	NA	LYYFYDRL	sp|Q3TD49|SPP2B_MOUSE|233-240
WT	9.6	NA	SVFPFLIL	sp|D0VYS2|HSF3_MOUSE|478-485,tr|E9QNK9|E9QNK9_MOUSE|478-485
WT	237.2	NA	SLFVLIAL	sp|Q8K442|ABC8A_MOUSE|1160-1167,tr|F8WGE3|F8WGE3_MOUSE|1159-1166
WT	371.5	NA	VTNLIPYL	tr|F6XWY6|F6XWY6_MOUSE|37-44,tr|Q91WA9|Q91WA9_MOUSE|285-292
WT	401.6	NA	RGYLFLLS	sp|Q69ZR9|TASOR_MOUSE|460-467
WT	261.9	NA	QNPNYYNL	sp|Q6P4T2|U520_MOUSE|1766-1773
WT	138.5	NA	RNYMSEHL	sp|Q07832|PLK1_MOUSE|483-490
WT	284	NA	VVSVLHHL	sp|Q8C8U0|LIPB1_MOUSE|722-729
WT	148.1	NA	AIATYWAL	sp|Q9WV71|ASB4_MOUSE|213-220
WT	304.4	NA	MSPHFEEI	sp|Q9EPL4|METL9_MOUSE|163-170,tr|A0A140LJ45|A0A140LJ45_MOUSE|52-59
WT	133.9	NA	ILFAVALM	tr|Q5NCD7|Q5NCD7_MOUSE|33-40
WT	464.7	NA	ITSLSFLL	sp|Q8CD54|PIEZ2_MOUSE|65-72,tr|S4R2S0|S4R2S0_MOUSE|65-72,tr|E9QNW4|E9QNW4_MOUSE|65-72
WT	417.5	NA	AFRHSSSL	sp|Q61967|ZFP90_MOUSE|286-293,tr|Q78F42|Q78F42_MOUSE|355-362
WT	283.6	NA	TMKLFTQV	sp|Q9JIW4|DPOLM_MOUSE|236-243,tr|Q5NCI3|Q5NCI3_MOUSE|236-243
WT	104.3	NA	LGTFHASL	sp|Q6ZQ73|CAND2_MOUSE|169-176
WT	258.2	NA	STVERAHL	sp|Q9JJ59|ABCB9_MOUSE|698-705
WT	87.5	NA	VIAFIPAL	tr|B1ARV5|B1ARV5_MOUSE|370-377
WT	193.5	NA	MMVQYQDL	sp|E9Q6X9|RHG40_MOUSE|510-517,tr|A0A0A0MQB4|A0A0A0MQB4_MOUSE|513-520
WT	34.3	NA	KAFHIASL	tr|Q80VN4|Q80VN4_MOUSE|755-762
WT	229.8	NA	VVLFSSAV	sp|Q17ST2|KCNA7_MOUSE|356-363
WT	245.8	NA	VTGYLLQL	sp|Q9Z0W3|NU160_MOUSE|827-834
WT	330.6	NA	KCYLHTNV	sp|Q8R5L3|VPS39_MOUSE|466-473
WT	351.4	NA	IATYRNLL	sp|Q61414|K1C15_MOUSE|396-403,tr|B1AQ77|B1AQ77_MOUSE|396-403
WT	20.5	NA	YAVTFLNL	sp|Q80ZA4|PKHL1_MOUSE|3318-3325,tr|E9PUU8|E9PUU8_MOUSE|3318-3325,tr|F8WH29|F8WH29_MOUSE|3318-3325
WT	156.6	NA	FFCLFSRL	tr|A0A087WNZ6|A0A087WNZ6_MOUSE|83-90
WT	70.6	NA	PTYRFERL	sp|Q9ES52|SHIP1_MOUSE|645-652
WT	361.7	NA	FGFFGTTV	sp|B2RU40|PRRT4_MOUSE|217-224
WT	69.4	NA	GSYFGYSL	sp|A2ARA8|ITA8_MOUSE|53-60,tr|G3UYN5|G3UYN5_MOUSE|53-60
WT	398	NA	RVFFPQDL	sp|Q5SSK3|TEFM_MOUSE|316-323
WT	89.5	NA	FTFSLLLL	tr|L7N2A0|L7N2A0_MOUSE|7-14
WT	43	NA	QSVKFQPL	sp|Q99M01|SYFM_MOUSE|350-357,tr|G3X9Q4|G3X9Q4_MOUSE|118-125
WT	40.7	NA	ITGAFVSL	tr|E9PXX9|E9PXX9_MOUSE|574-581
WT	466.2	NA	LFLFMTVL	tr|Q8R280|Q8R280_MOUSE|53-60
WT	47.6	NA	VIMPFWIL	sp|Q924Z4|CERS2_MOUSE|278-285
WT	364.7	NA	YVRSFSLV	sp|Q9JLH8|TMOD4_MOUSE|225-232
WT	99.5	NA	MSFHHMGA	tr|Q8C4Y4|Q8C4Y4_MOUSE|95-102
WT	404.1	NA	VTYSVEGF	sp|Q5SUA5|MYO1G_MOUSE|530-537
WT	337.9	NA	KILLFLVL	tr|A0A140T8K4|A0A140T8K4_MOUSE|24-31
WT	57.6	NA	VLFTTFLL	sp|Q07763|CD244_MOUSE|6-13,tr|Q3TAZ6|Q3TAZ6_MOUSE|6-13
WT	26.6	NA	VALYATHL	sp|Q6VH22|IF172_MOUSE|1446-1453
WT	138.1	NA	INVEFPVV	sp|Q9ER65|CSTN2_MOUSE|461-468
WT	402.9	NA	LPKFYTKL	sp|Q8C131|HCAR1_MOUSE|285-292,tr|E9PZR8|E9PZR8_MOUSE|293-300
WT	7.7	NA	VGLAFRNL	sp|Q8K0H7|S45A3_MOUSE|246-253
WT	240.2	NA	ISFIFKYN	sp|P50636|RN19A_MOUSE|6-13
WT	118.7	NA	LTKTFLTL	sp|O88543|CSN3_MOUSE|310-317,tr|F6YCA7|F6YCA7_MOUSE|233-240
WT	103.8	NA	STYLVAFV	sp|Q11011|PSA_MOUSE|243-250,tr|E9Q6F4|E9Q6F4_MOUSE|243-250,tr|F6QYF8|F6QYF8_MOUSE|199-206,tr|E9Q039|E9Q039_MOUSE|243-250,tr|F7ANF4|F7ANF4_MOUSE|20-27,tr|F6V7K3|F6V7K3_MOUSE|217-224
WT	392.3	NA	GQFLRVPL	sp|Q9JJA4|WDR12_MOUSE|59-66,tr|D3Z369|D3Z369_MOUSE|59-66
WT	18.1	NA	VLMVFVHL	sp|Q8BG58|P4HTM_MOUSE|64-71,tr|A0A0A6YX56|A0A0A6YX56_MOUSE|64-71
WT	53	NA	MITAFGNL	tr|Q8VG76|Q8VG76_MOUSE|36-43,tr|F8VQ31|F8VQ31_MOUSE|36-43
WT	74.1	NA	TAPYFTDL	sp|Q80WQ4|K1456_MOUSE|20-27,tr|D3YYA2|D3YYA2_MOUSE|20-27
WT	400.5	NA	AQRTYGPL	sp|Q8VHC5|CABP4_MOUSE|104-111
WT	62.2	NA	ASWVLRSL	sp|Q571H0|NPA1P_MOUSE|2100-2107,tr|E9PU96|E9PU96_MOUSE|2103-2110
WT	62.6	NA	KSFNYSSA	sp|Q8C827|ZFP62_MOUSE|502-509,tr|J3JS23|J3JS23_MOUSE|495-502
WT	327.3	NA	RITKYPLL	sp|A1IGU4|ARH37_MOUSE|171-178,sp|Q8R0J1|PKHG6_MOUSE|312-319,tr|E9Q5R6|E9Q5R6_MOUSE|171-178
WT	66.2	NA	IIYIKVYM	sp|Q2NL51|GSK3A_MOUSE|218-225,tr|D3Z7E5|D3Z7E5_MOUSE|218-225
WT	51.6	NA	KSHCFPPM	sp|B1AY10|NFX1_MOUSE|1013-1020
WT	109.4	NA	LSMKMMLL	sp|O35600|ABCA4_MOUSE|838-845
WT	248.3	NA	MSPLIPFL	sp|Q8VIM6|STRC_MOUSE|838-845
WT	258.3	NA	IYTSHLQL	sp|Q9ERU9|RBP2_MOUSE|492-499
WT	72.6	NA	TIFIERPL	sp|Q3TYX3|SMYD5_MOUSE|47-54
WT	253.1	NA	ISSYFVST	sp|Q9QZQ8|H2AY_MOUSE|334-341
WT	19.3	NA	SSFSHPVL	sp|Q7TQB9|TR143_MOUSE|107-114
WT	290	NA	VVEVWSQL	sp|Q922Q9|CHID1_MOUSE|190-197,tr|A0A0R4J242|A0A0R4J242_MOUSE|193-200,tr|G8JL55|G8JL55_MOUSE|192-199,tr|A0A0R4J058|A0A0R4J058_MOUSE|193-200,tr|D3YWG2|D3YWG2_MOUSE|190-197
WT	474.7	NA	SSHYQAGV	sp|Q2PZL6|FAT4_MOUSE|252-259
WT	190.1	NA	AFVHFLGI	sp|Q7M758|NALDL_MOUSE|520-527
WT	494.5	NA	RSFCNHNV	sp|Q61288|ACVL1_MOUSE|91-98
WT	23.5	NA	KAYMLMTL	sp|Q03147|CDK7_MOUSE|115-122
WT	294.7	NA	LLFMIGEL	sp|O35149|ZNT4_MOUSE|122-129,tr|A2AK40|A2AK40_MOUSE|122-129
WT	73.4	NA	FAPYFGHM	tr|E9PZS2|E9PZS2_MOUSE|217-224,tr|Q8C6L9|Q8C6L9_MOUSE|217-224,tr|D3YUK0|D3YUK0_MOUSE|217-224,tr|A0A087WSL7|A0A087WSL7_MOUSE|217-224
WT	375.8	NA	GMFKYEEI	sp|P70175|DLG3_MOUSE|143-150,tr|A2BEE9|A2BEE9_MOUSE|143-150,tr|Q52KF7|Q52KF7_MOUSE|125-132
WT	206.8	NA	IFIYVWPL	tr|Q7TQX8|Q7TQX8_MOUSE|255-262,tr|Q8VGE9|Q8VGE9_MOUSE|258-265,tr|Q8VGE7|Q8VGE7_MOUSE|255-262,tr|Q8VGE5|Q8VGE5_MOUSE|255-262,tr|Q7TQX4|Q7TQX4_MOUSE|255-262,tr|Q8VF48|Q8VF48_MOUSE|255-262,tr|Q7TQX5|Q7TQX5_MOUSE|255-262
WT	263.8	NA	AGFQFPFT	sp|Q8K445|CLRN1_MOUSE|209-216,tr|Q8K444|Q8K444_MOUSE|149-156
WT	305.1	NA	LNQNFMLI	sp|P54731|FAF1_MOUSE|189-196
WT	170.6	NA	SGADYLHL	sp|Q8VEE0|RPE_MOUSE|29-36,tr|A0A087WQM3|A0A087WQM3_MOUSE|29-36,tr|M0QWJ2|M0QWJ2_MOUSE|29-36,tr|B2KGF0|B2KGF0_MOUSE|29-36,tr|M0QWQ0|M0QWQ0_MOUSE|29-36
WT	419.9	NA	SGPCLSPL	sp|Q6PAJ3|GARE2_MOUSE|735-742
WT	368.8	NA	TWFPVHSL	tr|B2FDE5|B2FDE5_MOUSE|18-25,tr|B1ASY6|B1ASY6_MOUSE|18-25
WT	422.8	NA	LFGNYTLL	sp|O55017|CAC1B_MOUSE|694-701,sp|P97445|CAC1A_MOUSE|701-708,sp|Q61290|CAC1E_MOUSE|689-696,tr|A2AIS0|A2AIS0_MOUSE|694-701,tr|A0A087WS83|A0A087WS83_MOUSE|689-696,tr|A2AIR9|A2AIR9_MOUSE|694-701,tr|E9QK20|E9QK20_MOUSE|381-388,tr|E9Q1R5|E9Q1R5_MOUSE|654-661,tr|A2AIR7|A2AIR7_MOUSE|695-702
WT	10.2	NA	TNYYLFSL	sp|Q8BZ39|NMUR2_MOUSE|72-79
WT	235.9	NA	ISFENVSF	sp|G5E8Q8|AGRF5_MOUSE|69-76
WT	19.1	NA	VHYGFASV	tr|K7N6Q1|K7N6Q1_MOUSE|251-258,tr|A0A140LIE7|A0A140LIE7_MOUSE|251-258,tr|K7N6V7|K7N6V7_MOUSE|254-261,tr|A0PK55|A0PK55_MOUSE|251-258
WT	202.2	NA	KFYRGTPL	sp|Q9QYJ7|DS13B_MOUSE|90-97,tr|Z4YLI2|Z4YLI2_MOUSE|208-215,tr|Q7TNW3|Q7TNW3_MOUSE|155-162,tr|V9GXA1|V9GXA1_MOUSE|113-120,tr|V9GXH4|V9GXH4_MOUSE|140-147
WT	238.1	NA	KHFEHVRM	sp|P12023|A4_MOUSE|510-517
WT	151.7	NA	FSVVYTFV	tr|E9PV37|E9PV37_MOUSE|284-291
WT	416.6	NA	STLSHTAI	tr|J3QMC5|J3QMC5_MOUSE|2359-2366,tr|A2ANY6|A2ANY6_MOUSE|2359-2366
WT	72.2	NA	IAASYGNV	sp|Q6PNC0|DMXL1_MOUSE|72-79,tr|F8WGX5|F8WGX5_MOUSE|72-79
WT	30.9	NA	ETFNFCHL	sp|Q9DBY8|NVL_MOUSE|454-461
WT	206.2	NA	SSLVVSPM	tr|F6Z9B9|F6Z9B9_MOUSE|234-241
WT	490.4	NA	LGLLIANV	sp|Q8CE47|MFSD7_MOUSE|177-184
WT	264.5	NA	GTYILQTL	sp|E9QA28|CEA16_MOUSE|106-113
WT	374.4	NA	SGIYHCGI	tr|D3Z5D6|D3Z5D6_MOUSE|98-105,tr|Q8BNV8|Q8BNV8_MOUSE|98-105,tr|D6RJI6|D6RJI6_MOUSE|98-105,tr|Q8C239|Q8C239_MOUSE|98-105,tr|A6XA72|A6XA72_MOUSE|98-105,tr|Q6QX36|Q6QX36_MOUSE|98-105
WT	201.8	NA	AYFESPNL	sp|O88196|TTC3_MOUSE|1367-1374,tr|G5E8T2|G5E8T2_MOUSE|1367-1374
WT	425.7	NA	STDFATSL	sp|A2ASS6|TITIN_MOUSE|24383-24390,tr|E9Q8N1|E9Q8N1_MOUSE|22637-22644,tr|E9Q8K5|E9Q8K5_MOUSE|22637-22644
WT	57	NA	LFNYFSTM	tr|E9QAF2|E9QAF2_MOUSE|1179-1186,tr|E9PWJ7|E9PWJ7_MOUSE|1180-1187
WT	430.9	NA	SVAGLFHL	sp|Q9D0L7|ARM10_MOUSE|182-189,tr|D3Z5T2|D3Z5T2_MOUSE|182-189
WT	218.8	NA	LVGPYVPL	sp|Q8BXR6|PELI3_MOUSE|365-372,tr|D3Z6V8|D3Z6V8_MOUSE|331-338,tr|A0A0R4J057|A0A0R4J057_MOUSE|365-372
WT	167.6	NA	RSRFYSGF	sp|Q8CCS6|PABP2_MOUSE|273-280,tr|D3Z5F7|D3Z5F7_MOUSE|304-311,tr|D3Z055|D3Z055_MOUSE|149-156,tr|G3UY42|G3UY42_MOUSE|300-307,tr|G3UWS5|G3UWS5_MOUSE|149-156
WT	33.4	NA	SFMWISNL	tr|Q8BJ45|Q8BJ45_MOUSE|698-705
WT	365.7	NA	KILACAPL	sp|P43406|ITAV_MOUSE|134-141,tr|A2AKI5|A2AKI5_MOUSE|134-141
WT	284.8	NA	GGITFFPV	sp|Q64700|RBL2_MOUSE|751-758
WT	301.7	NA	ASFPFPGS	sp|Q69ZB8|ZCHC2_MOUSE|905-912,tr|A0A087WSQ9|A0A087WSQ9_MOUSE|508-515
WT	345.6	NA	VFGQFAYF	sp|Q923L3|CSMD1_MOUSE|1663-1670
WT	155.9	NA	QALPYVAL	sp|Q99246|CAC1D_MOUSE|1368-1375,sp|Q9JIS7|CAC1F_MOUSE|1330-1337,sp|Q02789|CAC1S_MOUSE|1265-1272,sp|Q01815|CAC1C_MOUSE|1358-1365,tr|A0A087WS67|A0A087WS67_MOUSE|1383-1390,tr|B1AVA6|B1AVA6_MOUSE|44-51,tr|B1AVA5|B1AVA5_MOUSE|51-58,tr|F8WJL1|F8WJL1_MOUSE|1358-1365,tr|A0A087WRM3|A0A087WRM3_MOUSE|1406-1413,tr|F7CNJ1|F7CNJ1_MOUSE|999-1006,tr|A0A087WPZ8|A0A087WPZ8_MOUSE|1358-1365,tr|B1AVA4|B1AVA4_MOUSE|13…
WT	120.8	NA	IFAGFGLL	sp|Q925F3|R144A_MOUSE|253-260
WT	129.4	NA	RLFIWAIL	sp|P70412|CUZD1_MOUSE|6-13,tr|B2RU69|B2RU69_MOUSE|6-13
WT	54.6	NA	VTLDRAPL	tr|A0A0A6YYP6|A0A0A6YYP6_MOUSE|231-238,tr|E9PZC9|E9PZC9_MOUSE|231-238,tr|E9PZD0|E9PZD0_MOUSE|229-236,tr|D3YXM0|D3YXM0_MOUSE|231-238,tr|A0A0A6YWR3|A0A0A6YWR3_MOUSE|164-171,tr|Q6F5F2|Q6F5F2_MOUSE|231-238,tr|Q1AN90|Q1AN90_MOUSE|231-238,tr|Q3U390|Q3U390_MOUSE|231-238,tr|K7N6K7|K7N6K7_MOUSE|231-238,tr|A0A0A6YXN8|A0A0A6YXN8_MOUSE|231-238,tr|F6UP26|F6UP26_MOUSE|100-107,tr|A0A0A6YWF8|A0A0A6YWF8_MOUSE|164…
WT	245.5	NA	VANYCSEL	sp|A2AJB1|CC183_MOUSE|197-204
WT	220.2	NA	VNHLLREL	sp|P11531|DMD_MOUSE|2406-2413
WT	248.5	NA	LLFINHRL	sp|Q9JK91|MLH1_MOUSE|259-266,tr|A0A0G2JDY9|A0A0G2JDY9_MOUSE|54-61
WT	6.7	NA	ATIFFTRL	sp|Q61194|P3C2A_MOUSE|1367-1374,tr|F8VPL2|F8VPL2_MOUSE|1367-1374
WT	193.4	NA	IFLTTFPL	sp|P97366|EVI5_MOUSE|327-334,tr|E9PWR7|E9PWR7_MOUSE|283-290,tr|F8VPT6|F8VPT6_MOUSE|327-334,tr|E9Q9B1|E9Q9B1_MOUSE|283-290,tr|Q3TMK4|Q3TMK4_MOUSE|283-290
WT	31.8	NA	SSLPWMGL	sp|A2A6C4|SPP2C_MOUSE|665-672
WT	32.3	NA	SSPHFPPV	tr|E0CXV1|E0CXV1_MOUSE|671-678,tr|Q3UGX8|Q3UGX8_MOUSE|672-679,tr|Q3UHC1|Q3UHC1_MOUSE|710-717
WT	90.8	NA	SVVFWSVL	tr|F6VFS9|F6VFS9_MOUSE|46-53,tr|A0A0U1RPR8|A0A0U1RPR8_MOUSE|47-54
WT	47	NA	NIFTFIFL	sp|Q9R053|SCNBA_MOUSE|1074-1081
WT	21.4	NA	TYQFHPNL	sp|Q80XQ2|TBCD5_MOUSE|422-429
WT	84.7	NA	VTVVFQIM	tr|Q8BII3|Q8BII3_MOUSE|65-72
WT	95.3	NA	ILRRFLVL	sp|Q8CIP4|MARK4_MOUSE|286-293
WT	113	NA	INYYKFSS	sp|P48025|KSYK_MOUSE|538-545,tr|E9PWE9|E9PWE9_MOUSE|515-522
WT	259.1	NA	SSITEFIL	tr|Q7TR39|Q7TR39_MOUSE|7-14
WT	287.2	NA	AVDLYSML	sp|Q3ULW6|CCD33_MOUSE|772-779,tr|E9QQ55|E9QQ55_MOUSE|772-779,tr|D3YU68|D3YU68_MOUSE|586-593,tr|A0A0R4J0H2|A0A0R4J0H2_MOUSE|587-594
WT	410	NA	SVDDYYRL	tr|Q91XX9|Q91XX9_MOUSE|398-405
WT	60.8	NA	IVSVFYSI	tr|Q8VFW3|Q8VFW3_MOUSE|271-278
WT	185	NA	TYYFEGGL	sp|Q149F1|RUSD2_MOUSE|145-152
WT	163.2	NA	MNRSFYFV	tr|Q5SVP0|Q5SVP0_MOUSE|176-183,tr|Q5SVP2|Q5SVP2_MOUSE|176-183,tr|Q8CB10|Q8CB10_MOUSE|176-183,tr|Q5NCB3|Q5NCB3_MOUSE|176-183
WT	461.7	NA	QHLFYALF	tr|Q5SSP0|Q5SSP0_MOUSE|24-31,tr|Q8VGT1|Q8VGT1_MOUSE|24-31,tr|Q7TRX4|Q7TRX4_MOUSE|24-31,tr|Q8VGI2|Q8VGI2_MOUSE|27-34,tr|Q8VGR5|Q8VGR5_MOUSE|22-29,tr|B0QZP1|B0QZP1_MOUSE|27-34,tr|A0A0U1RNJ4|A0A0U1RNJ4_MOUSE|24-31,tr|E9Q4M1|E9Q4M1_MOUSE|30-37
WT	257.8	NA	SQWKRLLL	tr|D3Z3U4|D3Z3U4_MOUSE|119-126
WT	381.5	NA	VFTNTAGL	sp|Q0VGM9|RTEL1_MOUSE|382-389,tr|Z4YLW7|Z4YLW7_MOUSE|198-205
WT	492.8	NA	LSPVLLLL	tr|D3Z5D6|D3Z5D6_MOUSE|9-16,tr|Q8BNV8|Q8BNV8_MOUSE|9-16,tr|D6RJI6|D6RJI6_MOUSE|9-16,tr|Q8C239|Q8C239_MOUSE|9-16,tr|A6XA72|A6XA72_MOUSE|9-16,tr|Q6QX36|Q6QX36_MOUSE|9-16
WT	408.6	NA	VRYDILPL	sp|Q3TP92|CNEP1_MOUSE|41-48
WT	475.9	NA	CSYKNGVL	sp|O88799|ZAN_MOUSE|1654-1661,tr|E9PWQ7|E9PWQ7_MOUSE|1698-1705
WT	23.2	NA	ISLPFFIM	tr|Q8VG79|Q8VG79_MOUSE|29-36
WT	366.3	NA	RTHFTVRL	sp|Q9DB15|RM12_MOUSE|130-137
WT	108.4	NA	KSAHYIEL	sp|Q6TCG8|PAQR3_MOUSE|7-14,tr|A0A0G2JER4|A0A0G2JER4_MOUSE|7-14,tr|D3Z181|D3Z181_MOUSE|7-14
WT	129	NA	VPLFFALI	sp|O88854|GALR2_MOUSE|27-34
WT	34.6	NA	SHFLYGTM	sp|A2AVA0|SVEP1_MOUSE|2670-2677
WT	110.7	NA	VLASFLLL	sp|Q8R0J4|TM134_MOUSE|124-131
WT	321.1	NA	VQFVVPRF	sp|Q91XT6|TAC2N_MOUSE|72-79,tr|E0CXQ6|E0CXQ6_MOUSE|72-79
WT	211.5	NA	VSMTVSLI	sp|Q3SXG2|FPRS6_MOUSE|193-200
WT	47.1	NA	VMQYFSNF	sp|O08710|THYG_MOUSE|2654-2661,tr|F7AYJ4|F7AYJ4_MOUSE|786-793,tr|F6XYF6|F6XYF6_MOUSE|1104-1111
WT	321.7	NA	VTVFKTYI	sp|Q9JK37|MYOZ1_MOUSE|175-182
WT	263.7	NA	AIFLRNLM	sp|Q3UHE1|PITM3_MOUSE|821-828
WT	488.5	NA	AQYRFNLS	tr|Q9D5V1|Q9D5V1_MOUSE|132-139
WT	73	NA	ITSRYPLM	sp|Q60943|I17RA_MOUSE|522-529
WT	26.2	NA	VGTFYQGL	sp|Q60I26|AL2CL_MOUSE|382-389,tr|A0A0R4J1X4|A0A0R4J1X4_MOUSE|382-389
WT	313.5	NA	SYVYFQGA	sp|Q3TBD2|HMHA1_MOUSE|716-723,tr|D3Z7R7|D3Z7R7_MOUSE|727-734,tr|G3X9Q3|G3X9Q3_MOUSE|716-723
WT	52.1	NA	SAFQVVGL	tr|E9Q1W9|E9Q1W9_MOUSE|119-126
WT	426.7	NA	NMGFYREL	sp|Q8BMT4|NRROS_MOUSE|283-290
WT	181.1	NA	VFLSFAFF	sp|O08538|ANGP1_MOUSE|3-10
WT	497.7	NA	VSYTIMHS	sp|C6KI89|CTSG2_MOUSE|888-895,tr|A0A140LHM5|A0A140LHM5_MOUSE|256-263,tr|A0A140LJ05|A0A140LJ05_MOUSE|715-722
WT	441.4	NA	VGVLSGFL	sp|Q5GH66|XKR5_MOUSE|298-305,tr|Q8BG78|Q8BG78_MOUSE|132-139
WT	353.5	NA	SIFTPPVL	tr|Q80VT5|Q80VT5_MOUSE|269-276
WT	314.1	NA	VLYKEERL	sp|Q8CFA1|IRAK2_MOUSE|607-614
WT	255.2	NA	VAVSQAAL	sp|Q6NXJ0|WWC2_MOUSE|771-778
WT	447.6	NA	TSFGRTTV	sp|Q8C119|NDNF_MOUSE|185-192
WT	160.8	NA	YVMHFLTV	sp|P70414|NAC1_MOUSE|773-780,sp|S4R2P9|NAC3_MOUSE|731-738,sp|Q8K596|NAC2_MOUSE|724-731,tr|E9PX50|E9PX50_MOUSE|730-737,tr|Q68FL0|Q68FL0_MOUSE|761-768,tr|G3X9J1|G3X9J1_MOUSE|773-780,tr|S4R2V4|S4R2V4_MOUSE|101-108,tr|G5E8Y0|G5E8Y0_MOUSE|773-780
WT	381.1	NA	ISFQGCVV	tr|Q7TRA9|Q7TRA9_MOUSE|90-97,tr|Q8VET5|Q8VET5_MOUSE|92-99,tr|Q9EQ84|Q9EQ84_MOUSE|90-97
WT	306.6	NA	SIFLITLI	sp|A4FUQ5|FPRS4_MOUSE|112-119
WT	485.6	NA	ISWVYFRK	sp|Q8CDE2|CALI_MOUSE|202-209
WT	4.7	NA	KAYHYVPL	sp|Q8C790|F221A_MOUSE|109-116,tr|D3YVA9|D3YVA9_MOUSE|46-53
WT	260.5	NA	VTVLFDLV	sp|Q6DFV1|CNDG2_MOUSE|942-949
WT	432.7	NA	VMGFGTML	sp|Q9ERB5|SO1C1_MOUSE|118-125,tr|Q66L38|Q66L38_MOUSE|118-125,tr|A0A0N4SUZ6|A0A0N4SUZ6_MOUSE|118-125
WT	308.3	NA	IHNFSPLL	tr|A0A087WR36|A0A087WR36_MOUSE|36-43
WT	94.4	NA	LIYNLKGL	tr|Q7TPY4|Q7TPY4_MOUSE|465-472
WT	182.7	NA	SFLAHSSL	sp|Q8BWY9|CIP2A_MOUSE|197-204,tr|D3Z7B5|D3Z7B5_MOUSE|197-204
WT	366.2	NA	INALVHSL	sp|P98200|AT8A2_MOUSE|926-933
WT	34.3	NA	SQFSYAVF	sp|Q8R366|IGSF8_MOUSE|82-89,tr|D3Z4Q8|D3Z4Q8_MOUSE|82-89,tr|A0A0R4J117|A0A0R4J117_MOUSE|82-89,tr|G3UYZ1|G3UYZ1_MOUSE|19-26
WT	11.2	NA	FSYRIPNL	sp|Q9ERC8|DSCAM_MOUSE|1244-1251
WT	66.6	NA	STYDGFGL	sp|P43247|MSH2_MOUSE|755-762
WT	70.1	NA	IQFTHCLV	tr|E9Q318|E9Q318_MOUSE|119-126,tr|B2RXB0|B2RXB0_MOUSE|177-184
WT	41.9	NA	VQTIFFYL	sp|Q63805|A1AG3_MOUSE|62-69,tr|J3JRU4|J3JRU4_MOUSE|62-69
WT	195.6	NA	EVFPFSSV	tr|E9Q2M4|E9Q2M4_MOUSE|324-331
WT	114.3	NA	LDFSFPLL	sp|Q8CDI2|FBX43_MOUSE|100-107,tr|G3X9B2|G3X9B2_MOUSE|100-107
WT	58.1	NA	SNTLFRTL	tr|E9Q7N9|E9Q7N9_MOUSE|4194-4201
WT	45.6	NA	LLMRYHQL	sp|Q812A2|SRGP3_MOUSE|355-362,tr|F8VPQ4|F8VPQ4_MOUSE|355-362,tr|E9QN14|E9QN14_MOUSE|355-362
WT	264.9	NA	SQKLYATM	sp|P45481|CBP_MOUSE|1619-1626,sp|B2RWS6|EP300_MOUSE|1580-1587,tr|F8VPR5|F8VPR5_MOUSE|1619-1626,tr|A0A0U1RQB6|A0A0U1RQB6_MOUSE|1581-1588
WT	136.9	NA	LSAARYAL	sp|Q9JIS8|S12A4_MOUSE|670-677,sp|Q91V14|S12A5_MOUSE|673-680,tr|A0A076FR46|A0A076FR46_MOUSE|673-680,tr|F8WIJ0|F8WIJ0_MOUSE|672-679
WT	162.2	NA	LMMSLPSL	sp|Q9R053|SCNBA_MOUSE|1469-1476
WT	73.7	NA	IVESYFML	sp|Q8CG71|P3H2_MOUSE|536-543
WT	248.3	NA	IIQEFPEI	sp|B1AVZ0|UPP_MOUSE|280-287
WT	20.4	NA	VSLLFPII	sp|Q9QXW9|LAT2_MOUSE|421-428
WT	435.2	NA	AILALSLL	sp|Q80UG1|FADS6_MOUSE|43-50
WT	323.9	NA	MYMVFFVL	sp|Q6QIY3|SCNAA_MOUSE|371-378,tr|K3W4P8|K3W4P8_MOUSE|371-378
WT	136	NA	TVFHLLGI	tr|A0A140LJ18|A0A140LJ18_MOUSE|12-19,tr|E9PXN3|E9PXN3_MOUSE|12-19
WT	299.9	NA	TFLYRYSI	tr|E9Q8V6|E9Q8V6_MOUSE|331-338
WT	31.2	NA	QMYNFEPM	sp|Q99MV5|M10L1_MOUSE|562-569,tr|D3YWG8|D3YWG8_MOUSE|614-621,tr|G3X8T0|G3X8T0_MOUSE|562-569
WT	481.5	NA	MVRHSIPL	sp|Q61412|VSX2_MOUSE|225-232,tr|Q6PDC1|Q6PDC1_MOUSE|225-232
WT	344.3	NA	LSFGYVRS	sp|Q61329|ZFHX3_MOUSE|289-296,tr|E9QMD3|E9QMD3_MOUSE|289-296
WT	138	NA	IFSLFAPF	sp|Q61627|GRID1_MOUSE|554-561
WT	491.5	NA	KSFSYNSS	tr|A2A761|A2A761_MOUSE|555-562
WT	59.6	NA	TSLIRAHL	sp|P12813|NR4A1_MOUSE|369-376
WT	319.3	NA	FSPPHSSL	sp|Q765H6|MGT5B_MOUSE|557-564,tr|F7BPB5|F7BPB5_MOUSE|184-191
WT	32.9	NA	SSYSLKTL	sp|P30730|LSHR_MOUSE|256-263
WT	211	NA	TIKEFFIL	tr|A3KGI3|A3KGI3_MOUSE|1677-1684
WT	275.6	NA	SIMAWTSV	tr|W4VSP5|W4VSP5_MOUSE|188-195,tr|Q8R2C0|Q8R2C0_MOUSE|188-195,tr|G3X9U3|G3X9U3_MOUSE|188-195,tr|Q9EPS9|Q9EPS9_MOUSE|188-195,tr|Q9EPT1|Q9EPT1_MOUSE|188-195
WT	298.4	NA	VTRLRYPV	sp|Q03526|ITK_MOUSE|336-343,sp|P24604|TEC_MOUSE|337-344,tr|Q8CFK4|Q8CFK4_MOUSE|315-322,tr|Q5STT8|Q5STT8_MOUSE|330-337,tr|Q3U436|Q3U436_MOUSE|337-344
WT	192.9	NA	LVSKFPEL	sp|Q8R1A4|DOCK7_MOUSE|1524-1531,sp|Q8VDR9|DOCK6_MOUSE|1476-1483,tr|A2A9M4|A2A9M4_MOUSE|1524-1531,tr|E9PX48|E9PX48_MOUSE|1494-1501,tr|E9QPN7|E9QPN7_MOUSE|1507-1514,tr|A0A0U1RNK7|A0A0U1RNK7_MOUSE|1494-1501,tr|A2A9M5|A2A9M5_MOUSE|1524-1531
WT	498.6	NA	IFLSALLL	sp|Q8VD31|TPSNR_MOUSE|422-429
WT	312.3	NA	SGFAFSSY	sp|P18526|HVM55_MOUSE|44-51
WT	452.2	NA	LLFSVCAL	sp|Q6A044|F1891_MOUSE|176-183,tr|D3YX96|D3YX96_MOUSE|80-87,tr|D3Z6Z5|D3Z6Z5_MOUSE|139-146
WT	218.4	NA	VQMYFFGA	tr|Q7TR43|Q7TR43_MOUSE|99-106
WT	139	NA	VIFNVKNI	sp|A7XUY5|SKIT5_MOUSE|1434-1441,tr|E9Q072|E9Q072_MOUSE|1448-1455,tr|E9Q4T3|E9Q4T3_MOUSE|1427-1434
WT	373.5	NA	IIFLLIYI	tr|Q8VFW4|Q8VFW4_MOUSE|30-37,tr|Q7TQR3|Q7TQR3_MOUSE|30-37
WT	493.4	NA	AILLPAYL	tr|Q5NCD6|Q5NCD6_MOUSE|29-36
WT	404.2	NA	SPRLYTYL	sp|P35413|GPR3_MOUSE|274-281
WT	199	NA	IQFIQSYF	sp|P10833|RRAS_MOUSE|47-54,sp|P62071|RRAS2_MOUSE|32-39
WT	15	NA	LVYMFNLI	sp|Q3TB48|TM104_MOUSE|18-25,tr|A2A6S1|A2A6S1_MOUSE|18-25
WT	53.2	NA	TTPFVANL	tr|Q5PPQ4|Q5PPQ4_MOUSE|178-185
WT	178	NA	SVMAFACF	tr|Q8VGF0|Q8VGF0_MOUSE|204-211
WT	52.6	NA	IIVMLYHL	sp|Q7TQN9|GP142_MOUSE|281-288,tr|Q1XA02|Q1XA02_MOUSE|287-294
WT	85.6	NA	AVGFFISL	sp|Q8C398|PIGW_MOUSE|346-353
WT	44.3	NA	MSISLAAL	sp|Q8BQZ4|RLGPB_MOUSE|767-774,tr|A2ACC7|A2ACC7_MOUSE|456-463,tr|A2ACC6|A2ACC6_MOUSE|778-785,tr|E9Q0J2|E9Q0J2_MOUSE|790-797,tr|F8WHN4|F8WHN4_MOUSE|774-781
WT	30.6	NA	SNIPFSRV	sp|Q8BG07|PLD4_MOUSE|417-424
WT	51.5	NA	SIYPLAGI	sp|Q8BM75|ARI5B_MOUSE|1161-1168
WT	59.5	NA	IALLNFSL	sp|Q9WTK3|GPAA1_MOUSE|513-520,tr|E9PW03|E9PW03_MOUSE|453-460
WT	284.8	NA	SSPMRCGL	sp|Q9R158|AD26A_MOUSE|156-163
WT	286.5	NA	RIFLFNLA	sp|Q9EP66|HCAR2_MOUSE|60-67
WT	309.1	NA	SYTFPQIL	sp|Q9D5D8|CDYL2_MOUSE|392-399
WT	65.5	NA	LTYWEPRL	sp|O88783|FA5_MOUSE|1888-1895
WT	40.7	NA	VLREFLRL	sp|Q6VNB8|WDFY3_MOUSE|939-946,tr|G3UYW1|G3UYW1_MOUSE|939-946,tr|G3UY81|G3UY81_MOUSE|79-86
WT	61.6	NA	KVMPFAGV	sp|Q810C0|SLIK2_MOUSE|194-201
WT	406.5	NA	FTATWAAM	sp|Q9Z1Q2|ABHGA_MOUSE|359-366
WT	172.4	NA	SQVFWEPL	sp|Q9DA17|TSG13_MOUSE|229-236
WT	42	NA	HTFRHTLL	tr|D6RDF3|D6RDF3_MOUSE|46-53
WT	71.8	NA	VITQFILL	tr|Q5SSP0|Q5SSP0_MOUSE|8-15
WT	17.1	NA	VMMFLFNL	sp|Q99J59|TSN1_MOUSE|9-16,tr|A0A0A0MQL3|A0A0A0MQL3_MOUSE|9-16
WT	160.2	NA	MLLSYPVL	tr|B1AUC4|B1AUC4_MOUSE|114-121,tr|Q3V081|Q3V081_MOUSE|1-8
WT	100.2	NA	IVYLLEKI	sp|Q91X43|SH319_MOUSE|520-527
WT	270.3	NA	VTQILLGL	sp|Q9R1Q6|T176B_MOUSE|63-70,tr|A0A0N4SVT4|A0A0N4SVT4_MOUSE|63-70,tr|A0A0N4SV46|A0A0N4SV46_MOUSE|63-70,tr|A0A0N4SUM7|A0A0N4SUM7_MOUSE|63-70,tr|A0A0N4SUY1|A0A0N4SUY1_MOUSE|63-70
WT	498.9	NA	SAISTVRL	sp|Q9CZU3|SK2L2_MOUSE|735-742
WT	296.8	NA	LGHMFMYF	sp|Q8BVP5|KC1G2_MOUSE|238-245,sp|Q8C4X2|KC1G3_MOUSE|235-242,sp|Q8BTH8|KC1G1_MOUSE|237-244,tr|A0A0U1RPM8|A0A0U1RPM8_MOUSE|237-244,tr|A0A0U1RNW0|A0A0U1RNW0_MOUSE|237-244,tr|Q99K78|Q99K78_MOUSE|265-272,tr|Q6P2B2|Q6P2B2_MOUSE|237-244,tr|A0A0U1RPL1|A0A0U1RPL1_MOUSE|11-18,tr|A0A0U1RPD7|A0A0U1RPD7_MOUSE|237-244,tr|A0A0U1RP94|A0A0U1RP94_MOUSE|237-244
WT	46.9	NA	LMFEHYSI	sp|Q9Z2N8|ACL6A_MOUSE|139-146,tr|A0A0A6YWG8|A0A0A6YWG8_MOUSE|143-150,tr|D3YVN1|D3YVN1_MOUSE|87-94
WT	207.4	NA	GSGMFPPL	sp|Q8BKG4|FZD10_MOUSE|162-169
WT	263.6	NA	LQTRFARI	sp|P29974|CNGA1_MOUSE|629-636
WT	91.6	NA	VGVAHFIL	sp|Q5DU25|IQEC2_MOUSE|776-783,tr|D3Z6V7|D3Z6V7_MOUSE|581-588,tr|E9QAD8|E9QAD8_MOUSE|786-793,tr|A4GZ26|A4GZ26_MOUSE|786-793,tr|D3Z5I6|D3Z5I6_MOUSE|786-793
WT	404.3	NA	VSKSLTGL	sp|P59900|EMIL3_MOUSE|587-594,tr|A2A4B4|A2A4B4_MOUSE|540-547
WT	425.2	NA	SPRNFSPL	sp|Q99MR9|PPR3A_MOUSE|594-601
WT	374.6	NA	VGLNVYSM	sp|Q9DCU6|RM04_MOUSE|246-253
WT	101.4	NA	LNPNFCFL	tr|Q99J77|Q99J77_MOUSE|175-182
WT	37	NA	KVIDYAKL	tr|G3UZ50|G3UZ50_MOUSE|419-426
WT	234.7	NA	CSFFIQAV	tr|E9PZA6|E9PZA6_MOUSE|43-50
WT	5.6	NA	VAFTFPFI	sp|Q6NS65|GPR17_MOUSE|199-206
WT	67.1	NA	KFFTFDSL	sp|Q8BH02|TOR4A_MOUSE|70-77
WT	104	NA	CIFLFSFI	sp|P35377|OPRX_MOUSE|215-222,tr|B0R0C0|B0R0C0_MOUSE|201-208
WT	191.6	NA	VTPSLNPL	tr|Q8VFE9|Q8VFE9_MOUSE|280-287,tr|Q8VFC2|Q8VFC2_MOUSE|282-289,tr|Q8VG91|Q8VG91_MOUSE|277-284,tr|Q7TRT7|Q7TRT7_MOUSE|280-287,tr|Q8VFG3|Q8VFG3_MOUSE|281-288,tr|Q8VFE8|Q8VFE8_MOUSE|280-287,tr|Q8VF15|Q8VF15_MOUSE|291-298
WT	74.6	NA	TFAFFCFL	sp|Q8BRH0|TMTC3_MOUSE|328-335,tr|A0A0R4J173|A0A0R4J173_MOUSE|328-335,tr|G5E8C4|G5E8C4_MOUSE|328-335
WT	283.8	NA	LSQYYKDL	sp|Q0P5X1|LRIQ1_MOUSE|1146-1153
WT	93.6	NA	LSCLFSNV	sp|E9PX95|ABCAH_MOUSE|404-411
WT	320.4	NA	VAGILAAL	sp|Q8BMF3|MAON_MOUSE|313-320
WT	34.4	NA	VSVTWPLL	sp|A2A6C4|SPP2C_MOUSE|327-334
WT	180.9	NA	GQFSFAEV	sp|Q8K2G4|BBS7_MOUSE|513-520,tr|E9Q0R0|E9Q0R0_MOUSE|513-520
WT	84.9	NA	ANISYLTV	sp|Q91WN3|S7A13_MOUSE|258-265
WT	381.9	NA	VNFEDGTL	tr|D3Z2X2|D3Z2X2_MOUSE|2338-2345
WT	55.1	NA	KTLKWASL	sp|Q62010|OVGP1_MOUSE|703-710
WT	184.6	NA	LAYVGAAI	sp|Q6QIY3|SCNAA_MOUSE|199-206,tr|K3W4P8|K3W4P8_MOUSE|199-206
WT	148.6	NA	QNYPLLLL	sp|Q9ERK4|XPO2_MOUSE|40-47,tr|E9QAX7|E9QAX7_MOUSE|40-47,tr|E9Q1T9|E9Q1T9_MOUSE|40-47
WT	273.7	NA	SVFRGSAV	sp|O88632|SEM3F_MOUSE|364-371
WT	430.7	NA	FTIVYAGA	sp|Q80U93|NU214_MOUSE|254-261
WT	110.7	NA	LNMEWMPI	sp|Q8VC69|S22A6_MOUSE|203-210
WT	206.3	NA	MNLYKNNL	sp|Q8BGT1|FLRT3_MOUSE|620-627
WT	137.6	NA	YALVQYAL	sp|Q7TMY7|IPO8_MOUSE|209-216,tr|B2KGD7|B2KGD7_MOUSE|209-216
WT	141.2	NA	PSFTHFLL	sp|P22437|PGH1_MOUSE|88-95
WT	296.9	NA	ITTTHHTL	sp|Q91W98|S15A4_MOUSE|358-365,tr|D3Z4X0|D3Z4X0_MOUSE|57-64,tr|A0A0G2JDS1|A0A0G2JDS1_MOUSE|68-75
WT	336.8	NA	ITWVGILL	sp|Q80TS3|AGRL3_MOUSE|948-955,tr|D3YU23|D3YU23_MOUSE|880-887,tr|K3W4M8|K3W4M8_MOUSE|948-955,tr|D3Z4S7|D3Z4S7_MOUSE|948-955,tr|D3Z634|D3Z634_MOUSE|880-887,tr|D3Z6J2|D3Z6J2_MOUSE|880-887,tr|D3Z3X6|D3Z3X6_MOUSE|948-955,tr|D3YWR3|D3YWR3_MOUSE|880-887,tr|D3Z3G4|D3Z3G4_MOUSE|880-887,tr|D3YWB1|D3YWB1_MOUSE|880-887,tr|D3Z593|D3Z593_MOUSE|880-887,tr|D3YTW7|D3YTW7_MOUSE|948-955,tr|D3Z6H7|D3Z6H7_MOUSE|948-9…
WT	496.5	NA	VNQSLLQL	sp|Q6ZWQ0|SYNE2_MOUSE|5104-5111,tr|Q6DFZ2|Q6DFZ2_MOUSE|365-372,tr|E9QP46|E9QP46_MOUSE|5105-5112
WT	399.6	NA	YVCHYCPM	sp|P16563|CRIS2_MOUSE|165-172
WT	146.9	NA	LLFLAYTL	tr|G8JL51|G8JL51_MOUSE|5-12
WT	159.8	NA	IGLWSAFM	sp|O88343|S4A4_MOUSE|557-564,tr|A7E1Z5|A7E1Z5_MOUSE|548-555,tr|E9Q8N8|E9Q8N8_MOUSE|557-564
WT	33.9	NA	SMFHHLDL	sp|Q8C9X6|EPC1_MOUSE|475-482
WT	125.8	NA	SMFRPIAM	sp|P0C6F1|DYH2_MOUSE|1950-1957,tr|D3Z667|D3Z667_MOUSE|1956-1963
WT	24.6	NA	VYYEYCYM	tr|Q5SVD6|Q5SVD6_MOUSE|164-171
WT	477.7	NA	KATIFCIL	sp|P11859|ANGT_MOUSE|9-16,tr|Q3UTR7|Q3UTR7_MOUSE|14-21
WT	36	NA	SSLLLALL	sp|P55104|INHBC_MOUSE|3-10
WT	115.6	NA	VFELMTNL	sp|P97371|PSME1_MOUSE|156-163,tr|G3UWN9|G3UWN9_MOUSE|145-152,tr|G3UXZ5|G3UXZ5_MOUSE|156-163,tr|G3UXR1|G3UXR1_MOUSE|2-9,tr|G3UXY0|G3UXY0_MOUSE|133-140
WT	458.3	NA	INYTDCHI	sp|Q8BLU0|FLRT2_MOUSE|634-641
WT	436	NA	VSIKMSSF	sp|Q8BX70|VP13C_MOUSE|2848-2855
WT	486.1	NA	QVEIFSSL	sp|E9Q3L2|PI4KA_MOUSE|1319-1326,tr|D6RJ66|D6RJ66_MOUSE|68-75,tr|A0A140T8I9|A0A140T8I9_MOUSE|1258-1265
WT	7.3	NA	ANYDFYQL	sp|Q8VE18|SMG8_MOUSE|629-636,tr|Q99LS6|Q99LS6_MOUSE|172-179
WT	124	NA	EIMRFLSL	sp|Q6A009|LTN1_MOUSE|1222-1229
WT	37.1	NA	IAFFYNRS	sp|P61793|LPAR1_MOUSE|30-37,tr|A2AMJ0|A2AMJ0_MOUSE|30-37,tr|A2AMI9|A2AMI9_MOUSE|30-37,tr|A2AMJ1|A2AMJ1_MOUSE|30-37
WT	186.4	NA	SRIVFIPL	sp|Q9JIM1|S29A1_MOUSE|367-374
WT	484.9	NA	SGYYWIWI	tr|A0A075B5T1|A0A075B5T1_MOUSE|49-56
WT	27.9	NA	LTTIFAQL	sp|Q3UP38|EFC4B_MOUSE|195-202
WT	256.6	NA	SSFSGISI	sp|Q80TM6|R3HD2_MOUSE|380-387,tr|Q148X5|Q148X5_MOUSE|348-355,tr|F6Z9T5|F6Z9T5_MOUSE|113-120,tr|E9Q9D6|E9Q9D6_MOUSE|348-355
WT	2.5	NA	IIYSFSLL	sp|Q5QD12|TAA7A_MOUSE|176-183,sp|Q5QD10|TAA7D_MOUSE|176-183
WT	307.9	NA	RVLYAPRL	sp|Q60625|ICAM5_MOUSE|403-410
WT	96.5	NA	FVHNFSRI	tr|W4VSP5|W4VSP5_MOUSE|25-32
WT	234	NA	VATILLNL	sp|Q8CIW6|S26A6_MOUSE|483-490,tr|A0A087WS07|A0A087WS07_MOUSE|460-467,tr|A0A0A0MQB3|A0A0A0MQB3_MOUSE|460-467
WT	319.5	NA	YTYEQIPV	sp|Q6TCG8|PAQR3_MOUSE|31-38,tr|A0A0G2JER4|A0A0G2JER4_MOUSE|31-38,tr|D3Z181|D3Z181_MOUSE|31-38
WT	117	NA	CVFFYGLV	sp|A2AHL1|ANO3_MOUSE|415-422,tr|A2AHK9|A2AHK9_MOUSE|71-78
WT	15.5	NA	MAVVFSTL	sp|Q810K3|SGPP2_MOUSE|150-157
WT	208.5	NA	VIMVVSPI	tr|E9QJT0|E9QJT0_MOUSE|10-17,tr|D3YV46|D3YV46_MOUSE|10-17
WT	321.8	NA	VVLIMYLM	tr|Q8VF16|Q8VF16_MOUSE|30-37,tr|Q8VFP3|Q8VFP3_MOUSE|30-37
WT	113.6	NA	LLFIHESL	sp|A2RSJ4|UH1BL_MOUSE|826-833
WT	60.9	NA	VGFTRSAV	sp|Q6P9P8|DEN2C_MOUSE|3-10,tr|E9Q4E4|E9Q4E4_MOUSE|9-16,tr|G3UYA7|G3UYA7_MOUSE|9-16
WT	217.9	NA	VIHFYSAT	sp|Q3U0B3|DHR11_MOUSE|162-169
WT	322.5	NA	LTYTWDLI	sp|A2AHL1|ANO3_MOUSE|497-504
WT	405.5	NA	TLWYAPFL	tr|D6RIM5|D6RIM5_MOUSE|167-174
WT	134.8	NA	TIFLHRAF	sp|Q8K2A8|ALG3_MOUSE|282-289
WT	152.7	NA	FSFISEPM	sp|P63115|AAA1_MOUSE|446-453
WT	425.6	NA	VAAKHAAV	sp|P43352|RAD52_MOUSE|294-301,tr|G5E879|G5E879_MOUSE|294-301
WT	79.3	NA	DVWLFAPL	sp|Q3UMG5|LRCH2_MOUSE|137-144,tr|F6VQ19|F6VQ19_MOUSE|148-155
WT	293.8	NA	VKFAVFGL	sp|P37040|NCPR_MOUSE|166-173,tr|E9PVT9|E9PVT9_MOUSE|166-173,tr|Q05DV1|Q05DV1_MOUSE|166-173,tr|E9Q997|E9Q997_MOUSE|166-173
WT	268	NA	TGSGFASL	sp|P05214|TBA3_MOUSE|145-152
WT	403.2	NA	ASHGFYEF	sp|Q3TDQ1|STT3B_MOUSE|112-119,tr|A0A0R4J0D3|A0A0R4J0D3_MOUSE|112-119
WT	388.8	NA	IYVTVTLL	sp|Q8BHW5|T255A_MOUSE|30-37
WT	196.9	NA	IYEAHIRL	sp|P51791|CLCN3_MOUSE|629-636,tr|E9Q2I1|E9Q2I1_MOUSE|602-609,tr|Q3TF45|Q3TF45_MOUSE|629-636,tr|Q8K4W8|Q8K4W8_MOUSE|602-609
WT	295.9	NA	VQKYQALL	sp|A2AAJ9|OBSCN_MOUSE|6776-6783,tr|E9QQ96|E9QQ96_MOUSE|6718-6725,tr|H7BX05|H7BX05_MOUSE|6065-6072,tr|Z4YJE4|Z4YJE4_MOUSE|6865-6872,tr|F6X8F4|F6X8F4_MOUSE|6-13,tr|F6TJX7|F6TJX7_MOUSE|452-459
WT	166.2	NA	STLEFDTM	tr|E9QPS1|E9QPS1_MOUSE|31-38
WT	89.6	NA	SYAFRNPM	sp|Q9D305|THAP2_MOUSE|124-131
WT	293.2	NA	FNQFMMLL	sp|Q71B07|D19L3_MOUSE|260-267
WT	106.3	NA	IIFISLVL	sp|Q3UU41|SCIMP_MOUSE|16-23,tr|F8WHN0|F8WHN0_MOUSE|16-23
WT	433.3	NA	VFRSTFLL	sp|Q9R1S7|MRP6_MOUSE|304-311
WT	351.6	NA	IPIFLMYL	tr|A0A0G2JFH3|A0A0G2JFH3_MOUSE|29-36,tr|A0A0G2JDQ4|A0A0G2JDQ4_MOUSE|29-36
WT	85.1	NA	VMKLFDLL	sp|Q80YQ2|MED23_MOUSE|395-402,tr|H3BJ42|H3BJ42_MOUSE|196-203,tr|F8WJB0|F8WJB0_MOUSE|398-405,tr|E9QNV2|E9QNV2_MOUSE|404-411
WT	76.3	NA	LAFHSAPV	sp|Q9EQ15|GNB1L_MOUSE|290-297,tr|Q3TM20|Q3TM20_MOUSE|276-283
WT	98.7	NA	TAFGLLGL	sp|Q9EQK5|MVP_MOUSE|844-851,tr|E9Q3X0|E9Q3X0_MOUSE|853-860
WT	36	NA	YVLIFYSL	tr|Q8VFA4|Q8VFA4_MOUSE|30-37
WT	38	NA	VGFSKSGL	sp|Q52KB6|C2CD3_MOUSE|572-579,tr|D3Z640|D3Z640_MOUSE|195-202,tr|E9Q526|E9Q526_MOUSE|572-579
WT	491.1	NA	WTLAFGGV	sp|Q5U4D8|SC5A6_MOUSE|256-263
WT	299	NA	ITLQARTL	sp|Q7TNB4|MSTRO_MOUSE|133-140,tr|E9QNX2|E9QNX2_MOUSE|131-138,tr|E9PUF9|E9PUF9_MOUSE|130-137
WT	409.8	NA	QTYITLKL	sp|Q6A065|CE170_MOUSE|76-83,tr|H7BX26|H7BX26_MOUSE|76-83,tr|A0A0A6YXR9|A0A0A6YXR9_MOUSE|76-83,tr|A0A0A6YWV9|A0A0A6YWV9_MOUSE|76-83
WT	162.2	NA	SFVYPYLL	tr|G3X9T2|G3X9T2_MOUSE|226-233
WT	426.1	NA	TWHSFVNI	sp|P29974|CNGA1_MOUSE|8-15,tr|A0A0G2JG06|A0A0G2JG06_MOUSE|8-15,tr|A0A0R4J1V3|A0A0R4J1V3_MOUSE|8-15
WT	393.5	NA	VYKSLALM	tr|E9Q1Z2|E9Q1Z2_MOUSE|71-78
WT	463.1	NA	SLIHFQGF	sp|Q60755|CALCR_MOUSE|432-439
WT	156.2	NA	AQTSFFRL	sp|Q8K595|MCLN2_MOUSE|206-213
WT	471.7	NA	STKLVFPL	tr|Q9D5X0|Q9D5X0_MOUSE|10-17
WT	477.8	NA	RVHRCPPL	sp|Q80UK8|INT2_MOUSE|859-866
WT	466.1	NA	RNLYRQLL	sp|P63154|CRNL1_MOUSE|535-542
WT	366.8	NA	LMFNFLAS	sp|Q8CCJ3|UFL1_MOUSE|583-590
WT	106	NA	LTYLEGLL	sp|Q8CBD1|NRIP1_MOUSE|18-25
WT	185.5	NA	TLPHFLFL	sp|O88537|FPRS3_MOUSE|157-164,sp|A4FUQ5|FPRS4_MOUSE|157-164
WT	140.2	NA	ISLFLSTF	sp|Q9JIT0|LMBR1_MOUSE|59-66,tr|J3QM78|J3QM78_MOUSE|59-66
WT	68.9	NA	AFTYLSAL	tr|Q9DC47|Q9DC47_MOUSE|244-251
WT	189	NA	TQFHVFEL	sp|Q9CWF6|BBS2_MOUSE|467-474
WT	164.5	NA	VTLEIAIL	sp|Q8CEE6|PASK_MOUSE|1109-1116
WT	406.3	NA	IAILARYM	sp|Q04690|NF1_MOUSE|2080-2087,tr|Q5SYH9|Q5SYH9_MOUSE|64-71
WT	292.2	NA	TSLRKLYL	sp|Q8BGT1|FLRT3_MOUSE|247-254
WT	31.5	NA	GTPRFFPL	sp|Q99P88|NU155_MOUSE|1257-1264
WT	134.8	NA	CSLFASAL	sp|Q7TMM8|PAR16_MOUSE|24-31
WT	37.7	NA	FSFLPLNL	sp|Q6UQ17|AT8B3_MOUSE|58-65
WT	17.2	NA	NSLSFALL	sp|Q61826|MADCA_MOUSE|143-150,tr|G5E838|G5E838_MOUSE|143-150
WT	104	NA	VAIAGYAL	sp|P01027|CO3_MOUSE|1189-1196
WT	437.9	NA	GSFPYDSV	sp|Q6P1E1|ZMIZ1_MOUSE|144-151,tr|E0CX95|E0CX95_MOUSE|20-27
WT	459.5	NA	IYSFSVII	sp|Q7M6U3|TEX14_MOUSE|433-440
WT	141.2	NA	RFFFFFRI	tr|B2RR19|B2RR19_MOUSE|37-44
WT	344.5	NA	SSITFWNT	sp|O54901|OX2G_MOUSE|104-111,tr|E9PZI9|E9PZI9_MOUSE|83-90,tr|E9QMY1|E9QMY1_MOUSE|104-111,tr|Q80VX2|Q80VX2_MOUSE|104-111,tr|Q05D16|Q05D16_MOUSE|104-111
WT	6.1	NA	SSMFFITL	sp|P56484|CCR8_MOUSE|117-124
WT	431.7	NA	AAQKYEAL	sp|Q8R1C9|APBB3_MOUSE|287-294
WT	357.8	NA	LSLCLVQL	sp|Q99MX1|UBP26_MOUSE|378-385
WT	323.5	NA	ISIFVAIF	tr|G5E851|G5E851_MOUSE|96-103
WT	107.9	NA	IVFAIENI	tr|D3YUI0|D3YUI0_MOUSE|85-92
WT	426.6	NA	STIHVGLL	tr|Q8VGQ3|Q8VGQ3_MOUSE|156-163
WT	9.1	NA	LLYSYRPL	sp|Q9D7C9|NRK2_MOUSE|103-110
WT	462.3	NA	YSYRLEIV	sp|P23818|GRIA1_MOUSE|452-459,tr|F6YNQ1|F6YNQ1_MOUSE|383-390,tr|Q7TNB5|Q7TNB5_MOUSE|452-459
WT	493.3	NA	KLPLHAFL	sp|E9Q0B3|CC080_MOUSE|65-72
WT	493.1	NA	VAVSCKNL	tr|Q6PCS8|Q6PCS8_MOUSE|105-112
WT	215	NA	MFKYLYLL	sp|Q2HXL6|EDEM3_MOUSE|467-474,tr|B7ZNP0|B7ZNP0_MOUSE|467-474,tr|A0A087WR24|A0A087WR24_MOUSE|467-474,tr|A0A087WQK5|A0A087WQK5_MOUSE|467-474
WT	38.3	NA	CNYIFTVI	tr|Q5SUF7|Q5SUF7_MOUSE|1647-1654,tr|E9PWL1|E9PWL1_MOUSE|1631-1638,tr|Q5SUG4|Q5SUG4_MOUSE|1654-1661,tr|Q5SUG2|Q5SUG2_MOUSE|1613-1620,tr|Q5SUF9|Q5SUF9_MOUSE|1624-1631,tr|Q5SUF8|Q5SUF8_MOUSE|1613-1620,tr|Q5SUF6|Q5SUF6_MOUSE|1647-1654,tr|Q5SUF5|Q5SUF5_MOUSE|1606-1613,tr|Q5SUG3|Q5SUG3_MOUSE|1629-1636,tr|Q5SUG1|Q5SUG1_MOUSE|1607-1614,tr|Q5SUG0|Q5SUG0_MOUSE|1636-1643
WT	3.3	NA	LSFEFMSL	sp|P51163|HEM4_MOUSE|36-43,tr|Q3TPL3|Q3TPL3_MOUSE|36-43,tr|E9PYC9|E9PYC9_MOUSE|36-43
WT	309.4	NA	SVCFGAGL	sp|Q810C0|SLIK2_MOUSE|633-640
WT	34.8	NA	IAYSCKLL	tr|B1AWN4|B1AWN4_MOUSE|923-930
WT	288.8	NA	KMYSFLRG	sp|Q8BKT6|TSN12_MOUSE|209-216
WT	49.4	NA	VATYFSKV	sp|D3Z291|CAHM1_MOUSE|341-348
WT	241.7	NA	KSFRYNSS	sp|P17141|ZFP37_MOUSE|374-381
WT	406.3	NA	ASFTVSVF	sp|Q75N73|S39AE_MOUSE|354-361,tr|A0A0R4J1V1|A0A0R4J1V1_MOUSE|354-361
WT	64.7	NA	ANYKTIGL	tr|F8VPQ6|F8VPQ6_MOUSE|125-132
WT	293	NA	IGRAIPNL	sp|Q5NC83|CG072_MOUSE|125-132,tr|F8WJ82|F8WJ82_MOUSE|129-136
WT	351.2	NA	STWEKVQL	sp|Q8K4C2|I17RC_MOUSE|368-375,tr|F7AR97|F7AR97_MOUSE|249-256
WT	133.7	NA	RARSFHGL	sp|Q0VBL6|HIF3A_MOUSE|518-525
WT	135	NA	RSGLFLSL	tr|Q3UPT2|Q3UPT2_MOUSE|102-109
WT	20	NA	KSLAFAYV	sp|Q9DBT9|M2GD_MOUSE|804-811
WT	413.5	NA	SSSQCAPL	tr|B2KG46|B2KG46_MOUSE|959-966
WT	121.3	NA	YSYLTPDL	sp|P25444|RS2_MOUSE|248-255,tr|F6YTZ4|F6YTZ4_MOUSE|230-237,tr|D3YVC1|D3YVC1_MOUSE|248-255,tr|A0A140T8L5|A0A140T8L5_MOUSE|176-183,tr|J3QMG5|J3QMG5_MOUSE|248-255,tr|E9Q1N8|E9Q1N8_MOUSE|227-234,tr|D3YWJ3|D3YWJ3_MOUSE|248-255
WT	276.2	NA	SILRLQEL	sp|Q6TDU8|CASC1_MOUSE|173-180,tr|A0A0R4J0S9|A0A0R4J0S9_MOUSE|173-180,tr|A0A0R4J1G3|A0A0R4J1G3_MOUSE|160-167,tr|A0A0N4SUQ9|A0A0N4SUQ9_MOUSE|173-180
WT	312.5	NA	TYLYIGIL	sp|Q8BGD6|S38A9_MOUSE|402-409
WT	47.2	NA	CSRSFHNL	sp|Q8C3Q5|SHSA7_MOUSE|314-321,tr|F6T9T6|F6T9T6_MOUSE|131-138
WT	70.1	NA	SLVIYYSL	sp|Q5GH66|XKR5_MOUSE|310-317,tr|Q8BG78|Q8BG78_MOUSE|144-151
WT	391.1	NA	TAQNFLSI	sp|Q6KCD5|NIPBL_MOUSE|1531-1538
WT	221.1	NA	MLFELMRM	sp|Q60751|IGF1R_MOUSE|1242-1249,tr|E9QNX9|E9QNX9_MOUSE|1242-1249
WT	413.7	NA	KLIFQASL	sp|Q3UHA3|SPTCS_MOUSE|1043-1050
WT	120.5	NA	LSFGISEL	sp|P68404|KPCB_MOUSE|259-266
WT	224.5	NA	SIYDHSIF	sp|Q7TT45|RRAGD_MOUSE|269-276,sp|Q99K70|RRAGC_MOUSE|218-225,tr|B1AWT2|B1AWT2_MOUSE|219-226,tr|B1AWT4|B1AWT4_MOUSE|99-106,tr|B1AWT3|B1AWT3_MOUSE|274-281
WT	391	NA	FIFFTALV	tr|Q3UNV4|Q3UNV4_MOUSE|460-467
WT	327.9	NA	QQYNSYPL	tr|A0A140T8M5|A0A140T8M5_MOUSE|109-116
WT	39.9	NA	LAVFFAQI	sp|Q6TCG8|PAQR3_MOUSE|183-190
WT	161.8	NA	SFLRLWPL	tr|Q8C9T4|Q8C9T4_MOUSE|4-11,tr|B3F5L5|B3F5L5_MOUSE|4-11,tr|B3F5L4|B3F5L4_MOUSE|4-11
WT	337.6	NA	LSYRSVDI	sp|Q8BXR5|NALCN_MOUSE|1537-1544,tr|E9QLE4|E9QLE4_MOUSE|1537-1544
WT	431.1	NA	SFFLSTGI	tr|Q8VF25|Q8VF25_MOUSE|249-256,tr|Q8VGF0|Q8VGF0_MOUSE|249-256,tr|Q7TRJ1|Q7TRJ1_MOUSE|249-256
WT	48.4	NA	QVFVFVFL	sp|P01633|KV5A1_MOUSE|15-22,tr|A0A140T8Q3|A0A140T8Q3_MOUSE|6-13
WT	148.5	NA	IVDKYHAL	sp|A2ADU9|AWAT1_MOUSE|294-301
WT	22.1	NA	TAVRYTLL	sp|Q5F2C3|MEIKN_MOUSE|302-309
WT	395.5	NA	LGYPEAVL	sp|Q3USH1|F196A_MOUSE|202-209,tr|E9PZW7|E9PZW7_MOUSE|202-209
WT	135.6	NA	VVVLLMSL	sp|Q60774|TM45A_MOUSE|55-62,tr|Q8BFU6|Q8BFU6_MOUSE|55-62
WT	429.5	NA	QTASYCML	sp|Q8VE19|MIO_MOUSE|673-680
WT	93.2	NA	NTIYFKGL	sp|P32261|ANT3_MOUSE|250-257,tr|A0A0A6YWH7|A0A0A6YWH7_MOUSE|250-257
WT	392.6	NA	KTRHFSVM	sp|Q5SGK3|AOXB_MOUSE|69-76
WT	215.8	NA	VGMLLSKI	sp|P06803|PIM1_MOUSE|83-90
WT	78.8	NA	QAIVFLSL	tr|Q8R261|Q8R261_MOUSE|6-13
WT	15	NA	KSLVFATM	sp|Q8C547|HTR5B_MOUSE|1709-1716
WT	434.5	NA	RIWRLYRI	tr|D3Z2X2|D3Z2X2_MOUSE|1026-1033
WT	101.4	NA	SIYLTCRM	sp|Q9JLC4|SORC1_MOUSE|343-350,tr|E9QQ63|E9QQ63_MOUSE|343-350,tr|E9PYT6|E9PYT6_MOUSE|343-350,tr|E9QQ02|E9QQ02_MOUSE|343-350
WT	253.4	NA	EAYKWYEL	sp|Q8BSY0|ASPH_MOUSE|525-532,tr|A2AL85|A2AL85_MOUSE|509-516,tr|Q8CBM2|Q8CBM2_MOUSE|442-449
WT	136.4	NA	LGINWFLL	sp|Q91ZB8|MRGRD_MOUSE|239-246
WT	226.4	NA	VVILLRTM	sp|Q8K224|NAT10_MOUSE|147-154,tr|A2BH46|A2BH46_MOUSE|147-154
WT	25.2	NA	SSFLFDII	tr|Q7TSF9|Q7TSF9_MOUSE|130-137,tr|D3YW29|D3YW29_MOUSE|130-137
WT	354.8	NA	STVPFLAF	sp|Q3URE9|LIGO2_MOUSE|262-269
WT	15.8	NA	IFTFFLSL	tr|Q3V0L9|Q3V0L9_MOUSE|63-70
WT	61.7	NA	KSYVCFCL	sp|P70375|FA7_MOUSE|107-114
WT	44.6	NA	ASYLLKPI	tr|F8VPS6|F8VPS6_MOUSE|850-857,tr|E9Q7C3|E9Q7C3_MOUSE|781-788
WT	448.6	NA	VGNRLIRL	sp|Q8QZW7|GBRP_MOUSE|135-142
WT	68.8	NA	TIIVLARL	tr|Q8VFA9|Q8VFA9_MOUSE|44-51
WT	400.9	NA	ILYAYQLS	sp|P34152|FAK1_MOUSE|562-569
WT	399	NA	YCIKYGAL	sp|Q9ERK4|XPO2_MOUSE|797-804,tr|E9Q1T9|E9Q1T9_MOUSE|741-748,tr|F6ZEW4|F6ZEW4_MOUSE|484-491
WT	45.3	NA	TFFYVAML	tr|Q7TQS4|Q7TQS4_MOUSE|249-256
WT	340.8	NA	VVGYFCVI	sp|Q8CJ12|AGRG2_MOUSE|782-789,tr|A2AHQ2|A2AHQ2_MOUSE|779-786,tr|Q14BH6|Q14BH6_MOUSE|765-772
WT	227	NA	TTQFHFGM	sp|Q70FJ1|AKAP9_MOUSE|3788-3795,tr|E9QQ10|E9QQ10_MOUSE|3770-3777
WT	111.3	NA	FIFSFHNA	sp|Q8K209|AGRG1_MOUSE|157-164
WT	464.2	NA	LGVLMYEL	sp|Q8C050|KS6A5_MOUSE|240-247
WT	481.8	NA	RSIRVGTL	sp|Q6P7W0|SENP6_MOUSE|468-475,tr|H3BK32|H3BK32_MOUSE|302-309,tr|H3BJS8|H3BJS8_MOUSE|219-226,tr|H3BK20|H3BK20_MOUSE|148-155,tr|F6Z9A1|F6Z9A1_MOUSE|475-482
WT	163.5	NA	IHYHLQLI	tr|A0A0A6YW12|A0A0A6YW12_MOUSE|35-42
WT	137.8	NA	RSYYRNSV	sp|Q8BHD0|RB39A_MOUSE|80-87
WT	150.4	NA	TGYVLVAM	sp|Q61526|ERBB3_MOUSE|84-91
WT	407.6	NA	TTIQIANM	sp|P15092|IFI4_MOUSE|44-51,sp|Q08619|IFI5B_MOUSE|44-51,tr|E9QKL6|E9QKL6_MOUSE|44-51
WT	81.4	NA	VSAFKVGL	tr|A0A0A6YVS7|A0A0A6YVS7_MOUSE|25-32
WT	144.2	NA	SAFYLQLF	sp|Q3T9M1|MFS2B_MOUSE|51-58,tr|D6RDD7|D6RDD7_MOUSE|51-58,tr|B8JK43|B8JK43_MOUSE|51-58
WT	11.6	NA	LFYLFASL	sp|Q6PGE7|SC6A7_MOUSE|141-148
WT	297.9	NA	ATWRQIML	tr|Q3UQ74|Q3UQ74_MOUSE|25-32
WT	26.9	NA	LALAYTEL	sp|A2A9T0|TBKB1_MOUSE|295-302,tr|Z4YKN2|Z4YKN2_MOUSE|294-301
WT	264.7	NA	HAEFFRNL	sp|Q5XPT3|LARG2_MOUSE|323-330,tr|Q14AT0|Q14AT0_MOUSE|324-331,tr|A2AHG6|A2AHG6_MOUSE|348-355
WT	380.3	NA	VSKKHARV	sp|Q5QD17|TAAR2_MOUSE|223-230
WT	19.4	NA	QMYFFVLL	tr|Q8VG37|Q8VG37_MOUSE|100-107
WT	4.6	NA	VSFCYCSI	sp|Q5QD11|TAA7B_MOUSE|128-135
WT	262.6	NA	VAISSPLL	tr|Q8VGU2|Q8VGU2_MOUSE|122-129
WT	263.6	NA	SALSTSPL	sp|Q8BH52|CR3L2_MOUSE|244-251
WT	444.3	NA	TIVFLLQL	sp|Q8R3S2|TSN33_MOUSE|102-109
WT	481.8	NA	SILSGASL	sp|Q9QYX7|PCLO_MOUSE|2044-2051
WT	428.1	NA	FGLVFDHV	sp|Q9CYT6|CAP2_MOUSE|380-387,tr|D3YTR7|D3YTR7_MOUSE|268-275
WT	270.5	NA	MGFWAPLV	sp|Q8R1T1|CHMP7_MOUSE|53-60
WT	21.4	NA	ITFLSLKL	sp|Q8BQZ4|RLGPB_MOUSE|643-650,tr|A2ACC7|A2ACC7_MOUSE|331-338,tr|A2ACC6|A2ACC6_MOUSE|653-660,tr|E9Q0J2|E9Q0J2_MOUSE|665-672,tr|F8WHN4|F8WHN4_MOUSE|653-660
WT	95.3	NA	LNFDRTFL	sp|O88410|CXCR3_MOUSE|48-55
WT	416.7	NA	QIVGYRNL	sp|Q3V1U8|ELMD1_MOUSE|108-115,tr|E9Q0K9|E9Q0K9_MOUSE|108-115
WT	3.2	NA	SIYRFLSL	sp|P20239|ZP2_MOUSE|17-24,tr|Q3UX44|Q3UX44_MOUSE|17-24,tr|A0A140LIR5|A0A140LIR5_MOUSE|17-24
WT	182.3	NA	SVYRCGGF	sp|P43430|MCPT8_MOUSE|45-52
WT	315.2	NA	RQRFHFTL	tr|A2AEE7|A2AEE7_MOUSE|1384-1391
WT	149.9	NA	VTPNLPNL	sp|Q9DBB1|DUS6_MOUSE|239-246,tr|Q7TNL7|Q7TNL7_MOUSE|304-311
WT	355.3	NA	GQYVCSPL	sp|P61406|EST1A_MOUSE|551-558,tr|F6WT10|F6WT10_MOUSE|13-20
WT	344.8	NA	IYYSSTLF	tr|E9Q5P8|E9Q5P8_MOUSE|250-257
WT	82.5	NA	ISIETAQL	sp|A2ATU0|DHTK1_MOUSE|131-138
WT	463.1	NA	LSLIVMLL	sp|Q5PRF0|HTR5A_MOUSE|979-986
WT	313.5	NA	VLWALLTL	sp|O55017|CAC1B_MOUSE|1344-1351,sp|P97445|CAC1A_MOUSE|1397-1404,tr|A2AIS0|A2AIS0_MOUSE|1339-1346,tr|A2AIR9|A2AIR9_MOUSE|1340-1347,tr|E9Q1R5|E9Q1R5_MOUSE|1350-1357,tr|A2AIR7|A2AIR7_MOUSE|1345-1352
WT	258.2	NA	ATFIREVL	sp|P22437|PGH1_MOUSE|107-114
WT	279.1	NA	RTLYHLGM	sp|P31428|DPEP1_MOUSE|154-161
WT	24.8	NA	RTSFYLPL	sp|Q5EBH1|RASF5_MOUSE|272-279,tr|D3Z6G2|D3Z6G2_MOUSE|272-279
WT	364.4	NA	STFRQGLV	sp|O35594|IFT81_MOUSE|84-91,tr|D3Z5A8|D3Z5A8_MOUSE|84-91
WT	135.5	NA	VAFLNVSV	sp|Q80XH4|WSCD1_MOUSE|502-509
WT	99.3	NA	STILHLLL	sp|Q6NVG1|LPCT4_MOUSE|434-441
WT	134.8	NA	STYSLFVF	sp|Q3UVK0|ERMP1_MOUSE|891-898
WT	258.9	NA	ISMENVPM	sp|Q04690|NF1_MOUSE|2468-2475,tr|Q5SYH9|Q5SYH9_MOUSE|452-459
WT	477.2	NA	LSFSMQVF	tr|K7N712|K7N712_MOUSE|783-790,tr|L7N269|L7N269_MOUSE|783-790,tr|E9Q0M3|E9Q0M3_MOUSE|785-792,tr|E9Q0K5|E9Q0K5_MOUSE|783-790,tr|K7N6V2|K7N6V2_MOUSE|783-790,tr|E9PXJ8|E9PXJ8_MOUSE|783-790,tr|L7N2B8|L7N2B8_MOUSE|783-790,tr|G3UZC7|G3UZC7_MOUSE|778-785
WT	25.3	NA	VSLFVGGL	sp|Q6P5E8|DGKQ_MOUSE|491-498
WT	280.9	NA	MNFFRFSH	tr|Q9EPS9|Q9EPS9_MOUSE|175-182
WT	432.1	NA	FGGCFAQM	tr|Q8VEW1|Q8VEW1_MOUSE|113-120,tr|Q7TRU4|Q7TRU4_MOUSE|94-101,tr|Q8VFZ4|Q8VFZ4_MOUSE|106-113
WT	247.3	NA	IPFFYMTA	sp|Q8BGC9|CREG2_MOUSE|168-175
WT	442.9	NA	LANLYHHV	sp|Q921C5|BICD2_MOUSE|536-543,tr|D3Z390|D3Z390_MOUSE|462-469
WT	457.6	NA	VFPSRHPL	sp|Q8C5U4|CQ074_MOUSE|392-399
WT	54.9	NA	LQITFGHL	tr|F8VPU6|F8VPU6_MOUSE|1649-1656
WT	202.7	NA	SAKPYAHI	sp|P97480|EYA3_MOUSE|57-64,tr|Q6P4T3|Q6P4T3_MOUSE|73-80,tr|A2A953|A2A953_MOUSE|73-80
WT	340.9	NA	RVRRYLYV	sp|P70270|RAD54_MOUSE|534-541
WT	49.6	NA	IAYILKQM	sp|P49194|RET3_MOUSE|242-249,tr|A0A0R4J0H3|A0A0R4J0H3_MOUSE|242-249
WT	113	NA	ILFKVALM	sp|Q8BML1|MICA2_MOUSE|165-172,tr|D3YVQ9|D3YVQ9_MOUSE|165-172
WT	22.9	NA	SSIEFTGV	tr|E9PZ36|E9PZ36_MOUSE|2996-3003
WT	30.7	NA	VNIIVARL	tr|D3Z1A5|D3Z1A5_MOUSE|295-302
WT	210.3	NA	DVFAFQVL	tr|E9PXX9|E9PXX9_MOUSE|260-267
WT	129	NA	KAFSQFSM	sp|Q80W31|ZN569_MOUSE|354-361
WT	400.8	NA	VSNAWALV	sp|A2ASA8|IPIL1_MOUSE|318-325
WT	127.7	NA	SYLFSSIM	tr|Q8R293|Q8R293_MOUSE|246-253
WT	156.8	NA	TFFAMLAL	tr|Q3U466|Q3U466_MOUSE|234-241,tr|F6SXC2|F6SXC2_MOUSE|117-124
WT	409.4	NA	YAAFAAEL	sp|Q5U430|UBR3_MOUSE|569-576,tr|F6QC57|F6QC57_MOUSE|568-575
WT	92.4	NA	MMYVVTVL	tr|L7N1X5|L7N1X5_MOUSE|33-40
WT	13.5	NA	VTFTFMSA	tr|Q91XW9|Q91XW9_MOUSE|707-714
WT	440.3	NA	ASWTLEEL	sp|Q8BZQ7|ANC2_MOUSE|689-696
WT	450.9	NA	FLSNFSFL	tr|A0A0J9YUE7|A0A0J9YUE7_MOUSE|53-60,tr|E9PXB8|E9PXB8_MOUSE|53-60,tr|Q7TQW4|Q7TQW4_MOUSE|67-74
WT	124.1	NA	LIFISYVL	tr|Q62007|Q62007_MOUSE|212-219
WT	79.2	NA	SMVRLLNL	sp|Q5SSE9|ABCAD_MOUSE|2489-2496
WT	235.5	NA	VAPAVGPL	sp|P83741|WNK1_MOUSE|1809-1816
WT	32.8	NA	VVFLFNGA	sp|Q3UVK0|ERMP1_MOUSE|237-244,tr|F6TQS9|F6TQS9_MOUSE|50-57
WT	289.3	NA	ISNQYFSF	tr|F8VQB9|F8VQB9_MOUSE|302-309
WT	439	NA	IFTFNFTI	tr|A0A140LJ72|A0A140LJ72_MOUSE|6991-6998,tr|A0A140LI05|A0A140LI05_MOUSE|1079-1086
WT	276.6	NA	VALRLTLV	sp|Q8JZM4|DNER_MOUSE|294-301
WT	420.7	NA	IIMASGEL	sp|Q61549|AGRE1_MOUSE|634-641
WT	118.9	NA	IMITNFEL	sp|Q6P9J9|ANO6_MOUSE|533-540
WT	23.4	NA	SLIRFTLL	sp|A2AED3|FNDC7_MOUSE|10-17,tr|J3QMB8|J3QMB8_MOUSE|10-17
WT	259	NA	VIYVYRRW	tr|Q8BJ95|Q8BJ95_MOUSE|478-485
WT	189.1	NA	FSYCVGNV	sp|Q4KL25|TMHS_MOUSE|65-72
WT	102.5	NA	IQVLFTAV	sp|Q9JIF3|GTR8_MOUSE|302-309,tr|A0A0A6YX81|A0A0A6YX81_MOUSE|38-45
WT	439.7	NA	KHFYYFVT	sp|Q8VE04|MOB3B_MOUSE|187-194,sp|Q8BSU7|MOB3A_MOUSE|188-195
WT	111.7	NA	VLFVLARF	sp|Q9R1W3|RN103_MOUSE|14-21,tr|D3Z0Y5|D3Z0Y5_MOUSE|14-21
WT	420	NA	SFVLYGAI	sp|E9Q3T6|PRD14_MOUSE|193-200
WT	212.3	NA	VFFLQVLM	tr|E9Q2C2|E9Q2C2_MOUSE|54-61
WT	146.6	NA	SVFWISGF	sp|Q3V0Q1|DYH12_MOUSE|2933-2940,tr|F6QA95|F6QA95_MOUSE|1187-1194
WT	104.1	NA	VTAFCLAL	tr|Q8BUG8|Q8BUG8_MOUSE|402-409,tr|E9PUP3|E9PUP3_MOUSE|474-481
WT	282.2	NA	ISKRISFL	sp|P97295|NPY2R_MOUSE|160-167,tr|Q3SWR9|Q3SWR9_MOUSE|47-54
WT	143.4	NA	VVIERYHI	sp|Q61576|FKB10_MOUSE|43-50,tr|F6W360|F6W360_MOUSE|23-30,tr|A2A4H9|A2A4H9_MOUSE|43-50
WT	212.2	NA	SVFFSETV	sp|Q8BZB3|TM266_MOUSE|147-154
WT	323.7	NA	LHALFPLM	sp|Q8VI75|IPO4_MOUSE|292-299,tr|Q5U4C5|Q5U4C5_MOUSE|292-299
WT	392.5	NA	STFSYYGK	sp|Q0P5V9|S45A4_MOUSE|443-450,tr|F7BEQ1|F7BEQ1_MOUSE|379-386
WT	218.7	NA	LVYFAKKM	tr|E9Q7N9|E9Q7N9_MOUSE|107-114
WT	177.4	NA	SQEYYTAL	sp|Q8VEM1|GOLI_MOUSE|31-38,tr|Q5SVR5|Q5SVR5_MOUSE|31-38
WT	392.4	NA	HLYNLVHL	sp|Q80TM9|NISCH_MOUSE|332-339,tr|F6PY46|F6PY46_MOUSE|94-101
WT	122.7	NA	VFSSFPPI	sp|A2ASS6|TITIN_MOUSE|6406-6413,tr|E9Q8N1|E9Q8N1_MOUSE|5512-5519,tr|E9Q8K5|E9Q8K5_MOUSE|5512-5519,tr|F7CR78|F7CR78_MOUSE|2183-2190
WT	70.4	NA	FAFNVTHL	sp|Q8K259|GIN1_MOUSE|270-277
WT	104	NA	ETFEHMPL	sp|Q3V0Y1|SMEK3_MOUSE|130-137
WT	147.5	NA	YFRFRGRL	sp|Q8BTN6|LENG9_MOUSE|117-124
WT	185	NA	AAFVVVLL	sp|Q9WVS0|ICOS_MOUSE|149-156,tr|Q5SUZ8|Q5SUZ8_MOUSE|149-156
WT	20.3	NA	VASYFLFL	sp|Q8R4P5|TMC1_MOUSE|179-186
WT	4.5	NA	LTYAFGLL	sp|Q9R1S7|MRP6_MOUSE|1062-1069
WT	444.3	NA	YLLSFFTI	sp|Q8BGK5|S35F1_MOUSE|339-346
WT	494.6	NA	KHWWIRLL	sp|Q7TPQ3|SHPRH_MOUSE|864-871
WT	95.7	NA	MTPFLSAL	sp|Q9DA37|SAMD8_MOUSE|160-167,tr|Q3UH82|Q3UH82_MOUSE|97-104
WT	26.5	NA	SFTFFNSM	sp|P70314|PITX1_MOUSE|199-206
WT	22.3	NA	TMATFPHL	sp|Q8JZN7|MIRO2_MOUSE|574-581,tr|H3BKJ1|H3BKJ1_MOUSE|364-371
WT	93.2	NA	YVCHYAGL	tr|B9EJX2|B9EJX2_MOUSE|776-783,tr|B1AV60|B1AV60_MOUSE|797-804
WT	92.2	NA	SALARFLL	sp|Q9JHG7|PK3CG_MOUSE|675-682
WT	30.2	NA	IFFVSAGL	sp|O88602|CCG2_MOUSE|140-147,sp|Q9JJV5|CCG3_MOUSE|140-147,tr|S4R2R7|S4R2R7_MOUSE|112-119
WT	15.5	NA	VGSFFCPL	sp|Q7TQ65|TMC4_MOUSE|526-533,tr|D3YWB3|D3YWB3_MOUSE|459-466,tr|F8VQ45|F8VQ45_MOUSE|526-533
WT	430.1	NA	MAYDRFVA	sp|Q8VG03|OL482_MOUSE|121-128,sp|Q0VAX9|OLF18_MOUSE|140-147,sp|Q8VFD3|OL484_MOUSE|121-128,sp|Q8VG07|OL494_MOUSE|121-128,sp|Q8VGS3|O1019_MOUSE|118-125,sp|Q8VF12|OL495_MOUSE|121-128,sp|Q8VFM9|OLF24_MOUSE|118-125,sp|Q8VF13|O1094_MOUSE|130-137,sp|Q60888|OL149_MOUSE|116-123,sp|Q8VEW2|OL498_MOUSE|121-128,sp|Q7TRF3|OL867_MOUSE|118-125,sp|Q8VFD1|OL492_MOUSE|121-128,sp|Q8VEW6|OL510_MOUSE|121-128,tr|Q920P2…
WT	448.4	NA	LVAFLGYL	sp|Q8VI59|PCX3_MOUSE|802-809,tr|F7AXS1|F7AXS1_MOUSE|128-135,tr|F6VNK1|F6VNK1_MOUSE|93-100,tr|F7DCB1|F7DCB1_MOUSE|223-230
WT	157.9	NA	GQFGFQRL	tr|V9GX34|V9GX34_MOUSE|3317-3324
WT	69.9	NA	PVYLYYEL	sp|Q8BHG3|CC50B_MOUSE|107-114
WT	296.6	NA	VGFCFVCA	sp|Q6P2L6|NSD3_MOUSE|862-869,tr|D3Z197|D3Z197_MOUSE|872-879,tr|D3Z357|D3Z357_MOUSE|872-879
WT	308.6	NA	AGVLLATL	sp|Q8R239|CI091_MOUSE|133-140,tr|Z4YLK8|Z4YLK8_MOUSE|133-140,tr|Z4YMT7|Z4YMT7_MOUSE|133-140
WT	11.7	NA	AAFTYAII	sp|P24383|WNT7A_MOUSE|104-111
WT	42.2	NA	SLFALQNL	sp|O55144|TLX3_MOUSE|267-274,sp|P43345|TLX1_MOUSE|304-311,sp|Q61663|TLX2_MOUSE|258-265,tr|G3UXB9|G3UXB9_MOUSE|63-70,tr|Q9QX99|Q9QX99_MOUSE|305-312
WT	239.7	NA	IYIHGHFL	sp|O88875|BY55_MOUSE|124-131,tr|E9Q0X3|E9Q0X3_MOUSE|124-131
WT	354.1	NA	MNFTAENI	sp|Q8K2W3|TXD11_MOUSE|305-312,tr|Q3TWZ5|Q3TWZ5_MOUSE|305-312
WT	114.1	NA	VVQMFQLV	sp|Q9EQJ9|MAGI3_MOUSE|476-483,tr|G5E8T6|G5E8T6_MOUSE|476-483
WT	402	NA	IFSFEVNV	sp|P21180|CO2_MOUSE|291-298,tr|B8JJN2|B8JJN2_MOUSE|154-161
WT	285.7	NA	SYRRLWTL	tr|A2A4U6|A2A4U6_MOUSE|635-642
WT	137.4	NA	VNAYPFTL	sp|Q9EQP6|ARRC_MOUSE|107-114,tr|E9PXD3|E9PXD3_MOUSE|108-115
WT	34.6	NA	LMVLFSLL	sp|P55772|ENTP1_MOUSE|480-487,tr|Q8CDV7|Q8CDV7_MOUSE|509-516
WT	39.5	NA	AAFTLAHI	sp|Q80TA1|EPT1_MOUSE|353-360
WT	3.8	NA	VIFCYMGL	sp|Q8BZ00|SL9A9_MOUSE|375-382
WT	199.7	NA	VIMLMELL	sp|Q8VG43|OL472_MOUSE|79-86,sp|Q8VFC9|OL474_MOUSE|79-86
WT	291.6	NA	VSQLVHSL	sp|Q6KCD5|NIPBL_MOUSE|62-69
WT	76.6	NA	TVLSYVYI	tr|Q9EPG2|Q9EPG2_MOUSE|214-221
WT	207.3	NA	SAWKRRTL	sp|F7A4A7|OTOGL_MOUSE|599-606
WT	37.1	NA	SCIRFINL	sp|Q91Z69|SRGP1_MOUSE|502-509,sp|Q812A2|SRGP3_MOUSE|525-532,tr|D3YZW1|D3YZW1_MOUSE|525-532,tr|E9PYS6|E9PYS6_MOUSE|537-544,tr|B1AUY3|B1AUY3_MOUSE|547-554,tr|E9Q4R3|E9Q4R3_MOUSE|537-544,tr|Q3TE27|Q3TE27_MOUSE|349-356,tr|Q80Z68|Q80Z68_MOUSE|537-544,tr|B1AUX5|B1AUX5_MOUSE|516-523,tr|F8VPQ4|F8VPQ4_MOUSE|525-532,tr|B1AUY2|B1AUY2_MOUSE|537-544,tr|E9QN14|E9QN14_MOUSE|501-508,tr|F6SL55|F6SL55_MOUSE|41-48
WT	490.5	NA	FSFTWSSS	sp|Q3UKU4|FA83F_MOUSE|253-260,tr|A0A0R4J033|A0A0R4J033_MOUSE|253-260
WT	393.7	NA	VTFNYSAH	sp|Q30D77|COOA1_MOUSE|154-161
WT	192.1	NA	VNVISRPL	tr|A8R0V5|A8R0V5_MOUSE|67-74
WT	456.9	NA	LIFPCYWL	sp|Q9JJY3|NSMA2_MOUSE|23-30
WT	16.1	NA	TNMPFVGL	sp|A2ABV5|MED14_MOUSE|656-663,tr|A2BDP0|A2BDP0_MOUSE|17-24,tr|A2BDN7|A2BDN7_MOUSE|656-663
WT	95.8	NA	YVLSFAII	sp|O08967|CYH3_MOUSE|191-198,sp|Q9QX11|CYH1_MOUSE|187-194,tr|Q3TZ02|Q3TZ02_MOUSE|189-196,tr|A2A517|A2A517_MOUSE|201-208,tr|G5E8Q4|G5E8Q4_MOUSE|143-150
WT	272	NA	TLAVYQGL	sp|E9Q355|CTSG1_MOUSE|674-681,sp|C6KI89|CTSG2_MOUSE|674-681,tr|A0A140LJ05|A0A140LJ05_MOUSE|501-508,tr|A0A140LI52|A0A140LI52_MOUSE|674-681
WT	139.2	NA	IHFVRVLF	sp|Q9D4I2|MEII1_MOUSE|138-145,tr|F8WHB9|F8WHB9_MOUSE|87-94
WT	104.8	NA	SWRSFFNL	sp|Q811P8|RHG32_MOUSE|659-666
WT	74.1	NA	SVYAKYYF	sp|Q8BGU5|CCNY_MOUSE|269-276,tr|D3YUJ3|D3YUJ3_MOUSE|295-302,tr|E9Q226|E9Q226_MOUSE|219-226
WT	74	NA	SVERFVQL	tr|K7N5Y9|K7N5Y9_MOUSE|227-234,tr|Q8C6S1|Q8C6S1_MOUSE|227-234,tr|D3YUK0|D3YUK0_MOUSE|424-431,tr|L7N469|L7N469_MOUSE|227-234,tr|E9PWI7|E9PWI7_MOUSE|424-431
WT	16.8	NA	LSPLFGTL	sp|Q8BJ37|TYDP1_MOUSE|190-197,tr|B8JJC1|B8JJC1_MOUSE|190-197
WT	68.7	NA	MLFEHSEL	sp|P97393|RHG05_MOUSE|493-500,tr|E9PYT0|E9PYT0_MOUSE|493-500
WT	116.7	NA	SLDFYANV	sp|Q62230|SN_MOUSE|504-511,tr|G3X8X6|G3X8X6_MOUSE|510-517,tr|H9KUZ3|H9KUZ3_MOUSE|510-517
WT	304.3	NA	TQLCWPLL	sp|Q924C1|XPO5_MOUSE|1049-1056
WT	10.4	NA	SMLRFPQL	sp|P98200|AT8A2_MOUSE|899-906
WT	386.4	NA	AAYFLAAC	sp|O88627|S28A2_MOUSE|92-99,tr|A2AWR5|A2AWR5_MOUSE|92-99
WT	99.6	NA	KNPLFVQM	sp|A2AJL3|FGGY_MOUSE|461-468,tr|A2AJL4|A2AJL4_MOUSE|373-380,tr|F6V664|F6V664_MOUSE|103-110
WT	410.4	NA	LQNCFTLL	sp|P42228|STAT4_MOUSE|259-266,tr|Q3V157|Q3V157_MOUSE|258-265
WT	2.6	NA	ITFSYFQL	sp|Q769J6|ATS13_MOUSE|678-685,tr|A2ALB3|A2ALB3_MOUSE|678-685
WT	374.8	NA	LALMQAPV	sp|A2ARS0|ANR63_MOUSE|313-320
WT	350.7	NA	VLVTFSIV	sp|Q9ERK7|ACHB2_MOUSE|306-313,sp|Q8R493|ACHB4_MOUSE|303-310,tr|A0A0G2JG64|A0A0G2JG64_MOUSE|306-313
WT	218.5	NA	RAYALCVL	sp|Q9ES52|SHIP1_MOUSE|41-48
WT	4.5	NA	FSFVFGAL	sp|Q8QZW7|GBRP_MOUSE|314-321
WT	195.9	NA	VYHLLYNM	sp|O70566|DIAP2_MOUSE|407-414,tr|Q6W4W7|Q6W4W7_MOUSE|411-418,tr|E9Q4U7|E9Q4U7_MOUSE|411-418
WT	188.1	NA	AVIGFGVL	sp|Q8R0N9|ZDHC1_MOUSE|60-67
WT	22.9	NA	LSYHRNPL	sp|Q9DBT5|AMPD2_MOUSE|662-669,tr|A2AE27|A2AE27_MOUSE|688-695
WT	181.8	NA	LAYLVGVL	tr|D6RIL8|D6RIL8_MOUSE|192-199
WT	18.4	NA	VTFLLPSM	tr|Q8CET2|Q8CET2_MOUSE|400-407
WT	4.7	NA	SSFLFAII	tr|D3Z2X2|D3Z2X2_MOUSE|2288-2295
WT	160.3	NA	ASWACGSL	tr|Q8VES9|Q8VES9_MOUSE|146-153
WT	26.9	NA	VIYDMNSL	sp|P37238|PPARG_MOUSE|276-283,tr|M1VPI1|M1VPI1_MOUSE|246-253,tr|Q6GU14|Q6GU14_MOUSE|276-283
WT	96.6	NA	QVYTRHPL	sp|Q9CWR8|DNM3L_MOUSE|94-101
WT	171	NA	LQDFFAAL	sp|Q9R1M5|NALP5_MOUSE|551-558
WT	130.4	NA	SMFEMMDM	sp|Q9D581|EFC10_MOUSE|71-78
WT	267.3	NA	IILLNFCL	sp|Q8CGM1|AGRB2_MOUSE|961-968,tr|H7BWZ2|H7BWZ2_MOUSE|961-968,tr|H7BX92|H7BX92_MOUSE|906-913,tr|H7BX74|H7BX74_MOUSE|961-968,tr|B1ASC0|B1ASC0_MOUSE|906-913
WT	322.2	NA	LSYITLEI	sp|Q5DU41|LRC8B_MOUSE|280-287
WT	71.8	NA	SSFTKSPV	sp|Q3UWZ0|TRI75_MOUSE|329-336
WT	369.5	NA	IYHFYHNS	tr|A0A140LIV1|A0A140LIV1_MOUSE|1714-1721
WT	148.1	NA	SFFLSQML	sp|Q9ES34|UBE3B_MOUSE|800-807
WT	358.5	NA	YTVFAPLL	tr|Q8VGE7|Q8VGE7_MOUSE|275-282
WT	222.6	NA	VNFFPDSM	sp|O89050|MKLN1_MOUSE|715-722
WT	60.9	NA	SWFPFYYM	tr|G3X8R0|G3X8R0_MOUSE|108-115
WT	18.4	NA	VAFTIPSL	sp|Q8K561|OTOAN_MOUSE|81-88,tr|E9PVT3|E9PVT3_MOUSE|81-88
WT	270.3	NA	AFKALAPL	sp|Q8BI69|ZN784_MOUSE|136-143
WT	491.8	NA	IVMSRQHI	sp|Q5U462|CDCP1_MOUSE|58-65
WT	240.8	NA	STMVFSWF	sp|Q6R5N8|TLR13_MOUSE|795-802
WT	461.2	NA	VVERLLSL	sp|Q9WVM1|RGAP1_MOUSE|528-535
WT	37.9	NA	LSVLWALL	tr|B2RUD9|B2RUD9_MOUSE|21-28,tr|Q8CGQ2|Q8CGQ2_MOUSE|21-28
WT	279.1	NA	AVRCFALF	sp|Q8CIP5|DISP2_MOUSE|569-576
WT	52.8	NA	ARRFFAPL	sp|Q8K2I4|MANBA_MOUSE|684-691,tr|A0A0R4J092|A0A0R4J092_MOUSE|684-691
WT	129.4	NA	VLVEFSSV	sp|Q8CCE9|E4F1_MOUSE|627-634
WT	423.1	NA	YSNFWCGI	sp|A3KGW5|GT253_MOUSE|174-181,sp|Q6NVG7|GT252_MOUSE|198-205,tr|D6RCH2|D6RCH2_MOUSE|198-205
WT	119.8	NA	GGYFLPRL	sp|Q8QZS1|HIBCH_MOUSE|179-186,tr|E0CX19|E0CX19_MOUSE|179-186
WT	39.2	NA	VGVIYNPV	sp|Q6P5C5|SMUG1_MOUSE|53-60
WT	93.3	NA	VLFAVGGL	sp|Q9QZS7|NPHN_MOUSE|1079-1086
WT	167.6	NA	QHFRWVQL	sp|B9EJA2|CTTB2_MOUSE|1252-1259,tr|F6Q1W8|F6Q1W8_MOUSE|743-750
WT	381.4	NA	LLPYFPTI	sp|Q8VI75|IPO4_MOUSE|515-522,tr|Q5U4C5|Q5U4C5_MOUSE|515-522
WT	372.2	NA	MVPWISLL	sp|Q9D2V8|MFS10_MOUSE|203-210,tr|D3YYM9|D3YYM9_MOUSE|203-210,tr|A0A0J9YUD0|A0A0J9YUD0_MOUSE|23-30,tr|D3YWD5|D3YWD5_MOUSE|203-210,tr|A0A0J9YUD3|A0A0J9YUD3_MOUSE|30-37
WT	334.3	NA	SAFATYKV	tr|D3YWT3|D3YWT3_MOUSE|421-428,tr|Q80WT9|Q80WT9_MOUSE|438-445,tr|A0A0R4J1G0|A0A0R4J1G0_MOUSE|426-433
WT	399.8	NA	MWHMLSHL	tr|Q6PDK0|Q6PDK0_MOUSE|496-503
WT	48	NA	VSMFTLPV	sp|Q8K0T0|RTN1_MOUSE|734-741,tr|A3QM89|A3QM89_MOUSE|207-214,tr|Q7M6W1|Q7M6W1_MOUSE|162-169
WT	384.7	NA	FYPQYGAL	sp|Q8BX02|KANK2_MOUSE|107-114
WT	13.1	NA	IGLYFAWL	sp|A2AHL1|ANO3_MOUSE|392-399,sp|Q8CFW1|ANO2_MOUSE|359-366,sp|Q8C5H1|ANO4_MOUSE|347-354,tr|E0CZF2|E0CZF2_MOUSE|329-336,tr|F6UR69|F6UR69_MOUSE|29-36,tr|S4R1L3|S4R1L3_MOUSE|312-319,tr|A2AHK9|A2AHK9_MOUSE|48-55
WT	49.5	NA	TAALYGRL	sp|Q8CIF4|BTD_MOUSE|509-516,tr|A0A0R4J131|A0A0R4J131_MOUSE|518-525
WT	79.9	NA	LVFVRNLL	sp|P97325|SIAT6_MOUSE|4-11,tr|Q9CZ48|Q9CZ48_MOUSE|4-11
WT	431.9	NA	VRQRFSRL	sp|O09117|SYPL1_MOUSE|8-15
WT	365	NA	FSLNMYEM	sp|Q80VA5|S3TC2_MOUSE|1178-1185
WT	130.8	NA	QTFLIRGL	sp|Q3TAP4|AP5B1_MOUSE|481-488
WT	127.8	NA	IFFCIGLL	tr|B1AWN4|B1AWN4_MOUSE|317-324
WT	228	NA	CLRVYAGL	sp|Q9JJT2|GFRA4_MOUSE|165-172
WT	113.4	NA	YSLFKAKL	sp|Q9D6I7|FA69A_MOUSE|154-161,tr|D3YW04|D3YW04_MOUSE|109-116
WT	124.6	NA	IIVSSYAL	tr|E9PV37|E9PV37_MOUSE|223-230
WT	277.3	NA	SYKRLIQL	tr|E9PVZ3|E9PVZ3_MOUSE|54-61,tr|A0A0G2JDK7|A0A0G2JDK7_MOUSE|54-61
WT	53.6	NA	VQFLSGLL	sp|Q5SSZ5|TENS3_MOUSE|160-167
WT	335.8	NA	LSYLENGV	tr|A0A140LJ69|A0A140LJ69_MOUSE|1559-1566
WT	49.9	NA	VSGYHYGL	sp|P45448|NR5A2_MOUSE|114-121,sp|P33242|STF1_MOUSE|20-27,tr|A0A0A6YY04|A0A0A6YY04_MOUSE|93-100,tr|A0A0A6YWQ4|A0A0A6YWQ4_MOUSE|53-60,tr|Q1WLP7|Q1WLP7_MOUSE|53-60
WT	401.7	NA	YSLRYKDV	tr|Q8VFQ7|Q8VFQ7_MOUSE|290-297
WT	157.8	NA	LALYLKPL	sp|P0C090|RC3H2_MOUSE|105-112,sp|Q4VGL6|RC3H1_MOUSE|106-113,tr|A0A0N4SVF7|A0A0N4SVF7_MOUSE|105-112,tr|H7BX02|H7BX02_MOUSE|106-113,tr|A2AVP4|A2AVP4_MOUSE|105-112
WT	388.2	NA	AMHVHGSL	sp|P28825|MEP1A_MOUSE|712-719,tr|A0A0R4J043|A0A0R4J043_MOUSE|725-732
WT	102.2	NA	SFVWQMSL	tr|A2ARC1|A2ARC1_MOUSE|195-202
WT	131.4	NA	IMFLFVLA	sp|Q8VDZ4|ZDHC5_MOUSE|53-60
WT	51.3	NA	IFFCFSSF	sp|P70188|KIFA3_MOUSE|200-207
WT	49.2	NA	EVYLFSHI	tr|F8VQ70|F8VQ70_MOUSE|803-810
WT	359.8	NA	VTWAPAAV	sp|Q8CGN5|PLIN1_MOUSE|352-359,tr|A0A0U1RNP7|A0A0U1RNP7_MOUSE|42-49
WT	493	NA	FFPSFCML	sp|Q8BKW4|ZCHC4_MOUSE|325-332
WT	483.2	NA	ISPPAPFL	sp|Q8BGS1|E41L5_MOUSE|697-704
WT	31.7	NA	SALPFSQM	sp|Q8R5H6|WASF1_MOUSE|253-260
WT	52.6	NA	TMLNRFAL	sp|A2AJN7|S4A11_MOUSE|128-135,tr|A2AJN8|A2AJN8_MOUSE|128-135
WT	120.3	NA	GSFLAANM	sp|Q8BZ21|KAT6A_MOUSE|1343-1350,tr|G3X940|G3X940_MOUSE|1343-1350
WT	312.1	NA	IVYANLKI	sp|Q504P2|CL12A_MOUSE|5-12,tr|D3YXD8|D3YXD8_MOUSE|5-12,tr|A0A0R4J0T2|A0A0R4J0T2_MOUSE|5-12
WT	111.5	NA	VLFELKLL	sp|Q8BJ71|NUP93_MOUSE|495-502
WT	454.4	NA	NTQQFVTL	sp|Q924Z6|XPO6_MOUSE|646-653
WT	102.2	NA	GTILFMYL	sp|Q8VFK7|O1020_MOUSE|260-267
WT	284.5	NA	VALFFTLS	tr|E9Q468|E9Q468_MOUSE|277-284
WT	127.7	NA	VSYFHCMN	sp|Q9QYC7|VKGC_MOUSE|283-290
WT	446.8	NA	VSYQIVPS	sp|Q80TF3|PCD19_MOUSE|488-495,tr|A2AGW4|A2AGW4_MOUSE|31-38,tr|E9Q5E1|E9Q5E1_MOUSE|488-495
WT	342.8	NA	VLISCSGL	sp|Q5XJV6|LMTK3_MOUSE|42-49,tr|A0A0R4J0W7|A0A0R4J0W7_MOUSE|42-49
WT	28.5	NA	VTYKICPI	sp|Q91YQ3|CSDC2_MOUSE|114-121
WT	329.1	NA	YSIFRGYI	sp|Q8R4U0|STAB2_MOUSE|1158-1165
WT	194.1	NA	AHPLYLLL	sp|Q3TAP4|AP5B1_MOUSE|720-727
WT	84.3	NA	IIYMTSMV	tr|Q8VF75|Q8VF75_MOUSE|33-40
WT	139.2	NA	TSFMYVPE	tr|A0A087WSD2|A0A087WSD2_MOUSE|264-271
WT	25.6	NA	VALLAAPL	tr|D3Z2X2|D3Z2X2_MOUSE|1374-1381
WT	15.3	NA	VTVQFRLL	sp|Q9R0M0|CELR2_MOUSE|2303-2310,tr|A2AEE7|A2AEE7_MOUSE|2302-2309,tr|F7BHW1|F7BHW1_MOUSE|291-298
WT	267.6	NA	SLVSWPPL	tr|A0A0A6YXT7|A0A0A6YXT7_MOUSE|73-80
WT	430.6	NA	KAYPKALV	sp|Q5SPX3|RN215_MOUSE|136-143,tr|Z4YMC8|Z4YMC8_MOUSE|136-143
WT	373.4	NA	YSSTIAPL	tr|Q8VGJ6|Q8VGJ6_MOUSE|73-80,tr|Q7TQS3|Q7TQS3_MOUSE|73-80
WT	365.3	NA	LTYKRFQA	sp|Q9R194|CRY2_MOUSE|166-173
WT	133.2	NA	IVFEHLVF	sp|A2AHL1|ANO3_MOUSE|918-925,sp|Q8C5H1|ANO4_MOUSE|889-896,tr|S4R1L3|S4R1L3_MOUSE|854-861
WT	27.1	NA	VMGTFSSL	sp|Q9JJ57|KCIP1_MOUSE|4-11
WT	23.8	NA	TGFYHSEL	sp|Q3UHF3|MIER3_MOUSE|459-466,tr|F7BFR0|F7BFR0_MOUSE|457-464
WT	63.3	NA	LQFLFDVL	sp|Q3TAA7|S11IP_MOUSE|75-82
WT	179	NA	VSSLLSQL	sp|P02468|LAMC1_MOUSE|1508-1515,tr|F8VQJ3|F8VQJ3_MOUSE|1508-1515
WT	54.8	NA	SCWFFSVL	tr|K7N6Y3|K7N6Y3_MOUSE|142-149,tr|K7N6X7|K7N6X7_MOUSE|142-149,tr|L7N273|L7N273_MOUSE|144-151,tr|E9PZR7|E9PZR7_MOUSE|144-151,tr|D3YTX4|D3YTX4_MOUSE|144-151,tr|K7N6J5|K7N6J5_MOUSE|142-149,tr|E9PWL6|E9PWL6_MOUSE|144-151,tr|L7N288|L7N288_MOUSE|142-149,tr|L7N227|L7N227_MOUSE|144-151,tr|E9Q069|E9Q069_MOUSE|144-151,tr|K7N6X3|K7N6X3_MOUSE|142-149,tr|D3YTX5|D3YTX5_MOUSE|142-149,tr|Q8R2B4|Q8R2B4_MOUSE|157-…
WT	335.7	NA	SMAEFLKV	sp|Q8CCF0|PRP31_MOUSE|482-489
WT	338.4	NA	ISHFYSVS	sp|Q8BK03|MIGA2_MOUSE|492-499
WT	118.1	NA	LNMLLPLL	sp|Q8K0B2|LMBD1_MOUSE|349-356
WT	62.8	NA	SFWHHLAL	sp|Q8BZ89|ZN322_MOUSE|117-124,tr|B7ZCB3|B7ZCB3_MOUSE|117-124,tr|B7ZCB1|B7ZCB1_MOUSE|117-124
WT	117.2	NA	VSLPLNTL	sp|Q9DBG3|AP2B1_MOUSE|784-791,tr|H3BKM0|H3BKM0_MOUSE|760-767,tr|H3BIY9|H3BIY9_MOUSE|798-805
WT	109.3	NA	LAISFLFM	sp|G3X982|AOXC_MOUSE|518-525
WT	3.8	NA	MSFLFRIL	sp|Q80X19|COEA1_MOUSE|1289-1296,tr|F7D5Y4|F7D5Y4_MOUSE|29-36,tr|K3W4R4|K3W4R4_MOUSE|1290-1297,tr|B7ZNH7|B7ZNH7_MOUSE|1286-1293
WT	377.7	NA	VLRDLYHL	sp|Q8C3S2|TNG6_MOUSE|1026-1033
WT	91	NA	ILMCFVRI	tr|A0A0J9YV81|A0A0J9YV81_MOUSE|205-212
WT	420.1	NA	KYPDFFAL	tr|E9PWS4|E9PWS4_MOUSE|212-219
WT	259	NA	TARYAAAL	sp|Q9CZT4|RPC5_MOUSE|111-118
WT	12	NA	VAYLSQHL	sp|E9Q4Z2|ACACB_MOUSE|2420-2427
WT	35.9	NA	TSFETALL	sp|O88466|ZN106_MOUSE|1160-1167,tr|R4GML0|R4GML0_MOUSE|1160-1167,tr|E9Q7S1|E9Q7S1_MOUSE|1137-1144
WT	129.3	NA	VFHAFFTI	sp|Q5SWT3|S2535_MOUSE|46-53,tr|A0A0A0MQ70|A0A0A0MQ70_MOUSE|46-53
WT	65.5	NA	MYFFIFNL	tr|E9Q891|E9Q891_MOUSE|65-72,tr|Q9EQB2|Q9EQB2_MOUSE|62-69,tr|Q7TRE5|Q7TRE5_MOUSE|58-65,tr|L7N210|L7N210_MOUSE|65-72,tr|L7N1Z5|L7N1Z5_MOUSE|65-72
WT	208	NA	MATAYMIL	sp|Q0HA38|TT21B_MOUSE|1162-1169,tr|E9PVK4|E9PVK4_MOUSE|1162-1169
WT	326.6	NA	YTLRKFPV	sp|Q63886|UD11_MOUSE|76-83
WT	460.4	NA	KYAFLLDL	sp|Q5SX19|PIGL_MOUSE|190-197
WT	188.1	NA	AFQMFLAL	tr|Q8VFM3|Q8VFM3_MOUSE|98-105
WT	122.9	NA	INWIQQVL	sp|Q9DBI0|TMPS6_MOUSE|803-810
WT	310.4	NA	KTFELISI	sp|B9EKR1|PRPTZ_MOUSE|2197-2204,tr|B2RXS8|B2RXS8_MOUSE|1348-1355
WT	120.5	NA	LLTLFTPL	sp|Q5SZA1|NPT3_MOUSE|131-138
WT	115.9	NA	TMAYLAFL	sp|Q8CIR4|TRPM6_MOUSE|852-859
WT	84.8	NA	WIYLTSNL	tr|A0A0B4J1I7|A0A0B4J1I7_MOUSE|68-75
WT	193	NA	RNMFSHRL	sp|Q91XU3|PI42C_MOUSE|204-211
WT	236.5	NA	IIFLTTLF	sp|B1AZA5|TM245_MOUSE|657-664,tr|D3YWD3|D3YWD3_MOUSE|661-668,tr|B1AZA8|B1AZA8_MOUSE|252-259
WT	264.6	NA	KGVYFIKM	sp|Q69Z23|DYH17_MOUSE|72-79,tr|E9Q7P0|E9Q7P0_MOUSE|72-79,tr|K3W4R0|K3W4R0_MOUSE|72-79
WT	481.9	NA	ANYSDCFL	sp|Q91V95|PTH2R_MOUSE|120-127,tr|D3YV95|D3YV95_MOUSE|115-122
WT	43.7	NA	VLFVKFSM	sp|O88543|CSN3_MOUSE|61-68,tr|F6YCA7|F6YCA7_MOUSE|15-22
WT	62.9	NA	VFLFFYML	tr|A2ASV3|A2ASV3_MOUSE|31-38
WT	471.9	NA	LNMLMLDL	tr|A0A087WQM0|A0A087WQM0_MOUSE|834-841,tr|A0A087WRU0|A0A087WRU0_MOUSE|709-716,tr|A0A087WQ94|A0A087WQ94_MOUSE|709-716,tr|E9Q0S6|E9Q0S6_MOUSE|878-885,tr|A0A087WQS0|A0A087WQS0_MOUSE|878-885
WT	26.2	NA	CGFPFLLL	sp|Q8C1E7|T120A_MOUSE|310-317
WT	349.6	NA	VLLALYLL	sp|P47741|TNR4_MOUSE|229-236,tr|B1ASL3|B1ASL3_MOUSE|229-236
WT	409.9	NA	VQYFIEKV	sp|E9Q7P9|CDHR2_MOUSE|159-166
WT	346	NA	RNVKHFVL	sp|Q8VDW0|DX39A_MOUSE|187-194,tr|D6RHT5|D6RHT5_MOUSE|187-194
WT	236	NA	IQKMFEKL	sp|Q9D964|GATM_MOUSE|379-386
WT	283.8	NA	YYVTYSSM	sp|P70377|FGF13_MOUSE|151-158,tr|B1AU20|B1AU20_MOUSE|93-100
WT	24.4	NA	SIYKISGL	tr|Q8CGQ2|Q8CGQ2_MOUSE|249-256
WT	28.9	NA	LVFRYHVV	sp|Q8R4Y4|STAB1_MOUSE|1642-1649,tr|G3X973|G3X973_MOUSE|1642-1649
WT	370.7	NA	VTLALVIL	tr|Q8VGI8|Q8VGI8_MOUSE|207-214
WT	156.1	NA	KAFHTTTL	tr|Q8BIN6|Q8BIN6_MOUSE|368-375,tr|B9EIT6|B9EIT6_MOUSE|365-372
WT	172	NA	LLYQQYLL	sp|Q8BG36|DMRT2_MOUSE|354-361
WT	488.9	NA	LMFLGSQV	sp|Q9R1I1|CHST4_MOUSE|10-17,tr|A0A0R4J1C9|A0A0R4J1C9_MOUSE|10-17
WT	138.7	NA	VNIPRLLL	tr|Q6NV99|Q6NV99_MOUSE|273-280
WT	79.6	NA	ALFYRHYL	sp|Q91V01|MBOA5_MOUSE|55-62,tr|A0A0N4SUM3|A0A0N4SUM3_MOUSE|55-62
WT	160.9	NA	TTWFKFSV	sp|Q8K157|GALM_MOUSE|334-341
WT	19	NA	VGGLFASL	sp|P57787|MOT4_MOUSE|93-100,tr|B1ATM2|B1ATM2_MOUSE|93-100,tr|B1ATM1|B1ATM1_MOUSE|93-100
WT	390.2	NA	RSISFASC	tr|E9PV95|E9PV95_MOUSE|95-102
WT	367.3	NA	SYVFDKSL	tr|Q6A099|Q6A099_MOUSE|885-892,tr|Q6DFZ1|Q6DFZ1_MOUSE|939-946
WT	173.4	NA	VNSFFCDI	tr|Q8VF22|Q8VF22_MOUSE|178-185
WT	106.8	NA	LGYFIFDL	sp|Q3TYE7|TM136_MOUSE|82-89
WT	35.6	NA	VTQFFPSV	sp|Q8CBX0|CSC1_MOUSE|449-456
WT	365.3	NA	RLYVKQPL	sp|Q9ERC8|DSCAM_MOUSE|307-314
WT	457.4	NA	LLFLVYTL	sp|Q7TML3|S35F2_MOUSE|82-89
WT	113.7	NA	VNEGYARL	sp|Q9JJR7|ASCL3_MOUSE|108-115,tr|M0QWB7|M0QWB7_MOUSE|96-103,tr|M0QW46|M0QW46_MOUSE|75-82
WT	223.1	NA	ISQLMFFM	sp|Q8R526|PK1L1_MOUSE|1289-1296,tr|A0A0A0MQK4|A0A0A0MQK4_MOUSE|1195-1202,tr|A0A0A0MQP1|A0A0A0MQP1_MOUSE|744-751
WT	342.4	NA	FVLCHGLL	sp|Q9EPT5|SO2A1_MOUSE|34-41
WT	409	NA	ILLSIPQL	sp|Q924I3|ACKR4_MOUSE|166-173
WT	123.4	NA	LFITFRLL	tr|Q3TS87|Q3TS87_MOUSE|168-175
WT	104.1	NA	LFVYRPHL	tr|Q8R2Q3|Q8R2Q3_MOUSE|47-54
WT	104.7	NA	LSAIFNNV	sp|Q9JIM1|S29A1_MOUSE|76-83,tr|E9PZV0|E9PZV0_MOUSE|76-83,tr|E9PXQ6|E9PXQ6_MOUSE|76-83,tr|E9PXM6|E9PXM6_MOUSE|76-83,tr|E9Q3D1|E9Q3D1_MOUSE|44-51,tr|E9Q221|E9Q221_MOUSE|76-83,tr|E9PVH9|E9PVH9_MOUSE|76-83,tr|E9Q503|E9Q503_MOUSE|44-51,tr|E9PWD6|E9PWD6_MOUSE|76-83,tr|E9PWY7|E9PWY7_MOUSE|76-83
WT	350.8	NA	VVLIITDL	tr|Q8VF41|Q8VF41_MOUSE|46-53
WT	86	NA	VTIVWIPI	tr|E9QAB5|E9QAB5_MOUSE|410-417
WT	287.9	NA	SLKNFFTM	sp|Q14BI7|TDRD9_MOUSE|632-639,tr|A0A0A6YWV8|A0A0A6YWV8_MOUSE|474-481
WT	437.2	NA	SSLPHAVV	tr|E9Q5K4|E9Q5K4_MOUSE|368-375
WT	432.9	NA	IVFSMMYT	tr|Q7TRG4|Q7TRG4_MOUSE|272-279
WT	468.2	NA	SMTFAEAL	sp|Q8BIP0|SYDM_MOUSE|317-324
WT	429	NA	VSDKYLEI	sp|P48754|BRCA1_MOUSE|1069-1076
WT	380.4	NA	VSLQVSLI	sp|Q9EQH3|VPS35_MOUSE|348-355
WT	233.8	NA	ILLHIPRL	tr|Q8BVD2|Q8BVD2_MOUSE|232-239
WT	234.5	NA	IAFHYKHS	sp|Q9CTN5|S6OS1_MOUSE|62-69,tr|D3YZ78|D3YZ78_MOUSE|100-107,tr|D3YUI5|D3YUI5_MOUSE|62-69,tr|F8WHJ9|F8WHJ9_MOUSE|62-69
WT	78.7	NA	YLLFFRAL	sp|Q8CHK3|MBOA7_MOUSE|82-89,tr|F6UP63|F6UP63_MOUSE|34-41,tr|A0A0U1RPP4|A0A0U1RPP4_MOUSE|82-89
WT	124.1	NA	FAFVEFEL	sp|Q9QZH3|PPIE_MOUSE|49-56
WT	190.3	NA	SSISSSNL	tr|A0A0G2JFC6|A0A0G2JFC6_MOUSE|49-56,tr|A0A075B677|A0A075B677_MOUSE|27-34
WT	140.6	NA	VVSDYAQM	sp|P80315|TCPD_MOUSE|265-272,tr|G5E839|G5E839_MOUSE|235-242
WT	67.1	NA	FNYGMQPL	sp|Q641K1|CBPC1_MOUSE|768-775
WT	303.1	NA	MGVALYTL	sp|Q8BVN3|CTSR4_MOUSE|223-230,tr|B3VNK5|B3VNK5_MOUSE|150-157
WT	343.8	NA	LTLFIRKL	sp|P35969|VGFR1_MOUSE|777-784,tr|A0A0R4J0A4|A0A0R4J0A4_MOUSE|777-784
WT	159	NA	SSYAIILI	tr|Q8VGN8|Q8VGN8_MOUSE|214-221
WT	122.3	NA	VAYNPGVL	sp|Q8CHR9|PIHD2_MOUSE|108-115,tr|D3Z2K7|D3Z2K7_MOUSE|108-115,tr|D3Z3T0|D3Z3T0_MOUSE|124-131,tr|D3YTM2|D3YTM2_MOUSE|108-115
WT	278.7	NA	GGMAFILL	tr|A2ATL1|A2ATL1_MOUSE|186-193,tr|A2ATL0|A2ATL0_MOUSE|306-313,tr|A2ATK9|A2ATK9_MOUSE|311-318
WT	228.5	NA	SYFKTSPM	sp|Q9D4G1|CU062_MOUSE|211-218
WT	315.2	NA	RMPLFFLF	sp|Q60882|OL145_MOUSE|23-30,tr|Q7TRE4|Q7TRE4_MOUSE|23-30,tr|Q7TRE6|Q7TRE6_MOUSE|23-30,tr|Q7TRE5|Q7TRE5_MOUSE|23-30
WT	24.6	NA	SIFILSLL	sp|Q7M707|TR109_MOUSE|250-257
WT	123.9	NA	VVSFAGRL	sp|E2JF22|PIEZ1_MOUSE|596-603,tr|F7AC58|F7AC58_MOUSE|158-165,tr|F6QY99|F6QY99_MOUSE|157-164,tr|E9PUQ9|E9PUQ9_MOUSE|595-602
WT	467.8	NA	SLPCIAPL	sp|Q99NF1|BCDO2_MOUSE|7-14
WT	387.7	NA	ISDLLFLL	sp|P51683|CCR2_MOUSE|99-106,sp|P51682|CCR5_MOUSE|76-83,tr|E9Q3E5|E9Q3E5_MOUSE|76-83
WT	334.6	NA	LTLPFWAV	sp|O54689|CCR6_MOUSE|89-96,sp|Q8BGE9|RL3R1_MOUSE|133-140
WT	215.9	NA	VFVQSYYL	sp|P97471|SMAD4_MOUSE|406-413
WT	72.7	NA	SLMEFTHI	sp|Q14BI7|TDRD9_MOUSE|246-253,tr|A0A0A6YY15|A0A0A6YY15_MOUSE|88-95,tr|A0A0A6YWV8|A0A0A6YWV8_MOUSE|88-95
WT	10.2	NA	VGPMFLYL	sp|Q61093|CY24B_MOUSE|274-281
WT	355.1	NA	LNPLLYLL	sp|Q3UVD5|LGR6_MOUSE|822-829,tr|D3Z6S4|D3Z6S4_MOUSE|545-552
WT	212.1	NA	SAMCFMDF	tr|B2RXA8|B2RXA8_MOUSE|178-185
WT	13.6	NA	GMFSFTGL	sp|P05201|AATC_MOUSE|359-366
WT	179.3	NA	LTPVFDAL	sp|Q64464|CP3AD_MOUSE|229-236
WT	289.9	NA	YTLLITGL	sp|Q9DBN5|LONP2_MOUSE|98-105
WT	149.7	NA	VFFLAVLL	tr|J3QMN6|J3QMN6_MOUSE|522-529
WT	258.4	NA	LVYCRLHF	sp|Q9Z0S2|LHX2_MOUSE|162-169,tr|F6SM03|F6SM03_MOUSE|121-128,tr|F6Z9H5|F6Z9H5_MOUSE|121-128
WT	145	NA	MAITQFRL	sp|Q9D0V7|RCAS1_MOUSE|1-8
WT	120.4	NA	VWVEFTKL	sp|Q71RI9|KAT3_MOUSE|53-60,tr|A0A0G2JGE1|A0A0G2JGE1_MOUSE|18-25,tr|D6RJ70|D6RJ70_MOUSE|18-25
WT	96.1	NA	KVYLKAPM	sp|Q08024|PEBB_MOUSE|94-101
WT	255.2	NA	VAFSEFFF	sp|P55065|PLTP_MOUSE|266-273,tr|A2A5K2|A2A5K2_MOUSE|214-221
WT	205.1	NA	IGYVYRLP	sp|Q9ESB3|HRG_MOUSE|455-462,tr|A0A0R4J039|A0A0R4J039_MOUSE|466-473
WT	430.8	NA	VAMDTVSL	tr|Q5SUE3|Q5SUE3_MOUSE|35-42
WT	168.7	NA	KGWEFHSV	tr|A0A0A0MQC6|A0A0A0MQC6_MOUSE|226-233,tr|V9GWR8|V9GWR8_MOUSE|226-233
WT	18.2	NA	GSYIYLSM	tr|Q9DAX0|Q9DAX0_MOUSE|30-37
WT	7.6	NA	TTFLFCRI	sp|Q5ND56|FA57A_MOUSE|186-193,tr|E9Q1B2|E9Q1B2_MOUSE|154-161,tr|B7ZC15|B7ZC15_MOUSE|103-110
WT	79	NA	STLIFKSV	sp|P27786|CP17A_MOUSE|167-174
WT	299.3	NA	NVWVYINI	sp|D3Z6S9|ERIP6_MOUSE|548-555
WT	158.6	NA	ISLYNTSM	sp|Q9CQM2|ERD22_MOUSE|56-63
WT	468.8	NA	MNLTSPLL	sp|Q8BZ21|KAT6A_MOUSE|1820-1827,tr|G3X940|G3X940_MOUSE|1820-1827
WT	420.8	NA	KAVFLIGL	sp|Q99J94|SO1A6_MOUSE|353-360
WT	208.6	NA	LYHEFPGL	sp|Q8CIQ7|DOCK3_MOUSE|1623-1630,tr|F8VPQ1|F8VPQ1_MOUSE|1626-1633,tr|F6VMI1|F6VMI1_MOUSE|170-177
WT	312.9	NA	TIYLAIRV	sp|D3Z750|MRO2A_MOUSE|423-430,tr|F5H8M8|F5H8M8_MOUSE|420-427
WT	335.4	NA	AAWTVRAL	sp|P12023|A4_MOUSE|11-18
WT	472.5	NA	LWYSVIPM	sp|Q9JLM4|ZMYM3_MOUSE|1332-1339,tr|B1AXS6|B1AXS6_MOUSE|1240-1247,tr|B1AXS7|B1AXS7_MOUSE|1330-1337,tr|B1AXS8|B1AXS8_MOUSE|1318-1325
WT	456.6	NA	VFSKLSNV	sp|A2ARZ3|FSIP2_MOUSE|6121-6128
WT	257	NA	KSYFEPLV	sp|Q0VBD2|MCM10_MOUSE|764-771
WT	190.9	NA	ISIVELAL	sp|Q8BMG7|RBGPR_MOUSE|1116-1123,tr|A0A0A6YWM5|A0A0A6YWM5_MOUSE|1117-1124,tr|E9QKE4|E9QKE4_MOUSE|1137-1144
WT	440.5	NA	IGRAVMYL	sp|Q8C1D8|IWS1_MOUSE|604-611
WT	473.5	NA	SSWIGLVL	sp|Q9QZI8|SERC1_MOUSE|429-436
WT	175	NA	VGILCHAL	sp|P16331|PH4H_MOUSE|441-448,tr|F6YTR5|F6YTR5_MOUSE|105-112,tr|D3YZ73|D3YZ73_MOUSE|69-76
WT	329.1	NA	YSYSESRV	sp|Q99LX0|PARK7_MOUSE|139-146,tr|A2A813|A2A813_MOUSE|139-146
WT	130.6	NA	NTLKYYVL	tr|E9PWG2|E9PWG2_MOUSE|188-195,tr|E9PY51|E9PY51_MOUSE|188-195
WT	61.7	NA	VSLKYMSA	tr|Q8R298|Q8R298_MOUSE|168-175
WT	295.8	NA	MSLYQDPL	sp|B2RRE7|OTUD4_MOUSE|653-660,tr|G3UXQ0|G3UXQ0_MOUSE|145-152,tr|A0A0R4J260|A0A0R4J260_MOUSE|652-659
WT	405.5	NA	TFKKHSHL	sp|Q8R2V3|ZN445_MOUSE|941-948
WT	87.1	NA	LTLAFVGI	sp|A2AJ88|PLPL7_MOUSE|45-52,tr|B0R009|B0R009_MOUSE|43-50,tr|A0A0A6YWJ6|A0A0A6YWJ6_MOUSE|19-26
WT	143	NA	VYHSYLTI	sp|Q91YD4|TRPM2_MOUSE|969-976,tr|Q5KTC0|Q5KTC0_MOUSE|968-975
WT	318.9	NA	VSLFSKAV	sp|P97504|BMX_MOUSE|308-315,tr|B1AUL6|B1AUL6_MOUSE|312-319
WT	27.4	NA	VLSYFSFL	sp|Q32NZ6|TMC5_MOUSE|408-415
WT	450.6	NA	SVFSSRSF	sp|Q4QY64|ATAD5_MOUSE|1759-1766,tr|Z4YKQ9|Z4YKQ9_MOUSE|1756-1763
WT	195.3	NA	KNIFRLQL	sp|Q91WS4|BHMT2_MOUSE|129-136
WT	126.2	NA	RGYIAYEL	sp|E9Q4Z2|ACACB_MOUSE|1289-1296
WT	362.4	NA	SSHVNFIL	tr|E9Q4Z5|E9Q4Z5_MOUSE|80-87
WT	21.1	NA	VLLFFGAL	sp|O35595|PTC2_MOUSE|689-696
WT	11.4	NA	RLYRFSPI	sp|Q5XPI3|RN123_MOUSE|387-394,tr|Q05CH9|Q05CH9_MOUSE|387-394
WT	69	NA	INPLLYRL	sp|Q3UQ28|PXDN_MOUSE|1074-1081
WT	39.6	NA	TSPKFQAL	tr|Q8VCA0|Q8VCA0_MOUSE|225-232
WT	13.8	NA	SAYSRFVL	sp|Q8BYZ7|ELMO3_MOUSE|380-387
WT	80.3	NA	ASFLPLLL	sp|Q9R1C8|5HT6R_MOUSE|157-164
WT	205.2	NA	IMFRYAVD	sp|Q6WKZ8|UBR2_MOUSE|197-204
WT	194.4	NA	YSRRFRTI	sp|P11352|GPX1_MOUSE|177-184,tr|A0A0A6YY34|A0A0A6YY34_MOUSE|120-127,tr|A0A0A6YVV2|A0A0A6YVV2_MOUSE|121-128
WT	38	NA	LTFSYIAF	sp|O70622|RTN2_MOUSE|62-69
WT	355.5	NA	VYPVYLAV	sp|O08852|PKD1_MOUSE|3325-3332
WT	184.7	NA	ALYRKMRL	sp|Q8CIH5|PLCG2_MOUSE|724-731
WT	99.6	NA	IFQHYFGI	sp|Q91ZV4|MOGT1_MOUSE|267-274,tr|D3YW64|D3YW64_MOUSE|236-243
WT	186.1	NA	VNYNSSSF	sp|Q69ZQ1|K1161_MOUSE|394-401
WT	181.1	NA	RQFRASRL	sp|Q8CDW1|F228A_MOUSE|228-235
WT	45.2	NA	VVFAGMLL	sp|Q8BYF6|SC5A8_MOUSE|16-23
WT	187.2	NA	TVTAFSVL	sp|Q8K1S7|KREM2_MOUSE|371-378
WT	174.6	NA	TGWYWGSM	sp|O35717|SOCS2_MOUSE|46-53,tr|D3YZ26|D3YZ26_MOUSE|46-53,tr|D3Z355|D3Z355_MOUSE|46-53,tr|D3Z193|D3Z193_MOUSE|46-53,tr|D3Z441|D3Z441_MOUSE|46-53
WT	23	NA	LNFYLQSL	sp|Q9JLC4|SORC1_MOUSE|270-277
WT	83.6	NA	ISWCLLLL	sp|Q00898|A1AT5_MOUSE|5-12
WT	439	NA	RWLSYLLL	sp|Q3TH73|TTYH2_MOUSE|212-219
WT	277.1	NA	LAYLFTMG	sp|Q7TN60|TMC6_MOUSE|340-347,tr|B1ATB3|B1ATB3_MOUSE|340-347
WT	83.2	NA	TTKYYFIL	sp|Q5NCI0|URGCP_MOUSE|380-387
WT	19.2	NA	AFRFLSPL	sp|Q6P5E4|UGGG1_MOUSE|106-113,tr|G3UZU8|G3UZU8_MOUSE|106-113
WT	16.7	NA	IGILYMVL	sp|P47801|EMP1_MOUSE|150-157
WT	86.8	NA	SSYQDFLL	sp|Q8BSF5|KLH38_MOUSE|280-287
WT	194.1	NA	ICIVWFPL	sp|Q8CD54|PIEZ2_MOUSE|2483-2490,tr|F6YYK4|F6YYK4_MOUSE|308-315,tr|E9QNW4|E9QNW4_MOUSE|2485-2492
WT	130.8	NA	IHYFRKEL	sp|Q91XL3|UXS1_MOUSE|388-395
WT	304	NA	QGWRHRRL	sp|Q0P543|GIPR_MOUSE|401-408
WT	347.4	NA	RLQTFAVL	sp|Q80W94|MOGT2_MOUSE|14-21
WT	194.2	NA	LVYRIHSV	sp|Q4FJU9|TMM40_MOUSE|198-205,tr|E9QN39|E9QN39_MOUSE|239-246,tr|E9Q6I9|E9Q6I9_MOUSE|173-180
WT	70.7	NA	LSFPQHSL	sp|Q3UHF7|ZEP2_MOUSE|98-105,tr|A0A087WQF9|A0A087WQF9_MOUSE|98-105
WT	174.5	NA	IVTMLGNL	tr|Q8VGM7|Q8VGM7_MOUSE|34-41
WT	9.8	NA	TNFIFTLV	sp|Q3UHK1|MYCT_MOUSE|362-369
WT	6.3	NA	ITYSIASL	sp|Q8BNA6|FAT3_MOUSE|506-513,tr|E9QK16|E9QK16_MOUSE|502-509
WT	360.3	NA	SSIRGYIL	sp|Q9ERC8|DSCAM_MOUSE|1407-1414
WT	496.3	NA	KAFSFRSS	tr|Q80ZX2|Q80ZX2_MOUSE|231-238
WT	336.7	NA	CLYIHMFL	sp|Q64326|ACTHR_MOUSE|191-198
WT	436.8	NA	MSWPICVL	tr|Q8VGT4|Q8VGT4_MOUSE|136-143,tr|Q8VGL5|Q8VGL5_MOUSE|136-143
WT	166.6	NA	RTYNIFAI	sp|Q6WKZ8|UBR2_MOUSE|190-197
WT	184.7	NA	STLLRHRL	sp|Q3US17|ZNF48_MOUSE|343-350
WT	91.5	NA	VFGFLNGL	tr|A2ASU6|A2ASU6_MOUSE|150-157,tr|L7MTT3|L7MTT3_MOUSE|150-157
WT	16.8	NA	ITPVYHNM	sp|Q62120|JAK2_MOUSE|77-84,tr|G5E852|G5E852_MOUSE|77-84
WT	169.1	NA	VIYPKMMV	tr|Q8VGS2|Q8VGS2_MOUSE|83-90
WT	496	NA	TVLGLSSL	sp|Q8R0T6|AGRG3_MOUSE|470-477
WT	167.6	NA	VALCRAVL	sp|Q80UW3|RINL_MOUSE|358-365
WT	196.3	NA	AVILLPRL	sp|Q8CII9|CRLF2_MOUSE|6-13,tr|A0A0R4J0F5|A0A0R4J0F5_MOUSE|6-13
WT	380	NA	LKLYFRGL	sp|Q91Z69|SRGP1_MOUSE|557-564,sp|Q812A2|SRGP3_MOUSE|580-587,sp|Q91Z67|SRGP2_MOUSE|565-572,tr|D3YZW1|D3YZW1_MOUSE|580-587,tr|A0A087WNM1|A0A087WNM1_MOUSE|565-572,tr|A0A087WSQ1|A0A087WSQ1_MOUSE|424-431,tr|F7D9F7|F7D9F7_MOUSE|8-15,tr|F8VPQ4|F8VPQ4_MOUSE|580-587,tr|E9QN14|E9QN14_MOUSE|556-563,tr|A0A087WS59|A0A087WS59_MOUSE|180-187
WT	207	NA	LAITLYLL	sp|Q8R4P9|MRP7_MOUSE|409-416,tr|E9PZG1|E9PZG1_MOUSE|409-416
WT	321.5	NA	ASYKDVLL	sp|Q9D3G2|SLAF8_MOUSE|227-234,tr|Q3UQA2|Q3UQA2_MOUSE|227-234
WT	177.1	NA	IQQVLAPL	sp|Q99PM3|TF2AA_MOUSE|204-211,tr|J3QNT2|J3QNT2_MOUSE|197-204,tr|Q149E9|Q149E9_MOUSE|165-172
WT	383.8	NA	SLFDHHDL	sp|Q8BLA8|TRPA1_MOUSE|318-325
WT	169.4	NA	VAGYITYL	sp|Q80XM9|PQLC1_MOUSE|156-163,tr|D3Z2D5|D3Z2D5_MOUSE|138-145,tr|D3YYH5|D3YYH5_MOUSE|138-145
WT	372.1	NA	CRYYYPNV	sp|Q52KB6|C2CD3_MOUSE|1098-1105,tr|D3Z640|D3Z640_MOUSE|721-728,tr|E9Q526|E9Q526_MOUSE|1098-1105
WT	137.2	NA	VRYIHVEL	sp|Q4U2R1|HERC2_MOUSE|2621-2628
WT	465.6	NA	VQDRHFML	sp|Q9QXQ1|PDE7B_MOUSE|308-315,tr|E9PZN2|E9PZN2_MOUSE|321-328,tr|E9Q0W7|E9Q0W7_MOUSE|360-367,tr|E9PW23|E9PW23_MOUSE|360-367
WT	377.9	NA	YSYSTTAV	sp|P07309|TTHY_MOUSE|134-141
WT	347.1	NA	TAPWGAPL	tr|F6UCV1|F6UCV1_MOUSE|117-124
WT	446.9	NA	IGLHGLGL	sp|Q3V172|SE1L2_MOUSE|372-379
WT	265.7	NA	LIFCGIPL	sp|P28571|SC6A9_MOUSE|132-139,tr|E9Q3V0|E9Q3V0_MOUSE|77-84,tr|E9Q036|E9Q036_MOUSE|8-15,tr|E9QA02|E9QA02_MOUSE|78-85,tr|E9Q3Z2|E9Q3Z2_MOUSE|130-137
WT	32.2	NA	AAPWYFPI	tr|E9Q876|E9Q876_MOUSE|1279-1286
WT	204.7	NA	VVSVYGRV	tr|E9PZ36|E9PZ36_MOUSE|150-157
WT	46.2	NA	VGMVFSAF	sp|Q62240|KDM5D_MOUSE|503-510,sp|P41230|KDM5C_MOUSE|504-511
WT	186.7	NA	KWWKYTLL	sp|Q7TML3|S35F2_MOUSE|107-114
WT	29	NA	QGFDFSFL	sp|Q0VAV2|EXPH5_MOUSE|6-13
WT	75.1	NA	LVFSNVNL	sp|Q3U1J4|DDB1_MOUSE|666-673
WT	384.4	NA	TGVGYPQL	sp|Q99L27|GMPR2_MOUSE|192-199,sp|Q9DCZ1|GMPR1_MOUSE|192-199,tr|F6VY18|F6VY18_MOUSE|188-195
WT	354.9	NA	TCFLPYHL	sp|Q99MT7|GPR87_MOUSE|263-270,tr|Q059H2|Q059H2_MOUSE|264-271
WT	4.2	NA	VVWNFSSL	sp|Q811B1|XYLT1_MOUSE|31-38,tr|F8VPK6|F8VPK6_MOUSE|31-38
WT	199.2	NA	AQIFFVYI	tr|Q7TS04|Q7TS04_MOUSE|97-104
WT	310.2	NA	FGPYHIGL	tr|F6QAG4|F6QAG4_MOUSE|63-70,tr|F6WEP7|F6WEP7_MOUSE|2-9,tr|E9Q2V8|E9Q2V8_MOUSE|65-72
WT	467.1	NA	VVFAPKSI	sp|Q9WVJ0|KCNH3_MOUSE|291-298,tr|B2RU85|B2RU85_MOUSE|291-298
WT	262.8	NA	VKAAFFGL	sp|Q99JY4|TRABD_MOUSE|333-340
WT	187.3	NA	VILLRRQL	sp|Q8BZT2|SH3R2_MOUSE|151-158
WT	202.3	NA	THLLHAHL	sp|O35936|ALOX8_MOUSE|373-380,tr|B1ASX6|B1ASX6_MOUSE|373-380
WT	456.2	NA	SFLLFLTI	sp|Q64389|CD52_MOUSE|3-10
WT	324.3	NA	ISLKRVAV	tr|Q3UH85|Q3UH85_MOUSE|118-125
WT	476.6	NA	IGGVLFSL	sp|Q9WVD4|CLCN5_MOUSE|259-266,sp|P51791|CLCN3_MOUSE|330-337,sp|Q61418|CLCN4_MOUSE|259-266,tr|E9Q2I1|E9Q2I1_MOUSE|303-310,tr|Q3TF45|Q3TF45_MOUSE|330-337,tr|Q8K4W8|Q8K4W8_MOUSE|303-310,tr|B1ATV0|B1ATV0_MOUSE|329-336
WT	177.3	NA	IAWALRDL	sp|Q8R3S6|EXOC1_MOUSE|68-75,tr|Q5PPR2|Q5PPR2_MOUSE|68-75,tr|Q6P1Y9|Q6P1Y9_MOUSE|68-75
WT	186.1	NA	ASLTLTLL	sp|Q60625|ICAM5_MOUSE|151-158
WT	246.7	NA	IVAHLGYL	tr|Q3U3W2|Q3U3W2_MOUSE|132-139
WT	177	NA	SITFFLGV	sp|O88536|FPR2_MOUSE|34-41,sp|O08790|FPRS1_MOUSE|34-41
WT	12.8	NA	AVHLFALL	sp|Q8BH10|ORAI2_MOUSE|106-113,tr|A5CVE1|A5CVE1_MOUSE|120-127,tr|A0A0G2JFL5|A0A0G2JFL5_MOUSE|106-113
WT	310.5	NA	IFVMFLTI	tr|Q8VG96|Q8VG96_MOUSE|25-32
WT	182.9	NA	TVYSSKSL	sp|O35495|CDK14_MOUSE|372-379,tr|E9PVC7|E9PVC7_MOUSE|354-361
WT	46	NA	RLFSWALL	sp|Q14DK4|GPAT2_MOUSE|162-169
WT	161.5	NA	VHYWTSRF	sp|Q8R079|BFAR_MOUSE|354-361,tr|A0A0R4J040|A0A0R4J040_MOUSE|354-361
WT	425.9	NA	SIRYARTL	sp|Q9R0M8|S35A2_MOUSE|53-60,tr|A0A140LIP5|A0A140LIP5_MOUSE|53-60,tr|A2AER4|A2AER4_MOUSE|53-60,tr|A0A140LIG2|A0A140LIG2_MOUSE|53-60,tr|A2AER3|A2AER3_MOUSE|53-60,tr|F6WZ30|F6WZ30_MOUSE|52-59,tr|F6QH15|F6QH15_MOUSE|42-49
WT	360.1	NA	FQICFIPI	tr|Q148B1|Q148B1_MOUSE|483-490
WT	6.3	NA	ILYTYQLL	tr|A0A140T8V2|A0A140T8V2_MOUSE|88-95,tr|D3YU27|D3YU27_MOUSE|150-157,tr|J3QNQ0|J3QNQ0_MOUSE|148-155,tr|J3QPU0|J3QPU0_MOUSE|168-175,tr|A0A140T8V6|A0A140T8V6_MOUSE|142-149,tr|B1B0R2|B1B0R2_MOUSE|150-157,tr|E9PWJ8|E9PWJ8_MOUSE|150-157,tr|A0A0N4SW15|A0A0N4SW15_MOUSE|150-157
WT	112.2	NA	KNYPFLPT	tr|D3Z298|D3Z298_MOUSE|57-64
WT	17.8	NA	LAVSFAKL	sp|A2ALK8|PTN3_MOUSE|660-667
WT	22.7	NA	AVMMWASL	tr|L7N213|L7N213_MOUSE|196-203
WT	119.9	NA	STFYLFFV	sp|P97353|SEC1_MOUSE|24-31,tr|Q8CDC9|Q8CDC9_MOUSE|45-52
WT	188.1	NA	AANPFFKL	sp|Q6ZQ93|UBP34_MOUSE|2636-2643,tr|F6WJB7|F6WJB7_MOUSE|2656-2663
WT	45.2	NA	SALFSSPL	tr|D3Z420|D3Z420_MOUSE|368-375
WT	99	NA	ASAEFCNI	sp|O35613|DAXX_MOUSE|107-114,tr|G3UWJ9|G3UWJ9_MOUSE|107-114,tr|Q3UKR0|Q3UKR0_MOUSE|107-114,tr|G3UWI4|G3UWI4_MOUSE|107-114,tr|G3UX50|G3UX50_MOUSE|107-114
WT	70.3	NA	ATHEYRTL	sp|Q8VHK8|TM11D_MOUSE|69-76
WT	252.4	NA	ILKFAQYL	tr|Q3UFC0|Q3UFC0_MOUSE|12-19
WT	382.8	NA	IYPMETRL	tr|F6X0P2|F6X0P2_MOUSE|99-106
WT	423.3	NA	VSAFSCLV	tr|E9PZ36|E9PZ36_MOUSE|1778-1785
WT	58.6	NA	KAFAHHNI	tr|F6R9A8|F6R9A8_MOUSE|165-172,tr|Q99LG7|Q99LG7_MOUSE|166-173
WT	21.9	NA	VVKLFGPL	sp|Q61462|CY24A_MOUSE|76-83
WT	64.3	NA	VVVSYFLI	sp|Q78XF5|OSTC_MOUSE|37-44
WT	137.4	NA	TAFLLDAL	sp|Q68FD5|CLH1_MOUSE|563-570,tr|Q5SXR6|Q5SXR6_MOUSE|567-574
WT	45.6	NA	AIRTYLNL	sp|P97350|PKP1_MOUSE|528-535
WT	103.1	NA	RIFRLNNI	sp|Q8C5W0|CLMN_MOUSE|90-97
WT	162.3	NA	ITYESPQI	sp|O70318|E41L2_MOUSE|887-894
WT	450.7	NA	TALYMLAM	tr|Q7TRN3|Q7TRN3_MOUSE|32-39,tr|Q8VFM5|Q8VFM5_MOUSE|32-39
WT	11.6	NA	VNLQYRRL	sp|P16675|PPGB_MOUSE|360-367,tr|G3X8T3|G3X8T3_MOUSE|378-385
WT	173.8	NA	VNYKYEDF	sp|A2AF47|DOC11_MOUSE|115-122
WT	144.9	NA	LALIFCIL	sp|Q8VD57|SFT2B_MOUSE|123-130
WT	202	NA	ASRQFHAI	sp|Q6P5D3|DHX57_MOUSE|531-538
WT	400.6	NA	SVTFSGLL	sp|Q9Z2I4|ROBO3_MOUSE|829-836,tr|E9QPQ1|E9QPQ1_MOUSE|807-814,tr|D3Z4M6|D3Z4M6_MOUSE|829-836
WT	109.8	NA	VMFASTVM	sp|O35304|VACHT_MOUSE|161-168,tr|Q3TYJ1|Q3TYJ1_MOUSE|161-168
WT	265.9	NA	ANNFTTPL	sp|Q3U6B2|GP183_MOUSE|2-9
WT	85.7	NA	FSYVGFPV	sp|Q9JIP3|I17RB_MOUSE|121-128,tr|D6REG3|D6REG3_MOUSE|121-128,tr|D3Z4T0|D3Z4T0_MOUSE|121-128
WT	240.1	NA	FTYWLTFV	sp|Q80WQ6|RHDF2_MOUSE|376-383,sp|Q6PIX5|RHDF1_MOUSE|407-414
WT	39	NA	ILLQFPFL	sp|F7A4A7|OTOGL_MOUSE|314-321
WT	103.8	NA	TTISHFCL	sp|Q3UHQ6|DOP2_MOUSE|1586-1593
WT	89	NA	VSLHQLGL	sp|E2JF22|PIEZ1_MOUSE|505-512,tr|F7AC58|F7AC58_MOUSE|67-74,tr|F6QY99|F6QY99_MOUSE|66-73,tr|E9PUQ9|E9PUQ9_MOUSE|504-511
WT	202.8	NA	MSFNSHLF	sp|Q9EP93|V1R53_MOUSE|144-151,tr|A2RS76|A2RS76_MOUSE|144-151
WT	201.7	NA	VQVLFWCL	sp|Q99LY2|GDPD3_MOUSE|272-279
WT	225.5	NA	ISLLSSAV	sp|Q8BGQ6|EFC14_MOUSE|160-167,tr|A2A8T9|A2A8T9_MOUSE|160-167,tr|Q6PCQ6|Q6PCQ6_MOUSE|160-167
WT	26.5	NA	SSYCHPQM	sp|D3Z750|MRO2A_MOUSE|785-792,tr|F5H8M8|F5H8M8_MOUSE|782-789
WT	251.4	NA	LFYVYAVF	sp|P58749|TM6S1_MOUSE|63-70,tr|D6RD09|D6RD09_MOUSE|63-70
WT	339.1	NA	AYYSLQCL	sp|Q9CWL2|CASZ1_MOUSE|1221-1228,tr|B1AS46|B1AS46_MOUSE|1221-1228
WT	137.8	NA	LMRFIGPL	tr|A0A0J9YUX7|A0A0J9YUX7_MOUSE|193-200,tr|E9PW54|E9PW54_MOUSE|60-67,tr|D3Z3R5|D3Z3R5_MOUSE|60-67
WT	76.3	NA	IVFIFSGS	sp|Q8VEX6|OL187_MOUSE|197-204,tr|E9QNM5|E9QNM5_MOUSE|197-204
WT	198	NA	AGYPMGPF	sp|Q61425|HCDH_MOUSE|252-259
WT	418.7	NA	LSLLANLL	sp|Q80SS6|GPBAR_MOUSE|96-103
WT	157.2	NA	FAVLWLPL	sp|Q61041|NPY4R_MOUSE|274-281
WT	242.9	NA	KSQNWYRL	sp|Q9QXY7|XK_MOUSE|310-317
WT	379.1	NA	IVHCVVQL	sp|Q80V62|FACD2_MOUSE|1010-1017,tr|A0A0N4SV29|A0A0N4SV29_MOUSE|1010-1017
WT	22.3	NA	MFMFRASL	sp|Q61045|SIM1_MOUSE|231-238,sp|Q61079|SIM2_MOUSE|231-238
WT	47.3	NA	VASVFYGI	tr|Q8VF73|Q8VF73_MOUSE|272-279,tr|Q8VF74|Q8VF74_MOUSE|273-280,tr|Q8VF75|Q8VF75_MOUSE|273-280,tr|Q8VGC6|Q8VGC6_MOUSE|273-280
WT	148.6	NA	SGFGYSLA	sp|Q61738|ITA7_MOUSE|362-369,tr|G3X9Q1|G3X9Q1_MOUSE|318-325
WT	246.8	NA	MIFVPSYI	sp|Q8VCR2|DHB13_MOUSE|256-263,tr|A8Y5N4|A8Y5N4_MOUSE|220-227
WT	50.2	NA	ICYTAALL	sp|Q8K4P7|ST7L_MOUSE|370-377,sp|Q99M96|ST7_MOUSE|369-376,tr|D3YUM7|D3YUM7_MOUSE|346-353,tr|D3YUN2|D3YUN2_MOUSE|346-353
WT	342.8	NA	KSLLHLVL	sp|Q5FW85|ECM2_MOUSE|527-534
WT	488.2	NA	SNVFVQRM	sp|Q61789|LAMA3_MOUSE|2893-2900
WT	266.3	NA	LVFLGLAL	sp|Q7TN88|PK1L2_MOUSE|4-11,tr|B8JJX9|B8JJX9_MOUSE|38-45,tr|F7D8Z3|F7D8Z3_MOUSE|41-48,tr|B8JJY0|B8JJY0_MOUSE|51-58,tr|Q91W94|Q91W94_MOUSE|41-48,tr|E9Q4D4|E9Q4D4_MOUSE|4-11,tr|E9QPG2|E9QPG2_MOUSE|4-11
WT	150.6	NA	MHFLNMGL	sp|Q810S2|CB074_MOUSE|87-94
WT	320.6	NA	RNTYWISL	sp|Q60660|KLRA2_MOUSE|198-205
WT	199.9	NA	FLYPAAQL	sp|Q91W89|MA2C1_MOUSE|556-563,tr|F8WIE1|F8WIE1_MOUSE|554-561,tr|E9PYM7|E9PYM7_MOUSE|597-604,tr|F6TFL1|F6TFL1_MOUSE|61-68,tr|E9PZ88|E9PZ88_MOUSE|457-464
WT	61.7	NA	KAYRKMAL	sp|O89114|DNJB5_MOUSE|22-29,tr|A2AG30|A2AG30_MOUSE|56-63
WT	438.2	NA	TLFLFNNS	sp|Q8K0S5|R4RL1_MOUSE|225-232
WT	242.4	NA	TYMFDLLL	sp|Q8BY87|UBP47_MOUSE|690-697
WT	186.1	NA	FGYTSYSV	sp|P10605|CATB_MOUSE|225-232
WT	165	NA	FMYAPAIL	sp|P02772|FETA_MOUSE|168-175
WT	157.4	NA	LIKIFHSL	sp|Q8JZP2|SYN3_MOUSE|210-217,tr|D3Z620|D3Z620_MOUSE|210-217
WT	166.3	NA	QTPSFGFL	tr|B1AQX1|B1AQX1_MOUSE|97-104
WT	62.1	NA	FCMMFANM	tr|Q7TQT9|Q7TQT9_MOUSE|103-110,tr|A0A0U1RPS8|A0A0U1RPS8_MOUSE|118-125,tr|H3BKM1|H3BKM1_MOUSE|103-110
WT	402.9	NA	AYFRIKLM	tr|J3QMJ4|J3QMJ4_MOUSE|34-41
WT	144.4	NA	ISQLVPRL	sp|Q7TQB9|TR143_MOUSE|121-128
WT	443.8	NA	SSIQKAPI	sp|P51830|ADCY9_MOUSE|373-380,tr|E9Q706|E9Q706_MOUSE|136-143
WT	81.1	NA	IFTSFLLL	sp|P41317|MBL2_MOUSE|3-10
WT	152.6	NA	VGFWQRFI	sp|Q3UHC2|LRRK1_MOUSE|1025-1032
WT	196.7	NA	SVISLASM	sp|Q8C3J5|DOCK2_MOUSE|1643-1650
WT	58.3	NA	ISYALFAP	tr|G3UXJ0|G3UXJ0_MOUSE|168-175
WT	445.4	NA	FFSFLGLL	sp|P43117|PF2R_MOUSE|204-211
WT	35.2	NA	FSFVQSTL	sp|Q8CI59|STEA3_MOUSE|391-398,tr|E9QN92|E9QN92_MOUSE|429-436,tr|A0A0R4J1G9|A0A0R4J1G9_MOUSE|391-398
WT	388.1	NA	VILLMRQI	tr|Q9D3Y2|Q9D3Y2_MOUSE|227-234
WT	387.3	NA	TLYEEPPL	sp|Q62418|DBNL_MOUSE|348-355
WT	65.3	NA	LCFQFAPF	tr|E9QMT1|E9QMT1_MOUSE|125-132
WT	4.9	NA	SNFSFACL	sp|Q8R3F5|FABD_MOUSE|200-207
WT	452.8	NA	MMYISDCL	sp|Q8K3F7|TDH_MOUSE|265-272
WT	50	NA	VGYTILGM	sp|P79457|UTY_MOUSE|934-941,tr|E9Q504|E9Q504_MOUSE|833-840,tr|E9PWW8|E9PWW8_MOUSE|933-940,tr|Q3UQE8|Q3UQE8_MOUSE|871-878,tr|G3X9F2|G3X9F2_MOUSE|934-941
WT	233.6	NA	TLLRYAVV	sp|Q99PL7|SCD3_MOUSE|250-257
WT	385.4	NA	VYAFKRLF	sp|Q3URE9|LIGO2_MOUSE|218-225
WT	172.5	NA	MVSEFVFL	tr|Q7TQX0|Q7TQX0_MOUSE|8-15
WT	232	NA	TGPVHVPL	sp|Q8BHL6|FAP24_MOUSE|9-16
WT	34.1	NA	MSTFFSFI	sp|P10749|IL1B_MOUSE|89-96
WT	107.6	NA	ASNYFRAM	sp|Q6V595|KLHL6_MOUSE|91-98
WT	99.8	NA	VTLNFREF	sp|Q6P1E8|EFCB6_MOUSE|817-824
WT	43.9	NA	SSLTFNLV	sp|Q9WUF3|C8AP2_MOUSE|1280-1287
WT	18.1	NA	AYYLYIPL	sp|Q99PG0|AAAD_MOUSE|15-22
WT	223.7	NA	GSYAMTEL	sp|P98203|ARVC_MOUSE|748-755
WT	358.4	NA	YVVTFCGV	sp|Q9DBG7|SRPRA_MOUSE|417-424
WT	38.5	NA	VWFIFISL	sp|Q8BKU8|TM87B_MOUSE|367-374
WT	383.3	NA	LAFYTPAF	tr|F8VQ26|F8VQ26_MOUSE|250-257,tr|L7N1Y4|L7N1Y4_MOUSE|250-257
WT	88.8	NA	SYPFHRPV	sp|Q03358|MSX2_MOUSE|239-246
WT	166.6	NA	VYMSVLSL	sp|Q8VDT1|SC5A9_MOUSE|148-155,tr|I7HPX2|I7HPX2_MOUSE|63-70
WT	115.8	NA	IFLFLTFL	tr|Q8VFV2|Q8VFV2_MOUSE|28-35
WT	134.1	NA	QIYLHHIL	sp|Q69ZJ7|RIC1_MOUSE|824-831,tr|E9QPA1|E9QPA1_MOUSE|824-831,tr|F7CN51|F7CN51_MOUSE|36-43,tr|F6S7U1|F6S7U1_MOUSE|716-723
WT	135.6	NA	VAMNCHGL	sp|Q8CH72|TRI32_MOUSE|436-443
WT	180.5	NA	CMLAFADM	tr|Q8VGZ3|Q8VGZ3_MOUSE|66-73
WT	422.8	NA	ASSGYGSL	sp|O70361|PER3_MOUSE|415-422
WT	83.8	NA	VLLVFMEM	tr|D3Z2U8|D3Z2U8_MOUSE|81-88
WT	348.7	NA	IILNFRTT	sp|P59111|KCNH8_MOUSE|272-279,tr|F6TUN6|F6TUN6_MOUSE|272-279,tr|A2A5F7|A2A5F7_MOUSE|278-285
WT	413.3	NA	LLHRYRHI	sp|Q3TQF0|FBX31_MOUSE|124-131
WT	17.3	NA	VGHLYFFL	sp|Q99J56|DERL1_MOUSE|179-186
WT	72.2	NA	IFFMFIQI	sp|Q8K358|PIGU_MOUSE|312-319,tr|Q3TAA8|Q3TAA8_MOUSE|313-320
WT	428.6	NA	EVFNFLLV	sp|Q3TA38|T120B_MOUSE|158-165
WT	168.1	NA	KMLLLYHL	sp|P30549|NK2R_MOUSE|192-199
WT	357.7	NA	VMAAACPL	tr|H3BJ85|H3BJ85_MOUSE|3-10,tr|A0A0R4J0G2|A0A0R4J0G2_MOUSE|3-10,tr|H3BK52|H3BK52_MOUSE|3-10
WT	293	NA	HAYTLRML	sp|Q9D387|LAMP5_MOUSE|113-120
WT	172.6	NA	SFFRFPLT	tr|Q9D5X6|Q9D5X6_MOUSE|98-105
WT	426.2	NA	ISPNGMSL	sp|Q99N09|M4A6B_MOUSE|14-21,tr|E0CZC1|E0CZC1_MOUSE|14-21
WT	481	NA	CVTPFLTL	sp|Q8R3N2|MFS6L_MOUSE|29-36
WT	97.2	NA	RAYRKVAL	sp|Q9QYI8|DNJB7_MOUSE|21-28
WT	223.6	NA	KSHYMARI	sp|Q3TDD9|PPR21_MOUSE|668-675
WT	133.9	NA	LSMHSLNL	sp|Q9JM55|TOB2_MOUSE|236-243
WT	39.1	NA	VVYTRTYV	sp|Q9EQG3|SCEL_MOUSE|542-549
WT	422.6	NA	SVGIFPYV	sp|Q8K4Q0|RPTOR_MOUSE|469-476,tr|A2ACM0|A2ACM0_MOUSE|469-476
WT	287.7	NA	MWRFTYYL	sp|Q9D6K9|CERS5_MOUSE|145-152,tr|H3BJ49|H3BJ49_MOUSE|96-103,tr|H3BLB3|H3BLB3_MOUSE|12-19,tr|H3BJQ0|H3BJQ0_MOUSE|145-152
WT	458.2	NA	LSLYADRL	sp|O35600|ABCA4_MOUSE|2059-2066,tr|A0A0G2JGG8|A0A0G2JGG8_MOUSE|851-858
WT	61.7	NA	MAYHLSKM	sp|P50172|DHI1_MOUSE|50-57,tr|Q3TJI8|Q3TJI8_MOUSE|20-27,tr|F2Z3U6|F2Z3U6_MOUSE|50-57
WT	29.6	NA	VSYFSANT	sp|Q3USB7|PLCL1_MOUSE|705-712
WT	222.8	NA	VFNDFLML	sp|Q6PGL7|FAM21_MOUSE|81-88,tr|A0A0N4SV74|A0A0N4SV74_MOUSE|81-88
WT	260.9	NA	AAFMLFCI	sp|Q6PI62|GP173_MOUSE|110-117
WT	64.6	NA	LFLMFAAL	sp|Q64343|ABCG1_MOUSE|451-458,tr|Q91WA9|Q91WA9_MOUSE|432-439
WT	83.7	NA	LAYILFFL	sp|Q9DC26|S46A3_MOUSE|211-218
WT	422.3	NA	FVAEHSNL	sp|Q8R4H4|CBPA5_MOUSE|152-159,tr|E9PYY7|E9PYY7_MOUSE|152-159,tr|D3Z3T4|D3Z3T4_MOUSE|152-159
WT	137.1	NA	INYSIIVI	tr|B9EKH0|B9EKH0_MOUSE|193-200
WT	382.1	NA	LSDHLAPL	sp|Q8K1K4|CENPI_MOUSE|469-476
WT	128.6	NA	SSLAMTLL	tr|Q3UWK8|Q3UWK8_MOUSE|36-43
WT	105.6	NA	CSILFPLI	sp|P52019|ERG1_MOUSE|556-563,tr|Q3TSS7|Q3TSS7_MOUSE|524-531
WT	50.1	NA	AAHGYLNL	tr|F6XJP7|F6XJP7_MOUSE|82-89,tr|E9Q4D0|E9Q4D0_MOUSE|82-89
WT	393.1	NA	ISQLKMFL	tr|E9Q8T7|E9Q8T7_MOUSE|3839-3846
WT	4.3	NA	ISLFYGLL	tr|Q9QZ20|Q9QZ20_MOUSE|280-287
WT	358.8	NA	FSIMGVNL	sp|Q62205|SCN9A_MOUSE|1333-1340,sp|Q6QIY3|SCNAA_MOUSE|1296-1303,sp|Q9ER60|SCN4A_MOUSE|1168-1175,sp|Q9WTU3|SCN8A_MOUSE|1339-1346,sp|Q9JJV9|SCN5A_MOUSE|1350-1357,tr|B1AYL0|B1AYL0_MOUSE|1322-1329,tr|E9PW82|E9PW82_MOUSE|1322-1329,tr|K3W4N7|K3W4N7_MOUSE|1351-1358,tr|A0A0R4J1M7|A0A0R4J1M7_MOUSE|1351-1358,tr|A2APX7|A2APX7_MOUSE|1333-1340,tr|A2APX6|A2APX6_MOUSE|1350-1357,tr|K3W4P8|K3W4P8_MOUSE|1296-1303,…
WT	125.2	NA	SYTRVPPL	sp|P42859|HD_MOUSE|2384-2391,tr|G3X9H5|G3X9H5_MOUSE|2385-2392
WT	139.3	NA	ISWIQNTM	tr|E9Q409|E9Q409_MOUSE|289-296
WT	459.4	NA	RHTVYAAL	sp|Q7TMB8|CYFP1_MOUSE|477-484,tr|A0A0R4J119|A0A0R4J119_MOUSE|477-484,tr|A0A0U1RQ05|A0A0U1RQ05_MOUSE|447-454
WT	221.8	NA	VCFQMTVL	sp|Q6PIX5|RHDF1_MOUSE|674-681
WT	490.5	NA	SWWLLTRM	tr|G3UWL5|G3UWL5_MOUSE|7-14,tr|G3UXC7|G3UXC7_MOUSE|19-26
WT	57.5	NA	MYFFLSIL	tr|Q3KPC7|Q3KPC7_MOUSE|62-69,tr|Q8VFY3|Q8VFY3_MOUSE|62-69,tr|Q8VFI8|Q8VFI8_MOUSE|62-69
WT	342.8	NA	HSFRVYDL	sp|Q9JJN2|ZFHX4_MOUSE|224-231,tr|E9Q5A7|E9Q5A7_MOUSE|224-231,tr|H3BLK8|H3BLK8_MOUSE|224-231
WT	351	NA	GVYGFLTF	sp|Q5HZH7|S38A8_MOUSE|266-273,tr|F6S1U6|F6S1U6_MOUSE|195-202
WT	133.7	NA	ATFQFTFC	tr|Q924H8|Q924H8_MOUSE|162-169
WT	23.3	NA	VVFVTFLL	tr|A2AUA4|A2AUA4_MOUSE|30-37
WT	379.1	NA	AVFWHSSA	sp|Q3UQ84|SYTM_MOUSE|134-141,tr|Q3TP97|Q3TP97_MOUSE|134-141,tr|Q922A3|Q922A3_MOUSE|134-141,tr|A0A0G2JGW2|A0A0G2JGW2_MOUSE|133-140
WT	426.1	NA	RAFVALYI	tr|A2AMD2|A2AMD2_MOUSE|193-200,tr|A6PWV4|A6PWV4_MOUSE|73-80
WT	185.2	NA	LVLTFLSV	sp|Q9EQH2|ERAP1_MOUSE|7-14
WT	309.8	NA	NFHAFYQL	sp|Q5SUA5|MYO1G_MOUSE|206-213
WT	248	NA	SLLAMFRL	tr|B1AYL1|B1AYL1_MOUSE|343-350
WT	53.2	NA	CGFVIAHL	sp|Q64676|CGT_MOUSE|143-150
WT	11.6	NA	VIVFYGTL	tr|A2AK62|A2AK62_MOUSE|248-255,tr|Q7TR64|Q7TR64_MOUSE|248-255,tr|Q7TR72|Q7TR72_MOUSE|248-255,tr|Q8VGS7|Q8VGS7_MOUSE|247-254,tr|Q8VGS0|Q8VGS0_MOUSE|248-255
WT	166.5	NA	KIWKIARL	tr|Q3UW50|Q3UW50_MOUSE|75-82
WT	8.7	NA	SYVFFTKL	sp|Q3T9M1|MFS2B_MOUSE|407-414,tr|B8JK42|B8JK42_MOUSE|304-311,tr|B8JK43|B8JK43_MOUSE|407-414
WT	171.5	NA	SIQRHSPL	sp|Q2PZL6|FAT4_MOUSE|4651-4658
WT	45.4	NA	SIPNFSYM	sp|Q8VE62|PAIP1_MOUSE|131-138,tr|D3Z3J6|D3Z3J6_MOUSE|98-105,tr|G3UZS6|G3UZS6_MOUSE|220-227,tr|F6Y616|F6Y616_MOUSE|215-222,tr|G3UYE5|G3UYE5_MOUSE|131-138,tr|G3UZH8|G3UZH8_MOUSE|123-130
WT	21.8	NA	TGYNFQRV	sp|Q922V4|PLRG1_MOUSE|442-449,tr|D3Z4V1|D3Z4V1_MOUSE|433-440
WT	125.6	NA	ISIFHGII	tr|Q7TR25|Q7TR25_MOUSE|246-253,tr|Q8VFG1|Q8VFG1_MOUSE|250-257,tr|Q7TR27|Q7TR27_MOUSE|250-257
WT	259.5	NA	VVLPQSTL	sp|Q9D6X6|PRS23_MOUSE|38-45,tr|A0A140LHE7|A0A140LHE7_MOUSE|38-45,tr|A0A140LIH7|A0A140LIH7_MOUSE|38-45,tr|A0A140LJH8|A0A140LJH8_MOUSE|38-45,tr|A0A140LHF1|A0A140LHF1_MOUSE|38-45,tr|A0A140LIL0|A0A140LIL0_MOUSE|38-45
WT	15.1	NA	VSSTFIGL	sp|Q925N1|SFXN4_MOUSE|149-156
WT	22.6	NA	MSYIFIIV	tr|Q8VFN5|Q8VFN5_MOUSE|216-223
WT	482.9	NA	VYLPSAPI	tr|D3Z7I2|D3Z7I2_MOUSE|412-419,tr|B2RW07|B2RW07_MOUSE|412-419,tr|F7C0E4|F7C0E4_MOUSE|632-639,tr|F6X2K7|F6X2K7_MOUSE|527-534
WT	191.4	NA	LGLLWLSL	sp|Q9D3W5|LRC71_MOUSE|514-521,tr|G3V007|G3V007_MOUSE|109-116
WT	47.3	NA	SVVEFILL	tr|Q8VFZ6|Q8VFZ6_MOUSE|7-14
WT	311.6	NA	GGPFFFCL	sp|Q8C6P8|ZFP57_MOUSE|86-93,tr|G3UY05|G3UY05_MOUSE|83-90,tr|H3BL53|H3BL53_MOUSE|43-50,tr|G3UYC1|G3UYC1_MOUSE|83-90
WT	141	NA	TVLSYGFI	sp|P34986|OLF6_MOUSE|212-219,tr|A0A0R4J0M0|A0A0R4J0M0_MOUSE|212-219
WT	353.6	NA	AVVRIVNL	sp|O70507|HCN4_MOUSE|414-421,tr|B2RY58|B2RY58_MOUSE|414-421
WT	231.4	NA	RGAAFSPI	tr|E9Q3E2|E9Q3E2_MOUSE|1013-1020
WT	267.5	NA	LGFLEPGL	sp|Q9DAE8|CA074_MOUSE|70-77,tr|A0A0A6YY45|A0A0A6YY45_MOUSE|70-77,tr|A0A0A6YXC6|A0A0A6YXC6_MOUSE|70-77
WT	309.4	NA	LVQSFYAV	sp|Q80TK0|K1107_MOUSE|115-122
WT	80.9	NA	FSMCFGFV	sp|P56564|EAA1_MOUSE|249-256
WT	411.8	NA	VNVVALEL	sp|Q9JKK8|ATR_MOUSE|48-55,tr|E9QPK4|E9QPK4_MOUSE|48-55
WT	25.8	NA	IVYLLTLM	tr|E9PV79|E9PV79_MOUSE|37-44,tr|E9Q1P0|E9Q1P0_MOUSE|35-42,tr|Q7TRM0|Q7TRM0_MOUSE|37-44
WT	27.7	NA	ISPQYQPV	sp|Q5FWI3|TMEM2_MOUSE|1030-1037
WT	40.8	NA	SLRYFLAL	tr|A0A140LIE2|A0A140LIE2_MOUSE|354-361
WT	439.5	NA	VISFPGGL	tr|S4R2B8|S4R2B8_MOUSE|25-32
WT	423.2	NA	SCYLCFLL	sp|P48346|IL15_MOUSE|14-21
WT	158.1	NA	KFYFGPLL	sp|Q80W93|HYDIN_MOUSE|2863-2870
WT	21.6	NA	ATTYFTRL	tr|E9QAN8|E9QAN8_MOUSE|1311-1318
WT	395.5	NA	GFEYINPL	sp|Q62074|KPCI_MOUSE|580-587,sp|Q02956|KPCZ_MOUSE|577-584,tr|Q3V341|Q3V341_MOUSE|394-401
WT	481.3	NA	LQFKGSML	sp|Q9Z2V9|CCNI_MOUSE|195-202
WT	17.3	NA	ISFCNSGL	sp|F8VQN3|GPR31_MOUSE|193-200
WT	153.2	NA	MGYAAYLF	sp|Q9JHE3|ASAH2_MOUSE|295-302
WT	299.1	NA	KTYSLWPF	sp|Q8VE11|MTMR6_MOUSE|453-460
WT	22.1	NA	ISYEQCML	tr|Q7TRJ8|Q7TRJ8_MOUSE|90-97,tr|B2RTB9|B2RTB9_MOUSE|92-99
WT	263.5	NA	KLPEFNRL	sp|Q9CXJ1|SYEM_MOUSE|350-357
WT	254.1	NA	IVYMLFMF	sp|O55017|CAC1B_MOUSE|1280-1287,sp|P97445|CAC1A_MOUSE|1333-1340,tr|A2AIS0|A2AIS0_MOUSE|1275-1282,tr|A2AIR9|A2AIR9_MOUSE|1276-1283,tr|E9Q1R5|E9Q1R5_MOUSE|1286-1293,tr|A2AIR7|A2AIR7_MOUSE|1281-1288
WT	435.7	NA	YSAYHSCL	sp|Q8K337|I5P2_MOUSE|900-907
WT	182.9	NA	VIMVAHFL	sp|Q9CZR3|TM40L_MOUSE|162-169,tr|D3YXS8|D3YXS8_MOUSE|128-135
WT	411.8	NA	QSWWRGNM	tr|G3UWF2|G3UWF2_MOUSE|44-51
WT	112.7	NA	SNLALAEL	tr|Q6PGC9|Q6PGC9_MOUSE|818-825,tr|A2AVM0|A2AVM0_MOUSE|811-818
WT	415.3	NA	IMMVVAGF	sp|Q9ERN0|SCAM2_MOUSE|264-271
WT	290.2	NA	VFAGSANL	sp|P55249|LX12E_MOUSE|14-21
WT	229.4	NA	SSLLKLAL	tr|F8VPK0|F8VPK0_MOUSE|1440-1447
WT	114.4	NA	AFFSHPFL	sp|Q9QY01|ULK2_MOUSE|264-271
WT	250.6	NA	IAYSLICV	sp|O54689|CCR6_MOUSE|43-50
WT	111	NA	YTFVTPLL	tr|Q8VEZ5|Q8VEZ5_MOUSE|283-290,tr|Q8VGP8|Q8VGP8_MOUSE|283-290
WT	86.6	NA	MNFKSNTL	sp|Q8BI29|SARG_MOUSE|480-487
WT	317.1	NA	LFKLFRLL	sp|Q91VA3|CAN8_MOUSE|675-682,tr|A0A0R4J0K6|A0A0R4J0K6_MOUSE|675-682
WT	249.7	NA	GVIHFLEL	tr|E9Q368|E9Q368_MOUSE|355-362
WT	159.6	NA	IFCDFPPL	tr|E9Q5F1|E9Q5F1_MOUSE|177-184
WT	338.6	NA	RVMLHWLL	sp|Q9D1R1|T126B_MOUSE|181-188
WT	50.4	NA	MGLVFLRM	sp|Q5PT54|NTCP5_MOUSE|322-329
WT	122.3	NA	IIWLKENL	tr|J3QPI0|J3QPI0_MOUSE|394-401
WT	432	NA	SGWSEVNL	tr|D3Z3Y1|D3Z3Y1_MOUSE|545-552,tr|D3YTQ6|D3YTQ6_MOUSE|412-419,tr|D3Z4I0|D3Z4I0_MOUSE|537-544
WT	148.7	NA	AFTYPASL	sp|Q9WVB0|RBPMS_MOUSE|167-174,tr|S4R280|S4R280_MOUSE|30-37,tr|S4R1A1|S4R1A1_MOUSE|63-70,tr|S4R1T1|S4R1T1_MOUSE|18-25
WT	209.1	NA	SSLALRQL	sp|Q6PDE7|GGT6_MOUSE|73-80
WT	437.2	NA	IGVFNASV	sp|P35288|RAB23_MOUSE|191-198,tr|Q9D4I9|Q9D4I9_MOUSE|191-198
WT	363.3	NA	VNSLSASL	sp|P59759|MKL2_MOUSE|952-959,tr|Q5DTZ3|Q5DTZ3_MOUSE|952-959,tr|G3X8R8|G3X8R8_MOUSE|963-970
WT	426.3	NA	TMVSQMYL	sp|Q5DU14|MYO16_MOUSE|451-458,tr|F8WGF8|F8WGF8_MOUSE|451-458,tr|A0A140LJ46|A0A140LJ46_MOUSE|451-458
WT	138.8	NA	SVLFFSRA	sp|Q8C1F5|TTC16_MOUSE|37-44,tr|E9PZ84|E9PZ84_MOUSE|94-101,tr|Q3V0B6|Q3V0B6_MOUSE|37-44,tr|Q3TV33|Q3TV33_MOUSE|94-101
WT	387.4	NA	SSPFQAAV	sp|O35161|CELR1_MOUSE|582-589
WT	370.9	NA	TFGLLAPL	sp|Q91YV9|TM246_MOUSE|34-41,tr|A2AKL2|A2AKL2_MOUSE|34-41
WT	260.2	NA	SVFEENFL	sp|Q922R5|P4R3B_MOUSE|281-288
WT	70.6	NA	NGFSYLEL	sp|A2ASQ1|AGRIN_MOUSE|1523-1530,tr|M0QWP1|M0QWP1_MOUSE|1630-1637,tr|Z4YK85|Z4YK85_MOUSE|1523-1530
WT	293.8	NA	QTLFFLGV	sp|Q3TDQ1|STT3B_MOUSE|347-354,tr|A0A0R4J0D3|A0A0R4J0D3_MOUSE|347-354
WT	492.6	NA	STFNFCVP	tr|Q7TRA7|Q7TRA7_MOUSE|203-210
WT	333.8	NA	SGFVRRLF	sp|O88738|BIRC6_MOUSE|3828-3835,tr|S4R1L5|S4R1L5_MOUSE|3799-3806,tr|S4R2P8|S4R2P8_MOUSE|3815-3822
WT	142.5	NA	MVIIYAII	sp|Q02789|CAC1S_MOUSE|206-213,tr|E9Q7B5|E9Q7B5_MOUSE|206-213,tr|F8VQE0|F8VQE0_MOUSE|206-213,tr|E9QPX8|E9QPX8_MOUSE|206-213
WT	485	NA	SLNYLPNM	sp|Q05920|PYC_MOUSE|679-686,tr|E9QPD7|E9QPD7_MOUSE|680-687,tr|G5E8R3|G5E8R3_MOUSE|679-686
WT	286.9	NA	VVFLIDPF	sp|P27786|CP17A_MOUSE|481-488
WT	33.7	NA	ISILWIPI	sp|Q8VDT1|SC5A9_MOUSE|436-443
WT	203.7	NA	VSSHSFTL	sp|Q9JLZ8|SIGIR_MOUSE|102-109
WT	216	NA	VFMKSVKL	sp|Q91YR7|PRP6_MOUSE|677-684
WT	254.6	NA	AVQFVSSL	sp|Q6ZQK0|CNDD3_MOUSE|335-342,tr|Q80W41|Q80W41_MOUSE|335-342,tr|K4DI67|K4DI67_MOUSE|335-342
WT	268	NA	VSLTFTTS	sp|D3YYU8|OBSL1_MOUSE|724-731,tr|A0A0A0MQG1|A0A0A0MQG1_MOUSE|530-537,tr|A0A0B4J1L4|A0A0B4J1L4_MOUSE|724-731
WT	148.8	NA	SSARFRKV	sp|Q9CPW4|ARPC5_MOUSE|7-14,tr|Q3UA72|Q3UA72_MOUSE|7-14,tr|E9Q2K4|E9Q2K4_MOUSE|7-14
WT	286.4	NA	RIRFVPTL	sp|Q08AU7|MADL2_MOUSE|300-307
WT	28.1	NA	TAYLCGHL	sp|Q8BXJ9|TMM62_MOUSE|251-258,tr|D6RH67|D6RH67_MOUSE|251-258,tr|A2AQ56|A2AQ56_MOUSE|121-128
WT	104.6	NA	FVMKYNLM	sp|Q6PEB6|PHOCN_MOUSE|194-201,tr|E0CXA9|E0CXA9_MOUSE|173-180,tr|G8JL35|G8JL35_MOUSE|152-159,tr|E0CYJ0|E0CYJ0_MOUSE|162-169
WT	14.9	NA	TAFALFNL	sp|Q9R0Y8|GBRG1_MOUSE|449-456,tr|A0A0G2JDP9|A0A0G2JDP9_MOUSE|403-410
WT	99.6	NA	AGYFHKAV	sp|Q3U3W5|ANM9_MOUSE|121-128,tr|F8WIU7|F8WIU7_MOUSE|121-128
WT	16.7	NA	MSSLFGYL	sp|Q9Z1G4|VPP1_MOUSE|587-594,tr|K3W4T3|K3W4T3_MOUSE|580-587
WT	421.9	NA	LQVVFGTM	sp|O08791|COE3_MOUSE|292-299,sp|O08792|COE2_MOUSE|282-289,tr|Q6NXL3|Q6NXL3_MOUSE|283-290
WT	9.1	NA	VVPAFFAL	sp|Q9EQU3|TLR9_MOUSE|717-724
WT	136.5	NA	IFQNIANL	sp|P21447|MDR1A_MOUSE|832-839
WT	283.7	NA	SGYTFTSY	sp|P01749|HVM05_MOUSE|44-51,sp|P06328|HVM49_MOUSE|44-51,sp|P06327|HVM52_MOUSE|44-51,sp|P01746|HVM02_MOUSE|44-51,sp|P01747|HVM03_MOUSE|24-31,sp|P01753|HVM09_MOUSE|44-51,sp|P01755|HVM11_MOUSE|44-51,sp|P01754|HVM10_MOUSE|44-51,sp|P06329|HVM50_MOUSE|25-32,sp|P01748|HVM04_MOUSE|44-51,sp|P01750|HVM06_MOUSE|44-51,sp|P01751|HVM07_MOUSE|44-51,tr|A0A075B5T7|A0A075B5T7_MOUSE|44-51,tr|A0A0A6YXE0|A0A0A6YXE0_M…
WT	471.5	NA	HGLIFLPV	sp|O35604|NPC1_MOUSE|1238-1245
WT	71.5	NA	LARKFITL	sp|Q69Z23|DYH17_MOUSE|1980-1987,tr|E9Q7P0|E9Q7P0_MOUSE|1980-1987,tr|A2A520|A2A520_MOUSE|998-1005,tr|K3W4R0|K3W4R0_MOUSE|1980-1987,tr|B1AR51|B1AR51_MOUSE|2017-2024
WT	80	NA	RNFVHAVI	sp|Q99N42|TYPH_MOUSE|41-48
WT	33.3	NA	VLYCLSEL	sp|Q5DU56|NLRC3_MOUSE|566-573,tr|J3QQ49|J3QQ49_MOUSE|604-611
WT	107.8	NA	TNVDFPSL	sp|Q9Z179|SHCBP_MOUSE|131-138,tr|A0A140LHA7|A0A140LHA7_MOUSE|60-67
WT	123.5	NA	VAFPISKI	sp|Q8R183|TIMD2_MOUSE|268-275,tr|A8C1R4|A8C1R4_MOUSE|268-275
WT	98.3	NA	KNIIFCDL	sp|Q3UHC2|LRRK1_MOUSE|1380-1387,tr|F6YIW9|F6YIW9_MOUSE|295-302
WT	27.8	NA	YMLTYIPL	sp|Q91X85|FLVC2_MOUSE|153-160,tr|A0A0R4J0E9|A0A0R4J0E9_MOUSE|153-160
WT	96	NA	VVIKFRDV	tr|H3BJ18|H3BJ18_MOUSE|37-44
WT	174.5	NA	CYYLAHPL	sp|Q3TLS3|GDPP1_MOUSE|222-229
WT	158.1	NA	IFYFIQKI	sp|Q8VEM1|GOLI_MOUSE|214-221,tr|Q5SVR5|Q5SVR5_MOUSE|214-221
WT	25.3	NA	SSLLYPLI	sp|O35607|BMPR2_MOUSE|704-711
WT	143.6	NA	LVYHPVQL	sp|O88455|DHCR7_MOUSE|321-328,tr|A0A140LIT2|A0A140LIT2_MOUSE|324-331
WT	366.5	NA	AIHRLLAL	sp|P54276|MSH6_MOUSE|1347-1354
WT	225.7	NA	VLSVFSTI	sp|Q9Z351|KCNQ2_MOUSE|108-115,tr|A0A0G2JFQ2|A0A0G2JFQ2_MOUSE|108-115,tr|B7ZBV5|B7ZBV5_MOUSE|108-115,tr|B7ZBW2|B7ZBW2_MOUSE|108-115,tr|B7ZBW1|B7ZBW1_MOUSE|108-115,tr|B7ZBV6|B7ZBV6_MOUSE|108-115,tr|B7ZBV9|B7ZBV9_MOUSE|108-115,tr|B7ZBV8|B7ZBV8_MOUSE|108-115,tr|B7ZBV4|B7ZBV4_MOUSE|108-115,tr|B7ZBV7|B7ZBV7_MOUSE|108-115,tr|F6UC55|F6UC55_MOUSE|52-59
WT	283.3	NA	LTHNLPPL	sp|Q9D4A5|CP086_MOUSE|248-255
WT	146.8	NA	SLYLIAVL	tr|Q8VGZ7|Q8VGZ7_MOUSE|35-42
WT	441.2	NA	TYIRWQDL	sp|Q24JP3|F178B_MOUSE|440-447,tr|E9PXB2|E9PXB2_MOUSE|499-506
WT	237.6	NA	KHIKFWSL	sp|Q8BQM8|EMAL5_MOUSE|172-179
WT	456.3	NA	SSPPWFIV	sp|Q07235|GDN_MOUSE|365-372,tr|A0A087WQ70|A0A087WQ70_MOUSE|218-225
WT	44.6	NA	VYSFYGYV	sp|Q80TF3|PCD19_MOUSE|274-281,tr|E9Q5E1|E9Q5E1_MOUSE|274-281
WT	173.5	NA	STYLFEAS	tr|Q9QX15|Q9QX15_MOUSE|60-67,tr|Q9EQR4|Q9EQR4_MOUSE|60-67,tr|Q91Z28|Q91Z28_MOUSE|60-67
WT	276.9	NA	CYGYFRKL	sp|Q9D8G5|REG4_MOUSE|40-47
WT	366.1	NA	KNIRTVNL	sp|Q9CQ07|LRC18_MOUSE|121-128,tr|D3Z3F9|D3Z3F9_MOUSE|121-128
WT	264.3	NA	KSVTWYTI	tr|G5E8D5|G5E8D5_MOUSE|911-918,tr|G3UY08|G3UY08_MOUSE|64-71
WT	66.2	NA	MVERFSQL	sp|Q6A037|N4BP1_MOUSE|437-444
WT	266.5	NA	LSFVDFCL	tr|Q7TQY6|Q7TQY6_MOUSE|66-73
WT	490.6	NA	LNISAVRL	sp|Q8BGD9|IF4B_MOUSE|119-126
WT	376.4	NA	SSILKPLL	sp|Q8VD65|PI3R4_MOUSE|613-620
WT	102.4	NA	VAFEASLV	sp|Q9EPE9|AT131_MOUSE|271-278
WT	335.2	NA	VFYHLGAF	sp|Q3TXS7|PSMD1_MOUSE|67-74
WT	479.3	NA	SLRHWLLL	sp|Q61115|PTC1_MOUSE|1009-1016,tr|A0A0A6YWC4|A0A0A6YWC4_MOUSE|872-879
WT	469.6	NA	KIELYSKL	sp|A7XV14|SKI11_MOUSE|352-359,tr|A2A9I2|A2A9I2_MOUSE|161-168
WT	58.8	NA	ITLYTLYL	sp|Q9QZI9|SERC3_MOUSE|275-282
WT	401.9	NA	IGKIQANL	sp|Q6PGL7|FAM21_MOUSE|949-956,tr|A0A0N4SUJ0|A0A0N4SUJ0_MOUSE|863-870
WT	495.5	NA	SAHYFHRT	sp|Q99N99|S5A2_MOUSE|88-95
WT	223.4	NA	IQFHYGGC	sp|Q07456|AMBP_MOUSE|312-319
WT	252.7	NA	FYFRGYGL	sp|Q61603|GLRA4_MOUSE|370-377
WT	387.3	NA	VTLPVVML	sp|A4QPC6|BT2A2_MOUSE|254-261,tr|I7HIQ7|I7HIQ7_MOUSE|254-261
WT	6	NA	VTFDWAYL	sp|O88343|S4A4_MOUSE|662-669,tr|A7E1Z5|A7E1Z5_MOUSE|653-660,tr|E9Q8N8|E9Q8N8_MOUSE|662-669
WT	42.2	NA	VGFEHAGF	sp|Q9JJV0|CRBA4_MOUSE|55-62,tr|E9QAS6|E9QAS6_MOUSE|42-49
WT	476.6	NA	ISVATAAM	sp|Q8BMU0|ZNF76_MOUSE|547-554
WT	182.4	NA	TSLSLAHI	sp|Q9DBS4|ACOXL_MOUSE|503-510
WT	99.1	NA	VSYFIPST	sp|Q3UVY5|PCX4_MOUSE|304-311,tr|E9QN69|E9QN69_MOUSE|307-314
WT	468.1	NA	FSGVYKKL	sp|P62082|RS7_MOUSE|173-180,tr|F6SVV1|F6SVV1_MOUSE|171-178
WT	420.3	NA	QYFSFGKI	tr|F8VQB9|F8VQB9_MOUSE|305-312
WT	329.9	NA	LTDHFKPL	sp|Q9CR09|UFC1_MOUSE|117-124
WT	85.4	NA	IIWQCALL	sp|Q9WU39|SCNNG_MOUSE|67-74
WT	230.1	NA	HGVSYFRL	sp|Q64512|PTN13_MOUSE|712-719,tr|G5E8B1|G5E8B1_MOUSE|712-719
WT	299.1	NA	LFFYEGSL	sp|Q8VCZ6|SGSM3_MOUSE|300-307,tr|F8WIA4|F8WIA4_MOUSE|310-317,tr|F6VZH1|F6VZH1_MOUSE|6-13
WT	357.7	NA	VIKFLELL	sp|P43247|MSH2_MOUSE|273-280,tr|G3UXD8|G3UXD8_MOUSE|176-183
WT	288.7	NA	VFTYPNVL	sp|P47930|FOSL2_MOUSE|281-288
WT	259.2	NA	TSISRFGV	tr|B1AWD1|B1AWD1_MOUSE|90-97,tr|B1AWC8|B1AWC8_MOUSE|246-253,tr|Q3TTI9|Q3TTI9_MOUSE|71-78,tr|Q6IQY6|Q6IQY6_MOUSE|90-97,tr|Q8VBU5|Q8VBU5_MOUSE|308-315,tr|B1AWC9|B1AWC9_MOUSE|323-330,tr|B1AWD0|B1AWD0_MOUSE|151-158
WT	184.5	NA	LITEFVGL	sp|O70577|S22A2_MOUSE|224-231
WT	116.3	NA	TAFSSGFL	tr|A6H6S0|A6H6S0_MOUSE|907-914
WT	57.7	NA	ISDSFFFL	tr|E0CXH6|E0CXH6_MOUSE|175-182
WT	432	NA	QIFDFLGF	sp|Q3URJ8|NKAI3_MOUSE|25-32
WT	203.6	NA	VIPVLSEL	sp|Q80SS5|IFNAC_MOUSE|76-83
WT	25.6	NA	SFERYSYL	sp|Q69Z23|DYH17_MOUSE|983-990,tr|E9Q7P0|E9Q7P0_MOUSE|983-990,tr|K3W4R0|K3W4R0_MOUSE|983-990
WT	268.6	NA	FLTIFPPL	tr|A0A0N4SVC3|A0A0N4SVC3_MOUSE|151-158,tr|Q7TRI1|Q7TRI1_MOUSE|151-158,tr|Q8VFI3|Q8VFI3_MOUSE|151-158
WT	250.2	NA	NTFEEFPL	sp|O08675|PAR3_MOUSE|45-52
WT	5	NA	SSFPFDNL	sp|O55226|CHAD_MOUSE|284-291
WT	115.2	NA	SAIGYAIM	tr|A2AR26|A2AR26_MOUSE|118-125,tr|Q3UDF0|Q3UDF0_MOUSE|118-125
WT	426.1	NA	SCFSLILL	tr|L7N457|L7N457_MOUSE|210-217,tr|Q8VF72|Q8VF72_MOUSE|210-217
WT	157.5	NA	LMFFACTI	sp|Q9Z319|CORIN_MOUSE|574-581,tr|H3BKS9|H3BKS9_MOUSE|441-448,tr|H3BLR7|H3BLR7_MOUSE|433-440,tr|H3BLB2|H3BLB2_MOUSE|471-478
WT	76.3	NA	SMLSYRSV	sp|Q8BXR5|NALCN_MOUSE|1535-1542,tr|E9QLE4|E9QLE4_MOUSE|1535-1542
WT	153.7	NA	NFKFLGTL	sp|Q3UH06|RREB1_MOUSE|1408-1415,tr|F6UB40|F6UB40_MOUSE|81-88
WT	13	NA	VANFFGTL	tr|A0A140LJ69|A0A140LJ69_MOUSE|2023-2030
WT	13.7	NA	LTYASANL	sp|Q6P9S1|ATMIN_MOUSE|412-419
WT	321.3	NA	YNRKFAVI	sp|Q6A078|CE290_MOUSE|802-809,tr|E9Q9M0|E9Q9M0_MOUSE|809-816
WT	74.1	NA	LQFAFYVI	sp|Q9JMK0|B4GT5_MOUSE|193-200
WT	22.3	NA	SGYYYCIV	sp|P13504|IL1R1_MOUSE|94-101,tr|Q8C833|Q8C833_MOUSE|91-98
WT	331.6	NA	LNWSLLVL	sp|B1B212|H60B_MOUSE|8-15
WT	430.6	NA	VNTLACPL	sp|Q62179|SEM4B_MOUSE|591-598
WT	377.7	NA	YSQRLAEL	sp|Q3ULF4|SPG7_MOUSE|505-512,tr|D3YXB7|D3YXB7_MOUSE|505-512,tr|D3YZN4|D3YZN4_MOUSE|400-407,tr|D3Z1Z1|D3Z1Z1_MOUSE|505-512,tr|F6W695|F6W695_MOUSE|74-81
WT	450.6	NA	CTYCRRHF	tr|E9Q532|E9Q532_MOUSE|602-609,tr|A2A7F4|A2A7F4_MOUSE|712-719
WT	16.3	NA	TQFPYNPL	sp|Q60974|NCOR1_MOUSE|2394-2401,tr|E9Q2B2|E9Q2B2_MOUSE|2327-2334,tr|Q8CHB6|Q8CHB6_MOUSE|1665-1672,tr|Q5RIM6|Q5RIM6_MOUSE|2395-2402,tr|E9Q9Y2|E9Q9Y2_MOUSE|1340-1347,tr|F7C134|F7C134_MOUSE|1330-1337,tr|F6TRR6|F6TRR6_MOUSE|98-105
WT	68.1	NA	LLMSYVYL	tr|Q8VH17|Q8VH17_MOUSE|276-283
WT	435	NA	SLSTFYSI	tr|E9PZ36|E9PZ36_MOUSE|3448-3455
WT	129.7	NA	TTLYWSDL	sp|Q9JKX3|TFR2_MOUSE|128-135
WT	263.6	NA	NVLDYSLL	sp|Q6U7H8|PI5L1_MOUSE|278-285
WT	461.5	NA	LNMLRAQV	sp|Q6ZQ73|CAND2_MOUSE|426-433
WT	22.8	NA	MAEFYPNL	sp|Q9EPQ7|STAR5_MOUSE|197-204
WT	166.7	NA	YVFLEGFL	sp|Q6PHS6|SNX13_MOUSE|909-916,tr|E9QNG6|E9QNG6_MOUSE|910-917
WT	46.9	NA	TLFQLHNL	tr|H3BL13|H3BL13_MOUSE|189-196
WT	24.4	NA	LVWYYCTL	sp|Q3TA38|T120B_MOUSE|164-171,sp|Q8C1E7|T120A_MOUSE|168-175
WT	413.5	NA	LGLSMATM	sp|Q9JHH2|TSN32_MOUSE|24-31
WT	180.5	NA	IFLKLGGL	sp|Q50L41|PA24F_MOUSE|569-576
WT	109.7	NA	FSYSLGAI	sp|P30545|ADA2B_MOUSE|389-396,tr|F8VQ23|F8VQ23_MOUSE|392-399,tr|Q925K6|Q925K6_MOUSE|387-394
WT	256.1	NA	MSDLFARF	sp|Q8CFL8|ZSWM3_MOUSE|207-214
WT	407.9	NA	LAYPVLVL	tr|E9QAB5|E9QAB5_MOUSE|338-345
WT	255.6	NA	TSISHYVI	sp|Q9R1S3|PIGN_MOUSE|890-897,tr|G3X9F1|G3X9F1_MOUSE|890-897
WT	339.3	NA	VRVPFGNL	tr|E9PVL6|E9PVL6_MOUSE|61-68,tr|D3YVI7|D3YVI7_MOUSE|61-68
WT	493.7	NA	IHHFYCDV	tr|E9PYP4|E9PYP4_MOUSE|174-181
WT	293.5	NA	SFFCRFTI	sp|Q8VBW6|ULA1_MOUSE|118-125,tr|E0CZE0|E0CZE0_MOUSE|94-101
WT	428.5	NA	VYSYVIEV	sp|Q8CEZ1|SMCO1_MOUSE|76-83
WT	7.5	NA	AFFSFAPL	sp|A2ARI4|LGR4_MOUSE|764-771
WT	254.6	NA	YMRIFGVL	sp|A0JP43|EFCB5_MOUSE|1016-1023,tr|A0A0A0MQI1|A0A0A0MQI1_MOUSE|880-887
WT	356.3	NA	RGYYLSVF	sp|Q6PCX9|TRI37_MOUSE|321-328
WT	30.9	NA	SVFQAYQL	sp|Q8K0G8|ESRP2_MOUSE|682-689
WT	463.5	NA	SYFGSNRL	sp|Q05A36|MEX3C_MOUSE|450-457
WT	227	NA	TTAGFVLL	tr|Q7TRZ7|Q7TRZ7_MOUSE|6-13,tr|A0A0N4SW61|A0A0N4SW61_MOUSE|6-13
WT	392	NA	MSFLLTAT	sp|B1AUC7|RHG36_MOUSE|300-307,tr|Z4YJK0|Z4YJK0_MOUSE|300-307
WT	220.3	NA	YHMFIAGL	sp|O88908|SOAT2_MOUSE|123-130,tr|F6SMH4|F6SMH4_MOUSE|94-101
WT	200.3	NA	LSFYFQWT	tr|A0A0G2JG64|A0A0G2JG64_MOUSE|549-556
WT	309.2	NA	SAVFRENL	tr|B1AR69|B1AR69_MOUSE|652-659
WT	181.8	NA	LTFSMDTL	sp|Q6TDU8|CASC1_MOUSE|495-502,tr|A0A0R4J0S9|A0A0R4J0S9_MOUSE|495-502,tr|A0A0R4J1G3|A0A0R4J1G3_MOUSE|482-489,tr|A0A0N4SUQ9|A0A0N4SUQ9_MOUSE|495-502
WT	329.5	NA	VVIAMSGI	sp|Q99JX1|TAF11_MOUSE|150-157
WT	19.7	NA	ISFLILPM	sp|Q3U5C8|ARHGG_MOUSE|421-428,tr|D3YYY8|D3YYY8_MOUSE|570-577,tr|F6TAL7|F6TAL7_MOUSE|37-44
WT	116.1	NA	VTENFFIL	sp|Q9D2H5|TRI42_MOUSE|179-186
WT	56.5	NA	VLFYGTAL	tr|Q7TS18|Q7TS18_MOUSE|249-256
WT	144.3	NA	QMSLFRPL	sp|Q8BU33|ILVBL_MOUSE|165-172
WT	61.5	NA	ISFSSGCL	sp|A2AJX4|MALR1_MOUSE|221-228
WT	32.3	NA	KSPIFAGV	sp|Q8BLF2|CDKL3_MOUSE|230-237,tr|F2Z3Z6|F2Z3Z6_MOUSE|230-237,tr|B1AU43|B1AU43_MOUSE|230-237
WT	227.9	NA	AEYVFADL	sp|Q6TAC4|V2R26_MOUSE|68-75
WT	472.8	NA	SSLTTGLL	sp|O88839|ADA15_MOUSE|693-700
WT	51.6	NA	VVFALIFL	sp|O88853|GALR3_MOUSE|22-29
WT	497.3	NA	CWLAWSPL	tr|J3QMC5|J3QMC5_MOUSE|3023-3030,tr|A2ANY6|A2ANY6_MOUSE|3023-3030
WT	484.6	NA	TMAIYKSI	sp|Q80Y61|BI2L2_MOUSE|12-19,tr|E9QAX1|E9QAX1_MOUSE|12-19
WT	335.7	NA	ASGFFSVF	sp|Q91VA1|CTL4_MOUSE|649-656,tr|E9PWK0|E9PWK0_MOUSE|497-504
WT	167.6	NA	RSLFHCYI	sp|D3Z1Q2|MRAP2_MOUSE|115-122
WT	132.8	NA	LAWQYRFV	sp|A2A9C3|SZT2_MOUSE|90-97
WT	264.9	NA	IVSVAAHL	sp|O70622|RTN2_MOUSE|303-310
WT	252.4	NA	HSIVYTQI	sp|Q8K1G2|LBN_MOUSE|448-455
WT	189.3	NA	SSLALRAL	sp|Q8VCR3|TM242_MOUSE|75-82
WT	390.2	NA	SNLTSSLL	tr|E9PWH4|E9PWH4_MOUSE|953-960,tr|Q6XBG2|Q6XBG2_MOUSE|953-960
WT	67.2	NA	VVWFGENL	sp|Q8K2C6|SIR5_MOUSE|220-227
WT	5.1	NA	SSYTFPKM	sp|Q9WUR2|ECI2_MOUSE|280-287,tr|Q3TCD4|Q3TCD4_MOUSE|267-274
WT	424	NA	VGSVMGYL	sp|O09102|GCM2_MOUSE|483-490,tr|A0A0R4J021|A0A0R4J021_MOUSE|483-490
WT	437.8	NA	VGRGYLAV	sp|Q3UPL6|M4A15_MOUSE|171-178
WT	202.4	NA	FFLYFGDL	tr|Q8VGT2|Q8VGT2_MOUSE|103-110
WT	170.1	NA	ANLYFLDV	sp|Q3TPX4|EXOC5_MOUSE|478-485,tr|E9PZ92|E9PZ92_MOUSE|413-420
WT	324.2	NA	VLFYEEEL	sp|Q7TT50|MRCKB_MOUSE|694-701
WT	386.7	NA	SFKRVSSL	sp|P16374|ZFP60_MOUSE|520-527,tr|Q8K0D9|Q8K0D9_MOUSE|517-524
WT	16.5	NA	LMHTYASL	sp|Q8K1C7|MOT14_MOUSE|403-410
WT	239.2	NA	LAYLHFHS	sp|Q8BYC6|TAOK3_MOUSE|135-142,tr|A0A0R4J1T3|A0A0R4J1T3_MOUSE|135-142,tr|F6RXB5|F6RXB5_MOUSE|32-39
WT	101.1	NA	VIFLILYL	tr|Q7TQX5|Q7TQX5_MOUSE|29-36
WT	482.3	NA	SLQFLSVL	sp|Q8R4Y8|RTTN_MOUSE|1795-1802
WT	267.9	NA	TNFFIDNI	sp|P09065|HME1_MOUSE|107-114,sp|P09066|HME2_MOUSE|63-70
WT	4.3	NA	SSHLYAHL	tr|Q499D5|Q499D5_MOUSE|323-330
WT	116.3	NA	AIFGYLTF	sp|Q8K2P7|S38A1_MOUSE|324-331
WT	343.3	NA	VVIIGTGL	sp|Q9QZD5|RAE2_MOUSE|11-18,tr|A0A0R4J1A1|A0A0R4J1A1_MOUSE|11-18
WT	277.8	NA	LSVLRAEL	sp|Q8BLH7|HIRP3_MOUSE|501-508
WT	321.3	NA	SGTYFCAV	tr|A0A075B638|A0A075B638_MOUSE|102-109
WT	258.6	NA	LIFLVIRL	tr|E9Q5F1|E9Q5F1_MOUSE|44-51
WT	69.8	NA	TFEFHSIL	sp|O70481|UBR1_MOUSE|1273-1280
WT	255.2	NA	SVMRAKNL	sp|Q80TT2|BAIP3_MOUSE|163-170,tr|S4R1E7|S4R1E7_MOUSE|163-170,tr|S4R2U8|S4R2U8_MOUSE|135-142,tr|E9Q350|E9Q350_MOUSE|140-147,tr|S4R1K2|S4R1K2_MOUSE|163-170
WT	63.5	NA	SNVLHLPL	sp|Q6NS45|CCD66_MOUSE|797-804
WT	68.6	NA	IVIFSEPL	sp|Q0KL02|TRIO_MOUSE|2194-2201
WT	228.9	NA	LSLLCLRL	sp|B6A8R8|TARM1_MOUSE|6-13,tr|A0A0N4SVP3|A0A0N4SVP3_MOUSE|6-13
WT	155.9	NA	RYMWWYHL	sp|Q921V7|CTL3_MOUSE|380-387
WT	35.6	NA	LQFGYCLL	sp|P61804|DAD1_MOUSE|40-47
WT	94.3	NA	IGFLTLIL	sp|Q8K3F6|KCNQ3_MOUSE|268-275
WT	202.4	NA	IAVDFFSF	sp|Q91X88|PMGT1_MOUSE|398-405
WT	332.1	NA	SVPPFVTF	sp|Q8BU91|S26A9_MOUSE|655-662,tr|A0A0R4J0F7|A0A0R4J0F7_MOUSE|655-662
WT	77.7	NA	VGCIFGEL	sp|P24788|CD11B_MOUSE|613-620,tr|A2A9P6|A2A9P6_MOUSE|579-586
WT	363.9	NA	LTFHGQEL	sp|Q99LE6|ABCF2_MOUSE|98-105
WT	322.2	NA	KIPFQSRL	sp|Q3KNY0|IGFN1_MOUSE|2167-2174,tr|F6QKE4|F6QKE4_MOUSE|552-559
WT	37	NA	VMVFIAEL	sp|A2AHC3|CAMP1_MOUSE|318-325,tr|A0A0A0MQE5|A0A0A0MQE5_MOUSE|318-325,tr|A2AHC4|A2AHC4_MOUSE|338-345
WT	273.8	NA	VAMEIFSI	tr|L7N274|L7N274_MOUSE|805-812
WT	173.6	NA	LAAQHAPL	sp|Q3TPJ7|MIDN_MOUSE|157-164,tr|D3Z7H2|D3Z7H2_MOUSE|50-57
WT	433.4	NA	FVFTYLRS	tr|D3YUK6|D3YUK6_MOUSE|800-807
WT	464.5	NA	ITIWFSSG	sp|Q6DFV8|VWDE_MOUSE|535-542,tr|A0A0N4SVZ4|A0A0N4SVZ4_MOUSE|535-542
WT	343.6	NA	SVPTLSSL	sp|Q8BZT9|LACC1_MOUSE|203-210
WT	60.4	NA	IIASYAFI	tr|Q8VFP4|Q8VFP4_MOUSE|214-221
WT	267.4	NA	TLYWLGNF	sp|Q91V24|ABCA7_MOUSE|1591-1598,tr|E9Q6G4|E9Q6G4_MOUSE|1599-1606
WT	292.7	NA	AVFLVGVL	sp|Q2YFS3|PILRA_MOUSE|204-211
WT	65.8	NA	SGTVYIHL	sp|O35912|EMP3_MOUSE|152-159
WT	298	NA	VVFEGDSL	sp|Q7TT36|AGRA3_MOUSE|242-249
WT	387.9	NA	VFYTPAFF	tr|Q7TRR7|Q7TRR7_MOUSE|252-259
WT	481.7	NA	MSLFTAVV	sp|Q60674|NR1D2_MOUSE|500-507
WT	79.9	NA	LFAKYYHL	sp|P59644|PI5PA_MOUSE|508-515,tr|V9GXL7|V9GXL7_MOUSE|137-144,tr|A0A075B6D7|A0A075B6D7_MOUSE|508-515
WT	318.5	NA	SMYDFDPC	sp|Q9JJG5|SRTD2_MOUSE|249-256
WT	365.6	NA	LNLTLTKL	sp|Q99MT7|GPR87_MOUSE|3-10
WT	394.2	NA	GAIRFFAF	sp|P98192|GNPAT_MOUSE|116-123,tr|Q05DV2|Q05DV2_MOUSE|116-123
WT	337.3	NA	VPFDYASF	sp|Q80TY4|ST18_MOUSE|498-505
WT	306.1	NA	KTYYQEVL	sp|Q6VGS5|DAPLE_MOUSE|86-93
WT	313.9	NA	SLAHYSPV	sp|Q60819|I15RA_MOUSE|101-108,tr|E9QA82|E9QA82_MOUSE|13-20
WT	265.5	NA	SSETFSFM	sp|Q924W7|ST5_MOUSE|757-764
WT	222.3	NA	TAHLTFNL	sp|Q99L85|ELP5_MOUSE|233-240
WT	307.2	NA	MFQQYPRM	sp|Q3TLH4|PRC2C_MOUSE|250-257,tr|S4R2E2|S4R2E2_MOUSE|243-250,tr|S4R2J9|S4R2J9_MOUSE|248-255,tr|S4R294|S4R294_MOUSE|250-257,tr|A0A0A0MQ79|A0A0A0MQ79_MOUSE|248-255
WT	223.2	NA	ILLLVHNL	tr|E9Q8V7|E9Q8V7_MOUSE|32-39,tr|E9PYW5|E9PYW5_MOUSE|32-39,tr|Q9EPS4|Q9EPS4_MOUSE|32-39
WT	105.8	NA	IAAVMAFL	sp|Q09143|CTR1_MOUSE|388-395,tr|E9Q3N1|E9Q3N1_MOUSE|388-395
WT	486.9	NA	MARLAAAL	sp|Q80TR1|AGRL1_MOUSE|1-8,tr|D6RI60|D6RI60_MOUSE|1-8,tr|H7BX15|H7BX15_MOUSE|1-8,tr|E9Q9Q9|E9Q9Q9_MOUSE|1-8,tr|E9Q3V9|E9Q3V9_MOUSE|1-8
WT	290.7	NA	LHWRLLLL	sp|P97497|SHBG_MOUSE|9-16
WT	122.9	NA	VVFILRHF	sp|Q8BJI1|S6A17_MOUSE|634-641,tr|A0A0R4J252|A0A0R4J252_MOUSE|593-600,tr|A0A0R4J087|A0A0R4J087_MOUSE|631-638
WT	92.6	NA	LQYRLNAL	tr|A0A0A6YY12|A0A0A6YY12_MOUSE|72-79
WT	372.6	NA	SVIYLVTM	sp|Q7TS48|OL180_MOUSE|32-39,tr|F8VQ90|F8VQ90_MOUSE|32-39,tr|E9Q9T3|E9Q9T3_MOUSE|34-41,tr|A0A0U1RP27|A0A0U1RP27_MOUSE|32-39,tr|A0A0U1RNK4|A0A0U1RNK4_MOUSE|32-39
WT	334	NA	VTKFLALV	sp|Q7TT45|RRAGD_MOUSE|381-388,sp|Q99K70|RRAGC_MOUSE|330-337,tr|B1AWT2|B1AWT2_MOUSE|331-338,tr|B1AWT4|B1AWT4_MOUSE|211-218,tr|B1AWT3|B1AWT3_MOUSE|386-393
WT	367.3	NA	INIVPFGI	sp|Q7M721|TR120_MOUSE|182-189
WT	60.4	NA	FYFAFVTL	tr|A0A0N4SVC3|A0A0N4SVC3_MOUSE|198-205
WT	21.1	NA	LVMTFFEL	tr|Q3TG86|Q3TG86_MOUSE|324-331
WT	177.2	NA	LAYCLGQM	sp|Q99LN9|DOHH_MOUSE|58-65,tr|D3Z6Y9|D3Z6Y9_MOUSE|58-65,tr|D3Z7J7|D3Z7J7_MOUSE|58-65,tr|D3YZM0|D3YZM0_MOUSE|58-65
WT	174.1	NA	IMYNLIIV	sp|Q3UW12|CNGA4_MOUSE|45-52
WT	300.4	NA	RSFGSAVL	sp|Q02013|AQP1_MOUSE|195-202
WT	498.1	NA	LLKIFCQL	sp|Q5SYL3|K0100_MOUSE|126-133
WT	103.7	NA	GGFVYRGV	sp|Q62187|TTF1_MOUSE|725-732
WT	268.4	NA	VQFHLKNF	sp|Q920B9|SP16H_MOUSE|848-855,tr|G3X956|G3X956_MOUSE|848-855
WT	197.6	NA	MVPFLPFL	sp|P18581|CTR2_MOUSE|556-563,tr|E9QJY0|E9QJY0_MOUSE|573-580
WT	337	NA	AGRPWALL	sp|Q61647|HYAS1_MOUSE|430-437
WT	331.5	NA	IAFSLWIV	tr|E9Q7S8|E9Q7S8_MOUSE|5-12,tr|L7N2B1|L7N2B1_MOUSE|5-12,tr|K7N6Y7|K7N6Y7_MOUSE|5-12
WT	247.8	NA	YGWDHRHL	tr|A0A0J9YV32|A0A0J9YV32_MOUSE|356-363
WT	347.4	NA	MLFFPWEL	tr|E9PZS9|E9PZS9_MOUSE|429-436
WT	277	NA	VQSYYVFV	sp|Q3UMB9|WASH7_MOUSE|402-409
WT	321	NA	SYSCFSQI	tr|Q6YI28|Q6YI28_MOUSE|49-56
WT	19.6	NA	LIYFFSLV	sp|Q8BHH1|AQP11_MOUSE|81-88,tr|A0A0X1KG63|A0A0X1KG63_MOUSE|65-72
WT	243.4	NA	IIKTHLPL	sp|P52840|ST1A1_MOUSE|100-107,tr|D3Z3G5|D3Z3G5_MOUSE|100-107,tr|Q91W19|Q91W19_MOUSE|107-114,tr|D3Z2P8|D3Z2P8_MOUSE|100-107,tr|E9QNL5|E9QNL5_MOUSE|100-107
WT	467.8	NA	STQVTFRL	sp|Q8K0L2|ENTP8_MOUSE|224-231
WT	45.7	NA	LSGYYLSL	tr|Q8VCN3|Q8VCN3_MOUSE|120-127
WT	494.8	NA	SNFKVRFF	sp|Q03526|ITK_MOUSE|24-31,tr|Q5STT7|Q5STT7_MOUSE|24-31,tr|Q5STT8|Q5STT8_MOUSE|24-31
WT	67.2	NA	IYYLYNSF	sp|P31648|SC6A1_MOUSE|148-155
WT	114.7	NA	KMFFDAEL	sp|Q922U2|K2C5_MOUSE|298-305
WT	49.4	NA	VFPLFHAL	sp|Q3U4H6|HEXDC_MOUSE|29-36,tr|B1AXL0|B1AXL0_MOUSE|29-36,tr|F6UV46|F6UV46_MOUSE|26-33
WT	135.1	NA	NPYFYQNL	sp|Q8CFQ3|AQR_MOUSE|1198-1205,tr|A2AQA7|A2AQA7_MOUSE|1198-1205
WT	209.8	NA	YSVHFSFF	tr|J3QP74|J3QP74_MOUSE|194-201,tr|F6VLK5|F6VLK5_MOUSE|184-191,tr|J3QNK0|J3QNK0_MOUSE|194-201,tr|J3QPS1|J3QPS1_MOUSE|191-198,tr|F6QHK0|F6QHK0_MOUSE|190-197,tr|D3Z1I7|D3Z1I7_MOUSE|194-201,tr|F6QDW5|F6QDW5_MOUSE|180-187,tr|J3QPP7|J3QPP7_MOUSE|192-199,tr|J3QN11|J3QN11_MOUSE|191-198,tr|J3QM83|J3QM83_MOUSE|192-199,tr|J3QMT9|J3QMT9_MOUSE|192-199,tr|D3Z1I4|D3Z1I4_MOUSE|190-197,tr|J3KMR8|J3KMR8_MOUSE|191-…
WT	70.7	NA	GYRYYTCL	sp|Q9EPR5|SORC2_MOUSE|318-325,tr|D3YYF4|D3YYF4_MOUSE|146-153
WT	271.8	NA	VSWEQEFL	sp|Q05AH6|CK084_MOUSE|72-79
WT	243.8	NA	INNIIFSL	tr|E9Q7R9|E9Q7R9_MOUSE|1242-1249
WT	149.6	NA	ISFLGART	sp|Q3KNY0|IGFN1_MOUSE|1304-1311
WT	268.6	NA	EIYSFGRV	sp|P41241|CSK_MOUSE|378-385
WT	440.6	NA	TAINLEPL	sp|D3Z5T1|CCD78_MOUSE|299-306
WT	395.7	NA	VIYGMVVI	tr|Q8VGZ8|Q8VGZ8_MOUSE|198-205
WT	352.6	NA	LTLLVFRL	tr|A0A140T8U1|A0A140T8U1_MOUSE|23-30
WT	14.8	NA	SNAYFTRL	sp|P97927|LAMA4_MOUSE|1367-1374
WT	373.5	NA	ASIFDSRL	tr|Q8VG87|Q8VG87_MOUSE|48-55
WT	390.9	NA	VGLKFLQA	sp|P15532|NDKA_MOUSE|36-43,tr|Q5NC79|Q5NC79_MOUSE|36-43,tr|E9PZF0|E9PZF0_MOUSE|36-43,tr|Q5NC80|Q5NC80_MOUSE|36-43
WT	78.5	NA	VFYFASFI	sp|Q6ZQ89|MARH6_MOUSE|432-439
WT	251.9	NA	LSFPFCHS	tr|Q8VFG7|Q8VFG7_MOUSE|164-171
WT	137.7	NA	SAFAGLLL	sp|Q3V3R4|ITA1_MOUSE|1148-1155
WT	187.7	NA	ALFLEFNM	sp|Q8CFE5|BTBD7_MOUSE|377-384
WT	56.8	NA	VTWLHCCL	tr|A0A0U1RPW1|A0A0U1RPW1_MOUSE|90-97
WT	202.3	NA	LMNEFTNM	sp|P52479|UBP10_MOUSE|462-469,tr|G3X9U6|G3X9U6_MOUSE|26-33
WT	85.8	NA	KAPMFYEI	tr|B1AWG4|B1AWG4_MOUSE|1988-1995
WT	25	NA	AIFVFLHI	sp|Q6PFD9|NUP98_MOUSE|1564-1571
WT	480.1	NA	CSWTLATV	tr|F6YUB1|F6YUB1_MOUSE|28-35
WT	227.8	NA	TVYEVKLL	sp|Q8BQC3|IGDC3_MOUSE|600-607
WT	387.6	NA	NTHFSFPL	sp|Q6ZQ93|UBP34_MOUSE|2141-2148,tr|F6WJB7|F6WJB7_MOUSE|2161-2168,tr|Z4YLQ1|Z4YLQ1_MOUSE|382-389
WT	365.3	NA	SMVTEFLL	tr|Q7TRI4|Q7TRI4_MOUSE|5-12
WT	378.4	NA	VTQRTFKL	sp|P23780|BGAL_MOUSE|28-35
WT	499.5	NA	LMLILGEL	sp|P26361|CFTR_MOUSE|468-475,tr|E9PVD7|E9PVD7_MOUSE|438-445,tr|F6U9G7|F6U9G7_MOUSE|468-475
WT	411.9	NA	STVLHVNV	sp|Q61983|NPT1_MOUSE|288-295
WT	6.5	NA	VMYKLATL	sp|Q8VCV9|MF4B1_MOUSE|402-409,sp|Q9D8I5|MF4B2_MOUSE|355-362,sp|Q3UN21|MF4B3_MOUSE|346-353,tr|G5E8A5|G5E8A5_MOUSE|355-362,tr|J3QPW5|J3QPW5_MOUSE|355-362,tr|J3QNS5|J3QNS5_MOUSE|401-408
WT	134.6	NA	MVFRRCSV	sp|Q8K2X1|AT10D_MOUSE|448-455
WT	99.5	NA	VSVPCSPL	tr|A2A8L9|A2A8L9_MOUSE|1012-1019
WT	186	NA	YTVFTMRL	tr|Q8VGB1|Q8VGB1_MOUSE|162-169,tr|Q8VFY3|Q8VFY3_MOUSE|162-169
WT	144.6	NA	VIMVIFTL	sp|Q8CIV2|MBRL_MOUSE|300-307,tr|F6RN19|F6RN19_MOUSE|270-277
WT	496.7	NA	VVYTWYLE	sp|O08852|PKD1_MOUSE|1745-1752
WT	223.4	NA	RSWRAQLL	sp|Q3UHA3|SPTCS_MOUSE|329-336
WT	161	NA	IFSYVLIL	tr|F8VQ01|F8VQ01_MOUSE|213-220
WT	102.9	NA	ISLEMAAV	sp|Q9ESZ8|GTF2I_MOUSE|230-237,tr|Q3UHU8|Q3UHU8_MOUSE|230-237
WT	170.1	NA	TTLEMYFL	tr|A0A087WSU6|A0A087WSU6_MOUSE|49-56
WT	127	NA	IIWHSLAL	sp|Q9CZQ9|BBS5_MOUSE|57-64,tr|A2AUC6|A2AUC6_MOUSE|57-64,tr|D6RJ69|D6RJ69_MOUSE|57-64
WT	198.4	NA	KLWLFACL	sp|O35903|CCL25_MOUSE|2-9,tr|D3Z470|D3Z470_MOUSE|55-62,tr|D3YWJ1|D3YWJ1_MOUSE|86-93,tr|Q3V2F3|Q3V2F3_MOUSE|2-9
WT	400.1	NA	RALFCLSL	sp|Q99246|CAC1D_MOUSE|104-111
WT	21	NA	IVLYSFNL	tr|Q3SXF0|Q3SXF0_MOUSE|92-99
WT	28.4	NA	TSFNAVPL	sp|Q8K0C5|ZG16_MOUSE|126-133
WT	445.2	NA	VMDVFTDM	sp|A2ARK0|FA83C_MOUSE|207-214
WT	432.9	NA	VGCLHATI	sp|Q60887|OL148_MOUSE|149-156
WT	374.1	NA	MSIEILTL	sp|Q8BL99|DOP1_MOUSE|1483-1490,tr|H7BWZ9|H7BWZ9_MOUSE|1485-1492,tr|A0A087WQ48|A0A087WQ48_MOUSE|1483-1490,tr|A0A087WQM4|A0A087WQM4_MOUSE|21-28
WT	332.2	NA	SIITRAKL	sp|Q9WV89|STXB4_MOUSE|88-95
WT	44.1	NA	ISYLRCVV	tr|Q8VEY4|Q8VEY4_MOUSE|92-99
WT	20.6	NA	SSYHIIAL	sp|O35936|ALOX8_MOUSE|601-608,tr|B1ASX6|B1ASX6_MOUSE|572-579
WT	9.3	NA	STLGFFNL	sp|Q8BZK4|S35F4_MOUSE|331-338
WT	322.2	NA	KGLYPAPL	sp|Q8BMS1|ECHA_MOUSE|295-302
WT	56.9	NA	VAFAGWSL	sp|Q8CFA2|GCST_MOUSE|50-57
WT	361.2	NA	MIGAFFPI	tr|K7N747|K7N747_MOUSE|43-50,tr|E9PY92|E9PY92_MOUSE|43-50
WT	91	NA	SALAWLTL	sp|Q9CX30|YIF1B_MOUSE|189-196,tr|D3Z5F9|D3Z5F9_MOUSE|201-208,tr|A0A140LHN0|A0A140LHN0_MOUSE|193-200
WT	234.1	NA	RSWFLRQM	sp|Q6U7H8|PI5L1_MOUSE|260-267
WT	129	NA	VGIHHKHL	tr|E9Q1R6|E9Q1R6_MOUSE|44-51
WT	462.6	NA	IGQRLLTL	tr|E9PY92|E9PY92_MOUSE|288-295
WT	377.8	NA	AMRSLASL	sp|Q8BL86|MBLC2_MOUSE|261-268
WT	215.3	NA	SSVFWFLV	sp|Q8C7N7|APH1B_MOUSE|49-56,tr|F8WHK7|F8WHK7_MOUSE|49-56
WT	402	NA	FAMYCLLL	sp|Q3TPR7|T184C_MOUSE|223-230
WT	452.5	NA	VIMASPPI	sp|O09172|GSH0_MOUSE|125-132,tr|F6VNW5|F6VNW5_MOUSE|69-76,tr|H3BJA3|H3BJA3_MOUSE|94-101
WT	389.9	NA	YSAFLSQM	sp|Q80W93|HYDIN_MOUSE|1270-1277
WT	37.2	NA	VGFAVRYL	sp|Q9DB28|POP5_MOUSE|51-58
WT	176.7	NA	TSIAFAST	tr|F7C950|F7C950_MOUSE|1457-1464
WT	288.5	NA	ILPPFELL	sp|Q8BLY7|HPS6_MOUSE|561-568
WT	103.7	NA	VFQYYSFF	sp|Q80U16|FA65B_MOUSE|894-901,tr|A6PW28|A6PW28_MOUSE|869-876
WT	181.8	NA	NSPFYKAL	sp|Q8K411|PREP_MOUSE|358-365
WT	391.6	NA	VAPVAPLL	sp|Q80XS7|FA83E_MOUSE|325-332
WT	384.2	NA	THFSLVPV	sp|E9PVD3|PCD16_MOUSE|2678-2685
WT	62.4	NA	TIYLVTLL	tr|Q7TRN0|Q7TRN0_MOUSE|34-41,tr|Q920G5|Q920G5_MOUSE|41-48
WT	112.6	NA	VVVIQYRL	sp|Q8VCC2|EST1_MOUSE|165-172,sp|Q64176|EST1E_MOUSE|166-173,tr|H3BL34|H3BL34_MOUSE|165-172
WT	26.2	NA	LSFGLYGL	sp|Q80U63|MFN2_MOUSE|636-643
WT	397.8	NA	AVFYIPMF	tr|Q7TRS5|Q7TRS5_MOUSE|255-262,tr|E9PXW4|E9PXW4_MOUSE|257-264
WT	379.3	NA	IWYVIGKM	sp|P59111|KCNH8_MOUSE|373-380,tr|F6TUN6|F6TUN6_MOUSE|373-380
WT	207.1	NA	SSNVFLTV	sp|A8C756|THADA_MOUSE|1070-1077
WT	165.5	NA	IALLGSSL	tr|Q5SZ92|Q5SZ92_MOUSE|139-146,tr|G3UWD9|G3UWD9_MOUSE|109-116,tr|G5E894|G5E894_MOUSE|145-152
WT	264.7	NA	SSALRALL	sp|Q8BQM4|HEAT3_MOUSE|515-522,tr|E9PWH6|E9PWH6_MOUSE|398-405
WT	94.2	NA	VVPPFGLI	sp|Q9Z0E2|CHRD_MOUSE|797-804
WT	162.5	NA	CMWLSSPL	tr|D3Z4E5|D3Z4E5_MOUSE|18-25,tr|D3Z6A1|D3Z6A1_MOUSE|31-38
WT	157.6	NA	LYMHLNRL	sp|Q80XQ2|TBCD5_MOUSE|316-323
WT	46.2	NA	VISAFLTL	sp|Q8K0U3|TMM17_MOUSE|155-162
WT	299.2	NA	FVASYQEL	sp|Q69ZW3|EHBP1_MOUSE|20-27,tr|Q5SS55|Q5SS55_MOUSE|20-27
WT	47	NA	STFVAFIL	tr|A2ATA0|A2ATA0_MOUSE|14-21
WT	242.3	NA	ISPVPINL	sp|P39054|DYN2_MOUSE|115-122,sp|P39053|DYN1_MOUSE|115-122,tr|F8WIV5|F8WIV5_MOUSE|115-122,tr|Q3T9X3|Q3T9X3_MOUSE|115-122,tr|Q3TCR7|Q3TCR7_MOUSE|115-122,tr|G3X9G4|G3X9G4_MOUSE|115-122,tr|A0A0J9YUE9|A0A0J9YUE9_MOUSE|115-122,tr|A0A0J9YUN4|A0A0J9YUN4_MOUSE|115-122,tr|G3UZZ3|G3UZZ3_MOUSE|66-73
WT	473.4	NA	ILCLYIHM	sp|Q64326|ACTHR_MOUSE|189-196
WT	84.2	NA	VGYCSTRV	sp|Q3UB74|TBRG1_MOUSE|209-216
WT	79.3	NA	SQALFTLL	sp|Q3UZ18|ICE2_MOUSE|280-287
WT	386.6	NA	FWYDMAAL	sp|Q9QXZ0|MACF1_MOUSE|5965-5972,tr|E9QA63|E9QA63_MOUSE|5962-5969,tr|B1ARU4|B1ARU4_MOUSE|5964-5971,tr|E9PVY8|E9PVY8_MOUSE|5966-5973,tr|E9QNP1|E9QNP1_MOUSE|4089-4096,tr|F6Q750|F6Q750_MOUSE|3050-3057,tr|B1ARU1|B1ARU1_MOUSE|4510-4517,tr|F7ACR9|F7ACR9_MOUSE|3954-3961,tr|A0A0A0MQH5|A0A0A0MQH5_MOUSE|263-270,tr|A0A0A0MQA6|A0A0A0MQA6_MOUSE|3939-3946
WT	17.3	NA	INNIFLYL	tr|Q8VEY9|Q8VEY9_MOUSE|194-201
WT	114.1	NA	IFKKLPNL	sp|Q9WVB4|SLIT3_MOUSE|552-559
WT	174.1	NA	VTCRHQNL	sp|E9Q7T7|CHADL_MOUSE|45-52
WT	60.4	NA	SSFQSKPL	sp|Q99MY8|ASH1L_MOUSE|701-708
WT	391.2	NA	QILHYELL	sp|Q8CJG1|AGO1_MOUSE|676-683,tr|H3BJ70|H3BJ70_MOUSE|372-379
WT	456.6	NA	IVSLVPRL	sp|Q9CZW4|ACSL3_MOUSE|224-231,tr|E9PUC2|E9PUC2_MOUSE|72-79
WT	110.7	NA	QNIFWSSL	sp|Q920L5|ELOV6_MOUSE|232-239,tr|A0A0G2JFE8|A0A0G2JFE8_MOUSE|182-189
WT	123.3	NA	TSMHLGSL	sp|Q7TQC7|GPTC2_MOUSE|427-434,tr|E0CZ29|E0CZ29_MOUSE|96-103
WT	340.9	NA	LNREFETL	sp|Q61789|LAMA3_MOUSE|1895-1902
WT	493.7	NA	RAPKYVSF	sp|A2AJQ3|D19L4_MOUSE|38-45,tr|A2AJQ1|A2AJQ1_MOUSE|38-45,tr|D6RI72|D6RI72_MOUSE|38-45
WT	219.2	NA	VSTKLYIL	sp|Q710D3|UN93A_MOUSE|408-415,tr|B2RWK3|B2RWK3_MOUSE|408-415
WT	75.5	NA	ATYRRLCL	sp|Q9D0N8|TMM88_MOUSE|108-115
WT	59.3	NA	IGSTYQHL	tr|Q91WD8|Q91WD8_MOUSE|34-41
WT	47.7	NA	ALFAYSSF	sp|Q8K1C7|MOT14_MOUSE|325-332
WT	41.1	NA	IVKAFRYL	sp|O70460|CCL19_MOUSE|46-53,tr|F6Z9S8|F6Z9S8_MOUSE|46-53,tr|A0A0N4SUZ8|A0A0N4SUZ8_MOUSE|46-53
WT	447.8	NA	FHFPIYYL	sp|P61793|LPAR1_MOUSE|80-87
WT	291.8	NA	ILMLTSSL	sp|Q6PFG8|OLIG3_MOUSE|135-142
WT	121.7	NA	SYHYQVEL	sp|Q61194|P3C2A_MOUSE|557-564,tr|F8VPL2|F8VPL2_MOUSE|557-564
WT	111.8	NA	ISLYKAQI	sp|Q8K3R3|PLCD4_MOUSE|666-673
WT	344.8	NA	KLFDIRNL	sp|Q8K4P0|WDR33_MOUSE|313-320
WT	192.9	NA	MSPLRISL	sp|Q6PAL8|DEN5A_MOUSE|857-864,tr|A0A0R4J1B6|A0A0R4J1B6_MOUSE|833-840
WT	267.6	NA	SALFATIL	tr|E9PWT1|E9PWT1_MOUSE|682-689,tr|E9PZA7|E9PZA7_MOUSE|682-689,tr|E9QLK7|E9QLK7_MOUSE|682-689,tr|F7CGG2|F7CGG2_MOUSE|397-404
WT	93.4	NA	VAISFPQF	sp|Q9D7P9|SPB12_MOUSE|313-320
WT	380.2	NA	LLQYFQNI	sp|Q5SUS0|FBW10_MOUSE|69-76,tr|H3BK87|H3BK87_MOUSE|69-76,tr|B7ZC91|B7ZC91_MOUSE|69-76,tr|H3BLP9|H3BLP9_MOUSE|69-76
WT	302.7	NA	AQFFQAGV	sp|Q8BQ48|CE295_MOUSE|2327-2334,tr|F7BWD7|F7BWD7_MOUSE|1120-1127,tr|E9QPW4|E9QPW4_MOUSE|2295-2302
WT	141.2	NA	IIYRDTPV	sp|Q3UVX5|GRM5_MOUSE|601-608,tr|E9QMC2|E9QMC2_MOUSE|601-608
WT	59	NA	IVYTVVHI	tr|Q8VF34|Q8VF34_MOUSE|219-226
WT	378.8	NA	WQPLFYTL	tr|A0A087WS00|A0A087WS00_MOUSE|75-82
WT	75.6	NA	MVLSFWLL	sp|Q8BH24|TM9S4_MOUSE|613-620
WT	91	NA	AFVYLSKL	sp|Q8C031|LRC4C_MOUSE|143-150
WT	439.2	NA	SSFAPGSV	sp|E9PW74|GIMD1_MOUSE|36-43
WT	229.8	NA	SSASLASL	tr|F6RUV8|F6RUV8_MOUSE|47-54
WT	191.5	NA	SSYVANSF	sp|P32043|HXC5_MOUSE|2-9
WT	278.2	NA	VYLLQCNM	sp|A2A690|TANC2_MOUSE|686-693
WT	347.9	NA	QFQHFRGL	sp|Q9DAR1|CLF2A_MOUSE|157-164
WT	249.3	NA	LGTAYSKL	sp|Q61006|MUSK_MOUSE|196-203,tr|E9PVV8|E9PVV8_MOUSE|196-203,tr|J3QPS3|J3QPS3_MOUSE|196-203,tr|Q497X0|Q497X0_MOUSE|196-203,tr|K3W4P7|K3W4P7_MOUSE|196-203,tr|F6WVU1|F6WVU1_MOUSE|196-203
WT	264.7	NA	CVLAFTGV	sp|Q80XM9|PQLC1_MOUSE|149-156,tr|D3Z2D5|D3Z2D5_MOUSE|131-138,tr|D3YYH5|D3YYH5_MOUSE|131-138
WT	9.4	NA	TVLTFTSL	sp|Q64326|ACTHR_MOUSE|174-181
WT	391.2	NA	IVPGYDFL	sp|Q921L5|COG2_MOUSE|305-312
WT	156.6	NA	TSFLILPF	sp|Q8BWA8|ARHGJ_MOUSE|509-516
WT	162.8	NA	LMMSLLRL	sp|Q5XPI3|RN123_MOUSE|381-388,tr|Q05CH9|Q05CH9_MOUSE|381-388
WT	75.3	NA	TTFVARQL	sp|O70410|V2R1_MOUSE|797-804,tr|K7N784|K7N784_MOUSE|798-805,tr|H3BK29|H3BK29_MOUSE|798-805,tr|K7N788|K7N788_MOUSE|796-803,tr|L7N2E9|L7N2E9_MOUSE|793-800,tr|E9PYL5|E9PYL5_MOUSE|800-807,tr|E9Q277|E9Q277_MOUSE|709-716,tr|G3X8Y6|G3X8Y6_MOUSE|797-804,tr|E9PZ74|E9PZ74_MOUSE|709-716,tr|L7N478|L7N478_MOUSE|709-716,tr|L7N2D3|L7N2D3_MOUSE|709-716,tr|L7N1Z7|L7N1Z7_MOUSE|709-716
WT	330.5	NA	AGHVLAAL	sp|Q9D786|HAUS5_MOUSE|240-247
WT	71.1	NA	YVFKVVHL	sp|Q3UUQ7|PGAP1_MOUSE|759-766
WT	160.3	NA	SSNRYTGV	tr|A0A0G2JGH6|A0A0G2JGH6_MOUSE|1073-1080,tr|F6QGP8|F6QGP8_MOUSE|1037-1044
WT	145.6	NA	LNFLKGIL	sp|A7XV14|SKI11_MOUSE|149-156,tr|A6PWC1|A6PWC1_MOUSE|149-156,tr|A6PWC2|A6PWC2_MOUSE|123-130
WT	191.8	NA	RIFSLVGM	sp|Q8BN82|S17A5_MOUSE|365-372
WT	45.7	NA	SLLWFFGL	sp|Q8R4H9|ZNT5_MOUSE|104-111
WT	36.2	NA	TQISYLPL	tr|D3Z041|D3Z041_MOUSE|316-323
WT	370.3	NA	KFFFVRAI	sp|Q9Z218|DPP6_MOUSE|384-391,tr|Q80VM5|Q80VM5_MOUSE|383-390,tr|E9PWX1|E9PWX1_MOUSE|439-446,tr|Q5U4C2|Q5U4C2_MOUSE|381-388
WT	473.8	NA	VMLSAIPF	tr|Q3V0W9|Q3V0W9_MOUSE|111-118
WT	353.1	NA	LSTFCLLL	sp|Q99KV1|DJB11_MOUSE|6-13
WT	267.1	NA	LGFLYASG	sp|Q9Z2G6|SE1L1_MOUSE|257-264,tr|J3QJX3|J3QJX3_MOUSE|207-214
WT	55.7	NA	TAYWSGLL	sp|Q3UUQ7|PGAP1_MOUSE|693-700
WT	62.7	NA	VSASFGEM	sp|Q80UK8|INT2_MOUSE|465-472
WT	429.6	NA	ITTISSNL	sp|Q71LX4|TLN2_MOUSE|581-588,tr|E9PUM4|E9PUM4_MOUSE|580-587
WT	309.3	NA	RSGFWPAL	sp|P42925|PXMP2_MOUSE|144-151,tr|Q5D073|Q5D073_MOUSE|143-150
WT	476.4	NA	KFYTMAHV	sp|Q5DU09|ZN652_MOUSE|336-343,tr|F2Z3V9|F2Z3V9_MOUSE|156-163,tr|F2Z443|F2Z443_MOUSE|336-343
WT	179	NA	VMFPEFFF	tr|Q8R299|Q8R299_MOUSE|190-197,tr|E9Q2N4|E9Q2N4_MOUSE|189-196
WT	11.5	NA	KSYSYSEV	sp|Q8BHT7|RGP1_MOUSE|111-118,tr|Q3TDM6|Q3TDM6_MOUSE|111-118
WT	13.7	NA	VSFDYYYF	sp|Q9QY80|HACD1_MOUSE|237-244,tr|B9EHK9|B9EHK9_MOUSE|204-211
WT	293.7	NA	KNFCLISV	sp|Q8CEL2|CFA61_MOUSE|432-439,tr|A8Y5L4|A8Y5L4_MOUSE|410-417,tr|B7ZCD7|B7ZCD7_MOUSE|410-417
WT	53.3	NA	VAFAGNGL	sp|P97353|SEC1_MOUSE|267-274,tr|Q8CDC9|Q8CDC9_MOUSE|288-295
WT	239.4	NA	RAFNNTYL	sp|Q7TN58|TMC8_MOUSE|181-188,tr|B0QZP7|B0QZP7_MOUSE|181-188
WT	213.2	NA	CGKRFAEL	tr|A2ALW2|A2ALW2_MOUSE|488-495
WT	248.3	NA	DTFTYAKV	sp|Q8BGK6|YLAT2_MOUSE|193-200
WT	19.8	NA	VLYLKFRL	sp|Q08761|PROS_MOUSE|310-317
WT	33.1	NA	AAYEFRVI	sp|A2ASS6|TITIN_MOUSE|23214-23221,tr|E9Q8N1|E9Q8N1_MOUSE|21468-21475,tr|E9Q8K5|E9Q8K5_MOUSE|21468-21475
WT	408.3	NA	IAESYQNI	sp|P97464|EXT1_MOUSE|127-134
WT	493.9	NA	KYFPQAYM	sp|P57757|CTNS_MOUSE|280-287
WT	211	NA	LHMMYQAM	sp|Q8R5A0|SMYD2_MOUSE|340-347
WT	225.5	NA	IMTFRPSM	sp|Q8VCD7|KDM4C_MOUSE|16-23,tr|I7HLQ5|I7HLQ5_MOUSE|16-23
WT	110.1	NA	QSFSVGPL	sp|P59240|NPHP4_MOUSE|1065-1072
WT	361.5	NA	SCRVYLHL	tr|B7ZCQ3|B7ZCQ3_MOUSE|86-93
WT	189.9	NA	TPKFYVAL	sp|Q8K4P7|ST7L_MOUSE|80-87,sp|Q99M96|ST7_MOUSE|59-66,tr|D3YUM7|D3YUM7_MOUSE|59-66,tr|D6RGP5|D6RGP5_MOUSE|59-66,tr|S4R2B4|S4R2B4_MOUSE|80-87,tr|D3YUN2|D3YUN2_MOUSE|59-66
WT	178.8	NA	GHYPFAGI	tr|E9Q4Z5|E9Q4Z5_MOUSE|204-211
WT	167.3	NA	KANYFQKL	sp|Q8R2Q6|TECT3_MOUSE|156-163,tr|A0A0R4J1W4|A0A0R4J1W4_MOUSE|156-163
WT	377	NA	LFTHMASM	sp|Q810L4|TM39B_MOUSE|216-223
WT	222.7	NA	KLFRALGL	sp|O70496|CLCN7_MOUSE|757-764,tr|E9PYL4|E9PYL4_MOUSE|737-744
WT	34	NA	VFFGYHVL	tr|A2AQ99|A2AQ99_MOUSE|106-113,tr|A2AQ92|A2AQ92_MOUSE|100-107
WT	129.2	NA	SVLFKTRL	sp|Q9WVL6|EXTL3_MOUSE|900-907,tr|Q6P1H4|Q6P1H4_MOUSE|901-908
WT	222.7	NA	ILSCFCPM	sp|E9PUL5|PRRT2_MOUSE|279-286
WT	42.6	NA	TSLFIVNL	sp|P30731|GPR83_MOUSE|106-113
WT	202.2	NA	LGNFYIVL	sp|Q9JIT0|LMBR1_MOUSE|425-432,tr|J3QM78|J3QM78_MOUSE|397-404,tr|A0A0G2JFX9|A0A0G2JFX9_MOUSE|302-309
WT	411.2	NA	LFQYRAYI	sp|Q7TPN3|PIGV_MOUSE|254-261
WT	96.2	NA	ANLSFADI	tr|Q7TQQ4|Q7TQQ4_MOUSE|64-71,tr|B9EHG2|B9EHG2_MOUSE|66-73
WT	43.7	NA	VIARYKTL	sp|Q5SV66|CCD42_MOUSE|171-178
WT	34	NA	VVFCCFPM	tr|F6RCI4|F6RCI4_MOUSE|53-60
WT	411	NA	VIRRCLFL	sp|Q8BW49|TTC12_MOUSE|295-302
WT	141.2	NA	SSLALLSL	sp|Q8CIE0|SPA11_MOUSE|84-91,tr|E9QLL8|E9QLL8_MOUSE|87-94,tr|E9QK54|E9QK54_MOUSE|85-92,tr|H3BJV3|H3BJV3_MOUSE|85-92,tr|D3Z0P3|D3Z0P3_MOUSE|92-99
WT	303.4	NA	FIKSFQAL	sp|Q99246|CAC1D_MOUSE|1363-1370,sp|Q9JIS7|CAC1F_MOUSE|1325-1332,sp|Q02789|CAC1S_MOUSE|1260-1267,sp|Q01815|CAC1C_MOUSE|1353-1360,tr|A0A087WS67|A0A087WS67_MOUSE|1378-1385,tr|B1AVA6|B1AVA6_MOUSE|39-46,tr|B1AVA5|B1AVA5_MOUSE|46-53,tr|F8WJL1|F8WJL1_MOUSE|1353-1360,tr|A0A087WRM3|A0A087WRM3_MOUSE|1401-1408,tr|F7CNJ1|F7CNJ1_MOUSE|994-1001,tr|A0A087WPZ8|A0A087WPZ8_MOUSE|1353-1360,tr|B1AVA4|B1AVA4_MOUSE|13…
WT	428.6	NA	VNLKIQVL	sp|Q6KCD5|NIPBL_MOUSE|2221-2228
WT	70.3	NA	STGIFVYL	tr|Q8VF59|Q8VF59_MOUSE|254-261
WT	5.6	NA	CVYFFKNL	sp|Q9WUU9|GANP_MOUSE|1767-1774
WT	322.7	NA	VLVQLPRL	tr|F7D8T8|F7D8T8_MOUSE|62-69
WT	196.8	NA	SSFAYISW	sp|Q9JI78|NGLY1_MOUSE|543-550
WT	146.8	NA	YGFILSTI	tr|A2AM35|A2AM35_MOUSE|217-224
WT	130.2	NA	TSGTYFPM	sp|A2ARK0|FA83C_MOUSE|143-150
WT	136.6	NA	SSFSVVRV	sp|Q6P8H8|ALG8_MOUSE|231-238
WT	450.2	NA	GLYYFLKI	sp|Q7M709|TR129_MOUSE|104-111
WT	432	NA	SSLRFKWF	tr|A0A140LIK5|A0A140LIK5_MOUSE|64-71,tr|A0A140LIJ3|A0A140LIJ3_MOUSE|71-78,tr|Q6DR98|Q6DR98_MOUSE|64-71,tr|A0A140LJC1|A0A140LJC1_MOUSE|64-71,tr|A0A140LHZ9|A0A140LHZ9_MOUSE|71-78,tr|A0A140LHN1|A0A140LHN1_MOUSE|64-71,tr|A0A140LHG5|A0A140LHG5_MOUSE|64-71,tr|A0A140LJ88|A0A140LJ88_MOUSE|64-71,tr|A0A140LIP8|A0A140LIP8_MOUSE|64-71
WT	204	NA	IYQMLKNL	sp|E9Q735|UBE4A_MOUSE|381-388,tr|E9Q442|E9Q442_MOUSE|400-407,tr|G3X9Y5|G3X9Y5_MOUSE|400-407
WT	140.9	NA	SALCAARL	sp|P60487|PLPP_MOUSE|88-95
WT	10.2	NA	ISLSFLDL	sp|Q8VHD6|GTR10_MOUSE|458-465
WT	159.5	NA	FGYRKTPI	tr|E9PXI5|E9PXI5_MOUSE|523-530
WT	102	NA	VAFRFSPR	sp|Q91VD1|LEG12_MOUSE|70-77
WT	259	NA	SPYFMYNM	sp|Q50L43|PA24D_MOUSE|771-778
WT	73.1	NA	LSFYSLCL	sp|Q00175|PRGR_MOUSE|782-789,tr|E9QPW3|E9QPW3_MOUSE|620-627,tr|A6H6A5|A6H6A5_MOUSE|785-792
WT	46.8	NA	AYKYLAAL	sp|Q9JIG7|CCD22_MOUSE|556-563
WT	172.1	NA	VAMAAVLL	tr|A0A140LIP3|A0A140LIP3_MOUSE|198-205
WT	83.1	NA	FALFLGNL	sp|Q8R4P4|TMC2_MOUSE|492-499
WT	74.8	NA	IYRMIAAL	tr|Q3V0M1|Q3V0M1_MOUSE|853-860,tr|B7ZWJ3|B7ZWJ3_MOUSE|853-860
WT	291.5	NA	KSIFLPAI	sp|Q91XQ0|DYH8_MOUSE|302-309
WT	38.8	NA	LSFVAFPI	sp|Q8R183|TIMD2_MOUSE|265-272,tr|A8C1R4|A8C1R4_MOUSE|265-272
WT	24.9	NA	ILLNYAVL	tr|E9Q9G1|E9Q9G1_MOUSE|40-47,tr|Q80ZT6|Q80ZT6_MOUSE|40-47
WT	108.6	NA	KTLELAHL	sp|Q6ZWQ0|SYNE2_MOUSE|3282-3289,tr|E9QP46|E9QP46_MOUSE|3283-3290
WT	155.6	NA	ISHQHQKL	sp|Q8BFV2|PCID2_MOUSE|377-384
WT	469.2	NA	LIILNSNL	tr|Q7TRD6|Q7TRD6_MOUSE|51-58
WT	349.8	NA	RSYKRQQM	sp|A2AJK6|CHD7_MOUSE|1912-1919
WT	313.8	NA	AWFEQFVL	sp|Q9Z1N9|UN13B_MOUSE|1074-1081,tr|A0A140LHX5|A0A140LHX5_MOUSE|1435-1442,tr|A0A140LJ69|A0A140LJ69_MOUSE|3862-3869,tr|E9Q263|E9Q263_MOUSE|1062-1069,tr|F7CEK4|F7CEK4_MOUSE|22-29
WT	113.9	NA	YNFDWWYL	sp|P09470|ACE_MOUSE|493-500,tr|F6QCP8|F6QCP8_MOUSE|260-267
WT	163.8	NA	TIIHYEIL	tr|Q91XX1|Q91XX1_MOUSE|31-38,tr|A0A0A6YWM6|A0A0A6YWM6_MOUSE|31-38
WT	283.4	NA	VSLWNYVV	tr|D3YYJ7|D3YYJ7_MOUSE|176-183
WT	73.8	NA	VSLSTINL	sp|Q9WVB4|SLIT3_MOUSE|653-660
WT	5.2	NA	SNYIFTAV	tr|Q5SUF7|Q5SUF7_MOUSE|1314-1321,tr|E9PWL1|E9PWL1_MOUSE|1291-1298,tr|Q5SUG4|Q5SUG4_MOUSE|1314-1321,tr|Q5SUG2|Q5SUG2_MOUSE|1291-1298,tr|Q5SUF9|Q5SUF9_MOUSE|1291-1298,tr|Q5SUF8|Q5SUF8_MOUSE|1291-1298,tr|Q5SUF6|Q5SUF6_MOUSE|1314-1321,tr|Q5SUF5|Q5SUF5_MOUSE|1291-1298,tr|Q5SUG3|Q5SUG3_MOUSE|1314-1321,tr|Q5SUG1|Q5SUG1_MOUSE|1274-1281,tr|Q5SUG0|Q5SUG0_MOUSE|1314-1321
WT	279.9	NA	VTVSCTSL	sp|Q6ZQF0|TOPB1_MOUSE|109-116,tr|A0A087WPG9|A0A087WPG9_MOUSE|109-116
WT	40.1	NA	VSLFYNAF	tr|B1ARV2|B1ARV2_MOUSE|275-282
WT	80.4	NA	SIASFFAI	sp|Q9CWF6|BBS2_MOUSE|570-577
WT	54.8	NA	RIYRVAKL	sp|Q01337|ADA2C_MOUSE|232-239
WT	50.2	NA	HILYFRHL	sp|Q9QZB7|ARP10_MOUSE|73-80
WT	91.3	NA	AGFRALGL	tr|Q3TA68|Q3TA68_MOUSE|18-25,tr|Q3TAQ9|Q3TAQ9_MOUSE|18-25
WT	48.6	NA	LSYTAIKL	sp|A2ASS6|TITIN_MOUSE|29898-29905,tr|E9Q8N1|E9Q8N1_MOUSE|28152-28159,tr|E9Q8K5|E9Q8K5_MOUSE|28152-28159
WT	119.6	NA	SVFTSNKL	tr|F6XI52|F6XI52_MOUSE|885-892,tr|B1ART1|B1ART1_MOUSE|3969-3976,tr|V9GX23|V9GX23_MOUSE|2821-2828,tr|B1ART2|B1ART2_MOUSE|4000-4007
WT	44.6	NA	TFHVFSSL	sp|E9Q8I9|FRY_MOUSE|2710-2717,tr|A0A0J9YTT8|A0A0J9YTT8_MOUSE|343-350,tr|A0A0J9YVH0|A0A0J9YVH0_MOUSE|700-707
WT	354.1	NA	VLHAVYSL	sp|Q9CWR7|STEA1_MOUSE|173-180
WT	240.3	NA	KSFSRSSF	tr|Q8BKP2|Q8BKP2_MOUSE|165-172,tr|Q8BKP2|Q8BKP2_MOUSE|333-340,tr|Q8BKP2|Q8BKP2_MOUSE|473-480
WT	119	NA	IGFSYSLG	sp|Q91YT7|YTHD2_MOUSE|64-71,tr|F6Y6H7|F6Y6H7_MOUSE|40-47
WT	125.2	NA	IILVSSSL	sp|Q9EPR5|SORC2_MOUSE|217-224,tr|D3YYF4|D3YYF4_MOUSE|45-52
WT	154	NA	VNFFSGKF	sp|Q9R053|SCNBA_MOUSE|1176-1183
WT	59.7	NA	VVCMYRFL	sp|Q8VCH7|RDH10_MOUSE|308-315
WT	290.5	NA	FAFQYNPS	sp|Q04690|NF1_MOUSE|2238-2245,tr|Q5SYH9|Q5SYH9_MOUSE|222-229
WT	432.8	NA	FMDSYRYL	sp|Q68G58|APEX2_MOUSE|242-249,tr|A2AFM4|A2AFM4_MOUSE|249-256,tr|A2AFM3|A2AFM3_MOUSE|242-249,tr|F7CPY7|F7CPY7_MOUSE|251-258
WT	71.7	NA	YSYSFSSS	sp|E9Q557|DESP_MOUSE|2871-2878,tr|E9PZW0|E9PZW0_MOUSE|2272-2279
WT	107.2	NA	KAVYIAPL	sp|E9PZJ8|ASCC3_MOUSE|1375-1382
WT	353.9	NA	ISQMLTAM	sp|P97479|MYO7A_MOUSE|2198-2205,tr|Q5MJ56|Q5MJ56_MOUSE|2155-2162,tr|A0A0U1RPX7|A0A0U1RPX7_MOUSE|2147-2154,tr|A0A0R4J113|A0A0R4J113_MOUSE|2149-2156
WT	215.1	NA	IFIQHNGL	sp|Q99J45|NRBP_MOUSE|208-215,sp|Q91V36|NRBP2_MOUSE|179-186,tr|D3YUV1|D3YUV1_MOUSE|208-215,tr|A0A0J9YUQ4|A0A0J9YUQ4_MOUSE|123-130
WT	436.1	NA	LNLVVKPL	sp|P21126|UBL4A_MOUSE|67-74
WT	38.3	NA	TNMMLALL	tr|Q3V3A3|Q3V3A3_MOUSE|140-147
WT	250.6	NA	VKYLCYTM	sp|Q5BLK4|TUT7_MOUSE|1140-1147,tr|E9PUA2|E9PUA2_MOUSE|1140-1147
WT	210.4	NA	VITAFCYV	sp|Q76JU9|FFAR1_MOUSE|196-203
WT	315.4	NA	FIFRGAQI	tr|F6Q5V4|F6Q5V4_MOUSE|151-158
WT	10.4	NA	KGYIFLTL	sp|Q80VI1|TRI56_MOUSE|668-675,tr|A0A0R4J0Q6|A0A0R4J0Q6_MOUSE|668-675
WT	298.3	NA	FTLLLLPL	sp|Q8R242|DIAC_MOUSE|9-16,tr|A0A0G2JDI3|A0A0G2JDI3_MOUSE|9-16
WT	401	NA	YNRIFRDL	sp|Q3TZX8|NOL9_MOUSE|532-539
WT	84.4	NA	FAWFEYAL	sp|Q6P8H8|ALG8_MOUSE|71-78
WT	161.5	NA	RAFEHHRV	sp|Q3ULM0|CC106_MOUSE|200-207,tr|E9QPN6|E9QPN6_MOUSE|262-269
WT	216.4	NA	GSQYFIFL	sp|Q6DIC0|SMCA2_MOUSE|1121-1128,tr|H3BLH0|H3BLH0_MOUSE|1127-1134,tr|H3BJK2|H3BJK2_MOUSE|1069-1076,tr|E9QAB8|E9QAB8_MOUSE|1127-1134,tr|F2Z4A9|F2Z4A9_MOUSE|1127-1134
WT	457.3	NA	STYLHLHS	sp|Q8BYR8|S41A2_MOUSE|433-440
WT	299.3	NA	VSLENAVL	sp|Q9JI70|MKKS_MOUSE|266-273
WT	111.1	NA	SALDYEAL	tr|Q91XZ5|Q91XZ5_MOUSE|516-523
WT	339.2	NA	FVQCYHEL	sp|P59053|KCNG3_MOUSE|409-416
WT	344.6	NA	VRVIYTQL	sp|O88351|IKKB_MOUSE|605-612,tr|Q5D0E0|Q5D0E0_MOUSE|605-612,tr|A0A0R4J0T4|A0A0R4J0T4_MOUSE|605-612
WT	115.8	NA	LSDFIAPL	sp|A6H5Y3|METH_MOUSE|1070-1077
WT	228	NA	MSYICFLF	tr|E9Q382|E9Q382_MOUSE|277-284
WT	55.1	NA	SMYHNYIL	sp|Q5RJI2|CTL5_MOUSE|441-448
WT	56	NA	INFVRNTV	tr|E9Q8T7|E9Q8T7_MOUSE|2034-2041
WT	426.5	NA	SSWPTAWL	tr|E9Q720|E9Q720_MOUSE|99-106
WT	336.9	NA	RRSYFAFL	sp|Q9CRT8|XPOT_MOUSE|796-803
WT	71.5	NA	ASFYISLV	sp|Q80WG5|LRC8A_MOUSE|322-329
WT	93.5	NA	VLFYFNIF	sp|Q5RJI2|CTL5_MOUSE|85-92
WT	63.8	NA	IIYPLIVL	sp|Q9QYC1|PCX1_MOUSE|1364-1371
WT	155.5	NA	SSIFPLTL	sp|Q9D1U0|GRIFN_MOUSE|72-79
WT	75.5	NA	MVFLTLYL	tr|A0A140T8J6|A0A140T8J6_MOUSE|29-36
WT	29.8	NA	RNYRFFYA	sp|Q5Y5T2|ZDH18_MOUSE|224-231
WT	435.2	NA	LPSFFTKL	sp|Q60974|NCOR1_MOUSE|2205-2212,tr|E9Q2B2|E9Q2B2_MOUSE|2138-2145,tr|Q8CHB6|Q8CHB6_MOUSE|1476-1483,tr|Q5RIM6|Q5RIM6_MOUSE|2206-2213,tr|E9Q9Y2|E9Q9Y2_MOUSE|1151-1158,tr|F7C134|F7C134_MOUSE|1141-1148
WT	20.6	NA	VIIAYIML	sp|Q8BXR5|NALCN_MOUSE|1432-1439,tr|E9QLE4|E9QLE4_MOUSE|1432-1439
WT	143.8	NA	FFFRVAAL	sp|Q64008|RAB34_MOUSE|208-215,tr|B1AQD4|B1AQD4_MOUSE|214-221,tr|Q0PD20|Q0PD20_MOUSE|208-215,tr|B1AQD3|B1AQD3_MOUSE|200-207
WT	331	NA	TFFKMAWL	sp|Q9D2H2|KAD7_MOUSE|118-125,tr|F8WIC0|F8WIC0_MOUSE|227-234
WT	466.8	NA	SGYWMSWV	sp|P01811|HVM41_MOUSE|30-37
WT	415.1	NA	AAVLSFSL	sp|Q8JZN7|MIRO2_MOUSE|605-612,tr|H3BKJ1|H3BKJ1_MOUSE|395-402
WT	414.5	NA	CNKSFVFL	sp|Q1LZI2|S35F3_MOUSE|186-193
WT	28.1	NA	VVFGINNL	sp|Q9Z319|CORIN_MOUSE|923-930,tr|H3BKS9|H3BKS9_MOUSE|790-797,tr|H3BLR7|H3BLR7_MOUSE|782-789,tr|H3BLB2|H3BLB2_MOUSE|820-827
WT	8.7	NA	AALRFSQL	tr|E9PX29|E9PX29_MOUSE|598-605
WT	85.3	NA	VMSFYNGV	sp|Q8VHL1|SETD7_MOUSE|241-248
WT	328.9	NA	VGHYTVKL	sp|A2ASS6|TITIN_MOUSE|24004-24011,tr|E9Q8N1|E9Q8N1_MOUSE|22258-22265,tr|E9Q8K5|E9Q8K5_MOUSE|22258-22265
WT	167.6	NA	NSLIHATL	sp|Q9JIL5|TULP4_MOUSE|984-991,tr|Q3UH13|Q3UH13_MOUSE|791-798
WT	487.4	NA	ISDRLVTL	sp|Q8BVR6|RSPRY_MOUSE|268-275
WT	161.8	NA	TVFTELQL	sp|Q9ER42|BARX1_MOUSE|147-154
WT	207.8	NA	ASLFLTGI	tr|E9Q550|E9Q550_MOUSE|93-100
WT	432.9	NA	AWFFCLLL	sp|P39061|COIA1_MOUSE|422-429,tr|E9QPX1|E9QPX1_MOUSE|422-429,tr|D3Z5C2|D3Z5C2_MOUSE|422-429
WT	319	NA	SVIFGPLL	sp|P48356|LEPR_MOUSE|903-910
WT	354.5	NA	IYLHNPNI	sp|Q9D3R6|KATL2_MOUSE|245-252,tr|D6RGM7|D6RGM7_MOUSE|245-252,tr|D3Z4J2|D3Z4J2_MOUSE|201-208
WT	147.5	NA	VKIRFLPV	sp|P23738|DCHS_MOUSE|213-220
WT	284.3	NA	AGPHFVAV	sp|Q9R1R2|TRIM3_MOUSE|623-630,tr|Q3TDT0|Q3TDT0_MOUSE|623-630
WT	83.7	NA	TTYSLIIL	sp|Q00609|CD80_MOUSE|100-107
WT	111.8	NA	SSLNRYPV	sp|Q8BG34|UBX10_MOUSE|111-118
WT	230.3	NA	VSLGYQPA	sp|A1KXC4|FAIM3_MOUSE|383-390,tr|A0A0G2LB91|A0A0G2LB91_MOUSE|383-390
WT	167.3	NA	SMIILTKL	tr|Q8VGS2|Q8VGS2_MOUSE|51-58
WT	185.6	NA	VQFEYNFA	sp|Q80ZA4|PKHL1_MOUSE|776-783,tr|E9PUU8|E9PUU8_MOUSE|776-783,tr|F8WH29|F8WH29_MOUSE|776-783
WT	105.4	NA	LGFLSCSL	sp|Q91WF3|ADCY4_MOUSE|729-736
WT	119.9	NA	RTLFVGNL	sp|Q9CQT2|RBM7_MOUSE|10-17
WT	332.3	NA	TCYFSTPV	sp|Q9DC58|DRAM1_MOUSE|84-91,tr|D3Z5R7|D3Z5R7_MOUSE|26-33
WT	109.3	NA	SLCNFSPL	tr|A0A140LJ72|A0A140LJ72_MOUSE|8362-8369,tr|A0A140LI05|A0A140LI05_MOUSE|2450-2457,tr|Q9D1H1|Q9D1H1_MOUSE|142-149
WT	139.4	NA	IFVFYCVM	sp|B7ZCC9|AGRG4_MOUSE|2932-2939,tr|Q3UNS7|Q3UNS7_MOUSE|75-82
WT	244.2	NA	LVFTPLML	sp|P30554|MAS_MOUSE|196-203
WT	140	NA	QAYVFLLF	sp|Q9D8U2|TM41A_MOUSE|66-73
WT	235.6	NA	KMLTYDPM	sp|Q64437|ADH7_MOUSE|299-306
WT	177	NA	KSYWKRHM	sp|Q505G8|ZN827_MOUSE|383-390,tr|G5E8U2|G5E8U2_MOUSE|383-390
WT	115	NA	VILHVLPL	sp|Q3URE1|ACSF3_MOUSE|237-244
WT	115.6	NA	IVQGFNLL	sp|P20239|ZP2_MOUSE|197-204,tr|Q3UX44|Q3UX44_MOUSE|197-204,tr|A0A140LIR5|A0A140LIR5_MOUSE|197-204
WT	446.5	NA	WSRRYTEM	sp|Q69ZQ1|K1161_MOUSE|485-492
WT	449.6	NA	SAFVVFLV	sp|Q8BHH9|T179A_MOUSE|114-121
WT	476.6	NA	MVFAYCLC	sp|O35599|OPSG_MOUSE|268-275,tr|B1AYN7|B1AYN7_MOUSE|268-275
WT	452.2	NA	AGYTYCGS	sp|Q91VH6|MEMO1_MOUSE|50-57
WT	185.3	NA	SVLLYYTF	sp|Q9DCN7|RNFT1_MOUSE|176-183
WT	8.7	NA	VVILYGTL	tr|A2AVY0|A2AVY0_MOUSE|248-255
WT	274.2	NA	HSFSFHGA	sp|Q8CFX1|G6PE_MOUSE|55-62,tr|A2A7A8|A2A7A8_MOUSE|55-62,tr|A2A7A7|A2A7A7_MOUSE|63-70
WT	192.9	NA	VAVSLPTL	sp|P28660|NCKP1_MOUSE|1003-1010,tr|A2AS98|A2AS98_MOUSE|1009-1016
WT	60.6	NA	MIFLILNL	sp|Q7M712|TR110_MOUSE|143-150
WT	205	NA	YFLRLGNL	sp|Q8CIT0|CRF_MOUSE|63-70
WT	211.2	NA	SNIALLLL	tr|Q7TRP1|Q7TRP1_MOUSE|203-210,tr|Q7TRP2|Q7TRP2_MOUSE|203-210
WT	59.3	NA	YTFVQQHL	sp|Q923E4|SIR1_MOUSE|177-184,tr|Q3UNI1|Q3UNI1_MOUSE|138-145,tr|F6YAQ3|F6YAQ3_MOUSE|7-14
WT	145.1	NA	ASYIRIVM	tr|L7MTV4|L7MTV4_MOUSE|217-224
WT	52.1	NA	GNYFWVLL	tr|Q3UH59|Q3UH59_MOUSE|28-35
WT	317.2	NA	VIVLMGLL	sp|Q8BGD6|S38A9_MOUSE|152-159
WT	246.4	NA	VLLHRAFL	sp|Q6P4S8|INT1_MOUSE|2162-2169,tr|K3W4P2|K3W4P2_MOUSE|2187-2194,tr|A0A0G2JH17|A0A0G2JH17_MOUSE|2189-2196
WT	91.3	NA	QILTFSPM	sp|Q61532|MK06_MOUSE|295-302
WT	336.7	NA	IIILTGLL	sp|Q09143|CTR1_MOUSE|172-179,tr|A0A0J9YU45|A0A0J9YU45_MOUSE|21-28,tr|E9Q3N1|E9Q3N1_MOUSE|172-179
WT	211.7	NA	STWKVPLL	sp|Q80UG1|FADS6_MOUSE|141-148
WT	71.9	NA	FIFGYTKI	tr|A6PWA2|A6PWA2_MOUSE|62-69,tr|A6PWA1|A6PWA1_MOUSE|11-18,tr|A2AGW6|A2AGW6_MOUSE|31-38,tr|Q4VAD2|Q4VAD2_MOUSE|62-69
WT	42.1	NA	RAFLSSHL	sp|O35206|COFA1_MOUSE|1230-1237,tr|A2AJY2|A2AJY2_MOUSE|1208-1215,tr|A2AJY5|A2AJY5_MOUSE|396-403,tr|A2AJY7|A2AJY7_MOUSE|141-148
WT	326.4	NA	EAFHLALL	sp|Q922Q6|ABHEA_MOUSE|233-240,tr|E9PW22|E9PW22_MOUSE|252-259,tr|E9Q136|E9Q136_MOUSE|234-241
WT	421	NA	TNFSCLFV	sp|Q9Z0M9|I18BP_MOUSE|141-148
WT	282.3	NA	IFSAHPTL	sp|Q8BGX7|SPIDR_MOUSE|623-630
WT	396	NA	AVFLGAEI	sp|Q0GA42|CNNM1_MOUSE|334-341
WT	440.2	NA	SYTMVTPM	tr|Q7TQV1|Q7TQV1_MOUSE|286-293
WT	241.2	NA	LWFYNTSL	sp|Q9CTN4|RHBT3_MOUSE|403-410
WT	184	NA	LTRWLPNL	sp|Q8BQB4|FJX1_MOUSE|242-249
WT	42.7	NA	SIWEHSLL	sp|Q68FF6|GIT1_MOUSE|74-81,sp|Q9JLQ2|GIT2_MOUSE|74-81,tr|Q5F258|Q5F258_MOUSE|74-81,tr|F7BIK4|F7BIK4_MOUSE|74-81,tr|Q80XR8|Q80XR8_MOUSE|74-81,tr|J3QK07|J3QK07_MOUSE|74-81,tr|E9PVA6|E9PVA6_MOUSE|74-81,tr|D3Z1I2|D3Z1I2_MOUSE|74-81,tr|D3Z409|D3Z409_MOUSE|69-76
WT	440.7	NA	LVEYYYKM	sp|Q9D4C6|LR2BP_MOUSE|248-255,tr|G5E8E5|G5E8E5_MOUSE|269-276
WT	387.5	NA	SNYIAGVI	sp|Q8R0W0|EPIPL_MOUSE|1904-1911
WT	47.7	NA	VTSGYALL	sp|Q9WU60|ATRN_MOUSE|220-227
WT	27.9	NA	ALYDYMPM	sp|P35991|BTK_MOUSE|221-228,tr|A2BDW0|A2BDW0_MOUSE|221-228
WT	116.1	NA	VTLLIMKL	tr|A0A0G2JGD3|A0A0G2JGD3_MOUSE|310-317,tr|D3Z5R2|D3Z5R2_MOUSE|118-125,tr|Q8VCT8|Q8VCT8_MOUSE|118-125,tr|Q8CA26|Q8CA26_MOUSE|118-125,tr|G3X901|G3X901_MOUSE|238-245,tr|G3X9M9|G3X9M9_MOUSE|273-280
WT	9.4	NA	ISIPFFAI	tr|F8VPZ8|F8VPZ8_MOUSE|25-32
WT	169.2	NA	SSLTTAAL	sp|A1A5B6|TBC25_MOUSE|210-217,tr|S4R2S6|S4R2S6_MOUSE|28-35,tr|E9PWX7|E9PWX7_MOUSE|191-198
WT	400.6	NA	VPPRYPKL	sp|Q8BHB9|CLIC6_MOUSE|444-451
WT	147.4	NA	VGYVLSGA	sp|Q05117|PPA5_MOUSE|255-262
WT	374.5	NA	YLRSYRRL	tr|O70616|O70616_MOUSE|76-83,tr|O70619|O70619_MOUSE|76-83,tr|J3QK00|J3QK00_MOUSE|76-83
WT	58.4	NA	FAFLVSSL	sp|B2RY04|DOCK5_MOUSE|1193-1200
WT	440.8	NA	YAMAFSGA	tr|Q7TRC9|Q7TRC9_MOUSE|149-156
WT	72	NA	ISLLKQNL	tr|F6RSY8|F6RSY8_MOUSE|296-303,tr|E9PW83|E9PW83_MOUSE|700-707,tr|F6TU77|F6TU77_MOUSE|644-651
WT	490.8	NA	LFWYIFSL	sp|Q61056|TRPC1_MOUSE|594-601,tr|B2RPS7|B2RPS7_MOUSE|610-617,tr|B7ZMP6|B7ZMP6_MOUSE|576-583
WT	210.4	NA	VMFSFGCS	sp|Q9CXB2|SOAT_MOUSE|45-52
WT	100.3	NA	IYTAWLPL	tr|A2AI76|A2AI76_MOUSE|87-94
WT	65.4	NA	TILRFMEV	tr|D3YYQ8|D3YYQ8_MOUSE|705-712,tr|F7ABZ6|F7ABZ6_MOUSE|648-655
WT	55.5	NA	VNNAFRGL	sp|Q80YS9|STKL1_MOUSE|530-537
WT	240.1	NA	LSAFRPSL	sp|P27792|LYL1_MOUSE|79-86
WT	96.1	NA	YIPHYTSL	sp|Q9D4K5|F166A_MOUSE|85-92
WT	5.1	NA	VSLYFLEL	sp|Q7TME0|PLPR4_MOUSE|84-91,sp|Q7TPB0|PLPR3_MOUSE|34-41,tr|E9Q8U7|E9Q8U7_MOUSE|34-41,tr|E9QAX3|E9QAX3_MOUSE|34-41,tr|E9PVZ4|E9PVZ4_MOUSE|34-41,tr|A0A0R3P9D0|A0A0R3P9D0_MOUSE|34-41,tr|A0A0G2JGY9|A0A0G2JGY9_MOUSE|84-91,tr|E9PZA9|E9PZA9_MOUSE|34-41,tr|E9Q4F1|E9Q4F1_MOUSE|34-41
WT	13.2	NA	MAFFSRNL	tr|E9PZK8|E9PZK8_MOUSE|721-728
WT	205.1	NA	IMFSFRVP	tr|E9Q235|E9Q235_MOUSE|67-74,tr|L7N213|L7N213_MOUSE|67-74
WT	306.6	NA	VSAMKCGL	sp|Q9QYC0|ADDA_MOUSE|248-255,sp|Q9QYB8|ADDB_MOUSE|236-243,tr|F8WGR0|F8WGR0_MOUSE|248-255,tr|E9Q1K3|E9Q1K3_MOUSE|248-255,tr|F8WHZ9|F8WHZ9_MOUSE|248-255
WT	183.5	NA	LVQQFSVL	sp|P48776|T23O_MOUSE|125-132,tr|C5NSA7|C5NSA7_MOUSE|106-113
WT	77.3	NA	GSLPFFLL	sp|Q9JKX8|UPK3A_MOUSE|216-223
WT	261.7	NA	SVFQITTV	sp|Q811M1|RHG15_MOUSE|163-170,tr|B1AW40|B1AW40_MOUSE|163-170
WT	255.6	NA	FTYAKYIV	sp|Q791T5|MTCH1_MOUSE|133-140,tr|D3YXC2|D3YXC2_MOUSE|21-28
WT	115.8	NA	LSAMFFWL	sp|Q9EQQ3|GPR63_MOUSE|162-169
WT	378.9	NA	VLASFYVI	sp|Q5DU41|LRC8B_MOUSE|314-321
WT	21.7	NA	ILFLASPL	sp|Q80WC9|ACSF4_MOUSE|232-239,tr|E9PUI6|E9PUI6_MOUSE|232-239,tr|A0A0R4J1T8|A0A0R4J1T8_MOUSE|232-239
WT	372.2	NA	SFWNKAFL	sp|Q61334|BAP29_MOUSE|46-53
WT	44.6	NA	IYYFVEQL	sp|Q9CZ52|ANTR1_MOUSE|60-67,tr|A0A0N4SV16|A0A0N4SV16_MOUSE|60-67
WT	416.8	NA	NYLKWVFL	tr|A0A0A6YXZ8|A0A0A6YXZ8_MOUSE|133-140
WT	388.9	NA	VFHNPMNL	sp|Q5S003|SPG17_MOUSE|822-829
WT	237	NA	VSDNYTSI	sp|Q8CIP5|DISP2_MOUSE|417-424
WT	24.8	NA	IKYSYEYL	sp|Q69Z23|DYH17_MOUSE|1791-1798,tr|E9Q7P0|E9Q7P0_MOUSE|1791-1798,tr|A2A520|A2A520_MOUSE|809-816,tr|K3W4R0|K3W4R0_MOUSE|1791-1798,tr|A2A519|A2A519_MOUSE|144-151
WT	431.4	NA	VNMCEQAL	sp|Q80YY7|ZN618_MOUSE|922-929,tr|F8WIU3|F8WIU3_MOUSE|829-836
WT	338.1	NA	TMTTRFSL	sp|Q8R1G1|TASP1_MOUSE|186-193,tr|Q3UJT0|Q3UJT0_MOUSE|186-193
WT	193	NA	QALKFLPV	sp|Q7TPM6|FSD1_MOUSE|157-164
WT	4.5	NA	IVFRFLRI	sp|Q8BWC0|TPC2_MOUSE|535-542
WT	125.5	NA	SMLSFSDV	tr|Q8VGX6|Q8VGX6_MOUSE|64-71
WT	266	NA	VAVHSCHL	sp|Q8BXX2|ZBT49_MOUSE|4-11,tr|E9Q2Y5|E9Q2Y5_MOUSE|4-11,tr|D6RE57|D6RE57_MOUSE|4-11,tr|D6RGL5|D6RGL5_MOUSE|4-11,tr|D6RGS0|D6RGS0_MOUSE|4-11,tr|D6RFB4|D6RFB4_MOUSE|4-11,tr|A0A0J9YUI6|A0A0J9YUI6_MOUSE|4-11
WT	238.7	NA	RSWEAAKL	sp|Q8CIW5|PEO1_MOUSE|314-321
WT	157.7	NA	FSSLFPYV	sp|Q8BJI1|S6A17_MOUSE|255-262,sp|Q8BG16|S6A15_MOUSE|256-263,tr|A0A0R4J252|A0A0R4J252_MOUSE|214-221,tr|A0A0R4J087|A0A0R4J087_MOUSE|255-262
WT	467	NA	FALVRTAL	sp|Q99246|CAC1D_MOUSE|1571-1578,sp|Q02789|CAC1S_MOUSE|1468-1475,sp|Q01815|CAC1C_MOUSE|1563-1570,tr|A0A087WS67|A0A087WS67_MOUSE|1588-1595,tr|F8WJL1|F8WJL1_MOUSE|1563-1570,tr|A0A087WRM3|A0A087WRM3_MOUSE|1611-1618,tr|F7CNJ1|F7CNJ1_MOUSE|1202-1209,tr|A0A087WPZ8|A0A087WPZ8_MOUSE|1563-1570,tr|A0A087WQT9|A0A087WQT9_MOUSE|1559-1566,tr|E9Q7B5|E9Q7B5_MOUSE|1468-1475,tr|F8VQE0|F8VQE0_MOUSE|1468-1475,tr|A0A0…
WT	9.2	NA	IVFIAASL	sp|Q3TQR0|PGAP2_MOUSE|147-154,tr|A0A0R4J1P4|A0A0R4J1P4_MOUSE|145-152,tr|D3YYE3|D3YYE3_MOUSE|147-154,tr|A0A0U1RVK1|A0A0U1RVK1_MOUSE|147-154,tr|F7AWQ5|F7AWQ5_MOUSE|99-106
WT	283.7	NA	VGIVHRDL	sp|Q8C1R0|TSSK5_MOUSE|167-174
WT	69.9	NA	SVYHFTNS	sp|Q8K3W0|BRE_MOUSE|329-336,tr|D3Z7P0|D3Z7P0_MOUSE|329-336
WT	47.6	NA	ASCLYYLL	sp|Q8VCU0|ANGE1_MOUSE|3-10
WT	98.4	NA	VYRRCLYL	sp|Q7TN88|PK1L2_MOUSE|1746-1753,tr|E9Q4D4|E9Q4D4_MOUSE|1745-1752,tr|E9QPG2|E9QPG2_MOUSE|1746-1753
WT	2.8	NA	LSYIFTLL	sp|Q9Z0M6|CD97_MOUSE|751-758,tr|E9QMJ5|E9QMJ5_MOUSE|706-713,tr|A0A0D9SEG8|A0A0D9SEG8_MOUSE|657-664,tr|E9QJS7|E9QJS7_MOUSE|751-758,tr|Q9DC42|Q9DC42_MOUSE|655-662
WT	186.5	NA	INLNLGIL	sp|P03888|NU1M_MOUSE|96-103
WT	461.1	NA	TAPRVTPL	tr|F6Z9S8|F6Z9S8_MOUSE|1-8
WT	137.8	NA	LFFRALSL	sp|Q8CHK3|MBOA7_MOUSE|84-91,tr|F6UP63|F6UP63_MOUSE|36-43,tr|A0A0U1RPP4|A0A0U1RPP4_MOUSE|84-91
WT	315.6	NA	IDPIFMHL	tr|Q8VIB8|Q8VIB8_MOUSE|45-52
WT	223.7	NA	VSFVLDII	sp|Q6S5G4|CXA6_MOUSE|219-226
WT	335	NA	IPNIYAAL	sp|Q8VHN7|GPR98_MOUSE|6047-6054,tr|Q8C1E5|Q8C1E5_MOUSE|67-74,tr|B8JJE0|B8JJE0_MOUSE|6047-6054
WT	135.7	NA	IGVFSPSL	sp|Q32P12|CQ053_MOUSE|515-522
WT	300.6	NA	AYLMSQPL	sp|O35490|BHMT1_MOUSE|242-249
WT	110.9	NA	TLQLFSLL	sp|E9Q8I9|FRY_MOUSE|2125-2132,tr|A0A0J9YVH0|A0A0J9YVH0_MOUSE|112-119
WT	499.5	NA	KSLNNFFL	sp|Q8CDM4|CCD73_MOUSE|531-538
WT	192.7	NA	SVLFAVYL	sp|P27548|CD40L_MOUSE|39-46
WT	48.3	NA	IVNEYTTL	sp|Q9D2L9|F111A_MOUSE|292-299,tr|D3YYD2|D3YYD2_MOUSE|248-255
WT	126.1	NA	THYLIPSL	sp|Q91ZV8|AGRA2_MOUSE|247-254,tr|J3QMG7|J3QMG7_MOUSE|247-254
WT	368.5	NA	SMEEYQSL	tr|D3YUW1|D3YUW1_MOUSE|66-73,tr|E9Q2C6|E9Q2C6_MOUSE|66-73,tr|E9Q492|E9Q492_MOUSE|66-73,tr|Q3V0V1|Q3V0V1_MOUSE|66-73
WT	311.9	NA	SMSFQNLL	sp|O54774|AP3D1_MOUSE|1124-1131
WT	40.2	NA	SALTFLRV	sp|Q8CD91|SMOC2_MOUSE|25-32
WT	124.3	NA	TVFIGPGL	sp|Q8C025|CHPT1_MOUSE|327-334,tr|F6X1K1|F6X1K1_MOUSE|3-10,tr|D3YU39|D3YU39_MOUSE|327-334,tr|F7DAN4|F7DAN4_MOUSE|87-94
WT	49	NA	TVTSYSPL	tr|E0CYU6|E0CYU6_MOUSE|221-228
WT	42.4	NA	AAWPFPVL	tr|Q7TPY4|Q7TPY4_MOUSE|57-64
WT	496.9	NA	MAGLYQVL	sp|P58735|S26A1_MOUSE|192-199,tr|D3Z4W4|D3Z4W4_MOUSE|192-199,tr|G5E8U1|G5E8U1_MOUSE|208-215
WT	141.6	NA	ISFLGCIM	tr|Q8VFR3|Q8VFR3_MOUSE|94-101
WT	43.3	NA	SAIAYETL	tr|A2ABX0|A2ABX0_MOUSE|267-274
WT	43.4	NA	IGILIASL	sp|Q91V14|S12A5_MOUSE|570-577,tr|A0A076FR46|A0A076FR46_MOUSE|570-577
WT	168.3	NA	FAVNHFTL	sp|E9PVB5|TTC17_MOUSE|1141-1148,tr|A2AGG1|A2AGG1_MOUSE|568-575
WT	164	NA	IHYRLRLV	sp|Q8K4J2|COE4_MOUSE|109-116,tr|A2BI80|A2BI80_MOUSE|206-213,tr|A2BI84|A2BI84_MOUSE|109-116
WT	22.6	NA	VGFMSFAV	sp|Q6ZQE4|NEMP1_MOUSE|255-262,tr|E9Q6Z3|E9Q6Z3_MOUSE|206-213,tr|Q8K2N3|Q8K2N3_MOUSE|255-262
WT	357.2	NA	VNMTKATV	sp|B1AUH1|PTPRU_MOUSE|786-793,tr|Q3V360|Q3V360_MOUSE|714-721
WT	185.7	NA	SMYGFIGT	sp|Q9JKF6|NECT1_MOUSE|38-45
WT	174.7	NA	TGLRLLPL	sp|Q9QXS1|PLEC_MOUSE|3021-3028,sp|Q9QXS1|PLEC_MOUSE|3680-3687,tr|E9Q3W4|E9Q3W4_MOUSE|2716-2723,tr|E9Q3W4|E9Q3W4_MOUSE|3375-3382,tr|F6R059|F6R059_MOUSE|1045-1052
WT	96.4	NA	SLYVMALM	tr|Q8VGL4|Q8VGL4_MOUSE|34-41
WT	220.5	NA	LNMYASIL	sp|P30993|C5AR1_MOUSE|118-125
WT	443.6	NA	TSWWPLHI	tr|G3UWK8|G3UWK8_MOUSE|62-69
WT	390.2	NA	RGWVINPL	sp|P13808|B3A2_MOUSE|972-979,tr|A0A0R4J1K9|A0A0R4J1K9_MOUSE|963-970,tr|A0A0R4J101|A0A0R4J101_MOUSE|972-979,tr|A0A0R4J1K4|A0A0R4J1K4_MOUSE|958-965
WT	478.8	NA	TALHRLSL	tr|Q6P9N8|Q6P9N8_MOUSE|482-489,tr|G3UYW9|G3UYW9_MOUSE|482-489
WT	258.4	NA	VWYFGGIL	sp|Q91XD3|T4S4_MOUSE|46-53,tr|Q3TMT3|Q3TMT3_MOUSE|46-53
WT	57.6	NA	FSFHLAAV	sp|Q9JJJ7|PORCN_MOUSE|343-350
WT	45.5	NA	RFIAFASL	sp|Q14B80|KCNC2_MOUSE|233-240,tr|E9QLW0|E9QLW0_MOUSE|233-240
WT	39.8	NA	LSITHCNL	sp|Q9D1T0|LIGO1_MOUSE|262-269,tr|A9DA50|A9DA50_MOUSE|268-275
WT	38.7	NA	IGFLYIQA	tr|A0A140LIJ0|A0A140LIJ0_MOUSE|322-329
WT	362.5	NA	ISVLFLLA	tr|Q91XX4|Q91XX4_MOUSE|699-706,tr|Q91XX8|Q91XX8_MOUSE|687-694,tr|Q91XX6|Q91XX6_MOUSE|697-704,tr|Q91XX3|Q91XX3_MOUSE|697-704
WT	27	NA	VNFKPSLL	tr|G3UXG1|G3UXG1_MOUSE|113-120
WT	199.5	NA	QVLRFLGI	sp|Q8BKT6|TSN12_MOUSE|221-228
WT	122.2	NA	TVSVFKRL	sp|Q8R3Y5|CS047_MOUSE|401-408,tr|G5E8E3|G5E8E3_MOUSE|401-408
WT	449.4	NA	ALGSYATL	sp|Q8VHK1|CSKI2_MOUSE|821-828
WT	332.1	NA	LFMQMAEL	sp|P51569|AGAL_MOUSE|68-75,tr|Q8BGZ6|Q8BGZ6_MOUSE|70-77
WT	18.4	NA	LMFGYQFL	sp|P48999|LOX5_MOUSE|231-238,tr|E9Q6H6|E9Q6H6_MOUSE|231-238,tr|E9QA93|E9QA93_MOUSE|231-238,tr|A0A0N4SW45|A0A0N4SW45_MOUSE|231-238
WT	404.5	NA	HGYAFLNT	sp|Q5RJF7|CA2D4_MOUSE|531-538,tr|F8VPL1|F8VPL1_MOUSE|559-566
WT	355.8	NA	LLYNALEL	sp|Q8CDK3|IQUB_MOUSE|401-408
WT	392.2	NA	AVFYAACV	sp|Q8BWW9|PKN2_MOUSE|758-765,tr|G3UZM9|G3UZM9_MOUSE|742-749,tr|G3UXH4|G3UXH4_MOUSE|710-717
WT	8.2	NA	MAFKYQVL	sp|Q8BHW2|OSCP1_MOUSE|96-103
WT	31.7	NA	IIVSYFHI	sp|Q8VFK1|O1009_MOUSE|214-221
WT	364.4	NA	VVNHYLAF	sp|Q62302|TX261_MOUSE|105-112
WT	166.8	NA	SGYAGFIL	sp|A2AM29|AF9_MOUSE|76-83
WT	98.5	NA	KTFPLPLL	tr|Q8BX24|Q8BX24_MOUSE|108-115,tr|A2AKQ0|A2AKQ0_MOUSE|87-94,tr|V9GX08|V9GX08_MOUSE|87-94
WT	24.5	NA	YIFFFLAL	sp|Q7TQB9|TR143_MOUSE|239-246
WT	349.6	NA	SLPFYPFV	sp|Q8CIF6|SIDT2_MOUSE|259-266,tr|F7DF36|F7DF36_MOUSE|49-56,tr|F7B6N2|F7B6N2_MOUSE|30-37,tr|F6SV01|F6SV01_MOUSE|71-78,tr|E0CXC7|E0CXC7_MOUSE|259-266
WT	372.5	NA	LSYKFLGE	sp|Q9JIP6|FZD2_MOUSE|216-223
WT	438.3	NA	TMLVFGPA	sp|Q8R3L5|SO3A1_MOUSE|220-227,tr|D3YXA8|D3YXA8_MOUSE|220-227
WT	174.4	NA	VGLSLIAL	sp|Q9ES07|S15A2_MOUSE|148-155,tr|E9PYQ9|E9PYQ9_MOUSE|128-135,tr|G3XA51|G3XA51_MOUSE|159-166,tr|E9Q329|E9Q329_MOUSE|159-166,tr|E9QMN8|E9QMN8_MOUSE|159-166
WT	204.3	NA	VAPAQARL	sp|Q8C437|PEX5R_MOUSE|179-186,tr|D3YYH0|D3YYH0_MOUSE|203-210,tr|F8SLP9|F8SLP9_MOUSE|179-186,tr|F8SLQ3|F8SLQ3_MOUSE|227-234,tr|F8SLQ1|F8SLQ1_MOUSE|262-269
WT	206.5	NA	VFYIYLAT	tr|E9PUP3|E9PUP3_MOUSE|386-393
WT	56.5	NA	GSYWYFDV	sp|P01793|HVM24_MOUSE|105-112
WT	342.8	NA	KSYLYFEE	sp|Q91X20|ASH2L_MOUSE|510-517,tr|D3YYA0|D3YYA0_MOUSE|421-428,tr|E9PU93|E9PU93_MOUSE|421-428
WT	28.9	NA	LAFPYFPF	sp|Q7TPX9|LEGLB_MOUSE|104-111
WT	107.9	NA	VAFAADGL	sp|Q9EQ15|GNB1L_MOUSE|300-307,tr|Q3TM20|Q3TM20_MOUSE|286-293
WT	40.9	NA	TLALFSHL	sp|Q6ZPY2|SMG5_MOUSE|384-391
WT	88.8	NA	MAYVFYLS	sp|Q9JJL3|SO1B2_MOUSE|412-419
WT	98.6	NA	ITLAFSRT	sp|Q0HA38|TT21B_MOUSE|291-298,tr|E9PVK4|E9PVK4_MOUSE|291-298
WT	39.7	NA	YAISFIFL	sp|Q9EQC4|ELOV4_MOUSE|254-261,tr|V9GXI2|V9GXI2_MOUSE|163-170
WT	10.7	NA	ATYYFTTF	sp|Q8BL99|DOP1_MOUSE|316-323,tr|A0A0B4J1N8|A0A0B4J1N8_MOUSE|316-323,tr|H7BWZ9|H7BWZ9_MOUSE|316-323,tr|A0A087WQ48|A0A087WQ48_MOUSE|307-314
WT	55.6	NA	VVLTLCRL	sp|P52795|EFNB1_MOUSE|17-24
WT	278.1	NA	IFQMMNTL	sp|P29452|CASP1_MOUSE|260-267
WT	91.2	NA	IMLFCLGL	sp|Q9D687|S6A19_MOUSE|422-429
WT	12.6	NA	MTYLYYTF	tr|A2AK57|A2AK57_MOUSE|147-154
WT	303.9	NA	TNLINFLL	tr|Q3UQ05|Q3UQ05_MOUSE|222-229
WT	28.7	NA	VGMLWGAL	sp|Q7TQA7|TA2R3_MOUSE|131-138,tr|A0A0R4J0T3|A0A0R4J0T3_MOUSE|148-155
WT	71	NA	VAILTALL	sp|Q923J1|TRPM7_MOUSE|393-400,tr|A2AI57|A2AI57_MOUSE|393-400
WT	13.4	NA	KAFHFYLV	sp|Q8R2G4|NAR3_MOUSE|136-143,tr|E9Q1U7|E9Q1U7_MOUSE|136-143,tr|A0A0R4J1Q4|A0A0R4J1Q4_MOUSE|136-143,tr|E9Q7Z7|E9Q7Z7_MOUSE|136-143,tr|E9Q7Q8|E9Q7Q8_MOUSE|136-143,tr|A0A0R4J1N4|A0A0R4J1N4_MOUSE|136-143,tr|E9QNU1|E9QNU1_MOUSE|136-143,tr|A0A0R4J1M9|A0A0R4J1M9_MOUSE|136-143,tr|E9Q984|E9Q984_MOUSE|136-143,tr|E9Q9Q8|E9Q9Q8_MOUSE|136-143,tr|F6RER8|F6RER8_MOUSE|75-82,tr|E9Q8Z0|E9Q8Z0_MOUSE|136-143
WT	420.5	NA	VGLNSTAL	sp|Q9EP89|LACTB_MOUSE|532-539
WT	13.2	NA	LTLRYRSL	sp|Q921V5|MGAT2_MOUSE|82-89
WT	365.8	NA	AVFLIALV	sp|P58307|OX1R_MOUSE|55-62
WT	28.1	NA	VNDFYSGL	sp|Q8VE11|MTMR6_MOUSE|295-302
WT	201.5	NA	GYQFLSQL	tr|L7N203|L7N203_MOUSE|221-228,tr|L7N2B2|L7N2B2_MOUSE|221-228
WT	32.9	NA	ASFTHSFV	sp|Q9DB41|GHC2_MOUSE|224-231
WT	163.4	NA	QSYSTSFL	sp|O70576|STAG3_MOUSE|348-355
WT	159.2	NA	TVMVKAYL	sp|Q91XQ0|DYH8_MOUSE|2704-2711
WT	471.2	NA	TLFIGGSL	sp|Q9CXJ4|ABCB8_MOUSE|375-382
WT	150.9	NA	VNVFKLEL	sp|Q61221|HIF1A_MOUSE|541-548,tr|A0A0R4J1E9|A0A0R4J1E9_MOUSE|515-522
WT	402.4	NA	LSAAHPGL	sp|P15806|TFE2_MOUSE|634-641,tr|E9PWE4|E9PWE4_MOUSE|631-638,tr|E9PWE2|E9PWE2_MOUSE|636-643,tr|E9PVV1|E9PVV1_MOUSE|633-640,tr|F6T941|F6T941_MOUSE|621-628,tr|E9PWE3|E9PWE3_MOUSE|628-635,tr|E9PVV2|E9PVV2_MOUSE|632-639,tr|E9PWE5|E9PWE5_MOUSE|631-638,tr|A0A0R4J011|A0A0R4J011_MOUSE|632-639,tr|A0A0R4J014|A0A0R4J014_MOUSE|635-642
WT	300.3	NA	FHFRFWHF	sp|O35646|CAN6_MOUSE|121-128
WT	73.5	NA	VVLPFLLI	tr|Q8VGT2|Q8VGT2_MOUSE|207-214
[truncated: 8,001 more rows]
